# Supplementary material for: Binding profiles for 961DrosophilaandC. eleganstranscription factors reveal tissue-specific regulatory relationships
Source: HighWire-hosted journal article supplement (doi:10.1101/gr.279037.124), 2024-10-22
Supplement: Supplemental_File_S1.xlsx [file Supplemental_File_S1.xlsx]

## Sheet: Supplemental_File_S1_Legend
Supplemental File 1. Lists the TFs and nonTFs for fly and worm that have ChIP-sequencing data or not and their corresponding metadata. The file contains eleven sheets.
Sheet 1 "Fly TFs" Lists all Drosophila melanogaster TFs.
Sheet 2 "Fly TFs with ChIP-seq", lists the TFs that have completed ChIPseq data either in the modENCODE project or the modERN project. Domains listed are based on data from UniProt, Interpro/Pfam, and/or SMART databases.
Sheet 3 "Fly nonTFs with ChIP-seq" lists genes that have ChIP-seq data that were designated as nonTFs. Column “H” indicates the assigned gene classification.
Sheet 4 "Fly TF strains not ChIP'd" lists TFs that do not have data due to failure of ChIP-seq (typically 2-3 failures) or in which GFP-tagged strains were not subject to collection.
Sheet 5 “Fly TFs without strains” are TFs for which GPF-tagged strains were not generated.
Sheet 6 "Worm TFs" Lists all the C.elegans TFs
Sheet 7 "Worm TFs with ChIP-seq", lists the TFs that have completed ChIPseq data either in the modENCODE project or the modERN project. Domains listed are from Fuxmann Bass et al., 2016 or UniProt. Paper publication the dataset is included in is indicated as either Kudron et al., 2018 (2018) or Kudron et al., 2024 (2024).
Sheet 8 "Worm nonTFs with ChIP-seq" lists genes that have ChIP-seq data that were designated as nonTFs. Column “H” indicates the assigned gene classification. Paper publication the dataset is included in is indicated as either Kudron et al., 2018 (2018) or Kudron et al., 2024 (2024).
Sheet 9 "Worm TF strains not ChIP'd" lists TFs that are pending ChIPseq, have been discontinued due to insufficient expression, failing ChIP-seq multiple times, having cytoplasmic expression, being a NHR with no human ortholog, or those that were completed after the data freeze in October 2022. We eliminated many NHRs because they are a rapidly expanding gene family in C. elegans.
Sheet 10 “Worm TFs without strains” are TFs that are pending strain generation (marked as Active) and those that have been discontinued due to low DCPM score or being NHRs.
Sheet 11 "Strains from the worm community" Strain and metadata info for strains received from the worm community

## Sheet: S1.Fly TFs
	TF/non-TF	Flybase ID	Flybase symbol	Strains used for collection	ChipSeq	Reason
1	TF	FBgn0264442	ab	ab-GFP	Yes
2	TF	FBgn0000014	abd-A	abd-A-GFP	Yes
3	TF	FBgn0000015	Abd-B	Abd-B-GFP	Yes
4	TF	FBgn0000022	ac	ac-GFP	Yes
5	TF	FBgn0033749	achi	achi-GFP	Yes
6	TF	FBgn0000028	acj6	acj6-GFP	Yes
7	TF	FBgn0284249	Adf1	Adf1-GFP	Yes
8	TF	FBgn0005694	Aef1	Aef1-GFP	Yes
9	TF	FBgn0000061	al	al-GFP	Yes
10	TF	FBgn0003270	amos	amos-GFP	Yes
11	TF	FBgn0260642	Antp	AntP-MiMIC-GFP	Yes
12	TF	FBgn0000097	aop	aop-GFP	Yes
13	TF	FBgn0267978	ap	ap-GFP	Yes
14	TF	FBgn0015903	apt	apt-GFP	Yes
15	TF	FBgn0015904	ara	ara-GFP	Yes
16	TF	FBgn0035407	Asciz	CG14962-GFP	Yes
17	TF	FBgn0000137	ase	ase-GFP	Yes
18	TF	FBgn0039946	ATbp	ATbp-GFP	Yes
19	TF	FBgn0265193	Atf-2	Atf-2-GFP	Yes
20	TF	FBgn0028550	Atf3	A3-3-GFP	Yes
21	TF	FBgn0033010	Atf6	Atf6-GFP	Yes
22	TF	FBgn0010433	ato	ato-GFP	Yes
23	TF	FBgn0013751	Awh	Awh-GFP	Yes
24	TF	FBgn0025185	az2	az2-GFP	Yes
25	TF	FBgn0011758	B-H1	B-H1-GFP	Yes
26	TF	FBgn0004854	B-H2	B-H2-GFP	Yes
27	TF	FBgn0004870	bab1	bab1-RA_(bab1-s)-GFP	Yes
28	TF	FBgn0025525	bab2	bab2-GFP	Yes
29	TF	FBgn0004862	bap	bap-GFP	Yes
30	TF	FBgn0024251	bbx	bbx-GFP	Yes
31	TF	FBgn0000166	bcd	1T-GFP	Yes
32	TF	FBgn0032512	Bdp1	CG9305-GFP	Yes
33	TF	FBgn0000179	bi	n/a	No	no strain
34	TF	FBgn0039509	bigmax	bigmax-GFP	Yes
35	TF	FBgn0045759	bin	bin-GFP	Yes
36	TF	FBgn0035625	Blimp-1	Blimp-1-GFP	Yes
37	TF	FBgn0053213	Boh1	CG33213-GFP	Yes
38	TF	FBgn0004893	bowl	bowl-GFP	Yes
39	TF	FBgn0283451	br	br-re-GFP, br-rj-GFP, y cn bw speck	Yes
40	TF	FBgn0024250	brk	brk-GFP	Yes
41	TF	FBgn0032130	brwl	CG3838-GFP	Yes
42	TF	FBgn0004101	bs	bs-GFP	Yes
43	TF	FBgn0000529	bsh	bsh-GFP	Yes
44	TF	FBgn0263108	BtbVII	BtbVII-GFP	Yes
45	TF	FBgn0000233	btd	n/a	No	no strain
46	TF	FBgn0014949	btn	btn-GFP	Yes
47	TF	FBgn0032600	BuGZ	CG17912-GFP	Yes
48	TF	FBgn0259176	bun	n/a	No	no strain
49	TF	FBgn0011723	byn	n/a	No	no strain
50	TF	FBgn0004863	C15	C15-GFP	Yes
51	TF	FBgn0000251	cad	Cad-GFP-7T	Yes
52	TF	FBgn0287478	Camta	Camta-MiMIC-GFP	Yes
53	TF	FBgn0004878	cas	cas-GFP	Yes
54	TF	FBgn0024249	cato	cato-GFP	Yes
55	TF	FBgn0015919	caup	caup-GFP	Yes
56	TF	FBgn0043364	cbt	cbt-GFP	Yes
57	TF	FBgn0265574	Cdc5	Cdc5-GFP	No	not collected
58	TF	FBgn0000286	Cf2	Cf2-GFP	Yes
59	TF	FBgn0000289	cg	cg-GFP	Yes
60	TF	FBgn0035702	CG10147	CG10147-GFP	Yes
61	TF	FBgn0033971	CG10209	CG10209-GFP	Yes
62	TF	FBgn0027514	CG1024	CG1024-GFP	Yes
63	TF	FBgn0035690	CG10274	CG10274-GFP	Yes
64	TF	FBgn0034643	CG10321	CG10321-GFP	Yes
65	TF	FBgn0032707	CG10348	CG10348-GFP	Yes
66	TF	FBgn0032814	CG10366	CG10366-GFP	Yes
67	TF	FBgn0032730	CG10431	CG10431-GFP	Yes
68	TF	FBgn0032815	CG10462	CG10462-GFP	Yes
69	TF	FBgn0034570	CG10543	CG10543-GFP	Yes
70	TF	FBgn0032817	CG10631	CG10631-GFP	Yes
71	TF	FBgn0036294	CG10654	CG10654-GFP	Yes
72	TF	FBgn0039329	CG10669	CG10669-GFP	Yes
73	TF	FBgn0034945	CG10904	CG10904-GFP	No	failed ChIP
74	TF	FBgn0032858	CG10949	CG10949-GFP	Yes
75	TF	FBgn0030010	CG10959	CG10959-GFP	Yes
76	TF	FBgn0037379	CG10979	CG10979-GFP	Yes
77	TF	FBgn0030408	CG11085	CG11085-GFP	Yes
78	TF	FBgn0037120	CG11247	CG11247-GFP	Yes
79	TF	FBgn0030058	CG11294	CG11294-GFP	Yes
80	TF	FBgn0040366	CG11398	CG11398-GFP	Yes
81	TF	FBgn0037031	CG11456	CG11456-GFP	Yes
82	TF	FBgn0039733	CG11504	CG11504-GFP	Yes
83	TF	FBgn0036249	CG11560	CG11560-GFP	Yes
84	TF	FBgn0031232	CG11617	CG11617-GFP	Yes
85	TF	FBgn0030316	CG11695	CG11695-GFP	Yes
86	TF	FBgn0030314	CG11696	CG11696-GFP	Yes
87	TF	FBgn0031391	CG11723	CG11723-GFP	Yes
88	TF	FBgn0028647	CG11902	CG11902-GFP	Yes
89	TF	FBgn0034425	CG11906	CG11906-GFP	Yes
90	TF	FBgn0027503	CG11970	CG11970-GFP	No	not collected
91	TF	FBgn0039831	CG12054	n/a	No	no strain
92	TF	FBgn0039808	CG12071	CG12071-GFP	Yes
93	TF	FBgn0035238	CG12104	CG12104-GFP	Yes
94	TF	FBgn0029957	CG12155	CG12155-GFP	Yes
95	TF	FBgn0043796	CG12219	CG12219-GFP	Yes
96	TF	FBgn0029822	CG12236	CG12236-GFP	Yes
97	TF	FBgn0032295	CG12299	CG12299-GFP	Yes
98	TF	FBgn0035137	CG1233	CG1233-GFP	Yes
99	TF	FBgn0033581	CG12391	CG12391-GFP	Yes
100	TF	FBgn0035481	CG12605	CG12605-GFP	Yes
101	TF	FBgn0030952	CG12609	n/a	No	no strain
102	TF	FBgn0033459	CG12744	CG12744-GFP	Yes
103	TF	FBgn0037206	CG12768	CG12768-GFP	Yes
104	TF	FBgn0033252	CG12769	CG12769-GFP	Yes
105	TF	FBgn0033569	CG12942	CG12942-GFP	Yes
106	TF	FBgn0032150	CG13123	CG13123-GFP	Yes
107	TF	FBgn0033627	CG13204	CG13204-GFP	Yes
108	TF	FBgn0035643	CG13287	CG13287-GFP	Yes
109	TF	FBgn0031874	CG13775	CG13775-GFP	Yes
110	TF	FBgn0035157	CG13894	CG13894-GFP	Yes
111	TF	FBgn0031718	CG14014	CG14014-GFP	Yes
112	TF	FBgn0040392	CG14050	CG14050-GFP	Yes
113	TF	FBgn0029895	CG14441	CG14441-GFP	Yes
114	TF	FBgn0037275	CG14655	CG14655-GFP	Yes
115	TF	FBgn0037317	CG14667	CG14667-GFP	Yes
116	TF	FBgn0037920	CG14710	CG14710-GFP	Yes
117	TF	FBgn0037922	CG14711	CG14711-GFP	Yes
118	TF	FBgn0038273	CG14860	CG14860-GFP	Yes
119	TF	FBgn0035414	CG14965	CG14965-GFP	Yes
120	TF	FBgn0035518	CG15011	CG15011-GFP	Yes
121	TF	FBgn0034379	CG15073	CG15073-GFP	Yes
122	TF	FBgn0028878	CG15269	CG15269-GFP	Yes
123	TF	FBgn0031144	CG1529	CG1529-GFP	Yes
124	TF	FBgn0030009	CG15336	CG15336-GFP	Yes
125	TF	FBgn0039712	CG15514	CG15514-GFP	Yes
126	TF	FBgn0030673	CG15601	CG15601-GFP	Yes
127	TF	FBgn0038833	CG15696	CG15696-GFP	Yes
128	TF	FBgn0034120	CG15710	CG15710-GFP	Yes
129	TF	FBgn0035405	CG15812	CG15812-GFP	Yes
130	TF	FBgn0033186	CG1602	CG1602-GFP	Yes
131	TF	FBgn0033185	CG1603	CG1603-GFP	Yes
132	TF	FBgn0033183	CG1620	CG1620-GFP	Yes
133	TF	FBgn0039602	CG1647	CG1647-GFP	Yes
134	TF	FBgn0033449	CG1663	CG1663-GFP	Yes
135	TF	FBgn0037698	CG16779	CG16779-GFP, CG16779-MiMIC-GFP	Yes
136	TF	FBgn0032490	CG16813	CG16813-GFP	Yes
137	TF	FBgn0032491	CG16815	CG16815-GFP	Yes
138	TF	FBgn0028931	CG16863	CG16863-GFP	Yes
139	TF	FBgn0038741	CG17186	CG17186-GFP	Yes
140	TF	FBgn0028895	CG17328	CG17328-GFP	Yes
141	TF	FBgn0036396	CG17359	CG17359-GFP	Yes
142	TF	FBgn0036395	CG17361	CG17361-GFP	Yes
143	TF	FBgn0033934	CG17385	CG17385-GFP	Yes
144	TF	FBgn0032763	CG17568	CG17568-GFP	Yes
145	TF	FBgn0031597	CG17612	CG17612-GFP	Yes
146	TF	FBgn0038550	CG17801	CG17801-GFP	Yes
147	TF	FBgn0038547	CG17803	CG17803-GFP	No	failed ChIP
148	TF	FBgn0038548	CG17806	CG17806-GFP	Yes
149	TF	FBgn0039860	CG1792	CG1792-GFP	Yes
150	TF	FBgn0033491	CG18011	CG18011-GFP	Yes
151	TF	FBgn0030012	CG18262	CG18262-GFP	Yes
152	TF	FBgn0037931	CG18476	CG18476-GFP	Yes
153	TF	FBgn0038592	CG18599	CG18599-GFP	Yes
154	TF	FBgn0042205	CG18764	CG18764-GFP	Yes
155	TF	FBgn0030003	CG2116	CG2116-GFP	Yes
156	TF	FBgn0030005	CG2120	CG2120-GFP	Yes
157	TF	FBgn0030008	CG2129	CG2129-GFP	Yes
158	TF	FBgn0030240	CG2202	CG2202-GFP	Yes
159	TF	FBgn0024975	CG2712	CG2712-GFP	Yes
160	TF	FBgn0030206	CG2889	CG2889-GFP	Yes
161	TF	FBgn0050020	CG30020	CG30020-GFP	Yes
162	TF	FBgn0029928	CG3032	CG3032-GFP	Yes
163	TF	FBgn0050403	CG30403	CG30403-GFP	Yes
164	TF	FBgn0050431	CG30431	CG30431-GFP	Yes
165	TF	FBgn0034946	CG3065	CG3065-GFP	Yes
166	TF	FBgn0051224	CG31224	CG31224-GFP	Yes
167	TF	FBgn0051365	CG31365	CG31365-GFP	Yes
168	TF	FBgn0051388	CG31388	CG31388-GFP	Yes
169	TF	FBgn0051441	CG31441	CG31441-GFP	Yes
170	TF	FBgn0051612	CG31612	n/a	No	no strain
171	TF	FBgn0051627	CG31627	CG31627-GFP	Yes
172	TF	FBgn0034961	CG3163	CG3163-GFP	Yes
173	TF	FBgn0051875	CG31875	n/a	No	no strain
174	TF	FBgn0052006	CG32006	CG32006-GFP	Yes
175	TF	FBgn0052121	CG32121	CG32121-GFP	Yes
176	TF	FBgn0052532	CG32532	CG32532-GFP	Yes
177	TF	FBgn0052767	CG32767	CG32767-GFP	Yes
178	TF	FBgn0052772	CG32772	CG32772-GFP	Yes
179	TF	FBgn0260741	CG3281	CG3281-GFP	Yes
180	TF	FBgn0053017	CG33017	CG33017-GFP	Yes
181	TF	FBgn0053557	CG33557	CG33557-GFP	Yes
182	TF	FBgn0054031	CG34031	n/a	No	no strain
183	TF	FBgn0031573	CG3407	CG3407-GFP	Yes
184	TF	FBgn0085253	CG34224	CG34224-GFP	Yes
185	TF	FBgn0085396	CG34367	CG34367-GFP	Yes
186	TF	FBgn0085405	CG34376	CG34376-GFP	Yes
187	TF	FBgn0029824	CG3726	CG3726-GFP	Yes
188	TF	FBgn0029867	CG3847	CG3847-GFP	Yes
189	TF	FBgn0036423	CG3919	CG3919-GFP	Yes
190	TF	FBgn0038472	CG3995	CG3995-GFP	Yes
191	TF	FBgn0261679	CG42726	CG42726-GFP	Yes
192	TF	FBgn0261705	CG42741	CG42741-GFP	Yes
193	TF	FBgn0034114	CG4282	CG4282-GFP	Yes
194	TF	FBgn0030455	CG4318	CG4318-GFP	Yes
195	TF	FBgn0036274	CG4328	CG4328-GFP	Yes
196	TF	FBgn0263072	CG43347	CG9817-GFP	Yes
197	TF	FBgn0038787	CG4360	CG4360-GFP	Yes
198	TF	FBgn0263772	CG43689	CG43689-GFP	Yes
199	TF	FBgn0039078	CG4374	n/a	No	no strain
200	TF	FBgn0264744	CG44002	CG34406-GFP	Yes
201	TF	FBgn0030432	CG4404	CG4404-GFP	Yes
202	TF	FBgn0038765	CG4424	CG4424-GFP	Yes
203	TF	FBgn0031894	CG4496	CG4496-GFP	Yes
204	TF	FBgn0266441	CG45071	CG6854-GFP	Yes
205	TF	FBgn0029936	CG4617	CG4617-GFP	Yes
206	TF	FBgn0035036	CG4707	CG4707-GFP	Yes
207	TF	FBgn0039355	CG4730	CG4730-GFP	Yes
208	TF	FBgn0037876	CG4820	CG4820-GFP	Yes
209	TF	FBgn0038766	CG4854	CG4854-GFP	Yes
210	TF	FBgn0043457	CG5180	CG5180-GFP	Yes
211	TF	FBgn0038047	CG5245	CG5245-GFP	Yes
212	TF	FBgn0032587	CG5953	CG5953-GFP	Yes
213	TF	FBgn0036155	CG6163	CG6163-GFP	Yes
214	TF	FBgn0037794	CG6254	CG6254-GFP	Yes
215	TF	FBgn0038316	CG6276	CG6276-GFP	Yes
216	TF	FBgn0038301	CG6654	CG6654-GFP	Yes
217	TF	FBgn0035902	CG6683	CG6683-GFP	Yes
218	TF	FBgn0037877	CG6689	CG6689-GFP	Yes
219	TF	FBgn0035903	CG6765	CG6765-GFP	Yes
220	TF	FBgn0037918	CG6791	CG6791-GFP	Yes
221	TF	FBgn0037923	CG6813	CG6813-GFP	Yes
222	TF	FBgn0030963	CG7101	CG7101-GFP	Yes
223	TF	FBgn0036791	CG7271	CG7271-GFP	Yes
224	TF	FBgn0036179	CG7368	CG7368-GFP	Yes
225	TF	FBgn0035691	CG7386	CG7386-GFP	No	failed ChIP
226	TF	FBgn0038626	CG7691	CG7691-GFP	Yes
227	TF	FBgn0033616	CG7745	CG7745-GFP	Yes
228	TF	FBgn0034096	CG7786	CG7786-GFP	Yes
229	TF	FBgn0037584	CG7963	CG7963-GFP	Yes
230	TF	FBgn0038244	CG7987	CG7987-GFP	Yes
231	TF	FBgn0033993	CG8089	CG8089-GFP	Yes
232	TF	FBgn0030664	CG8119	CG8119-GFP	Yes
233	TF	FBgn0037619	CG8159	CG8159-GFP	Yes
234	TF	FBgn0035824	CG8281	CG8281-GFP	Yes
235	TF	FBgn0037717	CG8301	CG8301-GFP	Yes
236	TF	FBgn0037722	CG8319	CG8319-GFP	Yes
237	TF	FBgn0034062	CG8388	CG8388-GFP	Yes
238	TF	FBgn0037746	CG8478	CG8478-GFP, Oregon-R, y cn bw speck	Yes
239	TF	FBgn0036900	CG8765	CG8765-GFP	Yes
240	TF	FBgn0030710	CG8924	CG8924-GFP	Yes
241	TF	FBgn0030680	CG8944	CG8944-GFP	Yes
242	TF	FBgn0030659	CG9215	CG9215-GFP	Yes
243	TF	FBgn0030787	CG9609	CG9609-GFP	Yes
244	TF	FBgn0037445	CG9727	CG9727-GFP	Yes
245	TF	FBgn0034821	CG9876	CG9876-GFP	Yes
246	TF	FBgn0262160	CG9932	CG9932-GFP	Yes
247	TF	FBgn0035721	CG9948	CG9948-GFP	Yes
248	TF	FBgn0029504	CHES-1-like	CHES-1-like-GFP	Yes
249	TF	FBgn0086758	chinmo	chinmo-GFP	Yes
250	TF	FBgn0015371	chn	chn-GFP	Yes
251	TF	FBgn0004859	ci	ci-GFP	Yes
252	TF	FBgn0262582	cic	cic-GFP	Yes
253	TF	FBgn0015025	CkIIalpha-i1	CKIIalpha-i1-GFP	Yes
254	TF	FBgn0032979	Clamp	CG1832-GFP	Yes
255	TF	FBgn0023076	Clk	Clk-GFP	Yes
256	TF	FBgn0262975	cnc	cnc-GFP, y cn bw speck	Yes
257	TF	FBgn0263240	Coop	CG1621-GFP	Yes
258	TF	FBgn0261573	CoRest	CoRest-GFP	Yes
259	TF	FBgn0029939	Cph	n/a	No	no strain
260	TF	FBgn0000370	crc	crc-MiMIC-GFP	Yes
261	TF	FBgn0004396	CrebA	CrebA-MiMIC-GFP	Yes
262	TF	FBgn0265784	CrebB	CrebB-GFP	Yes
263	TF	FBgn0021738	Crg-1	Crg-1-GFP	Yes
264	TF	FBgn0014143	croc	croc-GFP	Yes
265	TF	FBgn0020309	crol	crol-GFP	Yes
266	TF	FBgn0001994	crp	crp-GFP	Yes
267	TF	FBgn0004198	ct	n/a	No	no strain
268	TF	FBgn0035769	CTCF	CTCF-GFP, Oregon-R	Yes
269	TF	FBgn0259938	cwo	cwo-GFP	Yes
270	TF	FBgn0023094	cyc	cyc-GFP	Yes
271	TF	FBgn0000411	D	D-GFP, y cn bw speck	Yes
272	TF	FBgn0000412	D1	D1-GFP	Yes
273	TF	FBgn0022935	D19A	D19A-GFP	Yes
274	TF	FBgn0022699	D19B	D19B-GFP	Yes
275	TF	FBgn0267821	da	da-GFP	Yes
276	TF	FBgn0005677	dac	dac-GFP	Yes
277	TF	FBgn0039286	dan	dan-GFP	Yes
278	TF	FBgn0039283	danr	danr-GFP	Yes
279	TF	FBgn0263239	dar1	n/a	No	no strain
280	TF	FBgn0262636	dati	dati-GFP	Yes
281	TF	FBgn0261723	Dbx	Dbx-GFP	Yes
282	TF	FBgn0013799	Deaf1	Deaf1-GFP	Yes
283	TF	FBgn0000439	Dfd	10T-Dfd-GFP	Yes
284	TF	FBgn0011274	Dif	Dif-GFP	Yes
285	TF	FBgn0023091	dimm	dimm-GFP	Yes
286	TF	FBgn0000459	disco	n/a	No	no strain
287	TF	FBgn0285879	disco-r	disco-r-GFP	Yes
288	TF	FBgn0260632	dl	dl-small-GFP	Yes
289	TF	FBgn0040466	Dlip2	Dip2-GFP	Yes
290	TF	FBgn0040465	Dlip3	Dip3-GFP	Yes
291	TF	FBgn0000157	Dll	Dll-GFP, y cn bw speck	Yes
292	TF	FBgn0030477	dmrt11E	dmrt11E-GFP	Yes
293	TF	FBgn0038851	dmrt93B	dmrt93B-GFP	Yes
294	TF	FBgn0039683	dmrt99B	dmrt99B-GFP	Yes
295	TF	FBgn0028789	Doc1	n/a	No	no strain
296	TF	FBgn0035956	Doc2	Doc2-GFP	Yes
297	TF	FBgn0035954	Doc3	Doc3-GFP	Yes
298	TF	FBgn0011763	Dp	Dp-GFP	Yes
299	TF	FBgn0010109	dpn	dpn-GFP, dpn-MiMIC-GFP	Yes
300	TF	FBgn0000492	Dr	n/a	No	no strain
301	TF	FBgn0015664	Dref	Dref-GFP	Yes
302	TF	FBgn0085369	Drgx	Drgx-GFP	Yes
303	TF	FBgn0024244	drm	drm-GFP	Yes
304	TF	FBgn0015381	dsf	dsf-GFP	Yes
305	TF	FBgn0000504	dsx	dsx-GFP	Yes
306	TF	FBgn0020307	dve	dve-GFP	Yes
307	TF	FBgn0000520	dwg	dwg-GFP	No	not collected
308	TF	FBgn0039411	dysf	dysf-GFP	Yes
309	TF	FBgn0000541	E(bx)	E(bx)-GFP	Yes
310	TF	FBgn0002609	E(spl)m3-HLH	E(spl)m3-HLH-GFP	Yes
311	TF	FBgn0002631	E(spl)m5-HLH	E(spl)m5-GFP	Yes
312	TF	FBgn0002633	E(spl)m7-HLH	HLHm7-GFP	Yes
313	TF	FBgn0000591	E(spl)m8-HLH	E(spl)m8-HLH-GFP	Yes
314	TF	FBgn0002733	E(spl)mbeta-HLH	E(spl)m-beta-GFP	Yes
315	TF	FBgn0002734	E(spl)mdelta-HLH	E(spl)m-delta-GFP	Yes
316	TF	FBgn0002735	E(spl)mgamma-HLH	Esplmgamma-HLH-GFP	Yes
317	TF	FBgn0260243	E(var)3-9	E(var)3-9-GFP	Yes
318	TF	FBgn0011766	E2f1	E2f1-GFP	Yes
319	TF	FBgn0024371	E2f2	E2F2-GFP	Yes
320	TF	FBgn0008646	E5	n/a	No	no strain
321	TF	FBgn0000546	EcR	EcR-GFP	Yes
322	TF	FBgn0000560	eg	eg-GFP	Yes
323	TF	FBgn0000567	Eip74EF	Eip74EF-GFP	Yes
324	TF	FBgn0000568	Eip75B	Eip75B-MiMIC-GFP	Yes
325	TF	FBgn0004865	Eip78C	Eip78C-GFP	Yes
326	TF	FBgn0264490	Eip93F	Eip93F-MiMIC-GFP	Yes
327	TF	FBgn0000227	Elba1	Elba1-GFP	No	not collected
328	TF	FBgn0031435	Elba2	CG9883-GFP	Yes
329	TF	FBgn0000575	emc	emc-GFP	Yes
330	TF	FBgn0000576	ems	16T-GFP	Yes
331	TF	FBgn0000577	en	3T-GFP	Yes
332	TF	FBgn0031375	erm	erm-GFP	Yes
333	TF	FBgn0035849	ERR	ERR-GFP	Yes
334	TF	FBgn0287768	esg	esg-GFP	Yes
335	TF	FBgn0005660	Ets21C	d.ets6-GFP	Yes
336	TF	FBgn0005658	Ets65A	ets3-GFP	Yes
337	TF	FBgn0039225	Ets96B	Ets96B-GFP	Yes
338	TF	FBgn0004510	Ets97D	Delg-GFP	Yes
339	TF	FBgn0005659	Ets98B	Ets98B-GFP	Yes
340	TF	FBgn0000606	eve	5T-GFP	Yes
341	TF	FBgn0005427	ewg	ewg-GFP	Yes
342	TF	FBgn0000611	exd	exd-GFP	No	failed ChIP
343	TF	FBgn0041156	exex	exex-GFP	Yes
344	TF	FBgn0005558	ey	ey-GFP	Yes
345	TF	FBgn0000625	eyg	eyg-GFP	Yes
346	TF	FBgn0039937	fd102C	fd102C-GFP	Yes
347	TF	FBgn0031086	fd19B	fd19B-GFP	Yes
348	TF	FBgn0264954	fd3F	fd3F-GFP	Yes
349	TF	FBgn0004896	fd59A	fd59A-GFP	Yes
350	TF	FBgn0004897	fd96Ca	fd96Ca-GFP	Yes
351	TF	FBgn0004898	fd96Cb	fd96Cb-GFP	Yes
352	TF	FBgn0037475	Fer1	Fer1-GFP	Yes
353	TF	FBgn0038402	Fer2	Fer2-GFP	Yes
354	TF	FBgn0037937	Fer3	Fer3-GFP	Yes
355	TF	FBgn0000659	fkh	fkh-GFP	Yes
356	TF	FBgn0036134	FoxK	FoxK-GFP	Yes
357	TF	FBgn0004895	FoxL1	fd64A-GFP	Yes
358	TF	FBgn0038197	foxo	foxo-GFP, foxo-MiMIC-GFP	Yes
359	TF	FBgn0262477	FoxP	fd85E-GFP	Yes
360	TF	FBgn0004652	fru	fru-MiMIC-GFP, y cn bw speck	Yes
361	TF	FBgn0001077	ftz	n/a	No	no strain
362	TF	FBgn0001078	ftz-f1	ftz-f1-GFP	Yes
363	TF	FBgn0039932	fuss	CG11093-GFP	Yes
364	TF	FBgn0032223	GATAd	GATAd-GFP	Yes
365	TF	FBgn0038391	GATAe	GATAe-GFP	Yes
366	TF	FBgn0261703	gce	gce-GFP	Yes
367	TF	FBgn0014179	gcm	gcm-GFP	Yes
368	TF	FBgn0019809	gcm2	gcm2-GFP	Yes
369	TF	FBgn0050011	gem	gem-GFP	Yes
370	TF	FBgn0250732	gfzf	gfzf-GFP	Yes
371	TF	FBgn0004618	gl	gl-GFP	Yes
372	TF	FBgn0267336	Glut4EF	n/a	No	no strain
373	TF	FBgn0001133	grau	grau-GFP	Yes
374	TF	FBgn0259211	grh	grh-GFP	Yes
375	TF	FBgn0001138	grn	grn-GFP	Yes
376	TF	FBgn0001148	gsb	gsb-GFP	Yes
377	TF	FBgn0001147	gsb-n	gsb-n-GFP	Yes
378	TF	FBgn0010323	Gsc	Gsc-GFP	Yes
379	TF	FBgn0001150	gt	gt-GFP	Yes
380	TF	FBgn0010825	Gug	Gug-GFP	Yes
381	TF	FBgn0016660	H15	H15-GFP	Yes
382	TF	FBgn0001170	H2.0	H2.0-GFP	Yes
383	TF	FBgn0045852	ham	ham-GFP	Yes
384	TF	FBgn0032209	Hand	Hand-GFP	Yes
385	TF	FBgn0026575	hang	hang-GFP	No	not collected
386	TF	FBgn0001180	hb	hb-GFP	Yes
387	TF	FBgn0008636	hbn	hbn-GFP	Yes
388	TF	FBgn0001185	her	her-GFP	Yes
389	TF	FBgn0030899	Hesr	n/a	No	no strain
390	TF	FBgn0027788	Hey	Hey-GFP	Yes
391	TF	FBgn0040318	HGTX	HGTX-GFP	Yes
392	TF	FBgn0038852	HHEX	CG7056-GFP	Yes
393	TF	FBgn0025635	Hinfp	CG17829-GFP	Yes
394	TF	FBgn0261434	hkb	hkb-GFP, y cn bw speck	Yes
395	TF	FBgn0011276	HLH3B	HLH3B-GFP	Yes
396	TF	FBgn0011277	HLH4C	HLH4C-GFP	Yes
397	TF	FBgn0022740	HLH54F	HLH54F-GFP	Yes
398	TF	FBgn0004362	HmgD	HmgD-GFP	Yes
399	TF	FBgn0010228	HmgZ	HmgZ-GFP	Yes
400	TF	FBgn0264005	Hmx	Hmx-MiMIC-GFP	Yes
401	TF	FBgn0004914	Hnf4	Hnf4-GFP	Yes
402	TF	FBgn0034599	hng1	CG9437-GFP	Yes
403	TF	FBgn0037634	hng2	CG8359-GFP	Yes
404	TF	FBgn0035160	hng3	CG13897-GFP	Yes
405	TF	FBgn0000448	Hr3	Hr3-GFP	Yes
406	TF	FBgn0014859	Hr38	Hr38-GFP	Yes
407	TF	FBgn0261239	Hr39	Hr39-RC-GFP, y cn bw speck	Yes
408	TF	FBgn0264562	Hr4	Hr4-GFP	Yes
409	TF	FBgn0034012	Hr51	Dhr51-GFP	Yes
410	TF	FBgn0015239	Hr78	Hr78-GFP	Yes
411	TF	FBgn0037436	Hr83	Hr83-GFP	Yes
412	TF	FBgn0015240	Hr96	Hr96-GFP	Yes
413	TF	FBgn0001168	hry	15T-GFP	Yes
414	TF	FBgn0001222	Hsf	Hsf-GFP	Yes
415	TF	FBgn0001235	hth	y cn bw speck	Yes
416	TF	FBgn0286204	ich	CG11966-GFP	Yes
417	TF	FBgn0038768	idc	CG4936-GFP	Yes
418	TF	FBgn0025776	ind	ind-GFP	Yes
419	TF	FBgn0035213	indra	CG2199-GFP	Yes
420	TF	FBgn0031434	insv	insv-GFP	Yes
421	TF	FBgn0001269	inv	inv-GFP	Yes
422	TF	FBgn0036126	Irbp18	CG6272-GFP	Yes
423	TF	FBgn0039350	jigr1	jigr1-GFP	Yes
424	TF	FBgn0027339	jim	jim-GFP	Yes
425	TF	FBgn0086655	jing	jing-GFP	Yes
426	TF	FBgn0001291	Jra	Jra-GFP	Yes
427	TF	FBgn0015396	jumu	jumu-MiMIC-GFP	Yes
428	TF	FBgn0035144	Kah	kah-GFP	Yes
429	TF	FBgn0001297	kay	kay-GFP	Yes
430	TF	FBgn0011236	ken	ken-GFP	Yes
431	TF	FBgn0014931	kipf	CG2678-GFP	Yes
432	TF	FBgn0025679	Klf15	Bteb2-GFP	Yes
433	TF	FBgn0013469	klu	klu-GFP	Yes
434	TF	FBgn0032473	kmg	CG5204-GFP	Yes
435	TF	FBgn0001319	kn	kn-GFP	No	failed ChIP
436	TF	FBgn0001320	kni	kni-GFP	Yes
437	TF	FBgn0001323	knrl	knrl-GFP	Yes
438	TF	FBgn0001325	Kr	Kr-GFP	Yes
439	TF	FBgn0266450	Kr-h1	Kr-h1-GFP	Yes
440	TF	FBgn0288433	L	Oaz-GFP	Yes
441	TF	FBgn0002561	l(1)sc	l(1)sc-GFP	Yes
442	TF	FBgn0265276	l(3)neo38	l(3)neo38-GFP	Yes
443	TF	FBgn0002522	lab	lab-GFP	Yes
444	TF	FBgn0011278	lbe	lbe-GFP	Yes
445	TF	FBgn0008651	lbl	n/a	No	no strain
446	TF	FBgn0041111	lilli	lilli-GFP	Yes
447	TF	FBgn0026411	Lim1	Lim1-GFP	No	failed ChIP
448	TF	FBgn0002023	Lim3	Lim3-GFP	Yes
449	TF	FBgn0033458	Lime	n/a	No	no strain
450	TF	FBgn0039039	lmd	lmd-GFP	Yes
451	TF	FBgn0034520	lms	lms-GFP	Yes
452	TF	FBgn0052105	Lmx1a	n/a	No	no strain
453	TF	FBgn0283521	lola	lola-J-GFP, lola-RI-GFP	Yes
454	TF	FBgn0266129	lov	lov-GFP, y cn bw speck	Yes
455	TF	FBgn0040765	luna	luna-MiMIC-GFP	Yes
456	TF	FBgn0002576	lz	lz-GFP	Yes
457	TF	FBgn0037621	M1BP	CG9797-GFP	Yes
458	TF	FBgn0032493	Mabi	CG15479-GFP	Yes
459	TF	FBgn0011648	Mad	Mad-GFP	Yes
460	TF	FBgn0034534	maf-S	maf-S-GFP	Yes
461	TF	FBgn0267033	mamo	n/a	No	no strain
462	TF	FBgn0017578	Max	Max-GFP	Yes
463	TF	FBgn0038016	MBD-R2	MBD-R2-GFP	Yes
464	TF	FBgn0288966	Med	Med-GFP	Yes
465	TF	FBgn0011656	Mef2	Mef2-GFP	Yes
466	TF	FBgn0025874	Meics	Meics-GFP	Yes
467	TF	FBgn0037207	Mes2	Mes2-GFP	Yes
468	TF	FBgn0034240	MESR4	MESR4-GFP	Yes
469	TF	FBgn0002723	Met	Met-GFP	Yes
470	TF	FBgn0261963	mid	mid-GFP	Yes
471	TF	FBgn0014343	mirr	mirr-GFP	Yes
472	TF	FBgn0263112	Mitf	n/a	No	no strain
473	TF	FBgn0263490	mld	mld-GFP	Yes
474	TF	FBgn0023215	Mnt	Mnt-GFP	Yes
475	TF	FBgn0032940	Mondo	Mio-GFP	Yes
476	TF	FBgn0052296	Mrtf	Mrtf-GFP	Yes
477	TF	FBgn0027951	MTA1-like	MTA1-like-GFP	No	not collected
478	TF	FBgn0040305	MTF-1	MTF-1-GFP	Yes
479	TF	FBgn0002914	Myb	Myb-GFP	Yes
480	TF	FBgn0262656	Myc	Myc-GFP, y cn bw speck	Yes
481	TF	FBgn0002922	nau	nau-GFP	Yes
482	TF	FBgn0034650	NC2alpha	NC2alpha-GFP	Yes
483	TF	FBgn0028926	NC2beta	NC2beta-GFP	Yes
484	TF	FBgn0028999	nerfin-1	nerfin-1-GFP	Yes
485	TF	FBgn0041105	nerfin-2	nerfin-2-GFP	Yes
486	TF	FBgn0002931	net	net-GFP	Yes
487	TF	FBgn0037085	Neu2	Neu2-GFP	Yes
488	TF	FBgn0035993	Nf-YA	Nf-YA-GFP	Yes
489	TF	FBgn0032816	Nf-YB	Nf-YB-GFP	Yes
490	TF	FBgn0029905	Nf-YC	Nf-Yc-GFP	Yes
491	TF	FBgn0030505	NFAT	NFAT-GFP	Yes
492	TF	FBgn0042696	NfI	NfI-GFP	Yes
493	TF	FBgn0024321	NK7.1	NK7.1-GFP	Yes
494	TF	FBgn0038549	Nnk	CG17802-GFP	Yes
495	TF	FBgn0037617	nom	CG8145-GFP	Yes
496	TF	FBgn0085424	nub	nub-GFP	Yes
497	TF	FBgn0004102	oc	oc-GFP	Yes
498	TF	FBgn0002985	odd	odd-GFP	Yes
499	TF	FBgn0038551	Odj	CG7357-GFP	Yes
500	TF	FBgn0026058	OdsH	OdsH-GFP	Yes
501	TF	FBgn0032651	Oli	Oli-GFP	Yes
502	TF	FBgn0028996	onecut	onecut-GFP	Yes
503	TF	FBgn0003002	opa	n/a	No	no strain
504	TF	FBgn0050443	Opbp	Opbp-GFP	Yes
505	TF	FBgn0025360	Optix	Optix-GFP	Yes
506	TF	FBgn0021767	org-1	org-1-GFP	Yes
507	TF	FBgn0015524	otp	otp-GFP	Yes
508	TF	FBgn0037618	ouib	CG11762-GFP	Yes
509	TF	FBgn0003028	ovo	ovo-GFP	Yes
510	TF	FBgn0039044	p53	p53-MiMIC-GFP	Yes
511	TF	FBgn0038418	pad	pad-GFP	Yes
512	TF	FBgn0085432	pan	Hr3-GFP, pan-GFP, y cn bw speck	Yes
513	TF	FBgn0031610	Paris	CG15436-GFP	Yes
514	TF	FBgn0051481	pb	pb-GFP	Yes
515	TF	FBgn0037540	Pbp95	n/a	No	no strain
516	TF	FBgn0004394	pdm2	pdm2-GFP	Yes
517	TF	FBgn0261588	pdm3	pdm3-GFP	Yes
518	TF	FBgn0016694	Pdp1	Pdp1-GFP, Pdp1-MiMIC-GFP	Yes
519	TF	FBgn0003053	peb	peb-GFP	Yes
520	TF	FBgn0025334	PHDP	PHDP-GFP	Yes
521	TF	FBgn0002521	pho	pho-GFP	Yes
522	TF	FBgn0035997	phol	phol-GFP	Yes
523	TF	FBgn0036522	Phs	CG7372-GFP	Yes
524	TF	FBgn0034878	pita	Pita-GFP	Yes
525	TF	FBgn0032401	Plzf	CG6792-GFP	Yes
526	TF	FBgn0003117	pnr	n/a	No	no strain
527	TF	FBgn0003118	pnt	pnt-MiMIC-GFP	Yes
528	TF	FBgn0003129	Poxm	n/a	No	no strain
529	TF	FBgn0003130	Poxn	Poxn-GFP	Yes
530	TF	FBgn0023489	Pph13	n/a	No	no strain
531	TF	FBgn0003145	prd	prd-GFP, y cn bw speck	Yes
532	TF	FBgn0035687	Prdm13	CG13296-GFP	Yes
533	TF	FBgn0285971	prg	fu2-GFP	Yes
534	TF	FBgn0004595	pros	pros-GFP	Yes
535	TF	FBgn0263102	psq	psq-GFP, y cn bw speck	Yes
536	TF	FBgn0020912	Ptx1	Ptx1-GFP	Yes
537	TF	FBgn0259785	pzg	pzg-GFP	Yes
538	TF	FBgn0037620	ranshi	ranshi-GFP	Yes
539	TF	FBgn0015799	Rbf	n/a	No	no strain
540	TF	FBgn0038390	Rbf2	n/a	No	no strain
541	TF	FBgn0014018	Rel	Rel-GFP	Yes
542	TF	FBgn0011701	repo	repo-GFP	Yes
543	TF	FBgn0039209	REPTOR	CG13624-GFP	Yes
544	TF	FBgn0032202	REPTOR-BP	CG18619-GFP	Yes
545	TF	FBgn0004795	retn	n/a	No	no strain
546	TF	FBgn0020379	Rfx	Rfx-GFP	Yes
547	TF	FBgn0267792	rgr	rgr-GFP	Yes
548	TF	FBgn0003254	rib	rib-GFP	Yes
549	TF	FBgn0267337	rn	rn-GFP	Yes
550	TF	FBgn0003267	ro	ro-GFP	Yes
551	TF	FBgn0033998	row	row-GFP	Yes
552	TF	FBgn0003300	run	run-GFP	Yes
553	TF	FBgn0083981	RunxA	n/a	No	no strain
554	TF	FBgn0259162	RunxB	RunxB-GFP	Yes
555	TF	FBgn0020617	Rx	Rx-GFP	Yes
556	TF	FBgn0037672	sage	sage-GFP	Yes
557	TF	FBgn0261648	salm	salm-GFP	Yes
558	TF	FBgn0000287	salr	salr-GFP	Yes
559	TF	FBgn0004170	sc	sc-GFP, y cn bw speck	Yes
560	TF	FBgn0040918	schlank	schlank-GFP	Yes
561	TF	FBgn0003339	Scr	Scr-GFP	Yes
562	TF	FBgn0287186	scro	scro-GFP	Yes
563	TF	FBgn0004880	scrt	scrt-GFP	Yes
564	TF	FBgn0003345	sd	sd-GFP	Yes
565	TF	FBgn0002573	sens	sens-GFP	Yes
566	TF	FBgn0051632	sens-2	sens-2-GFP	Yes
567	TF	FBgn0028991	seq	seq-GFP	Yes
568	TF	FBgn0003396	shn	shn-GFP	Yes
569	TF	FBgn0032741	Sidpn	Sidpn-GFP, side-MiMIC-GFP	Yes
570	TF	FBgn0004666	sim	sim-GFP	Yes
571	TF	FBgn0266411	sima	sima-RB-GFP	Yes
572	TF	FBgn0003411	sisA	sisA-GFP	Yes
573	TF	FBgn0027364	Six4	Six4-GFP	Yes
574	TF	FBgn0005638	slbo	slbo-GFP	Yes
575	TF	FBgn0002941	slou	slou-GFP	Yes
576	TF	FBgn0003430	slp1	slp1-GFP	Yes
577	TF	FBgn0004567	slp2	9T-GFP	Yes
578	TF	FBgn0025800	Smox	Smox-GFP	Yes
579	TF	FBgn0265523	Smr	n/a	No	no strain
580	TF	FBgn0003448	sna	sna-GFP	Yes
581	TF	FBgn0085450	Snoo	Snoo-MIMIC-GFP	Yes
582	TF	FBgn0003460	so	so-GFP	Yes
583	TF	FBgn0004892	sob	sob-GFP	Yes
584	TF	FBgn0024288	Sox100B	Sox100B-GFP	Yes
585	TF	FBgn0039938	Sox102F	Sox102F-GFP	Yes
586	TF	FBgn0005612	Sox14	Sox14-GFP	Yes
587	TF	FBgn0005613	Sox15	Sox15-GFP	Yes
588	TF	FBgn0036411	Sox21a	n/a	No	no strain
589	TF	FBgn0042630	Sox21b	n/a	No	no strain
590	TF	FBgn0029123	SoxN	SoxN-GFP	Yes
591	TF	FBgn0020378	Sp1	Sp1-GFP	Yes
592	TF	FBgn0039169	Spps	Spps-GFP	Yes
593	TF	FBgn0010768	sqz	sqz-GFP	Yes
594	TF	FBgn0003499	sr	sr-GFP	Yes
595	TF	FBgn0261283	SREBP	SREBP-GFP	Yes
596	TF	FBgn0003507	srp	n/a	No	no strain
597	TF	FBgn0003511	Sry-beta	Sry-beta-GFP	Yes
598	TF	FBgn0003512	Sry-delta	Sry-delta-GFP	Yes
599	TF	FBgn0003513	ss	ss-GFP	Yes
600	TF	FBgn0036248	ssp	ssp-GFP	Yes
601	TF	FBgn0016917	Stat92E	Stat92E-GFP	Yes
602	TF	FBgn0001978	stc	stc-GFP	Yes
603	TF	FBgn0003459	stwl	stwl-GFP	Yes
604	TF	FBgn0004837	Su(H)	Su(H)-GFP, y cn bw speck	Yes
605	TF	FBgn0003567	su(Hw)	SuHw-GFP	Yes
606	TF	FBgn0033782	sug	sug-GFP	Yes
607	TF	FBgn0005561	sv	sv-GFP	Yes
608	TF	FBgn0003651	svp	svp-GFP	Yes
609	TF	FBgn0041092	tai	tai-GFP	Yes
610	TF	FBgn0015550	tap	tap-GFP	Yes
611	TF	FBgn0003683	term	term-GFP	Yes
612	TF	FBgn0038805	TFAM	TFAM-GFP	Yes
613	TF	FBgn0261953	TfAP-2	TfAP-2-GFP	Yes
614	TF	FBgn0264075	tgo	tgo-GFP	Yes
615	TF	FBgn0038978	tHMG1	CG7045-GFP	Yes
616	TF	FBgn0038979	tHMG2	n/a	No	no strain
617	TF	FBgn0004110	tin	tin-GFP	Yes
618	TF	FBgn0028979	tio	tio-GFP	Yes
619	TF	FBgn0000964	tj	tj-GFP	Yes
620	TF	FBgn0003720	tll	8T-GFP	Yes
621	TF	FBgn0036285	toe	toe-GFP	Yes
622	TF	FBgn0037751	topi	topi-GFP	Yes
623	TF	FBgn0019650	toy	toy-GFP	Yes
624	TF	FBgn0038767	trem	trem-GFP	Yes
625	TF	FBgn0262139	trh	trh-GFP	Yes
626	TF	FBgn0013263	Trl	Trl-MiMIC-GFP, y cn bw speck	Yes
627	TF	FBgn0003866	tsh	n/a	No	no strain
628	TF	FBgn0003870	ttk	ttk-GFP	Yes
629	TF	FBgn0003896	tup	Tup-GFP	Yes
630	TF	FBgn0003900	twi	twi-GFP	Yes
631	TF	FBgn0288888	tx	tx-GFP	Yes
632	TF	FBgn0003944	Ubx	n/a	No	no strain
633	TF	FBgn0024184	unc-4	unc-4-GFP	Yes
634	TF	FBgn0015561	unpg	unpg-GFP	Yes
635	TF	FBgn0029711	Usf	Usf-GFP	Yes
636	TF	FBgn0003963	ush	ush-GFP	Yes
637	TF	FBgn0003964	usp	usp-GFP	Yes
638	TF	FBgn0033748	vis	n/a	No	no strain
639	TF	FBgn0261930	vnd	vnd-GFP	Yes
640	TF	FBgn0016076	vri	vri-GFP	Yes
641	TF	FBgn0263511	Vsx1	Vsx1-GFP	Yes
642	TF	FBgn0263512	Vsx2	Vsx2-GFP	Yes
643	TF	FBgn0086680	vvl	vvl-GFP	Yes
644	TF	FBgn0005642	wdn	wdn-GFP	Yes
645	TF	FBgn0001990	wek	wek-GFP	Yes
646	TF	FBgn0010328	woc	woc-GFP	Yes
647	TF	FBgn0001983	wor	wor-GFP	Yes
648	TF	FBgn0021872	Xbp1	Xbp1-GFP	Yes
649	TF	FBgn0261113	Xrp1	Xrp1-GFP	Yes
650	TF	FBgn0004050	z	z-GFP	Yes
651	TF	FBgn0037921	Zaf1	CG6808-GFP	Yes
652	TF	FBgn0004053	zen	zen-GFP	Yes
653	TF	FBgn0004054	zen2	zen2-GFP	Yes
654	TF	FBgn0270924	zf30C	zf30C-GFP	Yes
655	TF	FBgn0004606	zfh1	zfh1-GFP	Yes
656	TF	FBgn0004607	zfh2	zfh2-GFP	Yes
657	TF	FBgn0037446	Zif	Zif-GFP	Yes
658	TF	FBgn0039740	ZIPIC	CG7928-GFP	Yes
659	TF	FBgn0259789	zld	vfl-GFP	Yes

## Sheet: S2.Fly TFs with ChIP-seq
	Flybase ID	Flybase symbol (2023)	Symbol used on site	Strain	Antibody	Stage	Domain	Peaks		Publication Date
1	FBgn0264442	ab	ab	ab-GFP	Kevin White goat-anti-GFP-UC	embryonic	ZF C2H2	1872		2018
2	FBgn0000014	abd-A	abd-A	abd-A-GFP	Kevin White goat-anti-GFP-UC	embryonic	HD HOX	14000		2018
3	FBgn0000015	Abd-B	Abd-B	Abd-B-GFP	Kevin White goat-anti-GFP-UC	embryonic	HD HOX	5190		2018
4	FBgn0000015	Abd-B	Abd-B	Abd-B-GFP	Abcam ab290	wandering third instar larva	HD HOX	238		2018
5	FBgn0000022	ac	ac	ac-GFP	Kevin White goat-anti-GFP-UC	embryonic	bHLH	3375		2018
6	FBgn0033749	achi	achi	achi-GFP	Kevin White goat-anti-GFP-UC	prepupa	HD	8993		2018
7	FBgn0000028	acj6	acj6	acj6-GFP	Kevin White goat-anti-GFP-UC	prepupa	HD POU	8214		2018
8	FBgn0284249	Adf1	Adf1	Adf1-GFP	Abcam ab290	embryonic	MADF BESS	5607		2018
9	FBgn0005694	Aef1	Aef1	Aef1-GFP	Kevin White goat-anti-GFP-UC	embryonic	ZF C2H2	4971		2018
10	FBgn0000061	al	al	al-GFP	Kevin White goat-anti-GFP-UC	embryonic	HD PRD	3848		2018
11	FBgn0003270	amos	amos	amos-GFP	Abcam ab290	embryonic	bHLH	5860		2018
12	FBgn0260642	Antp	Antp	AntP-MiMIC-GFP	Kevin White goat-anti-GFP-UC	embryonic	HD HOX	4068		2018
13	FBgn0000097	aop	aop	aop-GFP	Kevin White goat-anti-GFP-UC	embryonic	ETS	1725		2018
14	FBgn0267978	ap	ap	ap-GFP	Kevin White goat-anti-GFP-UC	embryonic	HD LIM	3318		2018
15	FBgn0015903	apt	apt	apt-GFP	Abcam ab290	embryonic	Myb-SANT	4050		2018
16	FBgn0015904	ara	ara	ara-GFP	Kevin White goat-anti-GFP-UC	embryonic	HD	5483		2018
17	FBgn0035407	Asciz	Asciz	CG14962-GFP	Kevin White goat-anti-GFP-UC	embryonic	ZF C2H2	4119		2018
18	FBgn0000137	ase	ase	ase-GFP	Kevin White goat-anti-GFP-UC	embryonic	bHLH	4209		2018
19	FBgn0039946	ATbp	ATbp	ATbp-GFP	Kevin White goat-anti-GFP-UC	embryonic	ZF C2H2	4292		2018
20	FBgn0265193	Atf-2	Atf-2	Atf-2-GFP	Kevin White goat-anti-GFP-UC	embryonic	bZIP	2980		2018
21	FBgn0028550	Atf3	Atf3	A3-3-GFP	Kevin White goat-anti-GFP-UC	embryonic	bZIP	2519		2018
22	FBgn0033010	Atf6	Atf6	Atf6-GFP	Kevin White goat-anti-GFP-UC	embryonic	bZIP	5846		2018
23	FBgn0010433	ato	ato	ato-GFP	Abcam ab290	embryonic	bHLH	3357		2018
24	FBgn0013751	Awh	Awh	Awh-GFP	Kevin White goat-anti-GFP-UC	embryonic	HD LIM	5814		2018
25	FBgn0025185	az2	az2	az2-GFP	Kevin White goat-anti-GFP-UC	embryonic	MADF ZF C2H2	4878		2018
28	FBgn0004870	bab1	bab1	bab1-RA_(bab1-s)-GFP	Kevin White goat-anti-GFP-UC	adult	HTH	9473		2018
29	FBgn0025525	bab2	bab2	bab2-GFP	Kevin White goat-anti-GFP-UC	embryonic	HTH	3674		2018
30	FBgn0004862	bap	bap	bap-GFP	Abcam ab290	embryonic	HD	4890		2018
31	FBgn0024251	bbx	bbx	bbx-GFP	Abcam ab290	embryonic	HMG box	5799		2018
32	FBgn0000166	bcd	bcd	1T-GFP	Kevin White goat-anti-GFP-UC	embryonic	HD HOX	4728		2018
33	FBgn0032512	Bdp1	Bdp1	CG9305-GFP	Kevin White goat-anti-GFP-UC	embryonic	Myb	3339		2018
26	FBgn0011758	B-H1	B-H1	B-H1-GFP	Kevin White goat-anti-GFP-UC	embryonic	HD	3467		2018
27	FBgn0004854	B-H2	B-H2	B-H2-GFP	Kevin White goat-anti-GFP-UC	embryonic	HD	3862		2018
34	FBgn0039509	bigmax	bigmax	bigmax-GFP	Kevin White goat-anti-GFP-UC	embryonic	bHLH	2029		2018
35	FBgn0045759	bin	bin	bin-GFP	Abcam ab290	embryonic	Fork-head	3424		2018
36	FBgn0035625	Blimp-1	Blimp-1	Blimp-1-GFP	Kevin White goat-anti-GFP-UC	embryonic	ZF C2H2 SET	12832		2018
37	FBgn0035625	Blimp-1	Blimp-1	Blimp-1-GFP	Kevin White goat-anti-GFP-UC	prepupa	ZF C2H2 SET	6497		2018
38	FBgn0053213	Boh1	CG33213	CG33213-GFP	Kevin White goat-anti-GFP-UC	embryonic	ZF C2H2	4884		2018
39	FBgn0004893	bowl	bowl	bowl-GFP	Kevin White goat-anti-GFP-UC	embryonic	ZF C2H2	2198		2018
40	FBgn0283451	br	br	br-re-GFP	Kevin White goat-anti-GFP-UC	wandering third instar larva	ZF C2H2	1841		2018
41	FBgn0283451	br	br	br-rj-GFP	Kevin White goat-anti-GFP-UC	wandering third instar larva	ZF C2H2	6964		2018
42	FBgn0283451	br	br	yellow cinnabar brown speck	non-commercial br modENCODE antibody 1	embryonic	ZF C2H2	1021		2018
43	FBgn0024250	brk	brk	brk-GFP	Kevin White goat-anti-GFP-UC	wandering third instar larva	Brinker	6685		2018
44	FBgn0032130	brwl	CG3838	CG3838-GFP	Kevin White goat-anti-GFP-UC	embryonic	MADF BESS	1682		2018
45	FBgn0004101	bs	bs	bs-GFP	Abcam ab290	embryonic	MADS box	3203		2018
46	FBgn0000529	bsh	bsh	bsh-GFP	Kevin White goat-anti-GFP-UC	embryonic	HD	10656		2018
47	FBgn0000529	bsh	bsh	bsh-GFP	Kevin White goat-anti-GFP-UC	embryonic	HD	5894		2018
48	FBgn0263108	BtbVII	BtbVII	BtbVII-GFP	Kevin White goat-anti-GFP-UC	embryonic	HTH	3131		2018
49	FBgn0014949	btn	btn	btn-GFP	Kevin White goat-anti-GFP-UC	embryonic	HD	1785		2018
50	FBgn0032600	BuGZ	BuGZ	CG17912-GFP	Kevin White goat-anti-GFP-UC	embryonic	ZF BED	1390		2018
51	FBgn0004863	C15	C15	C15-GFP	Kevin White goat-anti-GFP-UC	embryonic	HD	2265		2018
52	FBgn0000251	cad	cad	Cad-GFP-7T	Anthony Hyman non-commercial eGFP modENCODE antibody 1	embryonic	HD HOX	2237		2018
53	FBgn0287478	Camta	Camta	Camta-MiMIC-GFP	Kevin White goat-anti-GFP-UC	embryonic	CG-1	3245		2018
54	FBgn0004878	cas	cas	cas-GFP	Kevin White goat-anti-GFP-UC	embryonic	ZF C2H2	2237		2018
55	FBgn0024249	cato	cato	cato-GFP	Kevin White goat-anti-GFP-UC	embryonic	bHLH	2466		2018
56	FBgn0015919	caup	caup	caup-GFP	Kevin White goat-anti-GFP-UC	embryonic	HD	5220		2018
57	FBgn0043364	cbt	cbt	cbt-GFP	Kevin White goat-anti-GFP-UC	embryonic	ZF C2H2	4724		2018
58	FBgn0000286	Cf2	Cf2	Cf2-GFP	Abcam ab290	embryonic	ZF C2H2	3253		2018
59	FBgn0000289	cg	cg	cg-GFP	Kevin White goat-anti-GFP-UC	embryonic	ZF C2H2	16984		2018
60	FBgn0035702	CG10147	CG10147	CG10147-GFP	Kevin White goat-anti-GFP-UC	embryonic	ZF C2H2	4261		2018
61	FBgn0033971	CG10209	CG10209	CG10209-GFP	Kevin White goat-anti-GFP-UC	embryonic	BESS	4854		2018
62	FBgn0027514	CG1024	CG1024	CG1024-GFP	Kevin White goat-anti-GFP-UC	embryonic	ZF C2H2	3992		2018
63	FBgn0035690	CG10274	CG10274	CG10274-GFP	Kevin White goat-anti-GFP-UC	embryonic	ZF C2H2	2214		2018
64	FBgn0034643	CG10321	CG10321	CG10321-GFP	Kevin White goat-anti-GFP-UC	embryonic	ZF C2H2	3468		2018
65	FBgn0032707	CG10348	CG10348	CG10348-GFP	Kevin White goat-anti-GFP-UC	pupa	ZF C2H2	1934		2018
66	FBgn0032814	CG10366	CG10366	CG10366-GFP	Kevin White goat-anti-GFP-UC	embryonic	ZF C2H2	5153		2018
67	FBgn0032730	CG10431	CG10431	CG10431-GFP	Kevin White goat-anti-GFP-UC	embryonic	ZF C2H2, ZF THAP	3867		2018
68	FBgn0032815	CG10462	CG10462	CG10462-GFP	Kevin White goat-anti-GFP-UC	embryonic	ZF C2H2	2724		2018
69	FBgn0034570	CG10543	CG10543	CG10543-GFP	Kevin White goat-anti-GFP-UC	embryonic	ZF C2H2	5672		2018
70	FBgn0032817	CG10631	CG10631	CG10631-GFP	Kevin White goat-anti-GFP-UC	prepupa	ZF C2H2, ZF THAP	12047		2018
71	FBgn0036294	CG10654	CG10654	CG10654-GFP	Kevin White goat-anti-GFP-UC	embryonic	ZF C2H2	3766		2018
72	FBgn0039329	CG10669	CG10669	CG10669-GFP	Kevin White goat-anti-GFP-UC	prepupa	ZF C2H2	7532		2018
73	FBgn0032858	CG10949	CG10949	CG10949-GFP	Abcam ab290	embryonic	MADF	4592		2018
74	FBgn0030010	CG10959	CG10959	CG10959-GFP	Kevin White goat-anti-GFP-UC	embryonic	ZF C2H2	3434		2018
75	FBgn0037379	CG10979	CG10979	CG10979-GFP	Kevin White goat-anti-GFP-UC	embryonic	ZF C2H2	11873		2018
76	FBgn0030408	CG11085	CG11085	CG11085-GFP	Kevin White goat-anti-GFP-UC	embryonic	HD	3170		2018
77	FBgn0037120	CG11247	CG11247	CG11247-GFP	Kevin White goat-anti-GFP-UC	embryonic	ZF C2H2	4495		2018
78	FBgn0030058	CG11294	CG11294	CG11294-GFP	Kevin White goat-anti-GFP-UC	prepupa	HD	4330		2018
79	FBgn0040366	CG11398	CG11398	CG11398-GFP	Kevin White goat-anti-GFP-UC	embryonic	ZF C2H2	2752		2018
80	FBgn0037031	CG11456	CG11456	CG11456-GFP	Kevin White goat-anti-GFP-UC	embryonic	ZF C2H2	6683		2018
81	FBgn0039733	CG11504	CG11504	CG11504-GFP	Kevin White goat-anti-GFP-UC	embryonic	MADF	13689		2018
82	FBgn0036249	CG11560	CG11560	CG11560-GFP	Kevin White goat-anti-GFP-UC	embryonic	ZF BED	3351		2018
83	FBgn0031232	CG11617	CG11617	CG11617-GFP	Kevin White goat-anti-GFP-UC	adult	HD	9757		2018
84	FBgn0030316	CG11695	CG11695	CG11695-GFP	Kevin White goat-anti-GFP-UC	embryonic	ZF C2H2	5976		2018
85	FBgn0030314	CG11696	CG11696	CG11696-GFP	Kevin White goat-anti-GFP-UC	embryonic	ZF C2H2	3752		2018
86	FBgn0031391	CG11723	CG11723	CG11723-GFP	Kevin White goat-anti-GFP-UC	embryonic	MADF BESS	3331		2018
87	FBgn0028647	CG11902	CG11902	CG11902-GFP	Kevin White goat-anti-GFP-UC	prepupa	ZF C2H2	4552		2018
88	FBgn0034425	CG11906	CG11906	CG11906-GFP	Abcam ab290	embryonic	ZF C2H2	8949		2018
89	FBgn0039808	CG12071	CG12071	CG12071-GFP	Kevin White goat-anti-GFP-UC	embryonic	ZF C2H2	6098		2018
90	FBgn0035238	CG12104	CG12104	CG12104-GFP	Kevin White goat-anti-GFP-UC	embryonic	HMG box	2494		2018
91	FBgn0029957	CG12155	CG12155	CG12155-GFP	Kevin White goat-anti-GFP-UC	embryonic	MADF	5249		2018
92	FBgn0043796	CG12219	CG12219	CG12219-GFP	Kevin White goat-anti-GFP-UC	embryonic	ZF C2H2	3904		2018
93	FBgn0029822	CG12236	CG12236	CG12236-GFP	Kevin White goat-anti-GFP-UC	embryonic	ZF C2H2	2471		2018
94	FBgn0032295	CG12299	CG12299	CG12299-GFP	Kevin White goat-anti-GFP-UC	embryonic	ZF C2H2	2562		2018
95	FBgn0035137	CG1233	CG1233	CG1233-GFP	Kevin White goat-anti-GFP-UC	embryonic	ZF C2H2	4738		2018
96	FBgn0033581	CG12391	CG12391	CG12391-GFP	Kevin White goat-anti-GFP-UC	embryonic	ZF C2H2	11300		2018
97	FBgn0035481	CG12605	CG12605	CG12605-GFP	Kevin White goat-anti-GFP-UC	pupa	ZF C2H2	7010		2018
98	FBgn0033459	CG12744	CG12744	CG12744-GFP	Kevin White goat-anti-GFP-UC	embryonic	ZF C2H2	3142		2018
99	FBgn0037206	CG12768	CG12768	CG12768-GFP	Kevin White goat-anti-GFP-UC	adult	MADF	3069		2018
100	FBgn0033252	CG12769	CG12769	CG12769-GFP	Kevin White goat-anti-GFP-UC	embryonic	ZF C2H2	14692		2018
101	FBgn0033569	CG12942	CG12942	CG12942-GFP	Kevin White goat-anti-GFP-UC	embryonic	ZF C2H2	3692		2018
102	FBgn0032150	CG13123	CG13123	CG13123-GFP	Kevin White goat-anti-GFP-UC	embryonic	ZF C2H2	4252		2018
103	FBgn0033627	CG13204	CG13204	CG13204-GFP	Kevin White goat-anti-GFP-UC	pupa	MADF BESS	11163		2018
104	FBgn0035643	CG13287	CG13287	CG13287-GFP	Abcam ab290	embryonic	ZF C2H2	7031		2018
105	FBgn0031874	CG13775	CG13775	CG13775-GFP	Kevin White goat-anti-GFP-UC	embryonic	ZF BED	5172		2018
106	FBgn0035157	CG13894	CG13894	CG13894-GFP	Kevin White goat-anti-GFP-UC	embryonic	ZF THAP HTH	9910		2018
107	FBgn0031718	CG14014	CG14014	CG14014-GFP	Kevin White goat-anti-GFP-UC	embryonic		5675		2018
108	FBgn0040392	CG14050	CG14050	CG14050-GFP	Kevin White goat-anti-GFP-UC	embryonic	ZF BED	3534		2018
109	FBgn0029895	CG14441	CG14441	CG14441-GFP	Kevin White goat-anti-GFP-UC	embryonic	ZF C2H2	5823		2018
110	FBgn0037275	CG14655	CG14655	CG14655-GFP	Kevin White goat-anti-GFP-UC	pupa	ZF C2H2	9717		2018
111	FBgn0037317	CG14667	CG14667	CG14667-GFP	Kevin White goat-anti-GFP-UC	embryonic	ZF C2H2	3552		2018
112	FBgn0037920	CG14710	CG14710	CG14710-GFP	Kevin White goat-anti-GFP-UC	embryonic	ZF C2H2	13399		2018
113	FBgn0037922	CG14711	CG14711	CG14711-GFP	Kevin White goat-anti-GFP-UC	adult	ZF C2H2	3897		2018
114	FBgn0038273	CG14860	CG14860	CG14860-GFP	Abcam ab290	embryonic	ZF THAP	3816		2018
115	FBgn0035414	CG14965	CG14965	CG14965-GFP	Kevin White goat-anti-GFP-UC	embryonic	ZF THAP	1209		2018
116	FBgn0035518	CG15011	CG15011	CG15011-GFP	Kevin White goat-anti-GFP-UC	embryonic	NF-X1	5026		2018
117	FBgn0034379	CG15073	CG15073	CG15073-GFP	Kevin White goat-anti-GFP-UC	embryonic	ZF C2H2	1065		2018
118	FBgn0028878	CG15269	CG15269	CG15269-GFP	Kevin White goat-anti-GFP-UC	embryonic	ZF C2H2	9404		2018
119	FBgn0031144	CG1529	CG1529	CG1529-GFP	Kevin White goat-anti-GFP-UC	embryonic	ZF C2H2	3686		2018
120	FBgn0030009	CG15336	CG15336	CG15336-GFP	Kevin White goat-anti-GFP-UC	prepupa	ZF C2H2	10787		2018
121	FBgn0039712	CG15514	CG15514	CG15514-GFP	Kevin White goat-anti-GFP-UC	embryonic	ZF BED	6758		2018
122	FBgn0030673	CG15601	CG15601	CG15601-GFP	Kevin White goat-anti-GFP-UC	embryonic	MADF	6971		2018
123	FBgn0038833	CG15696	CG15696	CG15696-GFP	Kevin White goat-anti-GFP-UC	embryonic	HD	4757		2018
124	FBgn0034120	CG15710	CG15710	CG15710-GFP	Kevin White goat-anti-GFP-UC	pupa	ZF C2H2	11457		2018
125	FBgn0035405	CG15812	CG15812	CG15812-GFP	Kevin White goat-anti-GFP-UC	embryonic	HTH	2631		2018
126	FBgn0033186	CG1602	CG1602	CG1602-GFP	Kevin White goat-anti-GFP-UC	embryonic	MADF ZF C2H2	3994		2018
127	FBgn0033185	CG1603	CG1603	CG1603-GFP	Kevin White goat-anti-GFP-UC	embryonic	MADF ZF C2H2	10086		2018
128	FBgn0033183	CG1620	CG1620	CG1620-GFP	Kevin White goat-anti-GFP-UC	adult	SANT	3000		2018
129	FBgn0039602	CG1647	CG1647	CG1647-GFP	Kevin White goat-anti-GFP-UC	embryonic	ZF C2H2	2864		2018
130	FBgn0033449	CG1663	CG1663	CG1663-GFP	Kevin White goat-anti-GFP-UC	pupa	ZF C2H2	12580		2018
131	FBgn0037698	CG16779	CG16779	CG16779-GFP	Kevin White goat-anti-GFP-UC	embryonic	ZF C2H2	2705		2018
132	FBgn0037698	CG16779	CG16779	CG16779-MiMIC-GFP	Kevin White goat-anti-GFP-UC	prepupa	ZF C2H2	9697		2018
133	FBgn0032490	CG16813	CG16813	CG16813-GFP	Abcam ab290	embryonic	bZIP	5365		2018
134	FBgn0032491	CG16815	CG16815	CG16815-GFP	Kevin White goat-anti-GFP-UC	embryonic	bZIP	3317		2018
135	FBgn0028931	CG16863	CG16863	CG16863-GFP	Kevin White goat-anti-GFP-UC	embryonic	ZF BED	3592		2018
136	FBgn0038741	CG17186	CG17186	CG17186-GFP	Kevin White goat-anti-GFP-UC	embryonic	ZF C2H2	2915		2018
137	FBgn0028895	CG17328	CG17328	CG17328-GFP	Kevin White goat-anti-GFP-UC	embryonic	ZF C2H2	6152		2018
138	FBgn0036396	CG17359	CG17359	CG17359-GFP	Kevin White goat-anti-GFP-UC	embryonic	ZF C2H2	9524		2018
139	FBgn0036395	CG17361	CG17361	CG17361-GFP	Kevin White goat-anti-GFP-UC	embryonic	ZF C2H2	8878		2018
140	FBgn0033934	CG17385	CG17385	CG17385-GFP	Kevin White goat-anti-GFP-UC	embryonic	ZF C2H2	6084		2018
141	FBgn0032763	CG17568	CG17568	CG17568-GFP	Kevin White goat-anti-GFP-UC	embryonic	ZF C2H2	5650		2018
142	FBgn0031597	CG17612	CG17612	CG17612-GFP	Kevin White goat-anti-GFP-UC	embryonic	ZF C2H2	2263		2018
143	FBgn0038550	CG17801	CG17801	CG17801-GFP	Kevin White goat-anti-GFP-UC	adult	ZF C2H2	5369		2018
144	FBgn0038548	CG17806	CG17806	CG17806-GFP	Kevin White goat-anti-GFP-UC	pupa	ZF C2H2	10568		2018
145	FBgn0039860	CG1792	CG1792	CG1792-GFP	Kevin White goat-anti-GFP-UC	embryonic	ZF C2H2	2958		2018
146	FBgn0033491	CG18011	CG18011	CG18011-GFP	Kevin White goat-anti-GFP-UC	embryonic	ZF C2H2	2620		2018
147	FBgn0030012	CG18262	CG18262	CG18262-GFP	Kevin White goat-anti-GFP-UC	embryonic	ZF C2H2	12795		2018
148	FBgn0037931	CG18476	CG18476	CG18476-GFP	Kevin White goat-anti-GFP-UC	embryonic	ZF C2H2	2932		2018
149	FBgn0038592	CG18599	CG18599	CG18599-GFP	Kevin White goat-anti-GFP-UC	embryonic	HD	10966		2018
150	FBgn0042205	CG18764	CG18764	CG18764-GFP	Kevin White goat-anti-GFP-UC	embryonic	ZF C2H2	3685		2018
151	FBgn0030003	CG2116	CG2116	CG2116-GFP	Kevin White goat-anti-GFP-UC	embryonic	ZF C2H2	5867		2018
152	FBgn0030005	CG2120	CG2120	CG2120-GFP	Kevin White goat-anti-GFP-UC	embryonic	ZF C2H2	9274		2018
153	FBgn0030008	CG2129	CG2129	CG2129-GFP	Abcam ab290	embryonic	ZF C2H2	2067		2018
154	FBgn0030240	CG2202	CG2202	CG2202-GFP	Kevin White goat-anti-GFP-UC	embryonic	ZF C2H2	4915		2018
155	FBgn0024975	CG2712	CG2712	CG2712-GFP	Kevin White goat-anti-GFP-UC	embryonic	ZF C2H2	10848		2018
156	FBgn0030206	CG2889	CG2889	CG2889-GFP	Kevin White goat-anti-GFP-UC	embryonic	ZF C2H2	3145		2018
157	FBgn0050020	CG30020	CG30020	CG30020-GFP	Kevin White goat-anti-GFP-UC	embryonic	ZF C2H2	8926		2018
158	FBgn0029928	CG3032	CG3032	CG3032-GFP	Kevin White goat-anti-GFP-UC	prepupa	ZF C2H2	9450		2018
159	FBgn0050403	CG30403	CG30403	CG30403-GFP	Kevin White goat-anti-GFP-UC	embryonic	MADF BESS	7949		2018
160	FBgn0050431	CG30431	CG30431	CG30431-GFP	Kevin White goat-anti-GFP-UC	embryonic	ZF C2H2	3478		2018
161	FBgn0034946	CG3065	CG3065	CG3065-GFP	Kevin White goat-anti-GFP-UC	embryonic	ZF C2H2	2453		2018
162	FBgn0051224	CG31224	CG31224	CG31224-GFP	Kevin White goat-anti-GFP-UC	embryonic	ZF C2H2	3815		2018
163	FBgn0051365	CG31365	CG31365	CG31365-GFP	Kevin White goat-anti-GFP-UC	embryonic	ZF C2H2	2664		2018
164	FBgn0051388	CG31388	CG31388	CG31388-GFP	Kevin White goat-anti-GFP-UC	embryonic	ZF C2H2	1615		2018
165	FBgn0051441	CG31441	CG31441	CG31441-GFP	Kevin White goat-anti-GFP-UC	embryonic	ZF C2H2	7408		2018
166	FBgn0051627	CG31627	CG31627	CG31627-GFP	Kevin White goat-anti-GFP-UC	prepupa	MADF	7241		2018
167	FBgn0034961	CG3163	CG3163	CG3163-GFP	Kevin White goat-anti-GFP-UC	embryonic	MADF	4826		2018
168	FBgn0052006	CG32006	CG32006	CG32006-GFP	Kevin White goat-anti-GFP-UC	prepupa	Fork-head	11463		2018
169	FBgn0052121	CG32121	CG32121	CG32121-GFP	Kevin White goat-anti-GFP-UC	pupa	ZF C2H2	8452		2018
170	FBgn0052532	CG32532	CG32532	CG32532-GFP	Kevin White goat-anti-GFP-UC	embryonic	HD	7718		2018
171	FBgn0052767	CG32767	CG32767	CG32767-GFP	Kevin White goat-anti-GFP-UC	embryonic	ZF C2H2	4636		2018
172	FBgn0052772	CG32772	CG32772	CG32772-GFP	Kevin White goat-anti-GFP-UC	embryonic	ZF C2H2	5088		2018
173	FBgn0260741	CG3281	CG3281	CG3281-GFP	Kevin White goat-anti-GFP-UC	embryonic	ZF C2H2	6181		2018
174	FBgn0053017	CG33017	CG33017	CG33017-GFP	Kevin White goat-anti-GFP-UC	adult	MADF	3403		2018
175	FBgn0053557	CG33557	CG33557	CG33557-GFP	Kevin White goat-anti-GFP-UC	embryonic	bHLH	4892		2018
176	FBgn0031573	CG3407	CG3407	CG3407-GFP	Kevin White goat-anti-GFP-UC	embryonic	ZF C2H2	3423		2018
177	FBgn0085253	CG34224	CG34224	CG34224-GFP	Abcam ab290	embryonic	NFYA	4958		2018
178	FBgn0085396	CG34367	CG34367	CG34367-GFP	Kevin White goat-anti-GFP-UC	pupa	HD	5884		2018
179	FBgn0085405	CG34376	CG34376	CG34376-GFP	Kevin White goat-anti-GFP-UC	embryonic	ZF C2H2	8352		2018
180	FBgn0029824	CG3726	CG3726	CG3726-GFP	Kevin White goat-anti-GFP-UC	embryonic	HTH	3204		2018
181	FBgn0029867	CG3847	CG3847	CG3847-GFP	Kevin White goat-anti-GFP-UC	embryonic	ZF C2H2	6174		2018
182	FBgn0036423	CG3919	CG3919	CG3919-GFP	Kevin White goat-anti-GFP-UC	prepupa	MADF BESS	8846		2018
183	FBgn0038472	CG3995	CG3995	CG3995-GFP	Kevin White goat-anti-GFP-UC	embryonic	ZF BED	3752		2018
184	FBgn0261679	CG42726	CG42726	CG42726-GFP	Abcam ab290	embryonic	ZF C2H2	4044		2018
185	FBgn0261705	CG42741	CG42741	CG42741-GFP	Abcam ab290	embryonic	ZF C2H2	9191		2018
186	FBgn0034114	CG4282	CG4282	CG4282-GFP	Kevin White goat-anti-GFP-UC	embryonic	ZF C2H2	2154		2018
187	FBgn0030455	CG4318	CG4318	CG4318-GFP	Kevin White goat-anti-GFP-UC	prepupa	ZF C2H2	7776		2018
188	FBgn0036274	CG4328	CG4328	CG4328-GFP	Kevin White goat-anti-GFP-UC	embryonic	HD LIM	2704		2018
189	FBgn0263072	CG43347	CG43347	CG9817-GFP	Kevin White goat-anti-GFP-UC	embryonic	ZF C2H2	4766		2018
190	FBgn0038787	CG4360	CG4360	CG4360-GFP	Kevin White goat-anti-GFP-UC	embryonic	ZF C2H2	6198		2018
191	FBgn0263772	CG43689	CG43689	CG43689-GFP	Kevin White goat-anti-GFP-UC	embryonic	ZF C2H2	2088		2018
192	FBgn0264744	CG44002	CG44002	CG34406-GFP	Kevin White goat-anti-GFP-UC	prepupa	ZF C2H2	7493		2018
193	FBgn0030432	CG4404	CG4404	CG4404-GFP	Kevin White goat-anti-GFP-UC	embryonic	MADF BESS	3892		2018
194	FBgn0038765	CG4424	CG4424	CG4424-GFP	Kevin White goat-anti-GFP-UC	embryonic	ZF C2H2	5169		2018
195	FBgn0031894	CG4496	CG4496	CG4496-GFP	Kevin White goat-anti-GFP-UC	pupa	ZF C2H2	12734		2018
196	FBgn0266441	CG45071	CTPsyn	CG6854-GFP	Kevin White goat-anti-GFP-UC	embryonic	MADF BESS	2327		2018
197	FBgn0266441	CG45071	CTPsyn	CG6854-GFP	Kevin White goat-anti-GFP-UC	prepupa	MADF BESS	7496		2018
198	FBgn0029936	CG4617	CG4617	CG4617-GFP	Kevin White goat-anti-GFP-UC	embryonic	HMG box	4536		2018
199	FBgn0035036	CG4707	CG4707	CG4707-GFP	Kevin White goat-anti-GFP-UC	embryonic	ZF C2H2	3513		2018
200	FBgn0039355	CG4730	CG4730	CG4730-GFP	Kevin White goat-anti-GFP-UC	embryonic	ZF C2H2	3571		2018
201	FBgn0037876	CG4820	CG4820	CG4820-GFP	Kevin White goat-anti-GFP-UC	embryonic	ZF C2H2	3902		2018
202	FBgn0038766	CG4854	CG4854	CG4854-GFP	Kevin White goat-anti-GFP-UC	embryonic	ZF C2H2	3796		2018
203	FBgn0043457	CG5180	CG5180	CG5180-GFP	Kevin White goat-anti-GFP-UC	embryonic	MADF	5309		2018
204	FBgn0038047	CG5245	CG5245	CG5245-GFP	Kevin White goat-anti-GFP-UC	embryonic	ZF C2H2	3523		2018
205	FBgn0032587	CG5953	CG5953	CG5953-GFP	Kevin White goat-anti-GFP-UC	embryonic	MADF	3305		2018
206	FBgn0036155	CG6163	CG6163	CG6163-GFP	Kevin White goat-anti-GFP-UC	prepupa	MADF	12445		2018
207	FBgn0037794	CG6254	CG6254	CG6254-GFP	Kevin White goat-anti-GFP-UC	embryonic	ZF C2H2	2714		2018
208	FBgn0038316	CG6276	CG6276	CG6276-GFP	Kevin White goat-anti-GFP-UC	prepupa	MADF BESS	8036		2018
209	FBgn0038301	CG6654	CG6654	CG6654-GFP	Kevin White goat-anti-GFP-UC	embryonic	ZF C2H2	2130		2018
210	FBgn0035902	CG6683	CG6683	CG6683-GFP	Kevin White goat-anti-GFP-UC	embryonic	MADF	3725		2018
211	FBgn0037877	CG6689	CG6689	CG6689-GFP	Kevin White goat-anti-GFP-UC	embryonic	ZF C2H2, ZF THAP	6455		2018
212	FBgn0035903	CG6765	CG6765	CG6765-GFP	Kevin White goat-anti-GFP-UC	embryonic	ZF C2H2	2004		2018
213	FBgn0037918	CG6791	CG6791	CG6791-GFP	Abcam ab290	embryonic	ZF C2H2	6091		2018
214	FBgn0037923	CG6813	CG6813	CG6813-GFP	Kevin White goat-anti-GFP-UC	embryonic	ZF C2H2	3811		2018
215	FBgn0030963	CG7101	CG7101	CG7101-GFP	Kevin White goat-anti-GFP-UC	adult	ZF C2H2	6199		2018
216	FBgn0036791	CG7271	CG7271	CG7271-GFP	Kevin White goat-anti-GFP-UC	embryonic	ZF C2H2	1640		2018
217	FBgn0036179	CG7368	CG7368	CG7368-GFP	Kevin White goat-anti-GFP-UC	prepupa	ZF C2H2	5612		2018
218	FBgn0038626	CG7691	CG7691	CG7691-GFP	Abcam ab290	prepupa	ZF C2H2	3213		2018
219	FBgn0033616	CG7745	CG7745	CG7745-GFP	Kevin White goat-anti-GFP-UC	embryonic	MADF	3049		2018
220	FBgn0034096	CG7786	CG7786	CG7786-GFP	Kevin White goat-anti-GFP-UC	embryonic	bZIP	3720		2018
221	FBgn0037584	CG7963	CG7963	CG7963-GFP	Abcam ab290	embryonic	ZF C2H2	3351		2018
222	FBgn0038244	CG7987	CG7987	CG7987-GFP	Kevin White goat-anti-GFP-UC	embryonic	ZF C2H2	6727		2018
223	FBgn0033993	CG8089	CG8089	CG8089-GFP	Kevin White goat-anti-GFP-UC	embryonic	ZF C2H2	3164		2018
224	FBgn0030664	CG8119	CG8119	CG8119-GFP	Kevin White goat-anti-GFP-UC	prepupa	MADF BESS	10603		2018
225	FBgn0037619	CG8159	CG8159	CG8159-GFP	Kevin White goat-anti-GFP-UC	pupa	ZF C2H2	12652		2018
226	FBgn0035824	CG8281	CG8281	CG8281-GFP	Kevin White goat-anti-GFP-UC	embryonic	MADF	4100		2018
227	FBgn0037717	CG8301	CG8301	CG8301-GFP	Kevin White goat-anti-GFP-UC	pupa	ZF C2H2	10685		2018
228	FBgn0037722	CG8319	CG8319	CG8319-GFP	Kevin White goat-anti-GFP-UC	prepupa	ZF C2H2	4203		2018
229	FBgn0034062	CG8388	CG8388	CG8388-GFP	Kevin White goat-anti-GFP-UC	embryonic	ZF C2H2	6096		2018
230	FBgn0037746	CG8478	CG8478	CG8478-GFP	Abcam ab290	embryonic	ZF C2H2	3151		2018
231	FBgn0037746	CG8478	CG8478	Oregon-R	non-commercial CG8478 modENCODE antibody 1	unknown	ZF C2H2	1556		2018
232	FBgn0037746	CG8478	CG8478	yellow cinnabar brown speck	non-commercial CG8478 modENCODE antibody 1	embryonic	ZF C2H2	1842		2018
233	FBgn0037746	CG8478	CG8478	yellow cinnabar brown speck	non-commercial CG8478 modENCODE antibody 1	prepupa	ZF C2H2	253		2018
234	FBgn0036900	CG8765	CG8765	CG8765-GFP	Kevin White goat-anti-GFP-UC	embryonic	MADF	2877		2018
235	FBgn0030710	CG8924	CG8924	CG8924-GFP	Kevin White goat-anti-GFP-UC	embryonic	HTH	12824		2018
236	FBgn0030680	CG8944	CG8944	CG8944-GFP	Kevin White goat-anti-GFP-UC	embryonic	MADF ZF C2H2	3238		2018
237	FBgn0030659	CG9215	CG9215	CG9215-GFP	Kevin White goat-anti-GFP-UC	embryonic	ZF C2H2	4098		2018
238	FBgn0030787	CG9609	CG9609	CG9609-GFP	Kevin White goat-anti-GFP-UC	embryonic	ZF C2H2	3477		2018
239	FBgn0037445	CG9727	CG9727	CG9727-GFP	Kevin White goat-anti-GFP-UC	embryonic	RFX	7079		2018
240	FBgn0034821	CG9876	CG9876	CG9876-GFP	Kevin White goat-anti-GFP-UC	embryonic	HD	2272		2018
241	FBgn0262160	CG9932	CG9932	CG9932-GFP	Kevin White goat-anti-GFP-UC	embryonic	ZF C2H2	7328		2018
242	FBgn0035721	CG9948	CG9948	CG9948-GFP	Kevin White goat-anti-GFP-UC	pupa	MADF	9361		2018
243	FBgn0029504	CHES-1-like	CHES-1-like	CHES-1-like-GFP	Kevin White goat-anti-GFP-UC	embryonic	Fork-head	3583		2018
244	FBgn0086758	chinmo	chinmo	chinmo-GFP	Abcam ab290	embryonic	ZF C2H2	13848		2018
245	FBgn0015371	chn	chn	chn-GFP	Kevin White goat-anti-GFP-UC	embryonic	ZF C2H2	3845		2018
246	FBgn0004859	ci	ci	ci-GFP	Kevin White goat-anti-GFP-UC	embryonic	ZF C2H2	10662		2018
247	FBgn0262582	cic	cic	cic-GFP	Kevin White goat-anti-GFP-UC	adult	HMG box	10576		2018
248	FBgn0015025	CkIIalpha-i1	CkIIŒ±-i1	CkIIŒ±-i1-GFP	Kevin White goat-anti-GFP-UC	embryonic	ZF C2H2	944		2018
249	FBgn0032979	Clamp	Clamp	CG1832-GFP	Kevin White goat-anti-GFP-UC	embryonic	ZF C2H2	6597		2018
250	FBgn0023076	Clk	Clk	Clk-GFP	Kevin White goat-anti-GFP-UC	adult	bHLH	1486		2018
251	FBgn0262975	cnc	cnc	cnc-GFP	Kevin White goat-anti-GFP-UC	wandering third instar larva	bZIP	3620		2018
252	FBgn0262975	cnc	cnc	yellow cinnabar brown speck	KW0-CNC	adult	bZIP	3884		2018
253	FBgn0262975	cnc	cnc	yellow cinnabar brown speck	KW0-CNC	adult	bZIP	635		2018
254	FBgn0263240	Coop	Coop	CG1621-GFP	Kevin White goat-anti-GFP-UC	prepupa	MADF BESS	8200		2018
255	FBgn0261573	CoRest	CoRest	CoRest-GFP	Kevin White goat-anti-GFP-UC	embryonic	SANT	8848		2018
256	FBgn0000370	crc	crc	crc-MiMIC-GFP	Kevin White goat-anti-GFP-UC	embryonic	bZIP	1932		2018
257	FBgn0004396	CrebA	CrebA	CrebA-MiMIC-GFP	Kevin White goat-anti-GFP-UC	wandering third instar larva	bZIP	6302		2018
258	FBgn0265784	CrebB	CrebB	CrebB-GFP	Kevin White goat-anti-GFP-UC	embryonic	bZIP	2827		2018
259	FBgn0021738	Crg-1	Crg-1	Crg-1-GFP	Kevin White goat-anti-GFP-UC	adult	Fork-head	2147		2018
260	FBgn0014143	croc	croc	croc-GFP	Kevin White goat-anti-GFP-UC	embryonic	Fork-head	3650		2018
261	FBgn0020309	crol	crol	crol-GFP	Kevin White goat-anti-GFP-UC	embryonic	ZF C2H2	10064		2018
262	FBgn0001994	crp	crp	crp-GFP	Kevin White goat-anti-GFP-UC	embryonic	bHLH	6341		2018
263	FBgn0001994	crp	crp	crp-GFP	Kevin White goat-anti-GFP-UC	embryonic	bHLH	1093		2018
264	FBgn0035769	CTCF	CTCF	CTCF-GFP	Kevin White goat-anti-GFP-UC	embryonic	ZF C2H2	4935		2018
265	FBgn0035769	CTCF	CTCF	Oregon-R	non-commercial CTCF modENCODE antibody 2	embryonic	ZF C2H2	4289		2018
266	FBgn0035769	CTCF	CTCF	Oregon-R	non-commercial CTCF modENCODE antibody 2	embryonic	ZF C2H2	3611		2018
267	FBgn0259938	cwo	cwo	cwo-GFP	Kevin White goat-anti-GFP-UC	embryonic	bHLH	9405		2018
268	FBgn0023094	cyc	cyc	cyc-GFP	Kevin White goat-anti-GFP-UC	prepupa	bHLH	6929		2018
269	FBgn0000411	D	D	D-GFP	Kevin White goat-anti-GFP-UC	embryonic	HMG box	4204		2018
270	FBgn0000411	D	D	yellow cinnabar brown speck	Aviva-KW3-D-D2	embryonic	HMG box	892		2018
271	FBgn0000412	D1	D1	D1-GFP	Kevin White goat-anti-GFP-UC	pupa	AT hook	5778		2018
272	FBgn0022935	D19A	D19A	D19A-GFP	Kevin White goat-anti-GFP-UC	embryonic	ZF C2H2	11315		2018
273	FBgn0022699	D19B	D19B	D19B-GFP	Kevin White goat-anti-GFP-UC	embryonic	ZF C2H2	3165		2018
274	FBgn0267821	da	da	da-GFP	Kevin White goat-anti-GFP-UC	embryonic	bHLH	1717		2018
275	FBgn0005677	dac	dac	dac-GFP	Kevin White goat-anti-GFP-UC	prepupa	SKI/SNO/DAC	3638		2018
276	FBgn0039286	dan	dan	dan-GFP	Kevin White goat-anti-GFP-UC	embryonic	HTH	1396		2018
277	FBgn0039283	danr	danr	danr-GFP	Kevin White goat-anti-GFP-UC	embryonic	HTH	2799		2018
278	FBgn0262636	dati	dati	dati-GFP	Kevin White goat-anti-GFP-UC	embryonic	ZF C2H2	1915		2018
279	FBgn0261723	Dbx	Dbx	Dbx-GFP	Kevin White goat-anti-GFP-UC	embryonic	HD	6387		2018
280	FBgn0013799	Deaf1	Deaf1	Deaf1-GFP	Kevin White goat-anti-GFP-UC	embryonic	SAND MYND	15190		2018
281	FBgn0000439	Dfd	Dfd	10T-Dfd-GFP	Anthony Hyman non-commercial eGFP modENCODE antibody 1	embryonic	HD HOX	205		2018
282	FBgn0000439	Dfd	Dfd	10T-Dfd-GFP	Anthony Hyman non-commercial eGFP modENCODE antibody 1	wandering third instar larva	HD HOX	2045		2018
283	FBgn0000439	Dfd	Dfd	10T-Dfd-GFP	Anthony Hyman non-commercial eGFP modENCODE antibody 1	embryonic	HD HOX	714		2018
284	FBgn0011274	Dif	Dif	Dif-GFP	Abcam ab290	wandering third instar larva	RHD	2647		2018
285	FBgn0023091	dimm	dimm	dimm-GFP	Kevin White goat-anti-GFP-UC	embryonic	bHLH	1942		2018
286	FBgn0285879	disco-r	disco-r	disco-r-GFP	Kevin White goat-anti-GFP-UC	embryonic	ZF C2H2	1784		2018
287	FBgn0260632	dl	dl	dl-small-GFP	Abcam ab290	wandering third instar larva	Rel	3020		2018
288	FBgn0040466	Dlip2	Dip2	Dip2-GFP	Kevin White goat-anti-GFP-UC	embryonic	ZF THAP	973		2018
289	FBgn0040465	Dlip3	Dlip3	Dip3-GFP	Kevin White goat-anti-GFP-UC	embryonic	MADF BESS	3195		2018
290	FBgn0000157	Dll	Dll	Dll-GFP	Abcam ab290	embryonic	HD	6226		2018
291	FBgn0000157	Dll	Dll	yellow cinnabar brown speck	non-commercial Dll modENCODE antibody 1	unknown	HD	1374		2018
292	FBgn0030477	dmrt11E	dmrt11E	dmrt11E-GFP	Kevin White goat-anti-GFP-UC	embryonic	DM	8403		2018
293	FBgn0038851	dmrt93B	dmrt93B	dmrt93B-GFP	Kevin White goat-anti-GFP-UC	wandering third instar larva	DM	4160		2018
294	FBgn0039683	dmrt99B	dmrt99B	dmrt99B-GFP	Kevin White goat-anti-GFP-UC	embryonic	DM	11060		2018
295	FBgn0035956	Doc2	Doc2	Doc2-GFP	Kevin White goat-anti-GFP-UC	embryonic	T-box	1230		2018
296	FBgn0035954	Doc3	Doc3	Doc3-GFP	Abcam ab290	embryonic	T-box	3513		2018
297	FBgn0011763	Dp	Dp	Dp-GFP	Kevin White goat-anti-GFP-UC	embryonic	WH E2F/DP	12020		2018
298	FBgn0010109	dpn	dpn	dpn-GFP	Kevin White goat-anti-GFP-UC	embryonic	bHLH	5881		2018
299	FBgn0010109	dpn	dpn	dpn-MiMIC-GFP	Kevin White goat-anti-GFP-UC	embryonic	bHLH	4909		2018
300	FBgn0015664	Dref	Dref	Dref-GFP	Kevin White goat-anti-GFP-UC	embryonic	ZF BED	5583		2024
301	FBgn0085369	Drgx	Drgx	Drgx-GFP	Kevin White goat-anti-GFP-UC	embryonic	HD	8443		2024
302	FBgn0024244	drm	drm	drm-GFP	Abcam ab290	embryonic	ZF C2H2	5936		2024
303	FBgn0015381	dsf	dsf	dsf-GFP	Kevin White goat-anti-GFP-UC	wandering third instar larva	ZF NHR	4095		2024
304	FBgn0000504	dsx	dsx	dsx-GFP	Kevin White goat-anti-GFP-UC	prepupa	DM	13873		2024
305	FBgn0020307	dve	dve	dve-GFP	Abcam ab290	embryonic	HD	7011		2024
306	FBgn0039411	dysf	dysf	dysf-GFP	Kevin White goat-anti-GFP-UC	embryonic	bHLH	7959		2024
307	FBgn0000541	E(bx)	E(bx)	E(bx)-GFP	Kevin White goat-anti-GFP-UC	embryonic	ZF PHD	12497		2024
308	FBgn0002609	E(spl)m3-HLH	E(spl)m3-HLH	E(spl)m3-HLH-GFP	Kevin White goat-anti-GFP-UC	embryonic	bHLH	4600		2024
309	FBgn0002631	E(spl)m5-HLH	E(spl)m5-HLH	E(spl)m5-GFP	Kevin White goat-anti-GFP-UC	embryonic	bHLH	1837		2024
310	FBgn0002633	E(spl)m7-HLH	E(spl)m7-HLH	HLHm7-GFP	Kevin White goat-anti-GFP-UC	embryonic	bHLH	2453		2024
311	FBgn0000591	E(spl)m8-HLH	E(spl)m8-HLH	E(spl)m8-HLH-GFP	Kevin White goat-anti-GFP-UC	embryonic	bHLH	8001		2024
312	FBgn0002733	E(spl)mbeta-HLH	E(spl)mbeta-HLH	E(spl)m-beta-GFP	Kevin White goat-anti-GFP-UC	embryonic	bHLH	9347		2024
313	FBgn0002733	E(spl)mbeta-HLH	E(spl)mbeta-HLH	E(spl)m-beta-GFP	Kevin White goat-anti-GFP-UC	embryonic	bHLH	12248		2024
314	FBgn0002734	E(spl)mdelta-HLH	E(spl)mdelta-HLH	E(spl)m-delta-GFP	Kevin White goat-anti-GFP-UC	embryonic	bHLH	2792		2024
315	FBgn0002735	E(spl)mgamma-HLH	E(spl)mgamma-HLH	Esplmgamma-HLH-GFP	Kevin White goat-anti-GFP-UC	embryonic	bHLH	4168		2024
316	FBgn0260243	E(var)3-9	E(var)3-9	E(var)3-9-GFP	Kevin White goat-anti-GFP-UC	embryonic	ZF C2H2	2820		2024
317	FBgn0011766	E2f1	E2f1	E2f1-GFP	Kevin White goat-anti-GFP-UC	embryonic	PIP E2F/DP	5167		2024
318	FBgn0024371	E2f2	E2f2	E2F2-GFP	Kevin White goat-anti-GFP-UC	embryonic	WH E2F/DP	8752		2024
319	FBgn0000546	EcR	EcR	EcR-GFP	Kevin White goat-anti-GFP-UC	pupa	ZF NHR	18056		2024
320	FBgn0000546	EcR	EcR	EcR-GFP	Anthony Hyman non-commercial eGFP modENCODE antibody 1	unknown	ZF NHR	698		2024
321	FBgn0000546	EcR	EcR	EcR-GFP	Anthony Hyman non-commercial eGFP modENCODE antibody 1	unknown	ZF NHR	1427		2024
322	FBgn0000560	eg	eg	eg-GFP	Kevin White goat-anti-GFP-UC	prepupa	ZF NHR	11724		2024
323	FBgn0000567	Eip74EF	Eip74EF	Eip74EF-GFP	Kevin White goat-anti-GFP-UC	embryonic	ETS	7062		2024
324	FBgn0000567	Eip74EF	Eip74EF	Eip74EF-GFP	Abcam ab290	embryonic	ETS	352		2024
325	FBgn0000568	Eip75B	Eip75B	Eip75B-MiMIC-GFP	Kevin White goat-anti-GFP-UC	prepupa	ZF NHR	9271		2024
326	FBgn0004865	Eip78C	Eip78C	Eip78C-GFP	Kevin White goat-anti-GFP-UC	prepupa	ZF NHR	8505		2024
327	FBgn0264490	Eip93F	Eip93F	Eip93F-MiMIC-GFP	Kevin White goat-anti-GFP-UC	prepupa	HTH	1947		2024
328	FBgn0031435	Elba2	Elba2	CG9883-GFP	Kevin White goat-anti-GFP-UC	embryonic	BEN	2254		2024
329	FBgn0000575	emc	emc	emc-GFP	Kevin White goat-anti-GFP-UC	embryonic	bHLH	1698		2024
330	FBgn0000576	ems	ems	16T-GFP	Kevin White goat-anti-GFP-UC	embryonic	HD	3564		2024
331	FBgn0000577	en	en	3T-GFP	Kevin White goat-anti-GFP-UC	embryonic	HD	2790		2024
332	FBgn0031375	erm	erm	erm-GFP	Abcam ab290	embryonic	ZF C2H2	3484		2024
333	FBgn0035849	ERR	ERR	ERR-GFP	Kevin White goat-anti-GFP-UC	embryonic	ZF NHR	4024		2024
334	FBgn0287768	esg	esg	esg-GFP	Kevin White goat-anti-GFP-UC	embryonic	ZF C2H2	4419		2024
335	FBgn0005660	Ets21C	Ets21C	d.ets6-GFP	Kevin White goat-anti-GFP-UC	prepupa	ETS	4535		2024
336	FBgn0005658	Ets65A	Ets65A	ets3-GFP	Kevin White goat-anti-GFP-UC	embryonic	ETS	3029		2024
337	FBgn0039225	Ets96B	Ets96B	Ets96B-GFP	Kevin White goat-anti-GFP-UC	prepupa	ETS	10146		2024
338	FBgn0004510	Ets97D	Ets97D	Delg-GFP	Kevin White goat-anti-GFP-UC	embryonic	ETS	5207		2024
339	FBgn0005659	Ets98B	Ets98B	Ets98B-GFP	Kevin White goat-anti-GFP-UC	pupa	ETS	8788		2024
340	FBgn0000606	eve	eve	5T-GFP	Anthony Hyman non-commercial eGFP modENCODE antibody 1	embryonic	HD HOX	8496		2024
341	FBgn0000606	eve	eve	5T-GFP	Anthony Hyman non-commercial eGFP modENCODE antibody 1	embryonic	HD HOX	516		2024
342	FBgn0005427	ewg	ewg	ewg-GFP	Kevin White goat-anti-GFP-UC	embryonic	NRF1	5605		2024
343	FBgn0041156	exex	exex	exex-GFP	Kevin White goat-anti-GFP-UC	embryonic	HD	12158		2024
344	FBgn0005558	ey	ey	ey-GFP	Kevin White goat-anti-GFP-UC	wandering third instar larva	HD PRD	6319		2024
345	FBgn0000625	eyg	eyg	eyg-GFP	Kevin White goat-anti-GFP-UC	embryonic	HD PRD	2318		2024
346	FBgn0039937	fd102C	fd102C	fd102C-GFP	Kevin White goat-anti-GFP-UC	embryonic	Fork-head	1698		2024
347	FBgn0031086	fd19B	fd19B	fd19B-GFP	Abcam ab290	embryonic	Fork-head	4440		2024
348	FBgn0264954	fd3F	fd3F	fd3F-GFP	Kevin White goat-anti-GFP-UC	embryonic	Fork-head	3918		2024
349	FBgn0004896	fd59A	fd59A	fd59A-GFP	Kevin White goat-anti-GFP-UC	prepupa	Fork-head	4612		2024
350	FBgn0004897	fd96Ca	fd96Ca	fd96Ca-GFP	Kevin White goat-anti-GFP-UC	pupa	Fork-head	8373		2024
351	FBgn0004898	fd96Cb	fd96Cb	fd96Cb-GFP	Kevin White goat-anti-GFP-UC	embryonic	Fork-head	5341		2024
352	FBgn0037475	Fer1	Fer1	Fer1-GFP	Kevin White goat-anti-GFP-UC	embryonic	bHLH	8632		2024
353	FBgn0038402	Fer2	Fer2	Fer2-GFP	Kevin White goat-anti-GFP-UC	embryonic	bHLH	2909		2024
354	FBgn0037937	Fer3	Fer3	Fer3-GFP	Kevin White goat-anti-GFP-UC	embryonic	bHLH	5447		2024
355	FBgn0000659	fkh	fkh	fkh-GFP	Kevin White goat-anti-GFP-UC	prepupa	Fork-head	10553		2024
356	FBgn0036134	FoxK	FoxK	FoxK-GFP	Abcam ab290	embryonic	Fork-head	3102		2024
357	FBgn0004895	FoxL1	FoxL1	fd64A-GFP	Kevin White goat-anti-GFP-UC	embryonic	Fork-head	3088		2024
358	FBgn0038197	foxo	foxo	foxo-GFP	Kevin White goat-anti-GFP-UC	wandering third instar larva	Fork-head	806		2024
359	FBgn0038197	foxo	foxo	foxo-MiMIC-GFP	Kevin White goat-anti-GFP-UC	wandering third instar larva	Fork-head	9132		2024
360	FBgn0262477	FoxP	FoxP	fd85E-GFP	Kevin White goat-anti-GFP-UC	prepupa	Fork-head	7234		2024
361	FBgn0004652	fru	fru	fru-MiMIC-GFP	Kevin White goat-anti-GFP-UC	wandering third instar larva	ZF C2H2	9064		2024
362	FBgn0004652	fru	fru	yellow cinnabar brown speck	non-commercial fru modENCODE antibody 1	embryonic	ZF C2H2	594		2024
363	FBgn0001078	ftz-f1	ftz-f1	ftz-f1-GFP	Kevin White goat-anti-GFP-UC	embryonic	ZF NHR	8011		2024
364	FBgn0039932	fuss	CG11093	CG11093-GFP	Kevin White goat-anti-GFP-UC	embryonic	SKI/SNO/DAC	3560		2024
365	FBgn0032223	GATAd	GATAd	GATAd-GFP	Kevin White goat-anti-GFP-UC	wandering third instar larva	ZF C2H2	1016		2024
366	FBgn0038391	GATAe	GATAe	GATAe-GFP	Kevin White goat-anti-GFP-UC	embryonic	GATA	3047		2024
367	FBgn0261703	gce	gce	gce-GFP	Kevin White goat-anti-GFP-UC	embryonic	bHLH	3770		2024
368	FBgn0014179	gcm	gcm	gcm-GFP	Kevin White goat-anti-GFP-UC	embryonic	GCM	8601		2024
369	FBgn0019809	gcm2	gcm2	gcm2-GFP	Kevin White goat-anti-GFP-UC	embryonic	GCM	3223		2024
370	FBgn0050011	gem	gem	gem-GFP	Kevin White goat-anti-GFP-UC	embryonic	CP2	15132		2024
371	FBgn0250732	gfzf	gfzf	gfzf-GFP	Kevin White goat-anti-GFP-UC	embryonic	ZF C2H2	8376		2024
372	FBgn0004618	gl	gl	gl-GFP	Kevin White goat-anti-GFP-UC	pupa	ZF C2H2	6896		2024
373	FBgn0001133	grau	grau	grau-GFP	Kevin White goat-anti-GFP-UC	embryonic	ZF C2H2	12281		2024
374	FBgn0259211	grh	grh	grh-GFP	Abcam ab290	wandering third instar larva	CP2	3195		2024
375	FBgn0001138	grn	grn	grn-GFP	Kevin White goat-anti-GFP-UC	embryonic	ZF GATA	7724		2024
376	FBgn0001148	gsb	gsb	gsb-GFP	Kevin White goat-anti-GFP-UC	embryonic	HD PRD	2888		2024
377	FBgn0001147	gsb-n	gsb-n	gsb-n-GFP	Kevin White goat-anti-GFP-UC	embryonic	HD PRD	6186		2024
378	FBgn0010323	Gsc	Gsc	Gsc-GFP	Kevin White goat-anti-GFP-UC	embryonic	HD PRD	1655		2024
379	FBgn0001150	gt	gt	gt-GFP	Kevin White goat-anti-GFP-UC	embryonic	bZIP	1861		2024
380	FBgn0010825	Gug	Gug	Gug-GFP	Kevin White goat-anti-GFP-UC	embryonic	SANT	4645		2024
381	FBgn0010825	Gug	Gug	Gug-GFP	Kevin White goat-anti-GFP-UC	prepupa	SANT	5753		2024
382	FBgn0016660	H15	H15	H15-GFP	Kevin White goat-anti-GFP-UC	embryonic	T-box	4419		2024
383	FBgn0001170	H2.0	H2.0	H2.0-GFP	Kevin White goat-anti-GFP-UC	embryonic	HD	4590		2024
384	FBgn0045852	ham	ham	ham-GFP	Kevin White goat-anti-GFP-UC	embryonic	ZF C2H2	1495		2024
385	FBgn0032209	Hand	Hand	Hand-GFP	Kevin White goat-anti-GFP-UC	embryonic	bHLH	2766		2024
386	FBgn0001180	hb	hb	hb-GFP	Abcam ab290	embryonic	ZF C2H2	3779		2024
387	FBgn0008636	hbn	hbn	hbn-GFP	Abcam ab290	embryonic	HD	3735		2024
388	FBgn0001185	her	her	her-GFP	Kevin White goat-anti-GFP-UC	embryonic	ZF C2H2	5946		2024
389	FBgn0027788	Hey	Hey	Hey-GFP	Kevin White goat-anti-GFP-UC	embryonic	bHLH	3583		2024
390	FBgn0040318	HGTX	HGTX	HGTX-GFP	Abcam ab290	embryonic	HD	6509		2024
391	FBgn0038852	HHEX	HHEX	CG7056-GFP	Kevin White goat-anti-GFP-UC	embryonic	HD	4067		2024
392	FBgn0025635	Hinfp	CG17829	CG17829-GFP	Kevin White goat-anti-GFP-UC	embryonic	ZF C2H2	10551		2024
393	FBgn0261434	hkb	hkb	hkb-GFP	Kevin White goat-anti-GFP-UC	embryonic	ZF C2H2	7220		2024
394	FBgn0261434	hkb	hkb	yellow cinnabar brown speck	Aviva-KW3-hkb-D1	embryonic	ZF C2H2	2259		2024
395	FBgn0011276	HLH3B	HLH3B	HLH3B-GFP	Kevin White goat-anti-GFP-UC	embryonic	bHLH	5814		2024
396	FBgn0011277	HLH4C	HLH4C	HLH4C-GFP	Abcam ab290	embryonic	bHLH	5164		2024
397	FBgn0022740	HLH54F	HLH54F	HLH54F-GFP	Kevin White goat-anti-GFP-UC	embryonic	bHLH	3857		2024
398	FBgn0004362	HmgD	HmgD	HmgD-GFP	Kevin White goat-anti-GFP-UC	embryonic	HMG box	2988		2024
399	FBgn0010228	HmgZ	HmgZ	HmgZ-GFP	Kevin White goat-anti-GFP-UC	embryonic	HMG box	7023		2024
400	FBgn0264005	Hmx	Hmx	Hmx-MiMIC-GFP	Kevin White goat-anti-GFP-UC	embryonic	HD	1829		2024
401	FBgn0004914	Hnf4	Hnf4	Hnf4-GFP	Kevin White goat-anti-GFP-UC	wandering third instar larva	ZF NHR	6762		2024
402	FBgn0034599	hng1	hng1	CG9437-GFP	Kevin White goat-anti-GFP-UC	embryonic	MADF BESS	4270		2024
403	FBgn0037634	hng2	hng2	CG8359-GFP	Kevin White goat-anti-GFP-UC	embryonic	MADF BESS	1610		2024
404	FBgn0035160	hng3	CG13897	CG13897-GFP	Kevin White goat-anti-GFP-UC	embryonic	MADF BESS	3236		2024
405	FBgn0000448	Hr3	Hr3	Hr3-GFP	Kevin White goat-anti-GFP-UC	embryonic	ZF NHR	4827		2024
406	FBgn0014859	Hr38	Hr38	Hr38-GFP	Kevin White goat-anti-GFP-UC	prepupa	ZF NHR	608		2024
407	FBgn0261239	Hr39	Hr39	Hr39-RC-GFP	Kevin White goat-anti-GFP-UC	prepupa	ZF NHR	7226		2024
408	FBgn0261239	Hr39	Hr39	yellow cinnabar brown speck	Aviva-KW4-Hr39-D1	embryonic	ZF NHR	1363		2024
409	FBgn0264562	Hr4	Hr4	Hr4-GFP	Kevin White goat-anti-GFP-UC	prepupa	ZF NHR	8403		2024
410	FBgn0034012	Hr51	Hr51	Dhr51-GFP	Kevin White goat-anti-GFP-UC	embryonic	ZF NHR	10201		2024
411	FBgn0034012	Hr51	Hr51	Dhr51-GFP	Kevin White goat-anti-GFP-UC	embryonic	ZF NHR	3377		2024
412	FBgn0015239	Hr78	Hr78	Hr78-GFP	Abcam ab290	embryonic	ZF NHR	326		2024
413	FBgn0015239	Hr78	Hr78	Hr78-GFP	Kevin White goat-anti-GFP-UC	embryonic	ZF NHR	10609		2024
414	FBgn0015239	Hr78	Hr78	Hr78-GFP	Abcam ab290	wandering third instar larva	ZF NHR	455		2024
415	FBgn0037436	Hr83	Hr83	Hr83-GFP	Kevin White goat-anti-GFP-UC	wandering third instar larva	ZF NHR	3377		2024
416	FBgn0015240	Hr96	Hr96	Hr96-GFP	Kevin White goat-anti-GFP-UC	adult	ZF NHR	3330		2024
417	FBgn0001168	hry	h	15T-GFP	Kevin White goat-anti-GFP-UC	wandering third instar larva	bHLH	10176		2024
418	FBgn0001168	hry	h	15T-GFP	Aviva-KW3-h-D1	embryonic	bHLH	15569		2024
419	FBgn0001222	Hsf	Hsf	Hsf-GFP	Kevin White goat-anti-GFP-UC	embryonic	HSF	5318		2024
420	FBgn0001235	hth	hth	yellow cinnabar brown speck	non-commercial hth modENCODE antibody 1	embryonic	HD	3627		2024
421	FBgn0286204	ich	CG11966	CG11966-GFP	Abcam ab290	embryonic	ZF C2H2	3283		2024
422	FBgn0038768	idc	CG4936	CG4936-GFP	Abcam ab290	embryonic	ZF C2H2	7755		2024
423	FBgn0025776	ind	ind	ind-GFP	Kevin White goat-anti-GFP-UC	embryonic	HD HOX	5354		2024
424	FBgn0035213	indra	CG2199	CG2199-GFP	Kevin White goat-anti-GFP-UC	embryonic	ZF C2H2	8129		2024
425	FBgn0031434	insv	insv	insv-GFP	Kevin White goat-anti-GFP-UC	embryonic	BEN	6482		2024
426	FBgn0031434	insv	insv	insv-GFP	Kevin White goat-anti-GFP-UC	embryonic	BEN	925		2024
427	FBgn0031434	insv	insv	insv-GFP	non-commercial insv modENCODE antibody 1	embryonic	BEN	14719		2024
428	FBgn0001269	inv	inv	inv-GFP	Abcam ab290	embryonic	HD	3406		2024
429	FBgn0036126	Irbp18	CG6272	CG6272-GFP	Kevin White goat-anti-GFP-UC	embryonic	bZIP	3598		2024
430	FBgn0039350	jigr1	jigr1	jigr1-GFP	Kevin White goat-anti-GFP-UC	embryonic	MADF	2350		2024
431	FBgn0027339	jim	jim	jim-GFP	Kevin White goat-anti-GFP-UC	wandering third instar larva	ZF C2H2	1764		2024
432	FBgn0086655	jing	jing	jing-GFP	Kevin White goat-anti-GFP-UC	embryonic	ZF C2H2	5126		2024
433	FBgn0001291	Jra	Jra	Jra-GFP	Kevin White goat-anti-GFP-UC	wandering third instar larva	bZIP	3758		2024
434	FBgn0015396	jumu	jumu	jumu-MiMIC-GFP	Kevin White goat-anti-GFP-UC	embryonic	Fork-head	3507		2024
435	FBgn0035144	Kah	Kah	kah-GFP	Kevin White goat-anti-GFP-UC	embryonic	ZF C2H2	3734		2024
436	FBgn0001297	kay	kay	kay-GFP	Kevin White goat-anti-GFP-UC	adult	bZIP	3420		2024
437	FBgn0001297	kay	kay	kay-GFP	Kevin White goat-anti-GFP-UC	embryonic	bZIP	4330		2024
438	FBgn0011236	ken	ken	ken-GFP	Kevin White goat-anti-GFP-UC	embryonic	ZF C2H2	5335		2024
439	FBgn0011236	ken	ken	ken-GFP	Abcam ab290	embryonic	ZF C2H2	2356		2024
440	FBgn0014931	kipf	CG2678	CG2678-GFP	Kevin White goat-anti-GFP-UC	embryonic	ZF C2H2	11281		2024
441	FBgn0025679	Klf15	Klf15	Bteb2-GFP	Kevin White goat-anti-GFP-UC	embryonic	ZF C2H2	4650		2024
442	FBgn0013469	klu	klu	klu-GFP	Kevin White goat-anti-GFP-UC	embryonic	ZF C2H2	3126		2024
443	FBgn0032473	kmg	kmg	CG5204-GFP	Kevin White goat-anti-GFP-UC	adult	ZF C2H2	2273		2024
444	FBgn0001320	kni	kni	kni-GFP	Kevin White goat-anti-GFP-UC	embryonic	ZF NHR	10467		2024
445	FBgn0001323	knrl	knrl	knrl-GFP	Abcam ab290	embryonic	ZF NHR	4977		2024
446	FBgn0001325	Kr	Kr	Kr-GFP	Kevin White goat-anti-GFP-UC	embryonic	ZF C2H2	1360		2024
447	FBgn0266450	Kr-h1	Kr-h1	Kr-h1-GFP	Abcam ab290	embryonic	ZF C2H2	8356		2024
448	FBgn0288433	L	Oaz	Oaz-GFP	Kevin White goat-anti-GFP-UC	embryonic	ZF C2H2	2846		2024
449	FBgn0002561	l(1)sc	l(1)sc	l(1)sc-GFP	Abcam ab290	embryonic	bHLH	7760		2024
450	FBgn0265276	l(3)neo38	l(3)neo38	l(3)neo38-GFP	Kevin White goat-anti-GFP-UC	embryonic	ZF C2H2	7219		2024
451	FBgn0002522	lab	lab	lab-GFP	Kevin White goat-anti-GFP-UC	embryonic	HD HOX	11580		2024
452	FBgn0011278	lbe	lbe	lbe-GFP	Kevin White goat-anti-GFP-UC	embryonic	HD	3838		2024
453	FBgn0041111	lilli	lilli	lilli-GFP	Kevin White goat-anti-GFP-UC	embryonic		6999		2024
454	FBgn0002023	Lim3	Lim3	Lim3-GFP	Kevin White goat-anti-GFP-UC	embryonic	HD LIM	1500		2024
455	FBgn0039039	lmd	lmd	lmd-GFP	Kevin White goat-anti-GFP-UC	embryonic	ZF C2H2	6406		2024
456	FBgn0034520	lms	lms	lms-GFP	Kevin White goat-anti-GFP-UC	embryonic	HD	8575		2024
457	FBgn0283521	lola	lola	lola-J-GFP	Kevin White goat-anti-GFP-UC	embryonic	ZF C2H2	9712		2024
458	FBgn0283521	lola	lola	lola-RI-GFP	Abcam ab290	embryonic	ZF C2H2	794		2024
459	FBgn0283521	lola	lola	lola-RI-GFP	Abcam ab290	embryonic	ZF C2H2	280		2024
460	FBgn0283521	lola	lola	lola-RI-GFP	Kevin White goat-anti-GFP-UC	wandering third instar larva	ZF C2H2	14888		2024
461	FBgn0266129	lov	lov	lov-GFP	Kevin White goat-anti-GFP-UC	embryonic	HTH	4337		2024
462	FBgn0266129	lov	lov	yellow cinnabar brown speck	non-commercial lov modENCODE antibody 1	embryonic	HTH	470		2024
463	FBgn0040765	luna	luna	luna-MiMIC-GFP	Kevin White goat-anti-GFP-UC	embryonic	ZF C2H2	1312		2024
464	FBgn0002576	lz	lz	lz-GFP	Kevin White goat-anti-GFP-UC	prepupa	Runt	7612		2024
465	FBgn0037621	M1BP	M1BP	CG9797-GFP	Kevin White goat-anti-GFP-UC	embryonic	ZF C2H2	4950		2024
466	FBgn0032493	Mabi	Mabi	CG15479-GFP	Kevin White goat-anti-GFP-UC	embryonic	bZIP	9390		2024
467	FBgn0011648	Mad	Mad	Mad-GFP	Kevin White goat-anti-GFP-UC	embryonic	MH1	3369		2024
468	FBgn0034534	maf-S	maf-S	maf-S-GFP	Kevin White goat-anti-GFP-UC	embryonic	bZIP	3518		2024
469	FBgn0017578	Max	Max	Max-GFP	Kevin White goat-anti-GFP-UC	embryonic	bHLH	4179		2024
470	FBgn0038016	MBD-R2	MBD-R2	MBD-R2-GFP	Kevin White goat-anti-GFP-UC	embryonic	ZF C2H2, ZF THAP	7544		2024
471	FBgn0288966	Med	Med	Med-GFP	Kevin White goat-anti-GFP-UC	embryonic	MH1	6094		2024
472	FBgn0011656	Mef2	Mef2	Mef2-GFP	Abcam ab290	embryonic	MADS box	10570		2024
473	FBgn0025874	Meics	Meics	Meics-GFP	Kevin White goat-anti-GFP-UC	embryonic	ZF C2H2	6624		2024
474	FBgn0037207	Mes2	Mes2	Mes2-GFP	Abcam ab290	embryonic	MADF	2866		2024
475	FBgn0034240	MESR4	MESR4	MESR4-GFP	Kevin White goat-anti-GFP-UC	embryonic	ZF C2H2, ZF PHD	11219		2024
476	FBgn0002723	Met	Met	Met-GFP	Kevin White goat-anti-GFP-UC	prepupa	bHLH	9358		2024
477	FBgn0261963	mid	mid	mid-GFP	Abcam ab290	embryonic	T-box	6316		2024
478	FBgn0014343	mirr	mirr	mirr-GFP	Kevin White goat-anti-GFP-UC	embryonic	HD	8966		2024
479	FBgn0263490	mld	mld	mld-GFP	Abcam ab290	embryonic	ZF C2H2	2996		2024
480	FBgn0023215	Mnt	Mnt	Mnt-GFP	Kevin White goat-anti-GFP-UC	adult	bHLH	5935		2024
481	FBgn0032940	Mondo	Mondo	Mio-GFP	Kevin White goat-anti-GFP-UC	wandering third instar larva	bHLH	968		2024
482	FBgn0052296	Mrtf	Mrtf	Mrtf-GFP	Kevin White goat-anti-GFP-UC	embryonic	SAP	4033		2024
483	FBgn0040305	MTF-1	MTF-1	MTF-1-GFP	Kevin White goat-anti-GFP-UC	embryonic	ZF C2H2	2474		2024
484	FBgn0002914	Myb	Myb	Myb-GFP	Kevin White goat-anti-GFP-UC	embryonic	HTH Myb	5501		2024
485	FBgn0262656	Myc	Myc	Myc-GFP	KW1-dm-D1	embryonic	bHLH	112		2024
486	FBgn0262656	Myc	Myc	Myc-GFP	Kevin White goat-anti-GFP-UC	embryonic	bHLH	3299		2024
487	FBgn0262656	Myc	Myc	yellow cinnabar brown speck	Santa Cruz Biotechnology sc-28208	wandering third instar larva	bHLH	3494		2024
488	FBgn0002922	nau	nau	nau-GFP	Kevin White goat-anti-GFP-UC	embryonic	bHLH	6871		2024
489	FBgn0034650	NC2alpha	NC2alpha	NC2alpha-GFP	Kevin White goat-anti-GFP-UC	embryonic	CBF/NF-Y	2015		2024
490	FBgn0028926	NC2beta	NC2beta	NC2beta-GFP	Kevin White goat-anti-GFP-UC	embryonic	Histone fold	4809		2024
491	FBgn0028999	nerfin-1	nerfin-1	nerfin-1-GFP	Kevin White goat-anti-GFP-UC	embryonic	ZF C2H2	11132		2024
492	FBgn0041105	nerfin-2	nerfin-2	nerfin-2-GFP	Abcam ab290	embryonic	ZF C2H2	3369		2024
493	FBgn0002931	net	net	net-GFP	Kevin White goat-anti-GFP-UC	prepupa	bHLH	9852		2024
494	FBgn0037085	Neu2	Neu2	Neu2-GFP	Kevin White goat-anti-GFP-UC	embryonic	ZF C2H2	1287		2024
498	FBgn0030505	NFAT	NFAT	NFAT-GFP	Kevin White goat-anti-GFP-UC	embryonic	RHD	4924		2024
499	FBgn0042696	NfI	NfI	NfI-GFP	Kevin White goat-anti-GFP-UC	embryonic	MH1	5736		2024
495	FBgn0035993	Nf-YA	Nf-YA	Nf-YA-GFP	Kevin White goat-anti-GFP-UC	embryonic	NFYA-HAP2	3354		2024
496	FBgn0032816	Nf-YB	Nf-YB	Nf-YB-GFP	Kevin White goat-anti-GFP-UC	embryonic	CBF/NF-Y	9834		2024
497	FBgn0029905	Nf-YC	Nf-YC	Nf-Yc-GFP	Kevin White goat-anti-GFP-UC	embryonic	CBF/NF-Y	11322		2024
500	FBgn0024321	NK7.1	NK7.1	NK7.1-GFP	Kevin White goat-anti-GFP-UC	embryonic	HD	1949		2024
501	FBgn0038549	Nnk	CG17802	CG17802-GFP	Kevin White goat-anti-GFP-UC	embryonic	ZF C2H2	2795		2024
502	FBgn0037617	nom	nom	CG8145-GFP	Kevin White goat-anti-GFP-UC	embryonic	ZF C2H2 SET	8488		2024
503	FBgn0085424	nub	nub	nub-GFP	Abcam ab290	embryonic	HD POU	7177		2024
504	FBgn0004102	oc	oc	oc-GFP	Kevin White goat-anti-GFP-UC	embryonic	HD PRD	9045		2024
505	FBgn0002985	odd	odd	odd-GFP	Kevin White goat-anti-GFP-UC	embryonic	ZF C2H2	4814		2024
506	FBgn0038551	Odj	CG7357	CG7357-GFP	Kevin White goat-anti-GFP-UC	embryonic	ZF C2H2	4491		2024
507	FBgn0026058	OdsH	OdsH	OdsH-GFP	Kevin White goat-anti-GFP-UC	prepupa	HD	8209		2024
508	FBgn0026058	OdsH	OdsH	OdsH-GFP	Kevin White goat-anti-GFP-UC	wandering third instar larva	HD	6458		2024
509	FBgn0032651	Oli	Oli	Oli-GFP	Kevin White goat-anti-GFP-UC	embryonic	bHLH	7552		2024
510	FBgn0028996	onecut	onecut	onecut-GFP	Kevin White goat-anti-GFP-UC	embryonic	HD	7222		2024
511	FBgn0050443	Opbp	Opbp	Opbp-GFP	Abcam ab290	embryonic	ZF C2H2	5686		2024
512	FBgn0025360	Optix	Optix	Optix-GFP	Kevin White goat-anti-GFP-UC	embryonic	HD	3523		2024
513	FBgn0021767	org-1	org-1	org-1-GFP	Kevin White goat-anti-GFP-UC	embryonic	T-box	3516		2024
514	FBgn0015524	otp	otp	otp-GFP	Kevin White goat-anti-GFP-UC	embryonic	HD PRD	5060		2024
515	FBgn0037618	ouib	ouib	CG11762-GFP	Kevin White goat-anti-GFP-UC	prepupa	ZF C2H2	5020		2024
516	FBgn0003028	ovo	ovo	ovo-GFP	Kevin White goat-anti-GFP-UC	adult	ZF C2H2	2628		2024
517	FBgn0039044	p53	p53	p53-MiMIC-GFP	Kevin White goat-anti-GFP-UC	embryonic	p53	1901		2024
518	FBgn0038418	pad	pad	pad-GFP	Kevin White goat-anti-GFP-UC	adult	ZF C2H2	8202		2024
519	FBgn0085432	pan	pan	Hr3-GFP	non-commercial pan modENCODE antibody 1	embryonic	HMG box	166		2024
520	FBgn0085432	pan	pan	pan-GFP	Kevin White goat-anti-GFP-UC	embryonic	HMG box	7084		2024
521	FBgn0085432	pan	pan	yellow cinnabar brown speck	non-commercial pan modENCODE antibody 1	embryonic	HMG box	317		2024
522	FBgn0085432	pan	pan	yellow cinnabar brown speck	non-commercial pan modENCODE antibody 1	embryonic	HMG box	261		2024
523	FBgn0085432	pan	pan	yellow cinnabar brown speck	non-commercial pan modENCODE antibody 1	unknown	HMG box	979		2024
524	FBgn0085432	pan	pan	yellow cinnabar brown speck	non-commercial pan modENCODE antibody 1	wandering third instar larva	HMG box	446		2024
525	FBgn0031610	Paris	CG15436	CG15436-GFP	Abcam ab290	embryonic	ZF C2H2	3367		2024
526	FBgn0051481	pb	pb	pb-GFP	Kevin White goat-anti-GFP-UC	embryonic	HD HOX	2810		2024
527	FBgn0004394	pdm2	pdm2	pdm2-GFP	Abcam ab290	embryonic	HD POU	2194		2024
528	FBgn0261588	pdm3	pdm3	pdm3-GFP	Kevin White goat-anti-GFP-UC	prepupa	HD POU	8258		2024
529	FBgn0016694	Pdp1	Pdp1	Pdp1-GFP	Kevin White goat-anti-GFP-UC	embryonic	bZIP	12916		2024
530	FBgn0016694	Pdp1	Pdp1	Pdp1-MiMIC-GFP	Kevin White goat-anti-GFP-UC	embryonic	bZIP	4372		2024
531	FBgn0003053	peb	peb	peb-GFP	Kevin White goat-anti-GFP-UC	embryonic	ZF C2H2	2845		2024
532	FBgn0025334	PHDP	PHDP	PHDP-GFP	Kevin White goat-anti-GFP-UC	embryonic	HD	9639		2024
533	FBgn0002521	pho	pho	pho-GFP	Kevin White goat-anti-GFP-UC	embryonic	ZF C2H2	3456		2024
534	FBgn0035997	phol	phol	phol-GFP	Kevin White goat-anti-GFP-UC	embryonic	ZF C2H2	13882		2024
535	FBgn0036522	Phs	CG7372	CG7372-GFP	Kevin White goat-anti-GFP-UC	embryonic	ZF C2H2	4782		2024
536	FBgn0034878	pita	pita	Pita-GFP	Kevin White goat-anti-GFP-UC	embryonic	ZF C2H2	2358		2024
537	FBgn0032401	Plzf	Plzf	CG6792-GFP	Kevin White goat-anti-GFP-UC	prepupa	ZF C2H2	7288		2024
538	FBgn0003118	pnt	pnt	pnt-MiMIC-GFP	Kevin White goat-anti-GFP-UC	embryonic	ETS	3479		2024
539	FBgn0003130	Poxn	Poxn	Poxn-GFP	Kevin White goat-anti-GFP-UC	embryonic	HD PRD	1488		2024
540	FBgn0003145	prd	prd	prd-GFP	Kevin White goat-anti-GFP-UC	embryonic	HD PRD	8720		2024
541	FBgn0003145	prd	prd	yellow cinnabar brown speck	non-commercial prd modENCODE antibody 1	embryonic	HD PRD	236		2024
542	FBgn0003145	prd	prd	yellow cinnabar brown speck	non-commercial prd modENCODE antibody 2	embryonic	HD PRD	494		2024
543	FBgn0035687	Prdm13	CG13296	CG13296-GFP	Kevin White goat-anti-GFP-UC	embryonic	ZF C2H2	8311		2024
544	FBgn0285971	prg	prg	fu2-GFP	Kevin White goat-anti-GFP-UC	embryonic	ZF C2H2	2805		2024
545	FBgn0004595	pros	pros	pros-GFP	Kevin White goat-anti-GFP-UC	embryonic	HD	12794		2024
546	FBgn0263102	psq	psq	psq-GFP	Kevin White goat-anti-GFP-UC	embryonic	HTH	2548		2024
547	FBgn0263102	psq	psq	psq-GFP	Aviva-KW3-psq-D2	embryonic	HTH	1070		2024
548	FBgn0263102	psq	psq	psq-GFP	Kevin White goat-anti-GFP-UC	wandering third instar larva	HTH	14305		2024
549	FBgn0263102	psq	psq	psq-GFP	Kevin White goat-anti-GFP-UC	wandering third instar larva	HTH	7370		2024
550	FBgn0263102	psq	psq	yellow cinnabar brown speck	Aviva-KW3-psq-D2	unknown	HTH	335		2024
551	FBgn0020912	Ptx1	Ptx1	Ptx1-GFP	Kevin White goat-anti-GFP-UC	embryonic	HD PRD	7439		2024
552	FBgn0259785	pzg	pzg	pzg-GFP	Kevin White goat-anti-GFP-UC	embryonic	ZF C2H2	8680		2024
553	FBgn0037620	ranshi	ranshi	ranshi-GFP	Kevin White goat-anti-GFP-UC	embryonic	ZF C2H2	5373		2024
554	FBgn0014018	Rel	Rel	Rel-GFP	Kevin White goat-anti-GFP-UC	wandering third instar larva	Rel	1628		2024
555	FBgn0014018	Rel	Rel	Rel-GFP	Kevin White goat-anti-GFP-UC	wandering third instar larva	Rel	13056		2024
556	FBgn0011701	repo	repo	repo-GFP	Kevin White goat-anti-GFP-UC	embryonic	HD	2770		2024
557	FBgn0039209	REPTOR	REPTOR	CG13624-GFP	Kevin White goat-anti-GFP-UC	embryonic	bZIP	5533		2024
558	FBgn0032202	REPTOR-BP	REPTOR-BP	CG18619-GFP	Kevin White goat-anti-GFP-UC	embryonic	bZIP	3866		2024
559	FBgn0020379	Rfx	Rfx	Rfx-GFP	Kevin White goat-anti-GFP-UC	embryonic	WH	9250		2024
560	FBgn0267792	rgr	rgr	rgr-GFP	Kevin White goat-anti-GFP-UC	wandering third instar larva	MADF ZF C2H2	7820		2024
561	FBgn0003254	rib	rib	rib-GFP	Kevin White goat-anti-GFP-UC	embryonic	HTH	4606		2024
562	FBgn0267337	rn	rn	rn-GFP	Kevin White goat-anti-GFP-UC	pupa	ZF C2H2	3777		2024
563	FBgn0003267	ro	ro	ro-GFP	Kevin White goat-anti-GFP-UC	embryonic	HD HOX	1969		2024
564	FBgn0033998	row	row	row-GFP	Kevin White goat-anti-GFP-UC	embryonic	ZF C2H2	13292		2024
565	FBgn0003300	run	run	run-GFP	Kevin White goat-anti-GFP-UC	embryonic	Runt	3751		2024
566	FBgn0259162	RunxB	RunxB	RunxB-GFP	Abcam ab290	embryonic	Runt	3500		2024
567	FBgn0020617	Rx	Rx	Rx-GFP	Kevin White goat-anti-GFP-UC	embryonic	HD PRD	3476		2024
568	FBgn0037672	sage	sage	sage-GFP	Kevin White goat-anti-GFP-UC	wandering third instar larva	bHLH	2449		2024
569	FBgn0261648	salm	salm	salm-GFP	Kevin White goat-anti-GFP-UC	embryonic	ZF C2H2	5465		2024
570	FBgn0000287	salr	salr	salr-GFP	Kevin White goat-anti-GFP-UC	prepupa	ZF C2H2	11299		2024
571	FBgn0000287	salr	salr	salr-GFP	Kevin White goat-anti-GFP-UC	prepupa	ZF C2H2	4231		2024
572	FBgn0004170	sc	sc	sc-GFP	Kevin White goat-anti-GFP-UC	embryonic	bHLH	2961		2024
573	FBgn0004170	sc	sc	yellow cinnabar brown speck	non-commercial scute modENCODE antibody 1	embryonic	bHLH	103		2024
574	FBgn0004170	sc	sc	yellow cinnabar brown speck	non-commercial scute modENCODE antibody 1	embryonic	bHLH	114		2024
575	FBgn0040918	schlank	schlank	schlank-GFP	Kevin White goat-anti-GFP-UC	embryonic	HD	2136		2024
576	FBgn0003339	Scr	Scr	Scr-GFP	Abcam ab290	embryonic	HD HOX	5742		2024
577	FBgn0287186	scro	scro	scro-GFP	Abcam ab290	embryonic	HD	4026		2024
578	FBgn0004880	scrt	scrt	scrt-GFP	Kevin White goat-anti-GFP-UC	embryonic	ZF C2H2	8909		2024
579	FBgn0003345	sd	sd	sd-GFP	Kevin White goat-anti-GFP-UC	embryonic	TEA	16617		2024
580	FBgn0002573	sens	sens	sens-GFP	Kevin White goat-anti-GFP-UC	embryonic	ZF C2H2	2858		2024
581	FBgn0051632	sens-2	sens-2	sens-2-GFP	Kevin White goat-anti-GFP-UC	embryonic	ZF C2H2	3171		2024
582	FBgn0028991	seq	seq	seq-GFP	Kevin White goat-anti-GFP-UC	embryonic	ZF C2H2	5287		2024
583	FBgn0003396	shn	shn	shn-GFP	Kevin White goat-anti-GFP-UC	embryonic	ZF C2H2	3423		2024
584	FBgn0032741	Sidpn	Sidpn	Sidpn-GFP	Abcam ab290	embryonic	bHLH	3833		2024
585	FBgn0032741	Sidpn	Sidpn	side-MiMIC-GFP	Kevin White goat-anti-GFP-UC	embryonic	bHLH	4164		2024
586	FBgn0004666	sim	sim	sim-GFP	Kevin White goat-anti-GFP-UC	embryonic	bHLH	2682		2024
587	FBgn0266411	sima	sima	sima-RB-GFP	Kevin White goat-anti-GFP-UC	embryonic	bHLH	1237		2024
588	FBgn0003411	sisA	sisA	sisA-GFP	Kevin White goat-anti-GFP-UC	embryonic	bZIP	5643		2024
589	FBgn0027364	Six4	Six4	Six4-GFP	Kevin White goat-anti-GFP-UC	embryonic	HD	3674		2024
590	FBgn0005638	slbo	slbo	slbo-GFP	Kevin White goat-anti-GFP-UC	embryonic	bZIP	8786		2024
591	FBgn0002941	slou	slou	slou-GFP	Kevin White goat-anti-GFP-UC	embryonic	HD	2826		2024
592	FBgn0003430	slp1	slp1	slp1-GFP	Abcam ab290	embryonic	Fork-head	3371		2024
593	FBgn0004567	slp2	slp2	9T-GFP	Kevin White goat-anti-GFP-UC	embryonic	Fork-head	2659		2024
594	FBgn0025800	Smox	Smox	Smox-GFP	Kevin White goat-anti-GFP-UC	prepupa	MH1	10844		2024
595	FBgn0003448	sna	sna	sna-GFP	Abcam ab290	embryonic	ZF C2H2	4222		2024
596	FBgn0085450	Snoo	Snoo	snoo-MiMIC-GFP	Kevin White goat-anti-GFP-UC	pupa	SKI/SNO/DAC	8119		2024
597	FBgn0003460	so	so	so-GFP	Kevin White goat-anti-GFP-UC	embryonic	HD	5376		2024
598	FBgn0004892	sob	sob	sob-GFP	Kevin White goat-anti-GFP-UC	embryonic	ZF C2H2	7002		2024
599	FBgn0024288	Sox100B	Sox100B	Sox100B-GFP	Kevin White goat-anti-GFP-UC	embryonic	HMG box	6747		2024
600	FBgn0039938	Sox102F	Sox102F	Sox102F-GFP	Kevin White goat-anti-GFP-UC	embryonic	HMG box	8314		2024
601	FBgn0039938	Sox102F	Sox102F	Sox102F-GFP	Kevin White goat-anti-GFP-UC	prepupa	HMG box	11651		2024
602	FBgn0005612	Sox14	Sox14	Sox14-GFP	Kevin White goat-anti-GFP-UC	prepupa	HMG box	8894		2024
603	FBgn0005613	Sox15	Sox15	Sox15-GFP	Kevin White goat-anti-GFP-UC	prepupa	HMG box	4240		2024
604	FBgn0029123	SoxN	SoxN	SoxN-GFP	Abcam ab290	embryonic	HMG box	4615		2024
605	FBgn0020378	Sp1	Sp1	Sp1-GFP	Kevin White goat-anti-GFP-UC	wandering third instar larva	ZF C2H2	11450		2024
606	FBgn0039169	Spps	Spps	Spps-GFP	Kevin White goat-anti-GFP-UC	embryonic	ZF C2H2	3213		2024
607	FBgn0010768	sqz	sqz	sqz-GFP	Kevin White goat-anti-GFP-UC	embryonic	ZF C2H2	8714		2024
608	FBgn0003499	sr	sr	sr-GFP	Kevin White goat-anti-GFP-UC	embryonic	ZF C2H2	5040		2024
609	FBgn0261283	SREBP	SREBP	SREBP-GFP	Kevin White goat-anti-GFP-UC	wandering third instar larva	bHLH	8499		2024
610	FBgn0003511	Sry-beta	Sry-beta	Sry-beta-GFP	Kevin White goat-anti-GFP-UC	embryonic	ZF C2H2	3248		2024
611	FBgn0003512	Sry-delta	Sry-delta	Sry-delta-GFP	Kevin White goat-anti-GFP-UC	embryonic	ZF C2H2	9418		2024
612	FBgn0003513	ss	ss	ss-GFP	Kevin White goat-anti-GFP-UC	prepupa	bHLH	11850		2024
613	FBgn0003513	ss	ss	ss-GFP	Kevin White goat-anti-GFP-UC	prepupa	bHLH	11153		2024
614	FBgn0036248	ssp	ssp	ssp-GFP	Kevin White goat-anti-GFP-UC	embryonic	ZF BED	4948		2024
615	FBgn0016917	Stat92E	Stat92E	Stat92E-GFP	Abcam ab290	embryonic	SH2	331		2024
616	FBgn0016917	Stat92E	Stat92E	Stat92E-GFP	Kevin White goat-anti-GFP-UC	embryonic	SH2	5851		2024
617	FBgn0001978	stc	stc	stc-GFP	Kevin White goat-anti-GFP-UC	embryonic	ZF RING	5084		2024
618	FBgn0003459	stwl	stwl	stwl-GFP	Kevin White goat-anti-GFP-UC	embryonic	MADF-BESS	8170		2024
619	FBgn0004837	Su(H)	Su(H)	Su(H)-GFP	Kevin White goat-anti-GFP-UC	embryonic	Rbp-J/Cbf11/Cbf12	3079		2024
620	FBgn0004837	Su(H)	Su(H)	Su(H)-GFP	Santa Cruz Biotechnology sc-25761	embryonic	Rbp-J/Cbf11/Cbf12	21750		2024
621	FBgn0004837	Su(H)	Su(H)	yellow cinnabar brown speck	Santa Cruz Biotechnology sc-25761	embryonic	Rbp-J/Cbf11/Cbf12	399		2024
622	FBgn0003567	su(Hw)	su(Hw)	SuHw-GFP	Kevin White goat-anti-GFP-UC	embryonic	ZF C2H2	8346		2024
623	FBgn0033782	sug	sug	sug-GFP	Kevin White goat-anti-GFP-UC	embryonic	ZF C2H2	12988		2024
624	FBgn0005561	sv	sv	sv-GFP	Kevin White goat-anti-GFP-UC	wandering third instar larva	HD PRD	3742		2024
625	FBgn0003651	svp	svp	svp-GFP	Kevin White goat-anti-GFP-UC	prepupa	ZF - NHR	9680		2024
626	FBgn0041092	tai	tai	tai-GFP	Kevin White goat-anti-GFP-UC	wandering third instar larva	bHLH	2572		2024
627	FBgn0015550	tap	tap	tap-GFP	Kevin White goat-anti-GFP-UC	embryonic	bHLH	4045		2024
628	FBgn0003683	term	term	term-GFP	Abcam ab290	embryonic	ZF C2H2	92		2024
629	FBgn0038805	TFAM	TFAM	TFAM-GFP	Kevin White goat-anti-GFP-UC	embryonic	HMG box	1458		2024
630	FBgn0261953	TfAP-2	TfAP-2	TfAP-2-GFP	Abcam ab290	embryonic	AP-2	4611		2024
631	FBgn0264075	tgo	tgo	tgo-GFP	Kevin White goat-anti-GFP-UC	embryonic	bHLH	5794		2024
632	FBgn0038978	tHMG1	tHMG1	CG7045-GFP	Kevin White goat-anti-GFP-UC	adult	HMG box	3609		2024
633	FBgn0004110	tin	tin	tin-GFP	Kevin White goat-anti-GFP-UC	embryonic	HD	5179		2024
634	FBgn0028979	tio	tio	tio-GFP	Kevin White goat-anti-GFP-UC	embryonic	ZF C2H2	4597		2024
635	FBgn0000964	tj	tj	tj-GFP	Kevin White goat-anti-GFP-UC	adult	bZIP	13837		2024
636	FBgn0003720	tll	tll	8T-GFP	Kevin White goat-anti-GFP-UC	embryonic	ZF - NHR	8354		2024
637	FBgn0003720	tll	tll	8T-GFP	Anthony Hyman non-commercial eGFP modENCODE antibody 1	embryonic	ZF - NHR	1636		2024
638	FBgn0036285	toe	toe	toe-GFP	Kevin White goat-anti-GFP-UC	adult	HD PRD	3642		2024
639	FBgn0037751	topi	topi	topi-GFP	Kevin White goat-anti-GFP-UC	prepupa	ZF C2H2	8127		2024
640	FBgn0019650	toy	toy	toy-GFP	Kevin White goat-anti-GFP-UC	embryonic	HD PRD	1895		2024
641	FBgn0038767	trem	trem	trem-GFP	Kevin White goat-anti-GFP-UC	embryonic	ZF C2H2	6536		2024
642	FBgn0262139	trh	trh	trh-GFP	Kevin White goat-anti-GFP-UC	embryonic	bHLH	1753		2024
643	FBgn0013263	Trl	Trl	Trl-MiMIC-GFP	Kevin White goat-anti-GFP-UC	embryonic	ZF C2H2	4138		2024
644	FBgn0013263	Trl	Trl	yellow cinnabar brown speck	Aviva-KW3-Trl-D2	embryonic	ZF C2H2	17037		2024
645	FBgn0013263	Trl	Trl	yellow cinnabar brown speck	Aviva-KW3-Trl-D2	embryonic	ZF C2H2	5179		2024
646	FBgn0003870	ttk	ttk	ttk-GFP	Kevin White goat-anti-GFP-UC	embryonic	ZF C2H2	4745		2024
647	FBgn0003896	tup	tup	Tup-GFP	Kevin White goat-anti-GFP-UC	embryonic	HD LIM	1615		2024
648	FBgn0003900	twi	twi	twi-GFP	Kevin White goat-anti-GFP-UC	embryonic	bHLH	9659		2024
649	FBgn0288888	tx	tx	tx-GFP	Kevin White goat-anti-GFP-UC	embryonic	bHLH	3019		2024
650	FBgn0024184	unc-4	unc-4	unc-4-GFP	Abcam ab290	embryonic	HD PRD	4921		2024
651	FBgn0015561	unpg	unpg	unpg-GFP	Kevin White goat-anti-GFP-UC	embryonic	HD	9843		2024
652	FBgn0029711	Usf	Usf	Usf-GFP	Kevin White goat-anti-GFP-UC	embryonic	bHLH	2320		2024
653	FBgn0003963	ush	ush	ush-GFP	Abcam ab290	embryonic	ZF C2H2	6031		2024
654	FBgn0003964	usp	usp	usp-GFP	Abcam ab290	embryonic	ZF NHR	215		2024
655	FBgn0003964	usp	usp	usp-GFP	Abcam ab290	unknown	ZF NHR	523		2024
656	FBgn0003964	usp	usp	usp-GFP	Kevin White goat-anti-GFP-UC	wandering third instar larva	ZF NHR	307		2024
657	FBgn0003964	usp	usp	usp-GFP	Kevin White goat-anti-GFP-UC	wandering third instar larva	ZF NHR	19417		2024
658	FBgn0261930	vnd	vnd	vnd-GFP	Abcam ab290	embryonic	HD	3825		2024
659	FBgn0016076	vri	vri	vri-GFP	Kevin White goat-anti-GFP-UC	prepupa	bZIP	12909		2024
660	FBgn0263511	Vsx1	Vsx1	Vsx1-GFP	Kevin White goat-anti-GFP-UC	embryonic	HD	5402		2024
661	FBgn0263512	Vsx2	Vsx2	Vsx2-GFP	Abcam ab290	wandering third instar larva	HD	2140		2024
662	FBgn0086680	vvl	vvl	vvl-GFP	Kevin White goat-anti-GFP-UC	embryonic	HD POU	11692		2024
663	FBgn0005642	wdn	wdn	wdn-GFP	Kevin White goat-anti-GFP-UC	embryonic	ZF C2H2	3254		2024
664	FBgn0001990	wek	wek	wek-GFP	Kevin White goat-anti-GFP-UC	embryonic	ZF C2H2	3582		2024
665	FBgn0010328	woc	woc	woc-GFP	Kevin White goat-anti-GFP-UC	wandering third instar larva	DUF TRASH	9087		2024
666	FBgn0001983	wor	wor	wor-GFP	Kevin White goat-anti-GFP-UC	embryonic	ZF C2H2	3081		2024
667	FBgn0021872	Xbp1	Xbp1	Xbp1-GFP	Kevin White goat-anti-GFP-UC	embryonic	bZIP	6081		2024
668	FBgn0261113	Xrp1	Xrp1	Xrp1-GFP	Kevin White goat-anti-GFP-UC	embryonic	bZIP	8735		2024
669	FBgn0004050	z	z	z-GFP	Kevin White goat-anti-GFP-UC	embryonic	SANT-MYB	4457		2024
670	FBgn0037921	Zaf1	CG6808	CG6808-GFP	Kevin White goat-anti-GFP-UC	prepupa	ZF C2H2	7791		2024
671	FBgn0004053	zen	zen	zen-GFP	Kevin White goat-anti-GFP-UC	embryonic	HD HOX	10805		2024
672	FBgn0004054	zen2	zen2	zen2-GFP	Abcam ab290	embryonic	HD HOX	3305		2024
673	FBgn0270924	zf30C	zf30C	zf30C-GFP	Kevin White goat-anti-GFP-UC	embryonic	ZF C2H2	6445		2024
674	FBgn0004606	zfh1	zfh1	zfh1-GFP	Kevin White goat-anti-GFP-UC	embryonic	ZF C2H2	7462		2024
675	FBgn0004607	zfh2	zfh2	zfh2-GFP	Kevin White goat-anti-GFP-UC	embryonic	ZF C2H2 HD	4330		2024
676	FBgn0037446	Zif	Zif	Zif-GFP	Kevin White goat-anti-GFP-UC	embryonic	ZF C2H2	11250		2024
677	FBgn0039740	ZIPIC	ZIPIC	CG7928-GFP	Kevin White goat-anti-GFP-UC	embryonic	ZF C2H2	1610		2024
678	FBgn0259789	zld	zld	vfl-GFP	Kevin White goat-anti-GFP-UC	embryonic	ZF C2H2	3300		2024

## Sheet: S3.Fly NonTFs with ChiP-seq
	Flybase ID	Flybase symbol (2023)	Symbol used on site	Strain	Antibody	Stage	Classification	Peaks		Publication Date
1	FBgn0037555	Ada2b	Ada2b	Ada2b-GFP	Abcam ab290	embryonic	chromatin factor	4990		2018
2	FBgn0026573	ADD1	ADD1	ADD1-MiMIC-GFP	Kevin White goat-anti-GFP-UC	embryonic	DNA replication	7083		2018
3	FBgn0026573	ADD1	ADD1	CG8290	Kevin White goat-anti-GFP-UC	embryonic	DNA replication	11006		2018
4	FBgn0026573	ADD1	ADD1	CG8290	Kevin White goat-anti-GFP-UC	embryonic	DNA replication	1846		2018
5	FBgn0005386	ash1	ash1	Ash1-GFP	Kevin White goat-anti-GFP-UC	embryonic	chromatin factor	2655		2018
6	FBgn0015602	BEAF-32	BEAF-32	BEAF-32-GFP	Kevin White goat-anti-GFP-UC	embryonic	chromatin factor	10203		2018
7	FBgn0013753	Bgb	Bgb	Bgb-GFP	Abcam ab290	embryonic	TF co-regulator	6393		2018
8	FBgn0037051	CG10565	CG10565	CG10565-GFP	Kevin White goat-anti-GFP-UC	embryonic	RNA binding	1232		2018
9	FBgn0040929	CG12659	CG12659	CG12659-GFP	Kevin White goat-anti-GFP-UC	embryonic	chromatin factor	7146		2018
10	FBgn0029672	CG2875	CG2875	CG2875-GFP	Kevin White goat-anti-GFP-UC	embryonic	Protein binding	2940		2018
11	FBgn0052264	CG32264	CG32264	CG32264-GFP	Kevin White goat-anti-GFP-UC	wandering third instar larva	Protein binding	1922		2018
12	FBgn0030990	CG7556	CG7556	CG7556-GFP	Kevin White goat-anti-GFP-UC	embryonic	Protein binding	9166		2018
13	FBgn0036661	CG9705	CG9705	CG9705-GFP	Kevin White goat-anti-GFP-UC	wandering third instar larva	RNA binding	3392		2018
14	FBgn0000307	chif	chif	chif-RA-GFP	Kevin White goat-anti-GFP-UC	embryonic	DNA replication	3011		2018
15	FBgn0000307	chif	chif	chif-RB-GFP	Kevin White goat-anti-GFP-UC	embryonic	DNA replication	5588		2018
16	FBgn0028387	chm	chm	chm-GFP	Kevin White goat-anti-GFP-UC	embryonic	Transferase	6176		2024
17	FBgn0043001	Chrac-16	Chrac-16	Chrac-16-GFP	Kevin White goat-anti-GFP-UC	embryonic	chromatin factor	4609		2018
18	FBgn0010313	corto	corto	corto-GFP	Kevin White goat-anti-GFP-UC	embryonic	chromatin factor	1904		2018
19	FBgn0020493	Dad	Dad	Dad-GFP	Kevin White goat-anti-GFP-UC	embryonic	Protein binding	3702		2018
20	FBgn0026533	Dek	Dek	Dek	Kevin White goat-anti-GFP-UC	embryonic	DNA Repair	6493		2018
21	FBgn0278608	Dsp1	Dsp1	Dsp1-GFP	Abcam ab290	embryonic	chromatin factor	8280		2018
22	FBgn0036152	Dyro	CG6175	CG6175-GFP	Kevin White goat-anti-GFP-UC	embryonic	TF co-regulator	3694		2018
23	FBgn0000629	E(z)	E(z)	E(z)-GFP	Kevin White goat-anti-GFP-UC	prepupa	chromatin factor	6838		2018
24	FBgn0004858	elB	elB	elB-GFP	Abcam ab290	embryonic	basal TF	8564		2024
25	FBgn0263934	esn	esn	esn-GFP	Kevin White goat-anti-GFP-UC	prepupa	Protein binding	13700		2018
26	FBgn0001139	gro	gro	gro-GFP	Kevin White goat-anti-GFP-UC	embryonic	TF co-regulator	6323		2018
27	FBgn0001169	H	H	H-GFP	Abcam ab290	embryonic	TF co-regulator	2717		2024
28	FBgn0001206	Hmr	Hmr	Hmr-GFP	Kevin White goat-anti-GFP-UC	embryonic	chromatin factor	6071		2018
29	FBgn0085451	htk	CG34422	CG34422-GFP	Kevin White goat-anti-GFP-UC	embryonic	chromatin factor	7431		2018
30	FBgn0036004	Jarid2	Jarid2	Jarid2-GFP	Kevin White goat-anti-GFP-UC	embryonic	chromatin factor	4981		2018
31	FBgn0034217	Lhr	Lhr	Lhr-GFP	Kevin White goat-anti-GFP-UC	embryonic	chromatin factor	3660		2018
32	FBgn0263667	Lpt	Lpt	13T-exd-GFP	Kevin White goat-anti-GFP-UC	embryonic	chromatin factor	486		2018
33	FBgn0263667	Lpt	Lpt	Lpt-GFP	non-commercial Lpt modENCODE antibody 1	prepupa	chromatin factor	5990		2018
34	FBgn0002643	mam	mam	mam-MiMIC-GFP	Kevin White goat-anti-GFP-UC	embryonic	TF co-regulator	4644		2018
35	FBgn0002781	mod(mdg4)	mod(mdg4)	mod(mdg4)-GFP	Kevin White goat-anti-GFP-UC	wandering third instar larva	TF co-regulator	4148		2018
36	FBgn0004647	N	N	Notch-GFP	Abcam ab290	wandering third instar larva	TF co-regulator	1439		2018
37	FBgn0011817	nmo	nmo	nmo-GFP	Kevin White goat-anti-GFP-UC	embryonic	kinase	9602		2024
38	FBgn0005771	noc	noc	noc	Kevin White goat-anti-GFP-UC	larva	basal TF	10954		2018
39	FBgn0036124	Noc1	CG7839	CG7839	Kevin White goat-anti-GFP-UC	embryonic	Protein binding	9149		2018
40	FBgn0261015	Pif1A	Pif1A	Pif1A-GFP	Kevin White goat-anti-GFP-UC	pupa	Protein binding	9725		2018
41	FBgn0046874	Pif1B	Pif1B	Pif1B-GFP	Kevin White goat-anti-GFP-UC	pupa	Protein binding	7859		2018
42	FBgn0034726	PolE4	Mes4	Mes4-GFP	Kevin White goat-anti-GFP-UC	embryonic	DNA replication	2907		2018
43	FBgn0003165	pum	pum	Pum-MiMIC-GFP	Kevin White goat-anti-GFP-UC	embryonic	RNA binding	3565		2018
44	FBgn0262937	Rabex-5	Rabex-5	CG9139-GFP	Kevin White goat-anti-GFP-UC	prepupa	Guanine Nucleotide Exchange Factors	4453		2018
45	FBgn0038128	Ravus	Ravus	Ravus-GFP	Kevin White goat-anti-GFP-UC	embryonic	TF co-regulator	1653		2024
46	FBgn0022764	Sin3A	Sin3A	Sin3A-GFP	non-commercial Sin3A modENCODE antibody 1	embryonic	Chromatin factor	371		2018
47	FBgn0022764	Sin3A	Sin3A	yellow cinnabar brown speck	non-commercial Sin3A modENCODE antibody 1	embryonic	Chromatin factor	4138		2018
48	FBgn0033358	spab	spab	CG8216-GFP	Kevin White goat-anti-GFP-UC	prepupa	Neuropeptide	8786		2018
49	FBgn0010278	Ssrp	Ssrp	Ssrp-GFP	Kevin White goat-anti-GFP-UC	embryonic	chromatin factor	7511		2018
50	FBgn0003612	Su(var)2-10	Su(var)2-10	Suvar2-10-GFP	Kevin White goat-anti-GFP-UC	embryonic	Transferase	1234		2018
51	FBgn0026427	Su(var)2-HP2	Su(var)2-HP2	Su(var)2-HP2	Kevin White goat-anti-GFP-UC	embryonic	Chromatin factor	3466		2018
52	FBgn0003607	Su(var)205	Su(var)205	yellow cinnabar brown speck	Abcam ab24726	embryonic	Chromatin factor	89		2018
53	FBgn0003607	Su(var)205	Su(var)205	yellow cinnabar brown speck	Abcam ab24726	embryonic	Chromatin factor	423		2018
54	FBgn0003607	Su(var)205	Su(var)205	yellow cinnabar brown speck	Covance PRB-291C	embryonic	Chromatin factor	400		2018
55	FBgn0003598	Su(var)3-7	Su(var)3-7	Su(var)3-7-GFP	Kevin White goat-anti-GFP-UC	embryonic	Chromatin factor	6440		2018
56	FBgn0263755	Su(var)3-9	Su(var)3-9	yellow cinnabar brown speck	Abcam ab4811	embryonic	chromatin factor	4472		2018
57	FBgn0010355	Taf1	Taf1	Taf1-GFP	Kevin White goat-anti-GFP-UC	embryonic	basal TF	2665		2018
58	FBgn0003687	Tbp	Tbp	13T-exd-GFP	non-commercial Tbp modENCODE antibody 1	embryonic	basal TF	2296		2018
59	FBgn0026160	tna	tna	tna-GFP	Abcam ab290	embryonic	Transferase	3500		2018
60	FBgn0034970	yki	yki	yellow cinnabar brown speck	non-commercial cad modENCODE antibody 1	embryonic	TF co-regulator	1141		2018
61	FBgn0032321	YL-1	YL-1	YL-1-GFP	Kevin White goat-anti-GFP-UC	embryonic	chromatin factor	5820		2018
62	FBgn0033762	ZnT49B	ZnT49B	CG8632-GFP	Kevin White goat-anti-GFP-UC	prepupa	Membrane protein	6495		2018

## Sheet: S4.Fly TF strains not ChiPd
	Flybase ID	Flybase symbol	Strain	Domain	Reason
1	FBgn0265574	Cdc5	Cdc5-GFP	SANT-MYB	not collected
2	FBgn0034945	CG10904	CG10904-GFP	MADF	failed
3	FBgn0027503	CG11970	CG11970-GFP	WH	not collected
4	FBgn0038547	CG17803	CG17803-GFP	ZF C2H2	failed
5	FBgn0035691	CG7386	CG7386-GFP	ZF C2H2	failed
6	FBgn0000520	dwg	dwg-GFP	ZF C2H2	not collected
7	FBgn0000227	Elba1	Elba1-GFP	BEN	not collected
8	FBgn0000611	exd	exd-GFP	HD	failed
9	FBgn0026575	hang	hang-GFP	ZF C2H2	not collected
10	FBgn0001319	kn	kn-GFP	ZF C5	failed
11	FBgn0026411	Lim1	Lim1-GFP	HD LIM	failed
12	FBgn0027951	MTA1-like	MTA1-like-GFP	SANT-MYB, ZF GATA	not collected

## Sheet: S5.Fly TFs without strains
	Flybase ID	Flybase symbol	Domain	Notes
1	FBgn0000179	bi	T-box
2	FBgn0000233	btd	ZF C2H2
3	FBgn0259176	bun	TSC22/Bun
4	FBgn0011723	byn	T-box
5	FBgn0039831	CG12054	ZF C2H2
6	FBgn0030952	CG12609	MADF
7	FBgn0051612	CG31612	ZF C2H2
8	FBgn0051875	CG31875	SANT-MYB
9	FBgn0054031	CG34031	HD
10	FBgn0039078	CG4374	ZF C2H2
11	FBgn0029939	Cph	ZF C2H2
12	FBgn0004198	ct	HD
13	FBgn0263239	dar1	ZF C2H2
14	FBgn0000459	disco	ZF C2H2
15	FBgn0028789	Doc1	T-box
16	FBgn0000492	Dr	HD
17	FBgn0008646	E5	HD
18	FBgn0001077	ftz	HD - HOX
19	FBgn0267336	Glut4EF	ZF C2H2
20	FBgn0030899	Hesr	bHLH
21	FBgn0001235	hth	HD	We have ChIP data for this gene using an antibody to HTH
22	FBgn0008651	lbl	HD
23	FBgn0033458	Lime	ZF C2H2
24	FBgn0052105	Lmx1a	HD - LIM
25	FBgn0267033	mamo	ZF C2H2
26	FBgn0263112	Mitf	bHLH
27	FBgn0003002	opa	ZF C2H2
28	FBgn0037540	Pbp95	SANT-MYB
29	FBgn0003117	pnr	GATA
30	FBgn0003129	Poxm	HD - PRD
31	FBgn0023489	Pph13	HD
32	FBgn0015799	Rbf
33	FBgn0038390	Rbf2
34	FBgn0004795	retn	ARID
35	FBgn0083981	RunxA	Runt
36	FBgn0265523	Smr	SANT-MYB
37	FBgn0036411	Sox21a	HMG box
38	FBgn0042630	Sox21b	HMG box
39	FBgn0003507	srp	ZF GATA
40	FBgn0038979	tHMG2	HMG box
41	FBgn0003866	tsh	ZF C2H2
42	FBgn0003944	Ubx	HD - HOX
43	FBgn0033748	vis	HD

## Sheet: S6.Worm TFs
	Sequence_name	Gene_name	Strain	ChIP-seq completed (Yes/No)	Reason
1	2L52.1	2L52.1		No	Active
2	F32A5.1	ada-2	OP684	No	Cytoplasmic
3	C25A1.11	aha-1	OP124, OP300	Yes
4	C41G7.5	ahr-1	OP562	Yes
5	R08B4.2	alr-1	OP200, OP362	Yes
6	K06A1.1	aptf-1	OP584, OP585	No	Cytoplasmic
7	Y62E10A.17	aptf-2	RW12304	Yes
8	F28C6.2	aptf-3	OP765	Yes
9	F28C6.1	aptf-4	RW12286	No	Insufficient Expression
10	Y108G3AL.7	arid-1	RW12194, RW12200	Yes
11	T08H4.3	ast-1	RW12175	No	Failed ChIP-seq multiple times, discontinued
12	K08F8.2	atf-2	RW12307	No	Insufficient Expression
13	T04C10.4	atf-4		No	Active, changed from atf-5
14	F45E6.2	atf-6	OP683	No	Cytoplasmic
15	C07G2.2	atf-7	OP638	Yes
16	F17A9.3	atf-8		No	Active
17	ZC376.7	atfs-1	OP675	No	Cytoplasmic
18	C44B9.4	athp-1	OP685, OP691	Yes
19	Y116A8C.22	athp-3	OP582, OP583	No	Cytoplasmic
20	F09G2.9	attf-2	OP657	No	Failed multiple times
21	F54C4.3	attf-3	RW12296	Yes
22	C05D10.1	attf-4	OP219, OP220	Yes
23	T04G9.1	attf-5	OP724	Yes
24	Y18D10A.1	attf-6	RW12231	Yes
25	B0019.2	B0019.2	RW12288	Yes
26	B0261.1	B0261.1	OP662	Yes
27	B0310.2	B0310.2	OP641, OP642	Yes
28	B0336.7	B0336.7	OP714	No	Failed multiple times
29	bcl-11	bcl-11	OP471, OP472	Yes
30	Y39B6A.12	bed-1	RW12201	Yes
31	Y47D3B.9	bed-2	RW12335	Yes
32	F25H8.6	bed-3	OP651	Yes
33	F25D7.3	blmp-1	OP109, DCC4036	Yes
34	F55C5.11	bnc-1	OP751	No	Cytoplasmic
35	C02F5.12	C02F5.12	OP772	No	Failed multiple times, discontinued
36	C04F5.9	C04F5.9	OP525	Yes
37	C06E2.1	C06E2.1		No	Active
38	C09F5.3	C09F5.3		No	Active
39	C16A3.4	C16A3.4	OP337, OP345	Yes
40	C27A12.2	C27A12.2		No	Active
41	C27A2.7	C27A2.7		No	Active
42	C28G1.4	C28G1.4	OP630	No	No expression
43	C30G4.4	C30G4.4		No	Re-annotated gene, Active
44	C33H5.17	C33H5.17	OP570	No	Failed multiple times
45	C34B4.2	C34B4.2	OP552	Yes
46	C38D4.7	C38D4.7	OP708	Yes
47	C46E10.8	C46E10.8		No	Low DCPM
48	T05C1.4	camt-1	OP648	No	Cytoplasmic
49	W05B10.2	ccch-3	OP628	Yes
50	D1005.3	cebp-1	OP563, OP576, RW12290	Yes
51	C48E7.11	cebp-2	OP329, OP330, OP331 (Dead)	Yes
52	F16H11.4	ceh-1	OP150, OP571 (strain ChIP'd)	No	Failed multiple times
53	W03A3.1	ceh-10	RW12170 (strain ChIP'd), RW12171	No	Failed multiple times
54	Y38E10A.6	ceh-100	RW12233	Yes
55	F33D11.4	ceh-12		No	Active
56	R13A5.5	ceh-13	OP756	Yes
57	F46C8.5	ceh-14	OP315	Yes
58	C13G5.1	ceh-16	OP82	Yes
59	D1007.1	ceh-17		No	Active
60	ZC64.3	ceh-18	OP533	Yes
61	F20D12.6	ceh-19	OP739	Yes
62	C27A12.5	ceh-2	OP323	Yes
63	F31E3.1	ceh-20	RW12163, RW12164, RW12165. RW12211	Yes
64	T26C11.6	ceh-21	OP103	No	Insufficient Expression
65	F29F11.5	ceh-22	OP389	Yes
66	ZK652.5	ceh-23	OP767	No	Failed multiple times, insufficient expression
67	F55B12.1	ceh-24	OP157, OP158, OP673	Yes
68	F46F3.1	ceh-27	OP135, OP136, OP139	Yes
69	K03A11.3	ceh-28		No	Active
70	C33D12.7	ceh-30	OP120	Yes
71	C33D12.1	ceh-31	OP370	Yes
72	W05E10.3	ceh-32	OP516	Yes
73	C10G8.7	ceh-33	OP187, OP575	No	Cytoplasmic
74	C10G8.6	ceh-34	OP524	Yes
75	C37E2.4	ceh-36	OP620, OP663, OP674	Yes
76	C37E2.5	ceh-37	OH16345	Yes
77	F22D3.1	ceh-38	OP241	Yes
78	T26C11.7	ceh-39	OP169, DCC3858	Yes
79	F17A2.5	ceh-40	OP232, OP233	Yes
80	T26C11.5	ceh-41	OP759	No	Failed ChIP-seq poor binding, discontinued
81	C28A5.4	ceh-43	OP699	Yes
82	Y54F10AM.4	ceh-44	RW12327	Yes
83	ZK993.1	ceh-45	RW12292	Yes
84	C17H12.9	ceh-48	OP631	Yes
85	F17A9.6	ceh-49	OP771	No	Failed ChIP-seq multiple times, discontinued
86	C16C2.1	ceh-5	PHX1592	Yes
87	Y80D3A.3	ceh-51	PHX1551	Yes
88	C09G12.1	ceh-53	OP444, OP445, OP446	No	Low DCPM
89	T13C5.4	ceh-54	OP456	No	Low DCPM
90	C07E3.5	ceh-57	OP706	No	Insufficient Expression
91	C07E3.6	ceh-58	OP808	Yes
92	K02B12.1	ceh-6	OP748, OP87	Yes
93	F22A3.5	ceh-60		No	Active
94	R06F6.6	ceh-62	OP416	Yes
95	C02F12.10	ceh-63	OP742	Yes
96	C34C6.8	ceh-7	OP168	No	Low DCPM
97	ZC376.4	ceh-74	OP680	No	Failed multiple times
98	C50H2.6	ceh-75	PHX1884	No	Cytoplasmic
99	C26E1.3	ceh-79	OP553	Yes
100	ZK265.4	ceh-8	OP760	Yes
101	F45C12.3	ceh-81		No	Low DCPM
102	F45C12.2	ceh-82	OP212	Yes
103	F45C12.15	ceh-83	OP727	Yes
104	C40D2.4	ceh-84		No	Low DCPM
105	F42G2.6	ceh-86	RW12297, RW12298	No	Cytoplasmic
106	F34D6.2	ceh-87	PHX1955	No	Insufficient Expression
107	C49C3.5	ceh-88	OP593	Yes
108	F28H6.2	ceh-89	OH16505	Yes	ChIP-seq completed after October 2022
109	Y65B4BR.9	ceh-9	OP202, OP690	Yes
110	R03E1.4	ceh-90	OP210	Yes
111	Y66A7A.5	ceh-91	RW12305	Yes
112	R04A9.5	ceh-93		No	Active
113	T21B4.17	ceh-99		No	Active
114	F52B5.5	cep-1	OP793	No	Failed multiple times
115	F43G9.11	ces-1	OP174	Yes
116	ZK909.4	ces-2	RW12328	No	Fail multiple times, poor expression, discontinued
117	F33A8.3	cey-1	OP375, OP302	No	Cytoplasmic
118	M01E11.5	cey-3	OP671	No	Cytoplasmic
119	T23D8.8	cfi-1	RW12195	No	ChIP-seq not attempted
120	C55B7.12	che-1	OP677, OP654, OP669, OP718	Yes
121	C15C8.2	cky-1		No	Active
122	C34E10.7	cnd-1	OP349	Yes
123	R03C1.3	cog-1	OP541	Yes
124	Y41C4A.4	crh-1	RW12338	Yes	ChIP-seq completed after October 2022
125	C27D6.4	crh-2	OP425	Yes
126	F49E10.5	ctbp-1	RW12203	Yes
127	D1046.2	D1046.2	OP397	Yes
128	D1081.8	D1081.8	OP183	No	Cytoplasmic
129	D2030.7	D2030.7	RW12302	Yes
130	D2092.10	D2092.10		No	Inappropriate Expression
131	B0412.1	dac-1		No	Active
132	F11A1.3	daf-12	OP167, OP222	Yes
133	R13H8.1	daf-16	ZM8745, ZM7247, XE1464	Yes
134	F33H1.1	daf-19	OP794, OP795	Yes
135	F25E2.5	daf-3	RW12204, RW12205	No	Cytoplasmic
136	R05D11.1	daf-8	OP790	Yes
137	C18D1.1	die-1	OP128, RW10316, RW10317	Yes
138	C34D1.1	dmd-10		No	OP689 contained crh-2 and dmd-10	dmd-10 re-annotated to include dmd-11
139	Y43F8C.10	dmd-3	OH15733, RW12247	No	Male expression
140	C27C12.6	dmd-4	OP418, OP419, OP420	Yes
141	F10C1.5	dmd-5	OP115	No	Failed ChIP-seq multiple times
142	F13G11.1	dmd-6	RJP5356	Yes
143	K08B12.2	dmd-7	OP495	No	Cytoplasmic
144	T22H9.4	dmd-8	OP775	Yes
145	Y67D8A.3	dmd-9	RJP5357	Yes
146	F38A5.13	dnj-11	RW12337	No	Cytoplasmic
147	T03F6.2	dnj-17	OP492, OP498	No	Cytoplasmic
148	Y52B11A.9	dox-1	RW12180	Yes
149	C28H8.9	dpff-1	OP579	Yes
150	T23G7.1	dpl-1	OP105, OP365, YL390, YL425, YL448, YL507	Yes
151	R10D12.2	dpr-1		No	Low DCPM
152	F40F9.7	drap-1	OP700	Yes
153	C18B12.3	dsc-1	OP522	Yes
154	ZC204.2	duxl-1	OP469, OP470	Yes
155	ZK1193.5	dve-1	OP398	Yes
156	Y102A5C.18	efl-1	YL424, YL478, YL479, YL445, YL418	Yes
157	Y48C3A.17	efl-2	RW12354	No	Pending
158	F49E12.6	efl-3	OP344	Yes
159	T22B7.1	egl-13	GOU883	Yes
160	F55A8.1	egl-18	RW12252,RW12253	Yes
161	C04A2.3	egl-27	OP177	Yes
162	C04G2.7	egl-38	OP171	Yes	ChIP-seq completed after October 2022
163	R53.3	egl-43	RW12181, RW12182, RW12813	Yes
164	F28B12.2	egl-44	RW12173	Yes
165	K11G9.4	egl-46		No	Active
166	C08C3.1	egl-5	RW10456 (aka OP54), RW10457, RW10464, RW10465, DCC3159	Yes
167	C27C12.2	egrh-1		No	Low DCPM
168	Y55F3AM.7	egrh-2		No	Active
169	Y94H6A.11	egrh-3	RW12196 (strain ChIP'd), RW12202	Yes
170	ZK616.10	ehn-3		No	Active
171	Y105E8A.17	ekl-4	RW12207	Yes
172	C24A1.2	elf-1		No	Active
173	W09C2.1	elt-1	OP354	Yes
174	C33D3.1	elt-2	RW10136, RW10453 (aka OP56), RW10454	Yes
175	K02B9.4	elt-3	OP551, OP559, OP75	Yes
176	C39B10.6	elt-4	OP111, OP112	Yes
177	F52C12.5	elt-6		No	Active
178	C18G1.2	elt-7	RW10455 (aka OP52)	No	Strain had a phenotype
179	F58E10.2	end-1	RW12352	Yes	ChIP-seq completed after October 2022
180	F58E10.5	end-3	OP780	No	Insufficient expression
181	R11E3.6	eor-1	OP350, OP80, OP81, DCC3160	Yes
182	F22A3.1	ets-4	OP509, RAF1713	Yes
183	C42D8.4	ets-5	OP809	Yes
184	F19F10.5	ets-7	OP486, OP487	Yes
185	C50A2.4	ets-8		No	Active
186	C52B9.2	ets-9	OP613	No	Low DCPM
187	Y53C12C.1	eyg-1	OP441, OP442, OP443	Yes
188	F10B5.3	F10B5.3	OP529	Yes
189	F10E7.11	F10E7.11	OP658,OP725	Yes
190	F19F10.1	F19F10.1	RW12347	No	Cytoplasmic
191	F21A10.2	F21A10.2	OP710	No	Cytoplasmic
192	F21A9.2	F21A9.2		No	Cytoplasmic
193	F21D5.4	F21D5.4		No	Active
194	F21D5.9	F21D5.9	OP386	No	Insufficient Expression
195	F21G4.5	F21G4.5	OP607	No	Low DCPM
196	F22D6.2	F22D6.2	OP399	Yes
197	F23B12.7	F23B12.7	OP429, OP430	Yes
198	F26A10.2	F26A10.2		No	Active
199	F26F4.8	F26F4.8	OP776	Yes
200	F27D4.6	F27D4.6		No	Active
201	F33H1.4	F33H1.4	RW12303	Yes
202	F37B4.10	F37B4.10	OP374	Yes
203	F39B2.1	F39B2.1	RW12232	Yes
204	F40G9.14	F40G9.14	OP633	No	Cytoplasmic
205	F44D12.10	F44D12.10		No	Low DCPM
206	F44E2.7	F44E2.7	OP381	Yes
207	F47E1.3	F47E1.3		No	Low DCPM
208	F52B5.7	F52B5.7	OP606	Yes
209	F54F2.9	F54F2.9	OP695	No	Cytoplasmic
210	F56D1.1	F56D1.1		No	Active
211	F57C9.4	F57C9.4	OP213, OP550	Yes
212	F58G1.2	F58G1.2	RW12350	No	Discontinued, wrong expression pattern
213	F56E3.4	fax-1	OP164, OP165, OP166	Yes
214	Y38H8A.5	fezf-1		No	Active
215	C25A1.2	fkh-10	OP191, OP377, OP378, DCC4025, DCC4027, DCC4028	Yes
216	T14G12.4	fkh-2	OP172, OP185	Yes
217	C29F7.4	fkh-3	OP376, OP574, OP594	Yes
218	C29F7.5	fkh-4	OP100, OP108	Yes
219	F26A1.2	fkh-5		No	Active
220	B0286.5	fkh-6	OP78, OP79	Yes
221	F26D12.1	fkh-7	OP711, PS9154(strain ChIP'd)	Yes
222	F40H3.4	fkh-8	OP652	Yes
223	K03C7.2	fkh-9	RW12356	No	ChIP-seq not attempted
224	Y11D7A.12	flh-1	OP702	Yes
225	C26E6.2	flh-2	OP504	No	Low DCPM
226	Y11D7A.13	flh-3		No	Active
227	F29G9.4	fos-1	OP304	Yes
228	W10D5.3	gei-17	OP572	Yes
229	T22H6.6	gei-3	OP180, OP800	No	Low DCPM
230	C14B9.6	gei-8	OP589	Yes
231	C01B12.2	gmeb-1	OP343	Yes
232	F53H4.5	gmeb-2	OP621, OP622	Yes
233	C44F1.2	gmeb-3		No	Active
234	Y48G8AR.1	grh-1	RW12208	Yes
235	H16D19.3	H16D19.3		No	Low DCPM
236	F53B2.6	ham-1		No	Active
237	C07A12.1	ham-2	OP639	Yes
238	F13D11.2	hbl-1	OP160	No	Insufficient expression
239	F38A6.3	hif-1	OR3350	Yes
240	T09E8.2	him-17		No	Active
241	B0304.1	hlh-1	RW10427 (aka OP45), RW10436 (aka OP44), OP64	Yes
242	ZK682.4	hlh-10		No	Active
243	F58A4.7	hlh-11	OP396	Yes
244	C28C12.8	hlh-12	OP538	Yes
245	F48D6.3	hlh-13	OP744, OP747	Yes
246	C18A3.8	hlh-14	RW12346	No	Insufficient Expression
247	C43H6.8	hlh-15	OP566	Yes
248	DY3.3	hlh-16		No	Active
249	F38C2.2	hlh-17	OP643	Yes
250	F57C12.3	hlh-19		No	Active
251	M05B5.5	hlh-2	OP712	No	Cytoplasmic
252	C17C3.7	hlh-25	OP61	No	Insufficient expression
253	C17C3.8	hlh-26	RW12174	Yes
254	C17C3.10	hlh-27		No	Active
255	F31A3.2	hlh-28		No	Active
256	F31A3.4	hlh-29		No	Active
257	T24B8.6	hlh-3	OP650	No	Cytoplasmic
258	W02C12.3	hlh-30	OP433	Yes
259	F38C2.8	hlh-31		No	Low DCPM
260	Y105C5B.29	hlh-32	RW12256	No	Insufficient Expression
261	Y39A3CR.6	hlh-33		No	Active
262	T01D3.2	hlh-34		No	Active
263	T05G5.2	hlh-4	OP523, OP599	Yes
264	T15H9.3	hlh-6	RW10702	Yes
265	C02B8.4	hlh-8	RW10468 (aka OP63), OP347, OP64	Yes
266	F54A5.1	hmbx-1	OP655, OP656	Yes
267	Y48B6A.14	hmg-1.1	RW12311	Yes
268	T05A7.4	hmg-11	TH184	Yes
269	Y17G7A.1	hmg-12		No	Active
270	W02D9.3	hmg-20	RW12240	Yes
271	C32F10.5	hmg-3	RW12357	No	ChIP-seq not attempted, N-terminally tagged
272	T20B12.8	hmg-4	OP660	Yes
273	F45E4.9	hmg-5	RW12217	No	Cytoplasmic
274	F47G4.6	hmg-6		No	Active
275	C44C10.8	hnd-1	OP573	Yes
276	Y53C10A.12	hsf-1	RW12254, RW12258	Yes
277	C36F7.1	irx-1	OP536, OP540	Yes
278	T24H10.7	jun-1	OP234	Yes
279	K04C1.3	K04C1.3	OP717	No	Low DCPM
280	K05F1.5	K05F1.5	OP499, OP501	No	Low DCPM
281	K09A11.1	K09A11.1	OP371, OP372	Yes
282	K09H9.7	K09H9.7		No	Active
283	K10B3.5	K10B3.5	OP668, OP734	No	Low DCPM
284	K11D12.12	K11D12.12		No	Active
285	K11D2.4	K11D2.4	RW12320, RW12321	Yes
286	K12H6.12	K12H6.12	OP214	Yes
287	F56F11.3	klf-1		No	Active
288	F53F8.1	klf-2	RW12310	Yes
289	F54H5.4	klf-3	OP755	No	Failed ChIP-seq multiple times, discontinued
290	K08B4.1	lag-1	OP591, RW12314, RW12315	Yes
291	F26B1.7	let-381	OP119, OP122, OP123	No	Insufficient expression
292	C01G8.9	let-526	RW12306	Yes
293	F57B10.1	let-607	YL529	Yes
294	ZC8.4	lfi-1	OP732	No	Cytoplasmic
295	ZC64.4	lim-4	OP681, OP697, OP704	No	Cytoplasmic
296	K03E6.1	lim-6	OP387, OP388	Yes
297	C04F1.3	lim-7	OP779	Yes
298	C37F5.1	lin-1	RW12212	Yes
299	ZC247.3	lin-11	OP348, OP62	Yes
300	C03B8.4	lin-13	RW10451 (aka OP49), RW10452 (aka OP51)	Yes
301	T25C12.1	lin-14	OP768	Yes
302	ZK662.4	lin-15B	OP184	Yes
303	Y54G2A.1	lin-22		No	Active
304	F18A1.2	lin-26	RW12178, RW12179	Yes
305	F02E9.2	lin-28	OP535	No	Cytoplasmic
306	W03C9.4	lin-29	RW12227	Yes
307	K10G6.1	lin-31		No	Active
308	T14F9.5	lin-32	OP740	Yes
309	F44B9.6	lin-36	RW12355	No	ChIP-seq not attempted
310	Y48E1B.7	lin-38	RW12236	Yes
311	C07H6.7	lin-39	RW10311 OP18, DCC4032	Yes
312	T27C4.4	lin-40	OP485	Yes
313	F34D10.5	lin-48		No	Active
314	JC8.6	lin-54	OP743	Yes
315	F18A1.3	lir-1	RW12318	Yes
316	F18A1.4	lir-2	OP175	No	Failed multiple times
317	F37H8.1	lir-3	OP312, OP313, OP314	Yes
318	F52F12.4	lsl-1	OP720	Yes
319	C52E12.6	lst-5	OP733	No	OP733 had a phenotype, Active
320	R07B5.9	lsy-12	OP568	Yes
321	F49H12.1	lsy-2	OP367, OP240	Yes
322	F47H4.1	lsy-27	OP400, OP401	Yes
323	M03D4.4	M03D4.4	OP696	Yes
324	C32C4.5	mab-23		No	Low DCPM
325	Y53C12B.5	mab-3	OH15732 (strain ChIP'd), RW12246	No	Failed ChIP
326	C08C3.3	mab-5	RW10309, RW10320, OP27, DCC4639	Yes
327	T27A1.6	mab-9	RW12257	Yes
328	Y55F3BR.5	madf-1	RW12345	Yes	ChIP-seq completed after October 2022
329	Y106G6H.4	madf-10	OP508	Yes
330	C05D2.6	madf-11	OP798	No	Failed multiple times, poor expression, discontinued
331	F36D1.1	madf-2	OP587	Yes
332	H20J04.3	madf-3	RW12241	Yes
333	T07C12.11	madf-4		No	Active
334	C01G12.1	madf-5	OP435, OP436, OP452, RW12308, RW12309	Yes
335	C54G6.1	madf-6	RW12237	Yes
336	C46F11.3	madf-8	RW12322, RW12323	Yes
337	ZC416.1	madf-9	RW12324, RW12325	Yes
338	F45H11.6	maf-1		No	Active
339	H21P03.1	mbf-1	OP379, OP426, OP427	Yes
340	K02H8.1	mbl-1	OP664	No	Insufficient expression, failed IDR numerous times, discontinued
341	T01C1.2	mbr-1	OP595, OP596	No	Cytoplasmic
342	Y51H1A.6	mcd-1	RW12215, RW12216	Yes
343	R03E9.1	mdl-1	OP106, OP355	Yes
344	F01D4.6	mec-3	RW10469 (aka OP55)	Yes
345	T24D3.1	med-1	OP390, OP391	Yes
346	K04C2.6	med-2	RW10426 (aka OP53), RW10450 (aka OP48)	No	Cytoplasmic
347	W10D5.1	mef-2	OP301	Yes
348	C38D4.3	mel-28	OP646	Yes
349	M04B2.1	mep-1	OP104, OP107, OP91, OP70	Yes
350	R13.4	miz-1	OP693	No	Cytoplasmic
351	H14A12.4	mls-1	OP686, OP694 (strain ChIP'd)	No	Failed multiple times
352	C39E6.4	mls-2	OP645	Yes
353	T20B12.6	mml-1	OP198, OP527	Yes
354	C10A4.8	mnm-2		No	Active
355	T19B10.11	mxl-1	OP537, OP545	Yes
356	F40G9.11	mxl-2	RW12316 (strain ChIP'd), RW12317	Yes
357	F46G10.6	mxl-3	OP745	Yes
358	ZK1290.4	nfi-1		No	Active
359	C16A3.7	nfx-1	OP507	No	Cytoplasmic
360	T08D10.1	nfya-1	OP404, OP424	Yes
361	Y53H1A.5	nfya-2	RW12238	Yes
362	W10D9.4	nfyb-1	RW12190, RW12191, RW12192	Yes
363	F23F1.1	nfyc-1	RW12333	Yes	ChIP-seq completed after October 2022
364	Y69A2AR.29	ngn-1		No	Active
365	R09G11.2	nhr-1		No	nhr
366	B0280.8	nhr-10	OP239	Yes
367	C28D4.1	nhr-100	OP366, OP392, OP393	No	nhr
368	H12C20.6	nhr-101		No	nhr
369	T06C12.6	nhr-102	OP439, OP440, OP463	Yes
370	F44C8.4	nhr-103		No	nhr
371	R11E3.5	nhr-104		No	nhr
372	C06G3.1	nhr-105		No	nhr
373	T01G6.4	nhr-106		No	nhr
374	C33G8.11	nhr-107		No	nhr
375	F35E8.12	nhr-108		No	nhr
376	T12C9.5	nhr-109		No	nhr
377	ZC410.1	nhr-11	OP305	Yes
378	Y46H3D.5	nhr-110		No	nhr
379	F44G3.9	nhr-111	OP306, OP569	Yes
380	Y70C5C.6	nhr-112	OP364	No	nhr
381	ZK1025.9	nhr-113		No	nhr
382	Y45G5AM.1	nhr-114		No	nhr
383	T27B7.4	nhr-115		No	nhr
384	F09C6.9	nhr-116	OP226	No	Cytoplasmic
385	F16B4.12	nhr-117		No	nhr
386	F13A2.8	nhr-118		No	nhr
387	K12H6.1	nhr-119		No	nhr
388	R04B5.4	nhr-12	OP318, OP319	Yes
389	C25B8.6	nhr-120	OP415 (strain ChIP'd), OP423	Yes
390	E02H9.8	nhr-121		No	nhr
391	Y41D4B.9	nhr-122		No	nhr
392	M02H5.7	nhr-123		No	nhr
393	C17E7.8	nhr-124	OP417	No	Low DCPM
394	R02D1.1	nhr-125		No	nhr
395	F44C8.10	nhr-126		No	nhr
396	T13F3.3	nhr-127	OP409, OP410	No	nhr
397	F44C8.5	nhr-128		No	nhr
398	C50B6.14	nhr-129	OP339, OP340, OP178	Yes
399	Y5H2B.2	nhr-13		No	nhr
400	T01G6.8	nhr-130	OP505	No	Cytoplasmic
401	T01G6.2	nhr-131		No	nhr
402	R11G11.1	nhr-132		No	nhr
403	F44C8.8	nhr-133		No	nhr
404	F44C8.2	nhr-134		No	nhr
405	VC5.5	nhr-135		No	nhr
406	C13C4.3	nhr-136	OP408	No	nhr
407	C56E10.4	nhr-137	OP758	No	Failed multiple times
408	C28D4.9	nhr-138		No	nhr
409	C33G8.8	nhr-139		No	nhr
410	T01B10.4	nhr-14		No	nhr
411	C33G8.9	nhr-140		No	nhr
412	F25E5.6	nhr-141		No	nhr
413	F44E7.8	nhr-142		No	nhr
414	F59E11.11	nhr-143		No	nhr
415	Y39B6A.47	nhr-145		No	nhr
416	C03G6.8	nhr-147		No	nhr
417	C03G6.10	nhr-148		No	nhr
418	C03G6.12	nhr-149	OP453, OP457	No	Cytoplasmic
419	F33E11.1	nhr-15		No	nhr
420	C06B8.1	nhr-150		No	nhr
421	C12D5.2	nhr-152		No	nhr
422	C13C4.1	nhr-153		No	nhr
423	C13C4.2	nhr-154	OP450	No	Cytoplasmic
424	C14C6.4	nhr-155		No	nhr
425	C17E7.1	nhr-156		No	nhr
426	C17E7.5	nhr-157		No	nhr
427	C17E7.6	nhr-158		No	nhr
428	C17E7.7	nhr-159		No	nhr
429	T12C9.6	nhr-16		No	nhr
430	C33G8.7	nhr-161		No	nhr
431	C33G8.10	nhr-162	OP466	No	Cytoplasmic
432	C33G8.12	nhr-163		No	nhr
433	C41G6.5	nhr-164		No	nhr
434	C47F8.2	nhr-165		No	nhr
435	C49D10.2	nhr-166		No	nhr
436	C49F5.4	nhr-167	OP458, OP459	No	Low DCPM
437	C50B6.8	nhr-168	OP412	No	Cytoplasmic
438	C54C8.1	nhr-169		No	nhr
439	C02B4.2	nhr-17		No	nhr
440	C54E10.5	nhr-170		No	nhr
441	C54F6.8	nhr-171		No	nhr
442	C54F6.9	nhr-172		No	nhr
443	C56E10.1	nhr-173		No	nhr
444	E03H4.6	nhr-174		No	nhr
445	F09F3.10	nhr-175		No	nhr
446	F14H3.11	nhr-176		No	nhr
447	F16B4.1	nhr-177		No	nhr
448	F16B4.9	nhr-178	OP454, OP455	No	Cytoplasmic
449	F16B4.11	nhr-179	OP465	Yes
450	F44C8.3	nhr-18		No	nhr
451	F31F4.12	nhr-180		No	nhr
452	F38H12.3	nhr-181		No	nhr
453	F41B5.9	nhr-182		No	nhr
454	F41B5.10	nhr-183		No	nhr
455	F44C8.9	nhr-184		No	nhr
456	F47C10.1	nhr-185		No	nhr
457	F47C10.3	nhr-186		No	nhr
458	F47C10.4	nhr-187		No	nhr
459	F47C10.7	nhr-188		No	nhr
460	F47C10.8	nhr-189		No	nhr
461	E02H1.7	nhr-19	OP791	Yes
462	F48G7.11	nhr-190	OP448	No	Cytoplasmic
463	F57A8.5	nhr-192		No	nhr
464	F57G8.6	nhr-193		No	nhr
465	F59E11.10	nhr-195	OP467	No	Low DCPM
466	K06B4.5	nhr-196		No	nhr
467	K06B4.7	nhr-197		No	nhr
468	K06B4.8	nhr-198		No	nhr
469	K06B4.10	nhr-199		No	nhr
470	C32F10.6	nhr-2	OP101, OP99, DCC3859	Yes
471	F43C1.4	nhr-20	OP515	Yes
472	M02H5.3	nhr-201	OP479	No	Cytoplasmic
473	M02H5.4	nhr-202		No	nhr
474	M02H5.5	nhr-203		No	nhr
475	R02C2.4	nhr-204		No	nhr
476	R04B5.3	nhr-205		No	nhr
477	R07B7.13	nhr-206		No	nhr
478	R07B7.14	nhr-207		No	nhr
479	R07B7.15	nhr-208		No	nhr
480	R07B7.16	nhr-209		No	nhr
481	F21D12.1	nhr-21	OP361	Yes
482	R11G11.12	nhr-210		No	nhr
483	T01G6.5	nhr-211		No	nhr
484	T01G6.6	nhr-212		No	nhr
485	T06C12.13	nhr-213		No	nhr
486	T07C5.3	nhr-214		No	nhr
487	T09D3.4	nhr-216	OP206	No	Cytoplasmic
488	T09E11.2	nhr-217		No	nhr
489	T13F3.2	nhr-218		No	nhr
490	T19A5.5	nhr-219		No	nhr
491	K06A1.4	nhr-22		No	nhr
492	T24A6.8	nhr-221		No	nhr
493	T24A6.11	nhr-222		No	nhr
494	T26E4.8	nhr-223		No	nhr
495	T27B7.2	nhr-225		No	nhr
496	T27B7.3	nhr-226		No	nhr
497	T27B7.5	nhr-227		No	nhr
498	T27B7.6	nhr-228		No	nhr
499	Y116A8C.18	nhr-229		No	nhr
500	C01H6.5	nhr-23	RW10391, OP43	Yes
501	Y17D7A.1	nhr-230		No	nhr
502	Y17D7B.1	nhr-231		No	nhr
503	Y22F5A.1	nhr-232	OP449, OP489, OP490, OP491	Yes
504	Y32B12B.6	nhr-233		No	nhr
505	Y38E10A.18	nhr-234		No	nhr
506	Y46H3D.6	nhr-237	OP228	Yes
507	Y46H3D.7	nhr-238		No	nhr
508	Y54F10AM.1	nhr-239
509	Y69H2.8	nhr-241		No	nhr
510	Y69A2AR.26	nhr-242		No	nhr
511	Y80D3A.4	nhr-243		No	nhr
512	ZK1025.10	nhr-245	OP211	No	nhr
513	ZK1037.5	nhr-247		No	nhr
514	ZK218.6	nhr-248		No	nhr
515	F11C1.6	nhr-25	OP356, OP33	Yes
516	ZK488.4	nhr-251		No	nhr
517	ZK6.2	nhr-252		No	nhr
518	ZK6.4	nhr-253		No	nhr
519	ZK6.5	nhr-254		No	nhr
520	ZK678.2	nhr-255		No	nhr
521	ZK697.2	nhr-256		No	nhr
522	C17A2.1	nhr-257		No	nhr
523	C26B2.4	nhr-258		No	nhr
524	T07C5.5	nhr-26		No	nhr
525	C38C3.9	nhr-260		No	nhr
526	C49D10.9	nhr-261		No	nhr
527	F09C6.8	nhr-262		No	nhr
528	F14A5.1	nhr-264		No	nhr
529	F41D3.3	nhr-265		No	nhr
530	H22D14.1	nhr-267		No	nhr
531	K06B4.6	nhr-268		No	nhr
532	R08H2.9	nhr-269		No	nhr
533	F16H9.2	nhr-27		No	nhr
534	R13D11.8	nhr-270	OP208, OP209	Yes
535	T03E6.3	nhr-271		No	nhr
536	T07C5.2	nhr-272		No	nhr
537	T12C9.1	nhr-273		No	nhr
538	Y41D4B.21	nhr-274		No	nhr
539	Y5H2A.2	nhr-275	OP225	No	Cytoplasmic
540	Y71A12C.1	nhr-276		No	nhr
541	Y94H6A.1	nhr-277		No	nhr
542	C11G6.4	nhr-28	OP317	Yes
543	F16B12.8	nhr-281		No	nhr
544	F57A10.6	nhr-283		No	nhr
545	T26E4.16	nhr-285		No	nhr
546	H01A20.1	nhr-3		No	nhr
547	C25E10.1	nhr-30	OP384	No	nhr
548	C26B2.3	nhr-31		No	nhr
549	K08H2.8	nhr-32		No	nhr
550	ZK455.6	nhr-33	OP394	No	nhr
551	F58G6.5	nhr-34		No	nhr
552	C07A12.3	nhr-35		No	nhr
553	F07C3.10	nhr-36		No	nhr
554	F44C4.2	nhr-37		No	nhr
555	K01H12.3	nhr-38		No	nhr
556	F44A2.4	nhr-39		No	nhr
557	F32B6.1	nhr-4		No	nhr
558	T03G6.2	nhr-40	RW12341	Yes	ChIP-seq completed after data freeze
559	Y104H12A.1	nhr-41	RW12221	Yes
560	C33G8.6	nhr-42	OP351 (strain ChIP'd), OP352, OP359	Yes
561	C29E6.5	nhr-43	OP464, OP477	Yes
562	T19A5.4	nhr-44		No	nhr
563	F16H11.5	nhr-45		No	nhr
564	C45E5.6	nhr-46		No	nhr
565	C24G6.4	nhr-47	OP481(strain ChIP'd), OP482	Yes
566	ZK662.3	nhr-48	OP518	Yes
567	K10C3.6	nhr-49		No	nhr
568	Y73F8A.21	nhr-5		No	nhr
569	C06C6.5	nhr-50		No	nhr
570	K06B4.1	nhr-51		No	nhr
571	K06B4.2	nhr-52		No	nhr
572	K06B4.11	nhr-53		No	nhr
573	F36D3.2	nhr-54		No	nhr
574	T01G6.7	nhr-55		No	nhr
575	F44C8.6	nhr-56		No	nhr
576	T05B4.2	nhr-57		No	nhr
577	R11G11.2	nhr-58		No	nhr
578	T27B7.1	nhr-59		No	nhr
579	C48D5.1	nhr-6	OP88, OP89, OP90	Yes
580	F57A10.5	nhr-60		No	nhr
581	W01D2.2	nhr-61		No	nhr
582	Y67A6A.2	nhr-62	OP402, OP404	No	nhr
583	C06C6.4	nhr-63	OP413, OP414	No	nhr
584	C45E1.1	nhr-64		No	nhr
585	Y17D7A.3	nhr-65		No	nhr
586	T09A12.4	nhr-66		No	nhr
587	C08F8.8	nhr-67	OP116, OP373, DCC4031	Yes
588	H12C20.3	nhr-68		No	nhr
589	T23H4.2	nhr-69		No	nhr
590	F54D1.4	nhr-7	OP310	No	nhr
591	Y51A2D.17	nhr-70		No	nhr
592	K11E4.5	nhr-71	OP480	Yes
593	C17A2.8	nhr-72		No	nhr
594	C27C7.4	nhr-73		No	nhr
595	C27C7.3	nhr-74		No	nhr
596	C05G6.1	nhr-76	OP203	Yes
597	T15D6.6	nhr-77	OP353	Yes
598	F36A4.14	nhr-78		No	nhr
599	T26H2.9	nhr-79		No	nhr
600	F33D4.1	nhr-8		No	Active
601	H10E21.3	nhr-80	OP460, OP461	Yes
602	C47F8.8	nhr-81		No	nhr
603	F41D3.1	nhr-82	OP421, OP422	No	nhr
604	T06C12.7	nhr-84	OP357	Yes
605	W05B5.3	nhr-85	OP539	Yes
606	Y40B10A.8	nhr-86		No	nhr
607	Y41D4B.7	nhr-87		No	nhr
608	K08A2.5	nhr-88		No	nhr
609	E03H4.13	nhr-89		No	nhr
610	ZK418.1	nhr-9		No	nhr
611	ZK488.2	nhr-90	OP411, OP483, OP484	Yes
612	Y15E3A.1	nhr-91		No	Active
613	Y41D4B.8	nhr-92		No	nhr
614	C12D5.8	nhr-94		No	nhr
615	Y39B6A.17	nhr-95		No	nhr
616	F44C8.11	nhr-96		No	nhr
617	H27C11.1	nhr-97		No	nhr
618	M02H5.6	nhr-98		No	nhr
619	M02H5.1	nhr-99		No	nhr
620	Y75B8A.2	nob-1		No	Active
621	F21D12.5	npax-1	OP626	No	Low DCPM
622	F48B9.5	npax-2	OP741	No	Insufficient expression
623	R13.2	npax-3		No	Inappropriate Expression
624	C09G9.7	npax-4	OP493	Yes
625	C18F3.4	nsy-7	RW12353	Yes
626	B0280.4	odd-1		No	Active
627	C34H3.2	odd-2	OP405	Yes
628	T18D3.2	odr-7	RW12342	No	Insufficient Expression
629	F45B8.4	pag-3	OP154(strain ChIP'd), OP163	Yes
630	C38D4.6	pal-1	OP380, OP94, OP95, OP96, OP97	No	No expression
631	T27B1.2	pat-9	RW12085	Yes
632	K07C11.1	pax-1	OP117(strain ChIP'd), OP118, DCC3856	Yes
633	K06B9.5	pax-2		No	Active
634	F27E5.2	pax-3	OP190	Yes
635	T14F9.4	peb-1	OP360, OP86(strain ChIP'd), OP98	Yes
636	T28H11.4	pes-1	RW12239	Yes
637	M6.3	pha-2	OP170, OP687(strain ChIP'd)	Yes
638	F38A6.1	pha-4	RW10310, RW10389 (aka OP47), DCC4033, OP37(strain ChIP'd), RW12220(strain ChIP'd)	Yes
639	Y75B8A.1	php-3	RW12213(strain ChIP'd), RW12214	Yes
640	W10C8.2	pop-1	OP560, OP770, JIM531(strain ChIP'd)	Yes
641	F40F8.7	pqm-1	OP201	Yes
642	C37A2.5	pqn-21		No	Active
643	F59B10.1	pqn-47,myrf-1	PHX2564	Yes	ChIP-seq completed after data freeze
644	K12H4.1	pros-1	RW10703 (aka OP500)	Yes
645	R02D3.7	R02D3.7	OP218	Yes
646	R05D3.3	R05D3.3		No	Active
647	R07E5.5	R07E5.5		No	Active
648	R10E4.11	R10E4.11		No	Active
649	R144.3	R144.3		No	Active
650	R151.8	R151.8	OP672	No	Strain had a phenotype, 50% sterile)
651	Y74C9A.4	rcor-1	RW12222	Yes
652	T01E8.2	ref-1	RW12224	Yes
653	C47C12.3	ref-2	OP520	Yes
654	F11A10.2	repo-1	OP688	Yes
655	B0414.2	rnt-1	OP462	Yes
656	row-1	row-1	OP510(strain ChIP'd), OP547, OP548, OP549	Yes
657	F53H10.2	saeg-1	OP580	No	Failed ChIP-seq multiple times, discontinued
658	T23G5.6	saeg-2	RW12230	Yes
659	Y47D3B.7	sbp-1	OP140	No	Insufficient expression
660	C55C2.1	scrt-1	OP802, OP803	Yes
661	F52E10.1	sdc-1	RW12225	No	Cytoplasmic
662	F12E12.5	sdz-12	OP670	Yes
663	ZK892.7	sdz-38	OP542, OP543, OP564	Yes
664	F19B10.9	sea-1	OP129	Yes
665	K10G6.3	sea-2	OP193(strain ChIP'd), OP194, OP586(strain ChIP'd)	Yes
666	C32E12.5	sem-2	OP701	Yes
667	F15C11.1	sem-4	RW10466 (aka OP57)	Yes
668	F44A6.2	sex-1	OP369	No	Strain had a phenotype
669	T19E7.2	skn-1	OP341, OP342	Yes
670	W02H5.7	sknr-1		No	Active
671	Y59A8B.13	slr-2	RW12343	No	Insufficient Expression
672	ZK370.2	sma-2	OP653, OP661	No	Cytoplasmic
673	R13F6.9	sma-3	CS152	Yes
674	R12B2.1	sma-4	CS692	Yes
675	T05A10.1	sma-9	OP130, LW1254	Yes
676	snai-1	snai-1	OP698	Yes
677	F32H2.1	snpc-4	OP179, YL457, YL551	Yes
678	ZK686.4	snu-23	OP528	Yes
679	M04G12.4	somi-1	OP752	Yes
680	K08A8.2	sox-2	RW12244	Yes
681	F40E10.2	sox-3	RW12330	No	Failed ChIP-seq multiple times, discontinued
682	C12D12.5	sox-4	OP517	Yes
683	C25G4.4	spe-44		No	Active
684	C07A12.5	spr-3	OP703	Yes
685	C09H6.1	spr-4	OP805	No	Cytoplasmic
686	F45H11.1	sptf-1	OP707, OP722, OP196	Yes
687	T22C8.5	sptf-2	OP769	Yes
688	Y40B1A.4	sptf-3	RW12349	Yes	ChIP-seq complete after data freeze
689	C29G2.5	srt-58		No	Low DCPM
690	Y51H4A.17	sta-1	RW12332	Yes	ChIP-seq completed after October 2022
691	F58E6.1	sta-2	RW12242	No	Cytoplasmic
692	C01B7.1	sup-37	OP611, OP612, OP632	Yes
693	Y113G7B.23	swsn-1	RW12187(strain ChIP'd), RW11188, RW12189	No	Failed ChIP-seq multiple times, discontinued
694	C08B11.3	swsn-7	OP512	Yes
695	ZK867.1	syd-9	OP434, OP488	Yes
696	T06G6.5	T06G6.5		No	Low DCPM
697	T07D10.3	T07D10.3		No	Active
698	T07F8.4	T07F8.4	OP478	Yes
699	T08G5.7	T08G5.7		No	Low DCPM
700	T18D3.7	T18D3.7	OP238, OP555	No	Low DCPM
701	T20F7.1	T20F7.1	OP754	Yes
702	T20H4.2	T20H4.2	OP526	No	Low DCPM
703	T22C8.3	T22C8.3	OP647	No	Low DCPM
704	T22C8.4	T22C8.4	OP785	Yes
705	T23F11.4	T23F11.4	OP709	Yes
706	T26A8.4	T26A8.4	OP692	Yes
707	T27A8.2	T27A8.2	OP786, OP787	No	Cytoplasmic
708	F31E8.3	tab-1	OP789	Yes
709	C27A12.3	tag-146		No	Active
710	F37D6.6	tag-68	OP447	No	Cytoplasmic
711	C33A11.4	tag-97	OP719	Yes
712	F40H6.4	tbx-11	OP368	Yes
713	F21H11.3	tbx-2	OP159	Yes
714	Y59E9AR.3	tbx-30		No	Active
715	C36C9.2	tbx-31		No	Low DCPM
716	ZK380.1	tbx-32		No	Low DCPM
717	Y66A7A.8	tbx-33		No	Active
718	Y47D3A.10	tbx-34		No	Active
719	ZK177.10	tbx-35		No	Active
720	ZK829.5	tbx-36	OP715	No	Cytoplasmic
721	Y47D3A.12	tbx-37	RW12282	Yes
722	C24H11.3	tbx-38	MLC893	No	Strain had a phenotype
723	Y73F8A.16	tbx-39		No	Active
724	Y73F8A.17	tbx-40		No	Active
725	T26C11.1	tbx-41		No	Low DCPM
726	Y59E9AR.5	tbx-42		No	Active
727	Y46E12A.4	tbx-43		No	Active
728	ZK328.8	tbx-7	OP311	Yes
729	T07C4.2	tbx-8	RW10470 (aka OP59)	Yes
730	T07C4.6	tbx-9	OP617, OP635, OP636	Yes
731	T23G4.1	tlp-1	OP321	Yes
732	Y47D3A.6	tra-1	DZ840 (ChIP'd), RW12348	Yes
733	F53B3.1	tra-4	OP640	Yes
734	Y113G7A.6	ttx-1	PHX1679	Yes	ChIP-seq completed after October 2022
735	C40H5.5	ttx-3	RW10483, RW10484 (aka OP68), RW10485	Yes
736	D1081.2	unc-120	OP659, OP71	Yes
737	C47G2.2	unc-130	OP76, OP77, AGK154 (or AGK541)	Yes
738	Y16B4A.1	unc-3	OP557, OP577, OP578, RW12259	Yes
739	B0564.10	unc-30	OP395	Yes
740	F56A12.1	unc-39	OP186	Yes
741	F26C11.2	unc-4	PHX1658	Yes	ChIP-seq completed after October 2022
742	F58E6.10	unc-42	OP162, OP173	Yes
743	F55D12.4	unc-55	DCC4035	Yes
744	T28F12.2	unc-62	OP600, OP601, OP602	Yes
745	C30A5.7	unc-86	OP476	Yes
746	R07B1.1	vab-15	OP730	Yes
747	F14F3.1	vab-3		No	Active
748	M142.4	vab-7	RW12267	Yes
749	W02D7.6	W02D7.6		No	Active
750	W03F9.2	W03F9.2	OP215	Yes
751	W04D2.4	W04D2.4	OP804	No	Cytoplasmic
752	R74.3	xbp-1	OP506	Yes
753	Y105C5A.15	Y105C5A.15	OP764, OP773 (strain ChIP'd)	Yes
754	Y111B2A.10	Y111B2A.10		No	Active
755	Y116A8C.19	Y116A8C.19	OP532	Yes
756	Y17G7B.22	Y17G7B.22		No	Active
757	Y22D7AL.16	Y22D7AL.16	OP615	Yes
758	Y37E11B.1	Y37E11B.1	RW12351	No	Cytoplasmic
759	Y37F4.6	Y37F4.6	OP738	No	Cytoplasmic
760	Y44A6D.3	Y44A6D.3		No	Active
761	Y47G6A.7	Y47G6A.7	RW12268, RW12269	No	No expression
762	Y48C3A.12	Y48C3A.12		No	Active
763	Y48G1C.6	Y48G1C.6		No	Active
764	Y48G9A.11	Y48G9A.11	RW12291	Yes
765	Y50E8A.12	Y50E8A.12		No	Active
766	Y53F4B.5	Y53F4B.5		No	Active
767	Y53G8AR.9	Y53G8AR.9	RW12264	Yes
768	Y53H1A.2	Y53H1A.2	RW12261, RW12262	No	Insufficient expression
769	Y55F3AM.14	Y55F3AM.14	OP597, OP608	Yes
770	Y56A3A.18	Y56A3A.18	RW12265, RW12266	Yes
771	Y56A3A.28	Y56A3A.28	RW12344	Yes	ChIP-seq completed after October 2022
772	Y5F2A.4	Y5F2A.4	OP682	Yes
773	Y67H2A.10	Y67H2A.10	RW12295	Yes
774	Y71A12B.8	Y71A12B.8		No	Inappropriate Expression
775	Y73E7A.1	Y73E7A.1		No	Active
776	Y75B8A.6	Y75B8A.6	RW12275, RW12276	Yes
777	Y79H2A.3	Y79H2A.3	RW12273, RW12274	Yes
778	Y82E9BR.17	Y82E9BR.17		No	Active
779	Y95B8A.8	Y95B8A.8	RW12277, RW12278	Yes
780	F28F9.1	zag-1	OP83, OP84	Yes
781	ZC328.2	ZC328.2	OP735	No	Cytoplasmic
782	ZC123.3	zfh-2	RW12167, RW12168, RW12169	Yes
783	F35H8.3	zfp-2	OP534	Yes
784	W05H7.4	zfp-3	RW12271	Yes
785	T07G12.11	zim-3	OP581	Yes
786	Y75B8A.35	zip-1		No	Active
787	T27F2.4	zip-10	OP634	No	Low DCPM
788	W08E12.1	zip-11	OP761	Yes
789	Y75B8A.29	zip-12		No	Active
790	K02F3.4	zip-2	OP432	Yes
791	W07G1.3	zip-3		No	Active
792	Y44E3B.1	zip-4	OP590	Yes
793	C34D1.5	zip-5	OP544	Yes
794	R07H5.10	zip-6		No	Low DCPM
795	Y51H4A.4	zip-7	RW12339	Yes	ChIP-seq completed after October 2022
796	F23F12.9	zip-8	OP326, OP327, OP328, OP333	Yes
797	F17C11.17	zip-9		No	Active
798	ZK1037.13	ZK1037.13		No	Low DCPM
799	ZK1067.2	ZK1067.2		No	Active
800	ZK177.11	ZK177.11		No	Active
801	ZK177.3	ZK177.3		No	Low DCPM
802	ZK185.1	ZK185.1	OP474	Yes
803	ZK337.2	ZK337.2	RW12326	Yes
804	ZK546.5	ZK546.5	OP231, OP473	Yes
805	ZK652.6	ZK652.6		No	Active
806	ZK673.4	ZK673.4		No	Active
807	ZK686.5	ZK686.5	RW12285	No	Cytoplasmic
808	znf-207	znf-207	XTL1186	Yes
809	Y48G8AL.10	znf-236
810	F54F2.5	ztf-1	OP207	Yes
811	F52F12.6	ztf-11	OP511, OP236	Yes
812	F52E4.8	ztf-13		No	Active
813	M163.2	ztf-14	OP782, OP783, OP784	No	Insufficient expression
814	R06C7.9	ztf-15	OP431, OP451	No	Insufficient expression
815	R08E3.4	ztf-16	OP494, OP558	Yes
816	T09A5.12	ztf-17		No	Active
817	T24C4.7	ztf-18	OP496	Yes
818	F13G3.1	ztf-2	OP796	No	Only 10% of animals have expression
819	Y39B6A.46	ztf-20		No	Active
820	Y48C3A.4	ztf-22	OP676	Yes
821	Y54E10BR.8	ztf-23	RW12279, RW12280	Yes
822	Y6G8.3	ztf-25	RW12287	Yes
823	F55H12.6	ztf-26	OP565	Yes
824	T09F3.1	ztf-27	OP705	No	Failed ChIP-seq multiple times
825	F36F12.8	ztf-28	RW12281	Yes
826	Y66D12A.12	ztf-29	RW12283, RW12284	Yes
827	C53D5.4	ztf-3	OP614, OP619	Yes
828	C06E1.8	ztf-30	OP382	No	Strain had a phenotype (30% sterile) and insufficient expression
829	T10B11.3	ztf-4	OP322	Yes
830	W06H12.1	ztf-6	RW12301	Yes
831	F46B6.7	ztf-7	OP307, OP308, OP309, OP332	Yes
832	ZC395.8	ztf-8		No	Active
833	ZK287.6	ztf-9	OP762	No	Failed IDR, Poor expression

## Sheet: S7.Worm TFs with ChIP-seq
	Gene_name	Wormbase_ID	Sequence_name	Strain	Antibody	Stage	Domains_from_Fuxmann Bass et al. 2016/Uniprot	Method	Peaks	Publication Date
1	aha-1	WBGene00000095	C25A1.11	OP124	Anthony Hyman non-commercial eGFP modENCODE antibody 1	L4larva	bHLH	Bombardment	404	2018
2	aha-1	WBGene00000095	C25A1.11	OP124	Anthony Hyman non-commercial eGFP modENCODE antibody 1	L1larva	bHLH	Bombardment	408	2018
3	ahr-1	WBGene00000096	C41G7.5	OP562	Kevin White goat-anti-GFP-UC	lateembryonic	bHLH	Bombardment	334	2018
4	alr-1	WBGene00044330	R08B4.2	OP362	Kevin White goat-anti-GFP-UC	L1larva	HD - PRD	Bombardment	1374	2024
5	aptf-2	WBGene00013383	Y62E10A.17	RW12304	Kevin White goat-anti-GFP-UC	youngadult	AP-2	CRISPR	892	2024
6	aptf-3	WBGene00009203	F28C6.2	OP765	Kevin White goat-anti-GFP-UC	youngadult	AP-2	Bombardment	785	2024
7	arid-1	WBGene00044689	Y108G3AL.7	RW12194	Kevin White goat-anti-GFP-UC	L4larva	ARID	CRISPR	2330	2024
8	atf-7	WBGene00000223	C07G2.2	OP638	Kevin White goat-anti-GFP-UC	youngadult	bZIP	Bombardment	1537	2018
9	athp-1	WBGene00008081	C44B9.4	OP685	Kevin White goat-anti-GFP-UC	youngadult	AT Hook x2	Bombardment	1046	2018
10	attf-3	WBGene00018794	F54C4.3	RW12296	Kevin White goat-anti-GFP-UC	youngadult	ZF - C2H2 - 3 fingers, AT Hook	CRISPR	1737	2024
11	attf-4	WBGene00015477	C05D10.1	OP219	Anthony Hyman non-commercial eGFP modENCODE antibody 1	L4larva	AT Hook	Bombardment	72	2024
12	attf-5	WBGene00020214	T04G9.1	OP724	Kevin White goat-anti-GFP-UC	youngadult	AT Hook	Bombardment	2605	2024
13	attf-6	WBGene00012474	Y18D10A.1	RW12231	Kevin White goat-anti-GFP-UC	youngadult	AT Hook x2	CRISPR	2269	2024
14	B0019.2	WBGene00007094	B0019.2	RW12288	Kevin White goat-anti-GFP-UC	youngadult	AT Hook, Homeobox-like	CRISPR	900	2024
15	B0261.1	WBGene00015091	B0261.1	OP662	Kevin White goat-anti-GFP-UC	youngadult	MYB	Bombardment	2525	2018
16	B0310.2	WBGene00015138	B0310.2	OP642	Kevin White goat-anti-GFP-UC	earlyembryonic	ZF - C2H2 - 2 fingers	Bombardment	418	2018
17	bcl-11	WBGene00017430	F13H6.1	OP471	Kevin White goat-anti-GFP-UC	lateembryonic	ZF - C2H2 - 3 fingers	Bombardment	966	2024
18	bcl-11	WBGene00017430	F13H6.1	OP471	Kevin White goat-anti-GFP-UC	L2larva	ZF - C2H2 - 3 fingers	Bombardment	4195	2024
19	bed-1	WBGene00012674	Y39B6A.12	RW12201	Kevin White goat-anti-GFP-UC	youngadult	ZF - BED	CRISPR	589	2024
20	bed-2	WBGene00012943	Y47D3B.9	RW12335	Kevin White goat-anti-GFP-UC	youngadult	ZF - BED x2	CRISPR	626	2024
21	bed-3	WBGene00009133	F25H8.6	OP651	Kevin White goat-anti-GFP-UC	mixedstage_embryonic	ZF - BED	Bombardment	609	2024
22	blmp-1	WBGene00003847	F25D7.3	OP109	Anthony Hyman non-commercial eGFP modENCODE antibody 1	L1larva	ZF - C2H2 - 4 fingers	Bombardment	8330	2018
23	blmp-1	WBGene00003847	F25D7.3	OP109	Anthony Hyman non-commercial eGFP modENCODE antibody 1	mixedstage_embryonic	ZF - C2H2 - 4 fingers	Bombardment	780	2018
24	C04F5.9	WBGene00015451	C04F5.9	OP525	Kevin White goat-anti-GFP-UC	L1larva	ZF - C2H2 - 3 fingers	Bombardment	1085	2018
25	C16A3.4	WBGene00015809	C16A3.4	OP345	Anthony Hyman non-commercial eGFP modENCODE antibody 1	L1larva	ZF - C2H2 - 3 fingers	Bombardment	2416	2018
26	C34B4.2	WBGene00007907	C34B4.2	OP552	Kevin White goat-anti-GFP-UC	L1larva	WH - Fork Head	Bombardment	190	2018
27	C38D4.7	WBGene00008007	C38D4.7	OP708	Kevin White goat-anti-GFP-UC	lateembryonic	ZF - C2H2 - 1 finger	Bombardment	511	2024
28	ccch-3	WBGene00012277	W05B10.2	OP628	Kevin White goat-anti-GFP-UC	youngadult	ZF - C3H1 - 1 finger	Bombardment	195	2024
29	cebp-1	WBGene00016997	D1005.3	RW12290	Kevin White goat-anti-GFP-UC	youngadult	bZIP	CRISPR	1969	2018
30	cebp-1	WBGene00016997	D1005.3	OP563	Kevin White goat-anti-GFP-UC	youngadult	bZIP	Bombardment	6085	2018
31	cebp-2	WBGene00016754	C48E7.11	OP331	Kevin White goat-anti-GFP-UC	youngadult	bZIP	Bombardment	1419	2024
32	ceh-100	WBGene00012584	Y38E10A.6	RW12233	Kevin White goat-anti-GFP-UC	youngadult	HD - POU - 10 domains	CRISPR	1911	2024
33	ceh-13	WBGene00000437	R13A5.5	OP756	Kevin White goat-anti-GFP-UC	earlyembryonic	HD - HOX	Bombardment	406	2024
34	ceh-14	WBGene00000438	F46C8.5	OP315	Kevin White goat-anti-GFP-UC	lateembryonic	HD - LIM	Bombardment	1364	2018
35	ceh-16	WBGene00000439	C13G5.1	OP82	Anthony Hyman non-commercial eGFP modENCODE antibody 1	L2larva	HD - HOX	Bombardment	1123	2018
36	ceh-16	WBGene00000439	C13G5.1	OP82	Anthony Hyman non-commercial eGFP modENCODE antibody 1	L3larva	HD - HOX	Bombardment	310	2018
37	ceh-18	WBGene00000441	ZC64.3	OP533	Kevin White goat-anti-GFP-UC	lateembryonic	HD - POU	Bombardment	2881	2018
38	ceh-19	WBGene00000442	F20D12.6	OP739	Kevin White goat-anti-GFP-UC	lateembryonic	HD - HOX	Bombardment	815	2024
39	ceh-2	WBGene00000429	C27A12.5	OP323	Kevin White goat-anti-GFP-UC	lateembryonic	HD - NK	Bombardment	1156	2018
40	ceh-20	WBGene00000443	F31E3.1	RW12211	Kevin White goat-anti-GFP-UC	L4larva	HD - TALE	CRISPR	2632	2024
41	ceh-22	WBGene00000445	F29F11.5	OP389	Anthony Hyman non-commercial eGFP modENCODE antibody 1	lateembryonic	HD - NK	Bombardment	202	2018
42	ceh-24	WBGene00000447	F55B12.1	OP673	Kevin White goat-anti-GFP-UC	lateembryonic	HD - NK	Bombardment	223	2018
43	ceh-27	WBGene00000449	F46F3.1	OP139	Kevin White goat-anti-GFP-UC	youngadult	HD - NK	Bombardment	2178	2024
44	ceh-30	WBGene00000451	C33D12.7	OP120	Anthony Hyman non-commercial eGFP modENCODE antibody 1	lateembryonic	HD - NK	Bombardment	393	2018
45	ceh-31	WBGene00000452	C33D12.1	OP370	Kevin White goat-anti-GFP-UC	lateembryonic	HD - NK	Bombardment	2954	2018
46	ceh-32	WBGene00000453	W05E10.3	OP516	Kevin White goat-anti-GFP-UC	L4larva	HD - SIX	Bombardment	408	2018
47	ceh-34	WBGene00000455	C10G8.6	OP524	Kevin White goat-anti-GFP-UC	lateembryonic	HD - SIX	Bombardment	1920	2018
48	ceh-36	WBGene00000457	C37E2.4	OP620	Kevin White goat-anti-GFP-UC	earlyembryonic	HD - PRD	Bombardment	1765	2018
49	ceh-37	WBGene00000458	C37E2.5	OH16345	Kevin White goat-anti-GFP-UC	L1larva	HD - PRD	CRISPR	1026	2024
50	ceh-38	WBGene00000459	F22D3.1	OP241	Anthony Hyman non-commercial eGFP modENCODE antibody 1	L3larva	HD - NK	Bombardment	3142	2018
51	ceh-38	WBGene00000459	F22D3.1	OP241	Anthony Hyman non-commercial eGFP modENCODE antibody 1	L4larva	HD - NK	Bombardment	1466	2018
52	ceh-39	WBGene00000460	T26C11.7	OP169	Anthony Hyman non-commercial eGFP modENCODE antibody 1	mixedstage_embryonic	HD - CUT	Bombardment	2047	2018
53	ceh-40	WBGene00000461	F17A2.5	OP232	Kevin White goat-anti-GFP-UC	youngadult	HD - TALE	Bombardment	867	2024
54	ceh-43	WBGene00000463	C28A5.4	OP699	Kevin White goat-anti-GFP-UC	mixedstage_embryonic	HD - NK	Bombardment	666	2024
55	ceh-44	WBGene00000464	Y54F10AM.4	RW12327	Kevin White goat-anti-GFP-UC	L4larva	HD - CUT	CRISPR	1027	2024
56	ceh-45	WBGene00022837	ZK993.1	RW12292	Kevin White goat-anti-GFP-UC	lateembryonic	HD - PRD	CRISPR	548	2024
57	ceh-48	WBGene00015934	C17H12.9	OP631	Kevin White goat-anti-GFP-UC	lateembryonic	HD - CUT	Bombardment	1956	2018
58	ceh-5	WBGene00000430	C16C2.1	PHX1592	Kevin White goat-anti-GFP-UC	lateembryonic	HD - NK	CRISPR	2162	2024
59	ceh-51	WBGene00013583	Y80D3A.3	PHX1551	Kevin White goat-anti-GFP-UC	midembryonic	HD - HOX	CRISPR	1158	2024
60	ceh-58	WBGene00007417	C07E3.6	OP808	Kevin White goat-anti-GFP-UC	youngadult	HD - HOX	Bombardment	732	2024
61	ceh-6	WBGene00000431	K02B12.1	OP748	Kevin White goat-anti-GFP-UC	lateembryonic	HD - POU	Bombardment	691	2024
62	ceh-62	WBGene00011069	R06F6.6	OP416	Anthony Hyman non-commercial eGFP modENCODE antibody 1	L4larva	HD - HOX	Bombardment	21	2024
63	ceh-63	WBGene00045215	C02F12.10	OP742	Kevin White goat-anti-GFP-UC	L1larva	HD	Bombardment	1643	2024
64	ceh-79	WBGene00007749	C26E1.3	OP553	Kevin White goat-anti-GFP-UC	youngadult	HD	Bombardment	232	2018
65	ceh-8	WBGene00000433	ZK265.4	OP760	Kevin White goat-anti-GFP-UC	L1larva	HD - PRD - 2 domains	Bombardment	1298	2024
66	ceh-82	WBGene00018433	F45C12.2	OP212	Anthony Hyman non-commercial eGFP modENCODE antibody 1	L3larva	HD	Bombardment	573	2024
67	ceh-82	WBGene00018433	F45C12.2	OP212	Anthony Hyman non-commercial eGFP modENCODE antibody 1	L2larva	HD	Bombardment	292	2024
68	ceh-82	WBGene00018433	F45C12.2	OP212	Anthony Hyman non-commercial eGFP modENCODE antibody 1	L1larva	HD	Bombardment	1813	2024
69	ceh-82	WBGene00018433	F45C12.2	OP212	Anthony Hyman non-commercial eGFP modENCODE antibody 1	L1larva	HD	Bombardment	3515	2024
70	ceh-82	WBGene00018433	F45C12.2	OP212	Anthony Hyman non-commercial eGFP modENCODE antibody 1	L1larva	HD	Bombardment	1889	2024
71	ceh-83	WBGene00018446	F45C12.15	OP727	Kevin White goat-anti-GFP-UC	mixedstage_embryonic	HD - POU - 2 domains	Bombardment	9267	2024
72	ceh-88	WBGene00008195	C49C3.5	OP593	Kevin White goat-anti-GFP-UC	L1larva	HD - TALE	Bombardment	1349	2024
73	ceh-9	WBGene00000434	Y65B4BR.9	OP202	Kevin White goat-anti-GFP-UC	lateembryonic	HD - NK	Bombardment	164	2018
74	ceh-9	WBGene00000434	Y65B4BR.9	OP202	Anthony Hyman non-commercial eGFP modENCODE antibody 1	L3larva	HD - NK	Bombardment	14	2018
75	ceh-90	WBGene00010995	R03E1.4	OP210	Kevin White goat-anti-GFP-UC	L1larva	HD	Bombardment	919	2018
76	ceh-91	WBGene00013425	Y66A7A.5	RW12305	Kevin White goat-anti-GFP-UC	youngadult	HD - 2 domains	CRISPR	1716	2024
77	ces-1	WBGene00000468	F43G9.11	OP174	Anthony Hyman non-commercial eGFP modENCODE antibody 1	L4larva	ZF - C2H2 - 4 fingers	Bombardment	625	2018
78	ces-1	WBGene00000468	F43G9.11	OP174	Anthony Hyman non-commercial eGFP modENCODE antibody 1	mixedstage_embryonic	ZF - C2H2 - 4 fingers	Bombardment	7530	2018
79	ces-1	WBGene00000468	F43G9.11	OP174	Anthony Hyman non-commercial eGFP modENCODE antibody 1	L1larva	ZF - C2H2 - 4 fingers	Bombardment	135	2018
80	che-1	WBGene00000483	C55B7.12	OP677	Kevin White goat-anti-GFP-UC	lateembryonic	ZF - C2H2 - 4 fingers	Bombardment	677	2018
81	cnd-1	WBGene00000561	C34E10.7	OP349	Kevin White goat-anti-GFP-UC	mixedstage_embryonic	bHLH	Bombardment	1535	2024
82	cog-1	WBGene00000584	R03C1.3	OP541	Kevin White goat-anti-GFP-UC	midembryonic	HD - NK	Bombardment	1312	2018
83	crh-2	WBGene00016162	C27D6.4	OP425	Anthony Hyman non-commercial eGFP modENCODE antibody 1	L2larva	bZIP	Bombardment	5300	2024
84	ctbp-1	WBGene00006424	F49E10.5	RW12203	Kevin White goat-anti-GFP-UC	L4larva	ZF - THAP	CRISPR	2927	2024
85	D1046.2	WBGene00008363	D1046.2	OP397	Kevin White goat-anti-GFP-UC	L4larva	ZF - C2H2 - 1 finger	Bombardment	1641	2024
86	D2030.7	WBGene00008417	D2030.7	RW12302	Kevin White goat-anti-GFP-UC	youngadult	ZF - C2H2 - 1 finger	CRISPR	3082	2024
87	daf-12	WBGene00000908	F11A1.3	OP222	Anthony Hyman non-commercial eGFP modENCODE antibody 1	L4larva	ZF - NHR	Bombardment	29	2018
88	daf-12	WBGene00000908	F11A1.3	OP222	Anthony Hyman non-commercial eGFP modENCODE antibody 1	L3larva	ZF - NHR	Bombardment	95	2018
89	daf-16	WBGene00000912	R13H8.1	ZM7247	Kevin White goat-anti-GFP-UC	L4larva	WH - Fork Head, AT Hook	Bombardment	2693	2018
90	daf-16	WBGene00000912	R13H8.1	XE1464	Anthony Hyman non-commercial eGFP modENCODE antibody 1	L4larva	WH - Fork Head, AT Hook	Bombardment	5758	2018
91	daf-16	WBGene00000912	R13H8.1	ZM8745	Kevin White goat-anti-GFP-UC	L4larva	WH - Fork Head, AT Hook	Bombardment	1054	2018
92	daf-19	WBGene00000914	F33H1.1	OP794	Kevin White goat-anti-GFP-UC	L4larva	WH - RFX	Bombardment	996	2024
93	daf-8	WBGene00000904	R05D11.1	OP790	Kevin White goat-anti-GFP-UC	L4larva	MH1	Bombardment	282	2024
94	die-1	WBGene00000995	C18D1.1	RW10316	Kevin White goat-anti-GFP-UC	youngadult	ZF - C2H2 - 3 fingers	Bombardment	1149	2018
95	dmd-4	WBGene00007776	C27C12.6	OP418	Anthony Hyman non-commercial eGFP modENCODE antibody 1	L2larva	ZF - DM	Bombardment	212	2018
96	dmd-4	WBGene00007776	C27C12.6	OP418	Kevin White goat-anti-GFP-UC	lateembryonic	ZF - DM	Bombardment	3562	2018
97	dmd-6	WBGene00007058	F13G11.1	RJP5356	Kevin White goat-anti-GFP-UC	L4larva	ZF - DM	CRISPR	7338	2024
98	dmd-8	WBGene00020708	T22H9.4	OP775	Kevin White goat-anti-GFP-UC	L4larva	ZF - DM - 2 domains	Bombardment	1556	2024
99	dmd-9	WBGene00022060	Y67D8A.3	RJP5357	Kevin White goat-anti-GFP-UC	L4larva	ZF - DM	CRISPR	1379	2024
100	dox-1	WBGene00013128	Y52B11A.9	RW12180	Kevin White goat-anti-GFP-UC	youngadult	ZF - C2H2 - 1 finger	CRISPR	4441	2024
101	dpff-1	WBGene00016200	C28H8.9	OP579	Kevin White goat-anti-GFP-UC	youngadult	ZF - C2H2 - 1 finger	Bombardment	222	2018
102	dpl-1	WBGene00001061	T23G7.1	YL425	Anthony Hyman non-commercial eGFP modENCODE antibody 1	L1larva	WH - TDP	Bombardment	4390	2018
103	dpl-1	WBGene00001061	T23G7.1	YL448	Anthony Hyman non-commercial eGFP modENCODE antibody 1	L1larva	WH - TDP	Bombardment	3540	2018
104	dpl-1	WBGene00001061	T23G7.1	YL390	Anthony Hyman non-commercial eGFP modENCODE antibody 1	youngadult	WH - TDP	Bombardment	1427	2018
105	dpl-1	WBGene00001061	T23G7.1	YL507	Anthony Hyman non-commercial eGFP modENCODE antibody 1	youngadult	WH - TDP	Bombardment	3552	2018
106	dpl-1	WBGene00001061	T23G7.1	OP105	Anthony Hyman non-commercial eGFP modENCODE antibody 1	L1larva	WH - TDP	Bombardment	2315	2018
107	dpl-1	WBGene00001061	T23G7.1	OP105	Anthony Hyman non-commercial eGFP modENCODE antibody 1	L4larva	WH - TDP	Bombardment	3586	2018
108	drap-1	WBGene00009584	F40F9.7	OP700	Kevin White goat-anti-GFP-UC	mixedstage_embryonic	CBF	Bombardment	1863	2024
109	dsc-1	WBGene00001096	C18B12.3	OP522	Kevin White goat-anti-GFP-UC	L1larva	HD - PRD	Bombardment	4433	2018
110	duxl-1	WBGene00022554	ZC204.2	OP470	Kevin White goat-anti-GFP-UC	L4larva	HD - HOX - 2 domains	Bombardment	1382	2018
111	dve-1	WBGene00022861	ZK1193.5	OP398	Anthony Hyman non-commercial eGFP modENCODE antibody 1	L4larva	HD - 2 domains	Bombardment	6997	2018
112	dve-1	WBGene00022861	ZK1193.5	OP398	Anthony Hyman non-commercial eGFP modENCODE antibody 1	lateembryonic	HD - 2 domains	Bombardment	1541	2018
113	efl-1	WBGene00001161	Y102A5C.18	YL479	Anthony Hyman non-commercial eGFP modENCODE antibody 1	youngadult	WH - TDP	Bombardment	2308	2018
114	efl-1	WBGene00001161	Y102A5C.18	N2	EFL-1 antibody Novus Biologicals Cat. number 44960002	L1larva	WH - TDP		5464	2018
115	efl-1	WBGene00001161	Y102A5C.18	YL478	Anthony Hyman non-commercial eGFP modENCODE antibody 1	youngadult	WH - TDP	Bombardment	3234	2018
116	efl-1	WBGene00001161	Y102A5C.18	YL445	Anthony Hyman non-commercial eGFP modENCODE antibody 1	youngadult	WH - TDP	Bombardment	2374	2018
117	efl-1	WBGene00001161	Y102A5C.18	MT10430	EFL-1 antibody Novus Biologicals Cat. number 44960002	L1larva	WH - TDP		4338	2018
118	efl-1	WBGene00001161	Y102A5C.18	YL418	Anthony Hyman non-commercial eGFP modENCODE antibody 1	L1larva	WH - TDP	Bombardment	1921	2018
119	efl-1	WBGene00001161	Y102A5C.18	YL424	Anthony Hyman non-commercial eGFP modENCODE antibody 1	L1larva	WH - TDP	Bombardment	3746	2018
120	efl-3	WBGene00009899	F49E12.6	OP344	Kevin White goat-anti-GFP-UC	L1larva	WH - TDP - 2 domains	Bombardment	206	2024
121	egl-13	WBGene00001182	T22B7.1	GOU883	Kevin White goat-anti-GFP-UC	L1larva	HMG box	Bombardment	1325	2018
122	egl-18	WBGene00001186	F55A8.1	RW12252	Kevin White goat-anti-GFP-UC	youngadult	ZF - GATA	CRISPR	699	2024
123	egl-27	WBGene00001194	C04A2.3	OP177	Anthony Hyman non-commercial eGFP modENCODE antibody 1	L1larva	ZF - GATA, MYB	Bombardment	505	2018
124	egl-27	WBGene00001194	C04A2.3	OP177	Anthony Hyman non-commercial eGFP modENCODE antibody 1	L4larva	ZF - GATA, MYB	Bombardment	78	2018
125	egl-27	WBGene00001194	C04A2.3	OP177	Anthony Hyman non-commercial eGFP modENCODE antibody 1	L1larva	ZF - GATA, MYB	Bombardment	385	2018
126	egl-27	WBGene00001194	C04A2.3	OP177	Anthony Hyman non-commercial eGFP modENCODE antibody 1	L3larva	ZF - GATA, MYB	Bombardment	458	2018
127	egl-27	WBGene00001194	C04A2.3	OP177	Anthony Hyman non-commercial eGFP modENCODE antibody 1	L2larva	ZF - GATA, MYB	Bombardment	2002	2018
128	egl-43	WBGene00001207	R53.3	RW12181	Kevin White goat-anti-GFP-UC	L4larva	ZF - C2H2 - 4 fingers	CRISPR	3146	2024
129	egl-44	WBGene00001208	F28B12.2	RW12173	Kevin White goat-anti-GFP-UC	youngadult	TEA/ATTS	CRISPR	1553	2024
130	egl-5	WBGene00001174	C08C3.1	OP54	Anthony Hyman non-commercial eGFP modENCODE antibody 1	L3larva	HD - HOX	Bombardment	1815	2018
131	egrh-3	WBGene00044651	Y94H6A.11	RW12196	Kevin White goat-anti-GFP-UC	youngadult	ZF - C2H2 - 3 fingers	CRISPR	3278	2024
132	ekl-4	WBGene00013676	Y105E8A.17	RW12207	Kevin White goat-anti-GFP-UC	youngadult	DAMP1 SANT/Myb-like	CRISPR	2847	2024
133	elt-1	WBGene00001249	W09C2.1	OP354	Anthony Hyman non-commercial eGFP modENCODE antibody 1	L3larva	ZF - GATA - 2 domains	Bombardment	1700	2018
134	elt-1	WBGene00001249	W09C2.1	OP354	Anthony Hyman non-commercial eGFP modENCODE antibody 1	mixedstage_embryonic	ZF - GATA - 2 domains	Bombardment	1252	2018
135	elt-1	WBGene00001249	W09C2.1	OP354	Anthony Hyman non-commercial eGFP modENCODE antibody 1	L2larva	ZF - GATA - 2 domains	Bombardment	217	2018
136	elt-2	WBGene00001250	C33D3.1	OP56	Kevin White goat-anti-GFP-UC	lateembryonic	ZF - GATA	Bombardment	3136	2018
137	elt-2	WBGene00001250	C33D3.1	OP56	Kevin White goat-anti-GFP-UC	L1larva	ZF - GATA	Bombardment	2553	2018
138	elt-2	WBGene00001250	C33D3.1	OP56	Kevin White goat-anti-GFP-UC	L3larva	ZF - GATA	Bombardment	9525	2018
139	elt-3	WBGene00001251	K02B9.4	OP75	Anthony Hyman non-commercial eGFP modENCODE antibody 1	L1larva	ZF - GATA	Bombardment	726	2018
140	elt-3	WBGene00001251	K02B9.4	OP75	Anthony Hyman non-commercial eGFP modENCODE antibody 1	L3larva	ZF - GATA	Bombardment	905	2018
141	elt-3	WBGene00001251	K02B9.4	OP75	Anthony Hyman non-commercial eGFP modENCODE antibody 1	L1larva	ZF - GATA	Bombardment	3087	2018
142	elt-3	WBGene00001251	K02B9.4	OP75	Anthony Hyman non-commercial eGFP modENCODE antibody 1	L1larva	ZF - GATA	Bombardment	1192	2018
143	elt-3	WBGene00001251	K02B9.4	OP75	Anthony Hyman non-commercial eGFP modENCODE antibody 1	L3larva	ZF - GATA	Bombardment	127	2018
144	elt-3	WBGene00001251	K02B9.4	OP75	Anthony Hyman non-commercial eGFP modENCODE antibody 1	L1larva	ZF - GATA	Bombardment	811	2018
145	elt-3	WBGene00001251	K02B9.4	OP75	Anthony Hyman non-commercial eGFP modENCODE antibody 1	mixedstage_embryonic	ZF - GATA	Bombardment	453	2018
146	elt-3	WBGene00001251	K02B9.4	OP75	Anthony Hyman non-commercial eGFP modENCODE antibody 1	L1larva	ZF - GATA	Bombardment	258	2018
147	elt-3	WBGene00001251	K02B9.4	OP75	Anthony Hyman non-commercial eGFP modENCODE antibody 1	L2larva	ZF - GATA	Bombardment	10	2018
148	elt-3	WBGene00001251	K02B9.4	OP75	Anthony Hyman non-commercial eGFP modENCODE antibody 1	L3larva	ZF - GATA	Bombardment	380	2018
149	elt-3	WBGene00001251	K02B9.4	OP75	Anthony Hyman non-commercial eGFP modENCODE antibody 1	L1larva	ZF - GATA	Bombardment	2538	2018
150	elt-4	WBGene00001252	C39B10.6	OP111	Kevin White goat-anti-GFP-UC	lateembryonic	ZF - GATA	Bombardment	288	2018
151	eor-1	WBGene00001324	R11E3.6	OP81	Anthony Hyman non-commercial eGFP modENCODE antibody 1	L3larva	ZF - C2H2 - 9 fingers	Bombardment	433	2018
152	ets-4	WBGene00017687	F22A3.1	OP509	Kevin White goat-anti-GFP-UC	lateembryonic	WH - ETS	Bombardment	1078	2018
153	ets-4	WBGene00017687	F22A3.1	RAF1713	Kevin White goat-anti-GFP-UC	youngadult	WH - ETS	site-specific recombination	749	2018
154	ets-5	WBGene00016600	C42D8.4	OP809	Kevin White goat-anti-GFP-UC	L1larva	WH - ETS	Bombardment	250	2024
155	ets-7	WBGene00017601	F19F10.5	OP487	Kevin White goat-anti-GFP-UC	earlyembryonic	WH - ETS	Bombardment	613	2018
156	eyg-1	WBGene00013147	Y53C12C.1	OP443	Kevin White goat-anti-GFP-UC	lateembryonic	HD - PRD, Paired Domain - CPAX	Bombardment	503	2024
157	F10B5.3	WBGene00008640	F10B5.3	OP529	Kevin White goat-anti-GFP-UC	L4larva	ZF - C2H2 - 4 fingers	Bombardment	830	2018
158	F10E7.11	WBGene00017352	F10E7.11	OP658	Kevin White goat-anti-GFP-UC	youngadult	MYB	Bombardment	268	2018
159	F22D6.2	WBGene00009050	F22D6.2	OP399	Kevin White goat-anti-GFP-UC	youngadult	ZF - A20	Bombardment	863	2018
160	F23B12.7	WBGene00009084	F23B12.7	OP429	Anthony Hyman non-commercial eGFP modENCODE antibody 1	youngadult	CBF	Bombardment	1945	2018
161	F26F4.8	WBGene00005011	F26F4.8	OP776	Kevin White goat-anti-GFP-UC	L4larva	ZF - C2H2 - 6 fingers	Bombardment	978	2024
162	F33H1.4	WBGene00009365	F33H1.4	RW12303	Kevin White goat-anti-GFP-UC	youngadult	ZF - C2H2 - 1 finger, AT Hook x3	CRISPR	3250	2024
163	F37B4.10	WBGene00018140	F37B4.10	OP374	Kevin White goat-anti-GFP-UC	youngadult	ZF - C2H2 - 1 finger	Bombardment	947	2024
164	F39B2.1	WBGene00009553	F39B2.1	RW12232	Kevin White goat-anti-GFP-UC	youngadult	ZF - C2H2 - 9 fingers	CRISPR	630	2024
165	F44E2.7	WBGene00018420	F44E2.7	OP381	Kevin White goat-anti-GFP-UC	L4larva	ZF - C2H2 - 2 fingers	Bombardment	896	2024
166	F52B5.7	WBGene00009923	F52B5.7	OP606	Kevin White goat-anti-GFP-UC	youngadult	ZF - C2H2 - 1 finger	Bombardment	1240	2018
167	F57C9.4	WBGene00019011	F57C9.4	OP550	Kevin White goat-anti-GFP-UC	youngadult	ZF - C2H2 - 3 fingers	Bombardment	162	2018
168	fax-1	WBGene00001400	F56E3.4	OP164	Kevin White goat-anti-GFP-UC	lateembryonic	ZF - NHR	Bombardment	802	2018
169	fkh-10	WBGene00001442	C25A1.2	OP337	Anthony Hyman non-commercial eGFP modENCODE antibody 1	L4larva	WH - Fork Head	Bombardment	1251	2018
170	fkh-10	WBGene00001442	C25A1.2	OP337	Anthony Hyman non-commercial eGFP modENCODE antibody 1	lateembryonic	WH - Fork Head	Bombardment	156	2018
171	fkh-10	WBGene00001442	C25A1.2	OP337	Anthony Hyman non-commercial eGFP modENCODE antibody 1	L1larva	WH - Fork Head	Bombardment	1761	2018
172	fkh-10	WBGene00001442	C25A1.2	OP337	Anthony Hyman non-commercial eGFP modENCODE antibody 1	L3larva	WH - Fork Head	Bombardment	1593	2018
173	fkh-2	WBGene00001434	T14G12.4	OP185	Anthony Hyman non-commercial eGFP modENCODE antibody 1	L3larva	WH - Fork Head	Bombardment	136	2018
174	fkh-3	WBGene00001435	C29F7.4	OP594	Kevin White goat-anti-GFP-UC	youngadult	WH - Fork Head	Bombardment	272	2018
175	fkh-4	WBGene00001436	C29F7.5	OP100	Kevin White goat-anti-GFP-UC	L1larva	WH - Fork Head	Bombardment	647	2018
176	fkh-6	WBGene00001438	B0286.5	OP78	Kevin White goat-anti-GFP-UC	lateembryonic	WH - Fork Head	Bombardment	588	2018
177	fkh-7	WBGene00001439	F26D12.1	PS9154	Kevin White goat-anti-GFP-UC	L1larva	ZF - C2H2 - 1 finger, WH - Fork Head	Bombardment	866	2024
178	fkh-8	WBGene00001440	F40H3.4	OP652	Kevin White goat-anti-GFP-UC	L1larva	WH - Fork Head	Bombardment	3159	2018
179	flh-1	WBGene00012435	Y11D7A.12	OP702	Kevin White goat-anti-GFP-UC	mixedstage_embryonic	ZF - FLYWCH	Bombardment	335	2024
180	fos-1	WBGene00001345	F29G9.4	OP304	Anthony Hyman non-commercial eGFP modENCODE antibody 1	L3larva	bZIP	Bombardment	274	2018
181	fos-1	WBGene00001345	F29G9.4	OP304	Anthony Hyman non-commercial eGFP modENCODE antibody 1	L1larva	bZIP	Bombardment	1622	2018
182	fos-1	WBGene00001345	F29G9.4	OP304	Anthony Hyman non-commercial eGFP modENCODE antibody 1	L4larva	bZIP	Bombardment	79	2018
183	fos-1	WBGene00001345	F29G9.4	OP304	Anthony Hyman non-commercial eGFP modENCODE antibody 1	L2larva	bZIP	Bombardment	6975	2018
184	gei-17	WBGene00001574	W10D5.3	OP572	Kevin White goat-anti-GFP-UC	youngadult	ZF - MIZ	Bombardment	1074	2024
185	gei-8	WBGene00001565	C14B9.6	OP589	Kevin White goat-anti-GFP-UC	L4larva	MYB - 2 domains	Bombardment	1049	2024
186	gmeb-1	WBGene00015285	C01B12.2	OP343	Anthony Hyman non-commercial eGFP modENCODE antibody 1	L2larva	SAND	Bombardment	4293	2024
187	gmeb-2	WBGene00010010	F53H4.5	OP622	Kevin White goat-anti-GFP-UC	lateembryonic	SAND	Bombardment	566	2018
188	grh-1	WBGene00001707	Y48G8AR.1	RW12208	Kevin White goat-anti-GFP-UC	L1larva	CP2	CRISPR	2470	2024
189	ham-2	WBGene00001821	C07A12.1	OP639	Kevin White goat-anti-GFP-UC	mixedstage_embryonic	ZF - C2H2 - 2 fingers	Bombardment	1868	2024
190	hif-1	WBGene00001851	F38A6.3	OR3350	Kevin White goat-anti-GFP-UC	L4larva	bHLH	Bombardment	524	2018
191	hif-1	WBGene00001851	F38A6.3	OR3349	Kevin White goat-anti-GFP-UC	L4larva	bHLH	Bombardment	3623	2018
192	hlh-1	WBGene00001948	B0304.1	OP64	Anthony Hyman non-commercial eGFP modENCODE antibody 1	mixedstage_embryonic	bHLH	Bombardment	2164	2018
193	hlh-11	WBGene00001955	F58A4.7	OP396	Kevin White goat-anti-GFP-UC	L4larva	bHLH	Bombardment	7938	2024
194	hlh-12	WBGene00001956	C28C12.8	OP538	Kevin White goat-anti-GFP-UC	youngadult	bHLH	Bombardment	82	2018
195	hlh-13	WBGene00001957	F48D6.3	OP744	Kevin White goat-anti-GFP-UC	lateembryonic	bHLH	Bombardment	349	2024
196	hlh-15	WBGene00001959	C43H6.8	OP566	Kevin White goat-anti-GFP-UC	lateembryonic	bHLH	Bombardment	287	2018
197	hlh-17	WBGene00001961	F38C2.2	OP643	Kevin White goat-anti-GFP-UC	L1larva	bHLH	Bombardment	233	2024
198	hlh-26	WBGene00001965	C17C3.8	RW12174	Kevin White goat-anti-GFP-UC	youngadult	bHLH - 2 domains	CRISPR	90	2024
199	hlh-30	WBGene00020930	W02C12.3	OP433	Anthony Hyman non-commercial eGFP modENCODE antibody 1	lateembryonic	bHLH	Bombardment	2027	2018
200	hlh-30	WBGene00020930	W02C12.3	OP433	Anthony Hyman non-commercial eGFP modENCODE antibody 1	L4larva	bHLH	Bombardment	6817	2018
201	hlh-4	WBGene00001951	T05G5.2	OP523	Kevin White goat-anti-GFP-UC	L1larva	bHLH	Bombardment	454	2018
202	hlh-6	WBGene00001952	T15H9.3	RW10702	Kevin White goat-anti-GFP-UC	lateembryonic	bHLH	Bombardment	1153	2018
203	hlh-8	WBGene00001953	C02B8.4	OP63	Kevin White goat-anti-GFP-UC	lateembryonic	bHLH	Bombardment	1166	2018
204	hmbx-1	WBGene00018786	F54A5.1	OP656	Kevin White goat-anti-GFP-UC	earlyembryonic	HD - HNF	Bombardment	359	2018
205	hmg-1.1	WBGene00001971	Y48B6A.14	RW12311	Kevin White goat-anti-GFP-UC	L4larva	HMG box	CRISPR	4414	2024
206	hmg-11	WBGene00001976	T05A7.4	TH184	Kevin White goat-anti-GFP-UC	L3larva	AT Hook x3	Bombardment	4891	2018
207	hmg-20	WBGene00012209	W02D9.3	RW12240	Kevin White goat-anti-GFP-UC	youngadult	HMG box	CRISPR	1016	2024
208	hmg-4	WBGene00001974	T20B12.8	OP660	Kevin White goat-anti-GFP-UC	earlyembryonic	HMG box	Bombardment	3209	2024
209	hnd-1	WBGene00001981	C44C10.8	OP573	Kevin White goat-anti-GFP-UC	earlyembryonic	bHLH	Bombardment	727	2018
210	hsf-1	WBGene00002004	Y53C10A.12	RW12254	Kevin White goat-anti-GFP-UC	youngadult	WH - HSF	CRISPR	2935	2024
211	irx-1	WBGene00007984	C36F7.1	OP536	Kevin White goat-anti-GFP-UC	L1larva	HD - TALE	Bombardment	1585	2018
212	jun-1	WBGene00012005	T24H10.7	OP234	Anthony Hyman non-commercial eGFP modENCODE antibody 1	L3larva	bZIP	Bombardment	1910	2018
213	jun-1	WBGene00012005	T24H10.7	OP234	Anthony Hyman non-commercial eGFP modENCODE antibody 1	L1larva	bZIP	Bombardment	1866	2018
214	jun-1	WBGene00012005	T24H10.7	OP234	Anthony Hyman non-commercial eGFP modENCODE antibody 1	L4larva	bZIP	Bombardment	702	2018
215	K09A11.1	WBGene00010704	K09A11.1	OP372	Anthony Hyman non-commercial eGFP modENCODE antibody 1	lateembryonic	ZF - BED	Bombardment	600	2018
216	K11D2.4	WBGene00010770	K11D2.4	RW12320	Kevin White goat-anti-GFP-UC	youngadult	ZF - C2H2 - 3 fingers	CRISPR	1984	2024
217	K12H6.12	WBGene00019691	K12H6.12	OP214	Kevin White goat-anti-GFP-UC	youngadult	ZF - C2H2 - 1 finger	Bombardment	1673	2024
218	klf-2	WBGene00009998	F53F8.1	RW12310	Kevin White goat-anti-GFP-UC	midembryonic	ZF - C2H2 - 3 fingers	CRISPR	1032	2024
219	lag-1	WBGene00002245	K08B4.1	RW12314	Kevin White goat-anti-GFP-UC	youngadult	IPT/TIG	CRISPR	322	2024
220	let-526	WBGene00002717	C01G8.9	RW12306	Kevin White goat-anti-GFP-UC	youngadult	ARID/BRIGHT	CRISPR	1200	2024
221	let-607	WBGene00002783	F57B10.1	YL529	Kevin White goat-anti-GFP-UC	youngadult	bZIP	Bombardment	1781	2018
222	let-607	WBGene00002783	F57B10.1	YL651	Kevin White goat-anti-GFP-UC	youngadult	bZIP	Bombardment	867	2018
223	lim-6	WBGene00002988	K03E6.1	OP388	Kevin White goat-anti-GFP-UC	lateembryonic	HD - LIM	Bombardment	558	2018
224	lim-7	WBGene00002989	C04F1.3	OP779	Kevin White goat-anti-GFP-UC	L4larva	HD - LIM	Bombardment	1804	2024
225	lin-1	WBGene00002990	C37F5.1	RW12212	Kevin White goat-anti-GFP-UC	L4larva	WH - ETS	CRISPR	2329	2024
226	lin-11	WBGene00003000	ZC247.3	OP62	Kevin White goat-anti-GFP-UC	lateembryonic	HD - LIM	Bombardment	458	2018
227	lin-11	WBGene00003000	ZC247.3	OP62	Anthony Hyman non-commercial eGFP modENCODE antibody 1	L2larva	HD - LIM	Bombardment	2032	2018
228	lin-13	WBGene00003002	C03B8.4	OP49	Anthony Hyman non-commercial eGFP modENCODE antibody 1	L1larva	ZF - C2H2 - 15 fingers	Bombardment	1625	2018
229	lin-13	WBGene00003002	C03B8.4	OP49	Anthony Hyman non-commercial eGFP modENCODE antibody 1	L2larva	ZF - C2H2 - 15 fingers	Bombardment	4035	2018
230	lin-13	WBGene00003002	C03B8.4	OP49	Anthony Hyman non-commercial eGFP modENCODE antibody 1	L4larva	ZF - C2H2 - 15 fingers	Bombardment	1807	2018
231	lin-13	WBGene00003002	C03B8.4	OP51	Anthony Hyman non-commercial eGFP modENCODE antibody 1	mixedstage_embryonic	ZF - C2H2 - 15 fingers	Bombardment	1477	2018
232	lin-14	WBGene00003003	T25C12.1	OP768	Kevin White goat-anti-GFP-UC	L1larva	Unknown	Bombardment	9348	2024
233	lin-15B	WBGene00023497	ZK662.4	OP184	Anthony Hyman non-commercial eGFP modENCODE antibody 1	L4larva	AT Hook x2, ZF - THAP	Bombardment	181	2024
234	lin-15B	WBGene00023497	ZK662.4	OP184	Anthony Hyman non-commercial eGFP modENCODE antibody 1	L3larva	AT Hook x2, ZF - THAP	Bombardment	3244	2024
235	lin-15B	WBGene00023497	ZK662.4	OP184	Anthony Hyman non-commercial eGFP modENCODE antibody 1	L1larva	AT Hook x2, ZF - THAP	Bombardment	1619	2024
236	lin-26	WBGene00003012	F18A1.2	RW12178	Kevin White goat-anti-GFP-UC	youngadult	ZF - C2H2 - 1 finger	CRISPR	3201	2024
237	lin-29	WBGene00003015	W03C9.4	RW12227	Kevin White goat-anti-GFP-UC	L4larva	ZF - C2H2 - 5 fingers	CRISPR	906	2024
238	lin-32	WBGene00003018	T14F9.5	OP740	Kevin White goat-anti-GFP-UC	mixedstage_embryonic	bHLH	Bombardment	798	2024
239	lin-38	WBGene00013006	Y48E1B.7	RW12236	Kevin White goat-anti-GFP-UC	L4larva	ZF - C2H2 - 1 finger	CRISPR	5577	2024
240	lin-39	WBGene00003024	C07H6.7	OP18	Anthony Hyman non-commercial eGFP modENCODE antibody 1	L1larva	HD - HOX	Bombardment	1432	2018
241	lin-39	WBGene00003024	C07H6.7	OP18	Anthony Hyman non-commercial eGFP modENCODE antibody 1	L4larva	HD - HOX	Bombardment	105	2018
242	lin-39	WBGene00003024	C07H6.7	OP18	Anthony Hyman non-commercial eGFP modENCODE antibody 1	L2larva	HD - HOX	Bombardment	302	2018
243	lin-39	WBGene00003024	C07H6.7	OP18	Anthony Hyman non-commercial eGFP modENCODE antibody 1	L3larva	HD - HOX	Bombardment	3829	2018
244	lin-40	WBGene00003025	T27C4.4	OP485	Kevin White goat-anti-GFP-UC	youngadult	ZnF GATA, MYB	Bombardment	5458	2018
245	lin-54	WBGene00003037	JC8.6	OP743	Kevin White goat-anti-GFP-UC	youngadult	TESMIN x2	Bombardment	3606	2024
246	lir-1	WBGene00003044	F18A1.3	RW12318	Kevin White goat-anti-GFP-UC	youngadult	ZnF - 1 finger	CRISPR	1209	2024
247	lir-3	WBGene00003046	F37H8.1	OP312	Kevin White goat-anti-GFP-UC	L1larva	ZF - C2H2 - 1 finger	Bombardment	2307	2018
248	lir-3	WBGene00003046	F37H8.1	OP312	Kevin White goat-anti-GFP-UC	L4larva	ZF - C2H2 - 1 finger	Bombardment	522	2018
249	lsl-1	WBGene00009937	F52F12.4	OP720	Kevin White goat-anti-GFP-UC	youngadult	ZF - C2H2 - 5 fingers	Bombardment	3400	2024
250	lsy-12	WBGene00045419	R07B5.9	OP568	Kevin White goat-anti-GFP-UC	L3larva	AT Hook	Bombardment	1718	2018
251	lsy-2	WBGene00003087	F49H12.1	OP240	Anthony Hyman non-commercial eGFP modENCODE antibody 1	L4larva	ZF - C2H2 - 5 fingers	Bombardment	1070	2018
252	lsy-2	WBGene00003087	F49H12.1	OP367	Anthony Hyman non-commercial eGFP modENCODE antibody 1	mixedstage_embryonic	ZF - C2H2 - 5 fingers	Bombardment	3070	2018
253	lsy-2	WBGene00003087	F49H12.1	OP367	Anthony Hyman non-commercial eGFP modENCODE antibody 1	L1larva	ZF - C2H2 - 5 fingers	Bombardment	4966	2018
254	lsy-2	WBGene00003087	F49H12.1	OP367	Anthony Hyman non-commercial eGFP modENCODE antibody 1	L2larva	ZF - C2H2 - 5 fingers	Bombardment	6716	2018
255	lsy-2	WBGene00003087	F49H12.1	OP240	Anthony Hyman non-commercial eGFP modENCODE antibody 1	L2larva	ZF - C2H2 - 5 fingers	Bombardment	1920	2018
256	lsy-2	WBGene00003087	F49H12.1	OP367	Anthony Hyman non-commercial eGFP modENCODE antibody 1	L1larva	ZF - C2H2 - 5 fingers	Bombardment	7796	2018
257	lsy-2	WBGene00003087	F49H12.1	OP367	Anthony Hyman non-commercial eGFP modENCODE antibody 1	L4larva	ZF - C2H2 - 5 fingers	Bombardment	6131	2018
258	lsy-27	WBGene00009834	F47H4.1	OP401	Anthony Hyman non-commercial eGFP modENCODE antibody 1	youngadult	ZF - C2H2 - 2 fingers	Bombardment	243	2018
259	M03D4.4	WBGene00019751	M03D4.4	OP696	Kevin White goat-anti-GFP-UC	mixedstage_embryonic	ZF - C2H2 - 6 fingers	Bombardment	1438	2018
260	mab-5	WBGene00003102	C08C3.3	OP27	Anthony Hyman non-commercial eGFP modENCODE antibody 1	mixedstage_embryonic	HD - HOX	Bombardment	436	2018
261	mab-5	WBGene00003102	C08C3.3	OP27	Anthony Hyman non-commercial eGFP modENCODE antibody 1	L2larva	HD - HOX	Bombardment	2014	2018
262	mab-9	WBGene00003106	T27A1.6	RW12257	Kevin White goat-anti-GFP-UC	L1larva	T-box	CRISPR	1492	2024
263	madf-10	WBGene00013717	Y106G6H.4	OP508	Kevin White goat-anti-GFP-UC	youngadult	MADF	Bombardment	2442	2018
264	madf-2	WBGene00009461	F36D1.1	OP587	Kevin White goat-anti-GFP-UC	lateembryonic	MADF	Bombardment	756	2018
265	madf-3	WBGene00019218	H20J04.3	RW12241	Kevin White goat-anti-GFP-UC	youngadult	MADF - 2 domains	CRISPR	2741	2024
266	madf-5	WBGene00007242	C01G12.1	OP436	Kevin White goat-anti-GFP-UC	L4larva	MADF	Bombardment	844	2024
267	madf-5	WBGene00007242	C01G12.1	RW12308	Kevin White goat-anti-GFP-UC	L4larva	MADF	CRISPR	1145	2024
268	madf-6	WBGene00016930	C54G6.1	RW12237	Kevin White goat-anti-GFP-UC	youngadult	MADF	CRISPR	5060	2024
269	madf-8	WBGene00008118	C46F11.3	RW12322	Kevin White goat-anti-GFP-UC	youngadult	MADF	CRISPR	1977	2024
270	madf-9	WBGene00022608	ZC416.1	RW12324	Kevin White goat-anti-GFP-UC	L4larva	MADF	CRISPR	1637	2024
271	mbf-1	WBGene00003148	H21P03.1	OP427	Anthony Hyman non-commercial eGFP modENCODE antibody 1	L2larva	HTH	Bombardment	96	2018
272	mcd-1	WBGene00013096	Y51H1A.6	RW12215	Kevin White goat-anti-GFP-UC	youngadult	ZF - C2H2 - 1 finger	CRISPR	4460	2024
273	mdl-1	WBGene00003163	R03E9.1	OP355	Anthony Hyman non-commercial eGFP modENCODE antibody 1	L4larva	bHLH	Bombardment	1055	2018
274	mdl-1	WBGene00003163	R03E9.1	OP355	Anthony Hyman non-commercial eGFP modENCODE antibody 1	L3larva	bHLH	Bombardment	951	2018
275	mdl-1	WBGene00003163	R03E9.1	OP355	Anthony Hyman non-commercial eGFP modENCODE antibody 1	L2larva	bHLH	Bombardment	1927	2018
276	mdl-1	WBGene00003163	R03E9.1	OP355	Anthony Hyman non-commercial eGFP modENCODE antibody 1	L4larva	bHLH	Bombardment	3425	2018
277	mdl-1	WBGene00003163	R03E9.1	OP355	Anthony Hyman non-commercial eGFP modENCODE antibody 1	L1larva	bHLH	Bombardment	199	2018
278	mdl-1	WBGene00003163	R03E9.1	OP355	Anthony Hyman non-commercial eGFP modENCODE antibody 1	L2larva	bHLH	Bombardment	893	2018
279	mdl-1	WBGene00003163	R03E9.1	OP106	Anthony Hyman non-commercial eGFP modENCODE antibody 1	L1larva	bHLH	Bombardment	4182	2018
280	mec-3	WBGene00003167	F01D4.6	OP55	Kevin White goat-anti-GFP-UC	lateembryonic	HD - LIM	Bombardment	843	2018
281	mec-3	WBGene00003167	F01D4.6	OP55	Kevin White goat-anti-GFP-UC	lateembryonic	HD - LIM	Bombardment	302	2018
282	med-1	WBGene00003180	T24D3.1	OP391	Anthony Hyman non-commercial eGFP modENCODE antibody 1	midembryonic	ZF - GATA	Bombardment	597	2018
283	mef-2	WBGene00003182	W10D5.1	OP301	Anthony Hyman non-commercial eGFP modENCODE antibody 1	L1larva	MADS box	Bombardment	641	2018
284	mel-28	WBGene00003210	C38D4.3	OP646	Kevin White goat-anti-GFP-UC	youngadult	AT Hook x2	Bombardment	153	2018
285	mep-1	WBGene00003218	M04B2.1	OP102	Anthony Hyman non-commercial eGFP modENCODE antibody 1	L1larva	ZF - C2H2 - 5 fingers	Bombardment	4531	2018
286	mep-1	WBGene00003218	M04B2.1	OP102	Anthony Hyman non-commercial eGFP modENCODE antibody 1	L4larva	ZF - C2H2 - 5 fingers	Bombardment	6510	2018
287	mep-1	WBGene00003218	M04B2.1	OP70	Anthony Hyman non-commercial eGFP modENCODE antibody 1	mixedstage_embryonic	ZF - C2H2 - 5 fingers	Bombardment	2559	2018
288	mls-2	WBGene00003377	C39E6.4	OP645	Kevin White goat-anti-GFP-UC	mixedstage_embryonic	HD - NK	Bombardment	1885	2018
289	mml-1	WBGene00003378	T20B12.6	OP198	Anthony Hyman non-commercial eGFP modENCODE antibody 1	L3larva	bHLH	Bombardment	138	2018
290	mxl-1	WBGene00003509	T19B10.11	OP537	Kevin White goat-anti-GFP-UC	youngadult	bHLH	Bombardment	343	2018
291	mxl-2	WBGene00003510	F40G9.11	RW12316	Kevin White goat-anti-GFP-UC	L4larva	bHLH	CRISPR	1009	2024
292	mxl-3	WBGene00003511	F46G10.6	OP745	Kevin White goat-anti-GFP-UC	L4larva	bHLH	Bombardment	3801	2024
293	nfya-1	WBGene00011614	T08D10.1	OP404	Anthony Hyman non-commercial eGFP modENCODE antibody 1	youngadult	CBF	Bombardment	311	2018
294	nfya-1	WBGene00011614	T08D10.1	OP404	Anthony Hyman non-commercial eGFP modENCODE antibody 1	L3larva	CBF	Bombardment	8013	2018
295	nfya-1	WBGene00011614	T08D10.1	OP404	Anthony Hyman non-commercial eGFP modENCODE antibody 1	lateembryonic	CBF	Bombardment	3210	2018
296	nfya-2	WBGene00043056	Y53H1A.5	RW12238	Kevin White goat-anti-GFP-UC	youngadult	CBF	CRISPR	435	2024
297	nfyb-1	WBGene00021132	W10D9.4	RW12190	Kevin White goat-anti-GFP-UC	youngadult	CBF	CRISPR	4061	2024
298	nhr-10	WBGene00003609	B0280.8	OP239	Anthony Hyman non-commercial eGFP modENCODE antibody 1	L2larva	ZF - NHR	Bombardment	263	2018
299	nhr-10	WBGene00003609	B0280.8	OP239	Anthony Hyman non-commercial eGFP modENCODE antibody 1	L4larva	ZF - NHR	Bombardment	416	2018
300	nhr-102	WBGene00003692	T06C12.6	OP463	Kevin White goat-anti-GFP-UC	L4larva	ZF - NHR	Bombardment	3607	2018
301	nhr-11	WBGene00003610	ZC410.1	OP305	Anthony Hyman non-commercial eGFP modENCODE antibody 1	L4larva	ZF - NHR	Bombardment	1871	2018
302	nhr-11	WBGene00003610	ZC410.1	OP305	Anthony Hyman non-commercial eGFP modENCODE antibody 1	L3larva	ZF - NHR	Bombardment	1790	2018
303	nhr-11	WBGene00003610	ZC410.1	OP305	Anthony Hyman non-commercial eGFP modENCODE antibody 1	lateembryonic	ZF - NHR	Bombardment	32	2018
304	nhr-11	WBGene00003610	ZC410.1	OP305	Anthony Hyman non-commercial eGFP modENCODE antibody 1	L1larva	ZF - NHR	Bombardment	764	2018
305	nhr-11	WBGene00003610	ZC410.1	OP305	Anthony Hyman non-commercial eGFP modENCODE antibody 1	L2larva	ZF - NHR	Bombardment	85	2018
306	nhr-111	WBGene00003701	F44G3.9	OP569	Kevin White goat-anti-GFP-UC	L4larva	ZF - NHR	Bombardment	258	2024
307	nhr-12	WBGene00003611	R04B5.4	OP318	Anthony Hyman non-commercial eGFP modENCODE antibody 1	L1larva	ZF - NHR	Bombardment	78	2018
308	nhr-12	WBGene00003611	R04B5.4	OP318	Anthony Hyman non-commercial eGFP modENCODE antibody 1	mixedstage_embryonic	ZF - NHR	Bombardment	125	2018
309	nhr-12	WBGene00003611	R04B5.4	OP318	Anthony Hyman non-commercial eGFP modENCODE antibody 1	L2larva	ZF - NHR	Bombardment	174	2018
310	nhr-120	WBGene00003710	C25B8.6	OP415	Kevin White goat-anti-GFP-UC	youngadult	ZF - NHR	Bombardment	610	2024
311	nhr-129	WBGene00003719	C50B6.14	OP339	Anthony Hyman non-commercial eGFP modENCODE antibody 1	L2larva	ZF - NHR	Bombardment	5696	2018
312	nhr-179	WBGene00017512	F16B4.11	OP465	Kevin White goat-anti-GFP-UC	youngadult	ZF - NHR	Bombardment	152	2018
313	nhr-19	WBGene00003618	E02H1.7	OP791	Kevin White goat-anti-GFP-UC	L1larva	ZF - NHR	Bombardment	4560	2024
314	nhr-2	WBGene00003601	C32F10.6	OP99	Anthony Hyman non-commercial eGFP modENCODE antibody 1	mixedstage_embryonic	ZF - NHR	Bombardment	1860	2018
315	nhr-20	WBGene00003619	F43C1.4	OP515	Kevin White goat-anti-GFP-UC	L1larva	ZF - NHR	Bombardment	5234	2018
316	nhr-21	WBGene00003620	F21D12.1	OP361	Anthony Hyman non-commercial eGFP modENCODE antibody 1	L2larva	ZF - NHR	Bombardment	3168	2018
317	nhr-23	WBGene00003622	C01H6.5	OP43	Anthony Hyman non-commercial eGFP modENCODE antibody 1	L3larva	ZF - NHR	Bombardment	4765	2018
318	nhr-23	WBGene00003622	C01H6.5	OP43	Anthony Hyman non-commercial eGFP modENCODE antibody 1	L2larva	ZF - NHR	Bombardment	46	2018
319	nhr-232	WBGene00012494	Y22F5A.1	OP489	Kevin White goat-anti-GFP-UC	lateembryonic	ZF - NHR	Bombardment	615	2018
320	nhr-237	WBGene00021610	Y46H3D.6	OP228	Anthony Hyman non-commercial eGFP modENCODE antibody 1	L3larva	ZF - NHR	Bombardment	58	2018
321	nhr-237	WBGene00021610	Y46H3D.6	OP228	Anthony Hyman non-commercial eGFP modENCODE antibody 1	mixedstage_embryonic	ZF - NHR	Bombardment	1320	2018
322	nhr-237	WBGene00021610	Y46H3D.6	OP228	Anthony Hyman non-commercial eGFP modENCODE antibody 1	L1larva	ZF - NHR	Bombardment	634	2018
323	nhr-237	WBGene00021610	Y46H3D.6	OP228	Anthony Hyman non-commercial eGFP modENCODE antibody 1	L4larva	ZF - NHR	Bombardment	175	2018
324	nhr-237	WBGene00021610	Y46H3D.6	OP228	Anthony Hyman non-commercial eGFP modENCODE antibody 1	L2larva	ZF - NHR	Bombardment	176	2018
325	nhr-25	WBGene00003623	F11C1.6	OP33	Anthony Hyman non-commercial eGFP modENCODE antibody 1	L4larva	ZF - NHR	Bombardment	1401	2018
326	nhr-25	WBGene00003623	F11C1.6	OP33	Anthony Hyman non-commercial eGFP modENCODE antibody 1	L2larva	ZF - NHR	Bombardment	5093	2018
327	nhr-25	WBGene00003623	F11C1.6	OP33	Anthony Hyman non-commercial eGFP modENCODE antibody 1	L3larva	ZF - NHR	Bombardment	3951	2018
328	nhr-270	WBGene00020062	R13D11.8	OP208	Kevin White goat-anti-GFP-UC	youngadult	ZF - NHR	Bombardment	240	2024
329	nhr-28	WBGene00003624	C11G6.4	OP317	Anthony Hyman non-commercial eGFP modENCODE antibody 1	L1larva	ZF - NHR	Bombardment	189	2018
330	nhr-28	WBGene00003624	C11G6.4	OP317	Anthony Hyman non-commercial eGFP modENCODE antibody 1	L3larva	ZF - NHR	Bombardment	85	2018
331	nhr-28	WBGene00003624	C11G6.4	OP317	Anthony Hyman non-commercial eGFP modENCODE antibody 1	mixedstage_embryonic	ZF - NHR	Bombardment	351	2018
332	nhr-28	WBGene00003624	C11G6.4	OP317	Anthony Hyman non-commercial eGFP modENCODE antibody 1	L4larva	ZF - NHR	Bombardment	7341	2018
333	nhr-41	WBGene00022423	Y104H12A.1	RW12221	Kevin White goat-anti-GFP-UC	L4larva	ZF - NHR	CRISPR	1136	2024
334	nhr-42	WBGene00003632	C33G8.6	OP351	Kevin White goat-anti-GFP-UC	L4larva	ZF - NHR	Bombardment	1789	2024
335	nhr-43	WBGene00003633	C29E6.5	OP477	Kevin White goat-anti-GFP-UC	L3larva	ZF - NHR	Bombardment	1880	2018
336	nhr-47	WBGene00003637	C24G6.4	OP481	Kevin White goat-anti-GFP-UC	L1larva	ZF - NHR	Bombardment	6044	2018
337	nhr-48	WBGene00003638	ZK662.3	OP518	Kevin White goat-anti-GFP-UC	L4larva	ZF - NHR	Bombardment	2873	2018
338	nhr-6	WBGene00003605	C48D5.1	OP90	Anthony Hyman non-commercial eGFP modENCODE antibody 1	L4larva	ZF - NHR	Bombardment	1674	2018
339	nhr-6	WBGene00003605	C48D5.1	OP90	Anthony Hyman non-commercial eGFP modENCODE antibody 1	L2larva	ZF - NHR	Bombardment	2279	2018
340	nhr-67	WBGene00003657	C08F8.8	OP373	Anthony Hyman non-commercial eGFP modENCODE antibody 1	L3larva	ZF - NHR	Bombardment	91	2018
341	nhr-71	WBGene00003661	K11E4.5	OP480	Kevin White goat-anti-GFP-UC	L1larva	ZF - NHR	Bombardment	8572	2018
342	nhr-76	WBGene00015497	C05G6.1	OP203	Anthony Hyman non-commercial eGFP modENCODE antibody 1	mixedstage_embryonic	ZF - NHR	Bombardment	79	2018
343	nhr-76	WBGene00015497	C05G6.1	OP203	Anthony Hyman non-commercial eGFP modENCODE antibody 1	L3larva	ZF - NHR	Bombardment	213	2018
344	nhr-76	WBGene00015497	C05G6.1	OP203	Anthony Hyman non-commercial eGFP modENCODE antibody 1	L1larva	ZF - NHR	Bombardment	157	2018
345	nhr-76	WBGene00015497	C05G6.1	OP203	Anthony Hyman non-commercial eGFP modENCODE antibody 1	L4larva	ZF - NHR	Bombardment	364	2018
346	nhr-77	WBGene00003667	T15D6.6	OP353	Anthony Hyman non-commercial eGFP modENCODE antibody 1	L2larva	ZF - NHR	Bombardment	311	2018
347	nhr-77	WBGene00003667	T15D6.6	OP353	Anthony Hyman non-commercial eGFP modENCODE antibody 1	L1larva	ZF - NHR	Bombardment	1677	2018
348	nhr-77	WBGene00003667	T15D6.6	OP353	Anthony Hyman non-commercial eGFP modENCODE antibody 1	L4larva	ZF - NHR	Bombardment	3226	2018
349	nhr-77	WBGene00003667	T15D6.6	OP353	Anthony Hyman non-commercial eGFP modENCODE antibody 1	L3larva	ZF - NHR	Bombardment	536	2018
350	nhr-80	WBGene00003670	H10E21.3	OP460	Kevin White goat-anti-GFP-UC	youngadult	ZF - NHR	Bombardment	10085	2018
351	nhr-84	WBGene00003674	T06C12.7	OP357	Anthony Hyman non-commercial eGFP modENCODE antibody 1	L1larva	ZF - NHR	Bombardment	145	2018
352	nhr-85	WBGene00003675	W05B5.3	OP539	Kevin White goat-anti-GFP-UC	L1larva	ZF - NHR	Bombardment	1948	2018
353	nhr-90	WBGene00003680	ZK488.2	OP483	Kevin White goat-anti-GFP-UC	L1larva	ZF - NHR	Bombardment	3013	2018
354	nhr-90	WBGene00003680	ZK488.2	OP484	Kevin White goat-anti-GFP-UC	youngadult	ZF - NHR	Bombardment	2367	2018
355	npax-4	WBGene00007496	C09G9.7	OP493	Kevin White goat-anti-GFP-UC	lateembryonic	Paired Domain - NPAX	Bombardment	303	2018
356	odd-2	WBGene00003846	C34H3.2	OP405	Anthony Hyman non-commercial eGFP modENCODE antibody 1	lateembryonic	ZF - C2H2 - 3 fingers	Bombardment	875	2018
357	pag-3	WBGene00003909	F45B8.4	OP154	Anthony Hyman non-commercial eGFP modENCODE antibody 1	L1larva	ZF - C2H2 - 5 fingers	Bombardment	1269	2018
358	pag-3	WBGene00003909	F45B8.4	OP154	Kevin White goat-anti-GFP-UC	lateembryonic	ZF - C2H2 - 5 fingers	Bombardment	324	2018
359	pat-9	WBGene00003933	T27B1.2	RW12085	Kevin White goat-anti-GFP-UC	lateembryonic	ZF - C2H2 - 3 fingers	CRISPR	635	2024
360	pax-1	WBGene00003937	K07C11.1	OP117	Anthony Hyman non-commercial eGFP modENCODE antibody 1	lateembryonic	Paired Domain - FULL	Bombardment	650	2018
361	pax-3	WBGene00003939	F27E5.2	OP190	Kevin White goat-anti-GFP-UC	L1larva	HD - PRD, Paired Domain - FULL	Bombardment	1009	2024
362	peb-1	WBGene00003968	T14F9.4	OP86	Anthony Hyman non-commercial eGFP modENCODE antibody 1	L2larva	ZF - FLYWCH	Bombardment	138	2018
363	pes-1	WBGene00003976	T28H11.4	RW12239	Kevin White goat-anti-GFP-UC	earlyembryonic	WH - Fork Head	CRISPR	1793	2024
364	pha-2	WBGene00004011	M6.3	OP687	Kevin White goat-anti-GFP-UC	lateembryonic	HD - NK	Bombardment	563	2024
365	pha-4	WBGene00004013	F38A6.1	RW12220	Kevin White goat-anti-GFP-UC	L4larva	WH - Fork Head	CRISPR	2947	2018
366	pha-4	WBGene00004013	F38A6.1	OP37	Anthony Hyman non-commercial eGFP modENCODE antibody 1	youngadult	WH - Fork Head	Bombardment	160	2018
367	pha-4	WBGene00004013	F38A6.1	OP37	Anthony Hyman non-commercial eGFP modENCODE antibody 1	L4larva	WH - Fork Head	Bombardment	1266	2018
368	pha-4	WBGene00004013	F38A6.1	OP37	Anthony Hyman non-commercial eGFP modENCODE antibody 1	mixedstage_embryonic	WH - Fork Head	Bombardment	2060	2018
369	pha-4	WBGene00004013	F38A6.1	OP37	Anthony Hyman non-commercial eGFP modENCODE antibody 1	L3larva	WH - Fork Head	Bombardment	8663	2018
370	php-3	WBGene00004024	Y75B8A.1	RW12213	Kevin White goat-anti-GFP-UC	L4larva	HD - HOX	CRISPR	3559	2024
371	pop-1	WBGene00004077	W10C8.2	JIM531	Kevin White goat-anti-GFP-UC	earlyembryonic	HMG box	Bombardment	975	2018
372	pqm-1	WBGene00004096	F40F8.7	OP201	Anthony Hyman non-commercial eGFP modENCODE antibody 1	L1larva	ZF - C2H2 - 3 fingers	Bombardment	390	2018
373	pqm-1	WBGene00004096	F40F8.7	OP201	Anthony Hyman non-commercial eGFP modENCODE antibody 1	L3larva	ZF - C2H2 - 3 fingers	Bombardment	4370	2018
374	pqm-1	WBGene00004096	F40F8.7	OP201	Kevin White goat-anti-GFP-UC	lateembryonic	ZF - C2H2 - 3 fingers	Bombardment	754	2018
375	pqm-1	WBGene00004096	F40F8.7	OP201	Anthony Hyman non-commercial eGFP modENCODE antibody 1	L4larva	ZF - C2H2 - 3 fingers	Bombardment	3690	2018
376	pros-1	WBGene00000448	K12H4.1	OP500	Anthony Hyman non-commercial eGFP modENCODE antibody 1	lateembryonic	HD - PROX	Bombardment	632	2024
377	R02D3.7	WBGene00019824	R02D3.7	OP218	Anthony Hyman non-commercial eGFP modENCODE antibody 1	L2larva	ZF - C2H2 - 1 finger	Bombardment	522	2018
378	R02D3.7	WBGene00019824	R02D3.7	OP218	Anthony Hyman non-commercial eGFP modENCODE antibody 1	L3larva	ZF - C2H2 - 1 finger	Bombardment	1614	2018
379	R02D3.7	WBGene00019824	R02D3.7	OP218	Anthony Hyman non-commercial eGFP modENCODE antibody 1	L4larva	ZF - C2H2 - 1 finger	Bombardment	351	2018
380	rcor-1	WBGene00022278	Y74C9A.4	RW12222	Kevin White goat-anti-GFP-UC	youngadult	ZF - GATA, MYB (2x)	CRISPR	2403	2024
381	ref-1	WBGene00004334	T01E8.2	RW12224	Kevin White goat-anti-GFP-UC	midembryonic	bHLH - 2 domains	CRISPR	675	2024
382	ref-2	WBGene00004335	C47C12.3	OP520	Kevin White goat-anti-GFP-UC	lateembryonic	ZF - C2H2 - 3 fingers	Bombardment	4541	2018
383	repo-1	WBGene00008683	F11A10.2	OP688	Kevin White goat-anti-GFP-UC	youngadult	ZF - C2H2 - 1 finger	Bombardment	1698	2018
384	rnt-1	WBGene00004393	B0414.2	OP462	Kevin White goat-anti-GFP-UC	lateembryonic	RNT	Bombardment	1790	2018
385	rnt-1	WBGene00004393	B0414.2	OP462	Kevin White goat-anti-GFP-UC	L1larva	RNT	Bombardment	5702	2018
386	row-1	WBGene00009508	F37D6.2	OP510	Kevin White goat-anti-GFP-UC	L4larva	ZF - C2H2 - 5 fingers	Bombardment	1939	2024
387	saeg-2	WBGene00011964	T23G5.6	RW12230	Kevin White goat-anti-GFP-UC	L4larva	AT Hook	CRISPR	1307	2024
388	scrt-1	WBGene00016948	C55C2.1	OP802	Kevin White goat-anti-GFP-UC	earlyembryonic	ZF - C2H2 - 2 fingers	Bombardment	1244	2024
389	sdz-12	WBGene00017406	F12E12.5	OP670	Kevin White goat-anti-GFP-UC	L4larva	ZF - C2H2 - 7 fingers	Bombardment	801	2024
390	sdz-38	WBGene00014131	ZK892.7	OP543	Kevin White goat-anti-GFP-UC	youngadult	ZF - C2H2 - 2 fingers	Bombardment	68	2018
391	sea-1	WBGene00004750	F19B10.9	OP129	Kevin White goat-anti-GFP-UC	earlyembryonic	T-box	Bombardment	1249	2024
392	sea-2	WBGene00004751	K10G6.3	OP586	Kevin White goat-anti-GFP-UC	youngadult	ZF - C2H2 - 1 finger	Bombardment	453	2018
393	sea-2	WBGene00004751	K10G6.3	OP193	Anthony Hyman non-commercial eGFP modENCODE antibody 1	L3larva	ZF - C2H2 - 1 finger	Bombardment	136	2018
394	sem-2	WBGene00004771	C32E12.5	OP701	Kevin White goat-anti-GFP-UC	mixedstage_embryonic	HMG box	Bombardment	650	2024
395	sem-4	WBGene00004773	F15C11.1	OP57	Anthony Hyman non-commercial eGFP modENCODE antibody 1	L2larva	ZF - C2H2 - 7 fingers	Bombardment	2482	2018
396	skn-1	WBGene00004804	T19E7.2	OP178	Anthony Hyman non-commercial eGFP modENCODE antibody 1	L1larva	bZIP	Bombardment	2696	2018
397	skn-1	WBGene00004804	T19E7.2	OP342	Anthony Hyman non-commercial eGFP modENCODE antibody 1	L4larva	bZIP	Bombardment	114	2018
398	skn-1	WBGene00004804	T19E7.2	OP342	Anthony Hyman non-commercial eGFP modENCODE antibody 1	L3larva	bZIP	Bombardment	1061	2018
399	skn-1	WBGene00004804	T19E7.2	OP178	Anthony Hyman non-commercial eGFP modENCODE antibody 1	L2larva	bZIP	Bombardment	374	2018
400	sma-3	WBGene00004857	R13F6.9	CS152	Kevin White goat-anti-GFP-UC	L4larva	MH1	Bombardment	824	2018
401	sma-3	WBGene00004857	R13F6.9	CS152	Kevin White goat-anti-GFP-UC	L2larva	MH1	microinjection	4610	2018
402	sma-4	WBGene00004858	R12B2.1	CS692	Kevin White goat-anti-GFP-UC	L4larva	MH1	CRISPR	1606	2024
403	sma-9	WBGene00004862	T05A10.1	OP130	Anthony Hyman non-commercial eGFP modENCODE antibody 1	L2larva	ZF - C2H2 - 7 fingers	Bombardment	78	2018
404	sma-9	WBGene00004862	T05A10.1	LW1254	Kevin White goat-anti-GFP-UC	L2larva	ZF - C2H2 - 7 fingers	Bombardment	7063	2018
405	snai-1	WBGene00019299	K02D7.2	OP698	Kevin White goat-anti-GFP-UC	lateembryonic	ZF - C2H2 - 4 fingers	Bombardment	349	2024
406	snpc-4	WBGene00001568	F32H2.1	YL487	Anthony Hyman non-commercial eGFP modENCODE antibody 1	youngadult	MYB-5 domains	Bombardment	5317	2018
407	snpc-4	WBGene00001568	F32H2.1	OP179	Anthony Hyman non-commercial eGFP modENCODE antibody 1	youngadult	MYB-5 domains	Bombardment	1217	2018
408	snpc-4	WBGene00001568	F32H2.1	OP179	Anthony Hyman non-commercial eGFP modENCODE antibody 1	L3larva	MYB-5 domains	Bombardment	2713	2018
409	snpc-4	WBGene00001568	F32H2.1	OP179	Anthony Hyman non-commercial eGFP modENCODE antibody 1	L4larva	MYB-5 domains	Bombardment	358	2018
410	snpc-4	WBGene00001568	F32H2.1	YL457	Anthony Hyman non-commercial eGFP modENCODE antibody 1	youngadult	MYB-5 domains	Bombardment	1394	2018
411	snpc-4	WBGene00001568	F32H2.1	OP179	Anthony Hyman non-commercial eGFP modENCODE antibody 1	mixedstage_embryonic	MYB-5 domains	Bombardment	1120	2018
412	snpc-4	WBGene00001568	F32H2.1	YL551	Anthony Hyman non-commercial eGFP modENCODE antibody 1	youngadult	MYB-5 domains	Bombardment	3058	2018
413	snpc-4	WBGene00001568	F32H2.1	OP179	Anthony Hyman non-commercial eGFP modENCODE antibody 1	youngadult	MYB-5 domains	Bombardment	1439	2018
414	snpc-4	WBGene00001568	F32H2.1	OP179	Anthony Hyman non-commercial eGFP modENCODE antibody 1	L2larva	MYB-5 domains	Bombardment	1978	2018
415	snpc-4	WBGene00001568	F32H2.1	OP179	Anthony Hyman non-commercial eGFP modENCODE antibody 1	L1larva	MYB-5 domains	Bombardment	2193	2018
416	snu-23	WBGene00022794	ZK686.4	OP528	Kevin White goat-anti-GFP-UC	L1larva	ZF - C2H2 - 1 finger	Bombardment	8275	2018
417	somi-1	WBGene00010868	M04G12.4	OP752	Kevin White goat-anti-GFP-UC	youngadult	ZF - C2H2 - 1 finger	Bombardment	1022	2024
418	sox-2	WBGene00004949	K08A8.2	RW12244	Kevin White goat-anti-GFP-UC	lateembryonic	HMG box	CRISPR	677	2024
419	sox-4	WBGene00015716	C12D12.5	OP517	Kevin White goat-anti-GFP-UC	lateembryonic	HMG box	Bombardment	943	2018
420	sox-4	WBGene00015716	C12D12.5	OP517	Kevin White goat-anti-GFP-UC	L1larva	HMG box	Bombardment	1220	2018
421	spr-3	WBGene00005008	C07A12.5	OP703	Kevin White goat-anti-GFP-UC	L4larva	ZF - C2H2 - 7 fingers	Bombardment	1135	2024
422	sptf-1	WBGene00009743	F45H11.1	OP707	Kevin White goat-anti-GFP-UC	mixedstage_embryonic	ZF - C2H2 - 1 finger	Bombardment	4308	2018
423	sptf-2	WBGene00011926	T22C8.5	OP769	Kevin White goat-anti-GFP-UC	youngadult	ZF - C2H2 - 3 fingers	Bombardment	242	2024
424	sup-37	WBGene00006342	C01B7.1	OP611	Kevin White goat-anti-GFP-UC	L1larva	ZF - C2H2 - 6 fingers	Bombardment	612	2024
425	swsn-7	WBGene00007433	C08B11.3	OP512	Kevin White goat-anti-GFP-UC	L1larva	ZF - C2H2 - 2 fingers, ARID/BRIGHT	Bombardment	4430	2018
426	syd-9	WBGene00044068	ZK867.1	OP488	Kevin White goat-anti-GFP-UC	lateembryonic	ZF - C2H2 - 4 fingers	Bombardment	835	2018
427	T07F8.4	WBGene00020320	T07F8.4	OP478	Kevin White goat-anti-GFP-UC	youngadult	MYB	Bombardment	581	2018
428	T20F7.1	WBGene00020630	T20F7.1	OP754	Kevin White goat-anti-GFP-UC	L4larva	ZF - C2H2 - 2 fingers	Bombardment	3126	2024
429	T22C8.4	WBGene00011925	T22C8.4	OP785	Kevin White goat-anti-GFP-UC	midembryonic	ZF - C2H2 - 1 finger	Bombardment	2415	2024
430	T23F11.4	WBGene00011956	T23F11.4	OP709	Kevin White goat-anti-GFP-UC	lateembryonic	ZF - C2H2 - 1 finger	Bombardment	545	2024
431	T26A8.4	WBGene00020827	T26A8.4	OP692	Kevin White goat-anti-GFP-UC	L4larva	ZF - C3H1 - 3 fingers	Bombardment	2993	2024
432	tab-1	WBGene00006380	F31E8.3	OP787	Kevin White goat-anti-GFP-UC	midembryonic	HD - NK	Bombardment	1559	2024
433	svh-5	WBGene00006462	C33A11.4	OP719	Kevin White goat-anti-GFP-UC	L4larva	WH - ETS	Bombardment	321	2018
434	tbx-11	WBGene00006547	F40H6.4	OP368	Kevin White goat-anti-GFP-UC	earlyembryonic	T-box	Bombardment	1042	2024
435	tbx-2	WBGene00006543	F21H11.3	OP159	Kevin White goat-anti-GFP-UC	lateembryonic	T-box	Bombardment	2376	2018
436	tbx-2	WBGene00006543	F21H11.3	OP159	Kevin White goat-anti-GFP-UC	L1larva	T-box	Bombardment	5458	2018
437	tbx-2	WBGene00006543	F21H11.3	OP159	Kevin White goat-anti-GFP-UC	L3larva	T-box	Bombardment	2023	2018
438	tbx-37	WBGene00006556	Y47D3A.12	RW12282	Kevin White goat-anti-GFP-UC	earlyembryonic	T-box	CRISPR	1107	2024
439	tbx-7	WBGene00006544	ZK328.8	OP311	Kevin White goat-anti-GFP-UC	lateembryonic	T-box	Bombardment	646	2018
440	tbx-8	WBGene00006545	T07C4.2	RW10470	Kevin White goat-anti-GFP-UC	mixedstage_embryonic	T-box	Bombardment	319	2024
441	tbx-9	WBGene00006546	T07C4.6	OP636	Kevin White goat-anti-GFP-UC	youngadult	T-box	Bombardment	254	2018
442	tlp-1	WBGene00006580	T23G4.1	OP321	Anthony Hyman non-commercial eGFP modENCODE antibody 1	L1larva	ZF - C2H2 - 1 finger	Bombardment	162	2018
443	tra-1	WBGene00006604	Y47D3A.6	DZ840	Kevin White goat-anti-GFP-UC	L4larva	ZF - C2H2 - 5 fingers	CRISPR	3168	2024
444	tra-4	WBGene00018740	F53B3.1	OP640	Kevin White goat-anti-GFP-UC	earlyembryonic	ZF - C2H2 - 6 fingers	Bombardment	242	2018
445	ttx-3	WBGene00006654	C40H5.5	OP68	Kevin White goat-anti-GFP-UC	lateembryonic	HD - LIM	Bombardment	865	2018
446	unc-120	WBGene00006844	D1081.2	OP659	Kevin White goat-anti-GFP-UC	mixedstage_embryonic	MADS box	Bombardment	2822	2018
447	unc-130	WBGene00006853	C47G2.2	OP77	Anthony Hyman non-commercial eGFP modENCODE antibody 1	L1larva	WH - Fork Head	Bombardment	2455	2018
448	unc-130	WBGene00006853	C47G2.2	AGK541	Kevin White goat-anti-GFP-UC	youngadult	WH - Fork Head	Bombardment	984	2018
449	unc-130	WBGene00006853	C47G2.2	AGK541	Kevin White goat-anti-GFP-UC	L4larva	WH - Fork Head	Bombardment	1424	2018
450	unc-3	WBGene00006743	Y16B4A.1	RW12259	Kevin White goat-anti-GFP-UC	lateembryonic	IPT/TIG	CRISPR	631	2018
451	unc-3	WBGene00006743	Y16B4A.1	OP578	Kevin White goat-anti-GFP-UC	lateembryonic	IPT/TIG	Bombardment	547	2018
452	unc-30	WBGene00006766	B0564.10	OP395	Anthony Hyman non-commercial eGFP modENCODE antibody 1	L1larva	HD - PRD	Bombardment	122	2018
453	unc-39	WBGene00006775	F56A12.1	OP186	Anthony Hyman non-commercial eGFP modENCODE antibody 1	L4larva	HD - SIX	Bombardment	32	2018
454	unc-39	WBGene00006775	F56A12.1	OP186	Anthony Hyman non-commercial eGFP modENCODE antibody 1	L3larva	HD - SIX	Bombardment	54	2018
455	unc-39	WBGene00006775	F56A12.1	OP186	Anthony Hyman non-commercial eGFP modENCODE antibody 1	mixedstage_embryonic	HD - SIX	Bombardment	152	2018
456	unc-39	WBGene00006775	F56A12.1	OP186	Anthony Hyman non-commercial eGFP modENCODE antibody 1	L2larva	HD - SIX	Bombardment	142	2018
457	unc-42	WBGene00006778	F58E6.10	OP173	Kevin White goat-anti-GFP-UC	lateembryonic	HD - PRD	Bombardment	3610	2018
458	unc-55	WBGene00006790	F55D12.4	NC1639	Anthony Hyman non-commercial eGFP modENCODE antibody 1	L2larva	ZF - NHR	Bombardment	6271	2018
459	unc-62	WBGene00006796	T28F12.2	OP600	Anthony Hyman non-commercial eGFP modENCODE antibody 1	dauer	HD - TALE	Bombardment	33	2018
460	unc-62	WBGene00006796	T28F12.2	OP600	Anthony Hyman non-commercial eGFP modENCODE antibody 1	L3larva	HD - TALE	Bombardment	534	2018
461	unc-62	WBGene00006796	T28F12.2	OP600	Anthony Hyman non-commercial eGFP modENCODE antibody 1	youngadult	HD - TALE	Bombardment	505	2018
462	unc-62	WBGene00006796	T28F12.2	OP600	Anthony Hyman non-commercial eGFP modENCODE antibody 1	L1larva	HD - TALE	Bombardment	39	2018
463	unc-62	WBGene00006796	T28F12.2	OP600	Anthony Hyman non-commercial eGFP modENCODE antibody 1	L4larva	HD - TALE	Bombardment	66	2018
464	unc-62	WBGene00006796	T28F12.2	OP602	Anthony Hyman non-commercial eGFP modENCODE antibody 1	L4larva	HD - TALE	Bombardment	231	2018
465	unc-62	WBGene00006796	T28F12.2	OP600	Anthony Hyman non-commercial eGFP modENCODE antibody 1	L2larva	HD - TALE	Bombardment	262	2018
466	unc-62	WBGene00006796	T28F12.2	OP600	Anthony Hyman non-commercial eGFP modENCODE antibody 1	mixedstage_embryonic	HD - TALE	Bombardment	2223	2018
467	unc-86	WBGene00006818	C30A5.7	OP476	Kevin White goat-anti-GFP-UC	lateembryonic	HD - POU	Bombardment	563	2018
468	unc-86	WBGene00006818	C30A5.7	OP476	Kevin White goat-anti-GFP-UC	L1larva	HD - POU	Bombardment	2519	2018
469	vab-15	WBGene00006881	R07B1.1	XIL99	Kevin White goat-anti-GFP-UC	L1larva	HD - NK	CRISPR	604	2018
470	vab-7	WBGene00006873	M142.4	RW12267	Kevin White goat-anti-GFP-UC	L4larva	HD - HOX	CRISPR	1815	2024
471	W03F9.2	WBGene00021000	W03F9.2	OP215	Anthony Hyman non-commercial eGFP modENCODE antibody 1	L4youngadult	ZF - C2H2 - 1 finger	Bombardment	2659	2018
472	xbp-1	WBGene00006959	R74.3	OP506	Kevin White goat-anti-GFP-UC	L1larva	bZIP	Bombardment	2955	2018
473	Y105C5A.15	WBGene00013639	Y105C5A.15	OP773	Kevin White goat-anti-GFP-UC	L4larva	ZF - BED	Bombardment	1046	2024
474	Y116A8C.19	WBGene00013796	Y116A8C.19	OP532	Kevin White goat-anti-GFP-UC	L1larva	ZF - C3H1 - 2 fingers	Bombardment	133	2018
475	Y22D7AL.16	WBGene00021254	Y22D7AL.16	OP615	Kevin White goat-anti-GFP-UC	lateembryonic	ZF - C2H2 - 2 fingers	Bombardment	409	2018
476	Y48G9A.11	WBGene00021704	Y48G9A.11	RW12291	Kevin White goat-anti-GFP-UC	L4larva	ZF - C2H2 - 2 fingers	CRISPR	2228	2024
477	Y53G8AR.9	WBGene00021816	Y53G8AR.9	RW12264	Kevin White goat-anti-GFP-UC	youngadult	ZF - CCCH - 2 domains	CRISPR	2742	2024
478	Y55F3AM.14	WBGene00021931	Y55F3AM.14	OP608	Kevin White goat-anti-GFP-UC	L2larva	ZF - C2H2 - 9 fingers	Bombardment	1004	2024
479	Y56A3A.18	WBGene00013236	Y56A3A.18	RW12265	Kevin White goat-anti-GFP-UC	youngadult	ZF - C2H2 - 1 finger	CRISPR	1826	2024
480	Y5F2A.4	WBGene00012385	Y5F2A.4	OP682	Kevin White goat-anti-GFP-UC	L4larva	ZF - C2H2 - 5 fingers	Bombardment	390	2024
481	Y67H2A.10	WBGene00013465	Y67H2A.10	RW12295	Kevin White goat-anti-GFP-UC	youngadult	ZF - C2H2 - 3 fingers	CRISPR	709	2024
482	Y75B8A.6	WBGene00013543	Y75B8A.6	RW12275	Kevin White goat-anti-GFP-UC	L4larva	CxxC	CRISPR	933	2024
483	Y79H2A.3	WBGene00013580	Y79H2A.3	RW12273	Kevin White goat-anti-GFP-UC	youngadult	ZF - C2H2 - 3 fingers	CRISPR	1021	2024
484	Y95B8A.8	WBGene00022388	Y95B8A.8	RW12277	Kevin White goat-anti-GFP-UC	youngadult	ZF - C2H2	CRISPR	1694	2024
485	zag-1	WBGene00006970	F28F9.1	OP83	Anthony Hyman non-commercial eGFP modENCODE antibody 1	L2larva	ZF - C2H2 - 4 fingers, HD - ZFHD	Bombardment	1375	2018
486	zag-1	WBGene00006970	F28F9.1	OP83	Anthony Hyman non-commercial eGFP modENCODE antibody 1	L3larva	ZF - C2H2 - 4 fingers, HD - ZFHD	Bombardment	177	2018
487	zag-1	WBGene00006970	F28F9.1	OP83	Anthony Hyman non-commercial eGFP modENCODE antibody 1	L4larva	ZF - C2H2 - 4 fingers, HD - ZFHD	Bombardment	92	2018
488	zag-1	WBGene00006970	F28F9.1	OP83	Anthony Hyman non-commercial eGFP modENCODE antibody 1	L1larva	ZF - C2H2 - 4 fingers, HD - ZFHD	Bombardment	364	2018
489	zfh-2	WBGene00022518	ZC123.3	RW12167	Kevin White goat-anti-GFP-UC	youngadult	ZF - C2H2 - 9 fingers, HD - 3 domains	CRISPR	7087	2024
490	zfp-2	WBGene00009448	F35H8.3	OP534	Kevin White goat-anti-GFP-UC	L4larva	ZF - C2H2 - 7 fingers	Bombardment	696	2018
491	zfp-3	WBGene00021047	W05H7.4	RW12271	Kevin White goat-anti-GFP-UC	L4larva	ZF - C2H2 - 1 fingers	CRISPR	2010	2024
492	zim-3	WBGene00011601	T07G12.11	OP581	Kevin White goat-anti-GFP-UC	youngadult	ZF - C2H2 - 1 finger	Bombardment	1862	2018
493	zip-11	WBGene00021082	W08E12.1	OP761	Kevin White goat-anti-GFP-UC	L4larva	bZIP	Bombardment	364	2024
494	zip-2	WBGene00019327	K02F3.4	OP432	Anthony Hyman non-commercial eGFP modENCODE antibody 1	L4larva	bZIP	Bombardment	494	2018
495	zip-4	WBGene00021552	Y44E3B.1	OP590	Kevin White goat-anti-GFP-UC	L1larva	bZIP	Bombardment	1147	2024
496	zip-5	WBGene00007932	C34D1.5	OP544	Kevin White goat-anti-GFP-UC	lateembryonic	bZIP	Bombardment	564	2018
497	zip-8	WBGene00017755	F23F12.9	OP327	Anthony Hyman non-commercial eGFP modENCODE antibody 1	mixedstage_embryonic	bZIP	Bombardment	1705	2024
498	ZK185.1	WBGene00022681	ZK185.1	OP474	Kevin White goat-anti-GFP-UC	youngadult	ZF - C2H2 - 1 finger	Bombardment	1498	2018
499	ZK337.2	WBGene00013970	ZK337.2	RW12326	Kevin White goat-anti-GFP-UC	L4larva	ZF - C2H2 - 4 fingers	CRISPR	1043	2024
500	ZK546.5	WBGene00022762	ZK546.5	OP231	Anthony Hyman non-commercial eGFP modENCODE antibody 1	L3larva	ZF - C2H2 - 3 fingers	Bombardment	309	2018
501	ZK546.5	WBGene00022762	ZK546.5	OP231	Anthony Hyman non-commercial eGFP modENCODE antibody 1	L4larva	ZF - C2H2 - 3 fingers	Bombardment	234	2018
502	ZK546.5	WBGene00022762	ZK546.5	OP231	Anthony Hyman non-commercial eGFP modENCODE antibody 1	L2larva	ZF - C2H2 - 3 fingers	Bombardment	527	2018
503	ZK546.5	WBGene00022762	ZK546.5	OP231	Anthony Hyman non-commercial eGFP modENCODE antibody 1	L4larva	ZF - C2H2 - 3 fingers	Bombardment	103	2018
504	znf-207	WBGene00007105	B0035.1	xtl1186	Kevin White goat-anti-GFP-UC	youngadult	ZF - C2H2 - 2 fingers	Bombardment	742	2024
505	ztf-1	WBGene00018833	F54F2.5	OP207	Kevin White goat-anti-GFP-UC	L2larva	ZF - C2H2 - 4 fingers	Bombardment	238	2024
506	ztf-11	WBGene00009939	F52F12.6	OP236	Anthony Hyman non-commercial eGFP modENCODE antibody 1	L1larva	ZF - C2HC - 2 fingers	Bombardment	48	2018
507	ztf-11	WBGene00009939	F52F12.6	OP236	Anthony Hyman non-commercial eGFP modENCODE antibody 1	mixedstage_embryonic	ZF - C2HC - 2 fingers	Bombardment	415	2018
508	ztf-11	WBGene00009939	F52F12.6	OP511	Kevin White goat-anti-GFP-UC	L1larva	ZF - C2HC - 2 fingers	Bombardment	988	2018
509	ztf-11	WBGene00009939	F52F12.6	OP236	Anthony Hyman non-commercial eGFP modENCODE antibody 1	L3larva	ZF - C2HC - 2 fingers	Bombardment	101	2018
510	ztf-11	WBGene00009939	F52F12.6	OP236	Anthony Hyman non-commercial eGFP modENCODE antibody 1	L4larva	ZF - C2HC - 2 fingers	Bombardment	47	2018
511	ztf-11	WBGene00009939	F52F12.6	OP236	Anthony Hyman non-commercial eGFP modENCODE antibody 1	L2larva	ZF - C2HC - 2 fingers	Bombardment	138	2018
512	ztf-16	WBGene00019960	R08E3.4	OP558	Kevin White goat-anti-GFP-UC	lateembryonic	ZF - C2H2 - 8 fingers	Bombardment	558	2018
513	ztf-18	WBGene00020763	T24C4.7	OP496	Kevin White goat-anti-GFP-UC	youngadult	ZF - C2H2 - 1 finger	Bombardment	2473	2018
514	ztf-22	WBGene00012988	Y48C3A.4	OP676	Kevin White goat-anti-GFP-UC	youngadult	ZF - C2H2 - 4 fingers	Bombardment	601	2024
515	ztf-23	WBGene00021846	Y54E10BR.8	RW12279	Kevin White goat-anti-GFP-UC	midembryonic	ZF - C2H2 - 6 fingers	CRISPR	2413	2024
516	ztf-25	WBGene00012405	Y6G8.3	RW12287	Kevin White goat-anti-GFP-UC	youngadult	ZF - C2H2 - 2 fingers	CRISPR	1368	2024
517	ztf-26	WBGene00010137	F55H12.6	OP565	Kevin White goat-anti-GFP-UC	youngadult	ZF - C2H2 - 3 fingers	Bombardment	1179	2018
518	ztf-28	WBGene00018099	F36F12.8	RW12281	Kevin White goat-anti-GFP-UC	youngadult	ZF - C2H2 - 2 fingers	CRISPR	1137	2024
519	ztf-29	WBGene00013438	Y66D12A.12	RW12283	Kevin White goat-anti-GFP-UC	midembryonic	ZF - C2H2 - 2 fingers	CRISPR	1114	2024
520	ztf-3	WBGene00016905	C53D5.4	OP614	Kevin White goat-anti-GFP-UC	youngadult	ZF - C2H2 - 1 finger	Bombardment	261	2024
521	ztf-4	WBGene00020399	T10B11.3	OP322	Anthony Hyman non-commercial eGFP modENCODE antibody 1	L3larva	ZF - C2H2 - 1 finger	Bombardment	754	2018
522	ztf-4	WBGene00020399	T10B11.3	OP322	Anthony Hyman non-commercial eGFP modENCODE antibody 1	L1larva	ZF - C2H2 - 1 finger	Bombardment	1179	2018
523	ztf-4	WBGene00020399	T10B11.3	OP322	Anthony Hyman non-commercial eGFP modENCODE antibody 1	L2larva	ZF - C2H2 - 1 finger	Bombardment	1597	2018
524	ztf-6	WBGene00012317	W06H12.1	RW12301	Kevin White goat-anti-GFP-UC	youngadult	ZF - C2H2 - 2 fingers	CRISPR	605	2024
525	ztf-7	WBGene00009772	F46B6.7	OP332	Anthony Hyman non-commercial eGFP modENCODE antibody 1	L4larva	ZF - C2H2 - 4 fingers	Bombardment	2032	2018

## Sheet: S8.Worm NonTFs with ChIP-seq
	Gene_name	Wormbase_ID	Sequence_name	Strain	Antibody	Stage	Classification	Method	Peaks	Publication Date	Notes
1	akir-1	WBGene00017088	E01A2.6	IG1654	Kevin White goat-anti-GFP-UC	youngadult	Co-regulator	CRISPR	770	2024
2	aly-1	WBGene00000120	C01F6.5	OP502	Kevin White goat-anti-GFP-UC	earlyembryonic	RNA binding	bombardment	685	2018
3	aly-2	WBGene00000121	F23B2.6	OP217	Anthony Hyman non-commercial eGFP modENCODE antibody 1	L2larva	RNA binding	bombardment	97	2018
4	aly-2	WBGene00000121	F23B2.6	OP217	Anthony Hyman non-commercial eGFP modENCODE antibody 1	L4larva	RNA binding	bombardment	16	2018
5	aly-2	WBGene00000121	F23B2.6	OP217	Anthony Hyman non-commercial eGFP modENCODE antibody 1	L1larva	RNA binding	bombardment	872	2018
6	aly-2	WBGene00000121	F23B2.6	OP217	Anthony Hyman non-commercial eGFP modENCODE antibody 1	L3larva	RNA binding	bombardment	103	2018
7	ama-1	WBGene00000123	F36A4.7	N2	RNA Polymerase II Antibody (Covance Cat# MMS-126R, RRID:AB_10013665)	L4larva	RNA Polymerase II component	Antibody	2697	2018
8	ama-1	WBGene00000123	F36A4.7	N2	RNA Polymerase II Antibody (Covance Cat# MMS-126R, RRID:AB_10013665)	lateembryonic	RNA Polymerase II component	Antibody	1490	2018
9	ama-1	WBGene00000123	F36A4.7	N2	RNA Polymerase II Antibody (Covance Cat# MMS-126R, RRID:AB_10013665)	youngadult	RNA Polymerase II component	Antibody	1013	2018
10	ama-1	WBGene00000123	F36A4.7	N2	RNA Polymerase II Antibody (Covance Cat# MMS-126R, RRID:AB_10013665)	L2larva	RNA Polymerase II component	Antibody	2873	2018
11	ama-1	WBGene00000123	F36A4.7	N2	RNA Polymerase II Antibody (Covance Cat# MMS-126R, RRID:AB_10013665)	L3larva	RNA Polymerase II component	Antibody	4749	2018
12	ama-1	WBGene00000123	F36A4.7	YL503	Anthony Hyman non-commercial eGFP modENCODE antibody 1	youngadult	RNA Polymerase II component	bombardment	347	2018
13	ama-1	WBGene00000123	F36A4.7	YL489	Anthony Hyman non-commercial eGFP modENCODE antibody 1	youngadult	RNA Polymerase II component	bombardment	454	2018
14	ama-1	WBGene00000123	F36A4.7	N2	RNA Polymerase II Antibody (Covance Cat# MMS-126R, RRID:AB_10013665)	earlyembryonic	RNA Polymerase II component	Antibody	988	2018
15	ama-1	WBGene00000123	F36A4.7	N2	RNA Polymerase II Antibody (Covance Cat# MMS-126R, RRID:AB_10013665)	L1larva	RNA Polymerase II component	Antibody	1421	2018
16	B0336.3	WBGene00000123	F36A4.7	OP801	Kevin White goat-anti-GFP-UC	youngadult	RNA binding	bombardment	3344	2024
17	C06A6.2	WBGene00015507	C06A6.2	OP810	Kevin White goat-anti-GFP-UC	youngadult	Uncharacterized	bombardment	1346	2024
18	C08G9.2	WBGene00015620	C08G9.2	OP513	Kevin White goat-anti-GFP-UC	lateembryonic	Endopeptidase activity	bombardment	1188	2018	Moved to non TF list in 2024
19	C17E4.6	WBGene00007645	C17E4.6	RW12293	Kevin White goat-anti-GFP-UC	youngadult	Chromatin factor	CRISPR	1017	2024
20	C34F6.9	WBGene00007943	C34F6.9	OP324	Anthony Hyman non-commercial eGFP modENCODE antibody 1	L2larva	Peptidase	bombardment	4843	2018	Moved to non TF list in 2024
21	cey-2	WBGene00000473	F46F11.2	OP358	Anthony Hyman non-commercial eGFP modENCODE antibody 1	L4larva	RNA binding	bombardment	406	2018	Moved to non TF list in 2024
22	chd-7	WBGene00007053	T04D1.4	OP609	Kevin White goat-anti-GFP-UC	youngadult	Chromatin factor	bombardment	2995	2018	Moved to non TF list in 2024
23	dao-5	WBGene00000931	C25A1.10	OP252	Kevin White goat-anti-GFP-UC	L4youngadult	rDNA transcription	bombardment	310	2018
24	F13C5.2	WBGene00017423	F13C5.2	OP605	Kevin White goat-anti-GFP-UC	earlyembryonic	Co-regulator	bombardment	1399	2018	Moved to non TF list in 2024
25	F16B12.6	WBGene00008882	F16B12.6	OP114	Anthony Hyman non-commercial eGFP modENCODE antibody 1	L1larva	Uncharacterized	bombardment	2183	2018	Moved to non TF list in 2024
26	F55B11.4	WBGene00010086	F55B11.4	OP385	Kevin White goat-anti-GFP-UC	youngadult	Uncharacterized	bombardment	18	2018	Moved to non TF list in 2024
27	F57A8.1	WBGene00010177	F57A8.1	OP757	Kevin White goat-anti-GFP-UC	youngadult	Uncharacterized	bombardment	315	2024
28	flt-1	WBGene00001470	ZK783.4	OP797	Kevin White goat-anti-GFP-UC	earlyembryonic	Chromatin factor	bombardment	1083	2024
29	flt-1	WBGene00001470	ZK783.4	RW12255	Kevin White goat-anti-GFP-UC	midembryonic	Chromatin factor	CRISPR	2849	2024
30	him-1	WBGene00001860	F28B3.7	YL577	Kevin White goat-anti-GFP-UC	youngadult	Chromatin factor	bombardment	1057	2018
31	him-1	WBGene00001860	F28B3.7	YL576	Kevin White goat-anti-GFP-UC	L4youngadult	Chromatin factor	bombardment	1356	2018
32	hmg-1.2	WBGene00001972	F47D12.4	RW12210	Kevin White goat-anti-GFP-UC	youngadult	HMG box - 2 domains	CRISPR	6058	2024
33	hpl-2	WBGene00001996	K01G5.2	YL474	Anthony Hyman non-commercial eGFP modENCODE antibody 1	L1larva	Chromatin factor	bombardment	627	2018
34	hrde-1	WBGene00007624	C16C10.3	YL557	Kevin White goat-anti-GFP-UC	youngadult	RNA binding	bombardment	1080	2018
35	isw-1	WBGene00002169	F37A4.8	OP181	Kevin White goat-anti-GFP-UC	L1larva	Chromatin factor	bombardment	2210	2024
36	lin-35	WBGene00003020	C32F10.2	YL402	Anthony Hyman non-commercial eGFP modENCODE antibody 1	youngadult	Co-regulator	bombardment	273	2018
37	lin-35	WBGene00003020	C32F10.2	YL409	Anthony Hyman non-commercial eGFP modENCODE antibody 1	L1larva	Co-regulator	bombardment	4148	2018
38	lin-35	WBGene00003020	C32F10.2	YL468	Anthony Hyman non-commercial eGFP modENCODE antibody 1	youngadult	Co-regulator	bombardment	369	2018
39	lin-35	WBGene00003020	C32F10.2	YL521	Anthony Hyman non-commercial eGFP modENCODE antibody 1	youngadult	Co-regulator	bombardment	1913	2018
40	lin-35	WBGene00003020	C32F10.2	YL398	Anthony Hyman non-commercial eGFP modENCODE antibody 1	L1larva	Co-regulator	bombardment	7990	2018
41	mdt-29	WBGene00007025	K08E3.8	RJP4521	Kevin White goat-anti-GFP-UC	L4larva	Co-regulator	CRISPR	1705	2024
42	mes-2	WBGene00003220	R06A4.7	OP248	Kevin White goat-anti-GFP-UC	L4larva	Chromatin factor	bombardment	5124	2018
43	mes-4	WBGene00003222	Y2H9A.1	RW10325	Kevin White goat-anti-GFP-UC	youngadult	Chromatin factor	bombardment	271	2018
44	oef-1	WBGene00018636	F49E8.2	OP383	Kevin White goat-anti-GFP-UC	L4larva	Chromatin/splicing	bombardment	1276	2018	Moved to non TF list in 2024
45	oef-1	WBGene00018636	F49E8.2	OP383	Anthony Hyman non-commercial eGFP modENCODE antibody 1	youngadult	Chromatin/splicing	bombardment	1152	2018	Moved to non TF list in 2024
46	pbrm-1	WBGene00007042	C26C6.1	RW12226	Kevin White goat-anti-GFP-UC	youngadult	Chromatin factor	CRISPR	3243	2024
47	pie-1	WBGene00004027	Y49E10.14	RW12313	Kevin White goat-anti-GFP-UC	earlyembryonic	RNA binding	CRISPR	1005	2024
48	pole-4	WBGene00013150	Y53F4B.3	RW12270	Kevin White goat-anti-GFP-UC	youngadult	DNA replication	CRISPR	465	2024
49	rbr-2	WBGene00004319	ZK593.4	OP195	Kevin White goat-anti-GFP-UC	L4larva	Chromatin factor	bombardment	3098	2018	Moved to non TF list in 2024
50	rec-8	WBGene00004333	W02A2.6	YL563	Kevin White goat-anti-GFP-UC	youngadult	Chromatin factor	bombardment	437	2018
51	rec-8	WBGene00004333	W02A2.6	YL581	Kevin White goat-anti-GFP-UC	youngadult	Chromatin factor	bombardment	479	2018
52	rpc-1	WBGene00004411	C42D4.8	N2	RPC-1 Antibody Novus Biologicals Catalog #5333.00.02	youngadult	RNA Pol III component	Antibody	1277	2018
53	rpc-1	WBGene00004411	C42D4.8	YL517	Anthony Hyman non-commercial eGFP modENCODE antibody 1	youngadult	RNA Pol III component	bombardment	3902	2018
54	sdc-2	WBGene00004746	C35C5.1	OP92	Kevin White goat-anti-GFP-UC	lateembryonic	Dosage compensation	bombardment	1010	2018	Moved to non TF list in 2024
55	set-16	WBGene00011729	T12D8.1	RW12223	Kevin White goat-anti-GFP-UC	L4larva	Chromatin factor	CRISPR	6905	2024
56	snpc-1.1	WBGene00015513	C06A8.2	YL482	Anthony Hyman non-commercial eGFP modENCODE antibody 1	youngadult	snRNA transcription	bombardment	961	2018
57	snpc-1.2	WBGene00012715	Y39E4B.2	RW12251	Kevin White goat-anti-GFP-UC	L4larva	snRNA transcription	CRISPR	2842	2018
58	snpc-1.3	WBGene00017265	F08F3.9	YL485	Anthony Hyman non-commercial eGFP modENCODE antibody 1	youngadult	snRNA transcription, male piRNA transcription	bombardment	1545	2018
59	snpc-3.4	WBGene00011367	T02C12.2	YL497	Anthony Hyman non-commercial eGFP modENCODE antibody 1	youngadult	snRNA transcription	bombardment	2750	2018	Moved to non TF list in 2024
60	spr-1	WBGene00005006	D1014.8	OP521	Kevin White goat-anti-GFP-UC	L4larva	Chromatin factor	bombardment	1289	2018	Moved to non TF list in 2024
61	T26A5.8	WBGene00020823	T26A5.8	OP598	Kevin White goat-anti-GFP-UC	youngadult	Chromatin factor	bombardment	567	2018	Moved to non TF list in 2024
62	tbp-1	WBGene00006542	T20B12.2	OP746	Kevin White goat-anti-GFP-UC	youngadult	Basal TF	bombardment	4824	2024
63	tlf-1	WBGene00006577	F39H11.2	OP749	Kevin White goat-anti-GFP-UC	youngadult	Basal TF	bombardment	1211	2024
64	unc-98	WBGene00006827	F08C6.7	OP85	Kevin White goat-anti-GFP-UC	L1larva	Cytoskeleton protein	bombardment	790	2018
65	xnd-1	WBGene00001514	C05D2.5	QP0661	Kevin White goat-anti-GFP-UC	youngadult	Chromatin factor	bombardment	2157	2018	Moved to non TF list in 2024

## Sheet: S9.Worm TF strains not ChIPd
	Gene_name_old	Wormbase_ID	Gene_name	Sequence_name	Status	All_strains	Domains_from_Fuxmann Bass et al. 2016/Uniprot	ChIP_seq	Notes
1	ada-2	WBGene00017967	ada-2	F32A5.1	Cytoplasmic	OP684	ZF - C2H2 - 1 finger	No	Discontinued
2	aptf-1	WBGene00019424	aptf-1	K06A1.1	Cytoplasmic	OP584, OP585	AP-2	No	Discontinued
3	aptf-4	WBGene00009202	aptf-4	F28C6.1	Insufficient Expression	RW12286	AP-2	No	Discontinued
4	ast-1	WBGene00020368	ast-1	T08H4.3	Failed ChIP-seq multiple times, discontinued	RW12175	WH - ETS	ChIP attempted	Discontinued
5	atf-2	WBGene00000220	atf-2	K08F8.2	Insufficient Expression	RW12307	bZIP - 2 domains	No	Discontinued
6	atf-6	WBGene00000222	atf-6	F45E6.2	Cytoplasmic	OP683	bZIP	No	Discontinued
7	atfs-1	WBGene00013878	atfs-1	ZC376.7	Cytoplasmic	OP675	bZIP	No	Discontinued
8	athp-3	WBGene00013799	athp-3	Y116A8C.22	Cytoplasmic	OP582, OP583	AT Hook x5	No	Discontinued
9	attf-2	WBGene00017317	attf-2	F09G2.9	Failed ChIP-seq multiple times, discontinued	OP657	AT Hook x3	ChIP attempted	Discontinued
10	B0336.7	WBGene00015147	B0336.7	B0336.7	Failed ChIP-seq multiple times, discontinued	OP714	ZF - THAP	ChIP attempted	Discontinued
11	bnc-1	WBGene00044791	bnc-1	F55C5.11	Cytoplasmic	OP751	ZF - C2H2	No	Discontinued
12	C02F5.12	WBGene00015352	C02F5.12	C02F5.12	Failed ChIP-seq multiple times, discontinued	OP772	ZF - C2H2 - 1 finger	ChIP attempted	Discontinued
13	camt-1	WBGene00020251	camt-1	T05C1.4	Cytoplasmic	OP648	IPT/TIG	No	Discontinued
14	D1081.8	WBGene00008386	cdc-5L	D1081.8	Cytoplasmic	OP183	MYB - 2 domains	No	Discontinued
15	ceh-1	WBGene00000428	ceh-1	F16H11.4	Failed ChIP-seq multiple times, discontinued	OP150, OP571	HD - NK	ChIP attempted	Discontinued
16	ceh-10	WBGene00000435	ceh-10	W03A3.1	Failed ChIP-seq multiple times, discontinued	RW12170 (strain ChIP'd), RW12171	HD - PRD	ChIP attempted	Discontinued
17	ceh-21	WBGene00000444	ceh-21	T26C11.6	Failed ChIP-seq multiple times, discontinued	OP103	HD - CUT	ChIP attempted	Discontinued
18	ceh-23	WBGene00000446	ceh-23	ZK652.5	Failed ChIP-seq multiple times, discontinued	OP767	HD - NK	ChIP attempted	Discontinued
19	ceh-33	WBGene00000454	ceh-33	C10G8.7	Cytoplasmic	OP187, OP575	HD - SIX	No	Discontinued
20	ceh-41	WBGene00000462	ceh-41	T26C11.5	Poor binding, discontinued	OP759	HD - CUT	ChIP attempted	Discontinued
21	ceh-49	WBGene00017538	ceh-49	F17A9.6	Failed ChIP-seq multiple times, discontinued	OP771	HD - CUT	ChIP attempted	Discontinued
22	ceh-53	WBGene00015651	ceh-53	C09G12.1	Insufficient Expression	OP444, OP445, OP446	HD - PRD	No	Discontinued
23	ceh-54	WBGene00020485	ceh-54	T13C5.4	Insufficient Expression	OP456	HD - PRD	No	Discontinued
24	ceh-57	WBGene00007416	ceh-57	C07E3.5	Insufficient Expression	OP706	HD	No	Discontinued
25	ceh-7	WBGene00000432	ceh-7	C34C6.8	Insufficient Expression	OP168	HD	No	Discontinued
26	ceh-74	WBGene00013876	ceh-74	ZC376.4	Failed ChIP-seq multiple times, discontinued	OP680	HD	ChIP attempted	Discontinued
27	ceh-75	WBGene00008242	ceh-75	C50H2.6	Cytoplasmic	PHX1884	HD - NK	No	Discontinued
28	ceh-86	WBGene00018355	ceh-86	F42G2.6	Cytoplasmic	RW12297, RW12298	HD	No	Discontinued
29	ceh-87	WBGene00018022	ceh-87	F34D6.2	Insufficient Expression	PHX1955	HD	No	Discontinued
30	ceh-89	WBGene00009231	ceh-89	F28H6.2	ChIP-seq completed after data freeze	OH16505	HD - POU	Yes	ChIP-seq completed after data freeze
31	cep-1	WBGene00000467	cep-1	F52B5.5	Failed ChIP-seq multiple times, discontinued	OP793	p53	ChIP attempted	Discontinued
32	ces-2	WBGene00000469	ces-2	ZK909.4	Insufficient Expression	RW12328	bZIP	No	Discontinued
33	cey-1	WBGene00000472	cey-1	F33A8.3	Cytoplasmic	OP375, OP302	COLD BOX	No	Discontinued
34	cey-3	WBGene00000474	cey-3	M01E11.5	Cytoplasmic	OP671	COLD BOX	No	Discontinued
35	cfi-1	WBGene00000476	cfi-1	T23D8.8	Not completed	RW12195	ARID/BRIGHT	Yes	Not completed
36	crh-1	WBGene00000793	crh-1	Y41C4A.4	ChIP-seq completed after data freeze	RW12338	bZIP	Yes	ChIP-seq completed after data freeze
37	daf-3	WBGene00000899	daf-3	F25E2.5	Cytoplasmic	RW12204, RW12205	MH1	No	Discontinued
38	dmd-3	WBGene00012832	dmd-3	Y43F8C.10	Male expression	OH15733, RW12247	ZF - DM	No	Discontinued
39	dmd-5	WBGene00017326	dmd-5	F10C1.5	Failed ChIP-seq multiple times, discontinued	OP115	ZF - DM	ChIP attempted	Discontinued
40	dmd-7	WBGene00019521	dmd-7	K08B12.2	Cytoplasmic	OP495	ZF - DM	No	Discontinued
41	dnj-11	WBGene00001029	dnj-11	F38A5.13	Cytoplasmic	RW12337	MYB - 2 domains	No	Discontinued
42	dnj-17	WBGene00001035	dnj-17	T03F6.2	Cytoplasmic	OP492, OP498	ZF - C2H2 - 2 fingers	No	Discontinued
43	efl-2	WBGene00001162	efl-2	Y48C3A.17	Pending ChIP-seq	RW12354	WH - TDP	No	Not completed
44	egl-38	WBGene00001204	egl-38	C04G2.7	ChIP-seq completed after data freeze	OP171	Paired Domain - FULL	Yes	ChIP-seq completed after data freeze
45	elt-7	WBGene00015981	elt-7	C18G1.2	Strain had a phenotype	RW10455 (aka OP52)	ZF - GATA	ChIP attempted	Discontinued
46	end-1	WBGene00001310	end-1	F58E10.2	ChIP-seq completed after data freeze	RW12352	ZF - GATA	Yes	ChIP-seq complete after data freeze
47	end-3	WBGene00001311	end-3	F58E10.5	Insufficient expression	OP780	ZF - GATA	No	Discontinued
48	ets-9	WBGene00016865	ets-9	C52B9.2	Insufficient Expression	OP613	WH - ETS x2	No	Discontinued
49	F19F10.1	WBGene00017598	F19F10.1	F19F10.1	Cytoplasmic	RW12347	WH - ETS	No	Discontinued
50	F21D5.9	WBGene00009014	F21D5.9	F21D5.9	Insufficient Expression	OP386	ZF - C2H2 - 1 finger	No	Discontinued
51	F21G4.5	WBGene00009026	F21G4.5	F21G4.5	Insufficient Expression	OP607	ZF - C2H2 - 1 finger	No	Discontinued
52	F40G9.14	WBGene00018248	F40G9.14	F40G9.14	Cytoplasmic	OP633	ZF - C2H2 - 1 finger	No	Discontinued
53	F54F2.9	WBGene00018836	F54F2.9	F54F2.9	Cytoplasmic	OP695	MYB - 2 domains	No	Discontinued
54	F58G1.2	WBGene00010264	F58G1.2	F58G1.2	Discontinued, wrong expression pattern	RW12350	ZF - C2H2 - 6 fingers	No	Discontinued
55	fkh-9	WBGene00001441	fkh-9	K03C7.2	ChIP-seq not attempted	RW12356	WH - Fork Head	No	ChIP-seq not attempted
56	flh-2	WBGene00016138	flh-2	C26E6.2	Insufficient Expression	OP504	ZF - FLYWCH	No	Discontinued
57	gei-3	WBGene00001560	gei-3	T22H6.6	Insufficient Expression	OP180	HMG box	No	Discontinued
58	hbl-1	WBGene00001824	hbl-1	F13D11.2	Insufficient expression	OP160	ZF - C2H2 - 9 fingers	No	Discontinued
59	hizr-1	WBGene00013976	hizr-1	ZK455.6	nhr	OP394	ZF - NHR	No	Discontinued
60	hlh-14	WBGene00001958	hlh-14	C18A3.8	Insufficient Expression	RW12346	bHLH	No	Discontinued
61	hlh-2	WBGene00001949	hlh-2	M05B5.5	Cytoplasmic	OP712	bHLH	No	Discontinued
62	hlh-25	WBGene00001964	hlh-25	C17C3.7	Insufficient Expression	OP61	bHLH	No	Discontinued
63	hlh-3	WBGene00001950	hlh-3	T24B8.6	Cytoplasmic	OP650	bHLH	No	Discontinued
64	hlh-32	WBGene00013665	hlh-32	Y105C5B.29	Insufficient Expression	RW12256	bHLH	No	Discontinued
65	hmg-3	WBGene00001973	hmg-3	C32F10.5	ChIP-seq not attempted	RW12357	HMG box	No	ChIP-seq not attempted
66	hmg-5	WBGene00001975	hmg-5	F45E4.9	Cytoplasmic	RW12217	HMG box - 2 domains	No	Discontinued
67	K04C1.3	WBGene00010553	K04C1.3	K04C1.3	Insufficient Expression	OP717	ZF - C2H2 - 1 finger	No	Discontinued
68	K10B3.5	WBGene00019611	K10B3.5	K10B3.5	Insufficient Expression	OP668, OP734	ZF - C2H2 - 2 fingers	No	Discontinued
69	klf-3	WBGene00003480	klf-3	F54H5.4	Failed ChIP-seq multiple times, discontinued	OP755	ZF - C2H2 - 3 fingers	ChIP attempted	Discontinued
70	ZC328.2	WBGene00022592	klu-2	ZC328.2	Cytoplasmic	OP735	ZF - C2H2 - 3 fingers	No	Discontinued
71	K05F1.5	WBGene00019407	lect-2	K05F1.5	Insufficient Expression	OP499, OP501	ZF - C2H2 - 1 finger	No	Discontinued
72	let-381	WBGene00002601	let-381	F26B1.7	Insufficient Expression	OP119, OP122, OP123	WH - Fork Head	No	Discontinued
73	lfi-1	WBGene00022500	lfi-1	ZC8.4	Cytoplasmic	OP732	bZIP	No	Discontinued
74	lim-4	WBGene00002987	lim-4	ZC64.4	Cytoplasmic	OP681, OP697, OP704	HD - LIM	No	Discontinued
75	lin-28	WBGene00003014	lin-28	F02E9.2	Cytoplasmic	OP535	COLD BOX	No	Discontinued
76	lin-36	WBGene00003021	lin-36	F44B9.6	ChIP-seq not attempted	RW12355	ZF - C2H2 - 1 finger	No	ChIP-seq not attempted
77	lir-2	WBGene00003045	lir-2	F18A1.4	Failed ChIP-seq multiple times, discontinued	OP251, OP175	ZF - C2H2 - 1 finger	ChIP attempted	Discontinued
78	mab-3	WBGene00003100	mab-3	Y53C12B.5	Failed ChIP-seq multiple times, discontinued	OH15732 (strain ChIP'd), RW12246	ZF - DM - 2 domains	ChIP attempted	Discontinued
79	madf-1	WBGene00021942	madf-1	Y55F3BR.5	ChIP-seq completed after data freeze	RW12345	MADF	Yes	ChIP-seq completed after data freeze
80	madf-11	WBGene00015468	madf-11	C05D2.6	Failed ChIP-seq multiple times, discontinued	OP798	MADF	ChIP attempted	Discontinued
81	mbl-1	WBGene00019347	mbl-1	K02H8.1	Failed ChIP-seq multiple times, discontinued	OP664	ZF - CCCH - 2 domains	ChIP attempted	Discontinued
82	mbr-1	WBGene00011315	mbr-1	T01C1.2	Cytoplasmic	OP595, OP596	HTH	No	Discontinued
83	med-2	WBGene00003181	med-2	K04C2.6	Cytoplasmic	RW10426 (aka OP53), RW10450 (aka OP48)	ZF - GATA	No	Discontinued
84	miz-1	WBGene00011259	miz-1	R13.4	Cytoplasmic	OP693	ZF - MIZ	No	Discontinued
85	mls-1	WBGene00003376	mls-1	H14A12.4	Failed ChIP-seq multiple times, discontinued	OP686, OP694 (OP694 strain ChIP'd)	T-box	ChIP attempted	Discontinued
86	pqn-47, myrf-1	WBGene00004134	myrf-1	F59B10.1	ChIP-seq completed after data freeze	PHX2564	p53	Yes	ChIP-seq completed after data freeze
87	myrf-2	WBGene00008999	myrf-2	F21A10.2	Cytoplasmic	OP710	p53	No	Discontinued
88	nfx-1	WBGene00007048	nfx-1	C16A3.7	Cytoplasmic	OP507	ZF - NF-X1 - 10 domains	No	Discontinued
89	nfyc-1	WBGene00017742	nfyc-1	F23F1.1	ChIP-seq completed after data freeze	RW12333	CBF	Yes	ChIP-seq completed after data freeze
90	nhr-100	WBGene00003690	nhr-100	C28D4.1	nhr	OP366, OP392, OP393	ZF - NHR	No	Discontinued
91	nhr-112	WBGene00003702	nhr-112	Y70C5C.6	nhr	OP364	ZF - NHR	No	Discontinued
92	nhr-116	WBGene00003706	nhr-116	F09C6.9	Cytoplasmic	OP226	ZF - NHR	ChIP attempted	Discontinued
93	nhr-124	WBGene00003714	nhr-124	C17E7.8	Low DCPM	OP417	ZF - NHR	No	Discontinued
94	nhr-127	WBGene00003717	nhr-127	T13F3.3	nhr	OP409, OP410	ZF - NHR	No	Discontinued
95	nhr-130	WBGene00003720	nhr-130	T01G6.8	Cytoplasmic	OP505	ZF - NHR	No	Discontinued
96	nhr-136	WBGene00003726	nhr-136	C13C4.3	nhr	OP408	ZF - NHR	No	Discontinued
97	nhr-137	WBGene00003727	nhr-137	C56E10.4	Failed ChIP-seq multiple times, discontinued	OP758	ZF - NHR	ChIP attempted	Discontinued
98	nhr-149	WBGene00015397	nhr-149	C03G6.12	Cytoplasmic	OP453, OP457	ZF - NHR	No	Discontinued
99	nhr-154	WBGene00007547	nhr-154	C13C4.2	Cytoplasmic	OP450	ZF - NHR	No	Discontinued
100	nhr-162	WBGene00016367	nhr-162	C33G8.10	Cytoplasmic	OP466	ZF - NHR	No	Discontinued
101	nhr-167	WBGene00008208	nhr-167	C49F5.4	Low DCPM	OP458, OP459	ZF - NHR	No	Discontinued
102	nhr-168	WBGene00008221	nhr-168	C50B6.8	Cytoplasmic	OP412	ZF - NHR	No	Discontinued
103	nhr-178	WBGene00017510	nhr-178	F16B4.9	Cytoplasmic	OP454, OP455	ZF - NHR	No	Discontinued
104	nhr-190	WBGene00018622	nhr-190	F48G7.11	Cytoplasmic	OP448	ZF - NHR	No	Discontinued
105	nhr-195	WBGene00019115	nhr-195	F59E11.10	Low DCPM	OP467	ZF - NHR	No	Discontinued
106	nhr-201	WBGene00019741	nhr-201	M02H5.3	Cytoplasmic	OP479	ZF - NHR	No	Discontinued
107	nhr-216	WBGene00020385	nhr-216	T09D3.4	Cytoplasmic	OP206	ZF - NHR	No	Discontinued
108	nhr-245	WBGene00014189	nhr-245	ZK1025.10	nhr	OP211	ZF - NHR	No	Discontinued
109	nhr-275	WBGene00021163	nhr-275	Y5H2A.2	Cytoplasmic	OP225	ZF - NHR	No	Discontinued
110	nhr-30	WBGene00016091	nhr-30	C25E10.1	nhr	OP384	ZF - NHR	No	Discontinued
111	nhr-40	WBGene00003630	nhr-40	T03G6.2	ChIP-seq completed after data freeze	RW12341	ZF - NHR	Yes	ChIP-seq completed after data freeze
112	nhr-62	WBGene00003652	nhr-62	Y67A6A.2	nhr	OP402, OP404	ZF - NHR	No	Discontinued
113	nhr-63	WBGene00003653	nhr-63	C06C6.4	nhr	OP413, OP414	ZF - NHR	No	Discontinued
114	nhr-7	WBGene00003606	nhr-7	F54D1.4	nhr	OP310	ZF - NHR	No	Discontinued
115	nhr-82	WBGene00003672	nhr-82	F41D3.1	nhr	OP421, OP422	ZF - NHR	No	Discontinued
116	npax-1	WBGene00017664	npax-1	F21D12.5	Insufficient Expression	OP626	Paired Domain - NPAX	No	Discontinued
117	npax-2	WBGene00018591	npax-2	F48B9.5	Insufficient Expression	OP741	Paired Domain - NPAX	No	Discontinued
118	nsy-7	WBGene00044508	nsy-7	C18F3.4	ChIP-seq completed after data freeze	RW12353	HD-like	Yes	ChIP-seq completed after data freeze
119	odr-7	WBGene00003854	odr-7	T18D3.2	Insufficient Expression	RW12342	ZF - NHR	No	Discontinued
120	pal-1	WBGene00003912	pal-1	C38D4.6	Insufficient Expression	OP380, OP94, OP95, OP96, OP97	HD - HOX	No	Discontinued
121	R151.8	WBGene00020111	R151.8	R151.8	Strain had a phenotype	OP672	MYB	No	Discontinued
122	saeg-1	WBGene00010012	saeg-1	F53H10.2	Failed ChIP-seq multiple times, discontinued	OP580	ZF - C2H2 - 1 finger	ChIP attempted	Discontinued
123	sbp-1	WBGene00004735	sbp-1	Y47D3B.7	Insufficient Expression	OP140	bHLH	No	Discontinued
124	sdc-1	WBGene00004745	sdc-1	F52E10.1	Cytoplasmic	RW12225	ZF - C2H2 - 2 fingers	No	Discontinued
125	sex-1	WBGene00004786	sex-1	F44A6.2	Strain had a phenotype	OP369	ZF - NHR	ChIP attempted	Discontinued
126	slr-2	WBGene00013350	slr-2	Y59A8B.13	Insufficient Expression	RW12343	ZF - C2H2 - 3 fingers	No	Discontinued
127	sma-2	WBGene00004856	sma-2	ZK370.2	Cytoplasmic	OP653, OP661	MH1	No	Discontinued
128	sox-3	WBGene00004950	sox-3	F40E10.2	Failed ChIP-seq multiple times, discontinued	RW12330	HMG box	ChIP attempted	Discontinued
129	spr-4	WBGene00005009	spr-4	C09H6.1	Cytoplasmic	OP805	ZF - C2H2 - 14 fingers	No	Discontinued
130	C28G1.4	WBGene00016189	sprp-4	C28G1.4	Insufficient Expression	OP630	ZF - C2H2 - 5 fingers	No	Discontinued
131	sptf-3	WBGene00012735	sptf-3	Y40B1A.4	ChIP-seq completed after data freeze	RW12349	ZF - C2H2 - 3 fingers	Yes	ChIP-seq complete after data freeze
132	sta-1	WBGene00013111	sta-1	Y51H4A.17	ChIP-seq completed after data freeze	RW12332	STAT	Yes	ChIP-seq completed after data freeze
133	sta-2	WBGene00010251	sta-2	F58E6.1	Cytoplasmic	RW12242	HD - PRD	No	Discontinued
134	swsn-1	WBGene00004203	swsn-1	Y113G7B.23	Failed ChIP-seq multiple times, discontinued	RW12187 (strain used), RW11188, RW12189	MYB	ChIP attempted	Discontinued
135	T22C8.3	WBGene00011924	T22C8.3	T22C8.3	Insufficient Expression	OP647	ZF - C2H2 - 1 finger	No	Discontinued
136	T27A8.2	WBGene00012074	T27A8.2	T27A8.2	Cytoplasmic	OP786, OP787	WH - Fork Head	No	Discontinued
137	tag-68	WBGene00006445	tag-68	F37D6.6	Cytoplasmic	OP447	MH1	No	Discontinued
138	tbx-36	WBGene00006555	tbx-36	ZK829.5	Cytoplasmic	OP715	T-box	No	Discontinued
139	T18D3.7	WBGene00011824	tsct-1	T18D3.7	Insufficient Expression	OP238, OP555	TSC-22/dip/bun	No	Discontinued
140	ttx-1	WBGene00006652	ttx-1	Y113G7A.6	ChIP-seq completed after data freeze	PHX1679	HD - PRD	Yes	ChIP-seq completed after data freeze
141	unc-4	WBGene00006744	unc-4	F26C11.2	ChIP-seq completed after data freeze	PHX1658	HD - PRD	Yes	ChIP-seq completed after data freeze
142	W04D2.4	WBGene00012243	W04D2.4	W04D2.4	Cytoplasmic	OP804	ZF - C2H2 - 1 finger	No	Discontinued
143	Y37E11B.1	WBGene00021374	Y37E11B.1	Y37E11B.1	Cytoplasmic	RW12351	ZF - C2H2 - 3 fingers	No	Discontinued
144	Y37F4.6	WBGene00021387	Y37F4.6	Y37F4.6	Cytoplasmic	OP738	ZF - C2H2 - 1 finger	No	Discontinued
145	Y47G6A.7	WBGene00021637	Y47G6A.7	Y47G6A.7	Insufficient Expression	RW12268, RW12269	ZF - C2H2 - 1 finger	No	Discontinued
146	Y53H1A.2	WBGene00013178	Y53H1A.2	Y53H1A.2	Insufficient expression	RW12261, RW12262	ZF - C2H2 - 1 finger	No	Discontinued
147	Y56A3A.28	WBGene00013240	Y56A3A.28	Y56A3A.28	ChIP-seq completed after data freeze	RW12344	ZF - C2H2 - 2 fingers	Yes	ChIP-seq complete after data freeze
148	zgpa-1	WBGene00016383	zgpa-1	C33H5.17	Failed ChIP-seq multiple times, discontinued	OP570	ZF - CCCH	ChIP attempted	Discontinued
149	zip-10	WBGene00012101	zip-10	T27F2.4	Insufficient Expression	OP634	bZIP	No	Discontinued
150	zip-7	WBGene00013100	zip-7	Y51H4A.4	ChIP-seq completed after data freeze	RW12339	bZIP	Yes	ChIP-seq completed after data freeze
151	ZK686.5	WBGene00022795	ZK686.5	ZK686.5	Cytoplasmic	RW12285	ZF - C2H2 - 3 fingers	No	Discontinued
152	ztf-14	WBGene00010936	ztf-14	M163.2	Insufficient Expression	OP782	ZF - C2H2 - 1 finger	No	Discontinued
153	ztf-15	WBGene00011066	ztf-15	R06C7.9	Insufficient Expression	OP431, OP451	ZF - C2H2 - 5 fingers	No	Discontinued
154	ztf-2	WBGene00008762	ztf-2	F13G3.1	Aberrant expression (only 10% of animals have expression)	OP796	ZF - C2H2 - 3 fingers	No	Discontinued
155	ztf-27	WBGene00011661	ztf-27	T09F3.1	Failed ChIP-seq multiple times, discontinued	OP705	ZF - C2H2 - 1 finger	ChIP attempted	Discontinued
156	ztf-30	WBGene00015523	ztf-30	C06E1.8	Strain had a phenotype	OP382	ZF - C2H2 - 2 fingers	No	Discontinued
157	T20H4.2	WBGene00020635	ztf-31	T20H4.2	Insufficient Expression	OP526	ZF - C2H2 - 2 fingers	No	Discontinued
158	ztf-9	WBGene00013966	ztf-9	ZK287.6	Failed ChIP-seq multiple times, discontinued	OP762	ZF - C2H2 - 3 fingers	ChIP attempted	Discontinued

[truncated: 2 more sheets: S10.Worm TFs without strains, S11.Strains from worm community]
