# Supplementary material for: Binding profiles for 961DrosophilaandC. eleganstranscription factors reveal tissue-specific regulatory relationships
Source: HighWire-hosted journal article supplement (doi:10.1101/gr.279037.124), 2024-10-22
Supplement: Supplemental_File_S2.xlsx [file Supplemental_File_S2.xlsx]

## Sheet: Supplemental_File_S2_legend
s1: Fly adult correlation values for the TF-TF pairs.
s2: Fly pupa correlation values for the TF-TF pairs.
s3: Fly larva correlation values for the TF-TF pairs.
s4: Fly embryo correlation values for the TF-TF pairs.
s5: Worm L4/yAd correlation values for the TF-TF pairs.
s6: Worm larvae correlation values for the TF-TF pairs.
s7: Worm embryo correlation values for the TF-TF pairs.

## Sheet: s1.Fly_adult
TF	CG11617	CG12768	CG14711	CG1620	CG17801	CG33017	CG7101	Clk	Crg-1	Hr96	Mnt	cic	kay	kmg	ovo	pad	tHMG1	tj	toe
CG11617	1	0.138783	0.0835775	0.0362664	-0.0689514	0.214557	0.256378	0.0461601	0.0990098	0.109555	0.0834067	0.0883411	-0.0331808	0.13406	0.00744131	0.0568786	0.184939	-0.134548	0.109265
CG12768	0.138783	1	0.10293	0.0662703	-0.00556359	0.278089	0.179595	0.174108	0.134669	0.135163	0.0894875	0.117826	0.0719146	0.100433	0.0611777	0.108413	0.230471	-0.0256108	0.115798
CG14711	0.0835775	0.10293	1	0.131622	0.0561583	0.186521	0.249269	0.0853891	0.131763	0.048219	0.0473387	-0.065049	0.0130838	0.0738413	0.0618447	0.0940539	0.161815	-0.00551753	0.111434
CG1620	0.0362664	0.0662703	0.131622	1	0.0279703	0.0288382	0.130638	0.178606	0.270487	0.0786059	0.0761526	-0.021305	-0.00824476	0.0649279	0.132271	0.126135	0.0980259	0.0155173	0.126398
CG17801	-0.0689514	-0.00556359	0.0561583	0.0279703	1	-0.00435267	-0.0234573	-0.00817055	-0.0273052	-0.0330456	-0.0591028	-0.211445	-0.0645231	-0.0469426	0.00237585	-0.0376181	-0.0125777	0.23402	-0.0331066
CG33017	0.214557	0.278089	0.186521	0.0288382	-0.00435267	1	0.285105	0.112312	0.104343	0.150665	0.0961299	0.112259	0.0454654	0.133484	0.0577211	0.0693748	0.272383	-0.0730108	0.095439
CG7101	0.256378	0.179595	0.249269	0.130638	-0.0234573	0.285105	1	0.11593	0.1749	0.110399	0.131975	0.0640511	-0.0316855	0.135015	0.0565885	0.111087	0.234898	-0.117963	0.080011
Clk	0.0461601	0.174108	0.0853891	0.178606	-0.00817055	0.112312	0.11593	1	0.0654371	0.054322	0.115899	0.0522951	0.0245641	0.0652539	0.0918063	0.111249	0.145457	-0.0216055	0.0927894
Crg-1	0.0990098	0.134669	0.131763	0.270487	-0.0273052	0.104343	0.1749	0.0654371	1	0.0717078	0.0673995	0.0508476	0.00722454	0.0220539	0.123972	0.0851616	0.119017	0.0103866	0.103491
Hr96	0.109555	0.135163	0.048219	0.0786059	-0.0330456	0.150665	0.110399	0.054322	0.0717078	1	0.058425	0.0340726	-0.0352191	0.19646	0.0211274	0.055352	0.123472	-0.0731846	0.164181
Mnt	0.0834067	0.0894875	0.0473387	0.0761526	-0.0591028	0.0961299	0.131975	0.115899	0.0673995	0.058425	1	0.150628	-0.0140993	0.0126305	0.0617959	0.0759341	0.0560691	-0.0795199	0.0121307
cic	0.0883411	0.117826	-0.065049	-0.021305	-0.211445	0.112259	0.0640511	0.0522951	0.0508476	0.0340726	0.150628	1	0.10099	-0.0347763	-0.0294252	-0.0175892	0.067537	-0.171283	-0.0492835
kay	-0.0331808	0.0719146	0.0130838	-0.00824476	-0.0645231	0.0454654	-0.0316855	0.0245641	0.00722454	-0.0352191	-0.0140993	0.10099	1	-0.0274345	-0.00769379	-0.0484069	0.0141385	-0.0794358	0.00276151
kmg	0.13406	0.100433	0.0738413	0.0649279	-0.0469426	0.133484	0.135015	0.0652539	0.0220539	0.19646	0.0126305	-0.0347763	-0.0274345	1	0.00486377	0.00784736	0.19688	-0.0785601	0.200486
ovo	0.00744131	0.0611777	0.0618447	0.132271	0.00237585	0.0577211	0.0565885	0.0918063	0.123972	0.0211274	0.0617959	-0.0294252	-0.00769379	0.00486377	1	0.161071	0.0651464	-0.0227252	0.0355533
pad	0.0568786	0.108413	0.0940539	0.126135	-0.0376181	0.0693748	0.111087	0.111249	0.0851616	0.055352	0.0759341	-0.0175892	-0.0484069	0.00784736	0.161071	1	0.116142	-0.0246457	0.00939224
tHMG1	0.184939	0.230471	0.161815	0.0980259	-0.0125777	0.272383	0.234898	0.145457	0.119017	0.123472	0.0560691	0.067537	0.0141385	0.19688	0.0651464	0.116142	1	-0.05483	0.162783
tj	-0.134548	-0.0256108	-0.00551753	0.0155173	0.23402	-0.0730108	-0.117963	-0.0216055	0.0103866	-0.0731846	-0.0795199	-0.171283	-0.0794358	-0.0785601	-0.0227252	-0.0246457	-0.05483	1	-0.0859277
toe	0.109265	0.115798	0.111434	0.126398	-0.0331066	0.095439	0.080011	0.0927894	0.103491	0.164181	0.0121307	-0.0492835	0.00276151	0.200486	0.0355533	0.00939224	0.162783	-0.0859277	1

## Sheet: s2.Fly_pupa
TF	Blimp-1	CG10348	CG10631	CG10669	CG11294	CG11902	CG12605	CG13204	CG14655	CG15336	CG15710	CG1663	CG16779	CG17806	CG3032	CG31627	CG32006	CG32121	CG34367	CG3919	CG4318	CG44002	CG4496	CG6163	CG6276	CG6808	CG7368	CG7691	CG8119	CG8159	CG8301	CG8319	CG9948	CTPsyn	Coop	D1	EcR	Eip75B	Eip78C	Eip93F	Ets21C	Ets96B	Ets98B	FoxP	Gug	Hr38	Hr39	Hr4	Met
Blimp-1	1	-0.00911982	0.00532396	0.0352661	-0.0106936	0.138093	0.015055	0.0546156	-0.00320139	0.0111894	0.03477	-0.0132176	0.0554147	0.0235218	0.0314783	0.100538	-0.030845	-0.0149895	0.0488983	0.0930643	-0.0248983	0.146901	0.0307464	0.0664231	0.0348472	0.0887047	0.0857145	-0.0193006	0.0143079	0.0176868	0.0115658	0.0888078	0.0123395	0.261384	0.0651159	0.0194354	0.109052	0.14832	0.0781928	0.0399835	0.130228	0.0260286	0.0294833	0.117861	-0.0101675	0.00612072	0.0992098	-0.0244857	0.148035
CG10348	-0.00911982	1	0.0655353	0.0406838	0.276462	0.0243051	0.144259	0.0122951	0.082073	0.131272	0.0362143	0.0408424	0.08338	0.0528542	0.0409518	0.0413332	0.0938782	0.185642	0.0246492	0.0934951	0.112924	0.0437809	0.104114	0.10098	0.123911	0.00350798	0.0663447	0.0277977	0.128014	0.0197753	0.107806	0.0323418	0.0445978	-0.0110312	0.0147423	0.00639505	-0.0157931	0.0545484	0.0737148	0.00662158	0.0231042	0.0288533	0.148703	0.013544	0.209284	0.103335	0.0410773	0.11822	0.0270307
CG10631	0.00532396	0.0655353	1	0.371359	0.153616	0.194301	0.0729328	0.0713008	0.401621	0.228623	0.390211	0.462651	0.159501	0.433412	0.366562	0.269815	0.378457	0.0936015	0.297253	0.359274	0.327925	0.301521	0.104492	0.224483	0.172535	0.209569	0.212761	-0.0363412	0.256461	0.398045	0.358301	0.148066	0.464712	-0.00596883	0.153292	0.0922227	-0.0372418	0.331025	0.386367	-0.0260649	0.202125	0.412763	0.133106	0.0698805	0.221872	0.028009	0.307352	0.317644	0.308082
CG10669	0.0352661	0.0406838	0.371359	1	0.128103	0.229937	0.1372	0.176613	0.336951	0.181749	0.493766	0.454309	0.239052	0.489458	0.511086	0.251206	0.252681	0.0884193	0.480483	0.398013	0.208596	0.342968	0.130903	0.259462	0.161676	0.411538	0.321386	-0.0243549	0.221434	0.466066	0.311348	0.202321	0.480636	0.0451036	0.310921	0.128452	0.0679689	0.38541	0.430435	-0.0128307	0.183795	0.533712	0.123916	0.10965	0.2012	0.017256	0.275117	0.206967	0.301762
CG11294	-0.0106936	0.276462	0.153616	0.128103	1	0.0846897	0.25787	0.0108465	0.198496	0.29232	0.110184	0.128614	0.139195	0.178003	0.139253	0.0751063	0.219584	0.357786	0.102522	0.193242	0.237335	0.125402	0.253541	0.239869	0.248691	0.0561117	0.156275	-0.00920974	0.280181	0.102876	0.21707	0.0995124	0.165025	-0.015213	0.0596127	0.031344	-0.033025	0.1448	0.206825	-0.0140343	0.0307589	0.136052	0.365099	0.0453333	0.439251	0.103201	0.091168	0.270546	0.073726
CG11902	0.138093	0.0243051	0.194301	0.229937	0.0846897	1	0.0405393	0.0552813	0.104476	0.0871132	0.210235	0.165721	0.0860176	0.217476	0.218464	0.37153	0.114317	0.0449383	0.186136	0.262647	0.116118	0.341019	0.0658141	0.147896	0.0543719	0.151173	0.25822	-0.019185	0.1082	0.163911	0.114861	0.298708	0.221551	0.0657108	0.13043	0.0429106	0.0316854	0.263802	0.314778	0.0336144	0.350644	0.211246	0.0687624	0.113124	0.0985442	0.0367137	0.355081	0.118092	0.263607
CG12605	0.015055	0.144259	0.0729328	0.1372	0.25787	0.0405393	1	0.0999715	0.140097	0.300043	0.134944	0.0990839	0.213237	0.151188	0.157423	0.0326452	0.101677	0.288311	0.177227	0.173669	0.113099	0.0929836	0.296779	0.292434	0.255402	0.166233	0.176342	0.00521285	0.316753	0.0849476	0.186193	0.0808779	0.122053	0.0724757	0.137862	0.0522097	0.0334537	0.146554	0.135545	-0.00390388	0.02851	0.145874	0.385388	0.0763629	0.295018	0.0704239	0.036329	0.131571	0.051938
CG13204	0.0546156	0.0122951	0.0713008	0.176613	0.0108465	0.0552813	0.0999715	1	0.102595	0.025433	0.192658	0.152972	0.191342	0.139488	0.171366	0.0500749	0.030486	0.0116249	0.212649	0.171885	0.0241585	0.107659	0.0968562	0.152193	0.0819307	0.266543	0.142607	-0.0167303	0.0639943	0.146135	0.0781064	0.0807492	0.147805	0.157114	0.290665	0.057632	0.228022	0.18264	0.123665	-0.0217988	0.0463866	0.173855	0.0402232	0.0754379	0.0536345	0.0137829	0.0488495	0.00478967	0.0758923
CG14655	-0.00320139	0.082073	0.401621	0.336951	0.198496	0.104476	0.140097	0.102595	1	0.319456	0.321985	0.409644	0.213176	0.394408	0.321388	0.132908	0.494408	0.173122	0.284805	0.366749	0.403147	0.201847	0.184833	0.232633	0.347477	0.238591	0.175217	-0.0282874	0.360716	0.336187	0.57567	0.1067	0.433677	-0.00853486	0.148508	0.0682676	-0.0351621	0.270871	0.337445	-0.0305659	0.099922	0.368882	0.242408	0.0448236	0.289618	0.0384213	0.153815	0.369981	0.187262
CG15336	0.0111894	0.131272	0.228623	0.181749	0.29232	0.0871132	0.300043	0.025433	0.319456	1	0.20498	0.200835	0.187968	0.250847	0.196058	0.116475	0.384612	0.389327	0.186576	0.266946	0.368982	0.180985	0.316102	0.322372	0.38371	0.121419	0.165414	-0.006257	0.555759	0.139684	0.413766	0.110174	0.258256	0.0229792	0.106473	0.041792	-0.0335765	0.19657	0.245935	-0.0186843	0.0724251	0.205892	0.45909	0.0683374	0.359451	0.0511289	0.119455	0.424947	0.107558
CG15710	0.03477	0.0362143	0.390211	0.493766	0.110184	0.210235	0.134944	0.192658	0.321985	0.20498	1	0.57705	0.224691	0.527506	0.528862	0.267506	0.270126	0.0790202	0.436384	0.349007	0.222298	0.335199	0.12786	0.255014	0.144644	0.366111	0.26245	-0.033573	0.248789	0.513895	0.307171	0.178088	0.522394	0.0639122	0.309018	0.114838	0.0850746	0.36442	0.37978	-0.0143764	0.190986	0.568832	0.129363	0.0943064	0.176187	0.00651208	0.276888	0.19453	0.300598
CG1663	-0.0132176	0.0408424	0.462651	0.454309	0.128614	0.165721	0.0990839	0.152972	0.409644	0.200835	0.57705	1	0.206078	0.501804	0.452726	0.244831	0.373073	0.0568565	0.370121	0.352957	0.278474	0.298244	0.0837715	0.229403	0.14668	0.295181	0.218519	-0.0266066	0.23574	0.572329	0.343391	0.132226	0.549641	0.0136995	0.237639	0.0825652	-0.00575386	0.335641	0.375269	-0.0443493	0.1651	0.566332	0.112984	0.0614215	0.177177	0.00663118	0.26996	0.251284	0.290759
CG16779	0.0554147	0.08338	0.159501	0.239052	0.139195	0.0860176	0.213237	0.191342	0.213176	0.187968	0.224691	0.206078	1	0.213251	0.221836	0.0890801	0.147719	0.14076	0.252992	0.2357	0.141115	0.18676	0.173242	0.212834	0.236451	0.26867	0.208717	-0.0215154	0.218125	0.189218	0.213966	0.125778	0.211963	0.105358	0.203348	0.0638083	0.0832805	0.230732	0.20638	0.0357495	0.0558858	0.240122	0.179987	0.110362	0.18237	0.0322237	0.0914295	0.128479	0.134854
CG17806	0.0235218	0.0528542	0.433412	0.489458	0.178003	0.217476	0.151188	0.139488	0.394408	0.250847	0.527506	0.501804	0.213251	1	0.544745	0.270644	0.298971	0.128435	0.391705	0.395472	0.260431	0.317835	0.143329	0.284666	0.190403	0.343623	0.255034	-0.0294326	0.28153	0.475315	0.393443	0.166597	0.597635	0.0645689	0.258104	0.139473	0.0680419	0.367575	0.435007	-0.0147436	0.189484	0.557614	0.167601	0.111052	0.243984	0.018136	0.280757	0.257208	0.297744
CG3032	0.0314783	0.0409518	0.366562	0.511086	0.139253	0.218464	0.157423	0.171366	0.321388	0.196058	0.528862	0.452726	0.221836	0.544745	1	0.247969	0.233065	0.0986779	0.455106	0.358685	0.21943	0.339157	0.136971	0.238744	0.1487	0.387547	0.277747	-0.0105056	0.235158	0.443392	0.320003	0.189015	0.523503	0.0503575	0.300994	0.174152	0.0909904	0.366394	0.400403	-0.0187838	0.180137	0.53857	0.129075	0.105478	0.212832	0.0206267	0.252162	0.201541	0.279853
CG31627	0.100538	0.0413332	0.269815	0.251206	0.0751063	0.37153	0.0326452	0.0500749	0.132908	0.116475	0.267506	0.244831	0.0890801	0.270644	0.247969	1	0.146272	0.0429139	0.214366	0.281645	0.153348	0.378403	0.0571037	0.156491	0.0500012	0.139042	0.220706	-0.0203787	0.120339	0.22591	0.137651	0.230223	0.26351	0.0697373	0.139406	0.0595088	-0.0182952	0.321973	0.388178	0.00708097	0.473854	0.251983	0.0791731	0.0971984	0.107548	0.0176324	0.61477	0.173056	0.460189
CG32006	-0.030845	0.0938782	0.378457	0.252681	0.219584	0.114317	0.101677	0.030486	0.494408	0.384612	0.270126	0.373073	0.147719	0.298971	0.233065	0.146272	1	0.189601	0.211822	0.308792	0.496225	0.209641	0.179104	0.211719	0.315016	0.134114	0.153435	-0.0267409	0.399786	0.26725	0.512727	0.0930406	0.347607	-0.0456247	0.0783716	0.0236749	-0.107795	0.241471	0.307014	-0.0447647	0.100267	0.289727	0.250962	0.0154642	0.272116	0.037524	0.173929	0.48534	0.180255
CG32121	-0.0149895	0.185642	0.0936015	0.0884193	0.357786	0.0449383	0.288311	0.0116249	0.173122	0.389327	0.0790202	0.0568565	0.14076	0.128435	0.0986779	0.0429139	0.189601	1	0.0846966	0.155958	0.214832	0.0922549	0.323711	0.268958	0.311728	0.0569107	0.134297	-0.0162364	0.37184	0.0320732	0.236852	0.075156	0.111327	0.0078359	0.0505385	0.0133761	-0.0306733	0.119995	0.138886	-0.0100857	0.0298305	0.0880616	0.457861	0.043405	0.350863	0.0631413	0.0389407	0.262715	0.0457047
CG34367	0.0488983	0.0246492	0.297253	0.480483	0.102522	0.186136	0.177227	0.212649	0.284805	0.186576	0.436384	0.370121	0.252992	0.391705	0.455106	0.214366	0.211822	0.0846966	1	0.325744	0.191138	0.328765	0.142548	0.24473	0.152197	0.411504	0.291981	-0.0123537	0.24784	0.356873	0.270015	0.222035	0.405719	0.0604195	0.358315	0.141253	0.104909	0.347713	0.345577	-0.00935743	0.165338	0.440159	0.131783	0.115327	0.181264	0.0182743	0.215254	0.180531	0.244617
CG3919	0.0930643	0.0934951	0.359274	0.398013	0.193242	0.262647	0.173669	0.171885	0.366749	0.266946	0.349007	0.352957	0.2357	0.395472	0.358685	0.281645	0.308792	0.155958	0.325744	1	0.278947	0.3644	0.204439	0.30312	0.245675	0.291754	0.326077	-0.0229628	0.288043	0.336928	0.352294	0.217693	0.388857	0.0913107	0.250004	0.088718	0.050602	0.40482	0.467746	-0.00395185	0.225976	0.380929	0.229215	0.122376	0.258917	0.0402055	0.295786	0.278061	0.327392
CG4318	-0.0248983	0.112924	0.327925	0.208596	0.237335	0.116118	0.113099	0.0241585	0.403147	0.368982	0.222298	0.278474	0.141115	0.260431	0.21943	0.153348	0.496225	0.214832	0.191138	0.278947	1	0.196336	0.17276	0.192834	0.297116	0.0953768	0.150156	-0.0135702	0.386491	0.200435	0.414008	0.104626	0.307356	-0.0448238	0.0659669	0.0470599	-0.0820726	0.204345	0.285572	-0.0365361	0.119134	0.242278	0.261405	0.0310585	0.301881	0.0359727	0.17127	0.482379	0.162781
CG44002	0.146901	0.0437809	0.301521	0.342968	0.125402	0.341019	0.0929836	0.107659	0.201847	0.180985	0.335199	0.298244	0.18676	0.317835	0.339157	0.378403	0.209641	0.0922549	0.328765	0.3644	0.196336	1	0.104737	0.209308	0.134963	0.254046	0.335138	-0.0217546	0.219645	0.288301	0.197858	0.284458	0.315138	0.118782	0.211484	0.100266	0.0468171	0.366728	0.422842	0.0204948	0.31511	0.326163	0.112282	0.152448	0.15331	0.0232526	0.374324	0.197017	0.407716
CG4496	0.0307464	0.104114	0.104492	0.130903	0.253541	0.0658141	0.296779	0.0968562	0.184833	0.316102	0.12786	0.0837715	0.173242	0.143329	0.136971	0.0571037	0.179104	0.323711	0.142548	0.204439	0.17276	0.104737	1	0.30895	0.255375	0.128208	0.145584	-0.00783609	0.313133	0.0679631	0.223129	0.0653875	0.136588	0.0676707	0.153046	0.0333374	0.0251574	0.155031	0.160995	-0.0299716	0.0289746	0.126326	0.397053	0.0475807	0.284831	0.0445576	0.0570718	0.197156	0.0508142
CG6163	0.0664231	0.10098	0.224483	0.259462	0.239869	0.147896	0.292434	0.152193	0.232633	0.322372	0.255014	0.229403	0.212834	0.284666	0.238744	0.156491	0.211719	0.268958	0.24473	0.30312	0.192834	0.209308	0.30895	1	0.248312	0.207933	0.213814	-0.0208307	0.334159	0.203072	0.257883	0.142304	0.250204	0.108386	0.208803	0.0373037	0.0596904	0.267132	0.293302	-0.00238352	0.113266	0.263285	0.359928	0.104653	0.298426	0.0450845	0.17062	0.221616	0.169319
CG6276	0.0348472	0.123911	0.172535	0.161676	0.248691	0.0543719	0.255402	0.0819307	0.347477	0.38371	0.144644	0.14668	0.236451	0.190403	0.1487	0.0500012	0.315016	0.311728	0.152197	0.245675	0.297116	0.134963	0.255375	0.248312	1	0.165562	0.154554	-0.0136782	0.38729	0.115709	0.388458	0.0819984	0.190263	0.0413955	0.104955	0.0415189	0.0135281	0.178156	0.211435	-0.0147167	0.0418455	0.172848	0.360486	0.0658464	0.295908	0.060302	0.0584181	0.315977	0.0823837
CG6808	0.0887047	0.00350798	0.209569	0.411538	0.0561117	0.151173	0.166233	0.266543	0.238591	0.121419	0.366111	0.295181	0.26867	0.343623	0.387547	0.139042	0.134114	0.0569107	0.411504	0.291754	0.0953768	0.254046	0.128208	0.207933	0.165562	1	0.25084	-0.0141835	0.165491	0.323581	0.213237	0.173413	0.321694	0.160902	0.359988	0.153485	0.178149	0.31836	0.265289	0.00880278	0.101472	0.370468	0.107282	0.120989	0.111452	0.0198274	0.133685	0.0863266	0.182813
CG7368	0.0857145	0.0663447	0.212761	0.321386	0.156275	0.25822	0.176342	0.142607	0.175217	0.165414	0.26245	0.218519	0.208717	0.255034	0.277747	0.220706	0.153435	0.134297	0.291981	0.326077	0.150156	0.335138	0.145584	0.213814	0.154554	0.25084	1	-0.0168786	0.188093	0.226608	0.193251	0.301581	0.246421	0.085037	0.214223	0.0867677	0.0613611	0.290725	0.311873	0.0156351	0.184182	0.278997	0.16122	0.138936	0.185322	0.068074	0.234735	0.17372	0.234813
CG7691	-0.0193006	0.0277977	-0.0363412	-0.0243549	-0.00920974	-0.019185	0.00521285	-0.0167303	-0.0282874	-0.006257	-0.033573	-0.0266066	-0.0215154	-0.0294326	-0.0105056	-0.0203787	-0.0267409	-0.0162364	-0.0123537	-0.0229628	-0.0135702	-0.0217546	-0.00783609	-0.0208307	-0.0136782	-0.0141835	-0.0168786	1	-0.0132295	-0.0438764	-0.0222459	-0.0124491	-0.0315076	0.000331659	0.00729148	0.00420679	-0.00221099	-0.0177168	-0.0151976	-0.00743812	-0.0195979	-0.0233263	-0.00348289	0.00353313	-0.0183674	-0.00364539	-0.0252217	-0.0236842	-0.0156702
CG8119	0.0143079	0.128014	0.256461	0.221434	0.280181	0.1082	0.316753	0.0639943	0.360716	0.555759	0.248789	0.23574	0.218125	0.28153	0.235158	0.120339	0.399786	0.37184	0.24784	0.288043	0.386491	0.219645	0.313133	0.334159	0.38729	0.165491	0.188093	-0.0132295	1	0.17567	0.423899	0.119087	0.2981	0.0174072	0.131273	0.052232	-0.0247145	0.223884	0.273228	-0.0203543	0.0788225	0.247222	0.445531	0.0746311	0.364741	0.0477994	0.12523	0.418572	0.129409
CG8159	0.0176868	0.0197753	0.398045	0.466066	0.102876	0.163911	0.0849476	0.146135	0.336187	0.139684	0.513895	0.572329	0.189218	0.475315	0.443392	0.22591	0.26725	0.0320732	0.356873	0.336928	0.200435	0.288301	0.0679631	0.203072	0.115709	0.323581	0.226608	-0.0438764	0.17567	1	0.269562	0.138456	0.473369	0.0439374	0.232912	0.09103	0.0124344	0.325249	0.341128	-0.0279463	0.149783	0.531752	0.0832228	0.0724566	0.156332	0.015204	0.244692	0.176291	0.268392
CG8301	0.0115658	0.107806	0.358301	0.311348	0.21707	0.114861	0.186193	0.0781064	0.57567	0.413766	0.307171	0.343391	0.213966	0.393443	0.320003	0.137651	0.512727	0.236852	0.270015	0.352294	0.414008	0.197858	0.223129	0.257883	0.388458	0.213237	0.193251	-0.0222459	0.423899	0.269562	1	0.107865	0.409215	0.00864147	0.139356	0.0743352	-0.0111375	0.274397	0.341339	-0.0306867	0.101755	0.354502	0.303522	0.0571687	0.293383	0.0338751	0.158847	0.424642	0.186128
CG8319	0.0888078	0.0323418	0.148066	0.202321	0.0995124	0.298708	0.0808779	0.0807492	0.1067	0.110174	0.178088	0.132226	0.125778	0.166597	0.189015	0.230223	0.0930406	0.075156	0.222035	0.217693	0.104626	0.284458	0.0653875	0.142304	0.0819984	0.173413	0.301581	-0.0124491	0.119087	0.138456	0.107865	1	0.170902	0.061961	0.158143	0.0669145	0.0478465	0.221526	0.221276	0.0205115	0.231074	0.170973	0.0892501	0.123458	0.1338	0.0273355	0.215492	0.0946306	0.18636
CG9948	0.0123395	0.0445978	0.464712	0.480636	0.165025	0.221551	0.122053	0.147805	0.433677	0.258256	0.522394	0.549641	0.211963	0.597635	0.523503	0.26351	0.347607	0.111327	0.405719	0.388857	0.307356	0.315138	0.136588	0.250204	0.190263	0.321694	0.246421	-0.0315076	0.2981	0.473369	0.409215	0.170902	1	0.0244556	0.244443	0.125919	0.0375668	0.368988	0.42321	-0.0270313	0.185972	0.547696	0.152826	0.0928638	0.238482	0.0209979	0.275006	0.294254	0.293875
CTPsyn	0.261384	-0.0110312	-0.00596883	0.0451036	-0.015213	0.0657108	0.0724757	0.157114	-0.00853486	0.0229792	0.0639122	0.0136995	0.105358	0.0645689	0.0503575	0.0697373	-0.0456247	0.0078359	0.0604195	0.0913107	-0.0448238	0.118782	0.0676707	0.108386	0.0413955	0.160902	0.085037	0.000331659	0.0174072	0.0439374	0.00864147	0.061961	0.0244556	1	0.156897	0.0361776	0.171028	0.149708	0.0766117	0.0611731	0.0835232	0.052343	0.0404549	0.132061	-0.00796686	0.00631845	0.0609552	-0.0447931	0.128207
Coop	0.0651159	0.0147423	0.153292	0.310921	0.0596127	0.13043	0.137862	0.290665	0.148508	0.106473	0.309018	0.237639	0.203348	0.258104	0.300994	0.139406	0.0783716	0.0505385	0.358315	0.250004	0.0659669	0.211484	0.153046	0.208803	0.104955	0.359988	0.214223	0.00729148	0.131273	0.232912	0.139356	0.158143	0.244443	0.156897	1	0.0899325	0.215286	0.285853	0.231634	-0.00331226	0.0999189	0.303148	0.101471	0.102548	0.103266	0.0240032	0.136927	0.0665373	0.152163
D1	0.0194354	0.00639505	0.0922227	0.128452	0.031344	0.0429106	0.0522097	0.057632	0.0682676	0.041792	0.114838	0.0825652	0.0638083	0.139473	0.174152	0.0595088	0.0236749	0.0133761	0.141253	0.088718	0.0470599	0.100266	0.0333374	0.0373037	0.0415189	0.153485	0.0867677	0.00420679	0.052232	0.09103	0.0743352	0.0669145	0.125919	0.0361776	0.0899325	1	0.0575993	0.111043	0.0982131	0.00835571	0.0401573	0.128491	0.0238205	0.0680631	0.0434801	0.00847131	0.0515776	0.0342342	0.0800837
EcR	0.109052	-0.0157931	-0.0372418	0.0679689	-0.033025	0.0316854	0.0334537	0.228022	-0.0351621	-0.0335765	0.0850746	-0.00575386	0.0832805	0.0680419	0.0909904	-0.0182952	-0.107795	-0.0306733	0.104909	0.050602	-0.0820726	0.0468171	0.0251574	0.0596904	0.0135281	0.178149	0.0613611	-0.00221099	-0.0247145	0.0124344	-0.0111375	0.0478465	0.0375668	0.171028	0.215286	0.0575993	1	0.132814	0.0408166	0.0385016	-0.0101148	0.0674641	-0.0156314	0.0832593	-0.0181493	-0.00673927	-0.0303191	-0.0850944	0.0225006
Eip75B	0.14832	0.0545484	0.331025	0.38541	0.1448	0.263802	0.146554	0.18264	0.270871	0.19657	0.36442	0.335641	0.230732	0.367575	0.366394	0.321973	0.241471	0.119995	0.347713	0.40482	0.204345	0.366728	0.155031	0.267132	0.178156	0.31836	0.290725	-0.0177168	0.223884	0.325249	0.274397	0.221526	0.368988	0.149708	0.285853	0.111043	0.132814	1	0.465706	0.0155673	0.248201	0.382128	0.160161	0.159679	0.197263	0.0294062	0.317338	0.226543	0.360956
Eip78C	0.0781928	0.0737148	0.386367	0.430435	0.206825	0.314778	0.135545	0.123665	0.337445	0.245935	0.37978	0.375269	0.20638	0.435007	0.400403	0.388178	0.307014	0.138886	0.345577	0.467746	0.285572	0.422842	0.160995	0.293302	0.211435	0.265289	0.311873	-0.0151976	0.273228	0.341128	0.341339	0.221276	0.42321	0.0766117	0.231634	0.0982131	0.0408166	0.465706	1	0.00289467	0.306078	0.405767	0.204085	0.140661	0.270436	0.045218	0.408742	0.335665	0.418296
Eip93F	0.0399835	0.00662158	-0.0260649	-0.0128307	-0.0140343	0.0336144	-0.00390388	-0.0217988	-0.0305659	-0.0186843	-0.0143764	-0.0443493	0.0357495	-0.0147436	-0.0187838	0.00708097	-0.0447647	-0.0100857	-0.00935743	-0.00395185	-0.0365361	0.0204948	-0.0299716	-0.00238352	-0.0147167	0.00880278	0.0156351	-0.00743812	-0.0203543	-0.0279463	-0.0306867	0.0205115	-0.0270313	0.0611731	-0.00331226	0.00835571	0.0385016	0.0155673	0.00289467	1	0.0244026	-0.0182429	-0.0116838	0.0431515	-0.0160614	-0.00343207	-0.00436787	-0.0371284	0.0385929
Ets21C	0.130228	0.0231042	0.202125	0.183795	0.0307589	0.350644	0.02851	0.0463866	0.099922	0.0724251	0.190986	0.1651	0.0558858	0.189484	0.180137	0.473854	0.100267	0.0298305	0.165338	0.225976	0.119134	0.31511	0.0289746	0.113266	0.0418455	0.101472	0.184182	-0.0195979	0.0788225	0.149783	0.101755	0.231074	0.185972	0.0835232	0.0999189	0.0401573	-0.0101148	0.248201	0.306078	0.0244026	1	0.179461	0.0418648	0.0915301	0.0747108	0.0221115	0.456572	0.108122	0.350423
Ets96B	0.0260286	0.0288533	0.412763	0.533712	0.136052	0.211246	0.145874	0.173855	0.368882	0.205892	0.568832	0.566332	0.240122	0.557614	0.53857	0.251983	0.289727	0.0880616	0.440159	0.380929	0.242278	0.326163	0.126326	0.263285	0.172848	0.370468	0.278997	-0.0233263	0.247222	0.531752	0.354502	0.170973	0.547696	0.052343	0.303148	0.128491	0.0674641	0.382128	0.405767	-0.0182429	0.179461	1	0.131453	0.0926667	0.204464	0.00873781	0.260791	0.223499	0.288968
Ets98B	0.0294833	0.148703	0.133106	0.123916	0.365099	0.0687624	0.385388	0.0402232	0.242408	0.45909	0.129363	0.112984	0.179987	0.167601	0.129075	0.0791731	0.250962	0.457861	0.131783	0.229215	0.261405	0.112282	0.397053	0.359928	0.360486	0.107282	0.16122	-0.00348289	0.445531	0.0832228	0.303522	0.0892501	0.152826	0.0404549	0.101471	0.0238205	-0.0156314	0.160161	0.204085	-0.0116838	0.0418648	0.131453	1	0.0640716	0.390667	0.0614773	0.0843427	0.3077	0.0768672
FoxP	0.117861	0.013544	0.0698805	0.10965	0.0453333	0.113124	0.0763629	0.0754379	0.0448236	0.0683374	0.0943064	0.0614215	0.110362	0.111052	0.105478	0.0971984	0.0154642	0.043405	0.115327	0.122376	0.0310585	0.152448	0.0475807	0.104653	0.0658464	0.120989	0.138936	0.00353313	0.0746311	0.0724566	0.0571687	0.123458	0.0928638	0.132061	0.102548	0.0680631	0.0832593	0.159679	0.140661	0.0431515	0.0915301	0.0926667	0.0640716	1	0.0661033	0.0239417	0.0901425	0.0390835	0.130999
Gug	-0.0101675	0.209284	0.221872	0.2012	0.439251	0.0985442	0.295018	0.0536345	0.289618	0.359451	0.176187	0.177177	0.18237	0.243984	0.212832	0.107548	0.272116	0.350863	0.181264	0.258917	0.301881	0.15331	0.284831	0.298426	0.295908	0.111452	0.185322	-0.0183674	0.364741	0.156332	0.293383	0.1338	0.238482	-0.00796686	0.103266	0.0434801	-0.0181493	0.197263	0.270436	-0.0160614	0.0747108	0.204464	0.390667	0.0661033	1	0.0885149	0.120192	0.328124	0.117742
Hr38	0.00612072	0.103335	0.028009	0.017256	0.103201	0.0367137	0.0704239	0.0137829	0.0384213	0.0511289	0.00651208	0.00663118	0.0322237	0.018136	0.0206267	0.0176324	0.037524	0.0631413	0.0182743	0.0402055	0.0359727	0.0232526	0.0445576	0.0450845	0.060302	0.0198274	0.068074	-0.00364539	0.0477994	0.015204	0.0338751	0.0273355	0.0209979	0.00631845	0.0240032	0.00847131	-0.00673927	0.0294062	0.045218	-0.00343207	0.0221115	0.00873781	0.0614773	0.0239417	0.0885149	1	0.0222091	0.0432785	0.0262199
Hr39	0.0992098	0.0410773	0.307352	0.275117	0.091168	0.355081	0.036329	0.0488495	0.153815	0.119455	0.276888	0.26996	0.0914295	0.280757	0.252162	0.61477	0.173929	0.0389407	0.215254	0.295786	0.17127	0.374324	0.0570718	0.17062	0.0584181	0.133685	0.234735	-0.0252217	0.12523	0.244692	0.158847	0.215492	0.275006	0.0609552	0.136927	0.0515776	-0.0303191	0.317338	0.408742	-0.00436787	0.456572	0.260791	0.0843427	0.0901425	0.120192	0.0222091	1	0.194768	0.483985
Hr4	-0.0244857	0.11822	0.317644	0.206967	0.270546	0.118092	0.131571	0.00478967	0.369981	0.424947	0.19453	0.251284	0.128479	0.257208	0.201541	0.173056	0.48534	0.262715	0.180531	0.278061	0.482379	0.197017	0.197156	0.221616	0.315977	0.0863266	0.17372	-0.0236842	0.418572	0.176291	0.424642	0.0946306	0.294254	-0.0447931	0.0665373	0.0342342	-0.0850944	0.226543	0.335665	-0.0371284	0.108122	0.223499	0.3077	0.0390835	0.328124	0.0432785	0.194768	1	0.185769
Met	0.148035	0.0270307	0.308082	0.301762	0.073726	0.263607	0.051938	0.0758923	0.187262	0.107558	0.300598	0.290759	0.134854	0.297744	0.279853	0.460189	0.180255	0.0457047	0.244617	0.327392	0.162781	0.407716	0.0508142	0.169319	0.0823837	0.182813	0.234813	-0.0156702	0.129409	0.268392	0.186128	0.18636	0.293875	0.128207	0.152163	0.0800837	0.0225006	0.360956	0.418296	0.0385929	0.350423	0.288968	0.0768672	0.130999	0.117742	0.0262199	0.483985	0.185769	1
OdsH	0.0495252	0.127526	0.435863	0.392643	0.264581	0.293851	0.153665	0.0820682	0.382175	0.33349	0.387718	0.400481	0.200137	0.420402	0.379276	0.36616	0.39158	0.208803	0.35123	0.441973	0.408404	0.434131	0.183378	0.292032	0.254674	0.228905	0.292174	-0.0196517	0.359483	0.331259	0.380733	0.227158	0.431297	0.0177067	0.185422	0.103251	-0.011256	0.397614	0.490908	-0.00400435	0.280259	0.405515	0.243453	0.105659	0.320451	0.0497786	0.379391	0.426611	0.377285
Plzf	0.140206	0.0577625	0.33441	0.362874	0.138934	0.390182	0.101801	0.12754	0.217593	0.185523	0.344874	0.315285	0.178579	0.342507	0.349521	0.453403	0.222057	0.0906232	0.360826	0.396169	0.214373	0.489054	0.110092	0.228978	0.11983	0.260275	0.343931	-0.017679	0.216256	0.285927	0.230068	0.298743	0.343663	0.102637	0.242714	0.0895125	0.0454638	0.416206	0.458863	0.0150949	0.390612	0.348345	0.135337	0.145715	0.163606	0.0530024	0.42832	0.215888	0.400918
Smox	0.0824029	0.0258815	0.310832	0.271081	0.0556857	0.223472	0.00626576	0.0422889	0.175437	0.0873161	0.283915	0.320293	0.092682	0.263965	0.253454	0.415312	0.193365	0.0117723	0.197211	0.276534	0.170476	0.353303	0.0126151	0.131635	0.0489227	0.141154	0.187767	-0.0255828	0.112024	0.284982	0.149825	0.150528	0.266595	0.0708327	0.0978537	0.0635704	-0.0561821	0.283197	0.341684	0.0104394	0.310439	0.279026	0.0351493	0.101298	0.0907676	0.0135537	0.435347	0.170805	0.493064
Snoo	0.263135	0.00880046	0.144975	0.185033	0.037878	0.26762	0.0851302	0.112658	0.0901508	0.0805187	0.20974	0.146715	0.132421	0.201113	0.205433	0.281687	0.0669918	0.0519323	0.188128	0.221098	0.0498944	0.322947	0.066827	0.158285	0.0763579	0.218787	0.208517	-0.0123272	0.0958482	0.163668	0.10454	0.188634	0.170434	0.256515	0.168483	0.0721339	0.0986088	0.296296	0.253208	0.0565231	0.262153	0.19744	0.0739722	0.151358	0.0536562	0.0182916	0.259791	0.0440734	0.305675
Sox102F	0.185394	0.0211803	0.232112	0.230342	0.0490989	0.20876	0.045021	0.103254	0.125559	0.0701181	0.236102	0.240627	0.129202	0.213811	0.201297	0.352449	0.107565	0.0131756	0.180064	0.268513	0.100636	0.32991	0.0497418	0.159198	0.0561053	0.171654	0.191502	-0.0189087	0.0907517	0.223908	0.111916	0.150449	0.196324	0.199096	0.158199	0.0643458	0.048589	0.305703	0.305732	0.0410607	0.27918	0.224825	0.0555034	0.143977	0.0688538	0.0237257	0.373816	0.0993324	0.451921
Sox14	0.0782117	0.0942339	0.26629	0.29266	0.173068	0.252238	0.142445	0.106192	0.232986	0.195577	0.284281	0.247852	0.18413	0.304641	0.291634	0.34585	0.191271	0.116709	0.304043	0.332952	0.196627	0.312394	0.127528	0.225476	0.161281	0.222515	0.250007	0.00373949	0.206489	0.215368	0.241607	0.211403	0.306699	0.0871515	0.225909	0.0853608	0.0995122	0.370528	0.402608	0.0652366	0.286005	0.29033	0.166554	0.110075	0.229621	0.0360121	0.350937	0.218841	0.327094
Sox15	0.101919	0.0284079	0.18704	0.209724	0.0716061	0.444792	0.0328241	0.0583045	0.10288	0.0949229	0.197541	0.162601	0.0945368	0.187259	0.206493	0.348449	0.118434	0.0440149	0.214187	0.229652	0.14246	0.335372	0.0557198	0.127737	0.0639319	0.131461	0.243996	-0.0164847	0.112381	0.15625	0.106418	0.284183	0.200243	0.0551149	0.128543	0.0515627	0.0328981	0.224541	0.290762	0.0258321	0.342644	0.201373	0.0589607	0.113315	0.099813	0.0117304	0.318034	0.137052	0.238458
achi	0.0687438	0.108394	0.408456	0.388377	0.228462	0.239575	0.169159	0.103878	0.384678	0.311553	0.370416	0.400902	0.224805	0.403705	0.370523	0.301256	0.367915	0.171564	0.352894	0.449032	0.356369	0.393316	0.189116	0.283121	0.254966	0.251302	0.292027	-0.00395784	0.357805	0.336883	0.397228	0.207768	0.421387	0.0422336	0.204398	0.101596	0.0063026	0.375428	0.451469	-0.0154632	0.227136	0.391334	0.231434	0.102913	0.28266	0.0464889	0.30462	0.348765	0.338476
acj6	0.0619259	0.0887465	0.439266	0.417657	0.221207	0.314526	0.114936	0.113555	0.344661	0.260689	0.401657	0.410562	0.188006	0.424976	0.404466	0.405232	0.341329	0.144343	0.377005	0.426817	0.344211	0.445296	0.150978	0.252477	0.193666	0.242941	0.293092	-0.0262135	0.30224	0.353227	0.33141	0.223185	0.460319	0.0328685	0.204108	0.111807	0.00854454	0.401193	0.483695	-0.00501901	0.318916	0.419009	0.182657	0.102241	0.271404	0.050583	0.415185	0.344546	0.404718
cyc	0.109428	0.046812	0.267394	0.291102	0.0990374	0.416308	0.0448074	0.0466615	0.162315	0.121033	0.266823	0.240795	0.0890724	0.28757	0.263274	0.570359	0.14297	0.0619585	0.231919	0.327414	0.153414	0.372458	0.066336	0.173513	0.0646877	0.156651	0.261306	-0.0203341	0.132088	0.231276	0.165652	0.257244	0.280509	0.0788786	0.132659	0.0647139	-0.00267133	0.323573	0.415555	0.0134867	0.460666	0.278438	0.0935058	0.111448	0.144382	0.0195426	0.546183	0.175172	0.441007
dac	0.00582162	0.21957	0.160434	0.113118	0.289141	0.0635685	0.179104	0.0332981	0.230526	0.268316	0.1042	0.11423	0.153541	0.14688	0.125991	0.0713738	0.237742	0.245355	0.11354	0.222296	0.286562	0.132756	0.178848	0.162359	0.267122	0.0677224	0.137992	-0.00845967	0.280876	0.0923263	0.261382	0.101121	0.156845	-0.00851892	0.0630519	0.0390187	-0.0111207	0.155415	0.192996	-0.0105582	0.0690243	0.110577	0.259888	0.0479115	0.318628	0.118196	0.0782836	0.287669	0.0840964
dsx	0.0681037	0.009748	0.193704	0.287556	0.0400568	0.119732	0.0931416	0.253933	0.176949	0.0864658	0.324411	0.274206	0.196879	0.291608	0.318167	0.113092	0.0907387	0.0269823	0.292103	0.239538	0.0802111	0.193144	0.101311	0.179986	0.1051	0.312751	0.165267	-0.00552836	0.114016	0.280263	0.169028	0.112397	0.282648	0.140452	0.29365	0.125232	0.223951	0.266073	0.241629	-0.0195068	0.0792852	0.327237	0.0645645	0.0921363	0.0868278	0.0123673	0.112557	0.0649338	0.165509
eg	0.0145623	0.132543	0.152915	0.142284	0.284782	0.0585074	0.312517	0.0548364	0.245674	0.44271	0.132869	0.126099	0.1932	0.174904	0.134186	0.0750782	0.274997	0.39243	0.142932	0.227081	0.257201	0.12367	0.372832	0.349842	0.345096	0.107583	0.160429	-0.0213786	0.445018	0.0964086	0.296491	0.0725535	0.159084	0.0315047	0.0966771	0.00603094	-0.0335971	0.156959	0.1891	-0.0288621	0.0394342	0.153681	0.477455	0.0603564	0.339941	0.0472449	0.0826702	0.295389	0.0709104
fd59A	0.0343739	0.0455288	0.299935	0.421674	0.119711	0.238256	0.102571	0.186323	0.258975	0.141437	0.373203	0.327804	0.203474	0.353817	0.417767	0.244923	0.21284	0.0659481	0.474161	0.310452	0.214749	0.310728	0.103347	0.188226	0.11196	0.347546	0.276886	-0.0133619	0.190411	0.299642	0.23707	0.232725	0.390459	0.0453199	0.304707	0.151564	0.0943191	0.328326	0.350656	-0.0142882	0.200906	0.382374	0.0937169	0.091925	0.181418	0.0259506	0.23966	0.178724	0.238703
fd96Ca	0.0068629	0.157052	0.131914	0.156374	0.302273	0.0737828	0.280064	0.0953698	0.218705	0.329849	0.126811	0.130854	0.182014	0.163776	0.159501	0.0672321	0.225272	0.334413	0.143348	0.209811	0.199009	0.11585	0.339535	0.322822	0.280713	0.133545	0.158519	-0.0117207	0.327982	0.100969	0.237332	0.110219	0.163374	0.0361645	0.124668	0.0118259	0.0075463	0.159896	0.182989	-0.00873526	0.0448687	0.157355	0.416676	0.0641797	0.322349	0.0588722	0.0809499	0.229381	0.075688
fkh	-0.0171743	-0.0185269	-0.113277	-0.0795252	-0.0424752	-0.044426	-0.042516	-0.0729061	-0.110512	-0.0763409	-0.106376	-0.137855	-0.0281324	-0.103731	-0.0870169	-0.0631518	-0.121737	-0.0362604	-0.0561916	-0.0839835	-0.0864334	-0.0492377	-0.0526013	-0.064128	-0.0492967	-0.0451704	-0.0360461	0.00905062	-0.0884	-0.131061	-0.0916169	-0.0308213	-0.10387	-0.00108344	-0.0479049	-0.0278378	0.0244112	-0.06506	-0.0739253	0.0371954	-0.0500261	-0.107784	-0.0506102	0.00729915	-0.0541025	-0.00331752	-0.0784983	-0.0861662	-0.0601409
gl	0.0475342	0.00817717	0.0945897	0.264038	0.0499769	0.0756644	0.204201	0.218203	0.12981	0.0941968	0.2602	0.180375	0.217863	0.24025	0.259514	0.0561118	0.0308648	0.0783606	0.303358	0.182994	0.0143166	0.148002	0.142578	0.20993	0.124561	0.396285	0.195387	-0.0122205	0.125277	0.20259	0.140672	0.108524	0.194345	0.169425	0.3217	0.100034	0.201561	0.220279	0.169411	0.0276189	0.046235	0.248903	0.120978	0.102015	0.093205	0.0223358	0.0486869	0.0291463	0.0837557
lz	0.129375	0.0400022	0.291427	0.290159	0.0834497	0.363661	0.0501061	0.0664408	0.168026	0.121649	0.293072	0.270421	0.114534	0.283249	0.274234	0.566692	0.163777	0.0554447	0.243173	0.318825	0.166047	0.412484	0.0588224	0.176775	0.0657039	0.158059	0.24491	-0.0173927	0.139491	0.245605	0.162207	0.257729	0.296336	0.092474	0.150745	0.0718645	0.00540711	0.343944	0.414828	0.0180617	0.48613	0.275106	0.0838248	0.120984	0.143964	0.0269149	0.554237	0.18528	0.481691
net	0.0827332	0.0864229	0.27518	0.304072	0.201631	0.186879	0.214722	0.167449	0.292352	0.302609	0.298792	0.281133	0.252238	0.30359	0.286006	0.197218	0.297808	0.233178	0.304692	0.359257	0.275486	0.321029	0.217866	0.286376	0.296715	0.270957	0.28706	-0.0184635	0.338319	0.248589	0.325121	0.164352	0.307701	0.101592	0.22864	0.0899726	0.0708709	0.345685	0.368448	0.000628037	0.154823	0.304068	0.265121	0.140404	0.26035	0.0447147	0.21433	0.295708	0.255074
ouib	0.0632541	0.12386	0.238075	0.312075	0.247029	0.294141	0.162525	0.102977	0.233788	0.226147	0.24845	0.22384	0.212912	0.297428	0.309606	0.206225	0.201245	0.179108	0.288453	0.313489	0.224295	0.309218	0.147475	0.212017	0.20126	0.234258	0.341369	-0.0185191	0.251062	0.220844	0.257713	0.269505	0.29171	0.0509475	0.177023	0.106374	0.0536422	0.282953	0.339219	0.000555785	0.1833	0.285978	0.199271	0.135075	0.28613	0.0805663	0.229093	0.233982	0.213469
pdm3	0.0450143	0.118414	0.412932	0.386052	0.247111	0.269349	0.143245	0.0999251	0.352486	0.297034	0.371361	0.393619	0.19173	0.379475	0.352468	0.383004	0.36828	0.181474	0.332117	0.422905	0.353413	0.390724	0.177702	0.27855	0.230826	0.229388	0.287371	-0.0208173	0.343139	0.317955	0.348906	0.216218	0.396938	0.0337943	0.196875	0.0806171	-0.00281506	0.420761	0.506689	-0.00722277	0.287069	0.373857	0.235307	0.105222	0.297547	0.0419741	0.410514	0.39018	0.387004
rn	0.00813114	0.213932	0.123101	0.114366	0.333163	0.0840758	0.251945	0.0497666	0.16051	0.227485	0.0834975	0.0882199	0.137107	0.127884	0.125638	0.0720157	0.162435	0.26377	0.120729	0.171435	0.167752	0.109623	0.20321	0.200882	0.209471	0.0780558	0.152982	-0.00865568	0.233586	0.0762946	0.16938	0.112307	0.132527	0.0301715	0.0819775	0.0332823	-0.0206942	0.130273	0.150829	-0.00684055	0.0500264	0.115549	0.282896	0.0580129	0.323476	0.117403	0.0756408	0.194471	0.0778192
salr	0.0111886	0.0788597	0.32917	0.286847	0.167983	0.128697	0.157436	0.131657	0.396185	0.280246	0.291798	0.318718	0.199214	0.311135	0.28364	0.15526	0.384501	0.184901	0.281622	0.313413	0.34317	0.237441	0.163458	0.229131	0.292474	0.23127	0.192319	-0.0182677	0.324214	0.24983	0.378827	0.128755	0.343698	0.0186479	0.168954	0.0899707	0.00436863	0.279299	0.310005	-0.0286504	0.11637	0.302859	0.217155	0.0716098	0.250586	0.0367129	0.174756	0.32529	0.190805
ss	0.0712319	0.00852838	0.15854	0.277261	0.0185127	0.10438	0.0999004	0.345858	0.143291	0.0499047	0.311404	0.242252	0.214677	0.261137	0.284959	0.0963156	0.0513349	0.00205693	0.273729	0.216421	0.0368848	0.185222	0.0842637	0.176386	0.109275	0.361761	0.164908	-0.0185848	0.0859917	0.268193	0.118883	0.100633	0.238776	0.167832	0.31194	0.0901918	0.265995	0.252371	0.21662	-0.00086499	0.0737914	0.297765	0.0473358	0.0943366	0.0683086	0.013382	0.0952435	0.0119872	0.141309
svp	0.0690755	0.0105132	0.0846633	0.126921	0.0246213	0.20091	0.012823	0.0208853	0.0310678	-0.0188703	0.101435	0.0762416	0.0981633	0.101896	0.101232	0.265378	-0.000422214	-0.0105091	0.10174	0.127478	0.00757817	0.199081	0.00040785	0.0566256	0.00906725	0.0813236	0.0881714	-0.0132187	-0.0088232	0.0750996	0.0140036	0.112208	0.095187	0.0758212	0.0613306	0.00383501	0.106625	0.168657	0.194642	0.0553278	0.23436	0.106907	0.00276014	0.0671567	0.0249585	-0.00624461	0.255211	0.0152769	0.24423
topi	0.132161	0.0323301	0.298517	0.315049	0.083219	0.364575	0.0514101	0.0663912	0.192051	0.120168	0.304105	0.270728	0.121871	0.320049	0.293881	0.525845	0.164308	0.0591957	0.237871	0.348742	0.150403	0.438314	0.0659377	0.178539	0.0761097	0.185674	0.270871	-0.0269949	0.137292	0.270367	0.192551	0.230108	0.311915	0.120436	0.159975	0.0733948	0.00796433	0.36325	0.449464	0.023474	0.416296	0.305059	0.0852458	0.141068	0.130787	0.0305027	0.517118	0.172949	0.515199
vri	0.124895	-0.00954083	-0.0123433	0.0265567	-0.0279175	0.0830479	0.0223978	-0.0268209	-0.0521623	-0.0354179	0.0209396	-0.0360846	0.0658502	0.0198927	0.0209894	0.152331	-0.0906129	-0.0132525	0.0424161	0.044431	-0.0733448	0.121173	-0.0346808	0.030217	-0.0203649	0.0434116	0.0589598	0.00538721	-0.0280578	-0.0370984	-0.0471127	0.064953	-0.000825905	0.149688	0.046308	-0.00338032	0.123566	0.116445	0.0938815	0.17687	0.153399	0.0142125	-0.00902648	0.100314	-0.0204757	-0.00917278	0.13926	-0.057874	0.17868
[truncated: 27 more columns]

## Sheet: s3.Fly_larva
TF	Abd-B	CrebA	Dfd	Dif	GATAd	Hnf4	Hr78	Hr83	Jra	Mondo	OdsH	Rel	SREBP	Sp1	Vsx2	br	brk	cnc	dl	dmrt93B	dsf	ey	foxo	fru	grh	jim	lola	psq	rgr	sage	sv	tai	usp	woc
Abd-B	1	-0.00821533	-0.0131227	0.0180382	-0.00527539	-0.00925288	0.066769	0.00774691	-0.011169	-0.00272644	-0.0211679	-0.0297484	-0.0259667	-0.0129818	0.00306784	-0.0116997	-0.0039467	-0.011942	0.0310363	-0.0043379	0.00676873	-0.0215688	-0.0321953	-0.0175963	0.0149103	0.0191639	-0.00507817	-0.00364356	-0.00163161	0.0171192	-0.00164326	-0.0143989	-0.00357268	-0.0148167
CrebA	-0.00821533	1	-0.0457865	0.0601476	0.0140931	0.112896	-0.0214308	0.0686709	0.10482	0.0681268	0.0367524	0.102009	-0.0418955	0.0758857	0.0513363	0.0869631	0.18628	0.0432213	0.11742	0.0161482	0.0578239	-0.0343381	-0.0374112	0.0173129	0.0501497	0.0892655	0.123803	0.0493922	0.0254048	0.14683	0.00477929	0.0732799	0.0817453	0.0226879
Dfd	-0.0131227	-0.0457865	1	-0.0151901	0.00524389	-0.0363684	-0.0229583	-0.0246352	-0.0221633	0.0117918	-0.0274043	-0.0765346	-0.0331383	-0.0347376	-0.0162058	-0.033183	-0.0460505	0.00265888	-0.0245416	-0.0235025	-0.0262219	-0.0399549	-0.0312237	-0.034264	0.101484	-0.0134883	-0.0496228	-0.0347907	-0.040707	-0.0159176	-0.00470444	-0.0257328	-0.0785989	-0.0440687
Dif	0.0180382	0.0601476	-0.0151901	1	0.0185037	-0.0162061	0.0308931	0.0359157	0.0168715	0.0194219	-0.0161612	-0.035223	-0.0468551	-0.0304578	0.263284	-0.00266913	0.00163627	-0.0108913	0.449087	-0.0282747	0.0055752	-0.0499231	-0.0605911	-0.0213252	0.180932	0.0455438	0.0368849	0.0788283	-0.0395214	0.03137	0.0184731	-0.0023094	-0.0125674	-0.0149631
GATAd	-0.00527539	0.0140931	0.00524389	0.0185037	1	0.0654002	0.00704054	0.0978983	0.0818145	0.0914005	0.0423644	0.0201164	0.00318797	0.0221923	0.00375151	0.0352491	0.0258603	0.108462	0.021645	0.0467127	0.0574043	0.0211732	0.0217495	0.0178462	-0.0057264	0.0394099	-0.00277642	0.0194585	0.0462129	0.0240198	-0.00189121	0.0581499	-0.0251907	-0.0020864
Hnf4	-0.00925288	0.112896	-0.0363684	-0.0162061	0.0654002	1	0.0202803	0.166548	0.153742	0.0335111	0.225028	0.0300726	0.139051	0.151478	-0.0206695	0.236051	0.160775	0.159195	-0.000843857	0.139172	0.121075	0.211311	0.161384	0.156266	-0.0323034	0.0503605	0.0676463	0.0969375	0.248534	0.112501	-0.00838891	0.132675	0.0168775	0.137112
Hr78	0.066769	-0.0214308	-0.0229583	0.0308931	0.00704054	0.0202803	1	-0.00577394	-0.0116941	-0.00476993	-0.0370334	-0.0602281	-0.029115	-0.055476	0.0457697	-0.032316	0.0173532	0.00857174	-0.00449215	0.0103312	0.0114456	-0.0290212	-0.0465788	-0.053103	-0.0132191	-0.00948557	-0.0465168	-0.0662139	-0.0362757	-0.00284037	-0.00287489	0.0181594	-0.0917517	0.0948434
Hr83	0.00774691	0.0686709	-0.0246352	0.0359157	0.0978983	0.166548	-0.00577394	1	0.162853	0.101544	0.131394	0.0555413	0.00618846	0.0584575	-0.00484531	0.141942	0.0817279	0.238841	0.0482889	0.0567917	0.0630151	-0.00783406	0.0490204	0.0296779	0.00584634	0.142141	0.0269281	0.0792083	0.160817	0.0420657	0.0253098	0.0823812	0.03788	-0.00618906
Jra	-0.011169	0.10482	-0.0221633	0.0168715	0.0818145	0.153742	-0.0116941	0.162853	1	0.0845388	0.0867898	0.086228	0.00884682	0.0686489	-0.0170132	0.127231	0.110492	0.15306	0.0516428	0.056159	0.0897138	0.0330026	0.0278922	0.0476584	0.0227611	0.073796	0.0677676	0.0680229	0.0886194	0.0967948	-0.00400405	0.086531	0.0641262	0.0343043
Mondo	-0.00272644	0.0681268	0.0117918	0.0194219	0.0914005	0.0335111	-0.00476993	0.101544	0.0845388	1	0.0388243	0.0111229	0.0193334	0.0112615	-0.0122101	0.0412291	0.0651518	0.0999012	0.0166531	0.0613686	0.0449041	0.0251442	0.0186081	0.0254912	0.00742325	0.0432374	0.00806068	0.033083	0.0158418	0.0169874	-0.000977418	0.0813973	0.0198496	0.0190964
OdsH	-0.0211679	0.0367524	-0.0274043	-0.0161612	0.0423644	0.225028	-0.0370334	0.131394	0.0867898	0.0388243	1	-0.0271378	0.337313	0.278857	-0.0147701	0.329613	0.125027	0.162363	-0.0308741	0.315491	0.0765277	0.368539	0.370997	0.32044	-0.00245841	0.0326564	0.105686	0.21383	0.382745	0.0690242	-0.00758862	0.0376394	-0.0319412	0.256975
Rel	-0.0297484	0.102009	-0.0765346	-0.035223	0.0201164	0.0300726	-0.0602281	0.0555413	0.086228	0.0111229	-0.0271378	1	-0.114147	0.00283703	-0.0380566	0.040126	0.0117409	0.0262916	0.00661637	-0.0300975	0.0211903	-0.0884043	-0.134485	-0.100948	-0.0598538	0.0611804	0.0550156	-0.0954479	-0.018419	0.0524361	0.00446047	0.0155483	0.309482	-0.114918
SREBP	-0.0259667	-0.0418955	-0.0331383	-0.0468551	0.00318797	0.139051	-0.029115	0.00618846	0.00884682	0.0193334	0.337313	-0.114147	1	0.386102	-0.027118	0.260908	0.047663	0.0565497	-0.0468081	0.359151	0.0156204	0.381552	0.461092	0.377283	-0.0260625	0.0117594	0.0695291	0.196147	0.31941	0.0331504	-0.0113494	0.0061264	-0.140652	0.304156
Sp1	-0.0129818	0.0758857	-0.0347376	-0.0304578	0.0221923	0.151478	-0.055476	0.0584575	0.0686489	0.0112615	0.278857	0.00283703	0.386102	1	-0.0115309	0.257749	0.0797575	0.0562507	-0.0131756	0.232485	0.0270223	0.268542	0.333117	0.312778	-0.00232029	0.0779536	0.148431	0.223147	0.304572	0.0693475	-0.0137738	0.0107557	0.00571451	0.216729
Vsx2	0.00306784	0.0513363	-0.0162058	0.263284	0.00375151	-0.0206695	0.0457697	-0.00484531	-0.0170132	-0.0122101	-0.0147701	-0.0380566	-0.027118	-0.0115309	1	0.0128125	0.0227121	-0.025593	0.161892	0.00736772	-0.0185379	-0.019618	-0.0444095	0.00274906	0.209984	0.0218602	0.00874121	0.0650332	-0.0331898	0.0226952	0.0144932	0.018881	-0.0199424	0.000611114
br	-0.0116997	0.0869631	-0.033183	-0.00266913	0.0352491	0.236051	-0.032316	0.141942	0.127231	0.0412291	0.329613	0.040126	0.260908	0.257749	0.0128125	1	0.111319	0.129951	0.0111589	0.232713	0.0723618	0.33624	0.297594	0.294209	0.016837	0.0654726	0.110762	0.18012	0.308652	0.0909471	-0.00899851	0.072068	0.0569506	0.224426
brk	-0.0039467	0.18628	-0.0460505	0.00163627	0.0258603	0.160775	0.0173532	0.0817279	0.110492	0.0651518	0.125027	0.0117409	0.047663	0.0797575	0.0227121	0.111319	1	0.0874695	0.0456515	0.0623502	0.159232	0.0630252	0.0364221	0.0540047	0.0179619	0.0391216	0.0911462	0.0636036	0.108074	0.14925	-0.0101896	0.10934	-0.0073551	0.0992814
cnc	-0.011942	0.0432213	0.00265888	-0.0108913	0.108462	0.159195	0.00857174	0.238841	0.15306	0.0999012	0.162363	0.0262916	0.0565497	0.0562507	-0.025593	0.129951	0.0874695	1	-0.0168464	0.109868	0.100584	0.0717298	0.0758575	0.089789	-0.0419249	0.0544174	0.0331861	0.0213359	0.144611	0.0819179	-0.00428117	0.093577	0.0108455	0.0354991
dl	0.0310363	0.11742	-0.0245416	0.449087	0.021645	-0.000843857	-0.00449215	0.0482889	0.0516428	0.0166531	-0.0308741	0.00661637	-0.0468081	-0.0131756	0.161892	0.0111589	0.0456515	-0.0168464	1	-0.0239113	-0.00562516	-0.043155	-0.071733	-0.0206017	0.169042	0.033091	0.033311	0.107252	-0.0323993	0.0377301	0.016369	0.00642145	0.0104645	-0.0229662
dmrt93B	-0.0043379	0.0161482	-0.0235025	-0.0282747	0.0467127	0.139172	0.0103312	0.0567917	0.056159	0.0613686	0.315491	-0.0300975	0.359151	0.232485	0.00736772	0.232713	0.0623502	0.109868	-0.0239113	1	0.0562476	0.301029	0.276124	0.24595	0.0157793	0.0238597	0.0747865	0.155803	0.259085	0.0643198	-0.00530707	0.0366938	-0.0286574	0.221422
dsf	0.00676873	0.0578239	-0.0262219	0.0055752	0.0574043	0.121075	0.0114456	0.0630151	0.0897138	0.0449041	0.0765277	0.0211903	0.0156204	0.0270223	-0.0185379	0.0723618	0.159232	0.100584	-0.00562516	0.0562476	1	0.0482573	0.0422897	0.0374787	-0.0227306	0.0254721	0.043083	0.00777145	0.0686731	0.0621071	-0.00520764	0.0989639	-0.0141781	0.0463449
ey	-0.0215688	-0.0343381	-0.0399549	-0.0499231	0.0211732	0.211311	-0.0290212	-0.00783406	0.0330026	0.0251442	0.368539	-0.0884043	0.381552	0.268542	-0.019618	0.33624	0.0630252	0.0717298	-0.043155	0.301029	0.0482573	1	0.416684	0.382592	-0.0219695	-0.0106245	0.0578831	0.167494	0.378561	0.0434523	-0.00773232	0.0172848	-0.100483	0.296934
foxo	-0.0321953	-0.0374112	-0.0312237	-0.0605911	0.0217495	0.161384	-0.0465788	0.0490204	0.0278922	0.0186081	0.370997	-0.134485	0.461092	0.333117	-0.0444095	0.297594	0.0364221	0.0758575	-0.071733	0.276124	0.0422897	0.416684	1	0.453939	-0.0410376	0.00455982	0.0385667	0.19247	0.365995	0.0234411	0.00410368	0.0145082	-0.148008	0.305694
fru	-0.0175963	0.0173129	-0.034264	-0.0213252	0.0178462	0.156266	-0.053103	0.0296779	0.0476584	0.0254912	0.32044	-0.100948	0.377283	0.312778	0.00274906	0.294209	0.0540047	0.089789	-0.0206017	0.24595	0.0374787	0.382592	0.453939	1	0.0191612	0.0278798	0.071678	0.195753	0.31116	0.0396171	0.00297348	0.0125144	-0.0877916	0.313753
grh	0.0149103	0.0501497	0.101484	0.180932	-0.0057264	-0.0323034	-0.0132191	0.00584634	0.0227611	0.00742325	-0.00245841	-0.0598538	-0.0260625	-0.00232029	0.209984	0.016837	0.0179619	-0.0419249	0.169042	0.0157793	-0.0227306	-0.0219695	-0.0410376	0.0191612	1	0.0528169	-0.0179977	0.191476	-0.0476737	0.0153747	0.00953797	-0.0282093	0.0277674	0.0496646
jim	0.0191639	0.0892655	-0.0134883	0.0455438	0.0394099	0.0503605	-0.00948557	0.142141	0.073796	0.0432374	0.0326564	0.0611804	0.0117594	0.0779536	0.0218602	0.0654726	0.0391216	0.0544174	0.033091	0.0238597	0.0254721	-0.0106245	0.00455982	0.0278798	0.0528169	1	0.0168419	0.0779967	0.0460847	0.0519023	-0.00368404	0.0408539	0.0403406	0.0162329
lola	-0.00507817	0.123803	-0.0496228	0.0368849	-0.00277642	0.0676463	-0.0465168	0.0269281	0.0677676	0.00806068	0.105686	0.0550156	0.0695291	0.148431	0.00874121	0.110762	0.0911462	0.0331861	0.033311	0.0747865	0.043083	0.0578831	0.0385667	0.071678	-0.0179977	0.0168419	1	0.0302066	0.0985068	0.0452854	-0.00549383	0.0174759	0.0897443	0.0246944
psq	-0.00364356	0.0493922	-0.0347907	0.0788283	0.0194585	0.0969375	-0.0662139	0.0792083	0.0680229	0.033083	0.21383	-0.0954479	0.196147	0.223147	0.0650332	0.18012	0.0636036	0.0213359	0.107252	0.155803	0.00777145	0.167494	0.19247	0.195753	0.191476	0.0779967	0.0302066	1	0.164211	0.0357594	0.00425814	-0.00969227	0.00406114	0.176405
rgr	-0.00163161	0.0254048	-0.040707	-0.0395214	0.0462129	0.248534	-0.0362757	0.160817	0.0886194	0.0158418	0.382745	-0.018419	0.31941	0.304572	-0.0331898	0.308652	0.108074	0.144611	-0.0323993	0.259085	0.0686731	0.378561	0.365995	0.31116	-0.0476737	0.0460847	0.0985068	0.164211	1	0.062025	-0.00968389	0.0517559	-0.0345859	0.205556
sage	0.0171192	0.14683	-0.0159176	0.03137	0.0240198	0.112501	-0.00284037	0.0420657	0.0967948	0.0169874	0.0690242	0.0524361	0.0331504	0.0693475	0.0226952	0.0909471	0.14925	0.0819179	0.0377301	0.0643198	0.0621071	0.0434523	0.0234411	0.0396171	0.0153747	0.0519023	0.0452854	0.0357594	0.062025	1	-0.0038883	0.0585569	0.0139876	0.0813077
sv	-0.00164326	0.00477929	-0.00470444	0.0184731	-0.00189121	-0.00838891	-0.00287489	0.0253098	-0.00400405	-0.000977418	-0.00758862	0.00446047	-0.0113494	-0.0137738	0.0144932	-0.00899851	-0.0101896	-0.00428117	0.016369	-0.00530707	-0.00520764	-0.00773232	0.00410368	0.00297348	0.00953797	-0.00368404	-0.00549383	0.00425814	-0.00968389	-0.0038883	1	-0.00516193	-0.0159288	-0.0114118
tai	-0.0143989	0.0732799	-0.0257328	-0.0023094	0.0581499	0.132675	0.0181594	0.0823812	0.086531	0.0813973	0.0376394	0.0155483	0.0061264	0.0107557	0.018881	0.072068	0.10934	0.093577	0.00642145	0.0366938	0.0989639	0.0172848	0.0145082	0.0125144	-0.0282093	0.0408539	0.0174759	-0.00969227	0.0517559	0.0585569	-0.00516193	1	-0.00423767	0.0352693
usp	-0.00357268	0.0817453	-0.0785989	-0.0125674	-0.0251907	0.0168775	-0.0917517	0.03788	0.0641262	0.0198496	-0.0319412	0.309482	-0.140652	0.00571451	-0.0199424	0.0569506	-0.0073551	0.0108455	0.0104645	-0.0286574	-0.0141781	-0.100483	-0.148008	-0.0877916	0.0277674	0.0403406	0.0897443	0.00406114	-0.0345859	0.0139876	-0.0159288	-0.00423767	1	-0.106389
woc	-0.0148167	0.0226879	-0.0440687	-0.0149631	-0.0020864	0.137112	0.0948434	-0.00618906	0.0343043	0.0190964	0.256975	-0.114918	0.304156	0.216729	0.000611114	0.224426	0.0992814	0.0354991	-0.0229662	0.221422	0.0463449	0.296934	0.305694	0.313753	0.0496646	0.0162329	0.0246944	0.176405	0.205556	0.0813077	-0.0114118	0.0352693	-0.106389	1

## Sheet: s4.Fly_embryo
TF	ATbp	Abd-B	Adf1	Aef1	Antp	Asciz	Atf-2	Atf3	Atf6	Awh	B-H1	B-H2	Bdp1	Blimp-1	BtbVII	BuGZ	C15	CG10147	CG10209	CG1024	CG10274	CG10321	CG10366	CG10431	CG10462	CG10543	CG10654	CG10949	CG10959	CG10979	CG11085	CG11093	CG11247	CG11398	CG11456	CG11504	CG11560	CG11695	CG11696	CG11723	CG11906	CG11966	CG12071	CG12104	CG12155	CG12219	CG12236	CG12299	CG1233
ATbp	1	0.0159168	0.00675239	0.00561418	0.0279519	0.309253	0.0214906	-0.00265411	0.0618014	0.105694	-0.00360726	0.0308822	0.0175834	0.156336	0.069836	0.0289535	0.00965163	0.0397222	0.169205	0.0289086	0.00849318	-0.000749701	0.0376999	0.072359	-0.00254992	0.0647208	0.041498	-0.00366456	0.016997	0.0917611	0.00405165	0.00488919	0.0115773	0.162387	0.0112779	0.0829724	-0.00553763	0.0592458	0.0310742	0.0079012	-0.0054618	-0.00333153	0.225206	0.0142503	0.00961675	0.120506	0.105809	0.0745757	0.177979
Abd-B	0.0159168	1	0.0171182	0.0600013	0.0181551	0.012929	0.00757677	0.0138047	0.0230566	0.0537829	0.0206777	0.0159475	-0.000753666	0.0578307	0.00614013	0.024048	-0.00299112	0.0177547	0.0223084	0.0946987	0.0176099	0.0425902	0.043822	0.014581	0.00581597	0.0105919	0.0536567	0.0183485	0.0112727	0.0501012	0.0195732	0.000943263	0.00831139	-0.00333743	0.0137547	0.0655346	0.00273048	0.0217037	0.00429641	0.113457	0.0240212	0.00770946	0.0218251	0.0253371	0.0477032	0.0144276	0.00534896	0.0186322	0.0254464
Adf1	0.00675239	0.0171182	1	0.0500406	0.0080673	-0.00074374	0.0128265	0.00945724	0.0632363	0.0115109	-0.000435768	0.0574263	0.00120369	0.0183855	0.0285351	0.0390533	0.00274916	0.033305	0.0192366	-0.012869	0.00763671	0.136223	0.0191196	0.0233711	0.0101596	0.13648	-0.00355186	0.0232339	-0.00379397	0.00689143	0.00866566	-0.00680657	0.0205336	0.00199639	0.00566716	0.0402635	-0.00760603	0.0231371	0.00239581	-0.00539963	0.0759652	0.0173493	0.0858185	-0.00245067	0.0396556	0.00510902	-0.00395241	0.0365264	0.019795
Aef1	0.00561418	0.0600013	0.0500406	1	0.0340241	0.00409653	0.0298739	-0.00198604	0.0661481	0.0129529	0.0552406	0.017798	-0.00488866	0.0170414	-0.00488866	0.0260236	0.0448353	0.0676217	0.0157752	0.027264	-0.00418169	0.0337517	0.137439	0.00950959	-0.00190808	0.0249955	0.0128096	0.0175861	0.045412	0.0232505	0.0850473	0.0362463	0.0343559	-0.00213346	0.054493	0.0681607	0.0550386	0.0551625	0.0214116	0.0245417	0.00207045	0.00958316	0.0353531	-0.00123144	0.0219473	0.021719	-0.00198604	0.0206721	0.0105654
Antp	0.0279519	0.0181551	0.0080673	0.0340241	1	0.010909	-0.00115883	0.0545499	0.0388744	-0.00707145	0.0392914	-0.00454465	0.00417287	0.0305082	-0.0034286	0.0185157	0.00906539	0.00461408	0.0260477	0.0194629	-0.00293278	0.0124922	0.0822997	0.00927274	-0.00133821	-0.000921156	0.0194961	0.00342175	0.00393484	0.0529333	0.0132841	0.0186181	0.0332246	-0.00149628	0.0245377	0.0430703	0.0143558	0.0284887	0.0129697	-0.0036927	0.0146824	0.0103835	0.0416156	-0.000863653	0.00420808	0.0154766	0.0172547	-0.00159299	0.0195135
Asciz	0.309253	0.012929	-0.00074374	0.00409653	0.010909	1	0.0111213	-0.00239375	0.054029	0.0871788	-0.00325339	0.04268	0.0163478	0.117955	0.0697239	0.0441528	0.00841819	0.0221044	0.0804656	0.0243985	0.00534853	-0.000427459	0.01082	0.0736009	-0.00229978	0.0586517	0.0828329	-0.00449717	0.00156855	0.0776659	-0.00069846	0.00753587	0.0202668	0.0888571	0.00570723	0.0687515	-0.0012255	0.0578213	0.0284207	0.0101842	0.00119284	-0.00224226	0.183074	0.0512884	-0.00587335	0.145183	0.0848995	0.064063	0.177696
Atf-2	0.0214906	0.00757677	0.0128265	0.0298739	-0.00115883	0.0111213	1	-0.000560231	0.00763498	0.0164078	-0.000761421	-0.0018279	0.0174748	0.0216775	-0.00137901	0.0486465	-0.0016074	0.0182904	0.0719328	0.00811439	-0.00117959	-0.00274572	0.0136295	0.00994657	-0.000538238	-0.00311913	-0.000503456	-0.00230644	0.0212686	0.0254533	-0.00178044	0.00974697	0.0192103	0.0424581	0.00137211	0.0166772	-0.0025558	0.0189904	0.00927098	-0.00148523	-0.00459728	-0.00148933	0.00377336	-0.000347368	0.0175393	-0.00114302	0.0456911	0.0398091	0.0130529
Atf3	-0.00265411	0.0138047	0.00945724	-0.00198604	0.0545499	-0.00239375	-0.000560231	1	0.0138961	0.01784	-0.000915208	0.00967547	0.0140314	0.015455	0.0297204	-0.000633319	-0.00193206	-0.00159269	-0.00170458	0.00583619	-0.00141783	0.0126488	0.010713	0.00747797	-0.000646949	0.0315125	-0.000605142	0.00667661	0.00709853	0.0277458	-0.00214004	-0.00263392	-0.00291355	-0.000723367	0.00932781	0.00788924	0.00547691	0.0148977	0.00687567	-0.00178521	0.0189717	-0.00179014	-0.00433505	-0.000417528	0.0140867	-0.00137388	-0.000673383	-0.000770123	-0.00211513
Atf6	0.0618014	0.0230566	0.0632363	0.0661481	0.0388744	0.054029	0.00763498	0.0138961	1	0.0330481	0.0458239	0.110443	0.00277582	0.019345	0.0893399	0.0151533	0.0208766	0.0755419	0.0831023	0.00383375	0.0137066	0.021804	0.0975976	0.0080871	0.00586986	0.118194	0.0161228	0.0102081	0.00928002	0.0213704	0.0251313	0.00763686	0.0541647	0.00458619	0.0271229	0.056689	0.00098652	0.11051	0.0341018	0.00466986	0.0211209	0.00782048	0.133247	0.0254699	0.0445165	0.0604451	0.0138961	0.0707508	0.0528557
Awh	0.105694	0.0537829	0.0115109	0.0129529	-0.00707145	0.0871788	0.0164078	0.01784	0.0330481	1	0.0268042	0.0245844	0.0113422	0.132801	0.0136434	0.0375543	0.0120999	0.0151225	0.0417162	0.015235	-0.00460762	0.0165336	0.0286497	0.0393495	0.00132074	0.044979	0.0459877	0.00127079	0.00695973	0.0449403	-0.000769334	0.00914141	0.0296582	0.0211856	-0.00817871	0.0292848	-0.011597	0.04994	0.0244641	-0.00187872	0.0099634	-0.00194247	0.0721663	0.00616117	0.00683584	0.0402376	0.0291304	0.00938932	0.0520031
B-H1	-0.00360726	0.0206777	-0.000435768	0.0552406	0.0392914	-0.00325339	-0.000761421	-0.000915208	0.0458239	0.0268042	1	-0.0029861	-0.00225279	0.0186897	-0.00225279	-0.000860757	0.00729749	0.00985196	0.020151	0.0154187	-0.00192701	0.0131269	0.100522	-0.00352899	-0.000879281	9.63468e-05	0.0307027	0.00318831	0.032346	0.0258541	0.0419423	0.0110472	0.0291736	-0.000983142	0.0288908	0.0345665	0.00841202	0.0813651	0.0457791	-0.00242632	0.00691762	-0.00243301	0.0167134	0.0451104	0.00934128	0.0120497	-0.000915208	-0.00104669	0.00619967
B-H2	0.0308822	0.0159475	0.0574263	0.017798	-0.00454465	0.04268	-0.0018279	0.00967547	0.110443	0.0245844	-0.0029861	1	0.00427127	0.00939231	0.139783	0.0231789	0.0103286	0.0451555	0.0509251	0.00931723	0.017981	0.0113718	0.0012042	0.0257136	-0.00211084	0.161807	-0.00197443	0.00261385	-0.00572027	9.35353e-05	-0.00322373	-0.00859385	0.00437741	0.00869315	0.00191265	0.00949524	-0.00738605	0.0234213	0.00887592	0.0256508	0.0137099	-0.00135652	0.120359	0.0177777	0.0140297	0.0538324	-0.00219709	0.0805539	0.0653436
Bdp1	0.0175834	-0.000753666	0.00120369	-0.00488866	0.00417287	0.0163478	0.0174748	0.0140314	0.00277582	0.0113422	-0.00225279	0.00427127	1	-0.00400084	-0.00408004	0.0151212	0.00623365	-0.00392041	0.00202451	0.00704222	-0.00349001	-0.00812367	0.000171053	0.00182214	-0.00159247	0.0108951	-0.00148956	0.0432485	-0.00260556	-0.000163766	-0.00526772	-0.00243383	0.0111747	0.0128258	0.00260637	-0.00516681	-0.00059204	0.00366824	-0.0067123	-0.00439432	0.104234	0.0370735	-0.000657313	-0.00102775	0.00234882	0.0351483	0.0297204	-0.00189566	-0.000181805
Blimp-1	0.156336	0.0578307	0.0183855	0.0170414	0.0305082	0.117955	0.0216775	0.015455	0.019345	0.132801	0.0186897	0.00939231	-0.00400084	1	0.00433308	0.0102162	0.00335568	0.026383	0.0733123	0.00422962	0.0196273	0.0047377	0.0309913	0.0701938	0.00966508	0.0350417	0.0265746	-0.0119825	0.0176775	0.280247	-0.00295302	-0.00469938	0.0154689	0.0353919	-0.0115313	0.222172	-0.0140869	0.0722992	0.0272071	-0.0145178	0.0100414	-0.00044358	0.0829545	0.0167662	0.0198065	0.0447927	0.0256772	0.00529692	0.0729308
BtbVII	0.069836	0.00614013	0.0285351	-0.00488866	-0.0034286	0.0697239	-0.00137901	0.0297204	0.0893399	0.0136434	-0.00225279	0.139783	-0.00408004	0.00433308	1	0.0318014	0.000738943	0.0759247	0.0517874	-0.00732862	0.0413209	0.0113807	-0.00502876	0.0182491	-0.00159247	0.111513	0.0334223	-0.00297226	-0.00659064	-0.00190542	-0.000300814	-0.00243383	0.0111747	-0.00178057	-0.00343021	0.0232139	-0.0040769	0.0472986	0.0206884	0.00154756	0.000378748	-0.00440643	0.149544	-0.00102775	0.00234882	0.0582664	-0.00165754	0.0667094	0.0852365
BuGZ	0.0289535	0.024048	0.0390533	0.0260236	0.0185157	0.0441528	0.0486465	-0.000633319	0.0151533	0.0375543	-0.000860757	0.0231789	0.0151212	0.0102162	0.0318014	1	-0.00181711	0.015856	0.0146204	0.0253107	0.0181454	0.00537444	0.0116404	0.0511129	-0.000608458	0.048959	-0.000569138	0.00743851	-0.00251818	0.00757573	-0.00201271	-0.00247721	0.00682982	-0.000680329	0.0053414	-0.00464583	0.00619978	-0.00276605	0.00764459	0.0138183	0.0156391	-0.00168363	0.054685	0.0655735	-0.00155393	0.0991998	0.0812047	0.035062	0.0504302
C15	0.00965163	-0.00299112	0.00274916	0.0448353	0.00906539	0.00841819	-0.0016074	-0.00193206	0.0208766	0.0120999	0.00729749	0.0103286	0.00623365	0.00335568	0.000738943	-0.00181711	1	0.0125803	0.00579786	0.009978	0.0087653	0.0212529	0.0343458	0.00666361	-0.00185621	0.0139423	-0.00173626	-0.0046449	0.0128609	0.0114655	0.0578707	0.0133184	0.0326233	-0.00207547	0.0136641	0.00410222	0.0271147	0.0134283	0.0358963	-0.0051221	-0.00384292	-0.00513622	0.0176732	-0.00119796	0.0173084	0.00267883	0.0250267	0.00957898	0.0111992
CG10147	0.0397222	0.0177547	0.033305	0.0676217	0.00461408	0.0221044	0.0182904	-0.00159269	0.0755419	0.0151225	0.00985196	0.0451555	-0.00392041	0.026383	0.0759247	0.015856	0.0125803	1	0.0800995	0.000433793	0.0277272	0.00572235	0.0113976	0.0109493	-0.00153016	0.0659056	-0.00143128	-0.00655699	-0.00218672	0.0173972	0.010441	-0.00201657	0.00456141	0.0134855	0.00378448	0.073658	-1.46388e-05	0.0649159	0.0139128	-0.00422239	0.00563148	0.00193104	0.0730903	0.0516407	0.029467	0.0127851	-0.00159269	0.0410043	0.0420455
CG10209	0.169205	0.0223084	0.0192366	0.0157752	0.0260477	0.0804656	0.0719328	-0.00170458	0.0831023	0.0417162	0.020151	0.0509251	0.00202451	0.0733123	0.0517874	0.0146204	0.00579786	0.0800995	1	0.0239127	0.00367499	0.00429275	0.0555183	0.0293763	0.0142445	0.0380434	0.0154463	-0.00327138	0.00872628	0.0531649	0.00424466	0.0169651	0.0283133	0.0692017	-0.0001743	0.0621348	-0.000997446	0.0597457	0.0197478	0.00126019	0.00738023	-0.0045315	0.103464	0.0727434	0.0270185	0.0489878	0.0898524	0.0781231	0.136371
CG1024	0.0289086	0.0946987	-0.012869	0.027264	0.0194629	0.0243985	0.00811439	0.00583619	0.00383375	0.015235	0.0154187	0.00931723	0.00704222	0.00422962	-0.00732862	0.0253107	0.009978	0.000433793	0.0239127	1	-0.0062688	0.00366958	0.0318622	0.0415813	0.00631271	-0.00527162	0.00713053	0.0201991	0.0262192	0.0214487	0.00727942	0.00655373	0.0159759	0.0132124	-0.00162548	-0.00424674	0.0118672	0.00537905	0.0143307	0.385983	0.0350326	0.00872933	0.023022	-0.00184605	0.00711149	0.0198993	0.0234632	0.00430295	0.0188746
CG10274	0.00849318	0.0176099	0.00763671	-0.00418169	-0.00293278	0.00534853	-0.00117959	-0.00141783	0.0137066	-0.00460762	-0.00192701	0.017981	-0.00349001	0.0196273	0.0413209	0.0181454	0.0087653	0.0277272	0.00367499	-0.0062688	1	0.0158281	0.00784302	0.00892036	-0.00136218	0.0256776	-0.00127415	-0.00133914	-0.00563754	0.0271295	0.00129436	-0.000816759	-0.00613459	-0.00152308	0.00490854	0.0274766	-0.00646823	0.0320208	-0.00117045	-0.00375884	0.0023592	0.00315076	0.0288765	-0.000879122	0.0339826	0.0241042	-0.00141783	0.0144017	0.0131495
CG10321	-0.000749701	0.0425902	0.136223	0.0337517	0.0124922	-0.000427459	-0.00274572	0.0126488	0.021804	0.0165336	0.0131269	0.0113718	-0.00812367	0.0047377	0.0113807	0.00537444	0.0212529	0.00572235	0.00429275	0.00366958	0.0158281	1	0.00584546	0.0227605	0.00512923	0.0152337	-0.00296583	0.0216533	0.0152356	0.0171537	0.0248564	0.003558	0.00623629	0.0113033	0.00177587	0.00413378	-0.00265678	0.0170032	0.0244385	0.00031119	0.0460101	0.00929834	0.0411031	-0.00204632	0.0245133	-0.00281656	0.0126488	-0.00377441	0.00751137
CG10366	0.0376999	0.043822	0.0191196	0.137439	0.0822997	0.01082	0.0136295	0.010713	0.0975976	0.0286497	0.100522	0.0012042	0.000171053	0.0309913	-0.00502876	0.0116404	0.0343458	0.0113976	0.0555183	0.0318622	0.00784302	0.00584546	1	0.0021395	-0.00196276	0.00732454	0.0407418	-0.00214743	0.0275177	0.0626097	0.0661978	0.0249344	0.0478439	0.0215569	0.0488125	0.0791291	0.0275139	0.0768057	0.0299181	0.00907708	-0.00214996	-0.00543104	0.0519797	-0.00126673	0.0471512	0.0459551	-0.00204296	-0.00233646	0.00992405
CG10431	0.072359	0.014581	0.0233711	0.00950959	0.00927274	0.0736009	0.00994657	0.00747797	0.0080871	0.0393495	-0.00352899	0.0257136	0.00182214	0.0701938	0.0182491	0.0511129	0.00666361	0.0109493	0.0293763	0.0415813	0.00892036	0.0227605	0.0021395	1	-0.00249459	0.0243101	-0.00233339	0.00662369	-0.00264726	0.0691331	-0.00187296	0.0054462	0.00525892	0.0534867	-0.00562853	0.0177034	-0.000656614	0.0120069	0.00708027	0.0617956	0.0351227	0.000707608	0.0443696	0.0146313	0.00186879	0.0540825	0.047776	0.0234629	0.0725067
CG10462	-0.00254992	0.00581597	0.0101596	-0.00190808	-0.00133821	-0.00229978	-0.000538238	-0.000646949	0.00586986	0.00132074	-0.000879281	-0.00211084	-0.00159247	0.00966508	-0.00159247	-0.000608458	-0.00185621	-0.00153016	0.0142445	0.00631271	-0.00136218	0.00512923	-0.00196276	-0.00249459	1	-0.00360194	0.0439881	0.0366744	0.0381274	0.038287	0.0233076	0.0181488	0.0253068	-0.000694971	0.0050096	0.00890671	-0.00295141	0.00645773	-0.00261986	-0.00171513	0.0354866	0.01341	-0.00416488	-0.000401138	-0.00158737	-0.00131995	-0.000646949	-0.000739891	0.010797
CG10543	0.0647208	0.0105919	0.13648	0.0249955	-0.000921156	0.0586517	-0.00311913	0.0315125	0.118194	0.044979	9.63468e-05	0.161807	0.0108951	0.0350417	0.111513	0.048959	0.0139423	0.0659056	0.0380434	-0.00527162	0.0256776	0.0152337	0.00732454	0.0243101	-0.00360194	1	0.012324	0.000147564	-0.00953311	0.00566829	0.0148772	-0.00738327	0.011818	0.00910398	0.00656929	0.0233159	-0.00143889	0.0473654	0.00417274	-0.00459748	0.0195097	-0.00197577	0.157035	0.00904454	0.0138727	0.0373818	0.0033032	0.0573894	0.0537234
CG10654	0.041498	0.0536567	-0.00355186	0.0128096	0.0194961	0.0828329	-0.000503456	-0.000605142	0.0161228	0.0459877	0.0307027	-0.00197443	-0.00148956	0.0265746	0.0334223	-0.000569138	-0.00173626	-0.00143128	0.0154463	0.00713053	-0.00127415	-0.00296583	0.0407418	-0.00233339	0.0439881	0.012324	1	0.00802173	0.0084709	0.02274	0.0251906	-0.002367	0.00739683	-0.00065006	0.0170432	0.0290803	-0.00276069	0.0172048	0.00823352	0.0146137	0.000485492	-0.00160872	0.0302682	-0.000375215	0.0510499	0.0408317	-0.000605142	-0.000692078	0.0529567
CG10949	-0.00366456	0.0183485	0.0232339	0.0175861	0.00342175	-0.00449717	-0.00230644	0.00667661	0.0102081	0.00127079	0.00318831	0.00261385	0.0432485	-0.0119825	-0.00297226	0.00743851	-0.0046449	-0.00655699	-0.00327138	0.0201991	-0.00133914	0.0216533	-0.00214743	0.00662369	0.0366744	0.000147564	0.00802173	1	-0.00862296	0.0228093	0.00614652	-0.00108801	-0.00315539	0.00581883	-0.0104457	-0.0129757	0.0209336	0.00103046	-0.00651154	0.0177004	0.350136	0.385202	0.00175274	-0.00171894	0.0163819	-0.00101513	-0.00277228	-0.00317055	-0.00568174
CG10959	0.016997	0.0112727	-0.00379397	0.045412	0.00393484	0.00156855	0.0212686	0.00709853	0.00928002	0.00695973	0.032346	-0.00572027	-0.00260556	0.0176775	-0.00659064	-0.00251818	0.0128609	-0.00218672	0.00872628	0.0262192	-0.00563754	0.0152356	0.0275177	-0.00264726	0.0381274	-0.00953311	0.0084709	-0.00862296	1	0.0666614	0.0348202	0.0299009	0.0204247	0.00622522	0.0346294	0.0159841	0.0312146	0.0132272	0.0135484	-0.0070983	-0.00703752	-0.00342548	0.0030416	-0.00166016	0.0294105	0.0185459	0.0168745	-0.00306213	0.0166372
CG10979	0.0917611	0.0501012	0.00689143	0.0232505	0.0529333	0.0776659	0.0254533	0.0277458	0.0213704	0.0449403	0.0258541	9.35353e-05	-0.000163766	0.280247	-0.00190542	0.00757573	0.0114655	0.0173972	0.0531649	0.0214487	0.0271295	0.0171537	0.0626097	0.0691331	0.038287	0.00566829	0.02274	0.0228093	0.0666614	1	0.00525077	0.00791609	0.0141281	0.0368429	-0.00195857	0.24528	-0.007527	0.0837838	0.0517607	-0.00411351	0.0478197	0.0119416	0.0308404	0.00978599	0.0313866	0.0519274	0.0320184	0.0187974	0.0687311
CG11085	0.00405165	0.0195732	0.00866566	0.0850473	0.0132841	-0.00069846	-0.00178044	-0.00214004	0.0251313	-0.000769334	0.0419423	-0.00322373	-0.00526772	-0.00295302	-0.000300814	-0.00201271	0.0578707	0.010441	0.00424466	0.00727942	0.00129436	0.0248564	0.0661978	-0.00187296	0.0233076	0.0148772	0.0251906	0.00614652	0.0348202	0.00525077	1	0.0356602	0.024937	-0.00229889	0.0529049	0.00492818	0.0524858	0.00759575	0.0430146	-0.00105881	-0.00670344	-0.00568912	0.0114976	-0.00132692	0.00969736	0.00760329	-0.00214004	-0.00244748	0.00108261
CG11093	0.00488919	0.000943263	-0.00680657	0.0362463	0.0186181	0.00753587	0.00974697	-0.00263392	0.00763686	0.00914141	0.0110472	-0.00859385	-0.00243383	-0.00469938	-0.00243383	-0.00247721	0.0133184	-0.00201657	0.0169651	0.00655373	-0.000816759	0.003558	0.0249344	0.0054462	0.0181488	-0.00738327	-0.002367	-0.00108801	0.0299009	0.00791609	0.0356602	1	0.0118378	-0.00282944	0.0257044	-0.000606714	0.0475629	0.00461193	0.0116411	-0.00322041	-0.0064383	-0.0032499	0.00523546	-0.00163315	-0.00240015	0.00438505	-0.00263392	-0.00301232	0.0044531
CG11247	0.0115773	0.00831139	0.0205336	0.0343559	0.0332246	0.0202668	0.0192103	-0.00291355	0.0541647	0.0296582	0.0291736	0.00437741	0.0111747	0.0154689	0.0111747	0.00682982	0.0326233	0.00456141	0.0283133	0.0159759	-0.00613459	0.00623629	0.0478439	0.00525892	0.0253068	0.011818	0.00739683	-0.00315539	0.0204247	0.0141281	0.024937	0.0118378	1	-0.00312982	0.0513264	0.0135869	0.0526884	0.0456839	0.0263805	-0.00431506	0.00244661	-0.00094584	0.0458757	-0.00180653	0.0149372	0.0117405	-0.00291355	0.0124124	0.011028
CG11398	0.162387	-0.00333743	0.00199639	-0.00213346	-0.00149628	0.0888571	0.0424581	-0.000723367	0.00458619	0.0211856	-0.000983142	0.00869315	0.0128258	0.0353919	-0.00178057	-0.000680329	-0.00207547	0.0134855	0.0692017	0.0132124	-0.00152308	0.0113033	0.0215569	0.0534867	-0.000694971	0.00910398	-0.00065006	0.00581883	0.00622522	0.0368429	-0.00229889	-0.00282944	-0.00312982	1	-0.00129208	0.0184469	-0.00330004	0.0217523	-0.00292932	0.0252234	-0.00137456	0.0116106	0.0696692	-0.00044852	-0.00177487	0.0337234	0.106772	-0.000827288	0.0665815
CG11456	0.0112779	0.0137547	0.00566716	0.054493	0.0245377	0.00570723	0.00137211	0.00932781	0.0271229	-0.00817871	0.0288908	0.00191265	0.00260637	-0.0115313	-0.00343021	0.0053414	0.0136641	0.00378448	-0.0001743	-0.00162548	0.00490854	0.00177587	0.0488125	-0.00562853	0.0050096	0.00656929	0.0170432	-0.0104457	0.0346294	-0.00195857	0.0529049	0.0257044	0.0513264	-0.00129208	1	0.0156078	0.0495543	0.0241082	0.00736291	-0.0126609	-0.0154419	-0.00897721	0.0261512	0.00455939	0.00471948	0.00821399	-0.000544636	0.00236585	0.00649776
CG11504	0.0829724	0.0655346	0.0402635	0.0681607	0.0430703	0.0687515	0.0166772	0.00788924	0.056689	0.0292848	0.0345665	0.00949524	-0.00516681	0.222172	0.0232139	-0.00464583	0.00410222	0.073658	0.0621348	-0.00424674	0.0274766	0.00413378	0.0791291	0.0177034	0.00890671	0.0233159	0.0290803	-0.0129757	0.0159841	0.24528	0.00492818	-0.000606714	0.0135869	0.0184469	0.0156078	1	-0.00943991	0.0919035	0.042574	-0.0180091	-0.00587254	-0.00681639	0.0985416	0.0266818	0.0302034	0.0457835	0.00788924	0.0132603	0.0502226
CG11560	-0.00553763	0.00273048	-0.00760603	0.0550386	0.0143558	-0.0012255	-0.0025558	0.00547691	0.00098652	-0.011597	0.00841202	-0.00738605	-0.00059204	-0.0140869	-0.0040769	0.00619978	0.0271147	-1.46388e-05	-0.000997446	0.0118672	-0.00646823	-0.00265678	0.0275139	-0.000656614	-0.00295141	-0.00143889	-0.00276069	0.0209336	0.0312146	-0.007527	0.0524858	0.0475629	0.0526884	-0.00330004	0.0495543	-0.00943991	1	0.00243237	-0.00817439	0.0112822	0.00743964	0.0176647	-0.0047718	-0.00190478	0.00644633	-0.0020687	0.00547691	-0.00351334	-0.00417351
CG11695	0.0592458	0.0217037	0.0231371	0.0551625	0.0284887	0.0578213	0.0189904	0.0148977	0.11051	0.04994	0.0813651	0.0234213	0.00366824	0.0722992	0.0472986	-0.00276605	0.0134283	0.0649159	0.0597457	0.00537905	0.0320208	0.0170032	0.0768057	0.0120069	0.00645773	0.0473654	0.0172048	0.00103046	0.0132272	0.0837838	0.00759575	0.00461193	0.0456839	0.0217523	0.0241082	0.0919035	0.00243237	1	0.0971332	-0.00441897	0.00538738	0.002288	0.0892289	0.0269345	0.0402007	0.0421901	0.00597832	0.0434398	0.0650323
CG11696	0.0310742	0.00429641	0.00239581	0.0214116	0.0129697	0.0284207	0.00927098	0.00687567	0.0341018	0.0244641	0.0457791	0.00887592	-0.0067123	0.0272071	0.0206884	0.00764459	0.0358963	0.0139128	0.0197478	0.0143307	-0.00117045	0.0244385	0.0299181	0.00708027	-0.00261986	0.00417274	0.00823352	-0.00651154	0.0135484	0.0517607	0.0430146	0.0116411	0.0263805	-0.00292932	0.00736291	0.042574	-0.00817439	0.0971332	1	4.42397e-05	-0.0101529	-0.00362238	0.0605876	0.0137897	0.0011629	0.0368853	-0.00272691	0.0220756	0.0375651
CG11723	0.0079012	0.113457	-0.00539963	0.0245417	-0.0036927	0.0101842	-0.00148523	-0.00178521	0.00466986	-0.00187872	-0.00242632	0.0256508	-0.00439432	-0.0145178	0.00154756	0.0138183	-0.0051221	-0.00422239	0.00126019	0.385983	-0.00375884	0.00031119	0.00907708	0.0617956	-0.00171513	-0.00459748	0.0146137	0.0177004	-0.0070983	-0.00411351	-0.00105881	-0.00322041	-0.00431506	0.0252234	-0.0126609	-0.0180091	0.0112822	-0.00441897	4.42397e-05	1	0.037307	0.0062651	0.000136467	-0.00110691	0.00754139	0.0106768	-0.00178521	-0.00204168	0.0083974
CG11906	-0.0054618	0.0240212	0.0759652	0.00207045	0.0146824	0.00119284	-0.00459728	0.0189717	0.0211209	0.0099634	0.00691762	0.0137099	0.104234	0.0100414	0.000378748	0.0156391	-0.00384292	0.00563148	0.00738023	0.0350326	0.0023592	0.0460101	-0.00214996	0.0351227	0.0354866	0.0195097	0.000485492	0.350136	-0.00703752	0.0478197	-0.00670344	-0.0064383	0.00244661	-0.00137456	-0.0154419	-0.00587254	0.00743964	0.00538738	-0.0101529	0.037307	1	0.246236	0.0105511	-0.00342625	0.0285171	0.00316496	0.0042732	-0.00203473	-0.00794205
CG11966	-0.00333153	0.00770946	0.0173493	0.00958316	0.0103835	-0.00224226	-0.00148933	-0.00179014	0.00782048	-0.00194247	-0.00243301	-0.00135652	0.0370735	-0.00044358	-0.00440643	-0.00168363	-0.00513622	0.00193104	-0.0045315	0.00872933	0.00315076	0.00929834	-0.00543104	0.000707608	0.01341	-0.00197577	-0.00160872	0.385202	-0.00342548	0.0119416	-0.00568912	-0.0032499	-0.00094584	0.0116106	-0.00897721	-0.00681639	0.0176647	0.002288	-0.00362238	0.0062651	0.246236	1	-0.00688539	-0.00110997	0.0134414	0.0034877	-0.00179014	-0.00204731	-0.00562291
CG12071	0.225206	0.0218251	0.0858185	0.0353531	0.0416156	0.183074	0.00377336	-0.00433505	0.133247	0.0721663	0.0167134	0.120359	-0.000657313	0.0829545	0.149544	0.054685	0.0176732	0.0730903	0.103464	0.023022	0.0288765	0.0411031	0.0519797	0.0443696	-0.00416488	0.157035	0.0302682	0.00175274	0.0030416	0.0308404	0.0114976	0.00523546	0.0458757	0.0696692	0.0261512	0.0985416	-0.0047718	0.0892289	0.0605876	0.000136467	0.0105511	-0.00688539	1	0.036913	0.00945414	0.129909	0.0447941	0.0702337	0.145693
CG12104	0.0142503	0.0253371	-0.00245067	-0.00123144	-0.000863653	0.0512884	-0.000347368	-0.000417528	0.0254699	0.00616117	0.0451104	0.0177777	-0.00102775	0.0167662	-0.00102775	0.0655735	-0.00119796	0.0516407	0.0727434	-0.00184605	-0.000879122	-0.00204632	-0.00126673	0.0146313	-0.000401138	0.00904454	-0.000375215	-0.00171894	-0.00166016	0.00978599	-0.00132692	-0.00163315	-0.00180653	-0.00044852	0.00455939	0.0266818	-0.00190478	0.0269345	0.0137897	-0.00110691	-0.00342625	-0.00110997	0.036913	1	-0.00102446	0.0296237	-0.000417528	-0.000477511	0.0781733
CG12155	0.00961675	0.0477032	0.0396556	0.0219473	0.00420808	-0.00587335	0.0175393	0.0140867	0.0445165	0.00683584	0.00934128	0.0140297	0.00234882	0.0198065	0.00234882	-0.00155393	0.0173084	0.029467	0.0270185	0.00711149	0.0339826	0.0245133	0.0471512	0.00186879	-0.00158737	0.0138727	0.0510499	0.0163819	0.0294105	0.0313866	0.00969736	-0.00240015	0.0149372	-0.00177487	0.00471948	0.0302034	0.00644633	0.0402007	0.0011629	0.00754139	0.0285171	0.0134414	0.00945414	-0.00102446	1	0.0352819	0.0140867	-0.00188959	0.00993212
CG12219	0.120506	0.0144276	0.00510902	0.021719	0.0154766	0.145183	-0.00114302	-0.00137388	0.0604451	0.0402376	0.0120497	0.0538324	0.0351483	0.0447927	0.0582664	0.0991998	0.00267883	0.0127851	0.0489878	0.0198993	0.0241042	-0.00281656	0.0459551	0.0540825	-0.00131995	0.0373818	0.0408317	-0.00101513	0.0185459	0.0519274	0.00760329	0.00438505	0.0117405	0.0337234	0.00821399	0.0457835	-0.0020687	0.0421901	0.0368853	0.0106768	0.00316496	0.0034877	0.129909	0.0296237	0.0352819	1	0.0364343	0.081093	0.110716
CG12236	0.105809	0.00534896	-0.00395241	-0.00198604	0.0172547	0.0848995	0.0456911	-0.000673383	0.0138961	0.0291304	-0.000915208	-0.00219709	0.0297204	0.0256772	-0.00165754	0.0812047	0.0250267	-0.00159269	0.0898524	0.0234632	-0.00141783	0.0126488	-0.00204296	0.047776	-0.000646949	0.0033032	-0.000605142	-0.00277228	0.0168745	0.0320184	-0.00214004	-0.00263392	-0.00291355	0.106772	-0.000544636	0.00788924	0.00547691	0.00597832	-0.00272691	-0.00178521	0.0042732	-0.00179014	0.0447941	-0.000417528	0.0140867	0.0364343	1	-0.000770123	0.096494
CG12299	0.0745757	0.0186322	0.0365264	0.0206721	-0.00159299	0.064063	0.0398091	-0.000770123	0.0707508	0.00938932	-0.00104669	0.0805539	-0.00189566	0.00529692	0.0667094	0.035062	0.00957898	0.0410043	0.0781231	0.00430295	0.0144017	-0.00377441	-0.00233646	0.0234629	-0.000739891	0.0573894	-0.000692078	-0.00317055	-0.00306213	0.0187974	-0.00244748	-0.00301232	0.0124124	-0.000827288	0.00236585	0.0132603	-0.00351334	0.0434398	0.0220756	-0.00204168	-0.00203473	-0.00204731	0.0702337	-0.000477511	-0.00188959	0.081093	-0.000770123	1	0.105381
CG1233	0.177979	0.0254464	0.019795	0.0105654	0.0195135	0.177696	0.0130529	-0.00211513	0.0528557	0.0520031	0.00619967	0.0653436	-0.000181805	0.0729308	0.0852365	0.0504302	0.0111992	0.0420455	0.136371	0.0188746	0.0131495	0.00751137	0.00992405	0.0725067	0.010797	0.0537234	0.0529567	-0.00568174	0.0166372	0.0687311	0.00108261	0.0044531	0.011028	0.0665815	0.00649776	0.0502226	-0.00417351	0.0650323	0.0375651	0.0083974	-0.00794205	-0.00562291	0.145693	0.0781733	0.00993212	0.110716	0.096494	0.105381	1
CG12391	0.0946604	0.067889	0.0169828	0.0495691	0.0565224	0.0584319	0.0361123	0.0234835	0.0769911	0.0253077	0.0138045	0.0221147	0.00401242	0.221575	0.0237667	0.00504445	0.00771464	0.0587051	0.106888	0.0185518	0.0297483	0.0087373	0.0954615	0.0456655	0.0450647	0.0230286	0.027325	0.0138568	0.0663887	0.391994	0.00830742	0.00689383	0.0245372	0.00752712	0.00730958	0.279751	0.0024726	0.100233	0.0474788	-0.0038148	0.0447915	0.0125874	0.0575583	0.012157	0.0536563	0.059997	0.0186375	0.0190329	0.0755537
CG12744	0.038537	0.00772619	0.0231957	0.00658623	0.0113674	0.0122334	0.0322495	-0.000943412	0.0442026	0.00948603	-0.00128221	0.0478008	0.00888341	0.012573	0.0761172	-0.000887282	-0.00270682	0.00942692	0.0303086	-0.00417119	-0.00198639	-0.00462371	0.0153593	0.0251446	-0.000906377	0.0300067	0.0297373	0.00961351	0.0102136	0.0276045	-0.0029982	-0.00369014	0.0280636	0.0245789	0.0170007	0.00677234	-0.00430389	0.0149912	0.0167551	0.00790988	0.00975536	-0.00250799	0.0465613	-0.000584958	0.00892656	0.0385811	0.0265457	0.0950853	0.0498594
CG12769	0.0928017	0.056641	0.102206	0.04298	0.0378871	0.0705951	0.0159	0.0275164	0.127326	0.152762	0.020263	0.113563	0.0137692	0.160492	0.0742547	0.0274258	0.0152644	0.0656986	0.0650401	-0.00825725	0.0240047	0.0139922	0.043946	0.0470796	-0.00384519	0.216107	0.00692383	-0.0045726	-0.0114182	0.0381403	0.00132702	-0.0162807	0.0214119	0.0322675	-0.00291058	0.122672	-0.0179356	0.0709587	0.0344842	0.00463218	0.0198733	-0.00212345	0.185731	0.00768075	0.0282524	0.0547117	0.0216975	0.0314694	0.0645335
CG12942	0.0249231	0.0668495	-0.00289982	0.0342884	-0.00102194	0.0131115	-0.000411033	-0.000494051	0.00930504	0.0119056	0.0379353	0.0145651	-0.00121611	0.0124106	-0.00121611	-0.000464657	-0.00141752	-0.00116853	0.0195413	0.0818778	-0.00104024	0.00844442	0.0332626	0.0530033	-0.000474657	0.00685852	-0.000443984	-0.00203398	0.011356	0.0127439	0.0150321	-0.00193247	-0.00213763	0.0971149	0.00270467	0.0116955	0.00939451	0.0221485	0.0241675	0.117857	0.00929752	-0.0013134	0.0135548	-0.000306334	-0.00121222	-0.001008	-0.000494051	-0.000565028	0.0152433
CG13123	0.0878598	0.0174775	0.00435378	0.0020174	0.0147318	0.0570014	0.0426602	-0.001424	0.0296957	0.0194076	0.0114945	0.0347457	0.00393113	0.0565359	0.0188038	0.0180557	0.0150814	0.0198421	0.0831886	0.0187687	-0.0029983	0.00436033	0.0259104	0.0231601	0.0176188	0.0254987	-0.00127969	0.0165306	0.0267737	0.0613224	-0.00452554	-0.000861258	0.00663821	0.0324377	-0.00691099	0.0209142	-0.00649638	0.0656504	0.00788784	0.0100428	0.0138598	0.023775	0.0519596	-0.000882947	0.0412662	0.0239754	0.0897883	0.0462341	0.0422664
CG13287	-0.00665564	0.0470226	0.0946121	0.0238706	0.0141747	-0.00720594	0.0035505	0.0196515	0.0367957	0.0085607	0.00284573	0.04312	0.0651721	-0.00351432	0.00873251	0.008636	0.00416274	0.022717	-0.0040478	0.0135079	-0.00359129	0.0306862	0.0164943	0.00971498	0.0458696	0.0327072	0.0094166	0.46652	-0.00843061	0.0438978	-0.000730705	-0.0095495	0.0104086	0.000848123	-0.00129458	0.00614112	0.0212519	0.018329	9.32171e-05	0.00650086	0.389745	0.301995	0.0224042	-0.00274533	0.043294	0.00870707	0.00761194	0.00546568	-0.00041196
CG13296	0.139434	0.0328365	0.059154	0.0378893	0.0323816	0.136488	0.0025184	0.00607283	0.16387	0.0403434	0.029676	0.18191	0.00583706	0.0802429	0.171215	0.0420292	0.00708506	0.11166	0.0962998	0.00096876	0.0314568	0.0135104	0.0287673	0.0457153	-0.00469994	0.199798	0.0322029	0.00274136	-0.00274057	0.0366341	0.0104879	-0.00639891	0.0185822	0.0457859	0.00659056	0.125319	-0.00770428	0.110769	0.0458467	0.00779434	0.00871045	-0.00472214	0.27993	0.0499964	0.0171424	0.116582	0.0280024	0.0615313	0.118076
CG13775	0.00141358	0.0162805	0.00378894	0.0216473	0.00410325	0.00733039	-0.0013878	0.0139223	0.0198661	0.01341	-0.00226715	-0.000633323	0.00224918	0.0219876	0.00224918	-0.00156886	-0.00478609	0.0489502	0.0452276	0.0176156	0.0187524	0.0144367	0.00527346	0.0180536	0.0146239	0.0107098	0.0158472	0.0199252	0.0488079	0.0913643	0.00950579	-0.00250061	0.01466	0.0127227	0.00641831	0.041599	0.00277892	0.0143926	-0.0067551	0.0132913	0.0121122	0.00734241	0.00169937	0.0240992	0.021409	0.00425422	0.0295126	0.011727	0.0396977
CG13894	0.0142181	0.0269894	0.106443	0.0179118	0.00795045	0.00774397	-0.00273877	0.019316	0.0830252	0.0449431	0.00398878	0.128327	0.00493967	0.0302605	0.0653894	-0.00044801	0.000418737	0.0901266	0.0310155	-0.0223645	0.00884714	0.00875658	0.0114756	0.0132348	-0.00794856	0.140355	0.00791339	-0.00781416	-0.0118726	-0.00823039	0.00755283	-0.0101069	0.00453175	0.000744651	0.00166133	0.0747743	-0.0132305	0.0349963	0.00865813	-0.00756628	0.00542499	-0.010271	0.131632	0.0226684	0.0262399	0.0254677	0.00207266	0.0206989	0.0347596
CG13897	0.0215824	0.0100393	0.00878118	0.0665519	0.0166493	0.0133957	-0.00153762	-0.00184819	0.00394645	0.0241736	0.0493324	0.00265935	0.00119205	0.0280785	0.00119205	0.0132361	0.0440251	-0.00437132	0.000905771	0.0273067	-0.00389143	0.0259614	0.0550774	0.0113073	0.0128836	0.0103565	0.0453514	-0.00760887	0.0427368	0.0323728	0.0520928	0.0436673	0.0447081	-0.00198537	0.0301174	0.0028476	0.054138	0.0180403	0.0311704	-0.00489975	0.00634941	0.000406443	0.0195648	-0.00114596	-0.00453475	0.0100651	-0.00184819	-0.0021137	0.0302808
CG14014	0.110297	0.0176116	0.0579115	0.112026	0.0571974	0.0821813	0.0199872	0.0157644	0.188028	0.0578338	0.050894	0.0595937	0.0195734	0.0487467	0.0460885	0.0368649	0.0179438	0.0445614	0.110755	0.0215774	0.00733244	0.0131333	0.139272	0.0158816	0.0166334	0.0898651	0.0388208	-0.000203762	0.0100293	0.0359766	0.0322227	0.0105556	0.0616885	0.066179	0.0533202	0.0884862	0.0160307	0.140578	0.0650872	-0.000437937	0.00997964	-0.000477712	0.152354	0.0132316	0.0462798	0.062708	0.0343489	0.0617882	0.0625652
CG14050	0.0449025	0.0424426	0.00618877	0.119443	0.00938542	0.0301602	0.0279275	-0.00108154	0.0532698	0.0416449	0.0691697	0.00387106	0.00711631	0.0332362	-0.00266223	-0.00101719	0.022101	0.017789	0.0353057	0.000711303	0.00914203	-0.00530069	0.131877	0.00210883	-0.00103909	-0.00162604	0.052408	-0.00445265	0.00179276	0.0242839	0.0117515	0.014345	0.0458133	-0.00116182	0.00350352	0.048038	0.0217076	0.0619868	0.0255455	0.0062178	0.000286034	-0.0028752	0.046624	0.0380013	0.0267754	0.0567056	0.0229067	0.0197424	0.0196506
CG14441	0.0324108	0.0378861	0.0228042	0.1109	0.0633409	0.0316701	-0.00272294	0.00476622	0.100296	0.0418107	0.102082	0.0116404	-0.00477924	0.0588301	0.0148831	0.00546884	0.0215803	0.0263532	0.0331506	0.0260297	0.00841638	0.00561337	0.171251	-0.0020985	0.0135899	0.0377543	0.00600331	-0.00163248	0.0196581	0.0517221	0.0455903	0.0203988	0.0535251	0.00396856	0.0517215	0.109433	0.0100682	0.114255	0.0569476	-0.00867686	0.000773935	-0.00262803	0.0866801	0.0238907	0.0116945	0.0407058	0.00476622	0.0454721	0.0386379
CG14667	0.00834326	0.0242331	-0.0135187	0.101359	0.00621811	-0.00176122	-0.0019162	-0.00230323	0.0169371	0.00705703	0.0636179	-0.00401876	-0.00566941	0.000377828	-0.00566941	-0.00216619	0.0608693	0.00897204	-0.00133686	0.0339367	0.000545555	0.0145427	0.0831621	1.88117e-05	-0.00221281	-0.0107467	0.0357596	-0.00948225	0.0512956	0.010703	0.0859682	0.0816769	0.0536495	-0.00247419	0.0611997	0.0259329	0.0977407	0.0214583	0.0387434	0.0282323	-0.0131294	-0.00612295	0.0141066	0.0168427	0.00361804	0.0120008	0.0203636	-0.00263411	0.00728416
CG14710	0.120444	0.0952485	0.0044416	0.0138994	0.0274623	0.109797	0.00981053	0.0188338	0.0157654	0.0445992	0.00980588	0.00480491	0.0063493	0.220979	0.00462701	0.029807	-0.00389976	0.0257999	0.0773125	0.0853553	0.0104144	0.00833173	0.0320413	0.0987392	0.0421113	-0.00221718	0.031751	0.125651	0.0535049	0.421299	0.00470447	0.00613699	0.0172593	0.0402019	-0.00481209	0.185616	0.00968732	0.0449744	0.0242099	0.0707324	0.183181	0.0736367	0.0342282	0.0163933	0.0444832	0.0572627	0.0526341	0.0147178	0.104019
CG14860	-0.00417831	0.007099	0.00699782	0.0293214	0.00571261	-0.00156941	-0.00314923	0.0241655	0.00266535	-0.00410181	-3.99431e-07	0.00273839	0.158741	-0.0119383	-0.00931753	-0.00356008	0.0601106	0.00290108	-0.00404103	0.016867	-0.0046437	0.00171787	9.56059e-05	0.00186608	0.0181818	-0.0057101	-0.00340169	0.188563	0.000923264	0.00339094	0.0432754	0.00142674	0.00813599	-0.00406627	0.00414257	-0.0127195	0.0292949	-0.0100549	0.000362023	0.0137828	0.148625	0.174684	-0.00429917	0.00891792	-0.00643016	-0.000858645	0.0101901	-0.0043291	-0.00293818
CG14965	0.00212165	0.000515395	0.00662273	0.00524714	0.0215964	0.0032008	-0.000879395	0.0234861	0.00597928	-0.000242063	0.0166318	-0.00344877	-0.00260184	-0.00666179	0.00740287	-0.000994122	0.0227543	-0.00250004	0.00705516	0.0065671	0.0094578	0.00499014	0.0130619	0.0216219	-0.00101552	-0.00588499	-0.000949892	0.00167382	0.0207335	0.0307682	0.0121808	-0.00413448	0.00690675	-0.00113547	0.0291701	0.0180758	0.006081	0.00107125	0.00796654	-0.00280225	0.000699238	-0.00280998	0.012776	-0.000655394	-0.00259351	0.0219533	0.0234861	-0.00120886	0.0202607
CG15011	0.138916	0.0339628	0.0084042	0.0269565	0.0252208	0.149323	0.0072091	-0.00320072	0.123091	0.0413266	0.0319359	0.111194	0.0122135	0.0749993	0.136115	0.00572355	0.010956	0.0795284	0.112408	0.00466005	0.0362768	0.00814258	0.0202386	0.0199131	-0.00307507	0.0845375	0.0154037	-0.0071268	0.00605294	0.0460185	0.0210364	0.00444363	0.0264979	0.0424497	0.00450276	0.0811275	-0.00730304	0.0812089	0.0280304	0.00084816	-0.00325851	-0.00540612	0.168147	0.0642318	0.0324589	0.0701332	0.0460883	0.0681836	0.150432
CG15073	0.000777166	-0.000818955	0.0154654	0.00379582	0.00795407	-0.00428008	-0.00100171	-0.00120402	0.00398606	0.0010088	0.0142336	0.00272142	0.00582372	0.000254387	-0.00296372	-0.00113239	-0.00345456	-0.00284776	-0.00304784	-0.000387001	-0.00253512	0.00749874	0.0034918	0.00664288	-0.00115676	0.00514658	-0.00108201	0.000335455	-0.0047874	0.00763946	0.0029982	-0.00470952	-0.000167808	-0.0012934	0.00402408	0.00860675	-0.00549282	-0.000262867	0.0381518	-0.00319201	0.0120736	-0.0032008	-0.000871826	-0.00074655	0.0234921	-0.00245653	-0.00120402	-0.001377	-0.0037819
CG15269	0.0999686	0.10676	0.0368169	0.0828244	0.0460147	0.091407	0.0110839	0.0163103	0.137178	0.0997139	0.0576994	0.112824	-0.00404901	0.14298	0.0763348	0.0228537	0.00447813	0.0920162	0.116054	-0.00335729	0.0106281	0.00632845	0.112212	0.0210651	-0.00119412	0.124542	0.0244385	-0.011902	-0.00261784	0.087005	0.0132534	0.00159719	0.035457	0.0226563	0.0181925	0.26569	-0.00193717	0.119811	0.0558142	-0.00258787	-0.0135274	-0.00097668	0.178135	0.0467939	0.0418522	0.0954216	0.00734698	0.0478992	0.071271
CG1529	0.197908	0.0140696	0.00762245	-0.00471362	0.0124572	0.178793	-0.00132964	-0.00159819	0.0177915	0.0627135	0.00980341	0.00983949	-0.00393395	0.0981641	0.00932808	0.0330861	0.00680878	0.0238155	0.0862475	0.0190092	0.00437857	0.00227866	0.000542667	0.0875143	-0.00153545	0.0209089	0.0347617	-0.00258603	0.00190911	0.10933	7.07764e-05	0.00214628	0.000693994	0.0740055	0.00368245	0.0522463	-0.00729101	0.00809908	0.0178795	0.00808457	-0.000689999	-0.00424866	0.0779612	0.0252332	-0.00392135	0.0606585	0.0797364	0.0408516	0.140852
CG15436	-0.00289226	0.00751877	0.0151726	0.0131864	-0.00464347	-0.00798004	-0.00186764	0.00937866	-0.00261306	-0.00216572	-0.00305103	-0.000153217	0.0323798	-0.0135854	-0.000787552	-0.0021113	-0.00237002	-0.000379955	-0.00568258	0.0300007	0.000806558	0.0130816	-0.00681062	0.012642	0.0220389	-0.00823873	-0.00201736	0.421658	-0.00597349	0.0108078	0.000225437	-0.00278025	-0.00427595	-0.00241149	-0.00932689	-0.0149439	0.00524988	0.000970342	-0.00619065	0.0380704	0.25976	0.362808	-0.00517842	-0.00139192	0.0325183	0.00683825	-0.00224486	-0.00256736	-0.00705122
CG15514	0.065434	0.0269465	0.0372835	0.0359517	0.0256527	0.0709563	-0.00290905	-0.0034966	0.0937939	0.00746093	0.0119036	0.0862998	0.000615683	0.00914496	0.102064	0.0287832	0.0137388	0.094078	0.0659001	0.0380763	0.0141778	0.00473921	0.0343825	0.0259986	0.0123391	0.0883189	0.0220303	0.118911	-0.00432516	0.0352378	0.0103754	0.00189586	0.0219106	0.0173072	0.0111969	0.0334948	0.0108504	0.0633757	0.0140642	0.0364292	0.116273	0.0476728	0.115874	0.0221475	0.0561846	0.0373163	0.00404489	0.0883384	0.0638903
CG15601	0.198587	0.0235925	0.012283	0.010227	0.0183213	0.152078	0.0242579	0.00403694	0.0421438	0.0626888	-0.00475581	0.0490261	0.0098188	0.139178	0.0497549	0.0367702	-0.00476106	0.0140965	0.0807799	0.0345753	-0.00378022	0.00627245	0.0193564	0.098949	0.0201691	0.0523246	0.0303949	0.0225973	0.00714304	0.120497	0.00319445	-0.00201574	0.0112979	0.05237	-0.00335061	0.0872867	-0.000897993	0.0248861	0.0102732	0.00784821	0.0298064	0.00777601	0.108544	0.0221286	0.0253141	0.0928028	0.0643259	0.0619064	0.141063
CG15696	0.10947	0.0314047	-0.00435994	0.00864597	0.0312922	0.104047	0.0285459	0.00557521	0.00503985	0.0405168	-0.0041394	0.000700199	0.00304569	0.105509	-0.000468504	0.0337976	-0.00269997	0.00376487	0.0948303	0.0398359	0.00589876	0.0100804	0.0164749	0.0627241	0.0509098	-0.00589929	0.0548137	-0.0104223	0.106136	0.210151	0.00396704	-0.000787001	0.011017	0.0609363	0.00395806	0.0520483	-0.00814975	0.0346466	0.0156281	0.00825055	-0.000848884	-0.00809662	0.0491711	0.0259072	0.0207303	0.053067	0.117646	0.0115958	0.158852
CG15812	0.0149077	0.0723014	0.0397841	0.00425781	-0.00137691	0.00566812	0.00876138	0.00641905	0.0217032	0.00448255	0.00296104	0.0535451	0.00434134	-0.000102161	0.0269697	0.0563536	0.00159307	0.0168424	0.0295108	0.205694	0.0116523	0.0302067	0.00367116	0.0689951	0.00690778	0.0333913	0.00774811	0.0337651	-0.00186342	0.0109327	-0.00314459	-0.00630411	-0.0014376	0.0141838	-0.0135638	-0.00307373	-0.000592941	0.0155009	0.00699515	0.262293	0.0603758	0.0169301	0.0319556	0.0131586	0.0195333	0.039663	0.00641905	0.0291255	0.0266584
CG1602	0.0268722	0.0349666	-0.00514283	-0.00258422	0.0412012	0.0220547	-0.000728967	0.0287162	0.00250732	-0.00182836	0.0205948	0.00626981	-0.00215677	0.0414722	-0.00215677	0.0621	-0.00251397	0.0104779	0.0447132	0.0164556	-0.00184487	0.00796873	0.0659968	0.00436756	0.0607582	-0.00487832	0.0650632	-0.00360726	0.0491325	0.0836101	0.0159525	-0.00342724	0.00312992	0.0266092	0.00425452	0.0371293	-0.00399727	0.0578947	0.0112183	0.00888465	0.00034418	-0.00232931	-0.000918898	0.0471632	0.0341545	0.0127474	0.0287162	-0.00100208	0.0541122
CG1603	0.170804	0.093856	-0.00307262	0.0523654	0.085769	0.109205	0.0208222	0.015382	0.0447365	0.0318977	0.0329505	0.0195459	0.000365673	0.139455	0.0127513	0.0402032	0.00314709	0.0181854	0.0803728	0.252354	0.00115509	0.0112913	0.0714553	0.0767483	0.0255511	0.00218984	0.042614	0.0816066	0.0421216	0.227749	0.00739546	0.00440606	0.0203641	0.0659491	0.0136871	0.163733	0.00972956	0.0518607	0.0372156	0.219965	0.097875	0.0438555	0.0999042	0.0170733	0.0466168	0.106495	0.0587877	0.02314	0.0802352
CG1647	0.0314584	0.0112371	0.0130712	0.00920036	-0.00159299	0.0258912	-0.000640715	-0.000770123	0.0187496	0.0242007	0.0237333	0.0286373	0.0118253	0.0201969	0.0118253	-0.000724303	-0.00220962	0.026729	0.0380868	0.00430295	-0.00162152	0.00319985	0.0199754	0.00584126	0.0342934	0.0203831	-0.000692078	0.00509312	0.0140374	0.0300073	0.018865	0.00567587	0.00454014	0.0305099	-0.0019512	0.00746137	-0.00351334	0.0356392	0.0220756	0.0107063	0.01939	-0.00204731	0.0111546	-0.000477511	0.0256399	0.0149616	-0.000770123	0.0285569	0.0299211
CG16779	-0.0018866	-0.00716055	0.0598262	0.0134215	0.0207187	0.000220798	-0.00238022	0.00630175	0.045506	0.00539265	0.00285711	0.00197139	0.000427865	1.80561e-05	0.0228383	0.026534	0.00462756	0.00100515	0.00365634	0.0104311	0.00706145	0.0182528	0.0247251	0.00575738	0.00678796	0.027724	0.00762364	0.00171858	0.0188803	0.00114266	0.0199156	0.00772989	0.0261945	0.00545714	0.0213702	0.0041328	0.00730058	0.0129858	0.0112752	-0.00411453	0.020847	0.00277661	0.0312907	-0.00177393	0.00796818	0.0166654	0.00630175	0.0127548	0.00275152
CG16813	-0.0129112	0.0376273	0.0114841	0.0417851	0.00659403	-0.00566107	-0.00394594	0.0121862	-0.000608578	-0.00525057	0.0143256	0.00541412	0.209156	-0.0226715	-0.000173133	0.0195375	0.0140607	-0.00403823	-0.00305668	0.0423493	-0.00461384	0.0141702	0.0155351	0.0082999	0.0130632	-0.00779436	0.00201633	0.22846	0.0198422	0.0129381	0.0349491	0.0178625	0.025671	0.000158683	0.0106111	-0.0179271	0.0372745	-0.00894507	0.0103599	0.042993	0.202451	0.181346	-0.0143261	-0.00294083	0.0183621	-0.00413338	0.00654317	-0.0054243	-0.0112832
CG16815	-0.00375475	0.0255106	-0.00559143	0.0157469	0.0112198	-0.00338641	-0.000792553	-0.000952628	0.0016336	0.00527239	-0.00129474	-0.00310819	-0.0023449	0.0387356	-0.0023449	-0.00089595	-0.00273326	-0.00225316	0.0515572	0.0082564	-0.0020058	0.00661264	0.0061327	0.00345287	0.140759	-0.00530384	0.0597239	-0.00392192	0.0653623	0.0966728	0.0142099	0.0103278	0.00861234	-0.00102334	0.00970434	0.0369569	0.00170109	0.00214841	0.00972695	-0.00252553	-0.00435167	-0.00253249	-0.00613275	-0.000590673	0.0199283	-0.00194362	0.0262713	0.0227196	0.0231643
CG16863	0.0531145	0.0100049	-0.0048415	0.00827903	0.0287503	0.0327111	0.0748546	0.0306053	0.0239586	0.0310733	0.0220175	-0.00269132	0.0235939	0.0453664	0.0235939	-0.000775785	-0.00236667	0.0113787	0.0602191	0.0179451	0.0281869	0.0024696	0.0287483	0.0215009	-0.000792481	0.00116668	0.0342287	-0.00339591	0.0286539	0.0549219	0.00732891	-0.00322643	0.0184835	0.0576367	0.00941056	0.0326771	0.00321828	0.0401004	0.0437104	0.00971675	0.00123336	-0.00219283	0.0247801	-0.000511451	0.023682	0.0291925	0.0620354	-0.000943363	0.00747502
CG17186	-0.000476107	0.0230655	0.0119557	0.00248884	0.0156746	0.000571397	-0.00113236	-0.00136107	0.00217204	-0.00398507	0.0121975	0.00144529	0.00442791	-0.006836	0.00442791	-0.00128009	-0.00390514	0.00487319	0.00411991	0.0158297	-0.00286578	-0.00271707	-0.0041293	0.00973585	0.0384118	-0.00757784	0.020007	0.134932	-0.00541181	0.0441862	0.00171529	-0.000398608	0.00303631	0.0163024	-0.00128909	-0.00605383	0.0149824	0.00732145	-0.000751004	0.0180714	0.154006	0.0756577	0.00341632	-0.000843922	0.0200694	0.00659522	0.01772	0.0151311	0.0140578
CG17328	0.0664347	0.0311356	0.00900658	0.0502442	0.0660423	0.0265216	0.00737278	0.0218068	0.0461041	0.0241466	0.0630974	-0.00517082	0.00240242	0.081443	-0.000989834	0.023572	-0.0032329	-0.00394088	0.041496	0.0336767	-0.00268863	0.013833	0.136596	0.0139611	0.0402721	0.000713702	0.0249386	0.00538447	0.0867886	0.155505	0.0110389	0.0241619	0.0291524	0.0275972	0.0265911	0.0875678	0.013318	0.0826324	0.0411928	-0.0020698	0.0111602	0.00417616	0.0341084	-0.00195833	0.0364904	0.05078	0.0301285	0.00366579	0.0433824
CG17359	0.218438	0.0619507	0.0160983	0.0678998	0.0780843	0.195353	0.0201347	0.0100251	0.101879	0.0915415	0.0566878	0.0347076	0.0140349	0.251727	0.0473209	0.0330105	0.0116461	0.0654178	0.0898157	0.0303905	0.0228836	-0.000525392	0.107441	0.0571016	0.0161691	0.0566067	0.0690677	-0.00171261	0.0269481	0.246365	0.00905398	0.0043551	0.0212944	0.0750949	0.0165449	0.260648	-0.00030657	0.123573	0.0486289	0.00724918	0.00990184	-0.000557665	0.159783	0.0296325	0.0225108	0.094498	0.0559564	0.0341253	0.148479
CG17361	0.0601391	0.113229	0.00394578	0.0308196	0.0236164	0.0511091	0.00457441	0.00916052	0.0135302	0.0335543	0.0333552	0.0194083	0.0062192	0.182688	0.00353207	0.00322441	0.00230833	0.0463975	0.0656091	0.124107	0.0103566	-0.000596967	0.0445979	0.0241729	0.0235783	0.0090046	0.0330562	0.00285631	0.0392573	0.285002	0.0101697	0.00297914	0.00109241	0.00795216	-0.00231113	0.22463	-0.000784237	0.0664493	0.0346923	0.159101	0.0190122	0.00673258	0.0277417	0.0293863	0.044042	0.0403583	0.0157525	0.0299892	0.0654755
CG17385	0.0518888	0.0276109	0.0692963	0.0247708	0.0151395	0.0445861	-0.00207603	-0.00249534	0.0347778	0.0131606	-0.00339147	0.0338657	0.0109378	0.0319466	0.0365581	0.0310637	0.00384641	0.0296382	0.0393681	0.0153534	0.00970545	0.0398603	0.01326	0.0534432	-0.00239738	0.0417701	0.0210672	0.0437323	-0.00460043	0.0505782	-0.00129777	0.00916613	0.0186019	0.0168239	-0.00553197	0.0318726	-0.00440363	0.0279425	0.0212572	0.00925347	0.0621995	0.00919202	0.0424355	0.0153398	0.0195792	0.0720852	0.0184548	0.0429518	0.0257099
CG17568	0.171302	0.0441798	0.0310574	0.0114304	-0.00157698	0.164028	0.0210704	0.0365763	0.105627	0.0545465	0.00460476	0.124625	0.0206073	0.0819385	0.119666	0.0537218	0.00292414	0.0365218	0.105146	0.0321121	0.0238697	0.00594048	0.0216514	0.0785139	0.00325505	0.106785	0.0039835	0.0169866	-0.00188831	0.042678	-0.00178756	-0.00489705	0.0130147	0.0774809	-0.00943425	0.0621717	-0.00441006	0.0595111	0.016106	0.0458381	0.0184934	0.0125125	0.18584	0.0193306	0.0124536	0.101404	0.0635769	0.0663529	0.132515
CG17612	-0.00501887	0.00136021	-0.00571038	0.0619991	0.00779633	-0.00387102	-0.00173523	0.010412	0.0097297	-0.00551877	0.0247674	-0.00294987	0.00505514	-0.000559144	-3.94253e-05	-0.00196162	0.0903112	0.0109679	-0.00527971	0.00508797	0.00750719	0.0130835	0.0309516	0.0017719	0.0110039	0.00212794	0.012031	0.000618069	0.0107539	0.00226826	0.0764605	0.0208748	0.0231281	-0.00224053	0.0279051	-0.00214721	0.0543336	0.00826848	0.0383265	-0.00552945	0.00197636	0.00389609	-0.00146219	-0.00129323	-6.74614e-06	-0.0042554	-0.00208571	-0.00238535	0.00545643
CG17802	-0.00750034	0.102383	-0.0097308	0.0167527	0.00457124	0.00244029	-0.00213443	-0.00256553	-0.00953185	-0.00909147	-0.00348687	0.0104967	-0.00631508	-0.0184536	-0.00631508	0.0192627	-0.000220657	-0.00606799	0.00158896	0.471865	-0.00540183	0.00432334	0.00573068	0.0488108	0.00814494	-0.0105481	0.0203782	0.0169668	-0.00243313	0.00717057	-0.00492615	-0.00214142	-0.00633217	0.0257152	-0.0169594	-0.0146585	0.0041458	-0.00175554	-0.00275925	0.491229	0.0321522	0.000880111	-0.01001	-0.00159075	0.0103796	0.00477951	0.00762826	0.00598104	0.00173565
CG17829	0.0436313	0.103625	0.0342725	0.0187988	0.0532164	0.037676	0.0232405	0.0291909	0.0244345	0.0297044	0.0227041	0.0176957	0.00678772	0.173242	-0.00934579	0.00757091	0.0042416	0.0247736	0.0507863	0.0502841	0.0115663	0.0494359	0.0399839	0.0587092	0.0601846	-0.000451418	0.039782	0.0582471	0.0774022	0.358357	0.0153876	0.0106745	0.0152244	0.0264987	-9.08205e-05	0.145443	0.00729256	0.0540149	0.0400811	0.0367029	0.125266	0.0343987	0.010127	0.0152951	0.0554386	0.0292227	0.0348449	0.00447651	0.0629963
CG1792	0.105826	-0.00365626	0.0124448	0.0199603	0.0300597	0.0899262	-0.000659307	-0.000792471	0.0541177	0.0328058	-0.00107706	0.0276875	0.0247189	0.0393521	0.0780579	-0.000745321	0.0206398	0.0397459	0.0887823	0.0189691	0.0139036	0.00289401	-0.00240425	0.00550707	-0.000761361	0.0375465	0.0356843	0.00476849	0.0051581	0.0142161	0.018194	0.00534389	0.0195232	0.0600588	-0.00225462	0.015137	-0.00361529	0.0571866	0.0131142	0.0102882	0.00182559	-0.00210672	0.0679733	-0.000491368	0.0114328	0.0465855	0.0973443	0.0563117	0.102276
CG18011	0.00495436	0.0623051	0.00586713	0.0156979	0.0185774	0.0111756	0.0168606	-0.00170973	0.00557936	0.00135185	-0.00232373	0.0085011	0.00819505	0.00965994	0.00199326	0.0307422	-0.00490553	0.0217654	0.00170406	0.00289242	-0.00359991	0.00738207	0.0200248	0.00933703	0.0141922	0.00999521	0.0323184	0.0116367	-0.00679817	0.0106854	0.00419945	-0.00668758	-0.00028116	0.0123275	0.0114505	0.0172586	0.00233818	0.0101616	0.000668061	0.00699127	0.0363255	0.0069474	0.00598621	-0.00106011	0.00824806	0.0114571	-0.00170973	-0.00195536	-0.00537036
CG18262	0.141747	0.0755156	0.00434837	0.0273427	0.0334755	0.117172	0.02381	0.00956115	0.0229695	0.0589293	0.0238643	0.0194701	0.00996096	0.310345	0.00330208	0.0109962	0.00773893	0.0376688	0.0897163	0.0355115	0.0285057	0.0108001	0.053891	0.0829157	0.023245	0.0176592	0.0302625	0.00319194	0.0612365	0.495157	0.00562206	0.00828867	0.00698446	0.0497534	-0.00171183	0.311177	-0.00822622	0.0943938	0.0500049	0.0160677	0.0317504	0.000500977	0.0547851	0.0221341	0.0318096	0.0684197	0.0544832	0.0208252	0.108204
CG18476	0.0162433	0.00827543	-0.00278733	0.00146696	0.0136591	0.00937672	-0.00124955	-0.00150193	0.0198323	0.0148034	-0.00204131	0.000436792	0.00335585	0.0149707	0.0104087	-0.00141257	0.00780983	0.0257987	0.0236373	-0.00267859	0.00507388	0.00339368	0.0183807	0.0123243	-0.00144297	0.00431916	-0.00134973	-0.00618337	0.0116071	0.0279035	-0.0047732	0.00305702	0.00564103	-0.00161342	-0.00556752	0.0223542	-0.00685189	0.00947879	0.00255139	-0.00398179	-0.00351476	-0.00399277	0.00689524	-0.000931266	0.00339017	-0.00306434	-0.00150193	-0.0017177	0.00636463
CG18599	0.0944392	0.0238596	0.0617806	0.0541734	0.046407	0.0721022	0.0102056	-0.00103015	0.1051	0.00668665	0.0382659	0.0681337	-0.00838533	0.0760616	0.0891816	0.0111213	0.00273386	0.0973492	0.0716776	-0.0114989	0.0349509	0.00639557	0.0653436	0.0131082	-0.00775298	0.116955	0.0240778	-0.0237173	0.000993157	0.0694162	0.00666932	-0.00340044	0.0227085	0.0306544	0.022799	0.267613	-0.000850607	0.0854792	0.0481143	-0.0187277	-0.0353036	-0.0121468	0.195727	0.0403911	0.0305781	0.0596046	0.00600946	0.0338671	0.0885065
CG18764	0.102663	0.0296771	-0.00132432	0.0236459	0.0357347	0.129159	-0.000829836	-0.000997442	0.0126369	0.0387481	-0.00135564	0.00476732	0.00814507	0.0451179	0.00814507	-0.000938097	0.0244603	0.0196978	0.0593359	0.0789579	-0.00210015	0.000499519	0.0142111	0.0165745	-0.000958286	0.0230362	0.0569694	0.00227776	0.0092444	0.0424305	0.00506265	0.0095228	0.0139297	0.0473481	-0.00478329	0.0207321	-0.00455038	0.0498811	0.00893682	0.0662956	0.00836678	0.00717012	0.0516686	-0.000618459	-0.00244735	0.0235101	0.103019	0.0216016	0.130118
CG2116	-0.000433314	0.0481416	0.00489967	0.0122312	0.0135284	-0.00111496	-0.00221648	-0.00266415	0.00727877	-0.0115523	-0.0036209	0.0185817	-0.00255323	-0.0158259	0.0134652	0.0183835	-0.00420331	0.00203147	0.0166259	0.0804558	-0.000932956	-0.000844134	-0.0015708	0.0205853	0.0281147	-0.0148329	0.0194665	0.276039	-0.000611802	0.0377954	-0.00846678	-0.00534932	-3.91286e-05	0.0154301	-0.0116045	-0.00898374	0.0205776	-0.00252915	-0.00588654	0.100835	0.25577	0.222967	-0.00774592	0.0141854	0.0175673	-0.000610322	0.0169836	-0.00304689	0.00736297
CG2120	0.0428589	0.0369009	0.0316815	0.0899782	0.0727232	0.027223	0.0200077	0.0099338	0.148319	-0.00533868	0.0601182	0.0673186	0.00142809	0.0507485	0.0511409	0.0112128	0.0185769	0.123207	0.0812469	0.00677493	0.0468729	-0.0018106	0.12704	0.00479564	0.00547558	0.0784415	0.0404572	-0.00689231	0.00469916	0.0801261	0.0313844	0.00414899	0.0340677	0.0132185	0.040197	0.228699	0.00737718	0.122829	0.0494923	0.0051664	0.00299745	-0.00835945	0.0971625	0.0458581	0.076323	0.0365866	-0.000228969	0.0339228	0.0353962
CG2129	-0.00480257	0.00373862	-0.00715182	-0.00359372	0.00780084	-0.00433145	-0.00101373	0.0200839	-0.000894124	-0.00545412	-0.00165606	-0.00397559	0.0317354	-0.005764	-0.00299929	-0.00114598	-0.00349602	-0.00288194	-0.00308442	0.0190035	-0.00256555	-0.00597181	-0.0036967	-0.00469837	-0.00117064	-0.00288059	-0.00109499	0.251247	0.00597698	0.00491048	0.00287168	-0.00476605	-0.000289874	-0.00130892	-0.00172109	-0.00470985	0.00863645	-0.00038498	-0.0049343	0.0129054	0.177117	0.294459	-0.00444515	-0.000755511	-0.00298968	-0.00248602	-0.00121848	-0.00139353	-0.0038273
CG2199	0.0196397	0.0439231	0.050185	0.0120431	0.0210184	0.029719	-0.0012802	0.0278691	0.0212333	0.0483495	-0.00400165	0.0402711	0.017279	0.0740426	0.0045861	0.0139558	0.00671748	0.00617302	0.0250824	0.0111216	0.00530366	0.055228	0.0105249	0.0651016	0.00122233	0.0464282	0.0108871	0.023075	0.00711842	0.0832343	-0.00304195	-0.0069119	0.00998042	0.0104258	-0.00636774	0.0320044	-0.0222936	0.0237472	0.0166435	0.0267128	0.0670907	0.00889505	0.0253211	-0.00444006	0.0174467	0.00259577	0.0161924	0.0190423	0.0336015
CG2202	0.191459	0.0171264	-0.00490255	0.000158729	0.0210137	0.155931	0.0367316	-0.0024305	0.0125626	0.0759134	0.0046103	0.00533378	0.0115449	0.13243	0.0159267	0.0319999	-0.00320877	0.012487	0.113182	0.0409471	0.00511672	0.00813347	0.0104397	0.10318	0.0312292	0.0179831	0.0456563	-0.00208907	0.0449443	0.162932	-0.0043211	0.00436628	0.0121104	0.0974663	0.00227628	0.0603145	-0.00870037	0.0217697	0.0223413	0.00169876	0.0142657	0.00165883	0.0786895	0.0158224	0.0160157	0.0900787	0.148062	0.0160225	0.147286
CG2678	0.172211	0.0596168	0.0283225	0.0617904	0.0410667	0.153213	0.0146159	0.00595198	0.140461	0.0541723	0.0249031	0.102326	0.000817046	0.219886	0.106505	0.00713684	0.00890952	0.112097	0.109316	0.0043648	0.0358841	0.000611341	0.0728564	0.03697	0.00237034	0.134932	0.0406021	-0.015851	0.00883629	0.202997	0.0108196	-0.00312233	0.0184175	0.0474221	0.0112317	0.390069	-0.00221299	0.123353	0.0692877	-0.0111444	-0.0195023	-0.0127893	0.234463	0.0498436	0.0368349	0.0810306	0.0310425	0.0326888	0.127948
CG2712	0.082629	0.0924659	0.00215734	0.0342463	0.0513235	0.0768776	0.0300241	0.0184367	0.0325648	0.0387155	0.0419601	0.00537969	0.0155689	0.275402	-0.000130227	0.0151744	0.0023826	0.0397587	0.0601777	0.0500551	0.0156382	0.00231378	0.065876	0.0475845	0.039682	0.00303724	0.032431	0.0240821	0.0680869	0.459206	0.0186739	0.0077868	0.00827627	0.0163576	0.00601108	0.282707	-3.70301e-05	0.0925376	0.0444483	0.0361152	0.0555017	0.0268437	0.0267204	0.0120286	0.0373622	0.0452551	0.0232507	0.00618775	0.0856031
CG2889	0.00896904	0.00010693	-0.00761227	0.0640508	0.0129983	0.00122057	-0.00226597	-0.00272364	0.0214409	-0.00507447	0.038764	-0.00295523	-0.00670426	0.000934368	-0.00278528	-0.00256159	0.0157547	0.00578989	0.00454056	0.00557002	-0.00573473	0.00457912	0.0427182	-0.00798565	0.00738944	-0.0028328	-0.00244762	-0.0041323	0.0257999	0.00492439	0.0461292	0.0513842	0.0354333	-0.00292581	0.0505802	0.0153786	0.0665863	0.0282081	0.0129569	-0.00357962	-0.00521631	0.00365285	0.000874063	-0.00168878	0.0129745	-0.00555695	0.00689022	-0.00311492	0.0037608
CG30020	-0.0117641	0.0609262	-0.00605847	0.0155143	-0.00260604	-0.00604126	-0.00350641	0.00839985	-0.00821858	-0.0194966	-0.00572817	0.0134878	-0.00523217	-0.0318935	-0.00780324	0.022859	-0.00767454	0.00608115	-0.00816807	0.345337	-0.00587158	-0.0102012	0.0018463	0.062996	0.0156446	-0.0176866	0.00323008	0.106526	-0.0103497	0.0402472	-0.00740386	-0.00671732	-0.0108599	0.0130886	-0.0294503	-0.0299249	-0.00101459	-0.00525236	-0.00919911	0.34236	0.126802	0.0578806	-0.0231069	-0.00261325	0.010293	0.00379288	0.00209262	0.000695989	-0.00717839
CG30403	0.0724049	0.0709201	0.00880388	0.049944	0.0857706	0.0451	0.0571028	0.0133987	0.0823489	0.0250609	0.056686	0.0100963	0.012456	0.139426	-0.00105416	0.0146344	0.0141123	0.0698036	0.106947	0.016331	0.0209298	-9.78422e-05	0.111204	0.0159619	0.0400706	0.0142195	0.0801181	-0.00695867	0.0315819	0.207912	0.0135256	0.00897734	0.0269675	0.0120198	0.039001	0.202453	0.000250077	0.110955	0.0367667	0.0198314	0.00877344	-0.00217501	0.0298148	0.0514625	0.0667584	0.0830604	0.00511308	0.003618	0.0457602
CG30431	0.0267768	0.0251647	-0.00843012	0.0327511	0.0496112	0.0256628	0.0422779	0.0166514	0.00937213	0.00845932	0.0113639	-0.00468618	0.00383785	0.05255	-0.00353538	-0.00135081	0.00854873	0.00427401	0.0465641	0.0309278	-0.00302411	0.0116995	0.0196219	-0.000803506	0.0550974	-0.0046822	0.0188341	-0.00591302	0.0815821	0.106752	0.0011618	-0.000949169	0.00224626	0.0152967	0.0091884	0.0484683	0.00148304	0.0398364	0.0257738	0.00304265	-0.00948347	0.0030135	0.0138426	-0.000890549	0.0334596	0.0681434	-0.00143627	-0.0016426	0.0244528
CG3065	-0.002203	0.00322506	0.0215168	0.00626718	0.0123281	0.00344126	-0.00133875	-0.00160914	-0.000257863	0.00525994	-0.00218701	0.00970209	0.00262532	0.0128347	-0.00396091	-0.0015134	0.0067004	0.00304634	0.00233262	0.0150848	-0.00338811	0.0188953	0.00047303	0.0149417	0.0152704	-0.00303788	0.0345074	0.0132085	0.0141217	0.0169089	-0.00511391	0.00204673	0.00437399	-0.00172858	-0.000663873	0.00150861	0.00342555	0.000460714	0.00154603	0.0263298	0.00736348	0.00792723	-4.69744e-05	-0.000997739	0.002659	0.00465287	0.0145479	-0.00184031	0.00529466
CG31224	0.0186925	0.00827385	0.0490332	0.037804	0.0110049	0.00706926	-0.00198225	-0.00238261	0.0350246	0.0153821	0.0451815	0.012515	0.0075405	0.00425669	0.0209458	0.00941347	0.0123595	0.0129604	0.0200455	0.0145676	0.0106379	0.0201204	0.0291023	0.00802897	0.0205291	0.0389583	0.0100552	0.00364682	0.0044481	0.00035366	0.0271315	0.0189748	0.0230193	0.00764592	0.0199726	0.0136414	0.0183487	0.0251589	0.00949614	-0.00631658	0.00696172	0.00194652	0.0406321	-0.00147733	0.00311933	0.000522989	0.00857917	0.0164487	0.0170907
CG31365	0.103971	0.0406887	0.0257145	0.00884868	0.016526	0.0728544	0.0152945	-0.00185769	0.0316743	0.0198076	-0.00252482	0.0241982	0.0239888	0.0152949	0.0696872	-0.00174716	-0.000422226	0.00154925	0.0730807	0.0046223	0.00275933	0.0141235	0.0129416	0.0148455	-0.00178476	0.0307409	0.0606962	0.0129939	0.0104106	0.0211394	0.00296895	-0.00364925	0.0083491	0.0110506	0.0100415	0.0303534	0.00397569	0.0178666	0.0134548	0.00568949	0.0222176	0.00564701	0.0841875	-0.00115185	0.0240945	0.0788049	0.0261687	0.0346417	0.097387
CG31388	-0.000901289	-0.00105502	-0.00134217	-0.000674425	-0.000472999	-0.000812873	-0.000190244	-0.000228669	-0.00105011	-0.00160995	-0.000310788	-0.000746091	-0.00056287	-0.00285139	-0.00056287	-0.000215064	-0.000656091	-0.000540847	-0.000578846	0.0249274	-0.000481471	-0.00112072	-0.000693752	-0.000881732	-0.000219692	-0.00127313	-0.000205495	-0.000941416	-0.000909224	-0.00218505	-0.000726718	-0.000894433	-0.000989389	-0.000245642	-0.0018612	-0.00295012	-0.0010432	-0.00099872	-0.000926009	-0.000606227	-0.00187647	-0.000607898	-0.00147211	-0.000141785	-0.000561067	-0.000466545	-0.000228669	-0.00026152	-0.000718261
CG31441	0.100021	0.0983561	-0.00326691	0.030196	0.0336169	0.099586	0.0225213	-0.00371994	0.0330982	0.0405103	0.057715	0.00320573	-0.00336383	0.240465	0.00822186	-0.00349862	0.00674633	0.0424297	0.0807319	0.0226032	0.0124619	-0.00203715	0.0687823	0.0209944	0.0260073	0.00923413	0.0757132	-0.011826	0.0429626	0.317037	0.012922	0.0111259	0.00883159	0.0158492	0.0025292	0.29354	0.00196857	0.0874918	0.0416649	0.00628413	-0.00610388	-0.00720548	0.0508794	0.0664216	0.04608	0.0796599	0.0318069	0.0206021	0.104371
CG3163	0.0073108	0.00071648	0.098885	0.00702211	0.0116889	0.010414	-0.00239575	-0.00287963	0.0209362	-0.0109258	-0.00391376	0.0214993	-0.00337677	0.0261598	0.0188919	0.00697167	0.00130407	0.012496	-0.00728941	-0.00439213	-0.00606317	0.0330492	0.00333399	0.0103457	-0.00276658	0.0240073	-0.0025878	0.0440265	-0.00682454	0.00381636	0.00526064	-0.0065634	0.0130934	0.00538313	-0.00358662	0.0138282	-0.00706989	0.0148531	0.00424017	0.00615878	0.0679345	0.0129779	0.0352144	-0.0017855	0.0189974	0.020957	0.0153299	-0.00329332	0.0113664
CG32532	0.0165012	0.0285381	0.0862847	0.0875219	0.0492048	0.00987966	0.00355545	-0.00442554	0.136518	0.0289103	0.0870923	0.0580148	0.00629138	0.0365235	0.0210213	0.00864365	0.029487	0.0584948	0.0174507	0.00249889	0.0279516	0.028224	0.138272	0.0113114	0.0020164	0.0812999	0.0295266	0.00543707	0.0129981	0.0352648	0.0412277	0.00756166	0.0555033	0.0120666	0.081386	0.0954265	0.0119158	0.106283	0.0602136	-0.00717083	0.0173505	-0.000391564	0.117575	0.00696488	0.0507116	0.0471743	0.00761938	0.0265409	0.0343186
CG32767	0.00612136	0.04106	0.0778207	0.0529525	0.00995041	-6.09209e-05	0.0229487	-0.00250953	0.034456	0.015946	0.0119269	0.00145221	0.00231544	0.028653	0.0150544	0.0197899	0.00739291	0.0161538	0.00603775	0.0294568	0.00463372	0.0869858	0.0441738	0.036678	0.019273	0.0604698	0.020925	0.0203574	0.0164812	0.0303708	0.0151096	0.0224496	0.0256862	-0.00269581	0.0103028	0.02595	0.0186312	0.0421495	0.0236247	0.0209634	0.0602981	0.005132	0.0436816	-0.00155602	0.0321814	0.0204626	0.00790739	0.00624022	0.0221429
CG32772	0.0115513	0.019062	0.0347302	0.117515	0.0508728	0.000921376	-0.00258716	0.0137866	0.0360613	0.0301505	0.057968	0.00549025	-0.00421077	0.0427489	0.00267681	0.00605721	0.041377	0.00339364	0.0155749	0.0152697	-0.00252599	0.0302708	0.0857651	0.0145459	0.00580526	0.0120987	0.0254043	-0.00243212	0.0434281	0.0434368	0.0703544	0.042352	0.0300135	-0.00334053	0.0418676	0.0544862	0.0571213	0.0373219	0.0506413	0.00455412	0.0131983	-0.00188518	0.0244648	0.0116913	0.00618902	0.0102535	-0.00310971	0.0112205	0.0172887
CG3281	0.0849504	0.0344017	0.0418647	0.0329111	0.00945611	0.0848479	-0.00264414	0.00509312	0.155175	0.0285789	0.0200375	0.132516	0.00903537	0.0533694	0.154019	0.0233925	0.0198497	0.160862	0.113293	-0.00268744	0.0208702	0.0101306	0.028737	0.0158914	-0.00305343	0.136897	0.0247525	-0.000900516	-0.00423318	0.0430875	0.0160854	-0.00602652	0.0152659	0.0350888	0.0176262	0.109335	-0.00531287	0.0915459	0.0345945	0.00723724	-0.00396846	-0.00532491	0.190706	0.064701	0.0632333	0.0585183	0.0133644	0.0470018	0.103924
CG33213	0.0519314	0.123496	0.000568768	0.0275255	0.0316155	0.0591687	-0.00175275	0.0102677	0.0258288	0.0142081	-0.00286335	0.0122124	0.00994707	0.0109782	0.00994707	0.0111748	0.00695696	0.0370016	0.0535417	0.183377	-0.00443588	-0.00519742	0.0346212	0.0372245	0.0494935	0.00187514	0.025643	0.0520865	0.00105269	0.0334432	0.0128925	-0.00185244	0.0169315	0.0438192	0.00983296	0.0101282	0.0123779	0.0338147	-0.00235665	0.24749	0.0567502	0.0177684	0.0318506	0.0186428	0.0454345	0.0200137	0.0721399	-0.00240943	0.0528289
CG33557	0.119912	0.0215768	0.00610679	-0.000676296	0.0192693	0.114625	0.0100587	-0.0025759	0.0105797	0.0593077	0.00397398	0.00725624	-0.00220163	0.130585	-0.00220163	0.0407575	0.00327746	0.00251982	0.0900958	0.0513893	-0.00542366	0.0168286	0.00228066	0.141562	0.0292289	0.002403	0.0202793	-0.00561933	0.0593923	0.146714	-0.00818632	-0.00221315	0.0149763	0.0634034	0.00117222	0.0481089	-0.00273007	0.0240455	0.0174351	0.035471	0.0215166	-0.00301284	0.0514622	0.047509	0.00198404	0.0845136	0.0888061	0.00593398	0.128485
CG3407	0.302622	0.00969775	0.0108195	0.0229199	0.00960547	0.214162	0.0318704	-0.00187185	0.0313082	0.062302	-0.00254407	0.0110542	0.02374	0.108412	0.0350791	0.0130264	0.00924248	0.0132683	0.105548	0.0394978	-0.00394126	0.00523479	0.0127595	0.0801572	-0.00179837	0.0278058	0.0137925	-0.00429176	0.0208193	0.0994552	0.00285748	0.00344817	0.00491227	0.0886288	-0.00274891	0.0621117	0.00381782	0.0401724	0.0305908	0.000304975	0.000574323	-0.00497617	0.125541	-0.00116063	0.0181575	0.125977	0.0954857	0.0221865	0.172293
CG34224	-0.00393927	0.0109889	0.0813882	0.013346	0.00554643	-0.00652297	-0.00263001	0.00515326	0.022183	0.00945162	-0.00429645	0.0435473	0.117622	-0.00997454	0.00577584	0.0147064	0.00257778	0.0172065	-0.00140915	0.00506289	0.00521788	0.0482484	0.00694336	0.0161038	0.0402316	0.0296287	-0.00284084	0.409524	-0.00412178	0.021481	-0.0021497	-0.00592665	0.0116017	0.00434489	-0.00333607	0.00218941	0.0169745	0.00738868	-0.000354789	-0.00208283	0.295826	0.296212	0.0141426	-0.00196009	0.0126442	0.00171802	-0.0031612	-0.00361535	-0.00460386
CG34376	0.0269769	0.010964	0.0980197	0.0178564	0.00320792	0.0469285	-0.00452367	0.0144521	0.108914	-0.00327365	0.00359182	0.16479	0.00891214	0.000432789	0.164986	0.0371782	0.00181394	0.0651654	0.0177792	-0.00809945	0.0287908	0.00941073	-0.00166421	0.0297952	-0.00522389	0.279508	-0.00488631	0.00325042	-0.0102527	-0.000621593	-0.00153825	-0.0174177	0.00205842	0.00341758	-0.00535435	0.000953298	-0.0126562	0.0580677	0.0226428	-0.00876544	0.0231108	-0.00130833	0.167313	0.0367088	0.0293599	0.0353101	-0.000464973	0.0546628	0.0705069
CG3726	-0.00149808	-0.00142967	-0.0021575	0.0281324	0.00579636	0.000858431	-0.00259435	-0.00311834	0.00799366	0.000289979	0.0205726	-0.00497627	-0.000806784	-0.00531755	-0.000806784	0.0060249	0.0323644	-0.000228987	0.0121494	0.0151534	0.00546658	0.00566568	0.0184638	0.00782485	0.0057733	-0.00655471	-0.00280233	-0.0024956	0.0261228	0.00480934	0.0541067	0.0312977	0.0357706	-0.00334981	0.0459389	-0.00466769	0.0288178	0.0137164	0.0146998	-0.00826708	0.000152348	-0.0051076	0.00412377	-0.00193351	0.00268516	0.0101912	0.0137325	-0.00356633	0.00369691
CG3838	-0.0024413	-0.00285771	0.0182301	0.0266912	-0.0012812	-0.00220181	-0.000515311	-0.00061939	-0.00284441	0.0140493	-0.000841826	0.0108852	-0.00152463	0.0145008	-0.00152463	0.0438988	-0.00177714	-0.00146498	-0.00156791	-0.00273857	-0.00130415	0.00563314	-0.00187915	0.00856324	-0.000595076	0.00421777	-0.000556621	0.0488075	-0.0024628	0.0173039	0.0112769	0.00837643	-0.00267994	-0.000665366	-0.0050414	0.0208409	-0.00282569	-0.00270521	-0.00250826	-0.00164207	0.0428517	0.0299578	0.00268831	-0.00038405	0.0155894	0.0192861	-0.00061939	-0.000708373	-0.00194554
CG3847	0.00635308	0.0647253	0.0299285	0.102653	0.0372044	0.00494897	0.0171002	-0.00319791	0.0833008	0.00401611	0.0259178	0.0276099	0.0122375	-0.00857659	0.00888598	0.00573362	0.0138608	0.0273055	0.0179832	0.00657125	0.00109443	0.0132873	0.093847	-0.00157018	-0.00307237	0.022872	0.0428653	0.0433526	0.0311408	0.0260307	0.0497041	0.0299355	0.0592337	0.00421922	0.0456769	0.0458561	0.051156	0.035573	0.00346058	-0.00225031	0.072143	0.0318685	0.0240171	0.0112717	0.0762089	0.00559049	-0.00319791	0.0179143	0.0110205
CG3995	0.00338798	0.0431646	0.0178037	0.0209013	0.0199605	0.00283473	-0.00209372	-0.0025166	0.018248	0.000566469	-0.00342035	0.033448	0.00227465	-0.00838825	0.0107439	0.00867765	5.59339e-05	0.0116705	-0.00637044	0.10068	0.00459152	0.000580598	0.0199088	0.0338038	0.0408307	0.0126377	-0.00226156	0.0840029	-0.00472906	0.0243875	-0.00470907	-0.00448084	-0.00117036	-0.0027034	0.00216657	-0.00204234	0.0208235	-0.00136158	-0.00500741	0.150702	0.10498	0.0717822	0.0235805	-0.0015604	0.0575472	-3.20908e-05	0.00787162	0.0243774	0.0153841
CG42726	-0.0062248	0.0593633	0.0366696	0.0482616	0.0144626	-0.00616575	-0.0029326	0.0338905	0.0184946	0.00152517	0.0172451	0.0138912	0.177397	-0.014804	0.000474568	0.0125965	0.0187151	0.00118371	-0.00595598	0.018687	-0.00385964	0.0292388	0.0389085	0.00991348	0.0044019	0.0160254	0.0218099	0.0975537	0.018297	0.0252978	0.0385476	0.0151851	0.0215013	-0.00378656	0.0365724	0.00157995	0.0271353	0.000212436	0.00066182	0.00199134	0.115871	0.0697672	0.0131281	-0.00218561	0.0188922	-0.00351626	0.0114413	-0.00403131	-0.00148569
CG42741	-0.0111074	0.0423091	0.0908924	0.0325347	0.0119406	-0.00368979	0.00817832	0.0104075	0.0427214	0.0100085	-0.00704376	0.0744657	0.0762149	0.00346744	0.0147819	0.0117008	0.00151055	0.0230053	0.00748486	0.0401572	-0.00596451	0.021977	0.0118343	0.0357883	0.038291	0.0558939	0.00112461	0.411167	-0.0100469	0.0404731	-1.8395e-05	-0.0149061	0.0103919	-0.000729156	-0.00419171	-0.00374335	0.0283005	0.0195161	-0.00802147	0.0374323	0.424525	0.278679	0.021363	0.00516427	0.0446623	0.0123986	0.0104075	0.00316259	0.00202874
CG4282	0.0151632	-0.00339265	0.020247	0.00984477	0.0155577	-0.00261397	-0.000611771	0.0345142	0.0199619	0.0155041	-0.000999407	0.00847451	-0.00181003	0.00955517	-0.00181003	-0.000691584	-0.0021098	-0.00173921	-0.0018614	-0.0032512	-0.00154827	0.00369975	-0.00223091	-0.0028354	0.0359814	0.00882399	-0.000660814	-0.00302733	-0.00292381	0.00862588	-0.00233692	-0.00287624	0.0133065	0.0320273	-0.00598509	0.00873183	0.00447507	0.0376332	0.00581694	-0.00194945	0.00294044	-0.00195483	0.000890613	-0.00045594	0.0126106	-0.00150028	-0.000735334	-0.000840974	-0.00230972
CG4328	0.058712	0.0382606	0.00234712	0.0136118	-0.00218642	0.0658252	-0.000879395	-0.00105701	0.0168126	0.0213574	-0.0014366	0.0344064	-0.00260184	0.0172398	0.037417	0.0250996	-0.00303275	0.0079088	0.0362477	0.000946823	0.0094578	-9.51594e-05	-0.00320684	0.0408952	-0.00101552	0.106545	-0.000949892	0.00167382	-0.00420284	0.0116962	0.00441079	0.00220054	0.00116668	0.0217141	0.000840045	0.0223041	-0.00482213	0.0124468	-0.00428043	0.0250834	0.00694798	-0.00280998	0.0441052	0.038911	-0.00259351	0.0340083	-0.00105701	0.0846493	0.0752826
CG43347	0.0449228	0.0872709	0.0222962	0.0589373	0.066528	0.0265003	-0.00149341	0.0127023	0.0781449	0.00649981	0.0615969	0.0567527	0.00740079	0.0276727	0.0369491	0.0291382	0.0100818	0.0756832	0.0644308	0.0451807	0.0238254	0.000213876	0.105066	0.0044629	0.0133643	0.0404783	0.0629071	-0.000271749	0.00759219	0.0440033	0.00806422	0.0229148	0.0295298	-0.00192829	0.0523265	0.0904837	0.00791179	0.072793	0.0216674	0.061128	-0.00365705	-0.00477198	0.0855993	0.0222583	0.0370951	0.0675448	0.0127023	0.0613413	0.0407913
CG4360	0.0128573	0.0206163	0.089987	0.052017	0.00186919	0.0198835	0.00817832	0.00521083	0.0174892	0.0412604	-0.00321799	0.0135489	-0.00640184	0.0425742	-0.00216509	0.0227509	0.00515062	0.00537374	0.013666	0.00326636	0.00393075	0.0672006	-0.00366684	0.048031	0.0112472	0.0139958	-0.00465738	0.0207657	0.00315306	0.0566262	0.00162681	-0.00417521	0.00309959	0.0186233	-0.00619123	0.0410217	-0.00863725	0.0171075	0.0205032	3.74406e-05	0.066627	0.0176272	0.0230214	0.00516427	0.0191608	0.00729361	0.0363911	0.0167972	0.0170076
CG43689	0.0319743	-0.00724581	0.00808279	0.068702	0.02081	0.0178803	-0.00130658	-0.00157048	0.0147058	0.0107929	0.0100508	-0.0051241	0.0163756	0.000932086	-0.00386575	-0.00147704	0.0534629	0.00330517	0.0222743	0.00821744	-0.00330671	0.0025915	0.0500931	-0.00605568	-0.00150883	0.000354885	0.0170046	-0.00240203	0.0273894	0.00336756	0.0683697	0.0323078	0.043529	-0.00168706	0.0169373	0.00825448	0.025924	0.0123199	0.0225478	-0.00416352	-0.000245079	-0.004175	0.013659	-0.00097377	-0.00385337	0.00492561	0.0480848	-0.0017961	0.0109698
CG4404	-0.00626532	0.0199068	-0.00669316	0.0777087	0.0258889	-0.00467056	0.00889538	0.0252265	0.00155702	-0.0115205	0.0168246	-0.00914961	-0.0069027	0.0204556	-0.0030939	-0.00263741	0.0115884	-0.00663263	0.00771955	0.0175563	0.00743913	-0.00212794	0.0410403	-0.0034757	0.0362052	-0.0104767	0.00787583	0.00221844	0.119382	0.0976731	0.053207	0.066207	0.0293865	-0.00301241	0.0646559	0.0233816	0.10343	0.0223978	0.00962491	-0.0074344	-0.000412307	-0.000396776	-0.00612598	-0.00173877	0.019866	0.00804657	0.0158829	0.00496444	0.0181234
CG4424	0.0460704	0.0494214	-0.00371801	0.0229199	0.0500376	0.0367206	0.0151566	-0.00187185	0.00982127	0.0113014	0.0384123	0.00247338	0.00106194	0.0751656	0.00673146	-0.00176048	0.00437143	0.0309639	0.0393763	0.0172033	0.00930034	-0.000528738	0.0404173	0.0182666	0.0416289	0.0074178	0.0447417	0.00253734	0.0314176	0.150406	0.0116638	0.00703813	0.00165945	0.0368348	0.00438631	0.10045	-0.00853948	0.0466188	0.0167104	0.00557244	0.00588593	0.000276952	0.0167995	0.0436827	0.0409079	0.0303378	0.0259446	-0.00214077	0.0431178
CG4617	-0.00996069	0.0974421	0.00138751	0.017228	0.00981028	-0.00605045	-0.00210251	0.00781845	0.00666086	-0.0086877	-0.00343471	0.0364341	0.00221391	-0.0260169	-0.00200336	0.0306209	-4.22004e-06	0.0159609	-0.00229535	0.187831	-0.00532103	-0.00166774	-0.00766708	0.0417088	0.0514109	-0.0140702	0.0207505	0.15215	-0.00479271	0.074621	-0.00475613	0.000796616	-0.00367553	0.0165487	-0.0152617	-0.0165623	0.0137489	-0.00144721	-0.00765267	0.244065	0.242664	0.12223	-0.0113168	0.0151114	0.0318756	-0.00515608	0.00781845	-0.00289022	-0.00131128
CG4707	0.229485	0.0134615	0.0182886	0.00978789	0.0127918	0.191534	0.0554562	-0.00218902	0.0241347	0.0579939	-0.00297515	0.0259393	0.0140408	0.10246	0.0334699	0.0359466	-0.0021075	0.00998298	0.0794965	0.0203365	-0.00460908	0.0213673	0.0131049	0.0851308	0.0102988	0.0205632	0.0112905	-0.00608672	0.0155092	0.0796135	-0.00318447	0.00066461	0.00724949	0.0974895	0.00510662	0.0528466	-0.00469297	0.034622	0.0297837	-0.00129053	0.00934061	-0.00131881	0.0942811	0.0370616	0.00924723	0.135998	0.128883	0.0183385	0.138138
CG4730	0.00372824	0.0134465	-0.00577736	0.0722046	0.0237959	0.00156715	-0.00152169	-0.00182904	0.03557	0.00382094	0.0394194	-0.0015779	-0.00450219	0.0137288	-0.00450219	-0.00172021	0.00471999	0.00170917	-0.00462997	0.0114655	0.00292309	0.00282994	0.0604809	0.000397304	-0.00175724	-0.00496822	0.0141895	-0.00753003	0.025259	0.0156972	0.0482493	0.0369234	0.0320244	-0.0019648	0.0325664	0.0242104	0.0295867	0.0249903	0.0245476	-0.00484898	-0.00232825	-0.00486235	0.0154729	0.0218071	-0.00448777	0.00325793	-0.00182904	0.0103537	0.00792742
CG4820	0.0416273	0.0392256	-0.00283763	0.0273107	0.019445	0.0214501	0.0531812	0.0213738	0.00962395	0.0150173	0.0150175	-0.00375879	-0.00283573	0.0654056	0.015529	0.0228654	-0.00330538	0.0163818	0.0149458	0.036173	0.0190205	0.00368848	0.0412994	0.00145421	0.0223382	-0.00228646	0.0992158	-0.00474284	0.0583578	0.099019	0.00347016	0.00712248	0.0108203	-0.00123754	0.00795763	0.0646936	-0.00525562	0.0367307	0.00095495	0.00547704	-0.00371848	-0.00306258	0.00336635	0.0355999	0.0248083	0.0640342	0.0213738	-0.00131753	0.018024
CG4854	0.0723672	0.0161939	0.00999198	0.00993689	0.0168635	0.103977	0.0231461	0.039017	0.0430084	0.0264008	-0.00175099	0.0268798	0.0296887	0.0374603	0.0461187	0.0202142	0.0104196	0.0567807	0.0526697	0.00814846	0.0164741	0.00621267	0.00944983	0.0266833	-0.00123775	0.0408324	-0.00115777	0.00459122	-3.70962e-06	0.021247	0.00866576	0.0001625	0.0227053	0.0736643	0.00243738	0.00594657	-0.00140105	0.036406	0.00986705	0.00421692	0.00482071	0.0117984	0.0688805	-0.00079882	0.0133213	0.00726996	0.0188643	0.0161514	0.0475867
CG4936	-0.00537165	0.0331634	0.0663371	0.00920495	0.0138988	-0.00741725	-0.00371645	0.0194115	0.0163761	0.0062008	0.00271829	0.0204137	0.122844	-0.00972189	-0.00126192	0.0211859	0.00181834	0.00209325	-0.00184045	0.017159	-0.00372208	0.0399518	-0.00168137	0.0421547	0.0640539	0.0145081	-0.00401438	0.391972	0.0034667	0.0467791	0.000922722	0.00255847	0.00161464	-0.00479866	-0.0118583	-0.00672207	0.0194007	0.00262503	-0.00766375	0.0198097	0.435268	0.310551	-0.00399201	0.00685398	0.0403049	0.00847883	0.00747221	-0.00510882	0.00126359
CG5180	0.0788629	-0.00134008	0.0729813	0.0134708	-0.000715015	0.0821447	0.00551849	0.0106056	0.0209045	0.0473995	0.016034	0.0188236	0.00547773	0.0634382	0.0200519	0.011729	-0.00309	0.0276504	0.0331711	0.00494768	0.00583466	0.029299	0.00300789	0.0400307	0.0113342	0.0554192	0.0125908	0.0111184	0.00165268	0.036129	0.00410198	0.00769342	0.00575122	0.0293159	-0.00348274	0.0681233	-0.00732916	0.0335733	0.0260682	0.00103539	0.0388556	0.00367964	0.0800365	0.00923615	0.0143257	0.0451428	0.0106056	0.00202724	0.0319035
CG5245	0.0479159	0.0342594	0.00282442	0.0401742	0.0101639	0.0179203	-0.000851426	-0.00102339	0.000894333	0.0188193	-0.00139091	-0.00333908	-0.00251909	0.0343631	-0.00251909	0.0259855	0.014818	0.0190788	0.0275578	0.030301	-0.00215479	0.0107397	0.0472993	0.0093234	-0.000983219	-0.00105338	0.0272817	-0.00421325	0.0152454	0.0577515	-0.00325238	-0.00400298	0.00742809	0.0224984	0.0176771	0.0304648	-0.00466877	0.0190264	0.00217968	0.00688643	-0.00194467	0.00685281	0.0055448	-0.00063455	0.00785419	0.0228113	0.04967	-0.00117042	0.029256
CG5953	0.0381237	0.00717979	0.010673	0.0128701	0.0286885	0.0342536	0.025714	-0.00227228	0.0529358	0.0395952	0.0138225	-0.00387091	0.0178161	0.030642	-0.00559323	0.0222849	0.00152542	0.00436759	0.0215703	0.0188845	0.0116179	0.0174205	0.0806582	0.0243088	-0.00218308	0.00628977	-0.002042	0.00192404	0.00263442	0.0152623	0.00368693	0.0148286	0.0116578	-0.00244095	0.0183317	0.0142166	0.0202476	0.0326629	0.013723	-0.00167422	0.0135198	-0.00604067	0.0403505	0.0171068	0.031999	0.0404945	0.0551545	0.0174907	0.0186111
CG6254	0.0472717	0.0120767	0.00926911	0.00146696	0.0136591	0.0584294	-0.00124955	-0.00150193	0.00455826	0.019879	0.0106961	0.000436792	0.0104087	0.047138	-0.00369702	0.0169823	0.00175026	0.0257987	0.0373569	0.0210937	0.00507388	0.00697859	0.0929274	0.0666715	-0.00144297	0.0106598	-0.00134973	0.0193027	0.00281756	0.0836037	-0.0047732	0.00752292	0.00564103	-0.00161342	0.00108962	0.0283158	0.00083433	0.00947879	0.00686817	0.022229	0.0339285	0.0025421	0.0455452	0.0269612	-0.00368518	0.0224303	0.0504034	0.0134138	0.061776
CG6272	-0.00468077	0.0155624	0.00134481	0.0559165	0.019794	-0.00313782	-0.00210543	-0.00253067	0.00205952	-0.00266322	0.0117724	-0.00825696	0.0148283	-0.00960392	-0.00622926	-0.0023801	0.0253046	0.00277775	-0.00640607	0.000640319	-0.00532843	0.00472249	0.0402609	-0.00164495	0.00832178	-0.00273102	0.020716	-0.00534573	0.0319258	-0.00239046	0.0573738	0.200775	0.0277114	-0.00271852	0.0416806	0.00205987	0.0458265	0.000918691	0.0129512	0.00111663	-0.0102451	0.00497903	0.00349049	-0.00156913	0.00646552	-8.86546e-05	-0.00253067	-0.00289423	-0.00464015
CG6654	0.00363387	0.0381716	0.00153942	-0.000597911	0.00305598	0.0175459	-0.00152968	-0.00183863	0.00405424	-0.0108684	-0.00249893	0.00710229	-0.00452581	0.0109136	-0.00452581	0.0133221	-0.000317223	0.00165527	0.00657159	-0.00812932	-0.00387132	-0.000211359	-0.00557818	0.000321782	-0.00176646	0.00273358	-0.00165231	0.00285725	-0.00731071	0.0091477	-0.00136137	-0.00353763	0.00197766	-0.00197511	-0.00588668	0.0238394	-0.00209882	0.00509297	0.00315074	-0.00487443	-0.000670371	0.000459184	0.00171682	-0.00114004	-0.00451132	-0.00375131	0.0123183	-0.00210278	-0.00577525
CG6683	0.0300853	0.00458277	0.03248	0.0119565	0.019445	0.0214501	-0.000958448	0.0213738	0.0543671	0.0150173	-0.00156575	0.0448823	0.0338938	0.0155488	0.0522585	-0.00108349	0.012473	0.0641483	0.0417389	0.0103814	0.00829743	0.0130231	-0.00349511	0.0191433	0.0223382	0.0802647	-0.00103528	0.0284384	-0.00458066	0.0315023	0.00347016	0.00130817	0.00555203	-0.00123754	-0.00359859	0.0123029	-0.000252136	0.0367307	0.00657512	0.00547704	0.0536329	0.0139534	0.0464975	0.0355999	-0.00282665	-0.00235045	-0.00115203	0.0183828	0.0108098
CG6689	0.0488706	0.0577423	0.00759479	0.109318	0.074108	0.0158061	-0.00287664	0.0346596	0.066564	0.0282111	0.0794851	-0.00422646	-0.00229582	0.110768	0.007027	-0.00325193	0.0461482	0.0338527	0.0547208	0.0231187	0.0144939	0.0193839	0.143635	0.00462718	0.0284162	0.00449648	0.0308209	-0.00113375	0.0772624	0.144681	0.0638292	0.0277982	0.0420941	0.0033831	0.0432328	0.153056	0.0214794	0.108568	0.0506675	0.0023823	0.00365205	0.00520495	0.0409941	0.0224359	0.0476314	0.0678344	0.0346596	0.00271281	0.0355281
CG6765	0.0285116	-0.00385424	0.0275363	-0.00246383	-0.00172798	0.0498235	-0.000695007	-0.000835381	0.0715081	-0.00132935	0.0217124	0.0930113	-0.0020563	-0.00217388	0.149757	0.0322102	-0.00239685	0.0375107	0.0717144	0.0034134	-0.00175893	0.00876667	-0.00253444	0.00490262	-0.000802587	0.0863376	-0.000750722	0.0194187	0.0045615	-0.00453723	-0.00265487	-0.00326757	0.00364396	-0.000897389	-0.00281897	0.00793636	-0.00381105	0.032313	0.0198468	-0.00221469	0.0049973	-0.00222079	0.0837588	0.0495144	-0.00204971	-0.0017044	-0.000835381	0.0533292	0.0570128
CG6791	-0.00388742	0.035566	0.0316253	0.0245036	0.00989376	-0.0031771	0.00209502	0.0107226	0.00800732	-0.00728437	0.00471677	-0.000370777	0.161595	-0.00616288	-0.00395425	0.00641818	0.0149217	-0.00311566	-0.00454598	0.0414626	-0.00822796	0.0285518	0.0124955	0.0120876	0.0335264	-0.00423488	0.0130215	0.208193	0.00919392	0.0314787	0.027205	-0.00225142	0.0174057	-0.000568467	0.00448667	-0.006282	0.00953543	0.0021705	0.00829668	0.0424094	0.210602	0.171705	0.00335387	-0.00316236	0.0133681	-4.3448e-05	0.000174048	-0.00122024	-0.00419594
CG6813	0.231342	0.00685618	0.00537802	-0.00380506	0.020172	0.210576	0.0104916	-0.0024989	0.0947212	0.0437788	0.0197063	0.0854245	0.00664117	0.090158	0.104715	0.0310137	0.0148115	0.0473254	0.155421	0.0153008	0.0246157	0.0072593	0.0166871	0.0670321	-0.0024008	0.0780906	0.00939289	-0.0102878	0.01132	0.0666975	0.00530493	-0.00437432	0.0136525	0.094702	-0.000215111	0.0713845	-0.0044296	0.0496903	0.0316385	-0.00266317	-0.00452651	-0.00664311	0.174189	0.0490409	-0.00185369	0.118211	0.0707241	0.0794771	0.196507
CG7271	0.0271401	0.0146081	-0.00518313	-0.00519206	0.00351962	0.039835	-0.0014646	-0.00176041	-0.00156042	-0.00155483	0.00848817	-0.00574378	-0.00433326	0.00552712	-0.00433326	0.0140579	0.00530172	-0.00416371	0.0248433	0.0159083	-0.00370661	0.00974636	-0.00534085	0.0241622	0.0136917	-0.00980121	-0.00158201	9.57918e-06	0.0455586	0.0422447	0.00376355	-0.00307085	0.00966655	-0.00189108	-0.00105929	0.00784414	-0.00474813	0.00943727	0.0039338	0.0121257	0.00625047	-0.0046799	0.0146083	-0.00109153	0.00776868	0.0544843	-0.00176041	-0.00201331	0.0654723
CG7357	0.0020182	0.0779215	-0.0162921	0.0574117	0.011335	0.00502133	0.0246294	-0.00345504	0.00433824	-0.0041832	0.0290026	-0.0018594	-0.00539473	-0.0153905	-0.0085046	0.0129725	0.0274934	0.0112411	0.003353	0.292198	0.00725197	0.00519677	0.0325022	0.0226231	0.0046209	-0.0136445	0.00538332	0.0119973	0.0172671	0.00086157	0.0445702	0.155835	0.0100305	-0.0037115	0.00612459	-0.0071157	0.0367696	0.00789396	0.01456	0.271106	0.0114663	0.00234093	0.00088614	0.0224554	0.00712155	0.00793951	-0.00345504	0.0160648	0.00136403
CG7372	-0.00646649	-0.00279281	0.0214461	0.00726777	0.00195631	0.00761214	0.00501259	-0.00386614	0.0336297	0.00994337	0.0249928	0.00428473	-0.00672514	0.00332218	0.00164903	-0.00363612	0.01289	0.0315139	-0.00164169	-0.00925321	0.0048987	0.00942863	0.0223139	-0.000567889	-0.00371437	0.0349389	0.0117635	-0.0142355	0.00549988	0.0466762	0.0050564	0.000785335	0.0265135	-0.00415312	0.0159582	0.00733919	0.00517793	0.0291357	-0.00369669	-0.00765614	-0.0177781	-0.00510508	0.0220942	-0.00239718	0.00451538	-0.0011611	-0.00386614	-0.00442156	-0.00337144
CG7745	0.0491945	0.020432	0.0146196	-0.00686131	0.00499145	0.0547814	-0.00271149	-0.00325914	0.00284813	0.106108	-0.00442957	0.0142667	0.00184899	0.0751316	0.00513945	0.0140988	-0.000869912	0.00940839	0.0557578	0.00592315	0.000822874	0.0191496	0.000813461	0.0592729	0.00527021	0.0306645	0.00605228	0.0163082	0.00754449	0.0620502	-0.00524671	-0.00441394	0.00100147	0.00401397	-0.0130685	0.0191422	-0.0148684	0.0100842	0.00089963	0.00664524	0.0421032	-0.00256658	0.0202342	0.0109922	-0.00799672	0.0329983	0.029029	0.0174512	0.049222
CG7786	0.0176559	0.0200881	-0.000646283	0.0161686	0.105677	0.00455039	0.0325856	-0.000934105	0.0508548	-0.00250447	0.0804838	0.0226445	0.0203347	0.0178467	-0.00229931	0.0286377	-0.00268011	0.033113	0.0526715	0.00858489	0.0244649	-0.00457809	0.0431726	0.00366523	-0.000897436	0.00497345	-0.000839442	0.00297015	0.0103894	0.0311393	0.0146097	-0.00365373	0.00894433	0.0248432	0.0244431	0.0262125	0.00807182	0.0345232	0.0100706	0.00803801	-0.00413113	-0.00248324	0.0249952	-0.000579187	0.0431202	0.0117303	-0.000934105	-0.0010683	0.0059572
CG7963	-0.00314716	0.00697412	0.00633058	0.0383091	0.00448614	-0.00746008	0.00665239	0.0045044	-0.00498889	-0.000551507	0.0127954	-0.00124205	0.142265	-0.0139733	-0.00825027	0.00520015	0.0371577	-0.00459565	-0.00225485	0.0211612	0.00790197	0.0161286	0.015869	-0.000585465	-0.00322014	-0.00858423	-0.00301205	0.179073	0.018601	0.0098343	0.0689365	0.0112235	0.0130585	-0.0036005	0.0039547	-0.0161721	0.0265897	-0.00553559	0.0119082	0.0119417	0.139511	0.180993	-0.00653493	-0.00207821	-0.00501119	-0.00297966	0.0045044	-0.00383323	-0.0105279
CG7987	0.163763	0.0133214	0.0657993	0.00468932	0.0215328	0.132406	0.0130705	0.009676	0.118426	0.060158	-0.00530236	0.115015	0.0125354	0.0571318	0.13153	0.0540712	0.000694315	0.0454755	0.0735629	0.0138423	0.0273336	0.0160445	0.0106636	0.0666989	-0.00374817	0.179796	0.0342602	0.0306048	-0.00516615	0.0508942	-0.00165257	-0.00124174	0.0291637	0.0653316	0.0109095	0.0286136	-0.00573473	0.0600501	0.0451769	0.00765466	0.0371221	0.0127053	0.237022	0.00852512	-0.00402011	0.102076	0.0571966	0.0667837	0.133415
CG8089	0.0466737	0.09406	0.00153812	0.0169257	0.0275266	0.0258447	-0.00135679	-0.00163082	0.0065861	0.0095656	-0.00221649	0.0192707	0.0154837	0.00789553	-0.00401429	0.0154174	0.00648886	-0.00385722	0.0148361	0.233761	-0.00343376	0.0019179	0.0161895	0.0437934	-0.0015668	0.00260627	-0.00146555	0.00502892	0.00161524	0.0233555	-0.000135214	-0.00637894	-0.00332723	0.0427792	-0.00918397	-0.000438399	0.00318456	0.011352	0.00135184	0.339867	0.00894383	0.00168657	0.00730947	-0.00101118	-0.00400143	0.0201664	0.0621446	-0.00186511	0.0357275
CG8281	0.0630627	0.017217	0.0144156	0.00077593	-0.00694964	0.0502766	0.0066238	0.0201539	0.026087	0.0556708	0.00697404	0.0301409	-0.00188004	0.0413747	0.0428503	0.0385055	-0.00414966	0.00202575	0.0598617	-0.000496038	-0.00334301	0.00464567	0.00799098	0.0116648	-0.00322788	0.031561	0.0405839	-0.00421072	-0.00340463	0.0192314	0.00669213	-0.00100304	0.00746048	0.0255791	-0.0162883	0.0282222	-0.00314062	0.0107558	-0.00187229	0.00296668	-0.002626	0.0029098	0.0721682	-0.00208321	0.00457724	0.066291	0.0201539	0.0372861	0.0647527
CG8388	0.0585856	0.0340831	-0.00353262	0.0139482	0.0118976	0.0410357	0.0346634	0.00441742	0.0257786	0.02424	0.012626	0.00100117	-0.00513826	0.109714	0.00121755	-0.00317748	0.00668859	0.00523432	0.0501753	0.0368342	-0.00340241	0.010902	0.0543453	0.027786	0.0454383	0.00261745	0.0229857	-0.000511464	0.0321112	0.178883	-0.00086466	0.00690774	0.0109082	0.0181446	0.0034974	0.11557	-0.00502296	0.0466713	0.0368905	0.0323789	-0.00390571	0.00279658	0.0118364	0.023041	0.0204028	0.042886	0.0200092	0.0097722	0.059297
CG8478	-0.00222898	0.019633	-0.00255367	0.051672	-0.000340294	-0.00329982	-0.00212866	0.0076623	-0.00272674	-0.00302209	0.0115716	0.00111071	0.256187	-0.019236	-0.006298	-0.00240637	0.0105572	-0.00605159	-0.00647676	0.0448606	-0.000521722	0.0192265	0.0125627	0.00618678	-0.00245816	-0.00862666	0.00907272	0.237886	0.0339614	-0.000621367	0.0404056	0.0348414	0.0104436	-0.00274852	0.0145687	-0.0171613	0.0428145	-0.00406878	0.00238932	0.0280555	0.194992	0.213242	-0.0132098	-0.00158645	0.00626128	-0.000199968	0.0178832	-0.00292617	-0.00803668
CG8765	-0.00497254	0.00420046	0.00966763	0.0451925	0.0139424	-0.00738414	-0.00172818	0.023019	-0.00123105	-0.00358159	0.0248902	-0.00677749	1.98583e-06	0.00631471	-0.00511311	-0.00195364	0.0160136	0.000408664	0.0146421	0.0195505	0.00159966	0.0210189	0.0311276	0.00512877	0.0633052	-0.0115651	0.0120946	-0.00239055	0.116045	0.070695	0.0569595	0.0566529	0.0409027	-0.00223142	0.0506862	0.0110329	0.0406935	0.00837557	0.0103726	-0.00550696	0.00851249	-0.000782727	-0.00336157	-0.00128797	0.0205603	0.00808856	0.0104709	-0.00237565	0.0175876
CG8924	0.120491	0.0562366	0.0657517	0.0481986	0.0333375	0.085825	0.0328824	0.0119743	0.0637139	0.0545492	0.0183168	0.0372505	-0.00204852	0.18947	0.0328673	0.0326456	0.00945874	0.0774429	0.0990565	0.0207021	0.0301646	0.0609138	0.0608091	0.0863843	0.022332	0.0488758	0.0196349	0.0104753	0.0503421	0.281417	-0.00498109	0.00306689	0.00330952	0.0354625	-0.00131957	0.220859	-0.00460665	0.0801042	0.0463275	0.00784208	0.070229	0.000921887	0.0976706	0.00351125	0.0496592	0.071782	0.0390229	0.0364405	0.100805
CG8944	0.0370101	0.0238154	-0.0048415	0.0618382	0.0896633	0.0148894	-0.000686255	0.0306053	0.0308953	0.00341273	0.0220175	-0.00269132	0.0235939	0.020323	-0.0020304	-0.000775785	-0.00236667	-0.00195096	0.0228348	0.00355035	-0.00173678	-0.00404269	0.0391652	0.00504656	-0.000792481	-0.00459248	-0.000741269	-0.00339591	0.0206705	0.0270091	-0.00262144	0.00488626	0.00378185	0.0283753	0.0416593	0.0272622	-0.00376306	0.0182489	0.0280269	-0.0021868	0.00523446	-0.00219283	0.0047199	-0.000511451	0.0108291	0.0446302	0.0620354	-0.000943363	0.00747502
CG9215	-0.00538928	0.0203052	0.0102395	0.0830285	0.00886694	-0.00662396	-0.00220534	-0.00265076	0.0314044	-0.0027339	0.0472735	0.000487595	-0.00250045	-0.0120767	0.00152396	-0.00249305	0.00622502	0.0230392	0.0167754	-0.000416203	-0.000881619	-0.00071807	0.0443109	-0.00763692	-0.0025467	-0.00209527	0.0195867	-0.00364175	0.0371059	-0.00560208	0.0478348	0.0737245	0.03471	-0.00284752	0.0607278	0.0244814	0.0997451	0.0135899	-0.000881688	-0.00702746	-0.00667084	-0.00704683	0.00813961	-0.00164359	0.0136822	-0.00540825	-0.00265076	-0.00303157	-0.00200255
CG9609	0.0387801	0.0538394	0.00104736	0.0311091	0.0459092	0.0157316	-0.000659307	-0.000792471	0.0252393	-0.00078125	0.0230054	0.0075054	-0.00195067	0.0161833	-0.00195067	-0.000745321	0.00918302	-0.00187435	0.049873	0.0114782	0.0294758	-0.00388394	0.0518051	0.00550707	-0.000761361	-0.00441215	0.0720808	0.00476849	0.0134672	0.0360047	0.018194	0.0137875	-0.00342881	0.0296037	0.0229185	0.0235906	0.00365083	0.0344437	-0.00320916	0.0102882	-0.00233873	-0.00210672	0.0157769	-0.000491368	0.0381874	0.0305181	0.0646321	-0.000906319	0.0184639
CG9727	0.0711846	0.0454099	0.0136882	0.0323161	0.0386384	0.0498029	0.00867399	0.0155326	0.0639956	0.0190234	0.0367272	0.0133806	0.000474916	0.119879	0.0267043	0.00709093	0.00147631	0.063427	0.156784	0.0147565	0.0246263	0.0260207	0.0279073	0.0202842	0.025962	0.0161259	0.0383469	-0.00948309	0.0983994	0.233982	0.0142183	0.00545463	0.0134599	0.0226103	0.00862148	0.131868	0.00945043	0.0557134	0.0113866	0.00636546	-0.00350736	-0.00758071	0.0491111	0.0871445	0.0681833	0.0393314	0.0706853	0.012817	0.14707
CG9876	0.00594393	0.0270431	0.0137472	0.00962099	0.0152646	0.00718057	-0.000621568	-0.00074711	-0.00343093	-0.000171093	-0.00101541	-0.00243764	0.0123039	-0.00624446	-0.00183902	-0.000702659	0.0100075	-0.00176706	-0.00189121	0.00464172	0.0149429	0.0035271	0.0322302	0.00620093	-0.000717781	0.00219777	-0.000671397	0.00544197	-0.00297063	0.000564016	0.0195935	0.00603305	0.00488179	-0.000802566	0.0295174	-0.00366138	0.00429814	0.00477738	0.0229435	0.0111593	0.00711928	0.0111181	0.00626227	-0.000463242	0.0265429	-0.0015243	-0.00074711	-0.000854441	-0.00234671
CG9932	0.00980919	0.0419749	0.0642303	0.11213	0.0714503	-0.00502694	0.0169369	0.0011334	0.139099	0.0198228	0.0531437	0.0507072	-0.0020025	0.0162539	0.00975239	0.0201685	0.0210424	0.0599723	0.0317157	-0.00596071	0.0122067	0.00238356	0.117833	0.0002478	0.00755331	0.0798788	0.02792	0.0049929	0.0284525	0.0101407	0.0601332	0.0354658	0.0581833	-0.00497788	0.103564	0.0743534	0.0377881	0.0599547	0.0301586	-0.0101008	0.00896189	0.0072859	0.0704749	0.00642435	0.0499503	0.0160404	-0.00463391	0.0148759	0.0205389
CHES-1-like	0.00425498	0.0223101	0.0262047	0.0280513	0.0127118	0.00540761	-0.000720626	0.029068	0.0224483	0.00707367	-0.00117724	0.00640794	-0.0021321	-0.00550046	-0.0021321	-0.00081464	0.00799858	0.0233418	0.00967569	0.00987993	-0.00182376	0.00815948	-0.00262786	0.00449567	0.0303235	0.0280878	-0.000778396	0.0405281	-0.00344405	0.0515378	-0.00275274	0.00433852	0.0102541	0.0548068	-0.00705004	-0.00601765	-0.00395153	0.0170284	-0.00350763	-0.00229633	0.0691054	0.0203096	0.00875289	-0.000537067	-0.00212527	-0.00176723	0.029068	0.0251888	0.00686614
CTCF	-0.00693073	0.0743938	0.0390036	0.0126395	0.0228869	-0.00877171	-0.0052342	0.0242189	-3.32377e-05	-0.00977178	-0.0021332	0.00770812	-0.00304911	-0.0163236	0.00938806	0.0357888	0.00332006	0.00730175	-0.0038291	0.0260811	0.00127723	0.0603788	0.0228057	0.0202365	0.0121015	-0.01586	0.0185937	0.0704046	0.00819782	0.0811686	-0.000675957	-0.000982824	0.00845725	0.00541521	0.0181107	0.0299681	0.000342786	0.00181494	0.00170944	0.0295416	0.0804289	0.024431	0.00400796	0.00312566	0.0433826	0.00857236	0.00242585	0.00424047	0.00396889
CTPsyn	0.039947	0.0206777	0.0341164	0.016614	0.0255632	0.0369119	-0.000761421	-0.000915208	0.0708373	0.0184922	-0.00124388	0.0931589	0.00929725	0.00113027	0.0901476	0.0292634	-0.0026259	0.0338852	0.0763205	-0.00404649	-0.00192701	0.0013853	0.016005	0.00388776	-0.000879281	0.0675903	0.0307027	0.0171007	-0.00363902	0.00383632	0.00606161	-0.00357982	0.0225469	-0.000983142	-0.00018115	0.0223628	-0.00417523	0.0354008	0.0245711	-0.00242632	-0.00029631	0.00826874	0.0754869	-0.000567471	0.0209281	0.0816347	-0.000915208	0.122853	0.0697204
Camta	0.0853812	-0.00279197	0.00390809	-0.00178478	0.0194961	0.0464112	-0.000503456	-0.000605142	0.00667189	0.0145826	0.0307027	0.024445	-0.00148956	0.0303658	0.0159664	0.0449584	-0.00173626	0.0167298	0.0494025	0.0267427	-0.00127415	0.00590686	0.0265493	0.0200849	0.0439881	0.012324	-0.000543816	-0.00249133	0.0084709	0.0370012	-0.00192316	0.00868615	0.00739683	0.118952	0.00605891	0.0180141	-0.00276069	0.0271287	0.0296017	0.0308318	0.000485492	-0.00160872	0.0234354	-0.000375215	-0.00148479	0.0197985	-0.000605142	-0.000692078	0.0392424
Cf2	0.0089747	0.00524613	0.0477555	0.00755389	0.00224725	0.000377688	-0.00165232	0.011131	0.019829	0.0129529	0.00695737	-0.00243364	0.128787	-0.000377899	0.0111524	-0.00186788	-0.00569831	0.000865615	0.000173234	0.000230197	0.00830666	0.0201625	-0.001678	0.00950959	-0.00190808	0.0105743	-0.00178478	0.226906	-0.00123323	0.0159697	-0.00215905	-0.00438262	0.00367805	-0.00213346	-0.00943565	-0.00641392	0.00842111	0.00652507	-0.00476992	-0.000297399	0.182411	0.192892	0.0144232	-0.00123144	0.0112192	0.00883349	0.011131	-0.00227136	0.00216358
CkIIalpha-i1	-0.00406719	-0.00476093	-0.00605671	0.0397942	-0.00213447	0.00345884	-0.000858503	-0.0010319	-0.00473877	0.000109366	0.0171042	-0.00336684	-0.00254003	-0.00396498	-0.00254003	-0.000970505	0.0762769	-0.00244065	-0.00261212	0.018464	-0.00217271	0.0261945	0.0385276	0.00260131	-0.000991391	-0.00574519	-0.000927326	-0.00424827	0.0214382	-0.00427904	0.132015	0.00894109	0.0190525	-0.0011085	0.0238424	-0.00898194	0.0232114	0.0129704	0.0397253	-0.00273568	-0.00526766	-0.00274322	0.0013792	-0.000639824	-0.00253189	-0.00210535	-0.0010319	-0.00118014	0.00480968
Clamp	-0.0136912	0.0029165	0.0965728	0.00967393	0.00796511	-0.0148723	0.0149567	0.00643291	-0.0030609	-0.0161949	-0.000184322	-0.00919222	-0.00775804	-0.0325122	-0.00629754	0.000189883	-0.00133022	-0.00652538	0.0027345	-0.016872	-0.00128046	0.240417	-0.001401	-0.000444783	0.0110568	-0.00195867	-0.00311164	0.0149814	0.0259283	0.00128937	0.00892678	0.00239805	0.0135884	-0.00181349	0.0345088	-0.0278289	0.0188791	-0.00875705	-0.00874341	-0.0195827	0.05742	0.0168932	0.00689231	0.000878569	0.00992333	0.0032429	0.00285008	-0.00276629	-0.00759757
CoRest	0.0881808	0.168603	0.0530715	0.0776503	0.0644629	0.0706516	0.0116158	0.00836648	0.098695	0.0256648	0.0545051	0.0347664	-0.00526365	0.113414	0.0178307	0.0294909	0.00331511	0.0914594	0.139057	0.0692591	0.018077	0.0614719	0.104021	0.0298524	0.0549084	0.026085	0.0382279	0.0227941	0.0167851	0.179069	0.00451404	0.00622814	0.0347273	0.0247659	0.0245621	0.229653	0.00450304	0.0865898	0.0362969	0.0793981	0.0502863	0.00779326	0.0722498	0.0481219	0.0848837	0.0779565	0.039841	0.0337071	0.0774557
CrebB	0.0893384	-0.00460195	0.0303866	0.00592077	-0.0020632	0.0775517	-0.000829836	-0.000997442	0.0872457	0.0158628	-0.00135564	0.10905	0.00814507	0.0267001	0.114148	0.10965	0.00624555	0.0417548	0.069646	-0.00441008	0.0226576	0.000499519	-0.00302611	0.0301882	-0.000958286	0.0992749	-0.00089636	0.00227776	0.00263921	0.013563	-0.00316991	0.00281066	0.0139297	-0.00107148	0.00522223	0.000571877	-0.00455038	0.0257755	0.00244881	-0.00264433	0.00505641	-0.00265162	0.130505	0.0413033	-0.00244735	0.125691	-0.000997442	0.158056	0.0884771
D	0.0839958	0.0205022	0.00724839	0.00137841	0.0123645	0.0781907	0.0121835	0.00945128	-0.0025184	0.0425484	0.0141688	-7.70556e-05	0.00402936	0.0890475	-0.00549657	0.0227448	0.00177744	-0.000326151	0.0453059	0.0195592	0.00642257	0.0229495	0.000970416	0.0586764	0.0221768	0.0175414	0.0109935	-0.00919317	0.0326714	0.129125	0.000301579	0.00332933	0.00673451	0.0411134	-0.0016908	0.0537241	-0.00499642	0.0146174	0.00844861	0.00293043	0.0129118	-0.00593628	0.0396913	0.0174519	0.027968	0.0585734	0.0912413	0.00766487	0.120216
D19A	0.0568375	0.0512617	0.0202175	0.000613346	0.0120751	0.0619069	0.00830811	0.00867422	0.0283418	0.0316293	-0.000914978	0.0279283	0.0114786	0.16831	0.0114786	-0.00246384	-0.00374074	0.0300177	0.0492056	0.0282301	0.0469438	0.0240703	0.0307315	0.0582519	0.00549776	0.0428579	0.00678462	-0.00108064	0.0178796	0.240041	-0.00377488	-0.00834764	0.00439354	0.0107274	-0.00958084	0.183418	-0.011267	0.0430068	0.0312745	0.0393928	0.0361862	-0.00541311	0.0468087	0.00196192	0.0245022	0.0339064	0.0244173	0.00912605	0.0660303
D19B	0.0052454	0.019156	0.00728281	0.0323161	0.0119163	0.0107118	0.00867399	0.00634053	0.0416798	0.00554061	0.0299601	0.00770941	0.000474916	0.0205946	0.00422197	-0.00268193	-0.00174303	0.0322396	0.025582	0.00212675	0.0333778	0.00697479	0.0279073	0.00584741	0.00682757	0.0161259	-0.0025626	0.0198542	0.00267072	0.0462225	-0.000332157	-0.00166332	-0.0015889	-0.00306325	-0.000810034	0.0716901	0.00128334	0.034411	0.0113866	0.00636546	0.0105347	0.0201941	0.0227103	-0.00176811	0.0268343	0.0122418	0.00634053	-0.00326125	0.0145943
Dbx	0.0320833	0.0275186	0.082187	0.0920813	0.05021	0.0125911	-0.00312517	0.0173614	0.152088	0.0169181	0.0467168	0.0746022	0.00797044	0.00301616	0.0510124	0.033887	0.0262024	0.0717206	0.0379369	-0.00210076	0.0155473	0.023887	0.0702596	0.00578422	0.00371757	0.0964624	-0.0033757	0.0104578	0.00830812	0.0148992	0.0370897	0.0161952	0.0644169	0.0287324	0.0732502	0.0546205	0.020389	0.0602661	0.00410745	-0.0072926	0.0238375	0.00330755	0.0881372	0.00901897	0.0425982	0.019996	0.00328287	0.0326416	0.0220173
Deaf1	0.0297996	0.0336211	0.237838	0.0304517	0.0106989	0.0119648	0.00858994	0.00775853	0.0676433	0.0372008	0.0148425	0.0681817	-0.00806193	0.0738919	0.0430499	0.0128289	0.00265956	0.0632921	0.0367474	-0.0189953	0.0334327	0.0980043	0.0314459	0.028488	0.00877483	0.191977	-0.00418262	0.0126243	-0.00541559	0.0509193	-0.000614649	-0.016299	0.0131189	-0.000172452	0.00673402	0.117761	-0.0112864	0.041356	0.011534	-0.0181708	0.0584971	0.00792317	0.12801	-9.95392e-05	0.0527699	0.0307897	0.00115931	0.0275194	0.0222158
Dfd	-0.00533542	0.107671	0.0276688	0.0102553	0.0132419	-0.00417415	0.0128309	-0.00214416	0.00625771	-0.00617693	-0.00291417	0.00425879	-0.000320388	-0.00843291	-0.00527787	0.0497027	0.0066259	8.63695e-05	-0.00060589	0.191035	-0.00451462	0.0247692	0.00155628	0.0267496	0.0232555	-0.0052525	-0.00192687	0.0120726	-0.00234737	0.00921279	0.00473624	0.00103044	-0.00927721	0.00901899	-0.00809329	0.00271804	0.00912757	0.00190883	0.000419916	0.261459	0.0303983	-0.00110671	-0.00604147	-0.00132948	0.00965888	-0.00437466	0.0100173	0.00818381	-0.00284004
Dip2	-0.00386919	0.0247669	0.00342391	0.069919	0.00951952	0.00115993	-0.00156512	0.0119583	0.000524047	-0.00309512	0.0280088	0.0024004	0.00665238	-0.00385402	0.0122939	0.0129446	0.0673074	0.00141992	-0.00476211	0.0138668	-0.00396102	0.0079852	0.0264006	0.00361402	-0.00180739	-0.00286619	-0.00169059	0.00584582	0.048765	0.040405	0.0816496	0.0497974	0.024228	-0.00202088	0.037938	0.00314918	0.0805658	-0.0050091	0.0165525	-0.00498737	-0.00134315	0.0106804	0.00334701	-0.00116645	0.00670317	-0.00383822	0.0119583	0.00995209	0.0162525
Dlip3	0.0126095	0.0166013	0.0113165	0.0398451	0.0734565	0.0146281	-0.000695007	-0.000835381	0.0646586	0.00322281	-0.00113538	0.0164218	-0.0020563	0.00881664	0.0105948	-0.000785678	0.00847254	0.0243485	0.022495	0.0034134	0.0277887	0.00233621	0.0797539	-0.00322117	-0.000802587	0.00672253	0.0683104	-0.00343921	-0.00332161	0.0092438	0.0268211	-0.00326757	0.0326777	0.0279963	0.0330049	0.0159566	0.0168698	0.0179284	-0.00338293	0.0212932	0.00104648	-0.00222079	0.0292863	-0.000517974	0.0360246	-0.0017044	0.0301998	-0.000955393	-0.00262397
Dll	-0.00409812	0.0226285	0.0389044	0.00559273	0.00238289	0.00248392	-0.00313922	0.0242628	0.00432869	0.0155849	-0.00512832	0.000661562	0.0649979	-0.00113165	-0.00928793	0.0188068	-0.0034619	0.00891084	-0.00677261	0.0298631	0.00206486	0.0163613	0.000167445	0.0258137	0.0620302	0.00467827	0.00440754	0.454232	-0.00610147	0.0401965	-0.00533471	-0.00752244	0.0115414	0.00247204	-0.0136317	-0.00460515	0.0217077	-0.00835829	-0.0100339	0.0377782	0.403567	0.350002	-0.00527886	-0.0023396	0.0337356	0.00607217	0.0102448	-0.00431535	-0.00736255
Doc2	-0.00353478	-0.00841648	-0.00822165	0.082147	-0.00377338	-0.00243968	-0.00151768	-0.00182422	-0.00837731	-0.00447245	0.0290318	-0.00595198	0.00132572	-0.0164313	-0.00449033	-0.00171568	0.0847109	-0.00431464	-0.00461778	0.0148051	-0.00384096	0.0206219	0.0370244	-0.00703407	-0.00175261	-0.0101565	-0.00163935	-0.0040074	0.0471076	-0.0110958	0.0935755	0.0849332	0.0421604	-0.00195963	0.0455391	-0.0149315	0.118445	-0.00796734	0.0317702	-0.00483621	-0.011337	-0.00484954	-0.0117438	-0.0011311	-0.00447594	-0.00372189	-0.00182422	-0.00208629	-0.00116054
Doc3	-0.00597574	0.00611061	0.00704521	0.0080929	0.00352472	-0.0097861	0.00914269	0.00676091	0.00625522	-0.00542734	0.00326244	-0.000177667	0.0281275	-0.00905899	0.000980065	-0.00258913	0.0120935	-0.00651121	-0.00319663	0.0139718	-0.00126747	0.0121341	-0.00519883	0.00183664	0.0072572	-0.00138084	0.00811139	0.329679	0.00838645	0.00326643	0.0153467	-0.00585662	0.00366434	-0.00295727	-0.00410381	-0.0133889	0.0149131	-0.00761389	0.00309403	0.0179239	0.219634	0.312491	0.00201208	-0.00170694	0.00102649	-0.000943735	-0.00275292	-0.00314841	-0.00255319
Dp	0.00517027	0.0719027	0.05726	0.021383	0.0188711	-0.000725922	0.00696177	0.0234152	0.0233647	-0.0110824	-0.00405667	0.0339334	0.0157781	-0.00651315	0.0197213	0.0307242	0.00255253	0.0113588	0.0107418	0.0305983	0.0066185	0.0196323	0.0198656	0.0404249	0.0650914	0.0352645	0.0111074	0.303467	-0.00999957	0.0790645	0.00975011	-0.00943814	0.0164728	0.00748804	-0.00343555	0.0143528	0.0270733	0.0237192	-0.00580196	0.0291042	0.309889	0.187874	0.0125389	0.0043221	0.0653636	0.0170727	0.00890528	0.00628006	0.0040816
Dref	-0.0109492	0.0289752	0.00736074	0.0283563	0.00043603	-0.0128033	-0.00408423	-0.00490914	-0.00324764	-0.0217385	0.00941967	-0.00421745	-0.000946095	-0.0341222	-0.00540121	0.00700251	0.00696704	-0.00465848	-0.00376053	0.0446169	-0.00253244	0.000849516	0.00502865	-0.000334083	0.0237213	-0.00830722	-0.00441165	0.262862	0.0262853	0.0119334	0.0328386	0.0287549	0.0324369	-0.000186055	0.0553598	-0.0261472	0.0844185	-0.0100433	0.00193453	0.0428643	0.178148	0.176833	-0.0159088	-0.00304389	0.0147707	0.000720249	0.000555408	0.00394381	-0.00491928
Drgx	0.012152	0.00028452	0.0378959	0.0307672	0.0138887	0.00848338	0.00683324	-0.00565215	0.0248891	0.0101895	0.0311857	0.00376706	-0.0080433	0.0875917	-0.00217379	0.00999264	-0.0010884	0.00291582	0.000915889	-0.00960306	-0.00047692	-0.00383411	0.0576169	0.00207629	0.00456065	0.00986604	0.0109411	-0.00677294	0.00922341	0.0839888	0.0033101	0.00390789	0.00809773	0.00733357	0.0143219	0.0837751	-0.0012651	0.0520623	0.0298012	-0.0131667	-0.00177903	-0.00233614	0.0202849	-0.00350459	0.00183366	0.0120426	0.0231455	-0.00646415	0.00376629
E(bx)	-0.0120206	0.107911	0.0888258	0.0216344	0.0239421	-0.00959664	-0.00145443	0.0195546	0.0190057	-0.0164326	0.00421081	0.0270876	0.0867901	-0.0229683	0.00863572	0.0298374	-0.000763184	0.0104109	-0.00780376	0.145155	0.00473604	0.143844	0.0287274	0.0582221	0.0568546	-0.00403413	0.0190497	0.240179	-0.00462433	0.07595	0.00112092	-0.0116768	0.00793082	0.00288193	-0.00521275	0.0176336	0.0118983	0.00993992	-0.00176437	0.159307	0.290198	0.154423	0.00815461	0.00166345	0.0762048	0.00208347	0.00038209	0.0151409	0.00167249
E(spl)m3-HLH	0.0300181	0.050006	-0.00775874	0.0362703	0.0543711	0.0398547	0.0461128	0.0379654	0.0329479	0.0223873	0.0560492	0.00174668	-0.00325382	0.0791677	0.00475368	0.0196415	0.00308705	0.0301973	0.0122305	0.0166471	0.00656779	0.0179422	0.0676054	0.00518678	0.0600657	0.00343865	0.0643802	0.00420315	0.0845567	0.126932	0.00201792	-0.000100129	0.0172516	-0.00142	0.0144349	0.0793972	-0.00166719	0.076169	0.0338556	0.00393519	-0.00584608	-0.00351411	0.0196996	0.0308483	0.0288887	0.0841393	0.0576091	-0.00151178	0.0461772
E(spl)m5-HLH	0.070953	0.00659208	-0.00374269	-0.00199621	-0.00435782	0.062677	-0.00175275	-0.00210677	0.0039804	0.0250984	-0.00286335	-0.00305661	-0.000141523	0.0361757	0.00490277	0.0243311	0.00695696	-0.00498292	0.0584479	0.00768738	-0.00443588	0.0101864	-0.00229038	0.0696159	-0.00202406	0.00641005	-0.00189326	-0.00259744	0.0230549	0.062291	-0.0027778	-0.0050465	-0.00622131	-0.00226315	-0.00921212	-0.00266318	-0.00686253	0.00226958	-0.00235665	0.00378788	0.0252445	-0.00560067	0.0160546	0.0186428	0.0100119	0.0321698	0.047391	0.0192351	0.0726444
E(spl)m7-HLH	0.11665	0.00458277	0.00501072	0.0426649	0.00853104	0.110859	-0.000958448	-0.00115203	0.0344813	0.0546656	0.0316008	0.0240361	0.00634665	0.0414744	0.0338938	0.0228654	0.00458379	0.0163818	0.0774631	0.0310147	0.0190205	0.00368848	0.00397065	0.00735058	-0.00110681	0.0224789	0.0992158	0.00631759	0.00114102	0.0265011	0.0106015	0.0129368	0.0108203	0.0616769	0.0137357	0.0297665	-0.00525562	0.0628322	0.00095495	0.00547704	0.00201666	-0.00306258	0.104006	0.0355999	0.0248083	0.0640342	0.0438996	-0.00131753	0.0540951
E(spl)m8-HLH	0.141781	0.0302315	0.00264598	0.000442384	0.0136993	0.122097	0.0156339	0.0115002	0.00281832	0.0657271	0.00943649	-0.00925724	-0.005387	0.175578	0.00798802	0.0128285	-0.00449815	0.0115901	0.0547955	0.0221409	0.00789402	0.0258137	0.0104919	0.0798546	0.0123622	0.00675822	0.0260137	-0.0121397	0.0624483	0.23602	-0.00347057	0.00339719	0.00563408	0.040551	-0.00626039	0.0926367	-0.012661	0.0444758	0.0224315	-0.000578063	0.0210077	-0.00477864	0.0582951	0.0234061	0.0103269	0.0598276	0.0607167	0.0183028	0.12295
E(spl)mbeta-HLH	0.0997858	0.072081	0.109694	0.0595643	0.0360648	0.0915928	0.0130866	0.00826164	0.126173	0.107459	0.0378725	0.134891	0.00637334	0.192506	0.109118	0.00983144	0.0119794	0.109497	0.0942996	-5.65875e-05	0.0428073	0.03334	0.0487122	0.0418374	0.00228705	0.196299	0.0259763	0.000312176	0.0223763	0.187364	0.0111561	-0.00391728	0.0227772	0.0252407	0.0128025	0.236901	-0.0158266	0.112228	0.0442273	-0.00100753	0.0351498	0.00775634	0.19007	0.038046	0.0450083	0.0733597	0.0284256	0.0343179	0.108784
E(spl)mdelta-HLH	0.0978481	0.0098708	0.0385273	0.0186116	0.00684248	0.0778519	0.0189423	-0.0029471	0.00807619	0.0628117	0.015654	-0.00137796	0.0108885	0.0806733	0.0145171	0.0256197	0.013367	0.00813007	0.0419492	0.0236608	0.0149817	0.0390427	0.00876016	0.0911581	0.00643325	0.0145821	0.0171595	0.00534978	0.0312411	0.0844892	-0.000911787	0.00685343	0.010149	0.0216958	0.0125457	0.0141196	-0.00158158	0.0221974	0.0147163	0.00230063	0.0642028	0.00561362	0.0506236	0.0125228	0.00732943	0.0683139	0.0504615	0.0044144	0.0705657
E(spl)mgamma-HLH	0.00494823	0.0242253	-0.00477897	0.0301538	0.152587	-0.00289435	-0.000677391	0.0310264	0.0243699	-0.00106214	0.0692156	-0.00265656	-0.00200418	0.0349503	-0.00200418	-0.000765765	0.0199669	0.0250817	0.0358114	0.0182742	-0.00171435	-0.00399047	0.0819536	-0.00313953	0.0323577	-0.00453317	0.034695	-0.00335204	0.012938	0.0523092	0.017573	-0.00318475	0.0188175	-0.000874644	0.0301265	0.0443514	0.00335805	0.0407177	0.0284796	-0.00215855	-0.00262807	-0.0021645	0.0506445	0.050826	0.0110231	0.0139781	-0.000814207	-0.000931178	0.0178373
E(var)3-9	0.00353999	0.0635078	-0.00054207	0.0450613	-0.00191274	-0.00328715	-0.000769321	-0.000924705	0.0205107	0.00171639	0.0400344	0.0142848	-0.00227617	0.0207458	-0.00227617	0.0289459	-0.00265314	0.0453869	0.0198969	0.150038	0.0114028	0.00127862	0.034373	0.0184567	-0.000888405	-0.00514837	0.0303713	0.00307796	0.0176931	0.0129562	-0.00293875	-0.00361696	0.00255786	0.0251154	-0.00392966	0.0315532	-0.00421855	0.0284567	-0.00374465	0.22059	0.020972	0.00813387	0.00299647	0.0446366	0.0206674	-0.00188664	-0.000924705	0.0234686	0.00607688
E2f1	0.0198705	0.0198001	0.0280747	0.0730801	0.0787249	0.00980858	0.0129567	-0.00212762	0.0578452	0.0281603	0.0783047	0.0157401	-0.000241649	0.0353116	0.00475386	-0.00200103	0.0239392	0.0157569	0.0091905	0.0214622	0.00718759	0.012425	0.10727	0.00783509	-0.0020441	-0.00286361	0.0526278	0.0153096	0.0164424	0.0422487	0.0203961	0.0264727	0.0366521	-0.00228555	0.0314066	0.0707253	0.00934806	0.0929476	0.0341898	-0.000999315	0.0106215	0.0221155	0.0449648	-0.00131922	0.0148253	0.0317745	-0.00212762	0.0082843	0.0129408
E2f2	0.019991	0.0569588	0.0310553	0.0429993	0.033551	0.00401349	0.00333296	0.0131887	0.0430785	0.00107527	0.00254762	0.0435219	0.00331058	-0.00672045	0.0201549	0.0396807	0.00150173	0.0193504	0.0143019	0.0151593	0.00172211	0.0133149	0.03911	0.021199	0.0693847	0.0126897	0.0222093	0.32486	-0.0104774	0.066896	0.000584203	-0.00396882	0.010814	0.0281185	0.00408951	0.0199879	0.0318254	0.0418174	-0.00357811	0.0103723	0.296558	0.202024	0.0311802	0.0257465	0.0709842	0.016872	0.0131887	0.0206432	0.0160495
ERR	0.0142186	-0.00241345	0.0476853	-0.000703089	0.016526	0.00531499	-0.00154553	0.0261687	0.0595088	0.00130883	-0.00252482	0.0328437	0.0068519	0.00288869	0.0182765	0.0131513	-0.000422226	0.0312645	0.000853444	0.00783126	-0.00391143	0.01122	0.0129416	0.0111774	0.0128002	0.11034	-0.00166943	0.0267551	0.0032918	0.00713878	0.0118417	-0.00364925	0.0149038	-0.00199558	0.00105514	-0.0046528	-0.00224959	0.0470941	0.0169511	0.000382275	0.0293532	0.0109398	0.046176	-0.00115185	0.00690295	0.00309275	-0.00185769	-0.00212457	0.0210924
Eip74EF	0.0679264	0.0461712	0.0511255	0.0117672	0.00848733	0.0924486	0.00361025	-0.00440255	0.0625964	0.107487	0.00738297	0.0808503	0.00889974	0.130494	0.0533072	0.0215974	0.0022057	0.0434886	0.0440452	0.0359713	0.0051354	0.0022488	0.0107136	0.0400557	0.00206938	0.118546	0.0162449	0.0160491	-0.00674432	0.0553505	-0.00441136	-0.00159884	0.0149223	0.00653971	-0.0133233	0.0657158	-0.0052972	0.0368742	0.0138817	0.0502158	0.0262786	0.00201149	0.102992	0.0362972	0.0164222	0.0356075	0.0319103	0.000257957	0.0540112
Ets65A	0.0145157	0.011512	0.0253064	0.0210505	0.0315378	0.0069893	0.0404264	-0.000758703	0.0266773	0.00969226	-0.00103117	-0.00247546	0.0120596	0.00566319	0.0120596	-0.000713563	-0.00217685	0.0126953	0.0251713	0.00446926	-0.00159748	0.0245978	0.0203453	0.0417904	0.0348308	0.00203624	0.0373316	0.0136521	0.0056615	0.0382633	0.0192215	-0.00296765	0.00470784	-0.00081502	0.0113523	0.0225854	0.00412768	0.0441929	0.0139761	0.0109281	0.0285686	-0.00201695	0.0114703	-0.00047043	0.0260815	0.0320146	0.0334068	-0.0008677	0.0304428
Ets97D	-0.00673599	0.0963446	0.0225722	0.0162259	0.0292044	-0.00512311	-0.00240347	-0.00288892	0.0107708	-0.0136831	0.00275542	0.0241719	0.000288519	-0.0167384	0.0150877	0.0358814	-0.00193133	0.0316597	-0.000115862	0.0953045	-0.00608272	0.0159305	0.00928421	0.0506311	0.0633504	-0.011095	0.0176007	0.115117	0.016178	0.0711358	0.00231251	-0.00192902	0.00660488	0.00534656	-0.00023229	0.00963927	0.00698087	0.0168299	0.00188817	0.129838	0.16347	0.0574534	0.0190556	0.0128406	0.0337392	0.0342279	0.0152635	0.0125715	0.0112732
Fer1	0.0933932	0.0152518	0.0918721	0.0435268	0.0402339	0.0888494	0.00408422	0.00210317	0.13951	0.0148074	0.0314608	0.134277	0.0127988	0.0626429	0.151773	0.0161771	0.0166648	0.139985	0.0719461	0.00885408	0.0272001	0.005528	0.0332609	0.0300385	0.00909712	0.162812	0.0172898	0.036916	-0.00872244	0.0726076	0.014602	-0.00343147	0.00836156	0.0307439	0.0151251	0.149624	-0.00378153	0.104513	0.0459581	0.00318465	0.0554657	0.0174223	0.199557	0.0584573	0.0413055	0.0627329	0.0273569	0.0448784	0.0959614
Fer2	0.0587031	0.00935918	0.0108048	0.00779784	-0.00177069	0.0656532	-0.000712188	-0.000856033	0.0963377	0.0206285	-0.00116345	0.128012	-0.00210713	0.0134591	0.121358	-0.000805102	0.00815161	0.0365112	0.0458675	-0.00378485	0.0270339	0.00208019	0.00744131	0.0284121	-0.000822428	0.0618326	0.0666292	-0.00352424	-0.00340372	0.00190711	0.00686827	0.00446953	0.0175472	0.0272785	0.0124555	0.0176556	0.00282238	0.0524145	0.00409028	-0.00226944	-0.00702464	-0.00227569	0.11531	-0.000530779	0.0226714	0.0875138	-0.000856033	0.0519987	0.0943129
Fer3	0.0913678	0.0455419	0.0178694	0.0741307	0.0502434	0.103138	-0.00209078	-0.00251307	0.183606	0.021978	0.0961416	0.110532	-0.00194546	0.0736534	0.125269	0.0308157	0.0110059	0.135233	0.113246	0.00556376	0.0343244	0.000615707	0.0854644	0.0229855	0.00841261	0.069878	0.0671864	-0.0026845	0.000576851	0.0395004	0.0216531	-0.00445964	0.0329192	0.0263546	0.0382494	0.130666	8.84496e-05	0.140902	0.0469225	0.0012171	-0.00870401	-0.00668078	0.174705	0.0822924	0.0491357	0.127719	-0.00251307	0.0790052	0.142027
FoxK	-0.00210672	0.000953283	0.0366142	0.022961	0.0015366	-0.000614537	-0.0017701	0.0223819	0.0253896	0.0101854	0.00613013	0.0157401	0.0347269	-0.0102562	0.00475386	0.0110279	0.0024794	0.0105596	-0.0053858	0.00743072	0.0013539	0.0149641	-0.00239332	0.0206663	0.0107107	0.012855	-0.00191201	0.283076	-0.00223422	0.00279657	-0.00288198	0.00116737	0.0108571	-0.00228555	-0.00159993	-0.00422501	0.0175142	0.0134275	0.000556717	-0.000999315	0.202507	0.267432	0.0175893	-0.00131922	0.00981389	0.00769755	-0.00212762	0.0082843	0.00509131
FoxL1	0.273491	0.000767235	0.00470781	0.000267381	0.0107516	0.255474	-0.00200686	-0.00241219	0.041505	0.0815016	-0.00327846	0.0322182	0.00730609	0.110862	0.060281	0.0668143	0.000664683	0.00807338	0.0754748	0.0314938	0.0103869	0.00837272	0.00703885	0.0842462	-0.0023175	0.0679299	0.0339802	-0.00461338	0.012415	0.0767339	0.012905	0.010132	0.00729274	0.0478206	0.00675671	0.0519057	-0.00619353	0.0271107	0.0172515	0.00180803	0.00915664	-0.00641262	0.162455	0.0334216	0.00736731	0.12806	0.116714	0.0256549	0.197055
GATAe	0.0181455	0.00953387	0.0627993	0.0373652	0.00336869	0.0439268	-0.00296866	-0.00356826	0.0684876	0.00633543	0.00603929	0.0750491	-0.00576861	-0.00259081	0.0967308	0.00450677	0.00789281	0.022925	0.0144247	-0.00730896	0.0382536	0.0284819	0.00633206	0.0152788	-0.00342819	0.186113	0.0132502	-0.0037965	-0.0047955	-0.01193	0.019097	-0.000594802	0.000127853	-0.00383313	-0.00153622	-0.00908588	0.00343388	0.0255487	0.0150728	-0.00665896	0.0036697	0.00168715	0.119814	-0.00221248	0.0184635	0.0217797	0.00382724	0.00238696	0.0337937
Gsc	-0.00933216	-0.00607742	-0.0138971	0.0832348	0.0057905	-0.00841668	-0.00196983	-0.00236769	-0.00843882	-0.0134341	0.0211419	-0.0077252	-0.00133196	-0.023665	-0.00582809	-0.00222682	0.0820538	-0.000922306	-0.00599351	0.0122634	-0.00498527	0.0135346	0.0439951	-0.00624252	0.00920505	-0.0111613	-0.00212775	-0.00703979	0.0634275	-0.015278	0.149609	0.0989236	0.0413477	-0.00254344	0.0557036	-0.0191449	0.128845	-0.010341	0.0344424	-0.00627702	-0.0180253	-0.00629432	-0.0134826	-0.00146808	-0.00580942	-0.00483072	-0.00236769	-0.00270784	-0.00743704
Gug	0.00252124	0.00993383	-0.00836507	0.125342	0.0479435	-0.00929079	-0.00217441	0.0174065	0.0321821	-0.00959153	0.0480328	-0.00543962	-0.00643336	-0.000686366	-0.00235289	-0.00245809	0.108192	-0.00193635	0.00529037	0.00449013	0.00879236	0.00585727	0.118141	-0.00221713	-0.00251099	0.00745912	0.00878869	-0.00584495	0.027747	0.0128075	0.108948	0.206813	0.0355141	-0.00280759	0.0480546	0.015431	0.0859085	0.0210622	0.0368685	0.00444439	-0.0125272	-0.00316723	0.0119244	0.0145168	0.0181481	-0.00533241	-0.00261359	-0.00298906	0.00140815
H15	0.01031	0.0146425	0.00189823	0.0679765	0.0357893	0.00154847	0.00791203	0.00565312	0.0167527	0.0143432	0.0342211	-0.00986983	-0.000370994	0.00914594	-0.00744606	-0.00284502	0.0521072	0.000206135	0.0061054	0.0104724	0.00189292	0.0193381	0.0483466	0.00423693	0.00612599	-0.00412072	0.0165925	0.006721	0.0452836	0.0163729	0.0728076	0.0262474	0.037652	0.00482977	0.0488377	0.0319902	0.0536659	0.00488835	0.04621	-0.00801961	-0.00383328	-0.00804172	0.00268109	-0.00187564	0.0103218	-0.00190933	-0.003025	0.00413	0.00439477
H2.0	0.0060414	0.0381633	0.00504805	0.0884541	0.0347786	0.008497	0.0121006	-0.00224486	0.053824	0.0131784	0.0825201	0.007018	-0.000787552	0.0286061	-0.00552574	0.0226044	0.030197	0.0144088	0.0219684	0.0220155	0.000806558	0.0106732	0.147285	-0.00257088	0.0220389	-0.00184916	0.0238479	0.00502624	0.0235509	0.0353243	0.0554231	0.0482238	0.0419382	-0.00241149	0.0562674	0.0631546	0.0233228	0.0521509	0.02861	-0.0015492	-0.00510422	0.011593	0.0170777	-0.00139192	0.0325183	0.0182566	-0.00224486	0.0177637	0.00411656
HGTX	-0.00900405	0.00592028	0.0985244	0.00447454	0.00189133	0.00201048	0.00323014	0.00128318	0.0216304	0.0150392	-0.00620491	0.00134169	0.076974	0.00209997	-0.00170133	0.0143604	0.00328777	0.00656479	-0.00228133	-0.00545305	0.00709214	0.049122	-0.00609721	0.0160765	0.0321372	0.0303089	0.00240454	0.238223	-0.000325897	0.0206519	0.00400679	0.00327727	0.0171787	0.00598574	-0.00340401	-0.00549633	0.00125714	0.0193668	0.000481948	-0.00988833	0.225356	0.1933	0.0266019	-0.00283075	0.0318488	0.00792143	-0.00456539	-0.000106305	-0.00497468
HHEX	0.149324	0.0135873	0.00717976	0.0333685	0.0276395	0.112136	-0.0013523	0.0143709	0.0843263	0.0425211	0.068449	0.0884529	0.00251972	0.051958	0.0807685	0.0494922	0.00654111	0.070781	0.116388	0.0111289	0.0270369	0.00197697	0.0268788	0.0481663	-0.00156162	0.0876774	0.0163373	-0.0066918	0.00572652	0.0395173	-0.00010145	0.00602901	0.0154143	0.0429317	0.00728637	0.0520609	0.0103505	0.0929928	0.0293374	0.0138657	-0.00315655	-0.00432108	0.150338	0.0505682	0.00909483	0.122396	0.0783564	0.0541005	0.122971
HLH3B	0.130669	0.0444249	0.0117435	0.10849	0.0579642	0.0869733	0.0399328	-0.00297428	0.0895353	0.0592882	0.0674002	0.00662432	0.00706377	0.0785076	-0.000128727	0.0065822	0.0223639	0.0303804	0.0624272	0.0434163	0.00633649	0.0164979	0.134249	0.0162429	0.0155068	0.023854	0.0365902	0.00291627	0.0464365	0.0920404	0.0380282	0.0134149	0.0449036	0.0625122	0.0301029	0.110578	0.00406754	0.115814	0.0561902	0.00213849	-0.00306872	0.0087537	0.0836132	0.0123782	0.0215639	0.0502636	0.0323143	0.0197451	0.047166
HLH4C	-0.00597854	0.00714027	0.00791596	0.0313543	1.92381e-05	-0.00138323	0.0038098	0.001841	0.0127952	-0.0132458	0.00773573	0.010612	0.119965	-0.019506	-0.00812259	0.00248728	0.0113406	-0.00237911	-0.00116483	0.0147601	-0.00323042	0.00563495	-0.00289681	-0.000530779	0.00867457	-0.00937649	0.00982777	0.251457	0.00160195	0.00112405	0.00967681	-0.00417578	0.0014812	-0.00464084	-0.00592556	-0.0207075	0.0186101	-0.00459018	0.00402608	0.0188812	0.181022	0.225876	-0.0140488	-0.0026787	0.00451711	-0.00578807	0.001841	-0.00494081	-0.00567706
HLH54F	-0.00285112	0.0360241	0.0144807	0.0100785	-0.00149628	-0.00257143	-0.000601815	-0.000723367	0.0124943	-0.00509287	0.0253958	0.0197465	0.0274322	0.0036691	-0.00178057	-0.000680329	0.0104738	0.0286819	0.0123754	-0.00319829	0.0325912	-0.00354526	0.00968115	0.00659008	-0.000694971	0.00910398	0.0392172	0.00581883	-0.00287622	-0.00293442	0.0203888	-0.00282944	0.00525041	-0.000777061	0.0124948	0.0215335	-0.00330004	0.0134484	-0.00292932	-0.00191773	0.00318687	0.0116106	0.00106055	-0.00044852	0.0714897	0.0161238	-0.000723367	-0.000827288	-0.00227213
Hand	0.0234933	0.0109365	0.0369173	0.0461377	0.0288295	0.022573	-0.00130658	-0.00157048	0.0877655	-0.00134593	0.0100508	0.0561462	0.0163756	-0.000533287	0.0568584	0.0161204	0.0186816	0.0594625	0.0616489	-0.00694371	0.0124517	-0.000838003	0.0391215	-0.00172308	-0.00150883	0.0397825	-0.00141133	-0.00646558	0.00636821	0.00704242	0.0264493	0.0024017	0.0125603	0.0137226	0.0148145	0.0823954	0.000188407	0.0353348	0.0101588	-0.00416352	0.00186198	-0.004175	0.0770437	0.052393	0.0502956	0.0374448	-0.00157048	0.0705818	0.0374745
Hey	0.0240949	0.00449672	0.0692654	-0.00641455	0.0120024	0.0248973	-0.0035889	-0.00431377	0.0441889	0.0139724	-0.00586292	0.0506358	-0.00307323	-0.00572231	0.0572879	0.0221813	-0.00805528	0.0159635	0.0135423	-0.0148343	0.0056024	0.0133741	-0.00286309	0.00920657	-0.00414442	0.0992111	0.00298807	-0.0132154	-0.00304777	0.0252168	-0.00784949	-0.00572545	0.0159669	0.00685417	0.00287192	0.030977	-0.0128274	0.0097561	0.0133183	-0.0067629	-0.00084029	-0.00913747	0.107101	-0.00267473	0.00203095	0.0336251	-0.00431377	0.0274419	0.0259695
HmgD	-0.00216746	0.0958918	0.0442473	0.0449968	0.0438113	-0.00110453	-0.0013342	-0.00160367	0.0033693	-0.0065349	-0.00217958	0.0147715	0.0158781	-0.0128207	-0.00394745	0.0329636	-0.00460122	0.00995791	-0.0040595	0.0188965	-0.0033766	0.0559622	0.0273731	0.0107907	0.0153325	-0.005958	0.0526715	0.0252383	0.00597711	0.0458653	3.58658e-05	-0.00627273	0.0120191	-0.00172271	0.0160566	0.0170159	0.00708788	0.00426693	-0.00244937	0.0141681	0.0631998	0.0141062	0.00260987	-0.00099435	0.0491017	-0.00327192	0.0470314	-0.00183406	0.000154805
HmgZ	0.0169119	0.049998	0.0650175	0.0301987	0.0158588	0.0436626	-0.00279297	0.0123308	0.0988404	-0.000624979	0.00121196	0.0979329	0.00772399	-0.00158323	0.0940564	0.0468798	0.00959815	0.038633	0.0257117	0.0121006	0.0340055	0.00792564	0.0314108	0.0219604	0.0294308	0.168158	0.00571051	0.0709115	-0.00537868	0.0532566	0.00919737	-0.00300784	0.0129927	0.0329072	0.0119109	0.0120956	0.00733494	0.0326009	0.00989	0.0237782	0.09727	0.0236647	0.0885287	0.0105638	0.043086	0.02012	0.0123308	0.0167408	0.0296494
Hmx	0.00790618	0.000204319	0.00190096	0.0049017	0.0208201	0.00962841	0.0277084	-0.0010896	0.0107619	0.00280651	-0.00148089	0.0111356	0.0264374	0.00116997	-0.00268205	-0.00102477	0.00521322	0.00752147	0.0161234	0.0115407	-0.00229419	0.00452727	0.0282619	0.0331961	-0.00104683	0.00265988	0.0255141	0.0130518	-0.00433242	0.0160218	-0.00346279	0.00188424	0.000854582	0.0431665	0.000293326	0.000300849	0.0161855	0.00075939	0.0193514	0.0422021	0.0122774	-0.00289661	0.0119826	0.0377114	-0.00267346	-0.00222307	-0.0010896	-0.00124613	0.0194555
Hr3	0.0339539	0.0737785	0.00206862	0.0221404	0.0157756	0.0223614	0.0219119	0.0178169	0.0233974	0.010147	0.0405005	0.0133222	-0.00333439	0.0560928	-0.00333439	0.0191087	0.00954217	0.0455804	0.0725821	0.0554735	-0.00285219	0.0132225	0.0594306	-0.000204957	0.0386062	0.00650978	0.0841054	-0.000870151	0.0238318	0.0764426	0.0199727	0.00459847	0.00310651	-0.00145516	0.0160217	0.0783081	-0.00192139	0.0296271	0.023214	0.0544954	0.010849	0.00363992	0.0157517	0.0609735	0.0593958	0.00665279	0.0369884	-0.00154922	0.0141649
Hr51	0.0572863	0.0578045	0.0461046	0.0735	0.0696697	0.0533916	0.0178844	0.00481515	0.0941163	0.0263675	0.0631501	0.0306639	-0.00604912	0.141703	0.0342141	0.0143836	0.00609867	0.0788633	0.0824379	-0.00759232	0.0133936	0.00562118	0.112213	0.00906036	0.00557507	0.0390044	0.0332383	-0.0192733	0.000117063	0.160383	0.00890443	-0.00305196	0.028688	0.0108314	0.0212617	0.391119	0.000365027	0.124	0.0572607	-0.0156645	-0.0175137	-0.0112474	0.139405	0.0338521	0.0457434	0.0729674	0.0166678	0.0195939	0.0550796
Hr78	0.0917274	0.0656405	0.0447514	0.0115702	0.00650635	0.0735761	0.00364366	0.0127218	0.0444345	0.131299	-0.000835529	0.0331159	0.00684284	0.18864	0.0358374	0.0227911	-0.00911608	0.00346887	0.0197903	0.0231845	0.0190448	0.0138228	0.0218727	0.0514811	-0.00675985	0.123743	0.0112634	-0.00374358	-0.00890581	0.0652449	-0.0060977	-0.0122218	5.48955e-05	0.018194	-0.0111488	0.0583177	-0.011911	0.0306259	0.016859	0.0232508	0.019227	0.000697753	0.0927878	0.00200772	0.0102072	0.0399901	0.0127218	0.00577674	0.0576287
Hsf	0.0194788	0.0404175	0.00827221	0.0578961	0.101773	0.0228139	0.0387682	0.0151107	0.0480256	-0.00119759	0.0346976	0.00519716	0.00975249	0.0469695	0.00975249	-0.00146649	0.0130411	0.0175215	0.0357088	0.0312795	0.0205234	-0.00418803	0.0891936	0.0201688	0.0332023	0.0127005	0.0356936	0.00995089	0.057314	0.0998349	0.00559957	0.0154151	0.0244433	0.0138447	0.0215169	0.0717856	0.00399487	0.0665909	0.0227997	0.0211199	0.00630361	0.00844728	0.0245405	-0.000966814	0.0575269	0.0786974	0.0317807	0.0127957	0.027135
Kah	0.0207138	0.0194881	0.0381682	0.00748586	0.005389	0.0279313	-0.00202209	-0.0024305	0.0315419	0.0159988	0.0046103	0.0119657	0.00716297	0.0239386	0.0115449	0.0434284	0.00432075	0.012487	0.0236811	-0.000899848	0.015351	0.0326335	-0.000248413	0.0272073	-0.00233509	0.0652559	0.00977593	0.0401358	0.00398804	0.0245078	-0.0043211	-0.00118297	0.0221666	-0.00261091	-0.00185975	0.0223497	-0.00153729	0.00931392	0.0116134	0.00984105	0.0635289	0.0178991	0.0186572	0.0158224	0.0116199	0.0108807	0.0190684	0.0160225	0.0336777
Klf15	0.0555107	0.015619	0.0197945	0.00284937	0.0164102	0.0456994	0.0463556	-0.00131524	0.0898175	0.0254891	0.0272807	0.0505196	0.0209057	0.0238001	0.045049	-0.00123699	0.00314068	0.055499	0.0984275	0.0077476	0.00662877	0.00991633	0.0287259	0.00526407	0.0398323	0.0433227	-0.00118195	0.0236664	-0.000214931	0.0378396	0.00207028	-4.86676e-05	0.0220131	0.0721075	-0.000576836	0.0442544	0.00277026	0.0583089	0.0193024	0.00399019	0.0168526	0.0188736	0.0387849	0.0310115	0.06136	0.0361044	0.0184271	0.0330278	0.0464509
Kr	0.0197404	0.00924515	-0.00548844	-0.00734914	-0.00515422	6.41178e-05	-0.00207307	-0.00249178	-0.00681275	0.0255376	-0.00338663	-0.00165834	-0.00185751	0.027436	-0.00613354	0.00880894	-0.00714936	-0.00144481	0.0394411	0.000993436	-0.000253054	0.0116958	-0.000606479	0.0480537	0.00852383	-0.00426265	-0.00223926	0.00519325	0.0140724	0.0425652	-0.00459807	-0.00974655	-0.00587464	0.0266211	-0.0135545	-0.00955721	-0.0113676	0.00613382	-0.00223907	0.00928516	0.030296	0.00129974	0.0107389	-0.00154502	0.00246541	0.010373	0.00799797	0.0154982	0.045925
Kr-h1	-0.00180027	0.0194468	0.0717776	0.0182282	7.72325e-05	0.000517073	0.00230021	0.000376252	0.0126308	0.00343728	-0.00283639	0.0168495	0.0972342	0.0185629	0.00741409	0.0181544	-0.00304683	0.00869188	0.00226368	0.0246677	0.00226816	0.0478842	-0.00269489	0.0384052	0.0511334	0.0135331	0.00148802	0.373924	0.00333364	0.0447147	0.0011303	-0.00706479	0.00225639	0.00463781	-0.0103519	0.00403509	0.00704236	0.0205168	-0.00951267	0.0193159	0.394787	0.264801	0.0132731	-0.00309896	0.0250981	-0.00227813	0.00575047	-0.00101588	-0.00192951
Lim3	0.00940192	-0.000845738	0.0119369	0.0747814	-0.00345046	0.0117504	-0.0013878	-0.00166811	0.00954364	0.00197621	0.00921032	0.00417597	0.00224918	-0.00699786	0.00860441	-0.00156886	0.0661963	0.00266655	0.00813995	0.0069052	-0.00351226	0.0144367	0.0311092	-0.00643211	-0.00160262	0.01928	-0.00149906	-0.00686749	0.0329677	-0.00382465	0.0687341	0.0618858	0.0401836	-0.00179193	0.0264138	-0.00674802	0.099742	-0.00367249	0.0165836	-0.00442233	-0.00178049	-0.00443452	0.00916227	-0.0010343	0.00228258	0.00425422	-0.00166811	-0.00190775	-0.00523961
M1BP	-0.00374785	0.0408816	0.0115101	0.0142264	0.00791144	-0.00190011	-0.00231711	0.00662122	0.0121218	-0.00857106	-0.0037853	0.0170277	-0.0030212	-0.0222374	-0.0030212	0.0273824	-0.00140226	0.0253268	0.000408685	0.0393823	-0.00586417	-0.00195609	0.000902983	0.0311183	0.0854357	-0.0137828	0.00796285	0.180206	-0.00151702	0.0725867	-0.00289537	-0.00361008	0.00334906	0.0145227	-0.0118111	-0.00838231	0.0207239	0.00091524	-0.0112785	0.0353659	0.271715	0.131154	-0.00892441	-0.0017269	0.035479	-0.00106222	0.0254339	0.00504122	0.00932688
MBD-R2	-0.00559461	0.0708751	0.0359029	0.0470141	0.0184126	-0.00452362	-0.00354428	0.0082265	0.0451978	-0.0144257	0.0034025	0.0284707	0.00223872	-0.0276958	-0.00285131	0.0291821	-0.00129015	0.0216978	-0.00335794	0.0655164	-0.00302581	0.0166355	0.0222522	0.0260638	0.0608879	0.00602551	0.017011	0.287483	-0.00266646	0.070878	0.0240156	0.00428623	0.010771	0.00704867	0.00856547	-0.00817208	0.0304891	0.0161186	-0.00479007	0.0714646	0.31872	0.200903	0.00744135	0.00742349	0.0533754	0.000507879	0.00198318	-0.00487216	0.0066138
MESR4	0.00450432	0.0650736	0.036206	0.016854	0.0203275	0.00560072	-0.00393941	0.00656854	0.0306443	-0.00680959	0.00188607	0.0246502	0.00216794	-0.0270203	0.00907961	0.0436176	0.00620846	0.0199611	-0.000782089	0.13955	0.00348241	0.00841146	0.00811263	0.0645894	0.06604	0.0254181	0.0208982	0.266341	-0.00734269	0.0777272	-0.0078911	-0.00685047	0.0125584	0.0106989	-0.00519586	-0.0294431	0.0210817	0.00551517	-0.00648388	0.190795	0.324483	0.183803	0.00919677	0.00617542	0.0530965	0.0125474	0.000916734	-0.000472449	0.014088
MTF-1	0.162638	-0.00657	0.0107098	0.0020174	0.00589314	0.155269	-0.00118472	-0.001424	0.0538525	0.0541924	-0.00193539	0.0460005	0.00393113	0.0371553	0.0782944	0.0762406	0.0023033	-0.00336805	0.068723	0.0271236	0.0230539	0.0156998	0.00172588	0.0756868	-0.0013681	0.0689537	0.0393144	0.00757334	0.00360529	0.0430963	0.00124977	0.00384745	0.00237171	0.0494214	0.016486	0.0193427	-0.00244432	0.0529675	0.0260938	0.00313378	0.00689289	-0.0037856	0.130551	0.057935	-0.00349397	0.158379	0.0897883	0.110051	0.135745
Mabi	0.0306394	0.00367476	0.0415839	0.00249074	0.00100103	0.011319	0.00854844	-0.00299493	0.0154094	0.00460662	-0.00655035	0.0103966	0.00717074	0.0201579	0.0201532	0.0103691	-0.00188986	0.00376081	0.0312712	-0.00349434	0.000472632	0.0730419	-0.00533097	0.0231204	0.0305888	0.0348368	0.0114484	0.0181936	0.0137215	0.0712251	-0.00704584	-0.0180381	-0.00225106	0.0184503	-0.0210382	-0.0090677	-0.0159077	0.0110485	0.00850091	-0.000401309	0.0512073	0.00400929	0.0211533	0.00851025	0.0170712	0.017053	0.020891	0.00594843	0.0482114
Mad	-0.00238514	0.0254324	-0.00355186	-0.00178478	0.0402438	-0.00215116	-0.000503456	-0.000605142	0.0161228	0.00830155	-0.00082246	-0.00197443	-0.00148956	0.01141	0.0159664	-0.000569138	-0.00173626	-0.00143128	-0.00153184	0.00713053	-0.00127415	0.0236522	-0.00183592	-0.00233339	-0.000581386	-0.00336918	-0.000543816	-0.00249133	-0.00240614	0.0179863	-0.00192316	-0.002367	-0.00261829	-0.00065006	0.0115511	0.00694786	-0.00276069	0.00728091	-0.00245056	0.0146137	0.00593681	-0.00160872	-0.00389573	-0.000375215	0.0160268	-0.00123465	-0.000605142	-0.000692078	0.0118136
Max	0.00766812	0.0155246	-0.00240032	0.00473813	-0.00228679	0.00937783	-0.000919765	0.022364	0.000102825	0.00598626	-0.00150255	0.0253523	-0.00272128	-0.00131853	-0.00272128	-0.00103976	0.00504771	0.0172923	-0.00279852	0.00586087	-0.00232775	-0.000555421	0.00442449	0.00188053	-0.00106214	0.00244581	0.0251193	0.0703533	-0.00439578	0.0415437	0.0113468	-0.00432427	-0.00478335	0.0206625	-0.00297807	-0.000110982	0.000169601	0.0223665	0.00137869	0.0148463	0.0895222	0.0325187	-0.00337227	0.0371501	0.0260801	-0.00225558	-0.00110553	-0.00126436	0.00404391
Med	0.0274714	0.0731007	0.0324529	0.116857	0.11594	0.00584573	0.0229487	0.0287412	0.103427	0.0174739	0.0502711	0.0207326	0.0235471	0.0387976	0.00656178	0.00871482	0.0256344	0.0470788	0.014298	0.0199151	0.0145514	0.00712603	0.130486	0.0121373	0.040957	0.0375646	0.020925	0.00245548	0.00589743	0.0662191	0.0315989	0.0197608	0.0451764	-0.00269581	0.0624079	0.0959414	0.0278865	0.0590481	0.0184266	0.00912777	0.0178633	0.00119754	0.081911	-0.00155602	0.0492208	0.015346	0.0183243	-0.00287005	0.00879827
Mef2	0.0068757	0.0360839	0.0689999	0.0201153	0.00642418	0.00942579	0.0144698	0.0183164	0.0236802	0.0191623	0.000166637	0.0142707	0.120979	0.0280832	0.00231484	0.0158662	0.00280955	0.0178165	0.0112336	0.0220879	0.0078055	0.0510615	0.0115705	0.0462601	0.0239233	0.0796455	0.00329121	0.260593	2.53707e-05	0.0635521	-0.00528798	-0.00448493	0.00533269	0.00448729	-0.0209365	0.0168511	0.000212944	0.015353	0.00529523	0.0217842	0.311893	0.202258	0.0156778	-0.00411406	0.017732	0.0171016	0.0141578	-0.00395135	0.00446389
Meics	0.0790396	0.0492224	0.0270483	0.0705472	0.0502509	0.0785149	0.00534131	0.0244204	0.142877	0.0210944	0.0415667	0.0877005	0.0108583	0.0554586	0.134322	0.0114466	0.011431	0.140482	0.13013	-0.00369406	0.0356849	-0.000885241	0.0609795	0.013181	-0.00360659	0.0862232	0.0358109	-0.00507937	-0.000613457	0.0462305	0.0170585	0.00349725	0.0249411	0.0353128	0.0344888	0.178491	-0.00148035	0.115823	0.041034	0.000718326	-0.00569869	-0.00199852	0.148912	0.0544479	0.0541577	0.0788319	0.0103332	0.0511475	0.128069
Mes2	0.0128222	0.00557357	0.0702364	0.019629	-0.000542968	0.0162956	-0.00217158	0.00741264	0.0366783	0.0242565	-0.00354755	0.0162182	0.14066	0.0224679	0.0262605	0.0401693	0.0205931	0.0193307	-0.00660735	0.00682088	0.0183602	0.0308184	0.00204667	0.0187947	0.0079241	0.0754586	-0.00234566	0.112287	0.0048966	0.014001	0.001224	0.000138604	0.00745933	0.00652729	0.00317912	0.00258711	-0.000776324	0.0141503	-0.000567358	0.000672005	0.132967	0.0952725	0.0311743	-0.00161843	0.0140891	0.0143664	0.00741264	0.00578044	0.00464108
Mrtf	0.00153961	0.00435648	-0.00237467	0.0671333	0.0205232	0.00890462	-0.00272066	-0.00327016	0.0151692	0.00529921	0.0370175	-0.000742064	-0.00149008	-0.00801123	0.00506937	-0.0030756	0.0159777	0.0161509	0.00129185	0.00949292	0.00460461	0.00564448	0.0354108	-0.00418537	-0.00314179	0.0127527	0.00601306	-0.00556203	0.0442193	0.00179887	0.0507389	0.0515875	0.0404202	0.0039776	0.0518077	0.0125627	0.0601405	0.0230086	0.0188755	-0.00866957	-0.0124959	-0.00565462	0.0161774	-0.00202765	0.00184678	0.00518351	-0.00327016	0.00329651	0.00261195
Myb	-0.00688825	0.0774206	0.017344	0.015915	0.033178	-0.00526925	-0.00242652	0.0150676	0.0203438	-0.0113019	-0.00396403	0.032092	0.000151794	-0.0180585	0.00381732	0.0163774	0.0010796	0.0121696	0.00331255	0.00975529	-0.00186048	0.00247394	0.0149935	0.0169991	0.100147	-0.00800005	0.0273935	0.210962	-0.00474479	0.0609725	0.00211801	0.00483891	-0.00210414	0.00523853	0.00393975	0.0119457	0.0166545	0.00393274	-0.00508044	0.00929567	0.230192	0.11791	-0.00586313	0.0126879	0.0737424	-0.00153396	0.0060755	0.00452857	-0.00340153
Myc	0.00558452	0.00275068	0.00949525	0.0165832	0.00420808	-0.00141117	-0.0013746	-0.00165223	0.0063069	-0.00701544	0.00934128	0.0140297	-0.00406697	-0.0108486	0.00234882	0.0319127	0.033845	0.00944207	-0.00418241	0.0143198	-0.00347883	0.0082078	0.0262856	0.0348275	0.0147938	-0.00343101	0.0160268	0.0782059	0.0134194	0.0313866	0.0196628	0.00572485	0.0149372	0.027531	0.00270088	-0.00911395	0.0099423	0.00372619	0.00508976	0.0254238	0.100646	0.0431644	0.00192012	0.0243486	0.00881854	-0.00337099	0.0140867	0.0118751	-0.00518974
NC2alpha	0.0356217	0.00834078	0.0139917	-0.00155778	0.0226755	-0.00187757	-0.000439424	-0.000528177	0.0300544	0.00347672	-0.000717856	-0.00172331	-0.00130011	-0.00224307	0.0186969	0.0516582	-0.00151543	0.0403602	0.0570118	0.0201319	-0.0011121	0.00757566	0.0146562	0.0108042	-0.000507443	-0.00294067	-0.000474651	-0.00217447	-0.00210012	0.00584448	-0.00167857	-0.00206595	0.00918774	-0.000567382	0.00828433	0.0100887	-0.00240957	0.00906167	-0.00213889	-0.00140026	0.00191062	-0.00140412	0.020082	-0.000327494	-0.00129595	-0.00107762	-0.000528177	-0.000604056	0.0140517
NC2beta	0.0652463	0.0111642	0.0161958	0.00949097	0.035336	0.0398547	-0.00109976	0.0183218	0.0286125	0.0223873	0.0126649	0.00780632	0.0127612	0.0217772	0.0127612	-0.00124323	0.00308705	0.00520445	0.0589604	0.043637	-0.00278327	0.00980196	0.0155212	0.0411803	0.0396205	-0.000160795	-0.00118792	0.00420315	0.0446399	0.0702342	0.00823683	0.0100406	0.0356284	0.090021	0.00435727	0.0134043	0.0026961	0.0260931	0.00444911	0.0411334	0.0491686	0.0113247	0.0259683	0.0308483	0.0369217	0.0744908	0.0968964	-0.00151178	0.0524683
NFAT	-0.00187042	0.0291025	0.0449611	0.0528301	0.0255871	0.00283895	0.00732859	-0.00316971	0.0659738	0.0166073	0.0262174	0.0408211	0.00233912	0.000121272	0.0124805	0.023469	0.0199493	0.0206391	-0.00144786	0.0163698	0.0130644	0.0153937	0.0508504	0.00514363	0.0142171	0.0826425	0.0156051	0.001202	0.0168865	0.00285321	0.0424343	0.0368337	0.0638655	0.00431559	0.0816241	0.00911124	0.024222	0.0322801	0.0264759	-0.00526252	0.0141053	0.00410231	0.0378159	-0.00196536	0.0159614	0.00167938	0.00512309	0.0108801	0.0219144
NK7.1	0.043794	-0.00136206	-0.00173277	-0.000870701	-0.000610655	0.0238262	-0.000245611	-0.000295218	0.0180088	-0.00207848	-0.000401236	-0.000963224	-0.000726681	0.00408674	-0.000726681	-0.000277653	0.0298823	-0.000698249	0.0340403	-0.00130527	-0.000621593	-0.00144688	-0.000895653	0.0218288	-0.000283629	-0.00164365	-0.0002653	-0.00121539	-0.00117383	0.00691929	-0.000938214	-0.00115474	-0.00127733	0.163056	-0.00240286	0.00374942	-0.0013468	0.0190443	0.0206958	-0.000782656	-0.00242257	-0.000784813	0.0400999	-0.000183048	-0.000724353	0.0424939	0.175187	-0.000337629	0.0552733
Neu2	-0.00251369	-0.000753666	0.00120369	0.00580537	0.0193758	-0.00589223	-0.00137901	0.0140314	-0.000686741	-0.00246506	-0.00225279	-0.000568434	-0.00408004	0.00572207	-0.00408004	-0.00155892	0.000738943	-0.00392041	-0.00419585	0.0142276	-0.00349001	0.00487925	-0.00502876	0.00592889	0.0147367	-0.00347889	0.0159664	0.035545	0.0173198	0.0172527	-0.00526772	0.00161577	0.000166859	-0.00178057	-0.0054424	-0.00381535	-0.0040769	0.0073041	0.00111645	0.0193732	0.0263427	0.00151927	-0.00566404	-0.00102775	0.00876462	-0.00338182	-0.00165754	-0.00189566	0.00986741
Nf-YA	0.0362895	0.0206471	0.107456	0.0333991	0.0124406	0.0419545	0.0404208	0.00950027	0.0260109	0.0307701	0.0487683	-2.58379e-05	-0.000697341	0.00858713	0.00886206	0.0228396	0.0141486	0.0046828	0.0315584	0.0170127	0.00647837	0.181023	0.0437693	0.0129049	0.0100661	0.0176909	-0.00199958	0.0196259	0.0149791	0.0177877	0.000352791	0.00340275	0.0232802	0.00852603	0.0059509	0.0127051	-0.00494198	0.0337589	0.0202441	0.00298256	0.050403	0.0162281	0.0361905	0.017523	0.0137202	0.0300154	-0.00222508	-0.00254473	0.00427655
Nf-YB	0.0611398	0.0399911	0.108209	0.00959734	0.011343	0.0420175	0.000333077	0.0163651	0.0245757	0.0539694	-0.00165958	0.0438595	-0.000336439	0.0505303	0.0216275	0.0229193	-0.00330689	0.0160752	0.0504642	-0.00428492	0.0277984	0.182293	0.0127892	0.0458797	0.0128468	0.0492171	0.00452293	0.00581262	0.016862	0.0893929	-0.00512442	-0.00410012	0.00412417	0.010184	-0.0086429	0.0460349	-0.00382522	0.021288	0.00672471	-0.0110313	0.0460914	0.0109571	0.0740231	0.025181	0.0273006	0.0691848	0.0253453	0.0126748	0.0542243
NfI	0.0581278	0.0710336	0.0510645	0.0940091	0.0748684	0.0257819	-0.00197915	-0.00237889	0.110225	0.0154578	0.045261	0.0633585	0.00757029	0.049066	0.0523234	0.0094349	0.0123997	0.0735271	0.0984457	0.0146227	0.0106698	-0.00028525	0.105581	0.0339338	0.00914114	0.0792932	0.0222924	0.000987524	0.00448432	0.0516125	0.0132939	0.0161991	0.0256544	-0.00255547	0.0242877	0.124406	0.00865619	0.0735709	0.0287148	0.0269569	0.00144267	0.00196916	0.135338	0.0339227	0.0570172	0.102995	0.00859976	0.0356855	0.0663652
Oaz	0.0183084	0.00473543	-0.000733607	0.12526	0.0144595	0.00370188	0.0137372	-0.00202996	0.0105092	0.0139506	0.0444919	0.00129637	0.00546861	0.00764473	-0.00499677	-0.00190919	0.0661076	-0.00480127	0.0101298	-0.00015665	-0.00427417	0.0219678	0.074676	0.00225295	-0.00195028	-0.00659771	0.0124581	0.0042486	0.0473582	0.00340281	0.107338	0.0550137	0.0602673	-0.00218064	0.0542712	0.0125125	0.084832	0.0268322	0.0430231	-0.00538166	-0.0133897	-0.0053965	0.0176552	-0.00125867	0.0107673	0.00846838	-0.00202996	-0.00232159	0.0100682
Oli	0.0866421	0.0812548	0.0109805	0.0767497	0.060273	0.0554719	0.0238677	0.0011334	0.0818207	0.0460468	0.0616354	0.00978799	-0.0020025	0.194963	0.0144543	0.00790515	0.0129629	0.0819858	0.136901	0.00988762	0.0149521	0.00357854	0.133124	0.0153444	0.0195586	0.024926	0.0407537	-0.00916619	0.0328473	0.258553	0.0144869	0.0176021	0.0244622	0.0111302	0.0148012	0.29245	0.00063769	0.1201	0.0546206	-0.00573226	-0.0115954	-0.00578396	0.0805976	0.0343171	0.0570258	0.0868595	0.0184353	0.0199198	0.0667155
Opbp	-0.00683681	0.0491018	0.0447135	0.0398694	0.0110721	-0.00566576	-0.00370783	0.0075087	0.0178248	-0.00241918	-0.00165281	0.00945081	0.179255	-0.00684384	-0.00121513	0.0212512	0.0165473	0.00214544	0.000578503	0.0172856	0.00485609	0.0475756	0.0162218	0.015702	0.0393061	0.00478567	0.0159645	0.231346	0.0111525	0.0430889	0.0275053	0.0119083	0.0324881	-0.00478754	0.0297146	0.00537614	0.0341528	-0.00282721	-0.00162828	-0.000486101	0.225421	0.180224	-0.00291654	-0.00276337	0.0135304	-0.00321578	0.0134914	-0.00509699	-0.00825066
Optix	0.0128807	0.00330086	0.00301039	0.0486271	0.0372713	0.00692201	-0.00199459	0.00849765	0.0491042	0.0262685	0.0689293	-0.00446138	0.00298119	0.01544	0.00742244	-0.00225481	0.0160159	0.00819155	0.0198493	0.0193392	0.000138531	0.0108245	0.0830009	0.00501514	0.00903635	0.00861225	-0.00215449	-0.00719534	0.0541179	0.0218419	0.0268732	0.035618	0.0431374	0.00756791	0.0363807	0.0141186	0.0398837	0.0198279	0.00931962	-0.0063559	-0.000256091	-0.00225835	0.0349808	-0.00148653	0.0119392	0.0218656	0.00849765	-0.00274187	0.00642674
PHDP	0.17989	0.0579447	0.0299346	0.0376233	0.0344178	0.160679	0.0267976	0.0103391	0.149886	0.0492396	0.0310659	0.131637	0.00831384	0.166741	0.11178	0.028152	0.0122907	0.0953447	0.120329	0.0125913	0.0285031	0.00348952	0.0820794	0.0545213	0.00578609	0.121012	0.0241431	0.00402305	-0.00357439	0.178593	0.00807041	-0.00830923	0.0126306	0.0715737	0.00882525	0.226955	-0.00991902	0.123739	0.0719918	0.00386853	0.00677871	-0.00404343	0.226048	0.0385288	0.0507877	0.129324	0.0414189	0.0484147	0.126334
Pdp1	0.0469539	0.0293056	0.0362052	0.0344003	0.029698	0.0537428	0.0138497	0.0400301	0.0564392	0.058166	0.00907943	0.0677362	0.002146	0.0868643	0.0583996	0.0142301	0.00285543	0.0331143	0.0283092	0.0203195	0.018719	0.017372	0.0240788	0.0385525	0.0100089	0.144872	0.000245589	0.0582766	-0.0039626	0.0580896	-0.00552874	-0.0172075	0.00698421	0.0136001	-0.0159804	0.0359613	-0.0155027	0.0502308	0.018158	0.0264211	0.0744364	0.0327443	0.0931922	0.000434294	0.0234452	0.0305751	0.0331301	0.00864583	0.0469486
Poxn	-0.00477418	-0.00558851	0.00035652	0.0986716	-0.0025055	-0.00430584	0.0247435	-0.00121127	0.0038961	-0.00538489	0.0141292	0.00265816	-0.00298156	-0.00941258	0.00575353	-0.00113921	0.0640685	-0.0028649	-0.00306618	0.0044586	-0.00255038	0.0162633	0.0247335	-0.00467059	-0.00116372	-0.00281736	-0.00108852	0.000274091	0.0387275	-0.00681671	0.104694	0.0726974	0.0448756	-0.00130118	0.039611	-0.0137811	0.0944289	-0.00529028	0.0432125	0.00490442	-0.00993976	-0.00322007	-0.00437865	-0.000751043	-0.00297201	0.00805385	-0.00121127	-0.00138529	-0.00380467
Ptx1	0.0475836	0.0755474	0.00572321	0.162823	0.0824201	0.0222838	0.0190908	0.00203499	0.0885318	0.0272099	0.0958461	-0.000282545	-0.00276118	0.0898883	0.00235346	0.00268351	0.0185991	0.0671331	0.0663776	0.0143019	0.0179533	2.46266e-05	0.184668	-0.00156404	0.00898687	0.0281309	0.0450514	-0.0128292	0.0309521	0.128035	0.0480991	0.0336195	0.0652932	0.0071281	0.0612502	0.205794	0.0377965	0.145775	0.0391843	-0.00410888	-0.0204062	-0.00889826	0.073816	0.00748555	0.0563025	0.0406545	0.014582	0.00612574	0.0308885
REPTOR	0.00552026	0.0367032	0.0474428	0.0430757	0.0338384	0.00401607	-0.00165969	0.0371836	0.0830705	0.0146878	0.0549743	0.0619769	0.0110602	0.00865414	0.0323543	0.0397775	0.0125715	0.0617447	0.0156615	0.0151043	0.01445	0.0226938	0.037231	0.00256316	0.0252682	0.0750405	0.0127376	0.0334674	0.00201948	0.0403775	0.0101979	0.00230964	0.0188575	0.0100154	0.0189369	0.0316361	0.00250236	0.0457641	0.0147298	0.0194414	0.0551169	0.0390897	0.0350848	0.0198165	0.0645319	0.0151734	-0.0019949	0.0319826	0.0355588
REPTOR-BP	0.0860974	0.0283769	0.0421157	0.0140916	-0.00213447	0.0604752	-0.000858503	-0.0010319	0.05629	0.0296072	-0.00140248	0.0431611	-0.00254003	0.027193	0.0896863	-0.000970505	-0.0029607	0.0828498	0.146891	0.00695077	0.00979405	0.0053599	0.0218643	0.0289223	-0.000991391	0.0403176	-0.000927326	0.00192335	0.00228229	0.0180461	0.00467906	0.00894109	0.0249318	0.0925067	0.00449762	0.0321616	-0.00470758	0.0304476	0.0146373	0.00678499	-0.00526766	-0.00274322	0.0775908	0.0804123	-0.00253189	0.0966735	0.0241065	0.0867605	0.125574
Rfx	0.0492756	0.0561591	0.0903582	0.10739	0.086459	0.0251811	0.00183181	0.00506213	0.178221	0.0311088	0.0838534	0.0670957	0.00390394	0.0473087	0.0521756	0.011498	0.0318625	0.0662257	0.0684009	0.0039709	0.0330938	0.0330158	0.149639	0.00542018	0.00032912	0.123686	0.0239378	0.00751973	0.0184177	0.0374238	0.0485618	0.00477306	0.0784972	-0.00083034	0.0795524	0.124499	0.0195748	0.11793	0.0404597	-0.0119289	0.0206168	0.00941842	0.151141	-0.00324599	0.0566352	0.0449541	0.0153593	0.0255324	0.0429172
RunxB	-0.00457499	0.0135454	0.0504891	0.0138601	0.00488204	-0.00598421	-0.00209078	0.00788947	0.0183053	0.0067198	-0.00341556	0.0270991	0.074383	-2.38364e-05	0.0150164	0.0086962	0.00736262	0.0249385	0.00188729	0.00556376	0.00461259	0.0286358	-0.000728862	0.00392466	0.0300667	0.0203186	-0.00225839	0.265473	-0.00470775	0.00485636	0.00518658	-0.00445964	0.00858999	-0.0026996	-0.0111153	-0.00195484	0.0139523	0.0107209	-0.00239054	0.00515685	0.187286	0.248706	0.00871936	-0.00155821	0.0151038	0.00509162	-0.00251307	0.0062236	-0.00123055
Rx	0.0211264	0.0155808	-0.0032333	0.101947	0.0141736	0.00706787	-0.00171041	-0.00205587	0.0129411	0.00783838	0.0438685	0.00502375	0.000106997	0.0203791	-0.00506055	0.0115441	0.0562582	-0.00486255	0.0149002	0.0228425	-0.00432873	0.0161902	0.0693896	0.00534583	0.024413	0.000168035	0.0263615	0.00398499	0.062665	0.0253877	0.129919	0.0344959	0.0474363	-0.00220848	0.0515531	0.0160643	0.061016	0.0145234	0.0549316	0.00415182	-0.000732854	-0.000677364	0.0130604	-0.00127474	0.0208757	0.0144851	-0.00205587	-0.00235123	0.00166224
Scr	-0.00700628	0.0339251	0.0251093	0.0187644	0.00293891	-0.00685152	-0.00304166	0.018018	0.013506	-0.00772528	0.00566853	0.0125866	0.182429	-0.0168056	-0.00016411	0.0196049	-0.00289886	0.00360891	-0.00352582	0.0318137	-0.00425866	0.0105237	-0.00630287	0.0142697	0.019046	0.00347381	-0.0032855	0.444337	-0.0016911	0.0420591	0.00210449	-0.00870592	-0.000611335	0.00279878	-0.00937195	-0.00733725	0.0346735	0.00412384	-0.0112001	0.036823	0.383869	0.32046	-0.00739732	-0.00226689	0.0176195	0.00318653	0.0107934	0.00213722	8.53372e-05
Sidpn	0.0263875	-0.00106672	0.0584269	0.0134866	0.0341353	0.0132816	0.00865957	-0.00285471	0.0132354	0.00683801	-0.0038799	0.0105135	0.0266605	0.00586273	0.0079453	0.0168399	0.0046729	0.00882503	0.0146172	0.0210215	0.00710255	0.00693705	0.00959895	0.0154316	0.0354853	0.0127092	0.00765103	0.344427	0.000310944	0.0175726	-0.000351438	0.000684404	0.00482865	0.0396768	0.000318217	0.00192814	0.0196101	0.000299723	-0.00239646	-0.000612949	0.224385	0.308012	0.0182508	-0.00177005	0.0230354	0.00770595	0.052239	0.00476568	0.0175
Six4	0.0105434	0.0139886	-0.000646283	-0.002755	-0.00193219	0.0124213	-0.000777142	0.0268282	-0.00428967	0.00156763	-0.00126956	0.00551633	-0.00229931	0.0375097	-0.00229931	-0.000878529	0.0264893	-0.00220934	0.0196498	0.00222743	-0.00196679	0.00692654	0.00636735	0.0109323	0.0568929	-0.000113626	0.0300496	0.00978596	0.024493	0.0712044	0.00582055	0.00351222	-0.00404162	0.0248432	-0.00404228	0.0214295	0.0019052	0.0216556	0.0169973	0.00803801	0.00647142	-0.00248324	-0.00158369	-0.000579187	-0.00229194	0.0117303	-0.000934105	-0.0010683	0.0059572
Sox100B	0.176407	0.0656349	0.0112695	0.00815213	0.0140827	0.207319	0.00758835	-0.00310393	0.0585934	0.0762167	0.0269348	0.0603638	0.00960971	0.151615	0.0510099	0.0420714	0.0148073	0.0680355	0.112944	0.0269762	0.0216667	0.000569968	0.0438789	0.0744317	0.0146355	0.06181	0.0913768	-0.000311805	0.0048563	0.164824	0.006212	0.00533551	0.00438474	0.0675805	-0.00138325	0.167005	-0.00664064	0.0590142	0.0465557	0.0238247	-0.000690692	0.00133832	0.127216	0.0935837	0.0166112	0.135006	0.0730669	0.0334592	0.152882
Sox102F	0.15759	0.0787902	-0.00752573	0.0842295	0.0739227	0.112588	0.0239895	0.00865739	0.080444	0.0511392	0.0661623	-0.0023138	-0.000343001	0.26469	0.00939721	-0.000260502	0.00713712	0.0615567	0.120149	0.0197581	0.0153411	-0.00605005	0.152243	0.00812348	0.0194131	0.0165422	0.0533841	-0.0104752	0.0259729	0.260323	0.0137227	0.0123243	0.0246051	0.0428394	0.0181316	0.361851	-0.00149436	0.126921	0.048541	-0.000576926	-0.0240943	-0.00968269	0.0854429	0.034999	0.0427387	0.0682196	0.0325516	0.00604321	0.0632777
SoxN	0.00467749	0.00927033	0.0506305	0.0219753	-0.000305282	0.00807389	-0.00298759	0.0111098	0.0110871	0.104094	0.000530666	0.0427019	0.0780534	0.0326612	0.0121348	-0.00337736	0.00514263	0.0102105	0.00548122	0.00600449	-0.000562933	0.0524579	-0.00115007	0.018862	0.00420029	0.036575	-0.00322709	0.205373	-0.00120917	0.0121967	0.0118579	0.00113197	0.0119681	-0.00385757	-0.00660282	-0.00643893	0.0162713	0.011571	0.000129295	0.00161508	0.176389	0.193119	0.0108945	-0.00222659	0.00922409	0.010725	0.00375938	0.00874988	-0.00186329
Spps	0.0884376	0.00468356	-0.00671709	-0.00337527	0.0196056	0.0923622	-0.000952109	-0.00114441	0.00475341	0.031854	-0.00155539	0.00326088	-0.00281698	0.102165	-0.00281698	-0.00107632	0.0125995	0.00690989	0.0600349	0.0312878	-0.0024096	-0.000910543	0.00404327	0.0608774	-0.00109949	0.00193826	-0.00102844	0.000855413	0.0300073	0.119959	-0.00363698	-0.00447634	0.00565487	0.0198812	0.00231817	0.0399271	-0.000184197	0.0212763	0.012338	0.0141416	0.010815	0.0140865	0.0324317	0.0358455	0.0157375	0.0199401	0.112232	-0.00130882	0.112598
Sry-beta	0.0243476	0.0103975	0.0176572	-0.00254758	-0.00459432	0.028736	-0.00184787	0.00952494	-0.00242281	0.0274343	-0.00301874	0.0108701	-0.000679115	0.0232596	0.00410902	0.0103992	-0.00225893	0.00969131	0.0130059	0.0224573	-0.00467661	0.00615065	0.00494049	0.031406	0.0100914	0.00700462	-0.00199601	0.0283442	0.000119228	0.0465813	-0.0033401	-0.00565591	0.00137844	-0.00238597	-0.0075327	0.0219358	-0.0075237	0.0011877	-0.00313322	0.0119059	0.0550427	0.0207142	0.00631765	-0.00137718	0.00415705	0.0127765	0.021271	0.0180052	0.0344036
Sry-delta	0.00878799	0.0769353	0.0076007	0.0183796	0.0377308	0.014804	0.0129808	0.0163534	0.0177933	0.00412033	0.00462234	0.0330721	-0.00138482	0.000777756	0.00687939	0.032237	-0.00177999	0.0337187	0.00883243	0.135872	0.00461415	0.000390958	0.0217035	0.0414905	0.0525024	0.0041791	0.00399618	0.337245	0.00329527	0.0720708	0.000378748	-0.00312271	0.00990779	0.0524125	-0.00590401	0.00822193	0.0136391	0.0188997	-0.0040717	0.171324	0.33087	0.224401	0.00711302	0.00846381	0.0760509	0.0152371	0.0163534	0.00142702	0.0223157
Stat92E	0.0198621	0.0358242	0.0312964	0.00836274	-0.000828141	0.0209618	0.031013	0.00337162	0.00951985	0.0591281	0.000161853	0.00973784	0.0197591	0.0754373	0.00240245	0.0417655	-0.00571642	0.000218963	0.0215207	0.0290328	-0.0044646	0.0185038	-0.00424468	0.0543674	0.00380742	0.0143707	-0.00334734	0.0386739	-0.000390206	0.0707585	0.0016422	-0.00174752	0.00214038	0.00921224	-0.00483297	0.00451644	-0.00753514	0.00675581	-0.00269	0.0385026	0.100425	0.0383436	0.00432875	-0.00230956	0.0169787	0.013314	0.0104681	0.00194637	0.015573
Su(H)	-0.0230348	-0.0222189	0.0278976	-0.00928042	-0.000986691	-0.0101718	0.0056689	0.00521765	0.0184326	-0.0349091	-0.00307797	0.013615	-0.00600154	-0.0667399	0.0066868	0.00980263	-0.00560679	0.00257681	-0.0124966	-0.0309168	0.0116874	0.00610935	-0.0232379	0.0058002	0.0115305	0.0307709	-0.00719669	0.0443155	-0.0268319	-0.0279197	-0.013214	-0.0217595	-0.00934367	-0.00382599	-0.0320599	-0.0834872	-0.0274168	-0.000943602	-0.00327177	-0.0197194	0.0648559	0.0262532	-0.00490881	0.00293826	0.0128021	0.00449378	-0.00914842	0.000812739	-0.00390241
TFAM	0.0417311	-0.00211029	-0.00268464	-0.00134901	-0.000946108	0.0626085	-0.000380533	-0.000457391	0.0229013	0.0133958	-0.000621649	-0.00149235	0.0450528	0.0243845	-0.00112587	0.05979	-0.00131234	-0.00108182	0.0437568	0.0109484	0.0260004	-0.00224169	-0.00138767	0.0130629	-0.000439436	-0.00254656	-0.000411038	-0.00188305	0.0125686	0.0396445	-0.00145361	-0.00178907	-0.00197901	0.0522419	0.00354177	0.00873661	-0.00208664	0.0111289	0.0122798	0.0202393	0.0034572	-0.00121594	0.0422448	-0.000283603	-0.00112227	0.0268878	0.112826	-0.000523101	0.0529842
TfAP-2	-0.00290518	0.0180303	0.0341551	0.0190132	-0.000725416	-0.00107059	-0.00221091	-0.00265746	0.00953106	-0.00426495	0.00363827	0.00955694	0.0576901	-0.0165715	0.0095165	-0.00249935	0.00272252	0.0145977	-0.00672703	0.0310987	-0.000907348	0.0216644	-0.00153446	0.00522008	0.0384467	0.00324973	0.0085691	0.487119	-0.00556355	0.0270827	0.000907808	-0.00531066	0.00232137	0.00631384	-0.0127883	-0.00968321	0.0272512	0.00208704	-0.0107616	0.022793	0.348028	0.379776	0.00332001	-0.00164775	0.0136159	0.00425236	-0.00265746	0.00557357	0.00111476
Trl	0.0590168	0.00158596	0.0323496	0.00646865	0.0639809	0.0506417	-0.000792553	0.0262713	0.0376836	0.0172518	-0.00129474	0.0052898	0.0087526	0.0290947	0.0087526	-0.00089595	0.00680132	0.00929262	0.0623509	0.0144906	0.0109537	0.0348164	0.0332013	0.010579	-0.000915232	0.0146499	-0.000856088	0.00944533	0.0307873	0.0362296	-0.00302749	0.00330079	0.0340806	-0.00102334	0.0271624	0.0228863	-0.00434594	0.0336937	0.030104	-0.00252553	0.0303047	-0.00253249	0.0720575	0.0432974	0.00879547	0.0515432	0.0807191	-0.00108949	0.0754773
Usf	0.0151944	0.0269103	0.00906862	0.0211216	-0.000819322	0.0171341	-0.000329538	-0.000396097	-0.00181898	0.0163972	-0.000538343	-0.00129237	-0.000974995	0.000851063	-0.000974995	-0.00037253	-0.00113647	0.0268003	0.0249278	0.0431789	-0.000833997	0.025161	0.0421506	0.0155923	0.0676899	-0.0022053	-0.000355956	0.0144258	-0.00157494	0.00347542	-0.00125881	0.015332	-0.0017138	0.0604633	-0.00322394	0.0117912	-0.00180701	0.0134267	-0.00160402	0.0732587	0.00507534	-0.00105299	-0.00254996	-0.000245598	0.0257733	-0.000808143	-0.000396097	-0.000453001	0.0197016
Vsx1	0.120071	0.0368749	0.027321	0.010789	0.00778079	0.126706	0.0205657	0.00262711	0.0737809	0.141957	0.00432121	0.113707	0.0117662	0.104435	0.0685021	0.0173767	0.00477003	0.0242679	0.0555669	-0.00402876	0.0231268	0.0174707	0.0164189	0.0643782	-0.00384356	0.139247	0.0111531	0.00305542	-0.000755793	0.036083	-0.000124634	-0.000251715	0.00904167	0.0635767	-0.0121611	0.0500105	-0.0153067	0.0393574	0.0135642	-0.00558584	0.0161064	-0.00312546	0.121242	0.0082041	0.00915625	0.0536897	0.0357657	0.0359993	0.0808292
Xbp1	0.0404958	0.0710975	0.00553883	0.0715318	0.0938094	0.0141964	0.0286915	0.0105906	0.0603399	0.0151846	0.0437668	0.0127906	8.5822e-05	0.0695113	0.0103997	0.0115124	0.0162423	0.0165883	0.0499584	0.016964	0.00770664	0.00300914	0.127921	0.011925	0.0243547	0.0163469	0.0403752	0.0101534	0.0335821	0.115134	0.0254931	0.00500325	0.0354671	-0.00221308	0.0465103	0.10746	0.0158915	0.0730918	0.0263771	0.0280768	0.0201348	-0.000698603	0.031146	0.0191171	0.0621988	0.0206517	0.0232413	-0.00235613	0.0299931
Xrp1	0.148174	0.0671054	0.00244364	0.0542171	0.069047	0.121585	0.0221061	0.00597913	0.0628073	0.0724774	0.0494892	0.00243521	0.00565894	0.233955	0.00788089	0.0185511	0.0164209	0.0160979	0.0826292	0.0481357	0.00779894	0.0120155	0.0898466	0.0509327	0.0406565	0.00555375	0.0440939	0.00114573	0.093959	0.333571	0.0223204	0.00607095	0.0258701	0.0454589	0.00607488	0.189105	0.00417983	0.114927	0.0603043	0.00140067	0.000545801	-0.00279217	0.0778978	0.0320971	0.0258157	0.0649211	0.087741	0.0277399	0.118957
ZIPIC	-0.00423087	0.0322174	0.0105413	0.0133084	0.0211999	-0.00381583	-0.000893053	-0.00107343	0.000404646	-0.00755748	0.0163341	0.0114089	-0.00264225	-0.00910561	-0.00264225	0.0503823	-0.00307985	0.00771132	-0.00271725	0.00632318	-0.00226014	-0.000253131	0.00475373	0.00851392	0.024124	-0.00154774	-0.000964645	0.0905188	0.00187094	0.0219393	-0.00341139	-0.00419869	0.00666074	-0.00115311	0.000562485	0.00697086	0.0112084	-0.00468823	-0.00434691	0.00630776	0.0865706	0.0427894	0.000802493	-0.000665574	0.027017	-0.00219008	-0.00107343	-0.00122764	0.00436877
Zif	0.0409197	0.085296	0.00289407	0.0150473	0.0314216	0.0426657	0.0165034	0.0179476	0.0145906	0.00416608	0.0102718	0.0055742	-7.06142e-05	0.136805	0.00685992	0.0196607	0.00233235	0.0369032	0.0599508	0.055694	0.00085032	0.0156107	0.0326336	0.0604183	0.0544489	-0.0107095	0.0462012	0.144741	0.0675978	0.348719	0.00473137	0.00640057	0.0113827	0.016033	-0.0115344	0.155842	0.00111993	0.0555546	0.0331977	0.0668983	0.184184	0.0859122	0.00487235	0.0244813	0.0556244	0.0376885	0.0122804	0.0144259	0.0632156
ab	-0.00137681	0.0472655	0.0108684	-0.00103025	0.0352071	-0.00124175	-0.000290618	-0.000349315	0.0311287	0.0192948	-0.000474762	0.021736	-0.000859843	0.0022095	-0.000859843	-0.000328532	-0.00100225	-0.0008262	-0.000884248	-0.00154446	-0.000735497	-0.00171201	0.0235181	-0.00134694	-0.000335603	-0.00194484	0.0821946	-0.00143811	-0.00138893	0.00489434	-0.00111014	-0.00136634	-0.00151139	-0.000375244	0.00666781	-0.00450662	0.0148782	0.0328455	-0.00141457	-0.000926075	0.00657374	-0.000928627	-0.00224879	-0.000216591	-0.000857089	-0.000712697	-0.000349315	-0.000399499	0.0226525
abd-A	0.00924614	0.0634041	0.0957404	0.0136957	0.00739054	-0.000945294	-0.00602457	0.0107385	0.0199797	0.130316	0.00698431	0.0370547	-0.010806	0.0754408	0.00708247	0.00112739	-0.0052476	0.0467836	0.0238373	-0.0350875	0.00382954	0.0377235	0.0160072	0.0120824	-0.0107633	0.0813592	-0.00701613	-0.0232285	-0.0187687	0.0037763	-0.00347664	-0.0140871	-0.00164641	0.00328603	-0.00535403	0.133071	-0.0169929	0.0222587	-0.000887942	-0.0265843	-0.010581	-0.0183874	0.0797357	0.00631825	0.0140108	0.00677997	-0.00571766	0.00397816	0.0104868
ac	0.0590128	0.00692191	0.00557921	-0.00382753	0.00533586	0.0375828	0.0171002	0.00502392	-0.00561286	0.0245174	-0.00434634	-0.00789774	-0.00116862	0.0518393	-0.00787168	0.0144749	0.00810173	-0.000589862	0.0603605	0.0141023	-0.00281945	0.0439513	-0.00425211	0.043625	0.0225996	-0.013285	0.00627399	0.00701945	0.0520247	0.104524	-0.00756017	0.00234685	0.0034696	0.0501463	-0.00599332	0.00902771	-0.014589	0.0146138	0.00756326	0.00086355	0.0355102	0.0070255	0.0174576	0.0112717	0.0123268	0.0298207	0.0790204	-0.00365733	0.0847489
al	-0.00378715	0.0128285	0.00604367	0.127548	0.0164044	0.0131276	-0.00155339	-0.00186714	0.0714332	0.00526038	0.0693149	0.0197146	0.00677136	0.00510903	-0.00459598	-0.00175605	0.0288253	0.0192369	0.00632976	0.00770904	0.00934331	0.00529385	0.0682734	-0.00719958	-0.00179385	0.0330372	0.0138353	-0.000840773	0.0386165	0.00228021	0.0867631	0.0502795	0.0408354	0.0109751	0.042027	0.0443719	0.0534227	0.0435449	0.00983265	0.000330611	-0.0117719	-0.00496365	0.0235761	-0.00115771	0.0182259	0.00303896	0.0120758	0.0100586	0.0119969
amos	-0.0121888	0.0769741	0.0538938	0.0457816	0.015795	-0.00977515	0.00314764	0.0302289	0.0237091	-0.00940897	0.0108403	0.0225913	0.244242	-0.0219199	0.0123365	0.0203595	0.0132272	0.0161976	-0.0070456	0.0394744	-0.00416235	0.031573	0.0225947	0.0172055	0.0318308	0.0148002	0.0152413	0.297446	0.0185658	0.0262708	0.0368343	0.0194603	0.0248929	0.000461184	0.026575	0.00163829	0.047347	-0.00260933	0.000193618	0.0405659	0.250447	0.207025	1.58707e-05	0.00650521	0.0290657	0.00486778	0.00700844	0.00489101	-0.00515858
aop	-0.00636383	0.0208535	0.0354075	0.044631	0.0122644	-0.00117416	-0.00134328	0.0144884	0.010355	0.00752798	0.00966041	-0.000300588	-0.00397432	0.011231	-0.00397432	0.0156018	0.0630439	-0.00381882	0.00229738	0.00392382	0.00426599	0.052144	0.0217867	-0.00201063	-0.00155121	0.0146159	-0.00145096	0.00125957	0.0467532	0.0221116	0.0815343	0.0103104	0.0382075	-0.00173444	0.0302295	0.00552513	0.0176719	0.00414365	0.0537267	-0.00428045	0.0154496	0.00787188	-0.000116577	-0.00100112	-0.00396159	-0.00329419	-0.00161459	-0.00184654	0.00524289
ap	0.0241074	0.0284844	0.00300966	0.0308877	0.0256568	0.0323451	0.0166864	0.0284343	0.0453275	0.0188204	0.0198584	-0.000976778	0.00190074	0.0212105	-0.00424632	-0.00162245	0.0689891	-0.00408018	0.00161196	0.0269047	-0.00363224	0.0134167	0.0847282	0.00913725	0.0140377	0.00144805	0.0152278	-0.00339994	0.019953	0.0303884	0.0565799	0.0166064	0.0489648	0.0262252	0.0343103	0.0310024	0.035674	0.0274123	0.041925	0.00113773	-0.00263816	0.00110958	0.0297989	-0.00106963	0.00193393	0.00388713	0.0133546	-0.00197292	0.00906986
apt	-0.0068546	0.0103276	0.0598332	0.00984159	0.0070769	0.00242687	-0.00242142	0.0331319	0.0124867	0.0151933	-0.00395569	0.00996085	0.062624	-0.00278745	-0.00349111	0.00684255	0.00111661	-0.00688386	-0.000222468	0.00363877	-0.00183877	0.0454791	-0.00584363	0.00764633	0.0347169	0.0300257	-0.00261553	0.280022	0.00902612	0.00819888	0.00501353	0.00257049	0.0126956	-0.00312652	0.000579579	-0.0119349	0.0187455	0.00190561	-0.0072899	0.00252175	0.203235	0.264526	0.00858039	-0.00180463	0.0186522	0.00733919	-0.00291048	0.00455175	-0.00337043
ara	0.0654939	0.0312719	0.00666786	0.0447679	0.0474272	0.0633827	0.0139954	0.00339235	0.0284335	0.0541266	0.0368211	-0.00116312	0.0198318	0.0814239	-0.000455924	0.0116217	0.0217047	-0.00276199	0.044149	0.0324073	0.0192489	0.0245017	0.0429194	0.0377758	0.0334283	0.0144777	0.0283016	-0.0100682	0.0592621	0.111282	0.0241997	0.0276682	0.0304747	0.0224836	0.0290142	0.0549311	0.0146257	0.0496711	0.0328411	-0.00447009	0.0111283	-0.00988269	0.04527	0.00915689	0.022861	0.0308293	0.067381	0.00196646	0.05208
ase	0.0311362	0.0148922	0.000761786	0.0607743	0.0269723	0.00667186	0.00928725	-0.00272364	0.0235627	0.0174877	0.038764	1.0439e-05	-0.00670426	0.00178551	0.00113369	-0.00256159	0.0460581	-0.00236467	0.0274108	0.0165777	0.0125714	0.016531	0.0809542	0.00459699	-0.00261672	0.000690429	0.0189456	-0.0112131	0.0404518	0.0198658	0.0552601	0.0389767	0.0444271	0.00602467	0.0493472	0.0162067	0.0665863	0.0215241	0.0225515	-0.00722067	-0.00276859	-0.00360943	0.0223502	0.0138099	-0.00275132	0.00860931	0.0165041	-0.00311492	0.0160767
ato	0.000500668	0.00406278	0.028027	0.00650336	0.00469381	-0.000305905	0.0102316	0.0180068	0.00418925	0.000170863	0.0116713	0.00754662	0.182232	-0.00989698	-0.00207493	-0.00239327	0.0178909	0.00269734	0.00170676	0.00522079	-0.0053579	0.0279818	0.00249692	0.0117062	0.0189454	-0.00663607	-0.00228679	0.234231	0.00815266	0.0213134	0.00492559	0.000656001	0.00821603	-0.00273356	0.00696455	-0.00981524	0.00893335	0.00555568	0.00764174	0.0127125	0.174028	0.210579	-0.00490452	0.0149879	0.00636275	-0.000144609	-0.00254467	-0.00291024	-0.00141103
az2	0.0375067	0.0427366	-0.00167839	0.00860261	0.0603636	0.0161958	0.0436598	0.0172547	0.0347589	0.0230155	0.0255632	0.00120774	0.00417287	0.0800359	-0.0034286	0.0185157	0.00906539	0.00461408	0.0704081	0.0151927	-0.00293278	0.00476467	0.0575781	0.0141539	0.0180703	-0.000921156	0.102487	-0.00573443	0.0607739	0.129527	0.0132841	0.00899159	0.0288634	0.0332254	0.0101878	0.0816221	0.00607172	0.0500963	0.0129697	0.0104321	0.000439236	-0.00370288	0.0118611	0.0291985	0.0499623	0.0612728	0.0172547	0.0147155	0.0254856
bab2	0.123814	0.0158987	0.00604912	0.0211323	0.0785049	0.0838879	0.0277084	-0.0010896	0.0475485	0.0132844	0.0335787	0.0111356	0.00702444	0.0517644	0.0167309	0.0242911	0.00521322	0.0378172	0.0916499	0.0115407	0.00904094	0.00946099	0.0124781	0.0144974	0.0237364	0.0113862	0.0785008	-0.00448581	0.0259089	0.0450987	0.00407562	0.00803043	0.0231305	0.154009	0.00640124	0.0392728	-0.0049708	0.0559419	0.0193514	0.00612951	0.000152437	-0.00289661	0.0651745	-0.0006756	0.0168014	0.0328639	0.070345	0.0404034	0.0652114
bap	-0.00303948	0.0069771	0.0336734	0.012094	0.00393484	-0.00397468	0.00952052	0.00709853	0.0200679	0.00695973	-0.00363902	0.021421	0.200633	-0.0178079	0.00137952	0.00787546	-0.00425833	0.0102514	-0.0029017	0.0172645	-0.000983814	0.00510775	-0.00488305	-8.82862e-05	0.0381274	0.0047975	0.0084709	0.45699	-0.00567977	0.0221662	0.00387067	0.00214392	0.0021336	-0.00287622	-0.0092545	-0.0160164	0.00949991	-0.000366189	-0.00840352	0.018819	0.356357	0.39166	-0.00475781	-0.00166016	0.0134194	0.0041407	0.00709853	0.00548763	-0.00214829
bbx	-0.0054342	0.0314277	0.0753327	0.0246077	0.00791625	-0.00280393	0.00469909	0.0160146	0.0229148	0.00620628	0.00931191	0.00346751	0.128752	0.000548975	0.00650803	0.00334405	0.00492488	0.00472325	-0.00478474	0.0114079	0.00431411	0.0550677	0.00118423	0.0247833	0.0308586	0.0144869	0.0112547	0.317383	-0.00227435	0.0418881	0.0168953	-0.00351793	0.00928533	0.00193127	0.00181241	-0.00596762	0.0173793	0.00888165	-0.00779461	0.0146935	0.281248	0.218474	0.0052293	0.00827693	0.0283929	0.00825057	0.00935046	0.00710719	0.00457992
bcd	0.0487526	0.0770778	0.032844	0.0676993	0.0278679	0.0371438	0.024129	-0.00123984	0.0636183	0.0250516	0.0445556	0.0347063	0.00548282	0.0438552	0.0396216	0.0210936	0.0111081	0.139139	0.104776	0.0232851	0.0272896	-0.00173841	0.0725693	0.00618019	0.0206001	0.0276249	-0.00111419	0.00517593	0.0110245	0.0323132	0.0225731	0.011363	0.033809	0.0181604	0.0194466	0.0687705	-0.00100565	0.0528098	0.0210979	0.012572	0.00848293	-0.00329602	0.0521516	0.0667369	0.0397674	0.0077541	-0.00123984	0.0352035	0.0430431
bigmax	0.00784113	0.0109032	0.0249465	0.0145375	-0.00370288	0.0224857	-0.00148933	0.0127465	0.039903	0.00232193	-0.00243301	0.0210647	0.0133707	-0.00173055	0.00744497	0.0137714	0.0254107	0.0204262	-0.0045315	0.0120582	0.0100707	0.0273702	0.00420478	0.0273435	-0.00171986	0.0140062	-0.00160872	0.0104743	0.000266916	0.0248514	-0.00108701	-0.00700208	0.00245396	-0.00192301	-0.00897721	-0.00681639	0.00474898	0.0123945	0.00725828	0.028287	0.0722854	0.0226935	0.0209486	-0.00110997	0.0134414	0.0034877	0.0127465	-0.00204731	0.017655
bin	0.00190308	0.00761163	0.0172435	0.0203308	0.00204271	0.0037405	-0.00168524	0.0108382	0.00773219	0.000833319	0.00671718	-0.00660908	0.115621	0.00321341	0.000257731	-0.0019051	0.0122093	0.000664637	0.00507293	0.0116644	-0.00426501	0.0193915	-0.00188197	0.00229111	-0.0019461	0.00993641	-0.00182034	0.279052	0.00501578	0.00349274	0.00578007	0.00535841	0.000261401	-0.00217597	-0.0065879	-0.00397091	0.0164752	-0.00586579	-0.00178381	0.00437373	0.194626	0.281276	0.00338033	-0.00125597	0.00555092	0.00850401	-0.00202561	-0.00231662	0.0018771
bowl	0.0215892	0.00107854	0.0348151	0.0199443	-0.00302099	0.00993898	-0.00121507	-0.00146048	0.0286287	0.0340761	-0.00198497	0.011698	0.00365674	0.00541297	0.00365674	0.0175399	0.00827046	0.00409032	0.0104094	0.00983766	0.00539337	0.011272	0.0191532	0.0176516	-0.00140315	0.0114269	-0.00131247	0.00708963	-0.00580711	0.00381798	0.000990477	0.0080628	0.022805	-0.00156889	0.00864724	0.00567657	0.00519161	0.0142347	0.00296267	-0.0038719	0.0219849	-0.00388257	0.0246604	-0.000905565	0.00369136	0.0319715	0.0163291	0.0138879	0.00110992
bs	0.00813145	0.014987	0.0540877	-0.000637669	-0.000381454	-0.000473534	-0.00213731	0.00761133	0.0331386	0.0252164	-0.00349157	0.0701284	0.084974	0.0148332	0.010276	0.0192308	-0.000240021	0.0111939	0.00560581	0.00262902	0.0139757	0.0190495	-0.00441992	0.0247366	0.0187233	0.0491209	-0.00230865	0.191869	-0.00245716	-0.00194542	-0.00171846	-0.00742084	0.000789397	0.00671818	-1.88568e-05	-0.0033272	0.0108929	0.00529464	-0.00278335	0.00475611	0.160355	0.196961	0.0159494	-0.00159289	0.0228385	0.0147599	-0.00256899	0.0059653	0.0147534
bsh	0.183619	0.0354372	0.00697534	0.0328352	0.0462441	0.117872	0.0162873	0.00375504	0.0425322	0.057767	0.0284465	0.00678322	0.00142913	0.281861	0.015177	0.0128788	-0.00704453	0.0188447	0.0880202	0.0269659	0.0216968	0.00756345	0.0667077	0.0603925	0.0162083	0.018741	0.0307958	-0.000463431	0.0378112	0.39437	0.00111974	-0.000267264	0.0114268	0.058243	-0.00182232	0.256549	-0.00835218	0.0793275	0.0500869	-0.00423706	-0.000853704	-0.00433428	0.0707891	0.013481	0.0214727	0.0859565	0.0637116	0.0143783	0.0976958
btn	0.0366203	0.0146807	-0.0020503	-0.00103025	0.0711368	0.0197825	-0.000290618	-0.000349315	0.0147623	-0.00245936	-0.000474762	-0.00113973	-0.000859843	0.00877479	-0.000859843	-0.000328532	-0.00100225	-0.0008262	0.0285174	0.0154371	-0.000735497	-0.00171201	-0.00105978	0.0180643	-0.000335603	-0.00194484	-0.000313915	-0.00143811	-0.00138893	0.00489434	-0.00111014	0.0177748	-0.00151139	-0.000375244	-0.00284318	0.00188131	-0.00159359	-0.00152565	-0.00141457	-0.000926075	-0.0028665	-0.000928627	0.00958379	-0.000216591	-0.000857089	-0.000712697	0.22212	-0.000399499	0.0226525
cad	-0.00384226	0.0607058	0.00705936	-0.00707136	0.00811406	0.00273755	0.00345743	0.00150257	-0.00733898	0.0062008	-0.00607129	0.00568162	-0.00126192	0.0103615	-0.00126192	0.0148391	-0.00654461	-0.00297026	0.00526009	-0.00881447	0.00196144	0.0510839	-0.00563842	0.0280912	-0.00429172	-0.00955678	-0.00401438	0.00212746	-0.00108227	0.0388267	-0.000967185	-0.00514589	-0.00257385	0.000759068	-0.0164522	-0.00106552	-0.015075	-0.00982599	-0.00468491	-0.000538289	0.0165391	0.00165301	-0.00494454	0.00685398	0.00124553	-0.00324974	0.00150257	0.000112019	0.00508732
cas	-0.00451065	-0.00528003	0.00908371	0.0352648	0.00861918	0.00236053	-0.000952109	-0.00114441	0.0297756	0.00192057	0.0151378	0.00326088	0.00642629	-0.000217756	-0.00281698	-0.00107632	0.0443654	-0.00270676	-0.00289693	0.0157102	-0.0024096	0.0131843	0.0115585	0.0015227	-0.00109949	0.00609319	-0.00102844	-0.00471147	0.035767	-0.00338383	0.0466136	0.0189351	0.0374741	-0.00122936	0.040125	0.000861748	0.0149258	-0.00499826	0.0179954	-0.00303396	-0.00361792	0.00552207	0.0143412	-0.000709587	0.00646477	-0.0023349	-0.00114441	0.0185221	0.00366739
cato	0.0192458	-0.00149208	-0.00189818	-0.000953818	-0.000668948	-0.00114962	-0.000269056	0.0797738	0.0161924	0.00947156	-0.000439538	-0.00105517	-0.000796049	0.0101498	-0.000796049	-0.000304158	-0.000927889	-0.000764903	-0.000818644	0.0169121	-0.00068093	-0.00158499	0.0255656	-0.00124701	-0.000310704	-0.00180055	-0.000290625	-0.00133142	0.0190592	0.0235849	-0.00102778	-0.00126497	-0.00139926	-0.000347404	-0.00263224	0.0234264	-0.00147536	-0.00141246	-0.00130962	0.0294779	-0.00265383	-0.000859731	0.0106985	-0.000200522	-0.0007935	-0.00065982	-0.000323399	-0.000369859	-0.00101581
caup	0.12304	0.0311278	0.0401093	0.0339746	0.0357373	0.09797	-0.00229302	-0.00275616	0.146738	0.0475006	0.0452257	0.146374	0.0087107	0.0320963	0.159787	0.0277177	0.00873304	0.0942369	0.124893	-0.00130539	0.00776796	0.00421287	0.0420312	0.0142473	-0.00264796	0.150077	0.0398159	-0.00434788	0.00352382	0.0137509	0.00327479	-0.00587491	0.0303027	0.032428	0.0165685	0.0724961	0.00220193	0.0870646	0.0315162	-0.00370784	-0.00568087	-0.00732702	0.214251	0.0595703	0.0126679	0.083061	0.0447584	0.0799571	0.122211
cbt	0.0455535	0.00444204	0.0227176	0.0527495	0.0152492	0.0575353	-0.00285266	0.00425649	0.0656693	0.0446222	0.023629	0.0433399	0.0197554	0.0300473	0.0322867	0.0212877	0.011695	0.0179652	0.0309323	0.00419882	0.0110729	0.0134505	0.0379933	0.0209778	-0.00329422	0.0935683	0.0140204	-0.00468232	0.0156481	0.0167189	0.0280321	0.00444168	0.0211128	0.0106267	0.0203903	0.0226279	0.0236203	0.0509232	0.0359692	-0.00617953	0.00708357	-0.00911525	0.0637661	0.0102636	-0.00212742	0.0383023	0.0273124	0.00279989	0.0261498
cg	0.0213801	0.0240124	0.14729	0.0124161	0.00338984	0.0192702	0.0022259	0.00464251	0.025853	0.0400429	-0.0028802	0.0298153	-0.0104533	0.0763762	0.0148046	0.015587	-0.0114408	0.026141	0.0258799	-0.0183504	0.0152312	0.108178	0.00746513	0.0397941	0.00871235	0.094011	0.00404577	0.012705	0.00176958	0.0730596	-0.0143828	-0.0159367	0.000420002	0.000127121	-0.0213638	0.0523086	-0.0244958	0.0214861	0.0208954	-0.00892397	0.0695323	0.00878418	0.0695608	-0.00151217	0.0294898	0.0199511	0.0105436	0.0142418	0.0334451
chinmo	0.00761288	0.0302729	0.178655	0.0253374	0.000451946	0.0174355	0.00219106	0.0222729	0.0763518	0.122245	0.00357937	0.0914401	0.0290988	0.0755253	0.0591203	0.018659	-0.00740392	0.0422524	0.0128959	-0.0171388	0.023542	0.0626538	0.00245727	0.0372727	0.00866242	0.184339	0.000727864	0.0725583	-0.0126002	0.00096529	-0.00142295	-0.0160589	0.0229927	0.00831432	-0.00236753	0.0256026	-0.0213572	0.0431342	0.0177699	-0.0157039	0.0994899	0.0643033	0.104463	-0.00628227	0.0305556	0.0183958	0.0134352	0.0141762	0.0285568
chn	0.00165535	0.0103683	0.0507512	0.0127369	0.0431982	0.00272393	-0.000919765	-0.00110553	0.00528257	-0.00434108	0.0157755	-0.00360709	-0.00272128	0.0236153	-0.00272128	-0.00103976	0.00504771	-0.00261481	0.00650668	0.0219842	0.00884457	0.0577989	0.0199816	0.0141673	0.0966467	-0.00185467	0.0251193	0.0184962	0.0373339	0.0467545	-0.00351343	0.00779153	0.00070564	0.0206625	0.0150825	0.0201059	0.0053827	0.0114885	0.00137869	0.00595772	0.0327558	0.00592544	0.00411742	-0.000685481	0.006885	0.0323274	-0.00110553	-0.00126436	0.0341097
ci	0.154504	0.037128	0.0905414	0.0437778	0.0655114	0.105786	0.0203722	0.0192561	0.0989644	0.0953973	0.0416824	0.0160113	0.0155939	0.139677	0.0173385	0.0394609	0.010052	0.0301863	0.0770683	0.031387	0.00685059	0.0589729	0.105338	0.0839017	0.00273854	0.0842265	0.0370842	0.0250439	0.0255564	0.126295	0.00668773	0.0135429	0.0422776	0.0448984	0.0404908	0.104792	-0.000780191	0.0810499	0.0508733	-0.0105428	0.0578958	0.0120229	0.144399	0.0167162	0.0349962	0.102512	0.0577736	0.0188554	0.0771429
crc	0.0654611	-0.00182749	0.0204621	0.0211216	0.0308685	0.0356763	-0.000329538	-0.000396097	0.0414836	-0.00278872	-0.000538343	0.0188827	-0.000974995	0.0182216	0.0256852	-0.00037253	-0.00113647	0.0268003	0.0767887	-0.0017513	-0.000833997	-0.00194129	-0.00120171	-0.00152732	-0.000380548	0.0097787	-0.000355956	-0.00163071	-0.00157494	0.0107357	0.0194465	-0.00154932	-0.0017138	0.121352	-0.00322394	0.0117912	-0.00180701	0.0134267	0.0147136	-0.0010501	-0.00325039	-0.00105299	0.0496282	-0.000245598	-0.000971872	-0.000808143	0.0650056	-0.000453001	0.0406475
croc	0.019219	0.0232343	-0.00461103	0.0221404	0.0157756	-0.00481538	-0.00112699	-0.00135461	-0.00198959	0.015771	0.0122728	-0.00441977	-0.00333439	0.0204494	-0.00333439	-0.00127402	0.0162566	-0.00320393	0.00417208	0.00279113	0.00627411	0.0013056	0.0213064	-0.000204957	0.0186524	-0.00754192	-0.00121733	-0.00557686	0.0238318	0.0487753	0.00783385	0.242127	0.00759029	-0.00145516	-0.00856673	0.0172043	-0.00192139	0.0118554	-0.000702319	-0.00359123	-0.011116	-0.00360113	-0.00260253	-0.000839921	0.00451623	0.0254859	-0.00135461	-0.00154922	0.00802497
crol	0.023432	0.0341934	0.168111	0.0271115	0.00531175	0.00630737	0.00435872	0.0139276	0.0260967	0.0430985	0.00472187	0.0182664	-0.00591966	0.0698478	0.0179873	0.0055047	-0.00493764	0.00248843	0.0124008	-0.0161314	0.0107726	0.0995998	0.0032962	0.0416654	-0.0017489	0.0998165	-0.00797989	0.00183794	0.00441733	0.0746574	0.00478772	-0.0120261	-0.000319505	-0.00347216	0.0167336	0.0656261	-0.0130087	0.0148277	0.0258225	-0.0210733	0.0536379	0.0034674	0.0748852	-0.00550587	0.0248463	0.00588806	0.000894809	0.00694156	0.0263693
crp	0.000478273	0.0112384	0.0442293	0.0163956	0.00971537	-0.00405129	-0.00261343	-0.00314127	0.0206544	-0.00248327	0.00188937	0.0155571	-0.000911921	-0.0154697	-0.000911921	0.0237282	-0.000223172	0.0174057	-0.00131808	0.00718402	0.00931536	0.0123382	0.00987833	0.0251142	0.0579314	0.00857004	0.00648494	0.266387	0.00238429	0.0368489	-0.0020377	-0.00796835	0.00206091	0.00441399	-0.00518177	-0.00233311	0.019117	0.00566759	-0.00228463	0.0170188	0.226619	0.162274	0.0158182	-0.00194773	0.0196608	0.001809	0.00522441	-0.00359255	0.00352924
cwo	0.0493729	0.039429	0.0799779	0.0531748	0.0209996	0.0621706	-0.00520702	0.0112567	0.11912	0.0304398	0.0301777	0.122762	0.00601399	0.0529901	0.100618	0.00342466	0.0127146	0.0947653	0.0692271	-0.0136338	0.0285118	0.00833936	0.0593815	0.0194228	-0.00145548	0.217097	0.0138636	-0.0107163	-0.0093141	0.0291515	0.0119941	-0.00865716	0.0200295	0.0177369	0.0119591	0.123697	-0.00326388	0.0913947	0.0249109	-0.0149341	0.00605646	-0.00506106	0.165824	0.0384747	0.0419451	0.0345478	0.0156355	0.0234789	0.0574725
da	0.0107247	0.00189494	0.0141143	-0.00272728	0.0252623	0.00466361	-0.000769321	-0.000924705	0.00813208	0.01817	-0.00125678	-0.00301709	-0.00227617	0.000883376	0.0205873	0.0289459	0.00716859	0.0097064	0.0310157	-0.00408848	-0.001947	0.0419531	-0.00280544	0.00377516	-0.000888405	-0.00514837	0.0303713	0.00307796	0.0176931	0.025409	0.00593954	-0.00361696	0.00255786	0.0512241	0.00326388	0.00498019	-0.00421855	0.00246038	0.00325226	0.00816955	0.017402	-0.00245825	0.0208954	-0.000573359	-0.00226888	0.0118878	0.0551629	-0.00105755	0.00607688
dan	-0.00858007	0.000485623	-0.0106899	0.0793302	0.00130218	-0.00773838	-0.00181108	-0.00217688	-0.00735256	-0.00829685	0.0235027	-0.00710262	-0.0053584	-0.017598	-0.0053584	-0.00204736	0.0147349	-0.00514875	-0.00551049	0.0287863	-0.0045835	-0.000739022	0.0211923	-0.0083939	0.0353189	-0.0121199	0.0113743	-0.00602063	0.0704699	-0.00883075	0.0613573	0.0842621	0.0410196	-0.00233846	0.069871	-0.02086	0.123134	-0.00673099	0.00613109	-0.00577115	-0.0132879	-0.00578706	-0.0101906	-0.00134976	-0.00534124	0.00144346	-0.00217688	-0.00248961	-0.00683769
danr	0.00500949	0.0114005	0.00268965	0.043479	0.0069072	0.00659954	-0.00108868	-0.00130856	0.00712854	0.00824979	0.0274373	0.0018515	0.0129561	-0.00226336	0.00486756	-0.00123071	0.0101444	0.00532032	0.00455473	0.00330209	-0.00275523	0.00180939	0.0091829	-0.00504573	-0.00125719	0.00362215	-0.00117595	0.00435566	0.0250377	0.00732078	0.0460964	0.0717074	0.0221826	-0.00140569	0.0402476	0.000210489	0.0645499	0.0126786	0.0145037	-0.00346914	0.0069438	-0.0034787	0.0169048	-0.000811367	0.00490365	-0.00266981	-0.00130856	0.0158571	0.00859947
dati	0.00824092	0.00132124	-0.00212808	0.00809301	0.0145565	0.0154067	-0.00119492	-0.00143627	0.00937213	0.0111124	0.0379958	0.00089348	0.0185843	0.00771212	0.00383785	-0.00135081	0.065562	0.0196161	-0.00363572	0.0185018	0.0141966	0.0154473	0.0196219	-0.00553815	-0.00137988	-0.00136787	0.0188341	-0.00147239	0.0126666	0.0163948	0.0756038	0.00838833	0.027628	-0.00154288	0.0207876	0.0079579	0.00550071	0.00630234	0.0618766	-0.0038077	0.0112398	0.0098452	0.00807038	0.0282689	0.0112694	0.00595385	0.0166514	-0.0016426	0.00707428
dimm	0.00294545	-0.00692954	-0.00580144	0.0781239	-0.00310673	-0.00533908	-0.00124955	-0.00150193	0.000739747	-0.00296104	0.0489083	-0.00490044	-0.00369702	-0.00187883	-0.00369702	-0.00141257	0.116882	-0.00355237	0.00305786	0.0052455	-0.00316238	0.0177333	0.0470525	-0.00579136	-0.00144297	-0.00519181	-0.00134973	-0.00193568	0.0379755	-0.00666897	0.0938219	0.0209206	0.021827	-0.00161342	0.018842	-0.00447292	0.0431085	0.00546916	0.0284521	-0.00398179	-0.00571731	0.0025421	0.00137382	-0.000931266	-0.00368518	-0.00306434	-0.00150193	-0.0017177	-0.00471765
disco-r	0.0213152	-0.00136206	0.0288376	-0.000870701	-0.000610655	0.0238262	-0.000245611	-0.000295218	0.0567378	0.0107911	-0.000401236	0.026103	-0.000726681	0.0118547	0.0708065	-0.000277653	-0.000847032	-0.000698249	-0.000747306	-0.00130527	0.0411462	0.016733	-0.000895653	-0.00113834	-0.000283629	0.0305111	-0.0002653	-0.00121539	-0.00117383	-0.00282096	-0.000938214	-0.00115474	-0.00127733	-0.000317131	0.0088504	0.00374942	-0.0013468	0.039378	-0.0011955	-0.000782656	0.0199165	-0.000784813	0.0120996	-0.000183048	0.0351562	0.0424939	-0.000295218	0.0763976	0.027173
dmrt11E	0.0996259	0.0857855	-0.0109104	0.0162217	0.0366619	0.0706053	0.0204403	0.0102443	0.00900564	0.0464082	0.0194718	-0.00114376	-0.00865979	0.207848	-0.00655769	0.0115327	-0.00235212	0.00513549	0.0787765	0.0819926	0.00863484	0.0128522	0.0405459	0.0743379	0.0271825	-0.00925334	0.0297291	-0.00252507	0.0892481	0.397156	0.00298221	0.0021864	0.00874573	0.0423957	-0.004176	0.153795	-0.00207823	0.0405138	0.0303014	0.0701257	0.0050368	0.00168866	0.0239541	0.0133863	0.0314622	0.0577255	0.0669691	0.012063	0.105798
dmrt99B	0.148817	0.0766872	0.0195996	0.0730208	0.0626291	0.116687	0.0152125	0.00663976	0.0893319	0.0806738	0.0558924	0.0224358	0.00433134	0.26921	0.0441085	0.00801813	0.00921678	0.0765424	0.0905472	0.00930344	0.0248322	0.00137899	0.109243	0.0266213	0.00377497	0.0458821	0.0412288	-0.0197582	0.0212459	0.255499	0.00948378	0.00487444	0.0228117	0.0353442	0.0179595	0.44241	-0.000337586	0.117457	0.053107	-0.0138786	-0.0241159	-0.00985928	0.15555	0.0301112	0.0222032	0.0674838	0.021096	0.0131857	0.103925
dpn	0.0727236	0.0625916	0.00547763	0.0842685	0.148652	0.0177164	0.0286257	0.0231853	0.127049	0.0262044	0.0715485	0.0205257	0.0103575	0.0625568	0.0206502	0.0249033	0.0206062	0.0272427	0.0898787	0.0313469	0.0136829	0.0055772	0.169476	0.0151725	0.0242966	0.0162661	0.0262382	0.000799235	0.0174457	0.0895904	0.0414014	0.0114772	0.0501211	0.0447972	0.0301539	0.101693	0.0102117	0.099237	0.0325885	0.018434	0.00073788	0.00404864	0.0511721	0.0190727	0.0517251	0.0515971	0.0231853	0.0307628	0.0501215
drm	-0.00278557	0.0112823	0.0528059	0.0121277	-0.00192976	-0.0056484	-0.00248698	0.0233478	0.0192106	-0.00559387	0.00240024	0.01462	0.0713726	-0.00929452	-0.00377948	0.00652224	-0.00550212	0.00782267	-0.00408628	0.0229698	0.00624333	0.0144535	0.00256949	0.0183476	0.0519517	-0.0102085	0.00708143	0.474792	-0.00519611	0.0308848	-0.00394142	-0.00489445	-0.000614525	0.00496209	-0.00969318	-0.00982866	0.015613	0.00118579	-0.00553421	0.0120244	0.38227	0.356795	-0.00103375	-0.00185349	0.0357463	0.0068372	0.00578975	-0.00341873	-0.00657789
dve	0.0320445	0.0142089	0.0623537	0.00462122	0.000735243	0.0362218	-0.00402363	0.0117873	0.0364918	0.0488523	-0.00249374	0.0457567	0.07393	0.0412433	0.0377891	0.0307991	-0.00223211	0.0120617	0.0119242	-0.00488731	0.0241084	0.0348517	-0.00181704	0.0524245	0.0184228	0.110146	-0.00434619	0.239925	-0.00656248	0.0355997	-0.00484436	-0.00604457	0.00240191	-3.64512e-05	-0.0208862	-0.00702486	0.00132219	0.0148336	0.00530052	-0.000229867	0.253055	0.198527	0.052861	-0.00299873	0.0198576	0.0227931	0.0062461	0.0138535	0.0344991
dysf	0.0359503	0.065495	0.0231525	0.135554	0.0848984	0.0302898	0.0149711	0.00558396	0.135267	0.0229304	0.0831936	0.0114035	-0.00810392	0.0721286	0.0179146	0.000901738	0.0246191	0.0782782	0.056799	0.0105411	0.0324029	0.0071907	0.16448	-0.0013879	-0.00485555	0.0283902	0.0368843	-0.00905432	0.0312443	0.0733426	0.0395073	0.0365212	0.0739197	0.00447478	0.0618744	0.169844	0.0336536	0.141869	0.0538499	-0.00534079	-0.0130343	-0.0114266	0.0913749	0.0140159	0.0441526	0.0341018	0.0162219	0.0174789	0.0267121
emc	0.0162998	-0.00172295	-0.00219189	0.0225402	0.0328371	-0.0013275	-0.000310688	-0.000373439	-0.00171493	-0.0026292	-0.000507548	-0.00121844	-0.000919222	-0.0046566	-0.000919222	-0.00035122	-0.00107146	-0.000883257	-0.000945313	-0.00165112	-0.00078629	-0.00183024	-0.00113297	-0.00143996	-0.000358779	-0.00207915	-0.000335594	-0.00153743	0.016135	0.00413224	-0.0011868	-0.0014607	0.0146078	-0.000401158	0.0058573	0.0011576	0.0137045	-0.00163101	-0.00151226	-0.000990028	0.0057662	-0.000992757	0.0197329	-0.000231549	-0.000916278	-0.000761915	-0.000373439	-0.000427088	-0.00117299
ems	0.0209056	0.0238154	0.000633885	0.0189909	0.013522	-0.00293222	0.112625	-0.000824862	0.00314867	0.00802283	0.0220175	0.00700421	0.0107817	0.020323	-0.0020304	-0.000775785	0.00864105	-0.00195096	0.0352963	0.00355035	-0.00173678	-0.00404269	0.0183314	-0.00318061	-0.000792481	-0.00459248	0.0342287	-0.00339591	0.0126871	0.058411	0.00732891	-0.00322643	0.0331851	-0.000886089	0.00537948	0.0245548	0.0101996	0.0255327	0.0201851	-0.0021868	0.0332422	-0.00219283	0.0197651	-0.000511451	0.036535	-0.00168294	-0.000824862	-0.000943363	0.00747502
en	0.0103667	0.0137656	0.00882917	0.0159549	0.038005	0.0356139	0.065284	-0.000943412	0.0320688	0.0296462	-0.00128221	0.0223613	0.00888341	0.0320426	0.0537059	0.0283386	-0.00270682	0.00942692	0.0303086	0.0147135	-0.00198639	0.0181592	0.0153593	0.0251446	-0.000906377	0.00985855	-0.000847805	0.00286477	0.00323123	0.0367593	0.00570449	0.0105007	0.0216345	0.0245789	0.0028982	0.00677234	-0.00430389	0.00225014	0.00303811	0.0183209	0.00975536	-0.00250799	0.0290164	-0.000584958	-0.00231478	0.0250792	0.081524	-0.00107894	0.067467
erm	-0.00511068	-0.00152859	0.00709878	0.0107015	0.00165822	-0.000443803	-0.00174926	-0.00210257	-0.0014463	-0.00752868	-0.00285765	0.00461414	0.0858006	-0.0108502	-0.00517549	-0.00197748	-0.00603265	-0.004973	-0.000406508	0.033293	0.00147522	0.00510931	-0.00226958	0.00487471	0.0366943	-0.0071624	-0.00188949	0.438809	0.0042373	0.0143191	-0.00275676	-0.00822416	-0.00329766	-0.00225864	-0.00916235	-0.00790102	0.00968633	-0.00918306	-0.005421	0.0272965	0.314207	0.429931	-0.00364385	-0.00130369	0.00498176	-0.0042898	-0.00210257	-0.00240463	-0.00263339
esg	0.0394637	0.0458766	-0.00242376	0.13786	0.0852811	0.00417779	0.0458548	-0.00197715	0.0839707	0.0170004	0.104008	-0.00238661	-0.00486676	0.0464998	-0.00486676	-0.00185951	0.0404712	0.0400257	0.0263378	0.0214295	0.0146529	0.00668948	0.155571	-0.00417495	-0.00189953	0.0107201	0.0275418	-0.00167052	0.0523778	0.0791029	0.0395992	0.0398777	0.0284226	-0.00212391	0.0312223	0.0970663	0.0612174	0.0829655	0.0478767	-0.000251711	-0.00616107	-0.000279748	0.0209084	0.0200144	0.0274763	0.0153804	-0.00197715	-0.00226119	0.00644851
eve	0.0512104	0.0342351	0.00603018	0.0100055	0.00471332	0.0670879	0.0064588	0.0101649	0.0482395	0.0625835	0.00789925	0.0366276	0.00564855	0.10212	0.029144	0.00793975	-0.00737447	0.033385	0.0315541	0.0148013	0.00577104	0.00856533	0.0120115	0.0517801	0.0149573	0.0500438	0.00898062	0.00218625	-0.00192006	0.0705834	-0.0158142	-0.0158158	-0.00530621	0.018401	-0.0241346	0.0799865	-0.020595	0.0400287	0.0149603	0.0405915	0.011733	0.0022699	0.0609951	0.0183643	0.0102094	0.028225	0.0173696	0.0351328	0.0457286
ewg	0.0108371	0.0172281	0.188206	0.0058794	0.0169729	0.0134098	0.00448907	-0.00405507	0.0131464	-0.00359778	0.00412227	-0.00313901	-0.0019802	-0.00827878	0.0113554	0.0170549	-0.000177214	0.00428327	0.0104881	0.00154878	0.000805806	0.133317	0.0245622	0.0220426	0.0233436	0.0109922	0.0181952	0.0411328	0.0121291	0.00991607	0.00161252	-0.000661817	0.00540826	0.00782673	0.0114701	0.0277171	-0.00541956	0.0186803	-0.0066266	0.00163948	0.0641752	0.00898982	0.0668102	-0.00251433	0.0596166	0.0142225	-0.00405507	0.0239732	0.0103127
exex	0.0587563	0.00281578	0.0557262	0.0162289	0.00501638	0.0854395	-0.00680306	0.00575011	0.110757	0.0139272	0.00682921	0.131207	0.0323867	0.0179463	0.117546	0.0145201	-0.00395075	0.0618752	0.0469435	-0.0233971	0.037479	0.00825912	0.012119	0.0131282	-0.00785611	0.192445	0.00814734	0.00907546	-0.0165943	-0.0062438	-0.00283905	-0.0220987	0.00696424	0.0171483	-0.0111823	0.0333707	-0.0156496	0.0570794	0.0250897	-0.0203598	0.00691913	0.00193315	0.182917	0.0342214	0.0269232	0.0568541	0.00575011	0.0332791	0.085825
eyg	0.0681643	0.0117981	0.00770309	-0.00220349	0.0152646	0.066199	-0.000621568	-0.00074711	0.0731408	0.0150957	0.0245266	0.0403728	0.0123039	0.0214002	0.0123039	-0.000702659	-0.00214359	0.0276614	0.0393762	0.00464172	-0.00157307	-0.00366162	-0.00226664	-0.00288081	-0.000717781	0.0276272	0.0379309	-0.00307581	-0.00297063	0.00826705	0.0195935	-0.0029223	0.0292248	0.0314982	0.00726845	0.00231592	0.00429814	0.036939	0.00563086	-0.00198067	0.00711928	-0.00198613	0.0560861	-0.000463242	-0.00183313	0.0495994	-0.00074711	0.0294884	0.0754338
fd102C	0.0650865	0.00390421	0.00639952	-0.000624401	0.0235532	0.0494939	0.0154354	0.0122771	0.0040002	0.0180889	-0.00250542	-0.00165873	0.00121849	0.0320193	-0.00453758	0.0132789	-0.000343672	0.00162855	0.096107	0.0112509	-0.00388139	0.0172972	-0.00559269	0.0372464	0.057016	-0.0102634	0.0140543	-0.00758924	0.0859244	0.114059	0.00755267	0.00372382	0.00193147	0.0506046	-0.00413787	0.00662656	-0.00840975	0.0148556	-0.000418898	0.00580866	-0.00434176	-0.00490057	0.0264354	-0.001143	0.0185746	0.0170459	0.111121	0.0102411	0.0982228
fd19B	-0.00315005	0.00464936	0.0722133	0.0251717	-0.000864553	0.00144289	-0.00224135	0.0167402	0.0240861	0.00811292	0.0106458	0.0241828	0.0369405	-0.0155275	0.0250572	0.0181283	0.00928638	0.0101124	0.00473832	0.00811526	0.0128304	0.0190104	0.0014883	0.012504	0.017639	0.0580028	0.00839051	0.260869	0.0115019	0.00553964	0.00374346	-0.00301322	0.00425191	0.00615262	0.00299788	-0.00964537	0.00713515	0.0130047	-0.00121205	0.0149388	0.201791	0.202037	0.0183177	-0.00167043	0.017232	-0.000723761	0.0070231	0.0139155	0.0133222
fd3F	0.0942813	0.0120838	0.0295725	0.0259607	0.0185012	0.0971169	0.016802	-0.00171487	0.159513	0.0146255	0.0423377	0.0786313	-0.00422116	0.0323339	0.14418	0.0306414	0.00570482	0.079575	0.12797	-0.000634898	0.0324937	0.00731014	0.0350166	0.00529937	-0.00164755	0.0599394	0.0322133	0.000388046	-0.00296563	-0.00459908	0.013759	-0.00279233	0.0351519	0.0405242	0.00744249	0.0432089	-0.00445398	0.115547	0.0309016	0.00694346	0.0013758	0.0011704	0.124501	0.0233906	0.0578232	0.0859077	0.0134539	0.143966	0.111206
fd96Cb	0.0876825	0.0907086	-0.00899946	0.0503101	0.0614226	0.0780626	0.0360274	0.0186544	0.0329379	0.0383652	0.0744099	-0.00481295	-0.0017832	0.193617	-0.00608955	-0.00232672	0.000301643	0.0389518	0.0775071	0.0326066	0.0048489	-0.00336923	0.0870294	0.00152188	0.0196137	-0.000223499	0.103562	-0.00499782	0.0652972	0.258991	0.0122046	0.00941093	-0.00329179	-0.00265754	0.00696233	0.191035	0.0027931	0.0944681	0.0268822	-0.00655861	-0.012232	-0.00657669	0.0346428	0.0665887	0.0457709	0.0675964	-0.00247391	0.00640972	0.0531291
ftz-f1	0.00776025	0.0260965	0.114106	0.0177508	0.0151741	0.0129851	0.00142932	0.0342477	0.0888701	0.0358717	-0.000100411	0.0893699	0.00883631	0.0361642	0.0533372	0.0107017	0.00348104	0.0334092	0.0117813	0.000904359	0.021596	0.0349807	0.0130698	0.0218505	0.015423	0.213338	0.000623736	0.0579683	-0.0103246	0.0222923	-0.00789318	-0.00978841	0.0228427	0.0172447	0.0141955	0.00962615	0.00489844	0.0474967	0.0237397	-0.00505078	0.0917258	0.0304937	0.0789326	-0.00337897	0.0272131	0.0205662	0.00943693	0.00244702	0.0162559
gce	0.0678389	0.00727571	0.0268613	0.0286701	0.0232343	0.0670978	-0.00188396	0.00925984	0.0404694	0.0432194	0.0223746	0.0174966	0.00382148	0.0217568	0.00851923	0.0223751	0.0217558	0.00441909	0.0216827	0.0242952	0.00620401	0.0271069	0.0542422	0.0274677	-0.00217558	0.0275143	0.0364318	0.007653	0.0202685	0.00906568	0.0402331	0.0179142	0.0225456	0.00829655	0.012608	0.0114867	0.0127076	0.0301707	0.048336	-0.00600339	0.0268965	0.00703824	0.0663311	0.0171745	0.00386927	0.046324	0.0323085	0.0175677	0.0408679
gcm	0.0753893	0.0315197	0.0297456	0.00470462	0.0205402	0.0635409	0.0136483	0.00970364	0.0241264	0.0550492	-0.00730413	0.0196749	-0.00298472	0.107856	0.0195517	0.010976	0.000422596	0.00434122	0.0421911	0.00155899	0.00782466	0.0465567	0.0120133	0.0516351	0.00529885	0.040991	0.0175384	0.0037867	0.0207597	0.136672	-0.00912359	0.00492476	0.00966012	0.0223017	-0.00828865	0.0544871	-0.0111207	0.0242827	0.0221258	-0.000923188	0.0448328	0.0160859	0.0520131	-0.00333222	0.0114773	0.0655623	0.0197555	0.0290178	0.0555527
gcm2	0.0681643	0.0270431	0.00165898	0.00962099	0.0320746	0.0366898	0.0410721	-0.00074711	0.00422624	0.0100068	-0.00101541	0.0189676	0.0123039	0.0121853	0.0123039	-0.000702659	-0.00214359	0.0276614	0.0256204	0.00464172	-0.00157307	0.0035271	-0.00226664	0.0152827	0.0353928	0.0276272	0.0379309	0.0139597	0.00584204	0.0121186	-0.00237434	0.0239437	0.00488179	-0.000802566	0.00281865	0.00530457	-0.00340835	-0.00326303	-0.00302547	0.0111593	0.011536	0.0111181	0.0339422	-0.000463242	-0.00183313	-0.0015243	-0.00074711	0.0598313	0.00876479
gem	0.118623	0.079211	0.00757793	0.0594467	0.0315541	0.101261	0.0184059	0.017709	0.0856606	0.0443452	0.0460854	0.0334707	-0.00196954	0.239801	0.0292643	-0.000983138	0.00119237	0.0722515	0.0866315	0.0418567	0.0383262	-0.00701503	0.0861395	0.0361145	0.00747134	0.041997	0.0314587	-0.0230237	0.0311013	0.311686	0.00472459	1.95461e-05	0.00826065	0.038737	0.0048794	0.443175	-0.0121137	0.115843	0.0622914	0.0523224	-0.0301123	-0.0155013	0.102024	0.025409	0.0341673	0.0576825	0.0233847	0.0275078	0.0837295
gfzf	-0.00550602	0.0981282	0.00575855	0.01715	0.0195155	-0.00752729	-0.00373362	0.0133436	0.0069389	-0.00980038	-0.00172359	0.0275288	-0.00620072	-0.0196505	-0.0013549	0.033695	-0.00454934	0.019635	-0.00429031	0.118991	-0.00379017	0.00509944	0.00411443	0.0418178	0.0575516	-0.00320334	0.0158067	0.229594	-0.00576587	0.0719274	0.00079161	-0.00374585	-0.00134564	0.0117801	-0.00755857	-0.00311293	0.0164937	0.00657132	-0.00779251	0.161436	0.283994	0.138482	-0.0118194	0.00679948	0.0424627	-0.000397827	0.00739983	0.00526401	-0.000771098
grau	0.0806583	0.0683256	0.0337322	0.062841	0.0589854	0.0567977	0.0345511	0.00171344	0.0974252	0.0316211	0.0247456	0.0568077	-0.00440576	0.172728	0.0448522	0.00706388	0.0101922	0.0850702	0.0906255	0.00221769	0.0237483	0.0107221	0.0973012	0.0268269	0.0239976	0.0700335	0.0311395	0.00650331	0.0297719	0.251284	0.00666307	0.00529563	0.0181333	0.0161642	0.0145217	0.310136	-0.00798858	0.123658	0.0459642	-0.0128165	0.00508389	0.00128639	0.0870298	0.0294821	0.0621389	0.0744983	0.0100471	0.0398026	0.0672813
grn	0.0438393	0.028378	0.0390384	-0.00170661	-0.00201834	0.0481382	-0.00560769	0.0137682	0.0441823	0.111976	-0.00614125	0.0868228	-0.00488724	0.0808151	0.0736972	0.0154649	0.00220884	0.0188488	0.0235938	-0.0100768	0.0229065	0.0230567	-0.0068549	0.027693	0.00633152	0.139846	0.00307008	-0.00156768	-0.00804717	0.0384987	-0.00713699	-0.0157773	0.000574654	0.00803407	-0.0169846	-0.00216061	-0.0189056	0.0199904	0.00852269	-0.013209	0.0183122	0.000671937	0.0966657	0.00243313	0.0203633	0.0345997	0.0096665	0.0174018	0.0510779
gsb	0.000530239	0.00298988	0.0182886	0.030093	0.00701856	0.00910961	-0.00182119	-0.00218902	0.0399135	0.00730898	0.0233414	0.0112364	-0.000531023	-0.00830737	0.0286126	0.0106097	0.0354513	0.00998298	0.013356	-0.00149261	0.00673546	0.00408494	0.00915567	0.00403546	0.0351026	0.02493	0.0112905	-0.00316136	0.0155092	-0.00636675	0.0345389	0.0191185	0.0211835	0.00874194	0.0295586	-0.0087391	0.0164809	0.0208149	0.0238378	-0.00580335	0.00630685	-0.00131881	0.0372424	0.0178521	0.00437447	0.0130918	-0.00218902	0.0183385	0.0351019
gsb-n	0.0711352	0.039887	0.00724444	-0.00333521	0.0134466	0.069023	0.0103805	-0.00453283	0.00127555	0.111452	0.00250882	-0.00207509	-0.0111576	0.122279	0.00324363	-0.00426314	0.00761621	-0.00572672	0.0352158	0.0150156	0.00166767	0.0302445	0.00381141	0.0472549	0.0140301	-0.000421909	0.0221314	-0.00131472	0.022358	0.119444	-0.00694917	-0.00253189	-0.000333107	0.0280214	-0.0187697	0.068322	-0.0115239	0.0115872	0.00514914	0.00805289	0.026516	0.00129336	0.0318873	0.016174	0.0153645	0.0312409	0.0131314	0.015414	0.0423343
gt	-0.00638523	0.00310391	-0.00671272	0.0553904	-0.00335099	-0.00575885	-0.0013478	0.0144294	-0.00389745	-0.00669759	0.0096136	-0.00528572	-0.00398769	-0.00883364	-0.00398769	-0.00152363	0.0234566	-0.00383166	-0.00410087	0.00753827	-0.00341101	0.0153381	0.0270007	0.00635661	-0.00155642	-0.00901958	-0.00145584	-0.00666952	0.0302482	0.0130265	0.0659858	0.043375	0.0230193	-0.00174027	0.0362163	-0.00431017	0.0639079	0.000363305	0.00144825	-0.00429485	-0.00716461	-0.00430669	-0.00274659	-0.00100448	-0.00397491	0.0045778	-0.00162002	-0.00185275	-0.00508856
ham	0.00217449	-0.00633479	-0.00260876	0.06533	0.00220103	-0.00338897	-0.00165969	-0.0019949	-0.00339667	-0.00638302	0.0165172	-0.00650888	-0.00491047	-0.0144697	-0.00491047	-0.00187621	0.0308667	0.000820245	-0.00504985	0.0121138	0.0082332	0.0145761	0.0285743	-0.00769222	-0.00191659	0.00325109	-0.00179274	-0.00180055	0.0351913	-0.0103638	0.0722148	0.0730983	0.0219118	-0.00214298	0.0591357	-0.0144872	0.0924272	-0.00265983	0.0114715	-0.00528871	-0.0113828	-0.00530329	-0.00659123	-0.00123693	-0.00489474	-0.00407013	-0.0019949	-0.0022815	-0.0062661
hb	-0.00719411	0.00091988	-0.00325202	0.0236081	0.00631274	-0.00452362	0.00395848	0.0082265	0.00248278	-0.00252093	0.0034025	0.0034336	0.0760442	-0.0238266	-0.000306295	0.00926884	0.0533745	-0.00742825	-0.010784	-0.00596845	-0.00302581	0.00887386	0.00776761	0.00318425	0.00240518	-0.00884657	0.00311807	0.100485	0.0131919	-0.00813307	0.0457576	0.00912077	0.00931079	0.00123616	0.0189751	-0.0253819	0.037423	-0.00847821	0.00299845	-0.00183596	0.0763108	0.10658	-0.014475	-0.00264148	-0.000240266	-0.00562525	0.00198318	-0.00487216	-0.00738277
hbn	0.00413204	-0.00177375	0.0258417	0.00204982	-0.00440954	-0.00411032	-0.00177355	-0.00213177	0.00100811	-0.00424447	0.00610718	-0.00695544	0.0545836	-0.0168363	-0.00524736	-0.00200493	-0.00611642	0.000145267	-0.0053963	0.0129819	0.00133397	0.0199637	-0.0024137	0.01099	0.0488733	-0.00290394	-0.00191573	0.426635	-0.00226265	0.0108594	-0.0029026	-0.00202417	0.00221885	-0.00229	0.00617976	-0.0138056	0.0255935	-0.00647603	-0.00863273	0.00824546	0.278347	0.37315	-0.00396551	-0.00132179	0.0147767	0.0016583	-0.00213177	0.00825899	-0.00669599
her	0.0382632	0.0106318	0.0717953	0.0377244	0.0640025	0.0318566	0.0243204	0.0195037	0.0904952	0.0313605	0.0128719	0.05974	0.0119724	0.0283831	0.06105	0.0443016	0.0161527	0.0268486	0.0330146	0.0195255	0.0262367	0.0245891	0.0471729	0.0280431	0.0204906	0.0448742	0.0100332	0.0492909	0.004412	0.0379483	0.00281126	0.00479142	0.025512	0.0483854	0.0170746	0.0323818	0.0109936	0.0758176	0.0367594	0.0143996	0.075163	0.047397	0.0667186	0.016165	0.0120481	0.0381385	0.0413937	0.0259872	0.0731261
hkb	0.124785	0.0432445	0.0409304	0.0946559	0.0619194	0.0919203	0.033203	0.01152	0.119882	0.0689823	0.0560854	0.0325941	0.0311843	0.115911	0.0403742	0.0286574	0.00835382	0.0586273	0.0656026	0.0257836	0.021229	0.0263972	0.128828	0.0356444	0.0122711	0.0754724	0.0386518	0.0298296	0.0242215	0.11746	0.0197746	0.0114887	0.0445715	0.0521999	0.0225171	0.118498	0.00735826	0.162308	0.0457858	0.0134645	0.040079	0.0190535	0.122495	0.034168	0.0190466	0.118336	0.0415791	0.0222749	0.0756181
hng1	0.00870513	0.0192404	0.0221174	-0.00592266	-0.00415378	0.0112537	-0.00167068	-0.00200812	0.0108226	-0.00462284	-0.00272928	0.0214646	0.0109238	0.00252787	0.000345915	0.0119056	-0.0012176	0.0172606	6.08452e-05	0.00597693	0.0081245	0.0143529	0.0154085	0.0160304	0.0520866	0.0125938	-0.00180462	0.0649951	-0.00468901	0.0326629	0.0059408	0.00554112	0.0125526	-0.00215718	0.000295884	0.0232689	-0.00339728	0.0122771	-0.00165774	0.0143317	0.0528917	0.0191639	0.0160557	-0.00124513	0.0162959	0.021394	-0.00200812	-0.00229661	0.0186241
hng2	0.0189216	0.0106698	0.0106578	-0.0046811	-0.00328303	0.00828893	-0.00132046	-0.00158716	0.0071708	0.0128499	-0.00215714	-0.000125932	-0.00390681	0.0179111	-0.00390681	0.0159211	-0.00455385	0.00319248	-0.0040177	0.00423477	0.0200492	0.00579613	-0.00481525	-0.0018326	-0.00152486	0.00917083	-0.00142632	0.0055292	-0.00631081	0.0121078	0.0105121	-0.00620815	-0.00686723	-0.00170497	-0.00451556	0.0133854	3.55934e-05	0.0082512	0.00174581	0.0019955	0.00365629	0.00196701	0.0106901	-0.000984113	0.00280371	0.00480676	-0.00158716	-0.00181518	0.0159971
ind	0.0215824	0.0812104	-0.00348698	0.109754	0.112187	0.0173888	0.0492394	0.0122363	0.0661156	0.0179759	0.142652	-0.00168541	0.00119205	0.0767091	0.00693342	-0.00173822	0.0144284	0.0792548	0.0623322	0.0176308	0.0363368	0.00553339	0.0877537	0.00762057	-0.00177563	0.015518	0.0766929	-0.000693229	0.0141165	0.0980414	0.029798	0.0218545	0.03812	0.0111272	0.0355366	0.139945	0.00721087	0.089849	0.0206282	0.0057687	-0.00261547	-0.00491325	0.0645118	0.0669716	0.0761006	0.023901	-0.00184819	-0.0021137	0.0483238
insv	-0.0234577	-0.0194601	0.0116512	-0.0143699	0.00448655	-0.0211347	-0.00095712	0.00314394	0.00372072	-0.0440032	-0.00346046	0.000353053	-0.00720817	-0.0851372	0.00224479	0.0075928	-0.0100688	0.00474617	-0.00665797	-0.0296714	0.00473266	0.0111787	-0.0134533	-0.00230021	0.0176671	0.00319489	0.00326637	0.0606299	-0.0169003	-0.0284411	-0.00651116	-0.0122591	-0.00929635	-0.0108311	-0.0305135	-0.0883086	-0.0149779	-0.0131853	-0.0158017	-0.023868	0.0911485	0.0353826	-0.0266608	0.000671285	0.0119287	-0.00614391	0.000567314	0.0107026	-0.00980257
inv	-0.00429406	0.0305161	0.0168972	0.0216104	0.00516378	-0.00276147	0.0106793	0.018722	0.012054	-0.00804329	-0.00335258	0.0148286	0.110532	-0.0129378	-0.0017532	0.00894373	0.0263165	-0.0058343	-0.0062442	0.0182065	-0.00519379	0.00986185	0.00305018	0.00712759	0.00865678	-0.00402731	-0.00221674	0.236937	0.000956001	0.00347934	0.035763	-0.00691395	0.0165827	-0.00264983	0.015251	-0.00627086	0.0169856	0.00641296	-0.00205931	0.0335845	0.153737	0.205521	0.00271496	-0.00152948	0.00694487	-0.00503278	-0.00246673	-0.0028211	-0.00435512
jigr1	-0.00907808	0.00431332	-0.0135187	0.0743211	0.000726952	-0.00497437	-0.0019162	-0.00230323	-0.00307319	-0.0128912	0.0135567	-0.00751487	-0.00566941	-0.0226998	-0.00566941	-0.00216619	0.00926873	-0.000641047	-0.00133686	0.0131743	-0.00484954	-0.00424343	0.0230622	-0.00591446	-0.00221281	-0.00867002	-0.00206982	-0.00391743	0.0282657	-0.0144597	0.0716162	0.0787515	0.0324445	-0.00247419	0.0452104	-0.0228807	0.102775	-0.00480648	-0.00367172	-0.00181382	-0.00880109	-0.00184234	-0.0112108	-0.00142811	-0.00101661	-0.0046992	-0.00230323	-0.00263411	-0.00723456
jing	0.0487123	0.0385732	0.0462249	0.0240752	0.0423538	0.0373841	0.00512885	0.0030907	0.00532788	0.0227746	0.004984	0.000318744	-0.00377856	0.0698633	-0.00377856	0.0111089	0.00113474	0.00855115	0.0232228	0.000506806	0.00840713	0.0758345	0.0457022	0.0232679	0.010722	0.00784861	0.0042574	0.00122961	0.0234384	0.103953	0.00316903	0.00288803	0.00771088	0.0152081	-0.00807579	0.0888674	-0.003627	0.0345831	0.0224719	0.00557426	0.0258365	0.0028911	0.0415876	0.00877815	0.0104119	0.0329613	0.0169239	0.00167347	0.0167795
jumu	0.0101945	0.00158596	0.00389382	0.0157469	0.103552	0.0043319	-0.000792553	0.0262713	0.0497003	0.0132586	-0.00129474	0.0136878	0.0087526	0.0170437	-0.0023449	-0.00089595	-0.00273326	-0.00225316	0.00838228	0.0144906	-0.0020058	0.00097188	0.0422241	0.00345287	-0.000915232	-0.00530384	-0.000856088	0.00276171	-0.0037878	0.0211188	-0.00302749	0.0173547	0.0213464	-0.00102334	-0.000770492	0.0181961	0.00774813	0.0147665	0.0233116	0.00778499	0.0199078	-0.00253249	0.0329624	-0.000590673	0.00879547	0.0114281	0.0262713	-0.00108949	0.0318831
kay	0.0183113	0.0103201	0.0289295	0.00430541	0.0100063	0.0136707	-0.00152169	0.0550928	0.0481327	0.0205192	-0.00248588	0.0159813	0.0129005	0.0162486	0.0303031	0.0285388	0.00471999	0.0198148	0.00101212	0.0114655	0.00969729	0.0175726	0.018033	0.00784725	-0.00175724	0.068043	-0.00164368	0.00993826	0.0035713	0.0220162	-0.00581275	-0.00715424	0.00539898	-0.0019648	-0.000285979	0.00950043	-0.00834415	0.0282881	0.0103456	0.016709	0.0302798	0.0112621	0.0359087	-0.00113409	0.0246091	0.0102476	0.0266319	0.0227991	0.0215999
ken	0.0379752	0.0190658	0.0123113	0.0409839	0.0307709	0.0258686	0.0115609	0.0020402	0.0317993	0.0244909	0.0173459	-0.00414126	0.0816803	0.0294155	-0.00275212	0.00936187	0.044999	0.00595167	0.0266041	0.0330125	4.37696e-05	0.0247547	0.0620363	0.0115951	0.00899528	0.000565775	0.00317641	0.113538	0.0182297	0.0257125	0.0660194	0.027172	0.0315805	0.0129795	0.0363592	0.0253646	0.0434108	0.00913442	0.0313904	0.00303168	0.0826913	0.0906757	0.023804	-0.00262673	0.00500588	0.0221856	0.00831674	0.00613354	0.0128254
klu	0.00344831	0.00990146	0.0305969	0.080487	0.00973647	-0.00660372	0.0152945	-0.00185769	0.0100253	0.00747508	0.0181079	0.0155526	0.00113959	-0.000833184	0.0125642	-0.00174716	0.0388402	-0.0043938	0.000853444	0.0046223	0.00943009	0.00250943	0.0408081	0.00384117	-0.00178476	0.00763128	-0.00166943	-0.000767363	0.0495643	-0.00219495	0.0473327	0.0469894	0.0312907	-0.00199558	0.0459868	0.00500409	0.0600031	0.0113715	0.00646227	-0.00492494	-0.000973093	-0.00493851	-0.00525135	-0.00115185	0.00690295	0.00309275	-0.00185769	0.0101309	-0.00583509
kni	0.107846	0.043554	0.0571684	-0.00400905	0.00769011	0.0811462	0.00800749	0.00445176	0.0106624	0.159385	-0.00120003	0.0172409	-0.00503994	0.233253	0.0060309	0.0221143	-0.000240342	0.00439055	0.0448741	0.00464754	0.00518228	0.0556124	0.00519728	0.105325	0.00924697	0.0637767	0.0108078	-0.00292066	0.0157678	0.106183	-0.0117879	-0.00908674	0.0133635	0.0320117	-0.0236697	0.0379464	-0.0164162	0.0225556	0.00961349	-0.00436121	0.0719023	0.00873477	0.0657794	0.0080527	0.00616317	0.0463163	0.0393698	0.00874544	0.0606746
knrl	-0.0079099	0.0922178	0.025998	0.0408045	0.0156581	-0.00370966	-0.00317113	0.0170127	0.0161996	-0.00443642	0.00503999	-0.00387124	0.134927	-0.0192599	-0.00372314	0.0259351	0.023099	-0.00312745	-0.00964864	0.024476	-0.00802552	0.020152	0.0160434	0.00892358	0.0396862	-0.00850223	0.0274675	0.181991	0.0077655	0.0298478	0.0230476	0.0209251	0.0257177	-0.00409455	0.0188317	0.00583597	0.0319503	0.00104783	-0.00331222	0.029329	0.161359	0.136687	-0.00681669	-0.00236338	0.010518	-0.000957795	0.0239541	-0.00435921	-0.00530322
l(1)sc	-0.00299629	0.0239377	0.0894151	0.0264232	-0.0037695	0.000366483	0.00323477	0.0129897	0.0216575	0.0150732	-0.00189469	0.0157944	0.119948	0.00473998	0.00784804	0.0205908	0.00125125	0.00657685	0.0023673	0.0200194	0.00153282	0.0564358	-0.00220939	0.028351	0.0260646	0.0281992	0.00891907	0.390603	0.00117581	0.0557727	0.000316276	-0.00878797	0.0089924	0.000545193	-0.00937678	0.00564045	0.0155717	0.0058325	-0.0111805	0.0233573	0.416162	0.288418	0.0070328	-0.00282949	0.0294791	0.0165544	0.00713867	-0.00521894	-0.00121666
l(3)neo38	0.0285276	0.0407889	0.13521	0.008615	0.00822673	0.00940739	0.0130155	0.00472112	0.00655967	0.0251641	-0.000932168	-0.00246525	-0.0077996	0.0409274	0.00983315	-0.00247415	-0.00377546	0.00827994	0.0304203	-0.0150766	0.00382072	0.120128	0.00199201	0.0478571	0.00138747	0.0506732	0.00239162	-0.00692667	0.00582546	0.0843003	-0.00132381	0.00277295	0.000653734	0.00338187	-0.00261939	0.0648692	-0.0104442	0.00828194	0.0174581	-0.0157805	0.0570712	0.000497389	0.0837028	0.00195202	0.0196243	-0.000916472	0.00865348	0.00566392	0.0306686
lab	0.126877	0.0340077	0.0702269	0.0624614	0.040501	0.105586	0.00532151	0.00867043	0.141422	0.0395297	0.0413397	0.101017	-0.010907	0.110462	0.11563	0.00662021	0.0129761	0.0987953	0.0950847	-0.00973493	0.0391784	0.00837811	0.0695273	0.0257055	-0.000955472	0.164581	0.0304178	-0.0202852	0.00478238	0.0599842	0.0100685	-0.00110183	0.0219577	0.0322773	0.0196866	0.251186	-0.00567355	0.111995	0.0443424	-0.0170629	-0.0301628	-0.0184266	0.256808	0.033295	0.0268538	0.0683409	0.0154927	0.0470923	0.108035
lbe	0.011221	0.00108171	0.00184291	0.00442486	-0.00375337	0.0138817	-0.00150964	0.0125284	0.00116364	0.0082626	-0.00246618	0.0162021	-0.00446651	0.00530969	0.0364607	0.0135426	-0.000182929	0.00179117	0.00109342	0.00839965	-0.00382059	-0.00294947	-0.0055051	0.00802096	-0.00174331	0.0109227	-0.00163066	0.0206999	-0.00721492	0.00654462	0.0033149	-0.00709755	-0.00449654	0.0247573	-0.00189213	-0.00734818	0.0140232	0.0153425	0.00696615	0.00605369	0.0398863	0.0222629	0.00891586	0.0219975	0.0190093	0.00334277	-0.00181454	0.0104687	0.00808106
lilli	0.018258	0.039092	0.03055	0.0887505	0.0974146	0.0222944	0.0342601	0.00751097	0.117402	0.00399045	0.0113523	0.0289405	0.0142126	0.0374587	0.0224474	0.0297807	0.0173325	0.0795495	0.069534	0.00242813	0.0330134	0.00405064	0.129398	0.00587811	0.0185376	0.061465	0.0201492	-0.00322221	0.010228	0.0548657	0.0269449	0.00551351	0.0360414	0.0160255	0.0229677	0.104933	0.00837801	0.0987068	0.0222743	-0.00304008	0.016038	-0.00306942	0.0413489	0.0146777	0.0927786	0.0294447	0.0176116	0.0147056	0.0177447
lmd	0.0333467	0.0540418	0.0159491	0.189884	0.0793938	0.00728831	0.0228347	0.00350443	0.0829776	0.00886995	0.111333	0.0101558	-0.000270234	0.0603299	0.00558564	0.00417706	0.0422736	0.0522244	0.0362536	0.0215676	0.0298666	0.0117376	0.19595	-0.00666252	-0.00353386	0.0137405	0.0286611	-0.0116164	0.052879	0.0828616	0.0724461	0.0449399	0.0714383	-0.00395128	0.0833715	0.142494	0.0598005	0.0987901	0.0370748	-0.00703116	-0.0164684	-0.00706545	0.0599846	0.020878	0.0409085	0.0313029	0.0178698	0.00207505	0.0206514
lms	0.147406	0.080228	0.0151795	0.0670152	0.0633791	0.120718	0.0198342	0.00233579	0.113515	0.0476719	0.0419006	0.0363245	0.00827822	0.172003	0.0450956	0.023565	0.0130456	0.0887634	0.145609	0.0246462	0.012832	-0.00145659	0.126495	0.0364806	0.0161898	0.0539243	0.0609028	-0.00110508	0.013132	0.224225	0.00938707	0.0105454	0.0244401	0.0376222	0.0235943	0.268669	0.0055854	0.118077	0.0428891	0.00374911	0.000720703	0.00124245	0.111443	0.0598501	0.0479422	0.118353	0.0410438	0.0460722	0.123438
lola	0.081475	0.0691402	-0.00263963	0.0124897	0.0437119	0.0690524	0.0296684	0.0277087	0.0149401	0.0411236	0.00631747	-0.000901126	-0.00233476	0.206999	-0.00427966	0.0301572	0.000386381	0.0128488	0.0726148	0.0731772	0.017547	0.0116596	0.0412478	0.0692321	0.0342607	0.00242028	0.0267382	4.48686e-06	0.0622112	0.424441	0.0106184	-0.00254916	0.00774409	0.0338657	-0.0108149	0.171963	-0.00793849	0.0425995	0.028148	0.0734589	0.0310574	0.00469816	0.0204711	0.00416404	0.0309159	0.0352617	0.0467933	0.00601143	0.0890915
lov	0.0363826	0.00103123	0.0196029	0.0142905	0.0138034	0.0203583	0.00578945	0.00370727	0.0254084	0.0303933	0.016639	0.00176673	0.00602853	0.0145903	-0.00291817	0.0121623	0.0127063	0.0069784	0.0256725	0.0209017	-0.000632851	0.0277893	0.0326968	0.0205556	-0.00346696	0.0187844	0.00489692	0.00130836	0.0358249	0.0459203	0.016325	0.0179871	0.032295	0.0233678	0.0391245	0.0158338	0.0111627	0.0164525	0.0182422	-0.00402535	0.0188163	-0.00130361	0.050311	-0.0022375	0.00311276	0.0393514	0.018339	0.027864	0.0425545
luna	0.0134304	0.0109771	0.0489601	-0.00129156	0.0277577	0.0152158	-0.000364328	-0.000437913	0.0502152	0.00559424	-0.000595176	0.0533196	-0.00107793	-0.00546055	0.0471535	-0.000411858	-0.00125645	0.0240541	0.0692583	0.0116111	-0.000922043	-0.00214623	0.0182788	-0.00168856	-0.000420722	0.0192423	-0.000393534	-0.00180286	0.0283125	0.0155177	0.0173374	-0.00171289	0.0396135	-0.000470418	-0.0035643	-0.00564964	-0.00199778	0.0392175	0.0129869	-0.00116096	-0.00359353	-0.00116416	0.00662047	-0.000271526	0.0473106	-0.000893459	-0.000437913	0.154716	0.0365179
maf-S	0.0649161	0.0109726	0.0127522	0.020309	-0.00161627	0.0630627	-0.000650077	-0.000781376	0.0476653	0.0188294	-0.00106198	0.0281527	0.0386479	0.00787954	0.0386479	-0.000734887	0.00937722	0.026292	0.0243292	0.0117395	-0.00164522	0.0167924	0.0196205	0.0056712	0.0337789	0.0199658	0.0362101	-0.00321688	0.00531997	0.0256796	-0.00248324	-0.00305634	0.0198964	0.0918206	0.00640511	0.0184973	-0.00356468	0.0504061	0.0133905	0.0356226	-0.00218868	-0.00207723	0.032025	-0.000484489	0.0252165	0.0147009	0.0987462	0.0571353	0.0294208
mid	-0.00412126	0.0170052	0.0622455	0.0256707	7.51839e-05	-0.00173923	0.00615376	0.00404489	0.0172309	0.0317966	0.000799666	0.0258137	0.148177	0.00647428	0.00676408	0.00472938	0.000532596	0.0109201	-0.0028711	0.0225336	0.0034078	0.0156773	-0.00560927	0.0102061	0.0358868	0.03028	0.0052486	0.435514	-0.00624074	0.0310519	0.00560038	-0.00783711	-0.00101859	0.00326496	-0.0110496	0.00166285	0.0108504	0.0126919	-0.00851493	0.019292	0.394685	0.352453	0.0135899	-0.00216805	0.0315126	0.0224995	0.0115864	0.00919212	-0.00615247
mirr	0.0601143	0.0128535	0.0976901	0.0158149	0.00768342	0.0745246	0.00800398	0.0238441	0.117665	0.0415607	0.0016524	0.152449	0.0028609	0.0298705	0.140433	0.038605	0.00111079	0.038932	0.0556259	-0.0113543	0.032875	0.0194215	0.0129025	0.0179729	-0.00690679	0.259222	-0.00214444	-0.00483562	-0.00986354	-0.00410045	0.00294276	-0.0161043	0.0106282	0.0175576	0.00118904	0.0375723	-0.0112555	0.0540046	0.029926	-0.0146514	0.0071785	-0.00152965	0.238442	0.00804973	0.0156737	0.0672619	0.00832753	0.0494517	0.0830185
mld	-0.00170634	-0.00351103	0.00480574	0.0248719	-0.00246337	0.00301867	-0.00261817	0.00520397	0.0131941	0.0109158	0.00187076	-0.00253955	0.145441	-0.0133646	-0.00434215	0.0059188	0.0143687	-0.00390155	-0.00796618	0.00903402	-0.00265074	0.0209129	0.00705907	0.00535305	-0.00302344	-0.00527945	-0.00282806	0.14696	0.0150625	0.00608395	0.0243681	0.0157125	0.00396175	0.00439414	0.00544642	-0.0175806	0.00790251	-0.00406802	0.0122588	0.0201218	0.124071	0.124108	-0.00560192	-0.00195127	0.00252354	-0.0023189	0.00520397	0.00370437	-0.00453581
nau	0.155183	0.0253478	0.0336758	0.0189144	0.0261398	0.138221	0.0278024	0.0283689	0.0600209	0.0635725	0.0135589	0.0567468	0.0216898	0.102463	0.0878446	0.0168594	0.0155508	0.0564033	0.0720102	0.0324642	0.0161125	0.0162767	0.0220191	0.052203	-0.00392826	0.121163	0.0541067	0.0118535	0.00517787	0.0647009	0.00139163	-0.00593966	0.0126734	0.0802181	0.00252099	0.0987894	-0.00567595	0.0588661	0.0368901	0.0309554	0.0218149	0.0136488	0.167373	0.00792988	-0.00472305	0.0618043	0.0608265	0.0407419	0.10566
nerfin-1	0.0821395	0.0198027	0.0782915	-0.00205955	0.0130047	0.0663194	0.00974523	-0.00232701	0.0173813	0.0268647	0.00351629	-0.000545915	-0.00579398	0.0758296	0.0027912	0.0162413	-0.00548507	0.00954312	0.0485784	0.0115997	0.00628288	0.0578449	0.0150621	0.0784277	0.0112537	0.0191639	0.0128697	0.0175453	0.0167957	0.139517	-0.0167812	0.000515801	-0.000709608	0.028269	-0.00838486	0.0974192	-0.0111197	0.0339139	0.0187092	0.00659302	0.0825376	0.00807101	0.0943392	0.00952641	0.0304631	0.0445878	0.0313703	0.0367271	0.0738904
nerfin-2	-0.00758706	-0.00458175	0.0136619	0.0174603	-0.00212299	-0.00105022	0.00782604	0.00557521	0.00884511	0.00511125	0.00220719	0.0060189	0.171727	-0.0143176	-0.00749689	0.00630106	0.0244734	0.00742102	-0.000873675	0.00627545	0.00589876	0.0100804	-0.000668438	-0.00271742	0.00604656	-0.00747895	-0.002737	0.188526	0.00321822	0.00439272	0.0121548	-0.000787001	0.000935864	-0.00327172	-0.00599298	-0.0207275	0.0167438	-0.00131484	0.00272273	0.0115155	0.152794	0.203549	-0.0113537	-0.00188844	-0.000422094	0.00225477	0.00557521	0.00405631	-0.00680559
nom	0.00828369	-0.00972608	0.0540975	-0.0035057	0.000274226	-0.00836679	0.00240029	-0.004949	0.0155766	0.005728	-0.00273348	0.0357176	0.0010832	0.0328812	-0.00112766	-0.00465455	-0.00660156	-0.00250467	-0.00607671	0.00171625	0.0102343	0.021819	-0.00782442	0.030606	-0.00475472	0.0271052	-0.00444746	0.0182395	-0.0141675	0.0261637	-0.00370885	-0.00535862	0.0141038	0.00983172	-0.00897904	-0.00217872	-0.00812114	0.00855072	0.0178479	0.021799	0.0498349	0.0237163	0.0122752	-0.0030686	0.0100361	0.00588635	-0.004949	-0.00565998	0.00182478
nub	-6.53299e-05	0.0172094	0.0634217	0.0158306	0.00485486	0.00311138	-0.00328249	-0.00394547	0.0233841	0.015566	0.0144148	0.011988	0.110748	-0.000441547	0.00123909	0.0248508	0.00514483	0.0134547	0.00332647	0.0194664	0.00767806	0.0363255	0.00361135	0.0252206	0.0521304	0.0174134	-0.00354564	0.425644	-0.00715826	0.0525117	0.00234463	-0.00849849	0.00020709	0.0020143	-0.00627218	-0.00230522	0.00885273	0.00611441	-0.00257222	0.00988873	0.42332	0.311666	0.00674905	0.00838072	0.0342625	0.0117428	0.00948666	0.00136135	0.000512552
oc	0.0842835	0.0429327	0.0398595	5.03069e-05	0.00965417	0.048356	0.00804978	0.000604519	-0.000325883	0.206686	-0.00115979	0.0221751	-0.00814232	0.211744	0.0124593	0.00152237	-0.000150755	-0.00212136	0.0342546	-0.00499703	0.0108108	0.0446014	0.0117454	0.0639365	0.00524955	0.0370108	0.0022069	-0.0113872	-0.00678746	0.0795085	-0.00925039	-0.0109892	0.0107986	0.0212519	-0.0179773	0.0729211	-0.0223508	0.0200354	0.00491024	-0.00723151	0.0267744	-0.00731598	0.0413016	0.00808843	0.00148326	0.0388359	0.0200426	0.015599	0.0434648
odd	0.189765	0.0378441	0.0172225	0.00297684	-0.000298808	0.107317	-0.00211998	-0.00254816	0.0653021	0.0618351	0.00409149	0.0898194	-0.00208915	0.0781566	0.0815741	0.0303343	-0.000123066	0.0549031	0.0871289	0.00518325	0.0092899	0.0109003	0.00247262	0.0761321	0.0189133	0.0948743	0.00912779	-0.00797125	0.0133274	0.0496986	-0.00484935	-0.00731827	0.000974999	0.0832474	-0.00231407	0.0519872	-0.00706601	0.0340562	0.0229656	0.0126771	0.00913601	-0.00289815	0.144063	0.0480505	0.00214077	0.0956094	0.0590236	0.0778585	0.126744
onecut	0.0476428	0.00520413	0.0538294	0.0181602	0.018249	0.0461111	0.00873434	0.000361283	0.0220224	0.0324564	0.0287554	0.00850129	-0.0101333	0.0283347	0.0139313	0.00670395	0.0251097	0.022302	0.0277576	0.0184247	0.00223459	0.0288432	0.0203882	0.046725	0.000776773	0.0104837	0.00744414	0.0347306	-0.00354433	0.0385568	0.0044809	0.0718479	0.00721139	0.0246015	0.00537616	0.0431384	-0.00972235	0.0328624	0.015883	0.0151856	0.0450074	0.0252066	0.0636851	0.0228518	0.0272224	0.0372357	0.027195	0.00835614	0.0306845
org-1	0.0769128	0.0271888	0.00647548	0.00515835	0.0331957	0.0652595	-0.00088625	0.0232886	0.0542322	0.0139331	-0.0014478	0.026575	-0.00262212	0.0319953	0.0370882	-0.00100187	0.00547303	0.0284663	0.0745501	0.012021	-0.00224293	0.00991745	0.0532697	0.0150171	-0.00102343	0.0386945	-0.000957297	-0.00438557	-0.00423561	0.0357815	0.0197449	0.020978	0.00108677	0.0668759	0.0100707	0.0470952	-0.00485972	0.0179232	0.00783875	-0.0028241	-0.00564121	-0.00283188	0.0786333	0.0778622	-0.00261372	0.0456747	0.0232886	-0.00121829	0.0590514
otp	0.134843	0.0267918	0.0342254	0.0213915	0.041188	0.0818716	-0.00266055	0.0132458	0.0397513	0.0884331	0.0319706	0.00985608	0.0189406	0.0860506	0.0122375	0.00573362	0.0224993	0.00289705	0.0668801	0.0197506	0.0128361	0.0541726	0.0638722	0.0522336	0.00548496	0.0409505	0.0245696	0.00701945	0.0394943	0.0698412	0.018469	0.00446905	0.0303902	0.0424917	0.0140421	0.036649	-0.00180526	0.0298568	0.0280767	0.00397741	0.023997	0.00392012	0.101419	0.0245263	0.0190512	0.0378974	0.0872422	0.0035332	0.0900152
p53	0.00895372	0.0119845	0.0249024	-0.00301835	0.0101639	0.00354813	-0.000851426	-0.00102339	0.00648837	0.00394814	-0.00139091	-0.00333908	0.00781319	-0.00378515	-0.00251909	0.0259855	-0.0029363	-0.00242053	0.00745887	0.0186924	0.00991112	0.0317469	0.00529585	0.0093234	-0.000983219	0.00823552	0.0272817	0.00200951	0.00236902	0.0127311	-0.00325238	-0.00400298	-0.00442795	0.0224984	0.00142286	-0.00883631	0.000961294	0.0131523	0.0274756	0.016486	0.0464554	-0.00272061	-0.00254394	-0.00063455	0.00785419	-0.00208799	-0.00102339	-0.00117042	-0.00321453
pan	0.0614601	0.0345946	0.0442918	0.104526	0.0663102	0.0370908	0.0208071	0.00272228	0.0983731	0.0721249	0.107826	0.0262552	0.00387053	0.0766569	0.00932165	0.0104892	0.0214106	0.0218167	0.0694943	0.0146274	0.0298482	0.0332168	0.132015	0.0179689	0.0240279	0.050215	0.0410733	0.00502027	0.0317921	0.0883044	0.036088	0.0310926	0.0469631	0.0330909	0.0449153	0.115312	0.00567886	0.146935	0.059017	-0.000379739	0.00917886	0.00461446	0.0961041	0.0191001	0.0504273	0.0477423	-0.00396393	0.0188567	0.0453657
pb	0.0164843	-0.00452037	0.0542007	0.00613238	0.0364514	0.00402229	-0.000815126	-0.000979761	0.0363975	0.0358133	-0.00133161	0.0131354	-0.00241169	0.013563	0.0299614	-0.000921469	0.00646015	0.0201365	0.0185111	0.00173009	0.0105387	0.028108	0.0145749	0.00315144	0.026611	0.0333503	0.028573	0.0219625	0.00282835	0.0141475	-0.00311372	-0.00383231	0.0452905	-0.00105249	0.00560618	0.0215648	0.00141031	0.0202601	0.0092419	-0.00259746	0.0357691	0.00739385	0.0274841	-0.000607496	0.0192468	0.0110034	-0.000979761	-0.00112052	0.00540057
pdm2	-0.00202307	0.00353589	0.0308027	-0.00466476	0.00469187	-0.000962548	-0.00131585	0.0148544	0.0145014	0.00332932	-0.00214961	-9.02832e-05	0.183705	0.00355999	-0.00389317	-0.00148752	-0.00453795	0.00322974	0.00251288	-0.00699297	-0.00333017	0.0160871	-0.00479844	0.00250597	0.0155872	-0.00278244	-0.00142134	0.171035	0.00206089	0.00130805	0.000176962	-0.00194405	0.0085328	-0.00169902	-0.00654925	-0.00058352	0.00373698	0.0121372	-0.00640488	-0.00419306	0.135577	0.194447	-0.00231434	-0.000980677	-0.0038807	0.00484604	-0.00158162	-0.00180884	0.00555978
peb	0.00321987	0.00756712	0.0133791	0.0528601	0.0376003	0.0197685	-0.000792553	-0.000952628	0.0256669	0.0212449	0.0187472	0.0052898	-0.0023449	0.0266845	0.0087526	-0.00089595	0.035405	-0.00225316	0.019176	0.0207247	0.0109537	0.0122534	0.0332013	-0.00367327	0.0274196	0.0146499	0.0294339	0.00944533	0.0100422	0.0392517	0.00559122	0.0314087	0.0213464	-0.00102334	0.013196	0.0181961	0.0137952	0.0336937	0.00972695	-0.00252553	0.0129765	-0.00253249	0.0155868	0.0432974	0.00879547	0.0247998	0.0262713	-0.00108949	0.0144454
pho	0.0276645	0.0293222	0.0160812	0.00779784	-0.00177069	0.0313051	-0.000712188	-0.000856033	0.0896532	0.00285823	0.043432	0.0626095	0.022586	0.0054146	0.022586	-0.000805102	-0.00245611	0.0365112	0.0818933	0.0100868	0.0126158	0.00208019	-0.00259709	-0.00330081	0.0307015	0.0229834	0.0329299	0.00391165	-0.00340372	0.00526943	0.016457	0.00446953	0.0246309	0.0272785	-0.00308289	0.00982844	0.00282238	0.0453953	0.0116471	0.00920156	-0.00316893	0.00916407	0.0331517	-0.000530779	0.0474432	-0.00174653	0.05972	0.0519987	0.045812
phol	0.0597973	0.109783	0.0211058	0.036031	0.0600613	0.0480157	0.0205332	0.0147622	0.0301594	0.0242855	0.0280674	0.00403777	-0.00646405	0.220603	0.00111658	0.00871297	0.00828744	0.0373424	0.0501867	0.0705109	0.0177355	0.0608502	0.063372	0.0477857	0.0469379	-0.00116416	0.0263174	0.082128	0.0568803	0.438147	0.0160288	0.00597515	0.0125506	0.0161244	0.00291734	0.275477	-0.000587899	0.0756135	0.0510721	0.0673086	0.122669	0.0543726	0.0320829	0.00730835	0.0407839	0.0320863	0.0110429	-0.00213315	0.0501257
pita	0.00268472	0.085556	0.0114461	0.00865641	0.0194778	-0.00094077	-0.00280856	0.0356335	0.00688171	-0.0123239	0.00689916	0.0202727	0.00123141	-0.00686804	0.0139528	0.0300041	0.0012439	0.00855954	-0.00545217	-0.000633034	-0.00710792	-0.00199623	0.0233734	0.00740526	0.0129972	-0.00592885	0.0230079	0.0320716	0.00243092	0.037896	0.00409129	-0.00514924	0.0109392	-0.0036264	0.0125485	0.0317184	0.00192902	0.0015285	0.00384843	-0.00599487	0.0318892	0.00575943	-0.000569584	-0.00209316	0.0395741	0.000776592	0.0122279	0.00978568	0.00438831
pnt	0.0529035	0.0440741	0.0110821	0.0306296	0.153639	0.0243248	-0.000872486	-0.00104871	0.0115623	0.00712988	-0.00142532	-0.00342167	0.0175859	0.0416736	-0.0025814	0.0253133	-0.00300893	-0.0024804	0.0561912	0.0236864	0.0213431	-1.43269e-05	0.0460097	0.0153816	0.0247387	-0.00583876	0.0265804	0.00782859	0.0272466	0.0668689	0.0201612	0.00866803	0.00124791	0.0449333	0.0295358	0.0333492	0.000710342	0.0240831	0.0204404	-0.00278024	0.000841355	-0.0027879	0.0248252	-0.000650246	0.0277743	0.0221606	0.0731617	-0.00119937	0.0442398
prd	0.0260351	0.0524803	0.00397536	0.103421	0.11223	0.00873296	0.0127119	0.0184949	0.05828	0.0219707	0.088233	-0.0094147	-7.4551e-05	0.103698	-0.00400688	-0.000159135	0.00752014	0.0255698	0.0412275	0.0226389	0.0226044	0.0134228	0.126818	0.00736202	0.03476	-0.00566849	0.0378803	-0.00419756	0.0928111	0.207578	0.0416869	0.0352802	0.0422323	0.00294205	0.0587898	0.152251	0.0268506	0.091697	0.0530497	-0.00759665	0.00237569	-0.000370604	0.0323054	0.00429007	0.0355174	0.033543	0.0426114	-0.00221096	0.034863
prg	-0.00201566	0.0310334	-0.00300164	-0.00150829	-0.00105782	-0.00181792	-0.000425465	-0.000511398	-0.00234848	-0.00360051	-0.000695052	0.0139602	-0.00125881	-0.00637688	-0.00125881	-0.000480972	0.0162766	-0.00120956	-0.00129454	0.0557481	0.023041	-0.00250639	-0.00155152	0.0112899	-0.000491323	0.00643623	-0.000459573	0.0103329	-0.0020334	0.000737587	0.0304537	-0.00200032	-0.00221268	-0.000549359	0.00233549	-0.00223346	-0.00233302	-0.00223355	0.0105696	0.075396	0.0216018	-0.00135951	-0.00329224	-0.00031709	-0.00125478	-0.00104339	-0.000511398	-0.000584867	-0.00160633
pros	0.0331786	0.0247617	0.0748573	-0.0103983	0.00872154	0.0113417	0.00446511	-0.00227398	0.00356701	0.10407	-0.00234883	0.00151668	-0.00836987	0.12278	-0.0057001	0.00562789	-0.00237801	-3.68436e-05	0.0244053	-0.015015	0.0125994	0.0707461	-0.00506225	0.0825546	0.0153812	0.0480822	0.00300131	-0.0017552	0.0139924	0.108358	-0.0156003	-0.0184525	-0.00141428	0.0027166	-0.0323361	0.0466737	-0.0264323	0.00699756	0.00103568	-0.0134699	0.0689148	-0.00861402	0.0388181	-0.000191699	0.0118293	0.0189922	0.0206488	0.00136477	0.0310162
psq	-0.00324624	0.00934382	0.0240786	0.012563	-0.00475625	-0.00817385	-0.001913	-0.00229938	0.00447306	0.00379225	0.0135894	0.00300328	-0.00103241	0.00650388	0.00359512	-0.00216258	-0.00262152	0.00419042	0.00318114	-0.00756688	0.000562538	0.0216605	-0.0032136	0.00301982	-0.00220912	0.0100793	-0.00206636	0.0239775	0.00815819	0.0170946	-0.00371362	-0.000203474	0.00598113	-0.00247006	-0.00415569	0.000649262	0.0273333	0.0162654	0.0133471	-0.00609592	0.0215949	0.0410515	0.00693353	-0.00142572	0.0129273	0.000884499	0.00905268	-0.00262972	0.00368449
pzg	-0.0119742	0.0969399	0.0314298	0.0215989	0.0195137	-0.0062061	0.00263129	0.0117792	0.0291262	-0.0129395	0.00157998	0.0354752	-0.000619528	-0.0382626	0.0197022	0.0248951	-0.00418194	0.0261434	-0.00126658	0.147311	0.000360203	0.00612786	0.0165308	0.0407912	0.0702989	0.00960182	0.014141	0.329573	-0.00516789	0.061377	0.00040644	-0.0060569	0.00756681	0.00511649	-0.000306422	-0.00420745	0.0332942	0.0122445	-0.00439062	0.188566	0.341778	0.223548	0.011277	0.00592982	0.0787353	0.00101147	0.000700905	0.00415537	0.00431672
ranshi	0.0415476	0.0324346	0.0147135	0.136945	0.082733	0.00511251	0.00998369	0.0176116	0.083964	0.0351027	0.0634042	0.00712971	-0.00637448	0.0464011	0.00186033	-0.00243559	0.02087	0.0581308	0.0615245	0.0209322	0.00897213	0.012422	0.112659	0.00323416	0.0185376	0.0244488	0.0426257	0.00669685	0.043581	0.0660786	0.0557244	0.0289779	0.0407661	0.00662178	0.0359223	0.0918816	0.0195959	0.0893436	0.0449552	-0.00304008	-0.00324936	0.00456059	0.0735825	-0.00160571	0.0266902	0.0592118	-0.00258967	-0.0029617	0.0242145
repo	0.0285116	0.00978277	0.0167231	0.0292679	0.0133089	-0.00296962	-0.000695007	0.0301998	0.0372607	0.0168793	-0.00113538	-0.00272564	0.023246	0.00332138	-0.0020563	0.0322102	0.00847254	0.0111863	0.0101902	0.0176273	0.0130149	0.0216276	0.0180376	0.00490262	0.031499	0.00103574	-0.000750722	0.0041801	0.0045615	0.0126891	-0.00265487	0.00474316	0.0181608	-0.000897389	0.00514189	0.00258954	-0.00381105	0.0107361	0.0121036	-0.00221469	0.0049973	-0.00222079	0.0243343	-0.000517974	-0.00204971	-0.0017044	-0.000835381	-0.000955393	-0.00262397
rib	0.00799484	0.0145202	0.13445	0.0382395	0.00630254	0.00638868	-0.00252407	-0.00303387	0.0758292	0.0256028	-0.00412339	0.0701833	0.00311453	0.0112004	0.0489717	0.0155469	0.00947937	0.025854	-0.00424893	-0.00746909	0.00185075	0.0442993	-0.000600297	0.0200134	0.00609178	0.132158	0.00690162	0.0215012	-0.00546908	0.00655315	0.00953517	-0.00516608	0.0131832	-0.00325906	0.00527246	-0.00112452	0.00153632	0.0228468	0.0114634	0.00506616	0.0478092	0.0115451	0.0467454	-0.00188113	0.0102496	-0.00193954	-0.00303387	0.00409828	0.0181843
ro	-0.00271224	0.00235655	-0.00991381	0.0842359	-0.00349377	-0.00600423	-0.00140523	-0.00168905	-0.00775656	-0.00285719	0.0203771	-0.00551094	-0.0041576	-0.0142451	-0.0041576	-0.00158855	0.12998	-0.00399493	0.00182967	0.0242683	0.00377396	0.0268184	0.0510154	0.00154869	-0.00162274	-0.0094039	-0.00151788	-0.0069537	0.0558657	-0.0110114	0.165258	0.0649375	0.0539158	-0.00181442	0.0356265	-0.00852626	0.0983266	-0.000239772	0.0507895	-0.00447785	-0.00993983	-0.00449019	-0.0059595	-0.00104728	-0.00414428	-0.0034461	-0.00168905	-0.0019317	-0.000373732
row	0.0363637	0.0873546	0.0287293	0.0932978	0.0828251	0.0206353	0.0230868	0.00966816	0.0927767	0.0224056	0.0646275	0.0131186	-0.00676316	0.134266	0.00621573	-2.07349e-05	0.00548531	0.0575483	0.0484262	0.112791	0.0403712	0.00907046	0.149198	0.025562	0.0364792	0.0324863	0.0282176	0.0494906	0.0417946	0.24893	0.0081107	0.0133727	0.0273523	-0.00202847	0.02229	0.301528	0.00741577	0.13222	0.059317	0.11942	0.0724435	0.032126	0.0499743	0.0121366	0.056996	0.0409781	-0.000944923	0.0124851	0.0393886
run	0.0409117	0.0457986	0.0187746	0.00108513	0.0075672	0.0501825	0.00874671	-0.00283589	0.0134925	0.111523	0.0165568	0.022107	-0.00321327	0.0652764	0.0193905	0.00715848	0.0015735	0.00897046	0.0221347	0.000159394	0.0160259	0.020569	-0.00247771	0.0374476	-0.00272457	0.0485614	-0.0025485	-0.000330673	-0.00658105	0.0498472	-0.000235129	0.00322026	0.000698495	0.0141617	-0.00767316	0.0470034	-0.00472627	0.0111734	0.00926819	0.00648228	0.00614079	-0.007539	0.0672722	-0.00175838	0.008159	0.0713826	0.00640588	0.00483923	0.0354894
salm	0.131399	0.0467802	0.0200513	0.00406553	0.00103214	0.10699	0.00694804	0.00477551	0.0506829	0.145733	0.0133249	0.0737155	0.0116288	0.104533	0.0673841	0.0140324	0.00752426	0.0195631	0.0491411	-0.00524652	0.0160947	0.00564448	0.00874487	0.0758442	0.0052322	0.0953115	-0.00293876	0.00628952	0.00334646	0.0518159	-0.0103927	0.00174596	0.0046679	0.0339396	-0.00701066	0.0458297	-0.00598302	0.0248732	0.0208829	-0.00257529	0.0172066	-0.00261578	0.109894	-0.00202765	0.0117173	0.064461	0.0369582	0.0314424	0.0902211
sc	0.118334	0.00478591	0.00128143	-0.00335265	0.0197691	0.138341	-0.000945728	-0.00113674	0.0048559	0.0154348	-0.00154497	0.0103747	0.0065073	0.068686	0.0065073	-0.00106911	0.00473335	-0.00268862	0.0876293	0.0263386	-0.00239345	-0.000841376	0.00411705	0.097198	-0.00109212	0.00203681	-0.00102154	-0.0046799	0.0302701	0.0854345	-0.00361261	0.00733808	0.00575934	0.0412837	0.00538654	0.0561247	-0.00518587	0.00561568	0.00109216	0.0229229	-0.00932815	-0.00302194	0.0400334	-0.000704831	0.025216	0.0649548	0.113001	0.0186642	0.106092
schlank	0.101032	0.00260671	0.0197945	-0.0038791	0.00684484	0.062491	-0.00109423	-0.00131524	0.137746	0.0254891	0.0127466	0.141871	0.012858	0.013313	0.109431	0.0197527	0.010055	0.055499	0.0984275	0.0077476	0.00662877	0.0221881	-0.00399026	0.0207674	-0.00126361	0.0939681	-0.00118195	-0.000567895	-0.000214931	0.00715686	0.0145706	-0.00514452	0.0220131	-0.00141286	0.0146155	0.0136431	0.00715547	0.0354327	0.0340795	-0.00348684	-0.00325321	-0.00349645	0.111238	0.0310115	0.00484629	0.0845892	-0.00131524	0.119358	0.103356
scro	-0.00468077	0.00194328	0.0769379	-0.00394271	0.00477681	0.00564952	-0.00210543	-0.00253067	0.00661987	0.0306756	0.00416648	0.0108654	0.0822127	0.0178364	0.00219378	-0.0023801	0.00721262	0.00277775	0.00178641	0.0030062	-0.000410261	0.0239886	-0.00767773	0.0091726	0.00832178	0.04649	-0.00227421	0.278736	-0.00743809	0.0148133	-0.00477175	-0.00989866	0.00354832	-0.00271852	-0.00602204	0.000279934	0.0114036	0.00331299	-0.0076704	0.00111663	0.206766	0.231307	0.0166786	-0.00156913	0.0233653	0.0252843	-0.00253067	0.0151769	-0.00133134
scrt	0.0388414	0.0241151	0.0966881	0.0334449	0.0279462	0.0449072	0.0042942	-0.00260694	0.0717093	0.00517222	0.00903361	0.0529278	-0.00983449	0.0236217	0.089079	-0.00194732	0.00232594	0.0939926	0.041692	-0.0136997	0.0171762	0.0301257	0.0450414	0.00746238	0.00638574	0.0620631	0.0168409	-0.000402681	0.0046211	0.0115788	0.0072893	0.00131689	0.00747694	0.00426834	0.011769	0.165551	-0.00964433	0.0478535	0.022042	-0.0115841	-0.00016861	-0.0069901	0.136549	0.0356146	0.0491043	0.0327516	-0.00260694	0.035477	0.0579225
sd	0.0588268	0.0554912	0.084021	0.0191503	0.0125294	0.0696304	0.00485446	0.0235534	0.0844751	0.149121	0.00862918	0.102391	-0.00175935	0.144665	0.0667273	0.0142339	-0.00453448	0.0388937	0.0408633	-0.0182538	0.019666	0.0317441	0.0102571	0.0499958	-0.00427345	0.210647	-3.69009e-05	0.00382582	-0.0197959	0.0328902	-0.0103047	-0.0209511	0.00400856	0.0310118	-0.0159343	0.0793666	-0.0263012	0.0539344	0.0102878	-0.0184429	0.0281455	0.00726595	0.140655	0.00718845	0.0275143	0.0356823	0.0178582	0.025213	0.0514633
sens	0.0692886	0.00581597	-0.00379725	-0.00190808	0.0180703	0.0658417	0.0476004	-0.000646949	0.0147107	0.0365743	-0.000879281	-0.00211084	0.0147367	0.0415831	-0.00159247	-0.000608458	0.0121732	-0.00153016	-0.00163767	0.024659	-0.00136218	0.00512923	-0.00196276	0.007991	-0.000621552	-0.00360194	-0.000581386	-0.00266345	0.0177775	0.0783089	-0.00205603	-0.00253053	-0.00279917	-0.000694971	0.0050096	0.0227093	-0.00295141	-0.00282557	0.017369	-0.00171513	0.00488998	-0.00171986	0.00222686	-0.000401138	-0.00158737	0.038031	-0.000646949	-0.000739891	0.0621135
sens-2	0.0184567	0.0130974	0.017813	0.0376645	0.00113348	0.0188686	-0.00184124	0.00957463	0.0236571	0.0189984	0.0230262	0.0291418	-0.000642476	0.02354	0.0233832	-0.00208145	0.0390626	-0.000235231	0.0224394	0.0199078	0.0121743	0.0233471	0.032354	0.0284932	-0.00212624	0.0373572	-0.00198884	-0.00621733	0.0361126	0.0351212	0.0526761	0.00351394	0.0152364	0.00859697	0.0152473	0.0110489	0.0134685	0.0176519	0.0233892	-0.00586723	0.00584859	-0.00588341	0.0534642	-0.00137224	-0.000609715	0.0475933	0.00957463	-0.00253106	0.02325
seq	0.0308822	0.0126531	0.138675	0.0334036	0.0288687	0.0294382	0.00510812	-0.00383304	0.0677295	0.0337757	0.0252877	0.0194412	-0.00380615	0.0114958	0.0102661	0.00373551	0.00351081	0.0202155	0.0532577	0.00360639	0.0116495	0.154312	0.0524435	0.0304019	0.0106895	0.0216734	0.0042373	0.0282907	0.000542772	0.028522	0.00530489	0.00461049	0.0253992	0.021594	0.013963	0.0332182	-0.00061694	0.0616615	0.0258206	0.00552738	0.0687436	0.0028489	0.114134	0.0198844	0.0244763	0.0362654	0.0237841	0.0258076	0.018917
shn	0.0187137	0.00222525	0.0199517	0.00722171	0.040216	0.00502081	-0.00074537	0.0280468	0.0150488	0.0106733	0.0627043	0.00600506	-0.0022053	0.0195769	0.00959285	-0.000842612	0.00756601	-0.00211902	-0.0022679	-0.00396119	0.0118914	0.0135998	0.0260595	0.0116975	-0.000860745	0.00561866	-0.000805122	0.00341717	-0.0035623	0.0203558	0.0246413	0.0114369	0.00966171	-0.000962417	0.000132007	0.0083868	-0.00408721	0.0162092	-0.00362807	-0.00237517	0.00738587	-0.00238172	0.0265595	-0.000555508	0.0451448	0.012388	-0.000895915	-0.00102462	0.0157245
sim	0.0410241	0.00753448	0.0200261	0.00682148	0.0129981	0.0276793	-0.00129256	-0.00155362	0.011327	0.0234165	-0.00211156	0.00525263	0.00299554	0.0309864	0.00299554	-0.00146119	0.00140171	0.0105159	0.035866	0.00845529	-0.00327122	0.0166507	0.0119211	0.0509398	0.0333328	0.00054675	0.0172181	-0.00228886	0.0193197	0.0352994	0.00565552	0.0155146	0.0128418	0.0139067	0.00452035	0.0044557	0.000344517	0.0242316	0.0229274	0.00221734	0.00854847	0.00218873	0.022032	-0.000963317	0.00302953	0.0214823	0.0486365	-0.00177682	0.0594164
sima	0.0397663	-0.00149208	-0.00189818	-0.000953818	-0.000668948	0.0442675	-0.000269056	-0.000323399	0.0161924	0.02122	-0.000439538	-0.00105517	-0.000796049	0.00305861	0.0318546	-0.000304158	-0.000927889	-0.000764903	-0.000818644	-0.00142987	-0.00068093	-0.00158499	-0.000981152	-0.00124701	-0.000310704	-0.00180055	0.0888276	-0.00133142	-0.00128589	-0.00309025	-0.00102778	-0.00126497	0.0360666	-0.000347404	0.00764067	0.0027274	-0.00147536	-0.00141246	-0.00130962	0.0294779	-0.00265383	-0.000859731	0.0362595	-0.000200522	-0.0007935	0.038682	-0.000323399	-0.000369859	0.0246365
sisA	0.0396273	0.0294969	-0.00868998	0.135313	0.0769308	0.00972385	0.0057026	0.00362653	0.0522255	0.0159452	0.0645651	-0.00514265	-6.8732e-05	0.0581796	-0.0059898	-0.00341978	0.0150032	0.0222011	0.0368676	0.0188488	0.00617311	0.000236956	0.147835	-0.000713107	0.0116246	-0.00826732	0.0290548	-0.00962062	0.0593323	0.0942529	0.0528234	0.0757592	0.0488132	0.00285549	0.0598261	0.097606	0.0608453	0.0615416	0.0215158	-0.00688917	-0.0178191	-0.00418014	0.0333751	0.00945369	0.026718	0.0246865	0.00362653	0.00219317	0.00486053
slbo	0.0285317	0.0671365	0.0369144	0.14224	0.0927928	0.00764003	0.00749208	0.0045684	0.118346	0.00141403	0.0771588	0.0254471	0.0151581	0.0301451	0.0131234	0.00552126	0.031665	0.0655194	0.0436855	0.0194953	0.0266174	0.0117294	0.182094	0.00264008	-6.85753e-06	0.0558287	0.0395635	0.0034427	0.0342569	0.0441223	0.0633845	0.02778	0.0711318	-0.00581651	0.0852468	0.154591	0.0418217	0.124417	0.0428328	0.000768757	4.73317e-05	-0.00685313	0.0782389	0.0127365	0.0663218	0.0306317	-0.000423096	0.00253832	0.0181616
slou	0.0169351	0.0725817	0.00844818	0.0063539	0.0241415	0.0271621	-0.000800147	0.0260044	0.0610494	0.0011394	0.0185451	0.0218175	0.00862508	0.0190435	0.03061	-0.000904536	-0.00275945	0.0320347	0.0510232	0.0266235	0.0108118	-0.00471362	0.0328319	0.0104089	-0.000924003	0.0193513	0.0591422	0.00266086	-0.0038241	0.0207455	0.00548062	-0.00376189	0.0084523	-0.00103315	0.0129233	0.036373	-0.00438758	0.0332955	0.0162894	0.0383019	0.00240628	-0.00255675	0.0282307	-0.000596333	0.00866769	-0.00196224	0.0260044	0.0460675	0.022888
slp1	0.00270287	-0.00598047	0.0144034	-0.00112847	0.00250986	-0.00688428	-0.00161119	-0.00193661	0.00594651	-0.00574465	0.00726822	0.00197817	0.0610162	-0.0158144	0.000714948	0.0124763	-0.00555648	-0.00458047	0.000429592	0.00375568	0.00232412	0.00722707	0.00303877	0.00309305	0.026133	-0.000925541	-0.00174035	0.454247	-0.000868533	0.015831	-0.00189716	-0.000632659	0.00734675	-0.00208036	-0.00541393	-0.0122421	0.0240233	-0.00534168	-0.00448716	-4.09964e-05	0.270004	0.451989	0.000407422	-0.00120079	0.00624709	-0.0039512	-0.00193661	-0.00221483	-0.006083
slp2	-0.0015612	0.0125414	-0.00232488	-0.00116823	-0.000819322	-0.00140805	-0.000329538	-0.000396097	-0.00181898	-0.00278872	0.0957577	-0.00129237	-0.000974995	0.0124314	-0.000974995	-0.00037253	-0.00113647	-0.000936848	-0.00100267	0.0132254	-0.000833997	-0.00194129	0.0204745	-0.00152732	-0.000380548	-0.0022053	-0.000355956	-0.00163071	-0.00157494	0.0252564	0.0194465	-0.00154932	-0.0017138	-0.000425498	-0.00322394	0.0174249	-0.00180701	0.0134267	-0.00160402	-0.0010501	0.00507534	-0.00105299	-0.00254996	-0.000245598	0.0525185	0.0313155	0.0650056	-0.000453001	-0.00124416
sna	0.0030705	0.00398826	0.061792	0.0308944	-0.00527805	-0.0061651	-0.00212287	0.00769657	0.00863826	0.0105956	0.00407664	-0.00200267	0.0939806	0.000845191	0.0146069	-0.00239983	-0.000142688	-0.00168883	-0.00645916	0.00514581	0.00926294	0.0384563	0.00244838	0.0143042	0.0402141	0.00832773	-0.00229306	0.359346	-0.00493954	0.0154361	0.008113	0.00589079	0.0057375	-0.00274105	-0.00893905	-0.000256153	0.0179519	0.00548055	-0.0052192	0.00876055	0.259553	0.337713	0.00646642	-0.00158213	0.00631186	0.00486131	-0.00255164	-0.00291822	-0.00145057
so	0.0567887	0.0112225	0.0560296	0.0394245	0.0203568	0.058686	0.00688743	0.00472001	0.0820959	0.0508472	0.0073219	0.0386741	0.00170139	0.0483325	0.0343395	0.0394713	0.0130033	0.0431613	0.0424719	0.00563695	0.00832564	0.0253662	0.0324872	0.0187643	0.00517575	0.10934	0.0148632	0.0159543	0.0133703	0.0210355	0.00729852	-0.00045562	0.0307214	0.0262861	0.0153519	0.04588	0.00456924	0.0672882	0.0306389	-0.00568085	0.0239926	0.00940737	0.0938217	0.0237774	0.0017585	0.0601497	0.0127267	0.0242505	0.0640395
sob	0.0638772	0.0471023	0.0837545	0.0982644	0.0523435	0.0447746	0.00571043	-0.00363363	0.174181	0.0330457	0.0485636	0.0621255	0.0147557	0.0286823	0.0414181	0.0352155	0.0201176	0.0407202	0.0484299	0.0172187	-0.00419119	0.0379062	0.111818	0.00881693	-0.00349099	0.0863026	0.0209924	0.0171561	0.0113957	0.0265932	0.0344676	0.00829743	0.0709625	0.0299265	0.0627017	0.06205	0.0173227	0.0784456	0.0306159	-0.00412835	0.0312426	0.0122995	0.120399	0.00946296	0.0386353	0.0496998	0.0109013	0.0276236	0.0630666
sqz	0.0476999	0.0394957	0.0727179	0.0114599	0.00729404	0.05437	0.0151122	0.0105895	0.01832	0.0958047	0.00377525	0.0433473	0.00148185	0.135673	0.0188511	-0.00154018	-0.00210329	0.0136476	0.04279	-0.000240646	0.0087221	0.0487075	-0.00122288	0.0766092	0.00266867	0.0491681	0.00368143	-0.000419956	-0.00293511	0.0792835	-0.00972048	-0.0131479	0.00296653	0.024802	-0.0224768	0.0741921	-0.0161947	0.0182211	0.00894515	0.000640079	0.0235173	-0.00428349	0.0570323	0.0234746	0.00507301	0.0245031	0.0191114	0.0224302	0.0493227
sr	0.0267135	0.0213983	0.0765821	0.00883667	0.00771612	0.0199881	0.0086563	0.0109983	0.0346795	0.071948	0.0167633	0.0165512	0.00722014	0.051275	0.00504226	0.00662994	0.00615147	0.00849633	0.0232783	-0.000216338	0.0148427	0.0340198	0.0236965	0.0155682	-0.00483231	0.0865366	-0.00452003	0.00683762	0.0057852	0.0219237	0.00262085	-0.00174624	0.0257198	0.019467	0.0207319	0.0312966	-0.00514507	0.0300346	0.0196215	-0.00928758	0.0158566	0.00882597	0.0451964	0.00549435	0.0116919	0.0107315	0.0109983	-0.00107982	0.0167116
ssp	0.00862654	0.0870886	-0.008989	0.0802953	0.00432909	-0.00760225	0.0065484	0.00440881	0.00854232	-0.0078085	0.0412837	0.00338634	-0.00514725	-0.0131953	-0.00514725	0.0133842	0.00939672	0.00521793	0.00688386	0.452425	-0.00711915	-0.0052727	0.0465425	0.0257055	0.00485941	-0.0145426	0.0056288	0.0185921	0.0182151	0.0117948	0.0237813	0.0370429	0.0327399	0.0108727	0.0104458	0.00469334	0.0624396	0.0141175	-8.70759e-05	0.342121	0.0188627	0.0145496	-0.00187919	-0.00209647	0.0140032	0.0122327	-0.00338115	0.00294593	0.00185384
stc	0.0619389	0.0203415	0.028662	0.0563058	0.0149273	0.0587933	-0.00209372	0.0182598	0.103077	0.0599914	0.088352	0.00781168	0.0149785	0.0596694	0.0149785	0.0307667	0.0109707	0.0248876	0.0306981	0.0126618	0.019427	0.0178	0.0956544	0.0283653	0.00839431	0.0411903	0.032413	0.0125926	0.0242962	0.0612902	0.00844599	0.00892608	0.030414	0.0359822	0.0248164	0.0713356	0.00467134	0.116603	0.0701563	0.00513122	0.0176993	0.00115707	0.103144	-0.0015604	0.00656961	0.0662996	0.0182598	-0.00287814	0.0719426
stwl	-0.0048919	0.0714509	0.00475454	0.00968471	0.0117114	0.00322582	0.00111028	0.0136506	0.0135148	-0.0106327	-0.00409946	0.0143479	-0.00795661	-0.00104219	0.00579519	0.0152033	0.00242243	0.0153063	0.0125074	0.0214736	-0.00267062	0.0273439	0.00688838	0.0363332	0.054786	-0.0136657	0.0056677	0.196905	0.0106789	0.0821238	-0.00262463	-0.0120572	0.00383295	0.00292918	-0.00747504	0.0424024	0.00644499	0.0100478	-0.0035471	0.0161118	0.25874	0.136123	-0.00777095	-0.00348883	0.0551722	0.0121913	0.0136506	0.014639	0.0178257
su(Hw)	0.0153692	0.0255063	0.0228221	0.00990791	0.00607328	0.0137555	-0.00484281	0.0175452	0.0351517	-0.016306	0.00585017	0.0184891	0.000911594	0.000232904	0.0256764	0.00446232	0.00130234	0.0179433	0.0186162	-0.0161053	0.0188884	0.00439304	0.0257079	0.00813649	-0.000728512	0.0258203	0.0155672	0.00357081	-0.00177855	0.0310144	0.00369301	-0.00708732	0.00978913	-0.00625302	0.00356786	0.0348004	-0.00164276	0.0200631	0.00907478	-0.0136621	0.0152934	-0.00135392	0.0363477	0.00392454	0.033494	0.00878209	-0.00114771	0.013778	0.00715946
sug	0.0505572	0.0343384	0.0836895	0.0162429	0.0145296	0.0575087	-0.00148491	0.0156381	0.120057	0.0197834	-0.00711843	0.163738	0.014748	0.0236428	0.120762	0.0215888	0.00715741	0.0573245	0.020923	-0.00866989	0.0319462	0.0133087	0.0171197	0.021872	0.000938975	0.266955	0.0104527	0.0243675	-0.0144906	0.0104004	0.00219793	-0.0177306	0.00236521	0.00639084	-0.00749643	0.0249633	-0.0172039	0.0540505	0.0209747	-0.00634117	0.0383683	0.0051261	0.165313	0.0201304	0.0399339	0.0470784	0.0118135	0.0418129	0.0664565
tap	0.0603974	0.0289314	0.0047124	0.0123453	0.0152713	0.0721875	-0.00163001	-0.00195923	0.0174096	0.034956	0.0169117	0.0264161	0.00601602	0.0626672	0.0331127	0.0122917	0.00369083	0.0235573	0.0108535	0.00655942	0.0148607	0.00692533	0.0204932	0.0168052	-0.00188232	0.0134522	0.0721983	0.00172558	-0.00103648	0.0727806	-0.00622652	-0.00423195	0.0195065	0.0102725	-0.00230602	0.0651944	-7.91044e-05	0.0284145	0.00533383	-0.000159116	0.00930857	0.00985549	0.0722389	0.0202175	0.00606601	0.054772	-0.00195923	0.0210131	0.0662277
term	-0.00104073	-0.00121825	-0.00154982	0.0660863	0.0469825	-0.000938637	-0.000219678	-0.000264047	-0.00121258	-0.00185903	-0.000358872	-0.000861522	-0.000649955	0.00539219	-0.000649955	-0.000248337	0.0335984	-0.000624525	-0.000668403	0.0212962	-0.000555962	0.0190313	-0.000801086	0.0246596	-0.000253682	-0.00147011	-0.000237289	0.0229961	0.0238671	-0.00252311	-0.000839153	-0.00103282	-0.00114246	-0.000283647	-0.00214916	-0.00340655	0.0205847	-0.00115324	-0.00106928	-0.000700019	0.010321	0.0363489	-0.00169986	-0.000163721	-0.000647873	-0.000538727	-0.000264047	-0.000301981	-0.000829387
tgo	0.0364804	0.0544009	0.00953538	0.137832	0.0239197	0.0188069	0.012296	-0.00221711	0.0988903	0.0258127	0.083613	-0.00360408	0.0089324	0.0671531	-0.000660827	-0.0020852	0.00600195	0.0496502	0.0643674	0.00905922	0.000933209	0.0013242	0.168769	-0.00238885	0.0101169	0.0307784	0.0765601	-0.00912773	0.00911744	0.0859271	0.0413818	0.0156257	0.0592071	-0.00238168	0.0347749	0.126479	0.0290906	0.121209	0.0291873	0.0030351	-0.00770818	-0.00589402	0.0326654	-0.00137471	0.0571147	0.0417131	-0.00221711	0.00775524	0.0344894
tin	0.0418113	0.02194	0.00463003	0.0210511	0.0597771	0.0212038	0.0210414	0.0355592	0.0220994	0.00908171	0.0661223	-0.00458553	-0.00345944	0.0724712	-0.00345944	0.0183282	0.0283327	0.0201912	0.0330817	0.0318775	0.00583907	0.000771017	0.0508667	0.00909464	0.0563593	-0.00782477	0.0604287	-0.0012485	0.0789147	0.115831	0.00723603	-0.00549725	0.0241773	-0.00150974	0.0241178	0.0933144	0.00179909	0.0495436	0.0265879	-0.00372591	-0.0021216	-0.00373618	0.017494	-0.000871421	0.0267841	0.0334448	0.0170769	-0.00160732	0.0192624
tio	0.0613601	0.0333388	0.009064	0.0398477	0.0284067	0.0399969	0.0510335	0.0148558	0.0473672	0.0171144	0.0549728	0.00685975	2.81743e-06	0.076733	0.0181456	-0.00277176	0.00713191	0.0232306	0.0843	0.0277376	0.00226955	0.00215541	0.0677645	0.0119366	0.00643325	0.01132	0.0369674	-0.00557698	0.0335021	0.0904181	0.0131786	-0.00233705	0.0205582	0.0465574	0.00112916	0.109967	-0.00355879	0.0469519	0.021379	0.0360131	-0.00718657	-0.00111051	0.030739	0.0555733	0.0546511	0.0202201	0.0415601	0.0199842	0.036356
tll	0.017555	0.0237928	0.0328779	-0.000521839	-0.000167554	0.00788106	0.017017	0.00424277	-0.00460127	0.0163552	-0.00706202	-0.0024197	-0.00695343	0.0245086	-0.00695343	0.00948545	-0.0060837	-0.00255344	0.0318179	0.0135512	0.00295801	0.0868546	-0.00934839	0.0362672	0.016987	-0.0144774	0.0148213	0.00963623	0.0256848	0.0753943	-0.00975176	-0.00764702	0.0053367	0.00648248	-0.0149001	-0.0005981	-0.00846	0.0073738	-0.00359888	0.0156105	0.0434263	-0.000489699	0.00523514	0.00786819	0.00884005	0.00778598	0.0311194	0.0084685	0.0373997
toy	0.00323806	0.000960262	0.0128761	0.0618114	-0.00304573	0.00477147	-0.00122502	-0.00147244	0.0360775	0.0129277	0.0239804	0.00608262	-0.00362443	0.00194864	0.010762	-0.00138484	0.00813557	0.0189687	-0.0037273	0.0015715	0.00529984	0.0183771	0.0189266	0.00356042	-0.00141464	0.0144359	0.0379436	-0.00606196	0.0300028	-0.00819322	0.0679448	0.0352333	0.0390262	-0.00158174	0.0219633	-0.00227588	0.0324784	0.0221949	0.0292586	0.00277947	-0.00534384	-0.00391437	0.0271241	-0.000912981	-0.00361282	-0.00300417	-0.00147244	-0.00168398	0.0179805
trem	0.00821009	0.0683961	-0.000992048	0.0148648	0.0233126	0.00657731	0.0184305	0.0144096	0.00538889	-0.00460317	0.00873122	0.0170416	0.00323639	0.0248982	-0.00386578	0.0249513	-0.0025433	0.018735	-0.000719615	0.0604879	-0.00634428	0.00869725	0.0139563	0.038548	0.0696399	-0.0151797	0.0166772	0.167245	0.0256357	0.133674	-0.00130218	-0.000543036	0.00529947	0.0129837	-0.00106193	0.030164	0.0230187	0.0151036	-0.00133451	0.0612962	0.22701	0.11044	-0.0054977	0.0121755	0.0496053	0.00668881	0.0144096	-0.00344601	0.0268048
trh	-0.00073589	-0.00086141	-0.00109586	0.0467289	-0.000386197	-0.0006637	-0.000155332	-0.000186705	-0.0008574	0.0190334	-0.000253754	-0.000609172	-0.000459575	-0.00232812	-0.000459575	0.147314	-0.000535689	-0.000441594	-0.00047262	-0.000825495	-0.000393114	-0.00091505	-0.000566439	-0.000719922	-0.000179376	-0.00103949	-0.000167784	-0.000768653	-0.000742369	-0.00178406	0.0433252	-0.000730292	0.0316369	-0.000200564	-0.00151964	0.00954122	-0.000851757	-0.000815441	-0.000756073	-0.000494976	-0.00153211	-0.00049634	0.0209334	-0.000115765	-0.000458104	0.0677575	-0.000186705	-0.000213527	-0.00058645
ttk	0.0261784	0.0349826	0.021399	0.100609	0.0915296	0.0183222	0.0086023	0.00627607	0.0473708	0.0267523	0.0903397	-0.000893448	-0.00333048	0.0443859	0.000396667	0.00702431	0.0430092	0.00872932	0.0108677	0.0166359	-0.00168448	0.0333096	0.136759	0.0104844	-0.00275464	0.0125182	0.0279425	-0.000580455	0.0234362	0.0446679	0.0632538	0.045426	0.0517465	-0.00308002	0.0564049	0.0772131	0.0437856	0.0574019	0.06367	-0.00413842	0.000914634	0.002738	0.0471932	-0.00177779	0.0116601	0.0480415	0.00627607	-0.0032791	0.0232049
tup	0.0142503	0.0117053	0.0083583	-0.00123144	-0.000863653	-0.00148423	-0.000347368	-0.000417528	0.0117763	-0.00293961	-0.000567471	-0.00136229	-0.00102775	0.0222593	-0.00102775	-0.000392687	-0.00119796	-0.000987537	0.0235432	-0.00184605	-0.000879122	-0.00204632	-0.00126673	-0.00160996	-0.000401138	0.00904454	-0.000375215	-0.00171894	-0.00166016	0.00978599	0.0183161	-0.00163315	-0.00180653	-0.00044852	0.00455939	0.0159923	-0.00190478	-0.00182357	-0.00169081	-0.00110691	-0.00342625	-0.00110997	0.0171125	-0.000258886	-0.00102446	-0.000851868	-0.000417528	-0.000477511	-0.00131148
twi	0.028518	0.0334004	0.0267523	-8.93585e-05	0.010112	0.0147559	0.00928973	0.0180377	0.00653792	0.0290246	-0.0091067	0.00739103	0.00199456	0.0533325	0.00367526	0.0112323	-0.00478475	0.00688386	0.0320797	0.000587799	-0.00429452	0.0500266	0.00290224	0.0561863	0.0193102	0.0367329	0.00315336	-0.00227965	0.023627	0.0943391	-0.00693603	-0.00811677	-0.00777679	0.027349	-0.0154056	0.0247215	-0.014083	0.0146885	0.00681298	0.0103437	0.0363428	0.00398911	0.0180472	-0.00415458	0.0122227	0.012656	0.0221608	0.00676039	0.0528992
tx	0.0176217	-0.00161165	0.0108684	-0.00103025	-0.000722555	-0.00124175	-0.000290618	-0.000349315	0.0147623	-0.00245936	-0.000474762	0.021736	-0.000859843	-0.00435579	0.0595983	-0.000328532	-0.00100225	-0.0008262	-0.000884248	-0.00154446	-0.000735497	-0.00171201	0.0235181	-0.00134694	-0.000335603	-0.00194484	-0.000313915	-0.00143811	-0.00138893	0.00489434	-0.00111014	-0.00136634	0.0158322	-0.000375244	-0.00284318	0.00188131	0.0148782	0.0156599	-0.00141457	-0.000926075	0.016014	-0.000928627	0.00958379	-0.000216591	0.0294683	-0.000712697	-0.000349315	-0.000399499	-0.00109722
unc-4	-0.00588349	0.0147039	0.058952	0.0180185	-0.00566082	-0.00430255	0.00922249	0.00683232	0.0254463	0.00459275	-0.00371949	0.0146855	0.051774	-0.0163346	0.00886638	0.0177732	-0.00114938	0.00570196	0.000660256	0.00981269	-0.00120703	0.0103796	0.00121164	0.00948581	0.0471681	0.0022972	-0.00245935	0.446836	-0.00845094	0.019527	0.000390938	-0.00329471	0.00382489	0.00596889	-0.00386556	-0.00315973	0.0236484	0.0057881	-0.00392002	-7.12865e-06	0.324715	0.357759	0.0159727	-0.00169687	0.0167639	0.00381654	-0.00273669	0.00523887	0.00366235
unpg	0.181596	0.0642899	0.0208588	0.0517014	0.0664196	0.139127	0.0422258	-0.00555848	0.102461	0.0659398	0.0390844	0.0720612	0.00220986	0.2547	0.0637917	0.0154966	0.00965284	0.0736568	0.107654	0.0200618	0.0370127	0.0030494	0.0929657	0.0500015	0.0250922	0.0708495	0.0383814	-0.00613427	0.0422655	0.310426	0.00856246	0.00593118	0.0226792	0.0530094	0.0072594	0.301477	-0.00262658	0.133833	0.0759756	-0.00550796	-0.000946617	-0.00557371	0.177273	0.0279783	0.0381755	0.122701	0.0577934	0.0490483	0.102716
ush	0.00855314	0.0156856	0.0570324	0.00640023	0.00918072	0.00412378	-0.00356576	0.00812943	0.021419	0.0372037	0.00788499	0.0147401	0.0704258	0.0212997	0.014755	0.0223686	-0.00360072	0.00829184	0.00391801	0.0023732	0.00870623	0.0188673	-0.00271591	0.0175972	0.0217263	0.0637234	0.00305522	0.232295	0.00503338	0.0203776	0.000135962	0.000861063	0.00178157	0.00117525	-0.013388	-0.0162585	-0.00162747	0.00142152	-0.00651454	-0.00195838	0.239836	0.213691	0.0169813	-0.00265748	0.017408	0.015648	0.00192174	-0.00490168	0.0163591
usp	0.0152538	0.00076204	0.00708123	-0.00304344	-0.00213447	0.0177129	-0.000858503	-0.0010319	0.000809299	0.00748383	-0.00140248	0.0198972	-0.00254003	0.027193	-0.00254003	-0.000970505	-0.0029607	0.00822066	-0.00261212	-0.00456243	-0.00217271	0.0105685	-0.00313065	0.00918155	-0.000991391	0.00346738	-0.000927326	0.00192335	0.00228229	0.0180461	-0.00327942	-0.00403625	0.00141455	-0.0011085	-0.00839893	-0.00465104	-0.00470758	0.00131889	-0.00417874	-0.00273568	0.0267339	0.00675153	0.00539033	-0.000639824	-0.00253189	0.010242	-0.0010319	-0.00118014	0.0128606
vnd	0.000573257	0.0199589	0.019186	0.0264358	-0.00399496	0.00150602	-0.00302305	0.00363381	0.0137881	-0.00319724	0.000411683	0.00383732	0.106593	-0.0124958	0.00586823	0.0197623	0.0277534	0.00681653	0.00809031	0.00390493	0.00272793	0.0213424	0.00824531	0.00501227	0.00407301	0.0237144	-0.00326539	0.179518	0.0113957	0.00400371	0.0275653	0.00454571	0.00297487	-0.00390334	0.000251712	-0.00493476	0.025394	-0.0108174	0.0142969	-0.00137595	0.127459	0.176994	0.00791716	-0.00225301	0.00594409	-0.000274392	0.0109013	0.00220021	-0.00443091
vvl	0.0748162	0.073145	0.0737888	0.0619245	0.0395265	0.0490722	0.026591	0.0121648	0.0583959	0.22086	0.0301329	0.0374391	0.0217457	0.19276	0.00437775	0.0302889	0.0078245	0.0355325	0.0447331	0.0107333	0.00880638	0.051379	0.065445	0.0553688	0.0172692	0.0599763	0.0323139	0.0264553	0.0166217	0.101887	0.00776871	0.000824173	0.0440282	0.0139	0.00894466	0.0919317	-0.00790424	0.0636948	0.0268868	-0.0102908	0.0656513	0.0145026	0.0599393	0.00177887	0.0250961	0.027161	0.0237847	0.0019261	0.0456056
wdn	0.00933139	-0.000891355	0.0280833	0.0374395	0.0341895	0.00727036	-0.00139218	0.0138684	0.0712073	0.00189641	0.0549342	0.037689	0.00221642	0.00802907	0.0212227	-0.0015738	0.00608516	0.0224075	0.0265741	0.00683744	0.0112735	0.0175607	0.0464336	0.00168406	-0.00160767	0.0390965	0.0157884	-0.00307355	0.0130849	0.0150658	0.0291242	0.0295592	0.0327434	0.0271411	0.0282397	0.0346405	0.00272255	0.0359126	0.0164896	-0.00443628	0.00407471	0.00729172	0.0611438	-0.00103756	0.0213166	-0.00341411	0.0138684	0.0252708	0.00967629
wek	0.251057	0.0157907	0.0342364	0.0156175	-0.0048898	0.195172	0.0113086	0.00868296	0.0598479	0.0789561	0.00491973	0.0502185	0.00769055	0.064412	0.0887471	0.0682456	0.00482423	0.013149	0.0903733	0.0401421	0.0107988	0.0181699	0.0147958	0.0834174	0.0322219	0.0698307	0.0224577	0.0526456	0.00182446	0.0583492	-0.00401542	-0.000692316	0.0130244	0.120876	-0.00223893	0.0227912	-0.00587691	0.0511174	0.0152328	0.0104681	0.0509157	0.0229225	0.196302	0.0163432	0.00775224	0.163382	0.0970582	0.0649251	0.134092
wor	0.0170277	0.0177792	0.000270282	0.0472274	0.00780084	0.00774752	0.0245859	-0.00121848	0.00380733	0.00704419	0.0453917	-0.00397559	0.00568438	0.0225254	-0.00299929	-0.00114598	0.0487289	-0.00288194	0.0138075	0.0141253	0.0177158	0.0116835	0.109268	0.01203	-0.00117064	0.0010228	0.0226066	0.000213461	0.0113879	0.0214641	0.0635681	0.0227266	0.00469227	0.0185235	0.0256004	0.0301554	0.0322951	0.00948855	0.0163254	-0.00323032	-0.0018634	0.00480667	0.0125501	-0.000755511	-0.00298968	0.0289036	-0.00121848	-0.00139353	-0.0038273
z	0.0150537	0.00321945	0.108359	9.39949e-05	-0.00503324	0.0237315	-0.00413153	-0.00496599	0.0296949	0.0364058	0.00121081	0.00714556	0.00540682	0.0515139	0.0142221	0.00107737	0.00279277	0.0203544	0.0131513	-0.00710021	0.00755916	0.0764783	0.00822762	0.0261368	0.00648286	0.0565559	0.013583	0.0246831	0.00634597	0.0257675	0.0116031	-0.00965606	0.0113884	0.0147986	-0.0119905	0.0211569	-0.00944555	0.0234153	0.00551857	-0.00702277	0.0707429	0.0133439	0.0404927	-0.00307914	0.0121347	0.0217336	0.0166594	0.00377698	0.0121049
zen	0.0118785	0.0669199	0.0234614	0.00353315	0.0227198	0.00428209	0.00730992	0.0075355	0.0037713	0.019479	0.000891465	-0.00239372	-0.00463159	0.0446677	-0.00616126	0.0169077	-0.00304644	-0.00494707	0.025713	0.0279632	0.00212535	0.0667765	0.00841573	0.0310965	0.0279696	-0.0175491	0.026684	0.0152909	0.04272	0.145194	-0.00355844	-0.0040531	0.00978583	0.00594496	-0.00452755	0.024786	-0.00826014	0.0143149	0.00718136	0.0398741	0.0537893	0.00847595	-0.00261323	0.00746442	0.0200238	0.00318138	0.026298	0.020988	0.0462261
zen2	0.000343329	-0.00360209	0.0727939	0.0247188	0.00556285	-0.00650875	0.00737278	0.00516336	0.0112085	0.0094993	0.00183377	0.0025304	0.0702474	-0.0062297	0.00579467	0.00587702	0.0259121	-0.00747016	-0.0013962	-0.0025305	-0.00665006	0.0396967	0.00420833	0.000891345	0.0142882	0.00986278	-0.00283829	0.205601	0.0149207	-0.0117037	0.0347498	0.00912598	0.0174748	-0.0033928	0.0201873	-0.00347117	0.0170149	-0.000294543	0.0204302	-0.00837318	0.16159	0.192763	0.0181745	-0.00195833	0.016072	0.0139932	0.00516336	0.0109437	0.00340516
zf30C	0.0176131	0.0261452	0.0250184	0.0010706	0.0531855	0.00570766	0.00839868	0.00541615	0.0160256	0.0172867	0.0124286	-0.000439377	0.000292722	0.108223	-0.00829003	0.0119816	8.2878e-05	0.00353739	0.0288006	0.00271388	0.00176658	0.032753	0.012406	0.0326489	0.0389174	-0.00145121	0.0305459	-0.00295098	0.0505383	0.257349	0.00208681	0.00582189	4.40655e-05	-0.00059016	-0.00109607	0.112706	-0.00227246	0.0313497	0.00425415	-0.00756995	0.0190338	-0.00563549	0.00992945	0.0138022	0.0154417	0.0180111	0.00541615	0.00796481	0.031147
zfh1	0.0850875	0.0224594	0.0178505	0.0541014	0.0809834	0.0515418	0.0382567	0.0129244	0.0575199	0.04992	0.0367277	0.00306114	0.0125138	0.0859901	0.00537938	0.020505	0.0154713	0.021338	0.0485519	0.038543	0.00424767	0.0247081	0.0885911	0.0312166	0.0198903	0.00765309	0.0218504	-0.00881958	0.0929384	0.153788	0.0279323	0.00920037	0.0334071	0.0331026	0.0233493	0.0746207	0.0115134	0.0597757	0.0440525	-0.00329758	0.0211076	-0.00776207	0.048725	-0.00283829	0.0269401	0.0365086	0.0654301	0.0100714	0.0566213
zfh2	0.0146705	0.0237538	0.0124946	0.0623529	0.0255105	0.000768577	-0.00111073	-0.00133507	0.0754316	0.00201229	0.0268242	0.0076442	0.00464253	0.0212367	0.0125713	-0.00125564	0.00298161	0.054586	0.012044	0.0208219	0.0434848	0.0136075	0.0539685	0.00503488	0.0189617	0.046028	0.0204415	0.00882931	0.00457268	0.0174721	0.0388617	-0.000201539	0.0169688	-0.00143417	0.0240586	0.0430938	-0.00177023	0.0572757	0.00429938	0.0332933	0.0212336	0.00379731	0.022441	-0.000827803	0.0603569	0.00682977	-0.00133507	0.015484	0.00203582
zld	0.00376632	-0.00417827	0.0146373	-0.00267097	0.012	-0.00321928	-0.000753438	-0.000905613	0.00216062	0.00622369	-0.00123084	0.00587804	-0.00222917	0.0064525	-0.00222917	-0.000851732	-0.00259836	0.0100017	-0.00229244	0.0025529	0.0117238	0.0252257	0.0162326	0.0264885	-0.000870062	0.0106981	-0.000813837	-0.00372836	0.00367221	0.0231329	0.00618691	-0.00354229	-0.00391834	-0.000972835	-0.00737104	0.00804862	-0.00413145	0.00931616	0.0106207	-0.00240088	0.0180841	-0.0024075	0.0078764	-0.000561521	0.00948728	0.0122164	-0.000905613	-0.00103572	-0.00284458
[truncated: 435 more columns]

## Sheet: s5.Worm_L4_yAd
TF	B0261.1	D1046.2	D2030.7	F10B5.3	F10E7.11	F22D6.2	F23B12.7	F26F4.8	F33H1.4	F37B4.10	F39B2.1	F44E2.7	F52B5.7	F57C9.4	K11D2.4	K12H6.12	R02D3.7	T07F8.4	T20F7.1	Y105C5A.15	Y48G9A.11	Y53G8AR.9	Y56A3A.18	Y5F2A.4	Y67H2A.10	Y75B8A.6	Y79H2A.3	Y95B8A.8	ZK185.1	ZK337.2	ZK546.5	aha-1	aptf-2	aptf-3	arid-1	atf-7	athp-1	attf-3	attf-4	attf-5	attf-6	bed-1	bed-2	cebp-1	cebp-2	ceh-100	ceh-20	ceh-27	ceh-32
B0261.1	1	0.164489	0.277372	0.0349623	0.0795271	0.0302848	0.11247	0.311159	0.0521144	0.0217728	0.065913	0.192013	0.0823908	0.0448545	0.0375471	-0.00296525	-0.0113047	0.196889	0.00409541	0.19378	0.205144	0.0825789	0.193654	0.0949599	0.0186476	0.132144	0.068135	0.0848145	0.13666	0.151666	-0.00362662	-0.00889165	0.0200286	0.114791	0.253039	0.0336022	0.11606	0.043918	0.0267357	0.0357955	0.149931	0.0737227	0.0343047	0.0409853	0.111878	0.117509	0.0450272	0.0345799	0.00756495
D1046.2	0.164489	1	0.138022	0.0433538	0.00868276	0.00645637	0.0430021	0.19589	0.0786951	0.11162	0.103023	0.18648	0.0785009	0.0513714	0.100954	0.00255921	-0.00794311	0.0838844	-0.00864407	0.165012	0.167125	0.119605	0.144089	0.0704659	0.0950698	0.160168	0.0825488	0.112385	0.0639514	0.160686	-0.00368182	-0.00291015	0.0923145	0.133494	0.172298	0.0247313	0.0503233	0.0718089	-0.00368182	0.0153822	0.0774467	0.14576	0.0860505	0.0332812	0.137471	0.111587	0.0714347	0.0332642	0.00732665
D2030.7	0.277372	0.138022	1	0.0266601	0.0347156	0.0022506	0.198195	0.185079	0.500596	0.0452286	0.182427	0.121431	0.0721734	0.026998	0.0175293	-0.0135478	0.0287377	0.111304	-0.0236134	0.145004	0.307664	0.19779	0.163541	0.0565527	0.180012	0.110978	0.234664	0.295352	0.0703684	0.109266	0.0139394	-0.0103363	0.148856	0.166635	0.239919	0.0046754	0.191182	0.174538	-0.00586634	0.033136	0.292784	0.0759598	0.104939	0.0423825	0.101556	0.313273	0.00451929	0.0117329	0.00054597
F10B5.3	0.0349623	0.0433538	0.0266601	1	0.0109128	0.0231846	0.0269978	0.0268079	0.015422	0.0205587	0.0254187	0.0337719	0.0672143	0.0408226	0.00629159	0.0116026	0.00569731	0.069854	0.0119867	0.036101	0.0158878	0.0416332	0.0740052	0.0304886	0.0166324	-0.00201822	0.0269026	0.040052	0.0279586	0.00611048	-0.00121246	-0.00297267	-0.00131894	0.00981765	0.0670015	0.0234136	0.0570742	-0.00179347	-0.00121246	0.014527	0.0267752	0.00771694	0.0154594	0.0314743	0.02026	0.0224235	0.00168031	0.0133432	0.0336093
F10E7.11	0.0795271	0.00868276	0.0347156	0.0109128	1	0.0692505	0.0305172	0.0303194	0.028977	0.0106501	0.0717331	0.0244872	0.115161	0.0675126	0.0374995	0.0038479	-0.00466172	0.0440187	0.0436438	0.0647442	0.0499055	0.113525	0.137409	0.15991	-0.00462214	0.0751008	0.0989944	0.0590553	0.0235137	0.00770107	-0.00112726	-0.00276379	0.0214728	0.0717996	0.0966334	0.0981412	0.170501	0.0152818	-0.00112726	0.0390012	0.0464123	0.0655987	0.00626927	0.0629156	0.0681136	0.0725203	0.00812061	0.0403326	-0.00141325
F22D6.2	0.0302848	0.00645637	0.0022506	0.0231846	0.0692505	1	0.0216713	0.00558585	-0.0140424	0.00272295	0.0120135	0.0154729	0.0286436	0.0408226	0.0716524	0.0204487	-0.00501404	-0.0036428	0.0579108	0.0246843	0.00879542	0.0416332	0.056643	0.0136551	0.00583048	0.0365659	-0.0103092	0.00931223	0.0279586	0.00611048	-0.00121246	-0.00297267	-0.00131894	0.00361918	0.00790515	0.095507	0.0139978	-0.00179347	-0.00121246	0.0195993	-0.0088322	0.0151923	0.00512896	0.0618938	0.0110424	-0.00174077	0.069003	-0.0038212	-0.00152006
F23B12.7	0.11247	0.0430021	0.198195	0.0269978	0.0305172	0.0216713	1	0.0584914	0.171331	-0.00053999	0.028913	0.036618	0.0282228	0.0105643	0.0230074	0.00844801	0.0542246	0.117475	0.0843942	0.0669684	0.12532	0.0629571	0.0671854	0.0842462	0.0633865	0.0486835	0.0670641	0.101541	0.0751353	0.0315577	0.0314167	-0.000679683	0.0266157	0.028239	0.114767	0.0331004	0.10438	0.114066	-0.00315848	0.135073	0.0716771	0.0105049	0.0188967	0.0968022	0.0194004	0.127772	0.0268588	0.0268062	-0.00395979
F26F4.8	0.311159	0.19589	0.185079	0.0268079	0.0303194	0.00558585	0.0584914	1	0.0573145	0.0829673	0.115126	0.255738	0.058069	0.0104705	0.0397445	-0.0090109	-0.0131162	0.139929	-0.0227818	0.231694	0.174412	0.0730842	0.160009	0.0640982	0.0503589	0.163994	0.0790553	0.0871348	0.0802425	0.175366	-0.00317167	0.00629652	0.0474113	0.16611	0.227937	-0.00410637	0.0560803	0.0492717	-0.00317167	0.00934668	0.108654	0.136014	0.0793101	0.00891746	0.147037	0.0986786	0.0450378	0.00188683	-0.00397632
F33H1.4	0.0521144	0.0786951	0.500596	0.015422	0.028977	-0.0140424	0.171331	0.0573145	1	0.0453966	0.17749	0.0569464	0.0623762	0.0157414	0.0261647	-0.0172914	0.0747193	0.0326895	-0.0151421	0.079405	0.241789	0.172827	0.102211	0.057073	0.164926	0.0690789	0.200799	0.255665	0.0233774	0.0603088	0.0225682	-0.0110982	0.118779	0.111847	0.144216	-0.0124376	0.161516	0.162156	-0.0061204	0.036741	0.198634	0.062517	0.0993818	0.0348408	0.0705388	0.271992	-0.0190166	0.00401758	-0.00767315
F37B4.10	0.0217728	0.11162	0.0452286	0.0205587	0.0106501	0.00272295	-0.00053999	0.0829673	0.0453966	1	0.0810749	0.0888721	0.0518088	0.0227247	0.064987	0.00524643	-0.0116394	0.0108683	-0.0148327	0.0678482	0.0731279	0.062005	0.0501616	0.0368821	0.0831314	0.0762002	0.0808984	0.070715	0.0259755	0.0641662	-0.00281456	0.00886893	0.0521377	0.0665445	0.0803437	-0.00344765	0.0265418	0.0537371	-0.00281456	-0.00514545	0.0487865	0.110965	0.110154	0.0110953	0.0912999	0.0709419	0.027868	0.00292041	-0.00352861
F39B2.1	0.065913	0.103023	0.182427	0.0254187	0.0717331	0.0120135	0.028913	0.115126	0.17749	0.0810749	1	0.0962182	0.118487	0.0270209	0.0466772	-0.00374052	-0.0102768	0.0796788	-0.00352971	0.197546	0.182642	0.277556	0.222505	0.109916	0.165919	0.154242	0.230996	0.249614	0.0300894	0.0733286	-0.00248506	-0.0060928	0.096624	0.217806	0.214854	0.0811623	0.197361	0.100419	-0.00248506	0.0128768	0.23997	0.162444	0.11693	0.0671501	0.189435	0.284625	0.0218455	0.00588108	-0.00311552
F44E2.7	0.192013	0.18648	0.121431	0.0337719	0.0244872	0.0154729	0.036618	0.255738	0.0569464	0.0888721	0.0962182	1	0.0791341	0.013883	0.0581006	0.00214547	-0.00651666	0.123943	-0.005713	0.201662	0.150316	0.0810558	0.138887	0.0760679	0.0616119	0.157269	0.0651318	0.0800113	0.0627584	0.138673	-0.00274033	-0.00671867	0.0484144	0.122289	0.190313	0.0151142	0.0571982	0.0565224	-0.00274033	0.0234031	0.0856112	0.134891	0.0811348	0.0251878	0.144861	0.102418	0.0552393	0.00672819	-0.00343555
F52B5.7	0.0823908	0.0785009	0.0721734	0.0672143	0.115161	0.0286436	0.0282228	0.058069	0.0623762	0.0518088	0.118487	0.0791341	1	0.10808	0.0764999	0.00624935	-0.00825345	0.0863638	0.0212012	0.0895564	0.105178	0.19905	0.145862	0.101399	0.0401489	0.132857	0.136014	0.123383	0.0704357	0.0171152	0.0148357	-0.000164707	0.0344626	0.0987738	0.141686	0.090083	0.217231	0.0221643	-0.00304775	0.0263276	0.120422	0.0668262	0.0246858	0.0974306	0.108348	0.112651	0.0142654	0.0201636	-0.00382097
F57C9.4	0.0448545	0.0513714	0.026998	0.0408226	0.0675126	0.0408226	0.0105643	0.0104705	0.0157414	0.0227247	0.0270209	0.013883	0.10808	1	0.0371682	0.0103063	-0.00313509	0.0446278	0.0256713	0.0213418	0.046558	0.0825875	0.054321	0.0248704	0.014126	0.0665381	0.0529254	0.0551519	0.074694	0.00621903	-0.000758104	-0.0018587	0.0379472	0.0142909	0.0658296	0.0823153	0.0983777	0.0390029	-0.000758104	0.00131854	0.0241117	0.0670383	0.0132299	0.0615039	0.0366159	0.0314219	0.035375	0.00316191	-0.000950435
K11D2.4	0.0375471	0.100954	0.0175293	0.00629159	0.0374995	0.0716524	0.0230074	0.0397445	0.0261647	0.064987	0.0466772	0.0581006	0.0764999	0.0371682	1	0.0874975	0.000142871	0.00843517	0.0475667	0.0650382	0.07169	0.122807	0.105082	0.0189453	0.104441	0.120498	0.0420635	0.0806595	0.0634592	0.0806504	0.0145927	0.0285544	0.0579211	0.0423667	0.10707	0.0706472	0.0269309	0.0599385	-0.00308506	0.0498147	0.0108698	0.0686271	0.0821547	0.124759	0.069379	0.0699296	0.146807	0.0744905	0.0102357
K12H6.12	-0.00296525	0.00255921	-0.0135478	0.0116026	0.0038479	0.0204487	0.00844801	-0.0090109	-0.0172914	0.00524643	-0.00374052	0.00214547	0.00624935	0.0103063	0.0874975	1	-0.00074735	-0.0056171	-0.00137357	-0.011028	-0.0108414	-0.014507	-0.0112554	-0.00490105	0.00642061	0.00374412	-0.00549798	-0.00804451	0.011456	0.0061142	-0.00186958	0.0188802	-0.00363607	0.0228395	0.00166367	0.0137234	0.00241651	-0.00191587	-0.00186958	0.0494395	-0.0246001	-0.00628005	-0.00128471	0.0895419	-0.00648594	-0.00498373	0.0737051	0.160623	-0.00234389
R02D3.7	-0.0113047	-0.00794311	0.0287377	0.00569731	-0.00466172	-0.00501404	0.0542246	-0.0131162	0.0747193	-0.0116394	-0.0102768	-0.00651666	-0.00825345	-0.00313509	0.000142871	-0.00074735	1	-0.00462504	0.109819	-0.00763808	0.116841	-0.00219904	0.00430319	-0.00403545	0.0107448	-0.00564987	0.00789642	0.0220839	-0.00404743	-0.00989587	0.0332251	-0.00377421	-0.00490818	-0.0111446	-0.00342926	-0.0037621	0.00176298	0.202448	-0.00153938	0.0102724	-0.00619897	-0.00328228	-0.00660395	0.017417	-0.0115991	0.00841177	-0.0148518	-0.00759851	-0.00192992
T07F8.4	0.196889	0.0838844	0.111304	0.069854	0.0440187	-0.0036428	0.117475	0.139929	0.0326895	0.0108683	0.0796788	0.123943	0.0863638	0.0446278	0.00843517	-0.0056171	-0.00462504	1	0.0122574	0.127243	0.112009	0.0849422	0.124571	0.1065	0.0305251	0.0897511	0.0653669	0.0834955	0.131721	0.135932	-0.00111839	-0.00274204	0.0217599	0.0926414	0.161617	0.0329647	0.125282	0.0312405	0.0465895	0.0504584	0.108739	0.0824201	0.00639482	0.04606	0.0588389	0.0837312	0.0470084	0.0407901	-0.00140213
T20F7.1	0.00409541	-0.00864407	-0.0236134	0.0119867	0.0436438	0.0579108	0.0843942	-0.0227818	-0.0151421	-0.0148327	-0.00352971	-0.005713	0.0212012	0.0256713	0.0475667	-0.00137357	0.109819	0.0122574	1	0.0237743	0.0617305	0.0719474	0.0785217	0.0306579	-0.00640461	0.065104	-0.00207565	0.0277332	0.0917675	-0.00939458	-0.00538378	0.0129029	-0.0162215	-0.0149973	0.0363018	0.137233	0.0185941	0.184693	0.00526267	0.108871	-0.0226278	0.00222077	-0.00810988	0.133466	0.00465396	0.0101139	0.0702172	-0.0119389	0.0187318
Y105C5A.15	0.19378	0.165012	0.145004	0.036101	0.0647442	0.0246843	0.0669684	0.231694	0.079405	0.0678482	0.197546	0.201662	0.0895564	0.0213418	0.0650382	-0.011028	-0.00763808	0.127243	0.0237743	1	0.176038	0.177502	0.246581	0.112708	0.106127	0.185171	0.127126	0.141208	0.0803412	0.112757	-0.00293679	-0.00720035	0.0626721	0.171733	0.239765	0.0461174	0.111629	0.053442	0.01559	0.0313802	0.148632	0.16176	0.0743325	0.0664709	0.166787	0.147248	0.0473476	0.00336658	-0.00368186
Y48G9A.11	0.205144	0.167125	0.307664	0.0158878	0.0499055	0.00879542	0.12532	0.174412	0.241789	0.0731279	0.182642	0.150316	0.105178	0.046558	0.07169	-0.0108414	0.116841	0.112009	0.0617305	0.176038	1	0.212925	0.180613	0.0795015	0.177468	0.145566	0.19438	0.25401	0.0713814	0.13192	0.00658867	-0.00265857	0.129275	0.155559	0.261985	0.0368084	0.185207	0.382056	-0.00492085	0.0342521	0.22564	0.113281	0.149005	0.0603533	0.150064	0.292256	0.0263754	0.0106226	-0.00616927
Y53G8AR.9	0.0825789	0.119605	0.19779	0.0416332	0.113525	0.0416332	0.0629571	0.0730842	0.172827	0.062005	0.277556	0.0810558	0.19905	0.0825875	0.122807	-0.014507	-0.00219904	0.0849422	0.0719474	0.177502	0.212925	1	0.304712	0.109973	0.151025	0.187026	0.288373	0.331791	0.0811677	0.0584947	0.0171432	0.00565125	0.086885	0.171332	0.260108	0.135011	0.238557	0.0943285	0.0171432	0.0273726	0.246785	0.114965	0.082496	0.161601	0.166035	0.278014	0.0433629	0.0118063	-0.00641161
Y56A3A.18	0.193654	0.144089	0.163541	0.0740052	0.137409	0.056643	0.0671854	0.160009	0.102211	0.0501616	0.222505	0.138887	0.145862	0.054321	0.105082	-0.0112554	0.00430319	0.124571	0.0785217	0.246581	0.180613	0.304712	1	0.140492	0.0979254	0.21332	0.185971	0.213297	0.16423	0.128204	0.010156	-0.0038826	0.0514565	0.187697	0.254307	0.131259	0.182275	0.0554668	0.0242436	0.0460089	0.176111	0.124825	0.0657607	0.124983	0.170467	0.19649	0.0554437	0.0239721	-0.00492894
Y5F2A.4	0.0949599	0.0704659	0.0565527	0.0304886	0.15991	0.0136551	0.0842462	0.0640982	0.057073	0.0368821	0.109916	0.0760679	0.101399	0.0248704	0.0189453	-0.00490105	-0.00403545	0.1065	0.0306579	0.112708	0.0795015	0.109973	0.140492	1	0.0362073	0.0410744	0.0840461	0.0824519	0.0291818	0.0109796	-0.000975821	-0.00239249	0.00187462	0.0544628	0.136027	0.0539924	0.154276	0.00874221	-0.000975821	0.0542156	0.0711037	0.0591047	-0.00418628	0.0566408	0.0818371	0.11075	0.00825807	0.0207161	-0.00122339
Y67H2A.10	0.0186476	0.0950698	0.180012	0.0166324	-0.00462214	0.00583048	0.0633865	0.0503589	0.164926	0.0831314	0.165919	0.0616119	0.0401489	0.014126	0.104441	0.00642061	0.0107448	0.0305251	-0.00640461	0.106127	0.177468	0.151025	0.0979254	0.0362073	1	0.0815259	0.236744	0.235825	0.0130748	0.106433	-0.00152631	0.0105838	0.225809	0.0975249	0.141344	0.000833704	0.121981	0.192891	-0.00152631	0.0065539	0.15569	0.109931	0.223754	0.0647228	0.0913083	0.251147	0.0420826	0.0107643	-0.00191353
Y75B8A.6	0.132144	0.160168	0.110978	-0.00201822	0.0751008	0.0365659	0.0486835	0.163994	0.0690789	0.0762002	0.154242	0.157269	0.132857	0.0665381	0.120498	0.00374412	-0.00564987	0.0897511	0.065104	0.185171	0.145566	0.187026	0.21332	0.0410744	0.0815259	1	0.0938536	0.129061	0.115226	0.1448	-0.00259393	0.0362832	0.0785414	0.142814	0.205855	0.110336	0.0859588	0.0600881	-0.00259393	0.0176933	0.119457	0.147516	0.086804	0.0963535	0.170935	0.131369	0.0785777	0.00128015	0.0133993
Y79H2A.3	0.068135	0.0825488	0.234664	0.0269026	0.0989944	-0.0103092	0.0670641	0.0790553	0.200799	0.0808984	0.230996	0.0651318	0.136014	0.0529254	0.0420635	-0.00549798	0.00789642	0.0653669	-0.00207565	0.127126	0.19438	0.288373	0.185971	0.0840461	0.236744	0.0938536	1	0.324897	0.0693311	0.0450337	0.0140883	-0.000709821	0.126761	0.178674	0.1971	0.0351035	0.244751	0.136389	-0.00316508	0.0253797	0.25135	0.0953514	0.107856	0.10366	0.125783	0.26185	0.00182814	0.0311359	-0.00396806
Y95B8A.8	0.0848145	0.112385	0.295352	0.040052	0.0590553	0.00931223	0.101541	0.0871348	0.255665	0.070715	0.249614	0.0800113	0.123383	0.0551519	0.0806595	-0.00804451	0.0220839	0.0834955	0.0277332	0.141208	0.25401	0.331791	0.213297	0.0824519	0.235825	0.129061	0.324897	1	0.0861588	0.0808116	0.0103705	-0.00369404	0.128995	0.142435	0.2269	0.0779265	0.243101	0.155332	0.0103705	0.0326246	0.247431	0.10508	0.123785	0.131605	0.142081	0.313886	0.0302895	0.0175965	-0.00486701
ZK185.1	0.13666	0.0639514	0.0703684	0.0279586	0.0235137	0.0279586	0.0751353	0.0802425	0.0233774	0.0259755	0.0300894	0.0627584	0.0704357	0.074694	0.0634592	0.011456	-0.00404743	0.131721	0.0917675	0.0803412	0.0713814	0.0811677	0.16423	0.0291818	0.0130748	0.115226	0.0693311	0.0861588	1	0.0834088	0.0207523	0.0225752	0.0303882	0.0383366	0.109578	0.0653264	0.0607598	0.0133517	-0.00233691	0.05891	0.0476708	0.025256	0.0278934	0.0988339	0.0687034	0.0236306	0.0661537	0.0506112	-0.00292978
ZK337.2	0.151666	0.160686	0.109266	0.00611048	0.00770107	0.00611048	0.0315577	0.175366	0.0603088	0.0641662	0.0733286	0.138673	0.0171152	0.00621903	0.0806504	0.0061142	-0.00989587	0.135932	-0.00939458	0.112757	0.13192	0.0584947	0.128204	0.0109796	0.106433	0.1448	0.0450337	0.0808116	0.0834088	1	-0.00239294	0.0217945	0.118708	0.0938504	0.151324	0.00327453	0.0292671	0.0960202	-0.00239294	0.0176065	0.0725216	0.108307	0.148549	0.0341987	0.0896793	0.108748	0.0796103	0.0280779	-0.00300003
ZK546.5	-0.00362662	-0.00368182	0.0139394	-0.00121246	-0.00112726	-0.00121246	0.0314167	-0.00317167	0.0225682	-0.00281456	-0.00248506	-0.00274033	0.0148357	-0.000758104	0.0145927	-0.00186958	0.0332251	-0.00111839	-0.00538378	-0.00293679	0.00658867	0.0171432	0.010156	-0.000975821	-0.00152631	-0.00259393	0.0140883	0.0103705	0.0207523	-0.00239294	1	-0.000912651	-0.00247269	0.0174227	0.0233475	-0.00302723	-0.00231502	-0.00351098	-0.000372241	-0.00332625	0.00665866	-0.00222086	-0.00159692	-0.000702449	-0.00368471	-0.00350194	0.00850558	0.0156397	-0.000466679
aha-1	-0.00889165	-0.00291015	-0.0103363	-0.00297267	-0.00276379	-0.00297267	-0.000679683	0.00629652	-0.0110982	0.00886893	-0.0060928	-0.00671867	-0.000164707	-0.0018587	0.0285544	0.0188802	-0.00377421	-0.00274204	0.0129029	-0.00720035	-0.00265857	0.00565125	-0.0038826	-0.00239249	0.0105838	0.0362832	-0.000709821	-0.00369404	0.0225752	0.0217945	-0.000912651	1	0.0207343	0.00161336	0.0124565	0.00728758	-0.0056759	0.0105741	-0.000912651	0.0254798	-0.00728641	0.00446902	0.00978528	0.0200011	0.00319071	-0.00858597	0.00509743	0.015581	-0.00114419
aptf-2	0.0200286	0.0923145	0.148856	-0.00131894	0.0214728	-0.00131894	0.0266157	0.0474113	0.118779	0.0521377	0.096624	0.0484144	0.0344626	0.0379472	0.0579211	-0.00363607	-0.00490818	0.0217599	-0.0162215	0.0626721	0.129275	0.086885	0.0514565	0.00187462	0.225809	0.0785414	0.126761	0.128995	0.0303882	0.118708	-0.00247269	0.0207343	1	0.188266	0.0883326	-0.00359072	0.0701603	0.125069	-0.00247269	0.0156752	0.110645	0.0743117	0.158628	0.0273618	0.0556027	0.144681	0.0222362	0.0061016	-0.00310001
aptf-3	0.114791	0.133494	0.166635	0.00981765	0.0717996	0.00361918	0.028239	0.16611	0.111847	0.0665445	0.217806	0.122289	0.0987738	0.0142909	0.0423667	0.0228395	-0.0111446	0.0926414	-0.0149973	0.171733	0.155559	0.171332	0.187697	0.0544628	0.0975249	0.142814	0.178674	0.142435	0.0383366	0.0938504	0.0174227	0.00161336	0.188266	1	0.184731	0.0338255	0.137407	0.0516772	-0.0026949	0.00604559	0.171149	0.164935	0.0969939	0.0500489	0.152308	0.151291	0.0408993	0.0232284	-0.00337859
arid-1	0.253039	0.172298	0.239919	0.0670015	0.0966334	0.00790515	0.114767	0.227937	0.144216	0.0803437	0.214854	0.190313	0.141686	0.0658296	0.10707	0.00166367	-0.00342926	0.161617	0.0363018	0.239765	0.261985	0.260108	0.254307	0.136027	0.141344	0.205855	0.1971	0.2269	0.109578	0.151324	0.0233475	0.0124565	0.0883326	0.184731	1	0.0619411	0.202641	0.10878	-0.0040528	0.0490063	0.205917	0.145608	0.107967	0.13245	0.177847	0.264112	0.0746506	0.0268478	0.0167792
atf-7	0.0336022	0.0247313	0.0046754	0.0234136	0.0981412	0.095507	0.0331004	-0.00410637	-0.0124376	-0.00344765	0.0811623	0.0151142	0.090083	0.0823153	0.0706472	0.0137234	-0.0037621	0.0329647	0.137233	0.0461174	0.0368084	0.135011	0.131259	0.0539924	0.000833704	0.110336	0.0351035	0.0779265	0.0653264	0.00327453	-0.00302723	0.00728758	-0.00359072	0.0338255	0.0619411	1	0.0780176	-0.00687473	-0.00302723	0.0600301	0.0227538	0.033885	-0.000318745	0.168779	0.0642303	0.0465893	0.108715	0.011255	0.0105644
athp-1	0.11606	0.0503233	0.191182	0.0570742	0.170501	0.0139978	0.10438	0.0560803	0.161516	0.0265418	0.197361	0.0571982	0.217231	0.0983777	0.0269309	0.00241651	0.00176298	0.125282	0.0185941	0.111629	0.185207	0.238557	0.182275	0.154276	0.121981	0.0859588	0.244751	0.243101	0.0607598	0.0292671	-0.00231502	-0.0056759	0.0701603	0.137407	0.202641	0.0780176	1	0.103179	-0.00231502	0.0491018	0.19377	0.0494817	0.0611358	0.109376	0.116103	0.213509	0.0127804	0.0241677	-0.00290234
attf-3	0.043918	0.0718089	0.174538	-0.00179347	0.0152818	-0.00179347	0.114066	0.0492717	0.162156	0.0537371	0.100419	0.0565224	0.0221643	0.0390029	0.0599385	-0.00191587	0.202448	0.0312405	0.184693	0.053442	0.382056	0.0943285	0.0554668	0.00874221	0.192891	0.0600881	0.136389	0.155332	0.0133517	0.0960202	-0.00351098	0.0105741	0.125069	0.0516772	0.10878	-0.00687473	0.103179	1	-0.00351098	0.0299119	0.0967885	0.0720297	0.135452	0.0398221	0.063515	0.198823	0.0237313	-0.00933428	-0.00440171
attf-4	0.0267357	-0.00368182	-0.00586634	-0.00121246	-0.00112726	-0.00121246	-0.00315848	-0.00317167	-0.0061204	-0.00281456	-0.00248506	-0.00274033	-0.00304775	-0.000758104	-0.00308506	-0.00186958	-0.00153938	0.0465895	0.00526267	0.01559	-0.00492085	0.0171432	0.0242436	-0.000975821	-0.00152631	-0.00259393	-0.00316508	0.0103705	-0.00233691	-0.00239294	-0.000372241	-0.000912651	-0.00247269	-0.0026949	-0.0040528	-0.00302723	-0.00231502	-0.00351098	1	-0.00332625	-0.004898	-0.00222086	-0.00159692	0.00689208	0.0112736	-0.00350194	-0.00434742	-0.00292973	-0.000466679
attf-5	0.0357955	0.0153822	0.033136	0.014527	0.0390012	0.0195993	0.135073	0.00934668	0.036741	-0.00514545	0.0128768	0.0234031	0.0263276	0.00131854	0.0498147	0.0494395	0.0102724	0.0504584	0.108871	0.0313802	0.0342521	0.0273726	0.0460089	0.0542156	0.0065539	0.0176933	0.0253797	0.0326246	0.05891	0.0176065	-0.00332625	0.0254798	0.0156752	0.00604559	0.0490063	0.0600301	0.0491018	0.0299119	-0.00332625	1	0.000164107	0.00530822	0.00890373	0.20406	0.0222136	0.0554366	0.0351818	0.0978875	-0.00417012
attf-6	0.149931	0.0774467	0.292784	0.0267752	0.0464123	-0.0088322	0.0716771	0.108654	0.198634	0.0487865	0.23997	0.0856112	0.120422	0.0241117	0.0108698	-0.0246001	-0.00619897	0.108739	-0.0226278	0.148632	0.22564	0.246785	0.176111	0.0711037	0.15569	0.119457	0.25135	0.247431	0.0476708	0.0725216	0.00665866	-0.00728641	0.110645	0.171149	0.205917	0.0227538	0.19377	0.0967885	-0.004898	0.000164107	1	0.102229	0.090151	0.0406781	0.141427	0.288784	-0.00835319	0.000492992	-0.00614063
bed-1	0.0737227	0.14576	0.0759598	0.00771694	0.0655987	0.0151923	0.0105049	0.136014	0.062517	0.110965	0.162444	0.134891	0.0668262	0.0670383	0.0686271	-0.00628005	-0.00328228	0.0824201	0.00222077	0.16176	0.113281	0.114965	0.124825	0.0591047	0.109931	0.147516	0.0953514	0.10508	0.025256	0.108307	-0.00222086	0.00446902	0.0743117	0.164935	0.145608	0.033885	0.0494817	0.0720297	-0.00222086	0.00530822	0.102229	1	0.0872373	0.0343044	0.112608	0.112251	0.0351598	-0.00171669	-0.00278429
bed-2	0.0343047	0.0860505	0.104939	0.0154594	0.00626927	0.00512896	0.0188967	0.0793101	0.0993818	0.110154	0.11693	0.0811348	0.0246858	0.0132299	0.0821547	-0.00128471	-0.00660395	0.00639482	-0.00810988	0.0743325	0.149005	0.082496	0.0657607	-0.00418628	0.223754	0.086804	0.107856	0.123785	0.0278934	0.148549	-0.00159692	0.00978528	0.158628	0.0969939	0.107967	-0.000318745	0.0611358	0.135452	-0.00159692	0.00890373	0.090151	0.0872373	1	0.0374576	0.100001	0.132174	0.05372	0.022284	-0.00200205
cebp-1	0.0409853	0.0332812	0.0423825	0.0314743	0.0629156	0.0618938	0.0968022	0.00891746	0.0348408	0.0110953	0.0671501	0.0251878	0.0974306	0.0615039	0.124759	0.0895419	0.017417	0.04606	0.133466	0.0664709	0.0603533	0.161601	0.124983	0.0566408	0.0647228	0.0963535	0.10366	0.131605	0.0988339	0.0341987	-0.000702449	0.0200011	0.0273618	0.0500489	0.13245	0.168779	0.109376	0.0398221	0.00689208	0.20406	0.0406781	0.0343044	0.0374576	1	0.068904	0.0761512	0.104594	0.0679187	0.00171605
cebp-2	0.111878	0.137471	0.101556	0.02026	0.0681136	0.0110424	0.0194004	0.147037	0.0705388	0.0912999	0.189435	0.144861	0.108348	0.0366159	0.069379	-0.00648594	-0.0115991	0.0588389	0.00465396	0.166787	0.150064	0.166035	0.170467	0.0818371	0.0913083	0.170935	0.125783	0.142081	0.0687034	0.0896793	-0.00368471	0.00319071	0.0556027	0.152308	0.177847	0.0642303	0.116103	0.063515	0.0112736	0.0222136	0.141427	0.112608	0.100001	0.068904	1	0.149214	0.0457567	0.0059851	0.00731434
ceh-100	0.117509	0.111587	0.313273	0.0224235	0.0725203	-0.00174077	0.127772	0.0986786	0.271992	0.0709419	0.284625	0.102418	0.112651	0.0314219	0.0699296	-0.00498373	0.00841177	0.0837312	0.0101139	0.147248	0.292256	0.278014	0.19649	0.11075	0.251147	0.131369	0.26185	0.313886	0.0236306	0.108748	-0.00350194	-0.00858597	0.144681	0.151291	0.264112	0.0465893	0.213509	0.198823	-0.00350194	0.0554366	0.288784	0.112251	0.132174	0.0761512	0.149214	1	0.0324573	0.0152385	-0.00439039
ceh-20	0.0450272	0.0714347	0.00451929	0.00168031	0.00812061	0.069003	0.0268588	0.0450378	-0.0190166	0.027868	0.0218455	0.0552393	0.0142654	0.035375	0.146807	0.0737051	-0.0148518	0.0470084	0.0702172	0.0473476	0.0263754	0.0433629	0.0554437	0.00825807	0.0420826	0.0785777	0.00182814	0.0302895	0.0661537	0.0796103	0.00850558	0.00509743	0.0222362	0.0408993	0.0746506	0.108715	0.0127804	0.0237313	-0.00434742	0.0351818	-0.00835319	0.0351598	0.05372	0.104594	0.0457567	0.0324573	1	0.0593086	0.00480388
ceh-27	0.0345799	0.0332642	0.0117329	0.0133432	0.0403326	-0.0038212	0.0268062	0.00188683	0.00401758	0.00292041	0.00588108	0.00672819	0.0201636	0.00316191	0.0744905	0.160623	-0.00759851	0.0407901	-0.0119389	0.00336658	0.0106226	0.0118063	0.0239721	0.0207161	0.0107643	0.00128015	0.0311359	0.0175965	0.0506112	0.0280779	0.0156397	0.015581	0.0061016	0.0232284	0.0268478	0.011255	0.0241677	-0.00933428	-0.00292973	0.0978875	0.000492992	-0.00171669	0.022284	0.0679187	0.0059851	0.0152385	0.0593086	1	-0.00367301
ceh-32	0.00756495	0.00732665	0.00054597	0.0336093	-0.00141325	-0.00152006	-0.00395979	-0.00397632	-0.00767315	-0.00352861	-0.00311552	-0.00343555	-0.00382097	-0.000950435	0.0102357	-0.00234389	-0.00192992	-0.00140213	0.0187318	-0.00368186	-0.00616927	-0.00641161	-0.00492894	-0.00122339	-0.00191353	0.0133993	-0.00396806	-0.00486701	-0.00292978	-0.00300003	-0.000466679	-0.00114419	-0.00310001	-0.00337859	0.0167792	0.0105644	-0.00290234	-0.00440171	-0.000466679	-0.00417012	-0.00614063	-0.00278429	-0.00200205	0.00171605	0.00731434	-0.00439039	0.00480388	-0.00367301	1
ceh-38	-0.00791928	0.0131185	-0.0111441	0.00422361	-0.00792675	-0.00215111	0.000315043	-0.00485227	0.00126464	0.00255651	-0.0143252	0.0294535	-0.00848612	0.00483996	0.00133977	0.0367318	-0.000758747	0.00594931	-0.00394884	-0.0126045	-0.0046098	-0.0069615	-0.0133693	-0.00686184	-0.0107328	0.0029111	-0.0122651	-0.00872789	-0.00306196	-0.00049317	-0.00261755	0.0104911	0.00160014	-0.0102126	-0.00271428	-0.00825829	0.0107084	0.011557	-0.00261755	0.0314265	-0.0126918	0.00545802	0.0130406	0.014223	-0.0150825	-0.0178127	-0.00265881	0.0304775	-0.00328162
ceh-40	0.16966	0.144277	0.170826	0.0310638	0.0768913	0.0245066	0.0633879	0.191179	0.109158	0.0756054	0.248675	0.196501	0.0883781	0.0471336	0.0684395	5.93199e-05	-0.0105125	0.155769	0.0171399	0.242051	0.185787	0.178865	0.245881	0.099106	0.140983	0.178099	0.173658	0.170881	0.107825	0.151673	-0.00254205	0.0111605	0.0644954	0.179327	0.249793	0.0436561	0.116052	0.0622422	-0.00254205	0.0336711	0.181678	0.151035	0.0989408	0.067747	0.16641	0.209672	0.0545303	0.0131771	-0.00318697
ceh-44	0.253602	0.17761	0.220766	0.0274936	0.00797613	0.0134176	0.109821	0.230327	0.115528	0.0654066	0.0920146	0.185119	0.0292469	-0.00481232	0.0623581	-0.0026897	-0.00421506	0.153036	-0.0120532	0.161996	0.220796	0.0760418	0.157433	0.0200035	0.169629	0.136991	0.0791873	0.114321	0.0737384	0.222848	-0.00236293	-0.00579336	0.117072	0.146886	0.202012	-0.00483192	0.0448954	0.117773	-0.00236293	0.0288803	0.133308	0.129386	0.172071	0.0250212	0.122455	0.178339	0.0689597	0.0348283	-0.0029624
ceh-58	0.0620492	0.125808	0.126566	0.00296697	0.0820764	0.0089802	0.0165344	0.124449	0.099228	0.100184	0.230977	0.130922	0.104223	0.0423058	0.0590294	-0.00220698	-0.00675467	0.0502799	-0.00533348	0.172873	0.136128	0.188233	0.166856	0.104625	0.113076	0.160184	0.167202	0.161739	0.0266828	0.0838089	-0.00278138	0.00115563	0.071079	0.194156	0.183005	0.0289983	0.103623	0.0635156	-0.00278138	-0.00462025	0.148054	0.185516	0.102536	0.051053	0.16653	0.170902	0.0236843	0.0136119	-0.00348702
ceh-62	-0.00137052	-0.00139138	-0.00221691	-0.000458193	-0.000425997	-0.000458193	-0.0011936	-0.00119859	-0.00231293	-0.00106363	-0.000939115	-0.00103558	-0.00115176	-0.000286491	-0.00116586	-0.000706521	-0.000581739	-0.000422645	-0.00203455	-0.00110983	-0.00185961	0.0275063	-0.00148574	-0.000368767	-0.000576799	-0.000980257	-0.0011961	-0.00146707	-0.000883128	-0.000904303	-0.000140672	-0.000344895	-0.000934439	-0.00101841	0.0347098	-0.001144	-0.000874855	-0.00132681	-0.000140672	-0.001257	-0.00185098	-0.000839271	-0.000603482	-0.00313546	-0.00139247	-0.0013234	-0.00164291	-0.00110716	-0.00017636
ceh-79	0.0645755	0.0392296	0.033439	0.014775	0.111904	0.014775	0.0200913	0.00604006	0.0311609	0.0163958	0.0992609	0.0411727	0.14411	0.0264918	0.0209038	-0.00463815	-0.00381898	0.0550273	0.0167413	0.0450899	0.0621638	0.0996732	0.0926557	0.107902	0.0103722	0.0609974	0.0618275	0.0651978	0.0035273	0.0122892	0.0567923	-0.00226416	0.00269365	0.0583119	0.0950713	0.0506419	0.173056	0.0165675	-0.000923477	0.00504503	0.0718597	0.0630789	-0.00396172	0.0499603	0.0633514	0.0799979	-0.0055945	0.00773068	-0.00115776
ceh-91	0.0208316	0.0649451	0.467824	0.00344135	0.00563346	0.00344135	0.15279	0.0274187	0.524992	0.0388451	0.103082	0.0377053	0.0379841	0.0117245	0.0283448	-0.00414166	0.04593	0.0194874	-0.00949026	0.0541095	0.238292	0.1471	0.0586775	0.0152708	0.216687	0.0568897	0.193378	0.28005	0.0116786	0.0638758	0.0095071	0.00108904	0.155833	0.0660942	0.0988546	-0.00926951	0.147471	0.20556	-0.00408727	0.0120228	0.150694	0.0563913	0.135555	0.0244868	0.0534534	0.255487	-0.0098334	-0.00390619	-0.00512421
ces-1	-0.0165373	-0.00933046	-0.0283603	0.000211772	-0.00673928	-0.00724862	-0.0100957	-0.0102092	-0.0301096	-0.0135574	-0.0148568	-0.0163829	-0.0151909	-0.00453229	-0.00346817	0.0326027	-0.00920312	0.00139689	-0.0141484	-0.0144185	-0.0177187	-0.0268036	-0.0163438	-0.0058339	-0.00318501	-0.0155077	-0.015999	-0.00872014	-0.00223508	0.000986255	0.0219878	0.0143322	-0.0110793	-0.0127028	-0.0126234	-0.00285047	-0.00989229	-0.0130367	-0.00222543	-0.0170966	-0.0253664	-0.00916662	-0.00954709	-0.0174346	-0.00935694	-0.0182786	-0.00856938	0.0202394	0.0358451
ctbp-1	0.129355	0.116237	0.069438	0.0285126	0.0565243	0.013859	0.03311	0.117178	0.0230615	0.0379859	0.107697	0.0935555	0.0668064	0.0371003	0.129829	0.157717	-0.0138288	0.0889493	0.00669414	0.122886	0.11541	0.104276	0.121028	0.0921124	0.0738903	0.114548	0.0644607	0.0821596	0.0739577	0.114064	-0.00474278	0.0418155	0.0394217	0.114627	0.179746	0.0422925	0.071312	0.0385842	0.00714704	0.0370584	0.0741251	0.0807041	0.054969	0.0964782	0.0837247	0.102845	0.129605	0.12489	0.0699404
daf-16	0.0195613	-0.0381002	-0.0701858	0.0206083	0.014039	0.0631548	0.0639076	-0.0115415	-0.106985	-0.0400806	-0.0398517	-0.0214934	-0.0206972	0.0207048	0.0254963	0.0319738	-0.00649683	0.0409905	0.173389	-0.00841874	-0.0557602	-0.0157963	0.0307531	0.0102676	-0.0300149	0.0269332	-0.0437517	-0.0324373	0.0755835	0.00331064	0.015835	0.017328	-0.0343295	-0.0415313	0.0146313	0.144276	-0.0114912	-0.0346505	0.0026838	0.110982	-0.080835	-0.0300768	-0.0248502	0.151773	-0.0340994	-0.0486761	0.123179	-0.00634066	0.0131074
daf-19	0.145543	0.0817946	0.10644	0.0197697	0.044661	0.00596006	0.0500352	0.0955761	0.0428527	0.0120364	0.0998947	0.0784953	0.0615946	0.0171252	0.0271526	0.0194114	0.00638841	0.157346	0.0219077	0.120438	0.1017	0.115225	0.135812	0.079356	0.0231042	0.0879386	0.0660866	0.0977912	0.0790084	0.0729675	-0.00240994	-0.00590862	0.0114138	0.0803485	0.160668	0.0396726	0.0690529	0.00916814	0.0200002	0.0533291	0.0915214	0.0579084	0.00543427	0.0570397	0.0723164	0.0904726	0.0202266	0.0217995	0.0148577
daf-8	0.0996404	0.117761	0.0740761	0.0254972	0.0122646	0.0254972	0.0190652	0.144388	0.0384792	0.0681706	0.0573224	0.122845	0.0263107	-0.00229577	0.025789	0.0038479	-0.00466172	0.107226	0.00838056	0.119972	0.0804031	0.0398036	0.0814161	0.0694292	0.0650506	0.0889268	0.0704209	0.0684968	0.0235137	0.0899131	-0.00112726	-0.00276379	0.028713	0.078463	0.0830201	0.00275579	0.023861	0.0463787	-0.00112726	0.0226432	0.0540679	0.0977428	0.0729007	0.0226681	0.0829771	0.0465437	0.0336637	0.0157303	-0.00141325
die-1	0.394242	0.147647	0.266689	0.058572	0.107173	0.0452307	0.162137	0.257846	0.0791817	0.0161953	0.128333	0.173558	0.142107	0.0481288	0.0248296	-0.00819355	-0.0103277	0.281595	0.0219435	0.18238	0.188426	0.132596	0.210517	0.158989	0.0269381	0.124881	0.138206	0.135894	0.16971	0.113844	-0.00249738	0.00272384	0.0330836	0.125162	0.248849	0.0560382	0.199799	0.0214846	-0.00249738	0.08243	0.170228	0.0659615	0.0197621	0.0789469	0.111245	0.159476	0.0526135	0.0422339	-0.00313096
dmd-6	0.0246844	-0.00767427	-0.0683628	-0.00607093	-0.00771188	0.069044	0.0412058	-0.00609285	-0.105622	-0.0292167	-0.0263394	-0.0043055	-0.0311868	-0.00341235	0.08846	0.0480289	-0.0297469	0.00988407	0.147266	0.00662733	-0.0442246	-0.00129604	0.0365828	-0.00422318	0.000673481	0.0519404	-0.0452283	-0.0177609	0.055533	0.0206659	0.0018641	0.025543	-0.0208415	-0.0179849	0.0202076	0.175029	-0.0347318	-0.0409223	0.00827966	0.109669	-0.0861995	-0.0207754	0.0101472	0.179336	0.000896966	-0.0327596	0.180034	0.0345593	0.00160582
dmd-8	0.254404	0.185263	0.182211	0.0271235	0.0452134	0.0227118	0.0659527	0.267282	0.080207	0.08679	0.146398	0.221484	0.10634	0.0202885	0.0600872	0.000735352	-0.0124911	0.146133	-0.0142668	0.221973	0.186488	0.125331	0.180802	0.0719828	0.0684635	0.159194	0.107177	0.119651	0.0914178	0.146987	0.0104557	-0.00361967	0.077276	0.175613	0.259926	0.0208831	0.0786996	0.0497935	0.0104557	0.0265111	0.133277	0.144682	0.0808471	0.0402133	0.16259	0.130245	0.0566204	0.030995	0.00658067
dmd-9	0.0944921	0.174901	0.0957712	0.0213643	0.0242705	0.0152965	0.0171197	0.133134	0.0416712	0.082868	0.0655423	0.113392	0.0489079	0.0234319	0.0989669	-0.00196937	-0.0113945	0.0771874	0.00416269	0.116127	0.123766	0.0740953	0.10679	0.0454784	0.128806	0.147615	0.0669198	0.0812515	0.0495193	0.165745	-0.00275533	0.00129188	0.105199	0.0881708	0.122923	0.00487567	0.0374511	0.0839823	-0.00275533	0.0230189	0.0561124	0.117295	0.15913	0.0474269	0.10671	0.103768	0.0847184	0.0448462	0.0122573
dox-1	0.125744	0.0864674	0.264386	0.0237362	0.0260874	0.0446165	0.140294	0.0820915	0.212567	0.0444047	0.125147	0.0847601	0.0804368	0.0354378	0.0948903	0.0339328	0.00758023	0.0690518	0.039408	0.100738	0.175142	0.1612	0.14508	0.0493002	0.114128	0.0950177	0.121362	0.201834	0.0605824	0.0838631	0.00133469	0.0101954	0.0925317	0.116475	0.15943	0.132937	0.125505	0.0885128	0.0182768	0.155789	0.130102	0.0566539	0.0965782	0.166408	0.0827511	0.196914	0.0697893	0.0528035	0.0180863
dpff-1	0.0488468	0.0319672	0.0184435	0.0121543	0.0973511	0.0121543	0.0338952	-0.0028866	0.0402181	0.0193527	0.0545714	0.0202727	0.111658	0.0475945	0.00377914	0.00486911	-0.00435971	0.0643898	0.0412875	0.0638291	0.0553307	0.103708	0.103571	0.0165777	0.0204998	0.0887072	0.0887635	0.0545987	0.0424252	0.00919919	-0.00105423	-0.00258474	0.0162124	0.0635871	0.0758229	0.0615168	0.158424	0.0232934	-0.00105423	0.00806342	0.0556792	0.0452444	-0.00452266	0.0759793	0.042519	0.0567163	0.00588821	0.00485037	-0.00132169
dpl-1	0.0565194	0.00951558	0.252512	0.0171007	0.0245394	0.0144454	0.235814	0.00492491	0.256641	-0.0190162	0.0268775	0.0119026	0.0194359	0.00697123	0.0327801	0.0705639	0.126275	0.0509574	0.125064	0.0253876	0.129852	0.0678775	0.0588258	0.0410101	0.0792079	0.0281493	0.076964	0.13264	0.0787188	0.0463091	0.0188756	0.0498	0.0643732	0.0174188	0.0983457	0.0192292	0.0971158	0.173855	0.0102578	0.250353	0.049654	-0.00944392	0.0286979	0.174206	0.0112083	0.136769	0.0355406	0.0850532	0.011878
duxl-1	0.120151	0.0650245	0.0490927	0.0864031	0.057792	0.0391813	0.055862	0.0528338	-0.00542606	0.0286343	0.0435104	0.0606848	0.0784225	0.0272621	0.0662075	0.00959477	0.000443653	0.10222	0.0621623	0.091222	0.0678759	0.117827	0.133641	0.0102693	0.000620428	0.0851207	0.03452	0.0506804	0.122461	0.0705556	0.019426	-0.00605233	0.0204403	0.0530173	0.109554	0.0598924	0.0524754	0.0102787	-0.00246855	0.0435167	0.0542748	0.0187254	0.00995661	0.070638	0.0603569	0.0440627	0.0459972	0.0147104	-0.00309482
dve-1	-0.0170005	-0.0426362	-0.0756254	0.0258155	0.00183335	0.0708179	0.0998411	-0.0476506	-0.0811732	-0.0446125	-0.0363348	-0.0343424	-0.00862148	0.00842328	0.0395736	0.0243602	0.00268025	0.00898731	0.212767	-0.0140242	-0.0605953	0.0117022	0.0274797	0.0085668	-0.0226349	0.039821	-0.040176	-0.023854	0.0727174	-0.0168603	0.00299131	0.0263243	-0.0287279	-0.0389583	0.00765542	0.161336	-0.0120155	-0.0257861	-0.00364773	0.173457	-0.081667	-0.0286866	-0.0254393	0.227959	-0.0246915	-0.0443101	0.0852624	0.0242825	0.00829021
efl-1	0.0896878	0.0218657	0.415921	0.0192848	0.0637625	-0.00181874	0.18678	0.0349453	0.455477	-0.0185313	0.123745	0.0252834	0.0977311	0.0235471	-0.023376	-0.0198653	0.0771157	0.101756	0.0347098	0.0721198	0.218634	0.184666	0.109659	0.0601061	0.0824617	0.0347357	0.187202	0.220335	0.0637136	0.0277581	0.0100859	0.000238419	0.107781	0.0804215	0.144165	0.00854429	0.215883	0.158608	0.0100859	0.0722311	0.181571	0.0161535	0.02806	0.0674467	0.0549018	0.223221	-0.0329099	0.0113604	-0.00199231
egl-18	0.0359432	0.117491	0.0625231	0.00954308	0.0373556	-0.00666095	0.00491462	0.106143	0.063153	0.101702	0.15046	0.123366	0.0391962	-0.00416484	0.0806335	0.0108602	-0.00845699	0.0114125	-0.00802859	0.116815	0.0725011	0.0927179	0.100231	0.0247975	0.120631	0.112481	0.09055	0.104553	0.0338946	0.086499	0.0242507	0.0164765	0.0869684	0.125858	0.108819	0.00323998	0.0387315	0.0699661	-0.002045	0.00293007	0.0815401	0.139582	0.108442	0.025686	0.114622	0.0990925	0.0305106	0.0214896	-0.00256382
egl-27	-0.00306489	-0.00311154	-0.0049577	-0.00102466	-0.00095266	-0.00102466	-0.00266926	-0.00268041	-0.00517241	-0.00237861	-0.00210015	-0.00231588	-0.00257568	-0.000640681	-0.00260721	-0.00158	-0.00130095	-0.000945162	-0.00454988	-0.00248191	-0.00415866	-0.00432202	-0.00332256	-0.000824676	-0.0012899	-0.00219215	-0.00267484	-0.00328081	-0.00197494	-0.0020223	-0.000314585	-0.00077129	-0.00208969	-0.00227748	-0.00342506	-0.00255834	-0.00195644	-0.00296716	-0.000314585	-0.00281104	-0.00413935	-0.00187687	-0.00134957	0.0109591	-0.00311398	-0.00295953	0.0267401	-0.00247594	-0.000394395
egl-43	0.182714	0.16928	0.107428	0.0285095	0.0431571	0.00450554	0.0234218	0.177805	0.0273404	0.0954282	0.091967	0.140747	0.110628	0.0404685	0.0985549	0.0403654	-0.0200181	0.0827941	-0.0408753	0.13078	0.157721	0.102791	0.123968	0.0401514	0.0566801	0.114731	0.078427	0.077424	0.0615409	0.115278	0.0134904	0.0131785	0.0525868	0.122537	0.181286	0.0175475	0.0532763	0.0341707	0.0134904	0.0171812	0.0637701	0.0899334	0.0931237	0.0461475	0.120141	0.0804954	0.0570831	0.0617074	0.0235724
egl-44	0.187863	0.130384	0.15568	0.00550703	0.0131122	0.0584065	0.0581571	0.192175	0.0844039	0.0802607	0.166929	0.154955	0.0899688	0.0441611	0.0776968	0.00471619	-0.013157	0.133729	0.0601454	0.195251	0.173647	0.164858	0.201648	0.103242	0.0838273	0.163379	0.144989	0.175718	0.09653	0.131355	0.0139874	-0.00780038	0.0471448	0.155816	0.217184	0.157925	0.106185	0.0677449	-0.00318153	0.0546362	0.142793	0.120927	0.0951071	0.114301	0.144618	0.169816	0.0956381	0.0195776	-0.00398868
egrh-3	0.00700988	0.109272	0.0420777	0.0206538	-0.00308636	-0.00268154	-0.0216566	0.0795245	0.0260827	0.105259	0.0681547	0.0829048	0.051149	0.01065	0.0610669	0.0297401	-0.0141103	0.0256285	-0.0691676	0.0468429	0.0629504	0.02029	0.0213447	0.00185233	0.08607	0.0287164	0.0387488	0.0477321	-0.0144284	0.0707797	0.0032706	-0.00745531	0.0515142	0.0764144	0.0568717	-0.0193919	0.0124018	0.0462488	-0.00619648	-0.0150198	0.0325358	0.0674999	0.108902	-0.0158618	0.0872995	0.0778242	0.0102214	0.031189	0.0224432
ekl-4	0.106625	0.110693	0.28116	0.0520854	0.0990298	0.0246026	0.0875295	0.094894	0.237657	0.0502355	0.298585	0.0705498	0.180062	0.0718235	0.0721803	-0.00547036	0.00601945	0.0814428	0.0350053	0.157765	0.260295	0.370959	0.254948	0.105973	0.1596	0.14193	0.291786	0.321514	0.085054	0.0675407	0.00604662	-0.00795546	0.0991248	0.168667	0.264031	0.0736477	0.262769	0.130106	0.00604662	0.0404534	0.303426	0.119091	0.108899	0.12267	0.149048	0.32646	0.0296482	0.0177869	-0.00639771
ets-4	-2.38164e-05	0.00423076	-0.0151674	0.0213806	0.0163124	0.0358196	0.0371583	-0.00267261	-0.020599	0.0110693	0.0203007	0.00902193	0.0192719	0.0183496	0.0186028	0.00726873	-0.00951891	0.0400171	0.099373	0.0304423	-0.0058964	0.0395374	0.0542217	0.0477127	-0.00368992	0.0558228	0.00588808	0.0320788	0.0423349	-0.00369807	-0.00230179	-0.00564347	-0.0117061	0.0196189	0.0423269	0.235073	0.00860761	-0.0191449	-0.00230179	0.0631055	-0.00375982	0.00615679	-0.00987469	0.101853	0.0213611	0.00149121	0.0995592	0.00319612	-0.00288575
fkh-10	-0.0192682	-0.0218191	-0.041743	-0.00917947	0.00423194	-0.00917947	-0.0215815	-0.0193684	-0.0411791	-0.0135027	-0.0188143	-0.0154077	-0.013428	-0.00573958	0.0362401	0.156199	-0.0116546	-0.00846729	-0.0235321	-0.019736	-0.026391	-0.0312154	-0.0240662	0.00734717	-0.0115556	-0.0140095	-0.0193094	-0.0255474	-0.00212452	0.00318309	0.0164535	0.0245902	-0.0187206	-0.0204029	-0.0140562	-0.0010745	-0.0175269	-0.0202511	-0.00281822	-0.00964307	-0.0324073	-0.0135423	-0.0120902	0.0098975	-0.0137767	-0.0265131	0.0294828	0.115546	0.0272171
fkh-3	0.0683257	0.0530988	0.0301733	0.0507142	0.0697713	0.00973681	0.0219586	0.0591803	0.0306304	0.0447659	0.0796871	0.0464052	0.12883	0.0847199	0.0448574	0.0117643	-0.00497992	0.0703785	0.018912	0.0709594	0.0590579	0.124995	0.114013	0.0985309	0.0168131	0.0757758	0.0700428	0.0670239	0.0354147	0.0412562	-0.00120421	0.0151628	0.0462476	0.122335	0.0931359	0.0572071	0.173216	0.0177659	-0.00120421	0.0147732	0.0630238	0.0680771	0.0260359	0.0461912	0.0716028	0.11518	0.00587148	0.0193241	-0.00150971
fos-1	-0.00237393	-0.00241006	-0.00384001	-0.000793655	-0.000737888	-0.000793655	-0.00206749	-0.00207612	-0.00400632	-0.00184237	-0.00162668	-0.00179378	-0.00199501	-0.000496243	-0.00201943	-0.0012238	-0.00100765	-0.000732081	0.0289978	-0.00192238	-0.00322111	0.0136499	0.0189433	-0.000638757	-0.000999098	-0.00169794	-0.00207181	0.0192277	-0.0015297	-0.00156638	-0.000243663	-0.000597407	-0.00161858	-0.00176404	-0.0026529	0.0255091	-0.00151537	-0.00229823	-0.000243663	-0.00217731	-0.00320615	-0.00145374	-0.00104532	0.00616853	0.0204348	-0.00229232	0.0167854	-0.00191776	-0.000305481
gei-17	0.0534351	0.0379713	0.0106358	0.0788377	0.062931	0.0578485	0.0196272	0.00712952	0.0015101	0.0065126	0.036171	0.0120221	0.0681162	0.0805197	0.117587	-0.0010505	0.0100722	0.0407606	0.0711555	0.0626669	0.0258579	0.10307	0.094202	0.021923	0.0102675	0.0984856	0.0318707	0.0617394	0.0671763	0.0167868	-0.0015716	-0.0038532	0.0103998	-0.00658303	0.0449291	0.0858845	0.0346547	-0.00363505	-0.0015716	0.0212691	0.0068646	0.0426661	-0.00674217	0.069954	0.0379202	0.0188606	0.0245323	0.0141855	-0.00197031
gei-8	0.0623517	0.0608433	0.029561	0.0296997	0.0727721	0.103715	0.0332692	0.0590338	-0.00313321	0.0187139	0.0398715	0.0433819	0.0868427	0.0662851	0.0794649	0.0418178	-0.00927834	0.0574137	0.0588192	0.0601545	0.0515963	0.0907674	0.101808	0.076771	0.0261589	0.0720731	0.0418266	0.0700358	0.102349	0.0235061	-0.00224362	0.0141314	0.0108168	0.054771	0.0907169	0.1179	0.0643821	-0.00538031	0.0458007	0.0242268	0.0190429	0.0396311	-0.00962512	0.0980751	0.050708	0.0421709	0.0947843	0.0291623	-0.00281282
hif-1	-0.00828097	-0.0059178	-0.023303	-0.00522402	0.0197021	0.0732413	0.0677405	-0.0179441	-0.0315833	-0.00570611	-0.0185412	-0.00712644	0.00342888	0.018496	0.0912166	0.138234	0.0107576	0.00076888	0.0845166	0.000446882	-0.0142857	0.00855242	0.0122663	-0.00396524	-0.00300744	0.0251024	-0.0136183	-0.00249867	0.051598	0.0234036	-0.00488884	0.144109	0.0100189	-0.0109507	0.0200131	0.110405	0.00545622	0.00331907	-0.00488884	0.141664	-0.0409259	-0.00951572	0.00890031	0.171542	-0.00962145	0.0124506	0.108436	0.111934	0.0400468
hlh-11	-0.0416447	-0.0415652	-0.113003	0.012722	-0.0126686	0.0617415	0.0309252	-0.0535442	-0.125314	-0.0412977	-0.0482407	-0.0476569	-0.030718	0.0117171	0.0579972	0.0897788	-0.0182193	-0.00373914	0.121857	-0.0334689	-0.0878638	-0.0287165	-0.00477998	-1.86231e-05	-0.0285206	0.00506224	-0.0586435	-0.0464055	0.0318289	-0.0103449	-0.0111439	0.0324883	-0.0302225	-0.0457397	-0.017617	0.156234	-0.0371391	-0.0500621	0.0143116	0.139404	-0.114726	-0.0437982	-0.0254119	0.206136	-0.0330423	-0.0685177	0.174913	0.0619621	0.00633753
hlh-12	0.0508199	0.0145993	0.0419088	-0.00102466	-0.00095266	-0.00102466	0.0586923	0.0788126	0.00614194	-0.00237861	0.023638	0.0211069	-0.00257568	-0.000640681	-0.00260721	-0.00158	-0.00130095	0.0555005	-0.00454988	0.0632783	0.0366939	0.0220118	0.0300129	0.0638161	0.0401897	-0.00219215	0.038152	0.0304452	-0.00197494	0.051372	-0.000314585	-0.00077129	-0.00208969	0.0215247	0.0289936	0.018737	0.0256126	0.0155463	-0.000314585	0.0166664	0.00953395	0.0268285	-0.00134957	0.0199446	0.014584	0.0341569	0.0267401	-0.00247594	-0.000394395
hlh-26	0.0287886	0.00226621	0.0127136	-0.00210082	0.0527248	-0.00210082	-0.00547269	0.00444983	0.0114879	0.0397014	0.0208226	0.0181198	0.0463635	0.0392624	0.0150747	0.0133428	-0.00266728	-0.00193783	0.0091186	0.00561188	0.0313586	0.0297039	0.0501433	0.061419	0.017604	0.00756002	0.0343758	0.0262007	-0.00404915	0.00888619	-0.000644981	-0.00158135	0.00834065	0.0418075	0.040454	0.0259412	0.0767369	0.0210291	-0.000644981	0.00374471	0.0182121	0.0241774	0.0165977	0.0251009	0.0195337	0.0482882	-0.00753275	0.00564874	-0.000808613
hlh-30	-0.0240966	-0.0387119	-0.0674055	0.0123819	-0.0114962	0.048186	0.0915117	-0.0355372	-0.07614	-0.040702	-0.0475844	-0.0341017	-0.0398497	0.000249362	0.0669386	0.0992059	0.0177654	-0.00199275	0.140704	-0.0204241	-0.0604377	-0.0331926	-0.0170163	-0.0151782	-0.0233214	0.00673974	-0.0559014	-0.0331147	0.0501615	0.000824324	0.0038938	0.051445	-0.0335817	-0.0409549	-0.00881269	0.106442	-0.0351726	-0.00465204	0.0107294	0.171692	-0.0976969	-0.0386055	-0.0194933	0.233597	-0.035968	-0.0582215	0.155081	0.099799	0.0150096
hmg-1.1	0.0720691	0.0594337	0.0293514	0.0289342	0.0122477	0.0347312	0.0721909	0.0397382	0.00433542	-0.00276211	0.00413309	0.03743	0.0136163	0.0104046	0.12745	0.185978	0.0107898	0.0377659	0.0274176	0.040979	0.0401828	0.0167621	0.0490336	-0.00198519	0.0505515	0.0512818	-0.00199064	0.0183722	0.0383098	0.0816539	0.00316247	0.0500392	0.0218296	0.0263005	0.0988489	0.0214871	-0.00662696	0.0513121	-0.00624494	0.153346	-0.0243551	0.0218339	0.0526637	0.158262	0.0307417	0.0331443	0.128432	0.184323	0.0372026
hmg-20	0.15608	0.147879	0.164958	0.0491692	0.0538386	0.00123248	0.054543	0.129171	0.118583	0.0928492	0.199295	0.135594	0.0868506	0.0340165	0.101486	-2.76919e-07	-0.00227105	0.114956	0.0124948	0.215584	0.168881	0.18352	0.192804	0.0441275	0.137801	0.167319	0.145149	0.167148	0.0917123	0.154527	0.0497862	-0.00508616	0.0972742	0.182094	0.216053	0.0484453	0.101252	0.099679	-0.00207448	0.00834607	0.180297	0.168113	0.118854	0.0708904	0.136884	0.20532	0.0737208	0.0173661	-0.00260078
hsf-1	0.0816033	0.0777776	0.325665	0.0280479	0.0763699	0.00625476	0.0821999	0.0826993	0.306801	0.0467467	0.26324	0.0908199	0.138989	0.0578797	0.0450345	-0.00440064	0.000899352	0.0806178	0.0112739	0.138214	0.24493	0.295869	0.1975	0.0776988	0.169868	0.125375	0.274585	0.308102	0.0554719	0.0445548	0.00437815	-0.00165274	0.110335	0.157682	0.210819	0.0463313	0.219753	0.116369	0.00437815	0.0268171	0.285	0.0927776	0.072629	0.0710438	0.146381	0.293256	-0.00599035	0.0127007	0.000882337
2024-06-01	0.00121406	0.00971177	-0.0140004	0.00894346	0.02424	0.0219938	0.00467265	-0.00563957	-0.0178968	-0.00953347	-0.00841739	0.00832016	-0.00502305	-0.00256785	0.015747	-0.00633263	-0.00521419	0.0103514	0.0511827	0.0175074	-0.0166679	0.0156605	0.0326111	0.0128872	-0.00516991	0.0407004	0.00461993	0.00374725	0.0399868	-0.00810537	-0.00126086	-0.00309133	-0.00189688	0.00279676	0.0187559	0.0911014	0.00597064	-0.0118924	-0.00126086	0.0521618	-0.0131653	0.0140496	0.00452799	0.0574293	-0.00361416	-0.0118618	0.0386056	0.00108364	-0.00158073
lag-1	0.0217628	0.0836499	0.0395571	-0.00466281	0.00803637	-0.00466281	-0.00762843	0.0733122	0.0364473	0.0849961	0.0757273	0.0929444	0.0209974	0.0154461	0.0805415	-0.00718992	-0.00592008	0.033106	-0.0067918	0.0807076	0.0352223	0.0443216	0.0695652	0.0105266	0.0674338	0.0882134	0.0329217	0.0483968	0.00911677	0.108747	0.0359197	-0.00350983	0.0590483	0.0790216	0.0667697	-0.011642	0.0215473	0.0396635	-0.00143155	-0.0084893	0.0476138	0.0929167	0.0551994	0.0117601	0.06402	0.0275279	0.020233	0.00329301	-0.00179473
let-526	0.0418679	0.114258	0.0662262	-0.000763807	0.0153308	0.0411683	0.0456565	0.0835751	0.0564868	0.0830682	0.11186	0.0893098	0.0855336	0.0509048	0.145814	0.0108302	-0.00984285	0.0231372	0.0602032	0.122367	0.0891018	0.145697	0.11349	0.0111034	0.146043	0.155671	0.097514	0.122216	0.0583509	0.110047	-0.00238012	0.0127018	0.109088	0.091331	0.102378	0.0634886	0.0369741	0.0744087	0.0203022	0.030989	0.0567255	0.109024	0.144112	0.0988268	0.0903984	0.087148	0.070122	0.0284238	-0.00298396
let-607	0.0279295	0.00840223	-0.00147651	0.0226098	0.0103063	0.0905441	0.0771008	0.000652343	-0.00779999	-0.00722659	0.000695159	0.0245089	0.0345165	0.00838284	0.0431823	-0.00485678	0.0123982	0.0473563	0.176008	0.0235328	-0.000433061	0.0587918	0.0718461	0.0209634	0.00115688	0.0654042	-0.00302881	0.0264622	0.0773445	0.0198578	-0.00348684	0.00432202	0.00333601	-0.00750753	0.0254475	0.261235	0.0245361	0.00849758	0.0122621	0.11942	-0.0178619	0.00326011	-0.000179126	0.135698	0.0132893	-0.00168923	0.099503	0.00734533	-0.00437145
lim-7	0.341049	0.211448	0.213443	0.0339292	0.0385108	0.00995429	0.0685856	0.291474	0.0810909	0.0830215	0.156829	0.212638	0.0929636	0.042236	0.078224	0.0148563	-0.00518196	0.142924	0.00344034	0.228316	0.219878	0.140821	0.226838	0.0829164	0.0714312	0.201074	0.105878	0.159463	0.111266	0.164809	-0.00430453	0.0106439	0.0805075	0.189737	0.26892	0.0270608	0.0789562	0.0687381	0.00866421	0.0257743	0.15101	0.135042	0.0880242	0.0556757	0.16372	0.147394	0.0582003	0.0149899	0.00494999
lin-1	0.117571	0.0905902	0.0603458	0.0330013	0.0290808	0.0526895	0.0602731	0.10439	-9.96452e-05	0.0290395	0.101131	0.0881766	0.0393437	0.0287847	0.0791429	0.00370134	-0.0118748	0.0849806	0.145226	0.132818	0.0862593	0.104099	0.164177	0.0667026	0.0416287	0.156156	0.0569173	0.0729063	0.0799023	0.0949637	-0.00437499	0.0101624	0.0256718	0.0942588	0.149615	0.25736	0.0457221	0.0231028	0.0211847	0.0772067	0.0385453	0.0433261	0.0381985	0.151731	0.0944718	0.0836794	0.174185	0.00542065	0.0251027
lin-13	0.0794281	0.0418755	0.0707769	0.0311373	0.0346737	0.0574068	0.0996503	0.0477178	0.05811	0.00958902	0.0155018	0.034464	0.064573	0.0262657	0.0580638	0.0172278	0.0102445	0.049299	0.0760332	0.0711634	0.0625797	0.0696996	0.0761498	0.0259412	0.00528007	0.057024	0.0195929	0.0628126	0.0977094	0.0341661	0.0187768	0.0286168	0.0157432	0.0146312	0.0847515	0.073317	0.0745749	0.0250715	0.0187768	0.11973	0.0321034	0.00656935	0.0241166	0.112204	0.0596551	0.0392881	0.0547066	0.0437254	-0.00318192
lin-15B	-0.00137052	-0.00139138	-0.00221691	-0.000458193	-0.000425997	-0.000458193	-0.0011936	-0.00119859	-0.00231293	-0.00106363	-0.000939115	-0.00103558	-0.00115176	-0.000286491	-0.00116586	-0.000706521	-0.000581739	-0.000422645	-0.00203455	-0.00110983	-0.00185961	0.0275063	0.0357805	-0.000368767	-0.000576799	-0.000980257	-0.0011961	-0.00146707	-0.000883128	-0.000904303	-0.000140672	-0.000344895	-0.000934439	-0.00101841	-0.00153157	-0.001144	-0.000874855	-0.00132681	-0.000140672	-0.001257	-0.00185098	-0.000839271	-0.000603482	-0.00313546	0.0381771	-0.0013234	-0.00164291	-0.00110716	-0.00017636
lin-26	0.336311	0.176073	0.258317	0.0396127	0.0486394	0.0457716	0.0849749	0.222731	0.140693	0.0735371	0.20469	0.166353	0.143856	0.0373171	0.0891484	0.0150353	-0.00940471	0.142722	-0.000518337	0.214663	0.233204	0.230055	0.245132	0.0841353	0.113516	0.153706	0.201651	0.207627	0.121826	0.114199	0.0141876	0.0102802	0.0807036	0.174669	0.277931	0.0484848	0.154583	0.0612782	-0.0058017	0.0425658	0.222706	0.107916	0.104077	0.104384	0.157027	0.214179	0.0688736	0.0491414	0.000700231
lin-29	0.0568492	0.104635	0.0482818	0.0120882	-0.00554623	0.021115	0.0163561	0.0902967	0.0267394	0.0810888	0.0502079	0.0920367	0.0180003	0.0250745	0.129782	0.0143446	-0.000447038	0.0238383	0.0084323	0.0918965	0.0725282	0.0797832	0.0875126	0.0399998	0.085923	0.102762	0.0304087	0.0422582	0.0405694	0.0946197	0.0274657	-0.00449032	0.0550521	0.0774729	0.120489	0.022004	0.00771731	0.0500898	-0.00183146	0.0106333	0.030392	0.0835745	0.0883705	0.0401372	0.0769325	0.0728058	0.0787369	0.0160399	0.0444509
lin-38	0.155762	0.0884831	0.314978	0.0523365	0.0928442	0.0266396	0.171562	0.0753038	0.274708	0.0190106	0.156834	0.0700596	0.117865	0.0389696	0.0633098	-0.00673863	0.0559802	0.0762547	0.0796602	0.137846	0.245435	0.252973	0.185705	0.0854436	0.125856	0.103709	0.190159	0.223284	0.0739579	0.060261	0.00684678	-0.00490058	0.0781186	0.106288	0.248883	0.0593642	0.193047	0.132415	-0.00831706	0.138788	0.193446	0.0494916	0.072826	0.142191	0.0978174	0.278755	0.0153782	0.0103991	0.00167075
lin-39	-0.00628383	-0.00637948	-0.00444503	-0.00210082	0.0253858	-0.00210082	-0.00547269	-0.00549554	-0.00508161	-0.00487678	-0.00430585	-0.00474816	0.00504803	-0.00131356	0.0048646	0.0133428	-0.00266728	-0.00193783	-0.00317943	0.00561188	-0.00187884	0.00399381	0.00132436	0.0298641	-0.00264463	0.00756002	0.00448085	0.00150529	-0.00404915	0.00888619	-0.000644981	-0.00158135	0.00834065	-0.00466943	-0.00702226	0.0259412	-0.00401122	0.0119916	-0.000644981	-0.00576338	-0.00848675	0.0101647	-0.00276697	0.00755554	-0.00638448	-0.0060678	0.0518548	-0.00507634	-0.000808613
lin-40	0.0280996	0.00919623	-0.0315945	0.0401656	0.0463952	0.12144	0.0678217	-0.0113133	-0.0417706	-0.0157908	-0.0105893	-0.00985592	0.0411611	0.0466679	0.149219	0.108937	0.00182899	0.0236026	0.178094	0.0101946	-0.00490045	0.0736612	0.0772751	0.0258761	0.0087921	0.0617746	-0.00154717	0.0194169	0.115004	0.0215445	0.0107867	0.0515975	0.000564505	-0.0120882	0.0642165	0.154009	0.0351342	0.00326541	0.00199394	0.163092	-0.0389762	0.00720472	-0.000286863	0.230682	0.0155302	-0.000267174	0.158627	0.106442	0.0265511
lin-54	0.0895055	0.0418788	0.392762	0.034797	0.0704254	0.019122	0.194287	0.038656	0.402286	-0.0017264	0.172726	0.0413519	0.125392	0.0434547	0.0171218	0.00213845	0.0482937	0.0916313	0.0664301	0.0884202	0.240413	0.244456	0.14764	0.0901381	0.111502	0.0852482	0.193707	0.266508	0.0547613	0.042212	0.0248455	-0.00145075	0.0727738	0.0963885	0.175195	0.0986213	0.240075	0.153652	-0.00567916	0.111	0.214901	0.0403946	0.0544116	0.131336	0.0875582	0.252565	0.00413597	0.0293399	0.000997658
lir-1	0.0378448	0.0543725	0.16579	0.00238341	0.0220221	0.0196416	0.112469	0.0376544	0.146507	0.0460042	0.0639353	0.0324395	0.0298607	0.0236302	0.0915028	-0.00400421	0.00569598	0.0222871	0.0160812	0.0574865	0.148328	0.15249	0.0625707	0.0163869	0.266957	0.0725317	0.176423	0.217417	0.0648843	0.0540032	-0.00191751	0.0181871	0.150046	0.0610251	0.0838317	0.0514239	0.125067	0.150571	-0.00191751	0.0280318	0.119715	0.0265968	0.162609	0.0614421	0.0513728	0.181764	0.0556889	0.0322164	-0.00240398
lir-3	0.166774	0.0770054	0.0919382	0.0126816	0.0830126	0.0287035	0.0542022	0.12284	0.0214141	0.00628808	0.0327312	0.100502	0.0501682	0.0490373	0.0107978	-0.00515067	-0.00424099	0.170512	0.0200327	0.0862874	0.0869535	0.0264041	0.0968147	0.0967099	0.0213083	0.0839861	0.02267	0.0256072	0.0523718	0.0919329	-0.00102552	0.0187345	0.025003	0.0364964	0.10349	0.0113075	0.0784079	0.0415701	-0.00102552	0.0387571	0.0453773	0.0645061	0.0200001	0.0268831	0.0606055	0.0417187	0.0534979	0.0189559	0.0402007
lsl-1	0.037897	0.00347531	0.449777	-0.00376436	0.0151592	-0.0129389	0.18209	-0.00320486	0.594547	-0.0174313	0.0803028	0.00505572	0.0340767	0.0173613	-0.0251577	-0.0174185	0.0723867	0.0354384	0.00190037	0.0156083	0.194449	0.111309	0.0419242	0.0415816	0.0928883	0.0012708	0.137192	0.191409	0.0177956	0.00313833	0.0140009	-0.00623169	0.0841113	0.0484662	0.0847416	-0.00757431	0.170765	0.130659	-0.00585022	0.0494829	0.139736	0.00553778	0.0354468	0.0209847	0.00234641	0.187898	-0.046008	0.000385019	-0.00733442
lsy-2	-0.0245518	-0.0213989	0.0331195	0.022647	0.0285377	0.0495188	0.146379	-0.0395836	0.0590757	-0.0316614	-0.0171062	-0.0229365	0.00476749	0.0105392	0.0722154	0.129256	0.0835851	0.00492265	0.185355	-0.00205911	0.0192623	0.0356171	0.0282219	0.0212307	0.0100293	0.0284845	0.00188381	0.0228515	0.0700228	0.00616105	0.0202119	0.0554947	-0.00104478	-0.0242393	0.0463716	0.0917977	0.0361472	0.074796	-0.00885961	0.185392	-0.0483995	-0.0220114	-0.0056106	0.238579	-0.0146693	0.0195544	0.116156	0.100257	0.023683
lsy-27	0.0841905	0.0279401	0.0719509	-0.00165256	-0.00153644	-0.00165256	0.0591332	0.0209523	0.0337681	-0.00383621	0.0285439	0.0107942	0.0352208	-0.00103329	0.00876911	-0.00254821	-0.00209816	0.0685028	0.000475578	0.0231915	0.0608691	0.0338671	0.0566759	0.038767	-0.00208034	0.0577355	0.0463363	0.0260894	0.0476516	0.0298593	-0.000507361	-0.00124393	0.0447581	0.0258562	0.0648593	-0.00412608	0.0139459	0.00669861	-0.000507361	0.0196304	0.0611771	-0.003027	-0.00217658	0.00541257	0.0279122	0.0412739	0.0129406	0.0368921	-0.000636078
madf-10	0.158009	0.0876662	0.0785992	0.0499682	0.0498435	0.0955776	0.116994	0.0964855	0.0167968	0.012579	0.0203354	0.0689061	0.0921171	0.0498181	0.0782032	0.052669	0.00223577	0.149228	0.147896	0.110198	0.0685813	0.134852	0.191825	0.073015	0.0105579	0.142544	0.0471478	0.0817421	0.165114	0.0642967	-0.0033294	0.00527904	0.0131048	0.0546183	0.130887	0.248433	0.0651105	0.0118186	-0.0033294	0.125612	0.0439756	0.0359824	0.0204459	0.18189	0.0755016	0.0463033	0.11348	0.0507341	0.0220701
madf-3	0.0684192	0.0962175	0.225758	0.0320495	0.107898	0.0089617	0.0685631	0.0937213	0.205014	0.0650626	0.255964	0.107425	0.158475	0.0522536	0.0721904	-0.0118139	0.0143341	0.0625462	0.0127438	0.168734	0.207748	0.299122	0.194646	0.071917	0.159264	0.130003	0.264684	0.291179	0.0753752	0.061952	0.00535523	6.97577e-06	0.105278	0.181281	0.187022	0.0603074	0.193632	0.112464	0.00535523	0.0335839	0.23259	0.142548	0.0950882	0.0895388	0.142006	0.256327	0.0116551	0.0079707	0.00183364
madf-5	0.224917	0.214539	0.150299	0.0286627	0.0325845	0.0241227	0.071608	0.245062	0.0715369	0.101004	0.170138	0.19084	0.0910367	0.035835	0.0983753	-0.00992772	-0.0154866	0.151076	0.00291919	0.249351	0.189024	0.147058	0.20302	0.080314	0.103933	0.199862	0.101579	0.119656	0.0955233	0.194622	0.0109902	0.00888196	0.0607695	0.180315	0.230443	0.0270751	0.0872265	0.0614812	-0.00374486	0.0208532	0.134227	0.172779	0.111843	0.0590449	0.154177	0.147521	0.059632	0.0317945	-0.00469493
madf-6	0.114012	0.0729733	0.456936	0.0329218	0.0692865	0.00509093	0.139928	0.0762169	0.511553	0.0106368	0.191378	0.0590771	0.112032	0.0383863	0.018792	-0.0165089	0.0476384	0.0652076	-0.00100691	0.113237	0.258677	0.257316	0.159796	0.0614171	0.12988	0.0920327	0.233872	0.256911	0.0518184	0.0529298	0.0141762	-0.00830506	0.132985	0.146832	0.222381	0.0150681	0.203005	0.128412	0.00664897	0.0428148	0.233316	0.0597501	0.0698982	0.068255	0.101158	0.273696	-0.0277624	0.00426543	-0.010538
madf-8	0.0133312	0.0214043	0.469543	-0.00180359	0.00420317	-0.0124552	0.135341	0.0108932	0.549196	0.0173016	0.0952453	0.0133106	0.0160056	0.0126518	-0.00366455	-0.00847494	0.0413498	0.0198584	-0.0178463	0.0284571	0.183762	0.120934	0.0435195	0.0135508	0.157949	0.0246607	0.173858	0.233769	0.000800857	0.0375509	0.00660959	-0.00733915	0.180634	0.0860883	0.0779592	-0.0196441	0.129146	0.15553	-0.004914	0.022462	0.14408	0.0371981	0.0843572	0.00376195	0.0309645	0.216847	-0.0273351	-0.00423671	-0.00616069
madf-9	0.19988	0.182756	0.147195	0.0357214	0.0215161	0.0413909	0.0617122	0.183207	0.0547945	0.0695602	0.0838888	0.171948	0.060979	0.0392041	0.11433	0.00732421	0.00567255	0.144681	0.0189059	0.196126	0.153549	0.102652	0.144705	0.055557	0.100723	0.164813	0.0437162	0.0902703	0.127103	0.19598	0.0154428	0.0153051	0.0844888	0.1081	0.20417	0.0477869	0.0446089	0.0708234	0.0338435	0.0392781	0.0711918	0.129175	0.112503	0.0651027	0.10554	0.125663	0.102813	0.0364936	0.069693
mcd-1	0.0872756	0.0951421	0.274177	0.0210206	0.0345397	0.0156159	0.153257	0.0602431	0.244093	0.0632951	0.125353	0.0603489	0.0956137	0.0292244	0.105122	0.046795	0.022998	0.0497767	0.0124249	0.0917256	0.203676	0.178118	0.121625	0.0357673	0.131251	0.077998	0.144248	0.185154	0.0464516	0.0780161	-0.0068209	0.0119483	0.0995763	0.111124	0.168729	0.0317944	0.149206	0.12965	0.0107204	0.144146	0.134373	0.0575785	0.106545	0.123426	0.0894628	0.258315	0.0457595	0.0625593	0.00544326
mdl-1	-0.0425925	-0.0304013	-0.0703824	0.010639	-0.0148407	0.0587657	0.0450141	-0.0343856	-0.068083	-0.0214016	-0.0309285	-0.0331188	-0.0329854	-0.00735609	0.0712948	0.11908	-0.00805825	-0.0179319	0.0896788	-0.0306349	-0.0592436	-0.023462	-0.021656	-0.015646	-0.0172877	-0.00309508	-0.0377833	-0.0174583	0.0287758	-0.00291526	-0.00596841	0.0611618	-0.0217276	-0.0308408	-0.0116363	0.122367	-0.0307513	-0.0327779	0.0135565	0.127724	-0.0690597	-0.0289791	-0.0141527	0.168907	-0.0294466	-0.0465057	0.153309	0.111589	0.0236716
mel-28	0.00756495	-0.0046159	0.00054597	-0.00152006	0.036351	-0.00152006	-0.00395979	-0.00397632	-0.00767315	-0.00352861	-0.00311552	-0.00343555	0.0389817	-0.000950435	0.0384427	-0.00234389	-0.00192992	0.0366596	-0.00674964	-0.00368186	0.0213779	0.0202241	0.0400278	-0.00122339	0.0260565	0.0300505	0.0373267	0.0519873	0.0339118	-0.00300003	-0.000466679	-0.00114419	0.0143394	0.0126714	0.0277093	0.0105644	0.0156876	0.00808208	-0.000466679	0.0089637	0.0122994	0.0359282	-0.00200205	0.032011	-0.00461952	0.00812354	0.00480388	-0.00367301	-0.000585075
mep-1	0.00541824	-0.0107748	-0.037835	0.0526264	0.0298765	0.0592725	0.123612	-0.0334372	-0.0403415	-0.0098641	-0.0196429	-0.00854696	0.0252168	0.0276034	0.0827656	0.128094	0.0187171	0.0305414	0.178778	0.000702706	-0.0270132	0.0531673	0.0586606	0.0176165	-0.0122427	0.0422341	-0.00454675	0.012897	0.084008	0.00339473	-0.00181816	0.0454895	-0.0224468	-0.0247303	0.0556315	0.122341	0.0225228	0.0126545	0.00537192	0.193656	-0.0563179	-0.0134631	-0.018403	0.269954	0.000387011	-0.0153009	0.132116	0.124362	0.0345969
mxl-1	0.199329	0.0637631	0.130628	0.0277424	0.0470793	0.0121543	0.0950958	0.179992	0.0300619	0.0193527	0.0545714	0.132407	0.0166924	-0.00214704	0.0100373	-0.00529487	-0.00435971	0.233283	0.0035975	0.109741	0.1083	0.028853	0.108558	0.0746019	0.0204998	0.0591523	0.0460078	0.0545987	0.0914689	0.113045	-0.00105423	-0.00258474	0.000735507	0.0849529	0.138873	0.00417022	0.0924317	0.0232934	-0.00105423	0.0546868	0.0843178	0.0538335	0.0192163	0.0410278	0.0637009	0.0733749	0.0468396	0.024572	-0.00132169
mxl-2	0.0599642	0.0958934	0.0368335	0.0175814	0.00616655	0.0565104	0.0316864	0.112578	0.015515	0.0601776	0.0693887	0.0977628	0.0316597	0.0361732	0.0854973	0.0124748	-0.0106285	0.0414865	0.053816	0.129869	0.0542128	0.0827563	0.0974035	0.0415648	0.0411205	0.123558	0.0289929	0.053001	0.0451047	0.0798995	-0.00257011	0.00230353	0.0441255	0.067359	0.0870847	0.0957924	0.00805033	0.038012	-0.00257011	0.0182716	0.0291886	0.0847657	0.0680203	0.0501436	0.100193	0.0382247	0.112026	0.0126065	-0.00322214
mxl-3	-0.0198519	-0.0214057	-0.0690643	0.0101258	-0.0164636	0.0440563	0.0319435	-0.0228075	-0.0733452	-0.00780623	-0.0276289	-0.00545997	-0.0125368	0.00492909	0.0556016	0.0450873	-0.00877418	0.00515882	0.063412	-0.0246372	-0.0496615	-0.0184483	-0.00650556	-0.00635801	-0.0106483	0.00605094	-0.0370335	-0.0232348	0.0396329	0.00496606	0.00273671	0.0367097	-0.0161109	-0.0117454	-0.00149809	0.10828	-0.0280827	-0.0316052	-0.0064403	0.127449	-0.069158	-0.0212862	-0.00825177	0.125164	-0.0166837	-0.0384293	0.104712	0.0816724	0.0065688
nfya-1	-0.00413641	-0.000908608	-0.00535126	-0.00505627	-0.00470099	-0.00505627	-0.000659573	0.0158533	-0.00937407	0.00222812	0.000133075	0.0124526	0.00886242	-0.0031615	-0.00433582	-0.00779664	0.0103546	-0.00466399	-0.00960925	0.00116185	-0.00663761	0.00552113	-0.00280069	-0.00406944	-0.00636512	-0.00578208	-0.000711816	-0.00587392	-0.00417514	-0.00453543	-0.00155235	-0.003806	0.0107827	0.003322	-0.00698557	-0.00828205	0.00158887	-0.0108667	-0.00155235	-0.00989973	-0.000909261	0.00829827	0.00142926	-0.012614	-0.00814869	0.000532666	-0.015029	-0.00325782	-0.00194618
nfya-2	0.0572088	0.0929044	0.115482	0.0398397	0.0857322	0.000865179	0.0278533	0.0885631	0.102143	0.0863893	0.232261	0.0964843	0.137707	0.0205406	0.0637329	0.00456218	-0.00879823	0.069618	0.00503877	0.117684	0.136912	0.171718	0.147113	0.110484	0.134021	0.13666	0.156006	0.167044	0.0193429	0.0742024	-0.00212752	-0.00521619	0.0942176	0.169788	0.17571	0.0464234	0.209516	0.0796547	-0.00212752	0.00430325	0.170452	0.159106	0.0858389	0.0614783	0.145765	0.171579	0.00928247	0.0128409	-0.00266727
nfyb-1	0.130835	0.113402	0.127528	0.0349736	0.0905466	0.0524174	0.0682012	0.090243	0.0896495	0.0561536	0.159551	0.0940598	0.133262	0.0476307	0.129352	0.0426825	-0.0119572	0.101007	0.0702869	0.146636	0.16929	0.245176	0.223566	0.073873	0.108747	0.181268	0.166961	0.195785	0.095097	0.0791922	0.0126501	-0.00368688	0.0553711	0.131621	0.238911	0.152619	0.152081	0.0673622	0.00321418	0.0617955	0.122631	0.0878302	0.0729276	0.175726	0.14088	0.178632	0.0792431	0.0331792	0.022312
nhr-10	-0.000760243	-0.0110619	-0.0143194	-0.0036428	0.0440187	0.0404553	0.0251371	0.00196757	-0.0151962	-0.00201477	-0.00746631	0.018202	0.00875323	-0.00227771	0.0202379	-0.0056171	0.0185859	-0.00336018	0.0691232	-0.00882353	0.000584341	0.0515063	0.0117022	-0.00293183	0.00711785	0.0200765	0.00776974	0.021642	0.0623499	0.00034316	-0.00111839	-0.00274204	-0.00742914	-0.00809675	0.00611756	0.111076	0.00860196	-0.000101352	-0.00111839	0.0229802	-0.010858	0.00952614	0.00639482	0.063807	0.00890353	-0.00528525	0.0512992	0.00359579	-0.00140213
nhr-102	0.0710097	0.0325578	0.0124606	0.101553	0.0726264	0.101553	0.0558789	0.0113613	-0.021049	0.00885949	0.0378115	0.0290281	0.0918177	0.0629272	0.0738066	-0.00311692	-0.0090356	0.0519747	0.188003	0.0593606	0.033057	0.139585	0.151853	0.0679938	0.00178459	0.0927805	0.0555844	0.0694458	0.118943	0.0147799	0.00538441	0.0132013	0.00226027	0.017201	0.104295	0.232091	0.0839403	0.000131192	-0.00533881	0.0807594	0.0103961	0.019121	-0.00780889	0.171627	0.0470454	0.0415757	0.123781	-0.001612	0.027527
nhr-11	-0.018627	-0.0139315	-0.0399882	2.95488e-05	-0.0097237	0.0157618	0.00775604	-0.0171048	-0.0402664	-0.012788	-0.0110728	-0.023638	-0.0156405	0.00182754	0.0260222	0.113807	-0.004998	-0.00396537	0.000473896	-0.0209197	-0.0259982	-0.014956	-0.0137798	-0.00841738	-0.00481521	-0.00497533	-0.025247	-0.0216049	0.0073403	0.0277306	0.0308291	0.0269019	-0.0109159	-0.00407862	-0.0153797	0.00818464	-0.0144191	-0.0191041	0.0138091	0.0438501	-0.0394972	-0.013378	-0.00978186	0.0604844	-0.0104064	-0.0283395	0.094143	0.0499208	0.00955319
nhr-111	0.0696935	0.0565018	0.0366768	0.0321175	0.0727659	0.0321175	0.00587776	0.0676649	0.0113664	0.000640492	0.0545607	0.0247389	0.078032	-0.00190254	0.0275474	0.0182338	-0.00386324	0.0733837	-0.000759205	0.0813929	0.0565791	0.0582564	0.091375	0.0629902	0.0381614	0.0184891	0.0264995	0.0357808	0.0217908	0.0390395	-0.000934178	-0.00229039	-0.00620547	0.0253651	0.0882863	0.0570779	0.0872218	0.0224257	-0.000934178	-0.00177489	0.0246204	0.0234864	0.0227649	0.0398209	0.0683911	0.0538361	-0.00577867	0.0148894	-0.00117118
nhr-120	0.0947077	0.137771	0.0719949	0.0294393	0.0406255	0.0147228	0.00107037	0.136156	0.0348001	0.0667707	0.101261	0.148797	0.0950826	0.0423634	0.0610548	-0.00174091	-0.00933438	0.0490257	-0.00240048	0.112225	0.0894096	0.0805722	0.117411	0.0214728	0.0551899	0.14471	0.0528884	0.064585	0.0244142	0.0986123	-0.00225717	-0.00553406	0.058064	0.114771	0.105923	0.0147294	0.0365829	0.0362377	-0.00225717	-0.00366326	0.0629993	0.132491	0.0911689	0.027106	0.11514	0.0783703	0.0273352	0.0163695	-0.00282981
nhr-179	0.0625559	0.00386889	0.0289931	-0.00188998	0.0286252	-0.00188998	0.00617274	0.0392659	-0.0095405	0.00799781	0.0100892	0.0338489	0.0182065	-0.00118173	0.0178843	-0.0029143	-0.00239959	0.120744	0.0052748	0.0548802	0.0218793	0.0348863	0.0662094	-0.00152111	-0.00237921	0.0361458	-0.00493374	0.0122449	0.0556375	0.0397195	-0.000580251	-0.00142264	-0.00385443	0.0216246	0.0464438	0.0299393	0.0113475	-0.00547292	-0.000580251	0.0159481	0.022036	-0.00346188	-0.00248928	0.00656514	0.0230596	0.00460897	0.00147306	0.0192711	-0.00072746
nhr-237	0.0245249	-0.00393614	-0.00627155	-0.00129621	-0.00120513	-0.00129621	-0.00337665	0.012717	-0.00654316	0.015041	0.0176927	0.0155892	0.0301995	0.0649074	-0.00329816	0.0248583	0.0308744	-0.00119564	0.0340807	0.0488525	-0.00526075	-0.0054674	0.00897498	0.0500639	-0.00163174	-0.0027731	-0.0033837	0.00918219	0.0191003	-0.00255823	-0.000397953	-0.000975691	-0.00264349	0.0159378	0.0341142	0.0136005	0.041119	0.0108839	-0.000397953	0.0118435	-0.00523633	0.0430166	-0.00170722	0.0195468	0.0100533	-0.00374383	0.00737549	-0.0031321	-0.000498914
nhr-25	-0.00854691	-0.00918284	-0.0362111	0.00391674	0.0122236	0.0227708	-0.015138	-0.00543044	-0.0368535	0.00194652	-0.00531491	-0.00825388	0.00377473	0.0346987	0.0435851	0.0030492	-0.00106191	-0.00798134	0.0147634	-0.00773672	-0.01869	0.00956628	0.00612489	0.00083401	-0.00588856	0.00829896	-0.00534951	-0.00532766	0.0492329	0.00224648	0.017741	0.0268268	-0.00204656	-0.00487516	0.00236391	0.0272064	0.00343361	-0.0116557	-0.00265648	0.00915756	-0.026707	0.0187796	-0.00182545	0.0264218	0.00145903	-0.0115589	0.0460237	0.0612545	-0.00333043
nhr-270	0.0461824	0.00900231	0.0374383	0.0325579	0.13102	0.0325579	0.0270731	0.0129943	0.0388851	0.0163958	0.116832	0.00919199	0.122442	0.083237	0.0209038	0.018552	-0.00381898	0.03576	0.0124417	0.0450899	0.0389227	0.108662	0.104035	0.0858377	0.0103722	0.0441392	0.0618275	0.0536857	0.0408266	-0.00593654	-0.000923477	-0.00226416	0.00269365	0.0583119	0.100604	0.0651799	0.144824	-0.00871022	-0.000923477	-0.00160345	0.0718597	0.0140871	-0.00396172	0.0714302	0.0391872	0.0609938	-0.0107853	0.0227296	-0.00115776
nhr-28	-0.0758003	-0.0779193	-0.136047	-0.0109463	-0.029633	0.0340882	0.0297115	-0.0760773	-0.133144	-0.0518935	-0.0649332	-0.0664247	-0.0620761	-0.0133878	0.0229354	0.00132271	-0.00756794	-0.027212	0.124789	-0.0568625	-0.119585	-0.06941	-0.0459915	-0.0195783	-0.0395871	-0.0184769	-0.0773763	-0.0683818	0.00992583	-0.0377259	0.00153434	0.0323266	-0.0470185	-0.0737497	-0.063798	0.11481	-0.0560316	-0.0657455	0.00153434	0.124876	-0.127006	-0.0580438	-0.0345245	0.12678	-0.0660568	-0.0835133	0.0929551	0.015261	0.00119931
nhr-41	0.141334	0.128325	0.085089	0.0271366	0.00456125	0.0271366	0.0498372	0.141396	0.00414364	0.050356	0.052963	0.136787	0.026258	0.0328254	0.0617219	-0.0060704	-0.0114715	0.0700483	0.0852377	0.140456	0.105153	0.0761647	0.13272	0.022649	0.051026	0.143552	0.0472808	0.0842507	0.0837452	0.130459	-0.00277396	0.0011943	0.0354443	0.0873386	0.129236	0.147477	0.0114609	0.0381074	-0.00277396	0.0676238	0.0426134	0.0731382	0.0799093	0.109737	0.0872296	0.0726907	0.13478	0.0137614	0.0121326
nhr-42	0.0943704	0.12852	0.0522481	0.0504236	0.0338418	0.0351246	0.0279987	0.0954667	0.0364397	0.0576795	0.063582	0.101757	0.0661252	0.0420834	0.101575	0.019966	-0.00159815	0.0674183	0.0224492	0.0962126	0.0922444	0.102783	0.113542	0.0735882	0.0798271	0.121987	0.0498098	0.0860083	0.0541123	0.0858858	0.0297954	0.00541802	0.0514484	0.0669244	0.132182	0.0835852	0.0522957	0.0394834	0.0132441	0.0219255	0.0341125	0.081425	0.102305	0.0678941	0.0798692	0.0905997	0.0789726	0.00407905	0.0222633
nhr-48	0.0342571	-0.00679535	-0.0298099	0.0220808	0.021936	0.141262	0.0540828	0.00402871	-0.056322	-0.0123503	-0.0163588	-0.000781526	0.0118012	0.0202304	0.0690754	0.00818833	-0.0133709	0.0465426	0.177609	0.0134177	-0.024548	0.0358191	0.047349	0.0201443	-0.0131577	0.0628893	-0.0118557	0.000876149	0.0625637	-0.00129812	-0.00465536	0.0330412	-0.00873708	-0.00817885	0.0246369	0.269666	0.0144077	-0.0174387	-0.00465536	0.0781513	-0.0319307	-0.0113575	-0.00295593	0.135198	0.0083227	-0.0132816	0.156538	0.00733871	0.0134512
nhr-6	-0.0066388	-0.0115551	-0.00415754	0.0412952	0.00534567	0.0225459	0.0484867	-0.0154337	-0.00728413	-0.00103133	-0.00857457	-0.00562037	-0.00664664	-0.00544159	0.0205106	0.0517813	0.0136221	-0.00802769	0.0656225	-0.0105615	-0.0140844	-0.00511769	-0.00222614	-0.00700434	-0.00100357	-0.0126942	-0.0129231	-0.00965883	0.0258294	-0.00116279	-0.00267191	-0.00655091	0.000866852	-0.0107774	0.0039666	0.0446924	-0.00338781	0.0192176	-0.00267191	0.104637	-0.0138334	-0.0159411	0.0123317	0.0902781	-0.0115866	-0.00287343	0.0216994	0.0369554	-0.00334977
nhr-76	-0.00431972	0.000950564	-0.00873268	0.0128663	0.0143119	0.109915	0.0231331	-0.00865487	-0.00967576	0.00649578	0.00120978	-0.00747784	-0.00174744	-0.00206872	0.0565189	-0.00510172	0.00856971	-0.00305187	0.0478824	-0.00801395	-0.000744355	0.0105725	0.0047964	-0.00266283	-0.004165	0.00825534	-0.0086369	-0.005358	0.0105862	0.00175893	-0.00101578	0.0404128	0.00931195	-0.00735385	-0.0060267	0.038021	-0.00631724	0.00191518	-0.00101578	0.0211597	-0.00487527	-0.00606029	-0.00435768	0.0303648	-0.0100549	-0.00955613	0.0447937	0.00564791	-0.00127348
nhr-77	-0.0235246	-0.032362	-0.0620087	0.0105268	0.000252704	0.0678751	0.0853173	-0.0399961	-0.0549341	-0.0169957	-0.0214547	-0.0195293	-0.0106795	0.00390298	0.036966	0.0177199	0.0197218	-0.00293157	0.202903	-0.0158051	-0.0395082	0.0176663	0.0216819	-0.0027461	-0.00762468	0.0215823	-0.0199085	0.00686451	0.0535671	-0.0194894	0.0151094	0.0243687	-0.0196117	-0.022868	-0.0140692	0.186504	-0.0177899	-0.0208486	-0.00557149	0.139608	-0.0616037	-0.0227076	-0.0141978	0.171453	-0.0226808	-0.0308513	0.0939596	-0.00219841	0.00126473
nhr-80	-0.0110751	-0.0576914	-0.0949751	0.00288575	-0.00514729	0.0534181	0.0724676	-0.0443075	-0.115743	-0.0596006	-0.0517999	-0.0310249	-0.0485023	-0.00122208	0.0150291	0.00519184	-0.0214361	0.0237893	0.159253	-0.0240408	-0.0891237	-0.0289101	0.00809503	0.00947742	-0.0282039	0.0187613	-0.0593698	-0.0498338	0.0590083	-0.0111664	-0.0123298	0.0169309	-0.0456678	-0.0524945	-0.0189426	0.136888	-0.0350834	-0.0524455	0.0119675	0.171113	-0.111642	-0.0384997	-0.0286682	0.176777	-0.0381241	-0.054659	0.076709	0.00240796	0.00877288
nhr-90	0.267826	0.118743	0.137748	0.0462516	0.110905	0.114118	0.117336	0.15143	0.0387303	0.0308566	0.0967232	0.122884	0.118591	0.0323946	0.0772764	0.00187756	-0.00662527	0.185502	0.11809	0.159155	0.129643	0.20297	0.249187	0.121005	0.0273731	0.158886	0.113641	0.133694	0.183764	0.078418	-0.00403146	0.00136658	0.0132283	0.0870892	0.197618	0.249827	0.125317	0.0162392	0.0235016	0.124143	0.0816569	0.0600844	0.0214621	0.188874	0.133005	0.0874836	0.10273	0.0255117	-0.00505424
pha-4	0.205912	0.112351	0.123455	0.0396601	0.071877	0.0458226	0.115331	0.161471	0.0539031	0.0304279	0.124179	0.124945	0.0901893	0.037354	0.0917362	0.0411996	0.00521694	0.109443	0.0748349	0.179843	0.137596	0.154752	0.200992	0.0842039	0.0743598	0.175756	0.111281	0.113077	0.118712	0.0922078	0.0242038	0.0184774	0.0272626	0.119921	0.225446	0.144296	0.118847	0.0361998	0.0242038	0.123296	0.10729	0.0825566	0.064284	0.167321	0.135211	0.127662	0.0914862	0.041432	0.0166669
php-3	0.0399937	0.0467545	-0.00942663	0.0187408	0.0087344	0.0459302	0.0386505	0.0582345	-0.0410034	0.006021	0.0260134	0.0638652	0.0163682	0.0209216	0.0497949	-0.010943	-0.0194001	0.0415307	0.135498	0.0621519	0.0171407	0.0575143	0.0938012	0.0227421	0.0263712	0.0971831	0.00851023	0.0367905	0.0558889	0.0470608	0.00205695	0.00504318	0.00633642	0.0379616	0.0701316	0.190583	0.0154646	0.00283747	-0.00676754	0.0513449	-0.00912435	0.0405226	0.0330766	0.126775	0.0540085	0.0138167	0.170169	-0.00395873	0.0337571
pqm-1	-0.059337	-0.0624203	-0.108913	-0.00943382	-0.0191968	0.0240581	0.00693982	-0.0600639	-0.106176	-0.0408545	-0.0430213	-0.0505656	-0.0541488	-0.0163692	-0.0301171	-0.0185306	-0.0200175	-0.0163727	0.123218	-0.0483138	-0.0899945	-0.0650798	-0.035141	-0.00919709	-0.0310518	-0.018589	-0.0589677	-0.0520758	-0.00279055	-0.038184	-0.00803756	-0.000669896	-0.0450778	-0.0527241	-0.0584805	0.132166	-0.0411249	-0.0571072	-0.00803756	0.0578667	-0.0925739	-0.0466353	-0.0326596	0.0824445	-0.0511174	-0.066241	0.04579	-0.0380378	0.00231222
rcor-1	0.193536	0.129375	0.429176	0.0248214	0.051302	0.0163739	0.154678	0.148834	0.340688	0.0674743	0.277618	0.108809	0.097212	0.0389239	0.0664798	0.00719829	0.0199328	0.143425	0.012909	0.179527	0.339492	0.276347	0.234244	0.083715	0.228886	0.153962	0.271737	0.356969	0.0919573	0.131968	0.00965823	0.00127326	0.136646	0.192598	0.289699	0.0257635	0.207265	0.177938	0.00965823	0.0506605	0.328048	0.120126	0.149863	0.0780065	0.142134	0.374154	0.0476314	0.041154	0.00585901
repo-1	0.0606204	0.063549	0.0458758	0.0494401	0.105442	0.0823812	0.0377873	0.00978589	0.0347819	0.0325597	0.10614	0.0305999	0.163536	0.112793	0.0797158	0.0187238	-0.00375449	0.075852	0.108319	0.0804738	0.0864441	0.249025	0.219398	0.0898164	0.00770673	0.148876	0.129785	0.1315	0.108163	0.0178332	-0.00360316	-0.00259305	0.00409907	0.0706657	0.16429	0.11689	0.176814	0.0228734	0.0116701	0.036419	0.082274	0.0407332	-0.00829108	0.13721	0.101816	0.101886	0.0293478	0.0113327	-0.00451728
row-1	0.0114252	0.012887	-0.0155273	0.0533548	0.0218946	-0.00114655	-0.0100351	-0.0101638	-0.025382	-0.000563696	-0.00621604	0.000388814	0.0187298	0.00589299	0.0809467	0.218716	-0.0101053	3.96298e-05	-0.000750493	0.000786556	-0.00559187	-0.0111883	-0.00401235	-0.00640581	0.00625322	0.0120348	-0.00476064	0.00318278	0.0168105	0.00523841	0.0196674	0.0301497	-0.0027039	0.0103226	0.0221479	0.00797535	0.006434	0.00842495	-0.00244359	0.0265587	-0.0196368	0.00418997	-0.000108095	0.0806618	-0.00104497	0.0061334	0.0589601	0.13304	0.120419
saeg-2	0.0719742	0.11521	0.0489712	0.0102797	0.0190792	0.079606	0.0195899	0.0932694	0.0235178	0.0821597	0.0788401	0.10801	0.0730211	0.0750491	0.0969688	0.00724361	-0.00597782	0.0534981	0.0653117	0.138208	0.0868901	0.121302	0.129301	0.0477954	0.0744446	0.163769	0.0614412	0.0968155	0.0593814	0.0830923	0.0178061	-0.0064941	0.0574944	0.0931226	0.122152	0.158792	0.0368893	0.0511653	0.0178061	0.0470197	0.0428909	0.102266	0.0942129	0.0866211	0.106522	0.0671289	0.123597	0.0163631	0.0293174
sdz-12	0.0164453	0.0294903	-0.00135551	0.00577529	0.0515207	0.0194689	0.00894202	0.00606188	-0.0132054	0.0236241	0.0175966	0.0282782	0.0968885	0.0387451	0.0485721	0.0101119	-0.0100533	0.014951	0.0161592	0.0297944	0.03766	0.0600448	0.0641362	0.0445992	0.0281919	0.0641938	0.0195717	0.0367005	0.0206407	0.0334933	-0.00243102	0.00312014	0.0144422	0.0261947	0.0438318	0.0501978	0.0356063	0.006268	-0.00243102	0.00387509	0.00395221	0.0156767	0.0104247	0.0355633	0.0596696	0.00151951	0.013578	-0.00469617	-0.00304777
sdz-38	0.0317882	0.0431543	0.00844657	-0.00152006	-0.00141325	-0.00152006	0.0236246	0.0372372	-4.38002e-05	-0.00352861	-0.00311552	0.0439469	0.0104466	-0.000950435	0.0243392	-0.00234389	-0.00192992	0.0747214	-0.00674964	0.0258799	0.0397427	0.0202241	-0.00492894	0.0423644	-0.00191353	0.0300505	0.00979686	0.00650385	-0.00292978	0.0330042	-0.000466679	0.0454457	-0.00310001	0.0287214	0.0167792	-0.00379524	0.0342776	0.00808208	-0.000466679	0.0220975	0.00307938	0.0359282	-0.00200205	0.013834	0.00731434	0.00812354	0.00480388	-0.00367301	-0.000585075
sea-2	0.0449897	0.124682	0.0561492	0.0257898	-0.00483596	0.00512896	-0.00949407	0.119709	0.0275885	0.110154	0.101619	0.132225	0.0540552	0.0461941	0.0655652	0.00545107	-0.00660395	0.0175875	-0.0131054	0.0786791	0.0814988	0.0354999	0.0624556	-0.00418628	0.0757028	0.0917006	0.0390434	0.0702845	0.0170595	0.106199	-0.00159692	-0.00391528	0.0509325	0.0828346	0.0661822	-0.000318745	0.0119354	0.0803859	-0.00159692	0.00117928	0.0521927	0.132774	0.142604	0.0232037	0.085964	0.0548955	0.0446737	0.00485772	0.024747
sma-3	0.0680297	0.0980367	0.0676016	0.027312	0.0121707	0.0525946	0.0131113	0.0920213	0.0281018	0.0627025	0.0576668	0.0992096	0.0421044	0.00944558	0.0886063	-0.00437074	-0.00812334	0.0580153	0.00826776	0.0979721	0.0819725	0.0795108	0.0817119	0.0366774	0.0523356	0.0901724	0.0559463	0.0722615	0.0230213	0.0996586	0.0253879	-0.00481607	0.0329724	0.0820389	0.0834983	0.0598124	0.0279212	0.03538	-0.00196432	0.0265585	0.0515689	0.0857953	0.0621611	0.0405226	0.0893471	0.0655787	0.0606983	0.00231019	0.041181
sma-4	0.0426148	0.0673885	0.00107578	-0.00753234	0.0428145	0.11135	0.0312978	0.038071	-0.0104596	0.0340152	0.0429586	0.0507598	0.0587106	0.0580885	0.117891	0.00220432	-0.0045386	0.0185588	0.171781	0.0841876	0.0297531	0.13153	0.117277	0.029971	0.0502915	0.151822	0.049024	0.0633634	0.0773695	0.0323448	-0.00371632	-0.00304751	0.0320608	0.0420336	0.0776178	0.289381	0.022861	0.012069	0.0259638	0.0522658	0.0111033	0.0685255	0.0467261	0.144291	0.0734971	0.0334473	0.156798	-0.000325139	0.00718037
snpc-4	0.197952	0.0666091	0.24687	0.0391673	0.0626509	0.0445263	0.145576	0.0910872	0.159543	0.00891778	0.0929609	0.0564528	0.0708659	0.0244321	0.0127716	0.0107907	0.018024	0.101215	0.0330764	0.0820118	0.165882	0.143638	0.15263	0.0716886	0.0549279	0.056093	0.114603	0.146646	0.094403	0.0394298	0.0104971	0.00441468	0.0552873	0.0651525	0.16169	0.0545429	0.145702	0.0730274	0.00180061	0.077628	0.414202	0.0326779	0.0357058	0.067203	0.0782909	0.161342	0.00628032	0.011266	0.00523093
somi-1	0.00195036	0.0109088	-0.0196119	0.0128276	0.0146299	0.0965777	0.00685442	0.00306609	-0.0170693	0.00288563	0.00193796	-0.000520415	0.0194764	0.0112308	0.119777	0.0638925	3.90546e-06	0.0349945	0.0328178	0.00948329	-0.00158184	0.0226424	0.0020865	0.0184375	0.00753748	0.0140916	0.00313338	-0.00646991	0.0132505	0.00765995	-0.00177564	0.00798791	-0.00717545	-0.00860345	0.000934836	0.0426164	0.0185033	-0.0101341	-0.00177564	0.0467566	-0.00871016	0.00991566	-0.000531839	0.0615366	0.0235192	-0.000130396	0.106928	0.0527391	-0.00222612
spr-3	0.0850642	0.0531021	0.0409919	0.0960954	0.0487793	0.0665474	0.0215275	0.0530645	0.0127692	0.025084	0.0616308	0.0631584	0.1016	0.0307793	0.0584755	0.00797506	-0.00929705	0.0332636	0.0478584	0.0661825	0.0803404	0.084866	0.103878	0.058266	0.0201895	0.0788726	0.0561412	0.050677	0.086598	0.0385446	-0.00224814	0.00428497	-0.000265114	0.0478491	0.101934	0.0753227	0.0915642	0.020797	-0.00224814	0.0351467	0.0324596	0.0232193	0.0184794	0.0569135	0.0580487	0.0314786	0.0190253	0.029035	0.016309
sptf-2	0.0681765	0.0284444	0.0640216	0.0128663	0.0143119	0.0290411	0.035834	0.0862259	0.0500422	-0.000592307	0.057147	0.0579718	0.0376683	0.049545	0.00456896	-0.00510172	-0.00420068	0.084573	0.0165956	0.0872649	0.0542183	0.0678045	0.0617205	0.0575453	0.0473485	0.023589	0.0610795	0.0679397	0.0275494	0.0100477	-0.00101578	-0.00249045	0.00128223	0.0665461	0.0744948	0.038021	0.0707182	0.0134111	-0.00101578	0.0272069	0.0757838	0.0563259	0.00795853	0.0387341	0.0503876	0.0826336	0.025908	0.00564791	-0.00127348
tag-97	-0.00809562	0.0918402	0.0287479	-0.00418346	-0.0038895	0.00862984	-0.00586739	0.0541971	0.0261893	0.0801289	0.0294074	0.0827184	0.0103002	0.0178278	0.0665182	0.00190393	-0.00531148	-0.0038589	1.23515e-05	0.0437795	0.0399582	0.0341688	0.035628	-0.00336697	0.106955	0.0760787	0.0292448	0.0405223	0.00537456	0.0968025	-0.00128438	-0.00314901	0.0741606	0.0492433	0.0378434	0.0105053	0.0055735	0.0470801	-0.00128438	-0.0114769	0.0301814	0.112359	0.0822994	0.0155719	0.0482259	0.0107389	0.0411025	0.000698581	0.0315679
tbx-9	0.0494726	0.0591792	0.0684328	0.106698	0.149012	0.0123258	0.0528881	0.0403059	0.061389	0.0334562	0.140668	0.048882	0.138373	0.0480626	0.00397067	-0.00524724	-0.0043205	0.133195	0.00390469	0.0777908	0.0889715	0.11683	0.119803	0.19242	0.0332859	0.0598184	0.126704	0.121475	0.051175	0.00940431	-0.00104475	0.0182986	0.0242932	0.0930431	0.130546	0.107232	0.201589	0.0180933	-0.00104475	0.0259474	0.0935848	0.0717656	0.00749458	0.0716626	0.0804934	0.0966275	-0.00761044	0.0315764	-0.0013098
tra-1	0.110714	0.105425	0.0469686	0.00584913	0.00238898	0.0830161	0.0454354	0.108834	-0.0140111	0.0292978	0.0528735	0.0920226	0.0416391	0.0276157	0.135455	0.0252833	-0.0141774	0.0695704	0.140966	0.1141	0.084883	0.106964	0.133441	0.0269623	0.0598365	0.141106	0.0378893	0.0825362	0.0964013	0.108331	0.00423259	0.0226583	0.0397177	0.0610635	0.122364	0.228005	0.0277231	0.0222146	0.00423259	0.053318	0.0235194	0.0607253	0.0691935	0.151077	0.0842897	0.059925	0.253187	0.0377757	0.00873174
unc-130	0.0775701	0.0302301	0.372552	0.020055	0.0892608	0.00467237	0.199583	0.0341442	0.339034	0.0133362	0.142708	0.0311214	0.102194	0.0178462	0.001568	-0.00648497	0.0187884	0.117899	0.0119514	0.0754575	0.246032	0.22049	0.112915	0.0931746	0.178397	0.0402782	0.241268	0.29765	0.0734626	0.0550629	0.0133537	-0.0012616	0.118159	0.0699021	0.152454	0.0298497	0.26446	0.171245	-0.00328821	0.051133	0.219158	0.0368875	0.0795978	0.0726311	0.0632549	0.33255	-0.00996527	0.0389923	-0.00412243
unc-39	-0.00137052	-0.00139138	-0.00221691	-0.000458193	-0.000425997	-0.000458193	-0.0011936	-0.00119859	-0.00231293	-0.00106363	-0.000939115	-0.00103558	-0.00115176	-0.000286491	-0.00116586	-0.000706521	-0.000581739	-0.000422645	-0.00203455	-0.00110983	-0.00185961	-0.00193266	-0.00148574	-0.000368767	-0.000576799	-0.000980257	-0.0011961	-0.00146707	-0.000883128	-0.000904303	-0.000140672	-0.000344895	-0.000934439	-0.00101841	0.0347098	-0.001144	-0.000874855	-0.00132681	-0.000140672	-0.001257	-0.00185098	-0.000839271	-0.000603482	-0.00313546	-0.00139247	-0.0013234	-0.00164291	-0.00110716	-0.00017636
unc-62	-0.0154652	-0.00625847	-0.0273148	-0.000524702	-0.00709007	0.0846899	0.0135905	-0.0116176	-0.0292417	-0.00836694	-0.00510524	-0.0108503	-0.00186459	-0.0047682	0.00910554	-0.00712873	-0.00407558	0.00835369	0.127534	-0.00651989	-0.0142448	0.0127027	0.0116232	-0.00613756	0.00170804	0.0341746	-0.0171247	0.0146584	0.0188147	-0.00777269	-0.00234126	-0.00574025	-0.00850176	-0.0104611	-0.0166528	0.172539	-0.0070449	-0.0170357	0.0207063	0.0454524	-0.019624	-0.0022301	-0.00463686	0.110712	0.00336054	-0.0169667	0.128119	-0.00944272	-0.00293524
vab-7	0.363828	0.229982	0.262674	0.0169398	0.030123	0.012183	0.0949072	0.306355	0.0994998	0.0689579	0.131328	0.221867	0.0616403	0.0458731	0.107983	0.0317373	-0.00721824	0.154225	-0.00665878	0.252106	0.260032	0.116975	0.202841	0.0555873	0.144467	0.196145	0.111372	0.130684	0.0824025	0.194055	-0.00356179	0.0101935	0.13692	0.16764	0.29719	0.015756	0.073505	0.115163	-0.00356179	0.0393108	0.150394	0.141254	0.14047	0.0707522	0.157043	0.203723	0.126413	0.048198	-0.00446541
zag-1	-0.00137052	-0.00139138	-0.00221691	-0.000458193	-0.000425997	-0.000458193	-0.0011936	-0.00119859	-0.00231293	-0.00106363	-0.000939115	-0.00103558	-0.00115176	-0.000286491	-0.00116586	-0.000706521	-0.000581739	-0.000422645	-0.00203455	-0.00110983	-0.00185961	-0.00193266	-0.00148574	-0.000368767	-0.000576799	-0.000980257	-0.0011961	-0.00146707	-0.000883128	-0.000904303	-0.000140672	-0.000344895	-0.000934439	-0.00101841	-0.00153157	-0.001144	-0.000874855	-0.00132681	-0.000140672	-0.001257	-0.00185098	-0.000839271	-0.000603482	-0.00313546	-0.00139247	-0.0013234	-0.00164291	-0.00110716	-0.00017636
zfh-2	-0.0272087	0.0777007	-0.0556034	0.0114236	-0.00610146	-0.00776167	-0.0377835	0.0225605	-0.0719002	0.0760785	0.00659196	0.0415938	0.0678624	0.000892041	0.0301309	0.0658494	-0.0295276	0.00123634	-0.108692	-0.000255745	-0.00464283	-0.0109626	-0.0145877	0.00662055	0.00144481	-0.020292	-0.00379318	-0.00471129	-0.0210323	0.0105001	-0.00266342	0.0047784	0.000902533	0.0260752	-0.00483687	-0.0143158	0.00132367	-0.0297748	0.0111737	-0.00592461	-0.0421591	0.0297496	0.0286892	-0.0268009	0.0543277	-0.0225617	-0.0154613	0.0621293	0.0155855
zfp-2	0.0387897	0.0557871	0.0369658	0.0240088	0.0261073	-0.00205014	0.0253523	0.0353998	0.0179482	0.0180798	0.00867221	0.0422306	0.0371812	-0.00128187	0.0261693	0.01383	0.0179712	0.111045	0.0097987	0.016963	0.0121138	0.024283	0.0433754	0.0306833	0.0181672	0.0326696	0.0457021	0.0609148	0.0370421	0.0226616	-0.00062942	0.033017	0.021692	0.0192549	0.0417946	0.037489	0.0236656	0.0218446	-0.00062942	0.0236036	-0.00144262	0.0106032	0.0171422	0.0399051	0.0291796	0.0590582	0.0230752	0.028015	-0.000789104
zim-3	0.0828837	0.0945361	0.0435877	0.0193617	0.0980118	0.0317107	0.0228325	0.0562606	0.00659834	0.0280283	0.0657365	0.0415094	0.186573	0.076895	0.0761981	0.0193368	-0.017228	0.0722229	0.0313135	0.0883713	0.0783482	0.148757	0.158814	0.0759064	0.0189702	0.113404	0.0726446	0.0951234	0.0839298	0.0428307	0.00919402	-0.00475465	0.0213709	0.0676361	0.104491	0.0805387	0.109147	0.0119055	0.00919402	0.0335675	0.0478195	0.0386524	0.00406875	0.083218	0.0930066	0.0693176	0.0318506	0.0383864	0.00543586
zip-11	0.117594	0.115626	0.0820927	-0.00372882	0.0428525	-0.00372882	0.0184808	0.141896	0.0248464	0.0542832	0.0775057	0.133635	0.0489594	0.0205839	0.0654723	0.00361512	-0.00473425	0.10549	-0.00266671	0.136003	0.097492	0.0459813	0.116572	0.0682818	0.0753541	0.148602	0.0634267	0.0438481	0.0304695	0.103042	-0.0011448	-0.00280679	0.0636959	0.0967039	0.139473	0.00243174	0.0384831	0.0453458	-0.0011448	0.0166189	0.0716366	0.0802211	0.104451	0.0265043	0.071613	0.0762068	0.0369388	0.00916086	-0.00143524
zip-2	0.017395	0.0167783	0.0158694	0.00823308	-0.00398255	0.0207497	0.00358374	0.00837387	-0.00531299	-0.00445868	-0.00877957	-0.00405397	0.0146502	-0.00267834	0.0142261	-0.00660511	-0.00543854	0.00961021	0.062691	0.00542376	0.00551676	0.00407604	0.0181464	-0.00344752	-0.00539236	0.00270151	-0.00137315	0.0146448	0.0311239	0.0172025	-0.00131511	-0.00322434	-0.00873586	-0.00952091	0.0246256	0.020003	0.00506841	0.0187318	-0.00131511	0.0631219	-0.0140193	-0.00784616	-0.00564181	0.121804	-0.00451378	0.00100399	0.0138695	-0.00507203	-0.00164875
znf-207	0.0794019	0.0539532	0.0438772	0.0541156	0.172397	0.101065	0.0295664	0.0293533	0.020261	0.00996325	0.0602161	0.0741024	0.141055	0.0907761	0.092038	0.0159112	-0.00580336	0.072086	0.0534896	0.0778219	0.0550804	0.129043	0.142897	0.0691381	0.0503173	0.073673	0.0754504	0.0879428	0.101974	0.00902315	-0.00140332	-0.00344063	0.0198121	0.0649164	0.130798	0.0941387	0.127919	0.003448	-0.00140332	0.0269542	0.0400654	0.030431	0.00291702	0.0901852	0.0698421	0.0746011	0.0178716	0.0186544	-0.00175935
ztf-18	0.248476	0.092692	0.250814	0.0353328	0.0560481	0.0250964	0.187058	0.152068	0.163697	0.0154613	0.0715641	0.0908033	0.052017	0.00962245	0.0220109	0.00681375	-0.00554265	0.189737	0.0303135	0.103218	0.182542	0.113845	0.137141	0.0802711	0.0639183	0.0668048	0.120393	0.14622	0.110825	0.0863569	0.0133169	-0.00128961	0.0568814	0.0696852	0.171151	0.0359711	0.152853	0.11807	-0.00329458	0.146606	0.144714	0.0395666	0.0677079	0.0819336	0.0769269	0.193262	0.0362225	0.0452993	-0.00413041
ztf-22	-0.00093835	0.00815594	-0.00869877	0.00366649	-0.00532546	0.0882164	0.0219621	-0.0113099	-0.0207532	-0.000946261	0.00218369	-0.000274816	0.000863616	0.0263961	0.0193699	-0.00270685	-0.00727242	0.0150737	0.113124	-0.00201588	-0.00360259	0.0233262	0.0295165	0.00704639	-0.00721066	0.0589928	-0.00759049	0.0242317	0.0185168	-0.0113049	-0.00175856	-0.00431159	-0.0116816	-0.0127314	0.00716027	0.292907	-0.000993911	-0.00657133	-0.00175856	0.0334581	-0.00587984	-0.000139231	-0.000390901	0.0855673	0.0176979	0.000188567	0.119315	0.00200662	-0.00220471
[truncated: 6 more rows]
[truncated: 133 more columns]

## Sheet: s6.Worm_larvae
TF	C04F5.9	C16A3.4	C34B4.2	R02D3.7	Y55F3AM.14	ZK546.5	aha-1	alr-1	bcl-11	blmp-1	ceh-16	ceh-37	ceh-38	ceh-63	ceh-8	ceh-82	ceh-88	ceh-90	ces-1	crh-2	daf-12	dmd-4	dpl-1	dsc-1	efl-1	efl-3	egl-13	egl-27	egl-5	elt-1	elt-2	elt-3	eor-1	ets-5	fkh-10	fkh-2	fkh-4	fkh-7	fkh-8	fos-1	gmeb-1	grh-1	hlh-17	hlh-4	hmg-11	irx-1	2024-06-01	lin-11	lin-13
[truncated: 115 more rows]
[truncated: 66 more columns]

## Sheet: s7.Worm_embryo
TF	B0310.2	C38D4.7	K09A11.1	M03D4.4	T22C8.4	T23F11.4	Y22D7AL.16	ahr-1	bcl-11	bed-3	blmp-1	ceh-13	ceh-14	ceh-18	ceh-19	ceh-2	ceh-22	ceh-24	ceh-30	ceh-31	ceh-34	ceh-36	ceh-39	ceh-43	ceh-45	ceh-48	ceh-5	ceh-51	ceh-6	ceh-83	ceh-9	ces-1	che-1	cnd-1	cog-1	dmd-4	drap-1	dve-1	elt-1	elt-2	elt-3	elt-4	ets-4	ets-7	eyg-1	fax-1	fkh-10	fkh-6	flh-1
[truncated: 123 more rows]
[truncated: 74 more columns]
