# Supplementary material for: Binding profiles for 961DrosophilaandC. eleganstranscription factors reveal tissue-specific regulatory relationships
Source: HighWire-hosted journal article supplement (doi:10.1101/gr.279037.124), 2024-10-22
Supplement: Supplemental_File_S3.xlsx [file Supplemental_File_S3.xlsx]

## Sheet: Supplemental_File_S3_legend
Each spreadsheet shows the number of peaks (all peaks) or the fraction of peaks (fraction) for each TF in the 3 prime end, 5 prime less than or equal 500 base pairs from the transcription start site (TSS), 5 prime greater than 500 base pairs from the TSS, in an exon, or an intron.
s1.Fly_all peaks
s2.Fly_all peaks by fraction
s3. Fly_non-HOT peaks
s4. Fly_non-HOT peaks by fraction
s5.Worm_all peaks
s6.Worm_all peaks by fraction
s7. Worm_non-HOT peaks
s8. Worm_non-HOT peaks by fraction

## Sheet: s1.Fly_peaks_all peaks
TF	3P	5P<=500	5P>500	Exon	Intron	Total
ATbp	440	1071	1184	233	1364	4292
Abd-B	495	2079	1252	370	1232	5428
Adf1	317	2220	986	996	1088	5607
Aef1	367	1881	1049	486	1165	4948
Antp	343	1660	801	425	839	4068
Asciz	435	1021	1077	267	1319	4119
Atf-2	239	1197	648	231	665	2980
Atf3	194	1052	544	198	531	2519
Atf6	441	1886	1200	778	1541	5846
Awh	716	1317	1594	531	1653	5811
B-H1	300	1239	810	216	899	3464
B-H2	196	1873	555	524	714	3862
Bdp1	279	1315	699	359	687	3339
Blimp-1	2276	3886	5564	1675	5928	19329
BtbVII	246	1090	638	331	826	3131
BuGZ	80	652	199	199	260	1390
C15	186	840	472	199	514	2211
CG10147	308	1709	827	498	919	4261
CG10209	457	1653	1218	266	1260	4854
CG1024	379	1437	934	376	854	3980
CG10274	137	813	522	162	580	2214
CG10321	308	1080	800	404	865	3457
CG10348	195	591	496	116	518	1916
CG10366	481	1803	1262	335	1259	5140
CG10431	292	1363	771	506	935	3867
CG10462	198	1212	535	209	570	2724
CG10543	381	1954	1022	896	1419	5672
CG10631	1848	2267	3988	468	3476	12047
CG10654	284	1665	760	223	834	3766
CG10669	1044	1543	2322	414	2209	7532
CG10949	132	2689	337	1043	389	4590
CG10959	418	987	973	267	773	3418
CG10979	1292	3195	2999	1422	2965	11873
CG11085	275	1311	648	298	592	3124
CG11093	381	1050	896	313	889	3529
CG11247	398	1614	981	501	984	4478
CG11294	434	1198	1171	250	1275	4328
CG11398	206	986	523	371	666	2752
CG11456	754	1888	1686	1054	1255	6637
CG11504	1945	2850	4383	874	3637	13689
CG11560	343	1293	717	359	582	3294
CG11617	453	3696	1340	2024	2244	9757
CG11695	535	1760	1422	572	1687	5976
CG11696	368	1051	910	316	1082	3727
CG11723	218	1390	644	339	740	3331
CG11902	500	1390	1257	199	1206	4552
CG11906	437	3824	961	2572	1155	8949
CG11966	75	1896	153	898	261	3283
CG12071	619	1460	1576	694	1749	6098
CG12104	160	1151	465	139	579	2494
CG12155	332	2408	914	515	1080	5249
CG12219	354	1197	958	313	1082	3904
CG12236	198	892	550	219	612	2471
CG12299	156	1063	439	355	549	2562
CG1233	406	1561	1120	373	1278	4738
CG12391	1157	3956	2670	915	2602	11300
CG12605	666	1857	1659	909	1919	7010
CG12744	225	1374	577	345	621	3142
CG12768	148	1262	468	460	731	3069
CG12769	1578	2768	4090	1671	4585	14692
CG12942	259	1665	717	237	814	3692
CG13123	331	1766	831	378	946	4252
CG13204	1650	1584	3485	1168	3276	11163
CG13287	251	3870	592	1712	606	7031
CG13296	671	2569	1847	1052	2172	8311
CG13775	397	2138	1038	522	1077	5172
CG13894	1309	2259	2692	991	2659	9910
CG13897	292	1036	786	310	781	3205
CG14014	458	1936	1242	598	1441	5675
CG14050	304	1282	803	248	891	3528
CG14441	509	1867	1393	530	1516	5815
CG14655	1531	1477	3346	367	2996	9717
CG14667	359	1217	867	202	815	3460
CG14710	1268	5046	2757	1730	2598	13399
CG14711	147	1959	506	524	761	3897
CG14860	280	1847	482	779	370	3758
CG14965	116	393	300	116	284	1209
CG15011	538	1281	1387	299	1521	5026
CG15073	76	447	227	88	227	1065
CG15269	1014	2319	2590	731	2750	9404
CG1529	377	1109	930	239	1031	3686
CG15336	1235	2298	2977	1058	3219	10787
CG15436	80	2208	201	678	200	3367
CG15514	368	3410	910	980	1090	6758
CG15601	662	2505	1556	707	1541	6971
CG15696	527	1710	1175	268	1077	4757
CG15710	1389	2823	3201	958	3086	11457
CG15812	166	1079	438	434	514	2631
CG1602	340	1640	899	203	912	3994
CG1603	1012	3408	2464	986	2216	10086
CG1620	97	1842	264	401	396	3000
CG1647	212	1260	523	265	604	2864
CG1663	1869	2459	4019	770	3463	12580
CG16779	1313	2845	3216	1705	3322	12401
CG16813	417	2624	714	1101	460	5316
CG16815	327	1284	804	151	751	3317
CG16863	297	1381	767	316	831	3592
CG17186	94	1816	254	469	282	2915
CG17328	646	1817	1611	626	1447	6147
CG17359	984	2604	2468	893	2575	9524
CG17361	905	2966	2234	699	2074	8878
CG17385	439	1939	1248	925	1533	6084
CG17568	530	1327	1469	664	1660	5650
CG17612	212	804	474	204	513	2207
CG17801	279	2115	724	1048	1203	5369
CG17802	210	1239	588	249	509	2795
CG17806	1399	2376	3064	730	2999	10568
CG17829	976	4023	2183	1252	2117	10551
CG1792	189	1194	573	341	661	2958
CG18011	188	1213	435	344	440	2620
CG18262	1495	3497	3458	1122	3223	12795
CG18476	234	1263	602	186	647	2932
CG18599	1532	2244	3262	779	3149	10966
CG18764	278	1600	745	267	795	3685
CG2116	201	3622	553	890	601	5867
CG2120	799	3497	1939	850	2189	9274
CG2129	44	1386	67	500	69	2066
CG2199	921	1597	2230	1190	2189	8127
CG2202	460	1565	1145	558	1187	4915
CG2678	1310	2695	3121	921	3234	11281
CG2712	1199	3701	2681	835	2432	10848
CG2889	292	1023	743	333	690	3081
CG30020	626	3832	1357	1641	1470	8926
CG3032	1067	2767	2510	728	2378	9450
CG30403	723	3034	1808	532	1852	7949
CG30431	366	1169	929	176	838	3478
CG3065	189	1036	532	216	480	2453
CG31224	339	1384	856	312	919	3810
CG31365	220	919	582	337	606	2664
CG31388	103	769	313	101	329	1615
CG31441	868	2245	2009	434	1852	7408
CG31627	813	2348	1865	387	1828	7241
CG3163	294	1943	897	783	909	4826
CG32006	1716	1902	3829	453	3563	11463
CG32121	799	2158	2070	953	2472	8452
CG32532	666	2824	1575	914	1738	7717
CG32767	365	1499	1008	560	1189	4621
CG32772	530	1532	1265	423	1282	5032
CG3281	437	2111	1267	728	1638	6181
CG33017	146	1524	517	404	812	3403
CG33213	364	2350	795	595	779	4883
CG33557	420	1715	1088	569	1100	4892
CG3407	356	1049	876	189	953	3423
CG34224	161	2665	396	1255	481	4958
CG34367	755	1432	1628	390	1679	5884
CG34376	512	2883	1313	1637	2007	8352
CG3726	374	856	820	403	711	3164
CG3838	113	763	301	170	335	1682
CG3847	436	2818	1100	693	1101	6148
CG3919	1211	2016	2536	724	2359	8846
CG3995	125	2181	334	684	428	3752
CG42726	247	1646	501	1309	319	4022
CG42741	335	4350	808	2610	1088	9191
CG4282	115	958	332	364	385	2154
CG4318	1148	1308	2677	209	2434	7776
CG4328	197	1156	487	277	587	2704
CG43347	366	2069	968	277	1086	4766
CG4360	571	1206	1484	1340	1592	6193
CG43689	171	718	481	169	523	2062
CG44002	928	1916	2132	435	2082	7493
CG4404	441	1210	1043	311	830	3835
CG4424	480	1979	1189	325	1196	5169
CG4496	1470	2860	3424	1631	3344	12729
CG4617	73	1867	188	1949	459	4536
CG4707	297	987	922	332	975	3513
CG4730	344	1201	902	222	882	3551
CG4820	343	1524	904	222	909	3902
CG4854	235	1557	660	508	836	3796
CG4936	285	3803	681	2182	803	7754
CG5180	511	1442	1343	673	1340	5309
CG5245	311	1367	797	242	806	3523
CG5953	293	994	774	449	794	3304
CG6163	1516	2579	3467	1382	3497	12441
CG6254	287	843	685	208	691	2714
CG6272	324	1525	685	382	652	3568
CG6276	978	1408	2405	563	2682	8036
CG6654	195	769	506	131	529	2130
CG6683	218	1492	655	523	837	3725
CG6689	701	1934	1709	435	1655	6434
CG6765	121	820	351	226	486	2004
CG6791	491	2561	927	1415	678	6072
CG6808	967	1642	2223	689	2270	7791
CG6813	429	935	1064	198	1185	3811
CG7101	313	2874	887	812	1313	6199
CG7271	145	694	320	191	290	1640
CG7357	428	1516	1091	374	1043	4452
CG7368	641	1446	1545	379	1601	5612
CG7372	515	1519	1219	315	1213	4781
CG7691	78	2022	175	701	223	3199
CG7745	344	746	755	423	781	3049
CG7786	242	1616	717	341	804	3720
CG7963	202	1728	362	742	278	3312
CG7987	488	2179	1254	1232	1574	6727
CG8089	252	1168	663	342	739	3164
CG8119	1351	2115	3083	883	3171	10603
CG8159	1877	2508	4010	761	3496	12652
CG8281	453	1078	1114	266	1189	4100
CG8301	1395	1960	3284	704	3342	10685
CG8319	481	1230	1096	261	1135	4203
CG8388	669	1853	1618	385	1571	6096
CG8478	455	2643	1140	1495	1033	6766
CG8765	279	1069	675	270	532	2825
CG8924	1233	3644	2970	1800	3177	12824
CG8944	245	1360	652	286	695	3238
CG9215	347	1611	884	350	856	4048
CG9609	259	1513	681	320	704	3477
CG9727	706	2296	1716	580	1781	7079
CG9876	156	1065	402	233	416	2272
CG9932	574	2982	1467	801	1470	7294
CG9948	1353	1975	2936	429	2668	9361
CHES-1-like	153	1694	496	633	607	3583
CTCF	1689	4444	3063	1956	1675	12827
CTPsyn	877	2692	2100	1749	2405	9823
Camta	250	1322	652	281	740	3245
Cf2	93	1476	254	1054	376	3253
CkIIα-i1	76	358	193	75	221	923
Clamp	799	733	1859	2046	1160	6597
Clk	55	794	206	144	287	1486
CoRest	824	3425	2088	585	1926	8848
Coop	913	1922	2079	1284	2002	8200
CrebA	588	1720	1481	726	1787	6302
CrebB	180	1102	529	380	636	2827
Crg-1	97	1107	235	326	382	2147
D	595	1328	1423	445	1305	5096
D1	752	1179	1794	506	1547	5778
D19A	1402	2519	3273	915	3206	11315
D19B	274	1139	745	200	807	3165
Dbx	477	2432	1112	1138	1227	6386
Deaf1	1459	4227	3590	2519	3395	15190
Dfd	501	542	857	549	503	2952
Dif	164	1005	502	464	512	2647
Dip2	116	356	233	64	141	910
Dlip3	180	1589	528	258	640	3195
Dll	437	3373	896	1986	908	7600
Doc2	108	428	264	94	250	1144
Doc3	107	1977	271	881	271	3507
Dp	558	6266	1211	2653	1332	12020
Dref	325	3327	668	849	354	5523
Drgx	905	1987	2268	803	2480	8443
E(bx)	759	6217	1723	2396	1402	12497
E(spl)m3-HLH	417	1810	1054	237	1082	4600
E(spl)m5-HLH	179	576	446	225	411	1837
E(spl)m7-HLH	221	844	567	206	615	2453
E(spl)m8-HLH	998	2182	2154	638	2029	8001
E(spl)mbeta-HLH	2040	6270	4983	2885	5417	21595
E(spl)mdelta-HLH	235	790	591	625	551	2792
E(spl)mgamma-HLH	339	1743	917	227	942	4168
E(var)3-9	194	1294	553	162	617	2820
E2f1	467	1769	1194	465	1268	5163
E2f2	538	4332	1282	1261	1339	8752
ERR	238	1565	652	702	867	4024
EcR	2266	3113	5307	2988	6507	20181
Eip74EF	626	2002	1729	917	2140	7414
Eip75B	1125	2191	2535	733	2687	9271
Eip78C	1134	1914	2529	502	2426	8505
Eip93F	178	672	437	180	480	1947
Ets21C	508	1449	1191	217	1170	4535
Ets65A	195	1455	543	281	555	3029
Ets96B	1345	2312	3021	707	2761	10146
Ets97D	244	3152	551	725	535	5207
Ets98B	853	2391	2104	1019	2421	8788
Fer1	612	2913	1591	1490	2026	8632
Fer2	192	1371	523	223	600	2909
Fer3	453	1944	1229	431	1390	5447
FoxK	57	1698	201	852	293	3101
FoxL1	312	732	800	330	914	3088
FoxP	784	1710	1875	770	2095	7234
GATAd	72	455	172	104	213	1016
GATAe	210	1071	574	317	860	3032
Gsc	192	458	416	83	321	1470
Gug	1045	3277	2571	709	2636	10238
H15	489	1366	1117	380	1023	4375
H2.0	437	1631	1089	330	1078	4565
HGTX	282	2743	669	1951	861	6506
HHEX	354	1360	934	322	1097	4067
HLH3B	574	1781	1484	482	1491	5812
HLH4C	331	2420	622	1247	524	5144
HLH54F	225	1903	657	330	742	3857
Hand	193	992	578	325	678	2766
Hey	476	842	999	323	943	3583
HmgD	149	1425	425	583	406	2988
HmgZ	386	3280	1012	1112	1233	7023
Hmx	105	822	343	153	406	1829
Hnf4	614	2256	1414	814	1664	6762
Hr3	376	2083	1023	274	1071	4827
Hr38	43	242	112	57	154	608
Hr39	1158	2059	2523	641	2203	8584
Hr4	1127	1831	2560	338	2547	8403
Hr51	1571	3930	3605	1001	3471	13578
Hr78	1231	2338	2992	1175	3654	11390
Hr83	204	1412	507	588	666	3377
Hr96	191	1456	575	435	673	3330
Hsf	439	2237	1108	390	1144	5318
Jra	246	1505	629	535	843	3758
Kah	246	1270	682	607	929	3734
Klf15	300	2021	813	540	976	4650
Kr	195	235	460	92	378	1360
Kr-h1	366	3640	912	2266	1172	8356
Lim3	123	516	370	89	347	1445
M1BP	103	2916	252	1322	357	4950
MBD-R2	286	2908	763	2603	983	7543
MESR4	320	2750	776	5678	1695	11219
MTF-1	207	803	537	296	631	2474
Mabi	1002	1926	2254	1694	2514	9390
Mad	212	1589	568	361	639	3369
Max	229	1967	611	614	758	4179
Med	489	2375	1259	711	1260	6094
Mef2	690	3676	1569	2596	2039	10570
Meics	612	2132	1606	529	1745	6624
Mes2	151	1159	485	595	474	2864
Met	1272	2084	2809	530	2663	9358
Mnt	182	2514	505	1664	1070	5935
Mondo	55	477	145	97	194	968
Mrtf	454	1232	1042	353	916	3997
Myb	291	3122	650	804	634	5501
Myc	453	3074	1056	1353	934	6870
NC2alpha	151	813	405	225	421	2015
NC2beta	314	1936	867	757	935	4809
NFAT	338	2034	881	765	881	4899
NK7.1	136	828	375	168	442	1949
Neu2	113	492	243	204	235	1287
Nf-YA	286	1088	809	358	813	3354
Nf-YB	1105	2749	2717	1024	2239	9834
NfI	445	2208	1254	506	1323	5736
Oaz	236	1013	663	208	652	2772
OdsH	1769	3861	4028	975	4034	14667
Oli	926	1931	2267	333	2095	7552
Opbp	333	2619	703	1512	494	5661
Optix	381	1059	888	348	834	3510
PHDP	918	2904	2297	966	2554	9639
Pdp1	1510	5030	3744	2254	4750	17288
Plzf	899	1978	1998	440	1973	7288
Poxn	95	663	274	114	303	1449
Ptx1	818	2268	1986	410	1933	7415
REPTOR	339	2340	894	867	1093	5533
REPTOR-BP	294	1571	823	249	929	3866
Rel	1264	4092	2953	2508	3867	14684
Rfx	755	3342	1934	1120	2096	9247
RunxB	109	2012	273	781	322	3497
Rx	338	1159	852	265	809	3423
SREBP	959	2762	2149	618	2011	8499
Scr	242	3169	490	1361	479	5741
Sidpn	383	3847	1028	1535	1199	7992
Six4	303	1473	837	227	834	3674
Smox	1604	2323	3397	602	2918	10844
Snoo	818	2394	1958	896	2053	8119
Sox100B	694	1872	1767	454	1960	6747
Sox102F	2705	4084	6079	1236	5861	19965
Sox14	920	2604	2074	982	2314	8894
Sox15	453	1382	1104	199	1102	4240
SoxN	228	2163	615	956	640	4602
Sp1	1168	3143	2719	1628	2792	11450
Spps	317	1135	743	259	759	3213
Sry-beta	197	1502	561	482	506	3248
Sry-delta	461	4623	1130	1918	1286	9418
Stat92E	468	2070	1094	1371	1177	6180
Su(H)	2443	3883	5584	7568	5750	25228
TFAM	115	515	355	96	377	1458
TfAP-2	110	2709	251	1214	327	4611
Trl	2181	7410	5930	4378	6454	26353
Usf	170	1059	483	146	462	2320
Vsx1	522	1388	1307	537	1648	5402
Vsx2	245	615	589	267	424	2140
Xbp1	530	2471	1341	418	1321	6081
Xrp1	1049	2412	2336	616	2320	8733
ZIPIC	66	984	165	199	196	1610
Zif	942	4776	2138	1432	1962	11250
ab	132	794	359	156	431	1872
abd-A	2605	1486	4947	809	4153	14000
ac	380	903	860	388	844	3375
achi	1201	2165	2611	550	2466	8993
acj6	1100	1992	2500	328	2294	8214
al	275	1662	746	269	870	3822
amos	335	3102	636	1346	406	5825
aop	145	620	393	189	345	1692
ap	321	1077	855	186	850	3289
apt	143	2246	337	960	361	4047
ara	650	1413	1453	626	1329	5471
ase	404	1379	1041	364	983	4171
ato	143	1765	294	902	243	3347
az2	456	1846	1166	247	1163	4878
bab1	515	3599	1190	2356	1813	9473
bab2	312	1457	777	261	867	3674
bap	130	2680	290	1409	381	4890
bbx	254	2741	613	1638	552	5798
bcd	388	1887	1046	291	1116	4728
bigmax	110	738	233	471	477	2029
bin	111	1720	275	981	330	3417
bowl	171	772	449	293	513	2198
br	890	2990	2207	1263	2476	9826
brk	711	1982	1591	601	1800	6685
bs	104	1765	309	679	345	3202
bsh	1868	4091	4435	1535	4621	16550
btn	154	653	398	153	427	1785
cad	325	357	753	236	566	2237
cas	146	1056	364	250	416	2232
cato	176	1113	481	155	541	2466
caup	434	1829	1080	555	1322	5220
cbt	424	1331	1159	506	1282	4702
cg	1867	2548	4534	2715	5320	16984
chinmo	1159	3470	3040	2445	3734	13848
chn	286	1608	791	374	786	3845
ci	1043	2737	2554	1781	2543	10658
cic	632	3167	1661	2219	2897	10576
cnc	607	2404	1546	1338	2244	8139
crc	124	814	384	147	463	1932
croc	377	1239	970	196	862	3644
crol	1269	1437	3149	1012	3195	10062
crp	202	4036	579	1685	932	7434
cwo	873	2375	2296	1004	2857	9405
cyc	799	2218	1785	408	1719	6929
da	121	736	319	190	351	1717
dac	355	1040	986	227	1030	3638
dan	195	393	346	105	262	1301
danr	224	994	685	172	703	2778
dati	167	653	437	152	483	1892
dimm	199	636	479	111	472	1897
disco-r	122	765	332	170	395	1784
dl	176	1132	626	439	647	3020
dmrt11E	1029	2578	2259	538	1999	8403
dmrt93B	476	1305	1137	194	1048	4160
dmrt99B	1596	2022	3611	563	3268	11060
dpn	867	4516	2170	901	2336	10790
drm	149	2932	376	1931	548	5936
dsf	319	1657	764	465	890	4095
dsx	1899	2713	4038	1364	3859	13873
dve	377	2899	937	1529	1269	7011
dysf	855	2261	2130	671	2026	7943
eg	1294	2595	3246	1208	3380	11723
emc	93	845	286	144	330	1698
ems	228	1531	685	382	738	3564
en	219	959	628	292	692	2790
erm	102	2163	186	806	226	3483
esg	440	1482	1122	197	1156	4397
eve	1223	1085	2922	680	3102	9012
ewg	467	2236	1158	579	1165	5605
exex	1140	2942	2818	1409	3849	12158
ey	674	2016	1546	457	1626	6319
eyg	153	951	422	258	534	2318
fd102C	203	519	481	142	353	1698
fd19B	115	2371	286	1278	384	4434
fd3F	267	1601	816	250	984	3918
fd59A	621	1078	1376	197	1340	4612
fd96Ca	936	1855	2287	945	2347	8370
fd96Cb	607	1594	1497	196	1447	5341
fkh	838	2593	2254	1676	3192	10553
foxo	1143	2938	2538	757	2562	9938
fru	1097	2539	2442	1095	2485	9658
ftz-f1	439	2582	1291	1856	1843	8011
gce	360	1091	901	474	929	3755
gcm	953	2180	2185	976	2307	8601
gcm2	209	1284	585	406	739	3223
gem	2242	2907	5013	621	4349	15132
gfzf	292	4733	622	2017	712	8376
gl	727	1577	1650	904	2038	6896
grau	1279	3591	3140	1074	3197	12281
grh	322	541	909	467	955	3194
grn	904	1693	1933	912	2282	7724
gsb	229	957	633	368	690	2877
gsb-n	820	1596	1739	449	1582	6186
gt	191	648	448	125	414	1826
ham	128	563	298	139	293	1421
hb	341	1469	610	875	401	3696
hbn	91	2312	203	874	253	3733
her	351	2205	970	1266	1154	5946
hkb	877	2944	2061	1314	2283	9479
hng1	288	1732	809	555	886	4270
hng2	148	496	413	148	405	1610
hth	843	237	1491	152	904	3627
ind	475	2113	1197	313	1256	5354
insv	1971	4456	3922	7875	3902	22126
inv	125	2022	293	734	219	3393
jigr1	239	817	550	167	482	2255
jim	121	508	331	421	383	1764
jing	651	1192	1582	350	1351	5126
jumu	252	1555	638	374	688	3507
kay	539	2646	1469	1007	2089	7750
ken	593	3073	1429	1176	1321	7592
klu	274	1213	663	267	676	3093
kmg	168	1003	459	145	498	2273
kni	1257	2062	2760	1272	3116	10467
knrl	315	2741	564	930	395	4945
l(1)sc	320	3391	778	2276	995	7760
l(3)neo38	1066	1122	2405	549	2077	7219
lab	1497	2291	3351	889	3552	11580
lbe	284	1648	671	457	778	3838
lilli	501	2885	1290	792	1531	6999
lmd	680	2009	1675	419	1584	6367
lms	842	3002	2032	582	2117	8575
lola	2561	8048	6014	3181	5859	25663
lov	508	1223	1182	816	1069	4798
luna	67	706	173	132	234	1312
lz	851	2440	1947	467	1907	7612
maf-S	225	1564	632	364	733	3518
mid	205	3013	489	1943	666	6316
mirr	850	2283	1984	1193	2656	8966
mld	153	1368	328	839	286	2974
nau	653	1637	1684	833	2064	6871
nerfin-1	1245	2900	2604	1618	2765	11132
nerfin-2	179	1649	369	837	324	3358
net	1243	2040	2814	778	2977	9852
nom	745	2193	1772	1558	2220	8488
nub	260	3331	674	2093	819	7177
oc	1286	1720	2814	660	2565	9045
odd	447	1375	1159	470	1363	4814
onecut	648	2115	1602	913	1930	7208
org-1	317	1108	866	222	1003	3516
otp	517	1355	1258	598	1317	5045
ouib	597	1317	1400	259	1447	5020
ovo	114	1180	308	480	546	2628
p53	122	867	311	250	351	1901
pad	454	3128	1398	1352	1870	8202
pan	941	2569	2379	971	2302	9162
pb	190	1036	541	425	618	2810
pdm2	82	1112	153	663	184	2194
pdm3	1181	1833	2468	350	2426	8258
peb	266	1017	669	196	693	2841
pho	193	1720	547	338	658	3456
phol	1442	4556	3352	1528	3004	13882
pita	304	918	546	364	226	2358
pnt	316	1328	795	231	809	3479
prd	1230	2550	2613	881	2150	9424
prg	141	1401	444	315	504	2805
pros	1864	1969	4063	1139	3759	12794
psq	2389	6777	5877	3772	6812	25627
pzg	257	5049	551	2157	666	8680
ranshi	496	1821	1288	468	1286	5359
repo	187	1110	516	358	599	2770
rgr	800	2433	1790	826	1971	7820
rib	280	1433	849	941	1103	4606
rn	403	1078	1001	244	1048	3774
ro	192	687	454	118	432	1883
row	1394	4522	3300	940	3129	13285
run	436	1031	945	308	1031	3751
sage	212	866	528	194	649	2449
salm	495	1653	1240	566	1511	5465
salr	2224	2986	4883	797	4640	15530
sc	295	998	817	222	846	3178
schlank	151	806	443	186	550	2136
scro	141	2198	321	987	377	4024
scrt	1068	2056	2412	967	2406	8909
sd	1894	3125	4421	1714	5463	16617
sens	249	1070	633	230	676	2858
sens-2	310	976	808	290	761	3145
seq	492	1552	1320	587	1335	5286
shn	225	1461	657	378	702	3423
sim	270	820	687	247	658	2682
sima	91	510	249	112	275	1237
sisA	615	1701	1508	382	1353	5559
slbo	830	2996	2009	866	2015	8716
slou	215	1363	518	188	542	2826
slp1	73	2159	169	757	213	3371
slp2	198	1120	537	207	597	2659
sna	147	2167	361	1148	398	4221
so	478	1539	1292	699	1364	5372
sob	536	2581	1413	944	1527	7001
sqz	974	1625	2471	959	2685	8714
sr	449	1100	1256	788	1439	5032
ss	3147	3897	6849	2407	6703	23003
ssp	455	1965	1136	400	963	4919
stc	491	1508	1190	533	1362	5084
stwl	704	4163	1291	1103	909	8170
su(Hw)	912	2603	2024	1029	1778	8346
sug	941	4141	2526	1951	3429	12988
sv	243	1768	682	293	756	3742
svp	1268	1902	2663	1019	2828	9680
tHMG1	178	1616	584	402	829	3609
tai	273	759	632	193	715	2572
tap	396	1262	1018	269	1100	4045
term	1	58	8	21	2	90
tgo	572	1911	1475	352	1483	5793
tin	445	2144	1125	367	1098	5179
tio	536	1172	1367	159	1363	4597
tj	1135	3107	2737	2390	4468	13837
tll	1254	2655	2606	1307	2168	9990
toe	215	1742	606	422	657	3642
topi	962	2276	2150	619	2120	8127
toy	156	740	389	157	441	1883
trem	398	3595	909	799	835	6536
trh	121	818	339	112	363	1753
ttk	502	1442	1234	343	1170	4691
tup	114	730	307	121	343	1615
twi	1203	2498	2621	873	2464	9659
tx	201	1401	548	281	588	3019
unc-4	114	2964	288	1193	362	4921
unpg	1043	2627	2632	857	2684	9843
ush	312	2357	741	1678	941	6029
usp	1953	4023	4699	3507	6280	20462
vnd	254	1945	460	737	392	3788
vri	1323	2766	3120	1674	4026	12909
vvl	1247	3261	2905	1294	2984	11691
wdn	252	1287	655	325	729	3248
wek	247	1231	661	614	829	3582
woc	966	2827	2270	734	2290	9087
wor	293	1012	818	154	784	3061
z	450	1063	1210	690	1037	4450
zen	1373	3245	2863	1104	2220	10805
zen2	142	1813	377	677	271	3280
zf30C	867	1239	1944	716	1679	6445
zfh1	863	2098	1863	954	1680	7458
zfh2	209	2263	644	412	802	4330
zld	178	1652	504	407	559	3300
Total	341551	1166265	817111	452072	853716	3630715

## Sheet: s2.Fly_peaks_all peaks_fraction
TF 3P 5P<=500 5P>500 Exon Intron Total
ATbp 0.1025 0.2495 0.2759 0.0543 0.3178 4292
Abd-B 0.0912 0.3830 0.2307 0.0682 0.2270 5428
Adf1 0.0565 0.3959 0.1759 0.1776 0.1940 5607
Aef1 0.0742 0.3802 0.2120 0.0982 0.2354 4948
Antp 0.0843 0.4081 0.1969 0.1045 0.2062 4068
Asciz 0.1056 0.2479 0.2615 0.0648 0.3202 4119
Atf-2 0.0802 0.4017 0.2174 0.0775 0.2232 2980
Atf3 0.0770 0.4176 0.2160 0.0786 0.2108 2519
Atf6 0.0754 0.3226 0.2053 0.1331 0.2636 5846
Awh 0.1232 0.2266 0.2743 0.0914 0.2845 5811
B-H1 0.0866 0.3577 0.2338 0.0624 0.2595 3464
B-H2 0.0508 0.4850 0.1437 0.1357 0.1849 3862
Bdp1 0.0836 0.3938 0.2093 0.1075 0.2058 3339
Blimp-1 0.1178 0.2010 0.2879 0.0867 0.3067 19329
BtbVII 0.0786 0.3481 0.2038 0.1057 0.2638 3131
BuGZ 0.0576 0.4691 0.1432 0.1432 0.1871 1390
C15 0.0841 0.3799 0.2135 0.0900 0.2325 2211
CG10147 0.0723 0.4011 0.1941 0.1169 0.2157 4261
CG10209 0.0941 0.3405 0.2509 0.0548 0.2596 4854
CG1024 0.0952 0.3611 0.2347 0.0945 0.2146 3980
CG10274 0.0619 0.3672 0.2358 0.0732 0.2620 2214
CG10321 0.0891 0.3124 0.2314 0.1169 0.2502 3457
CG10348 0.1018 0.3085 0.2589 0.0605 0.2704 1916
CG10366 0.0936 0.3508 0.2455 0.0652 0.2449 5140
CG10431 0.0755 0.3525 0.1994 0.1309 0.2418 3867
CG10462 0.0727 0.4449 0.1964 0.0767 0.2093 2724
CG10543 0.0672 0.3445 0.1802 0.1580 0.2502 5672
CG10631 0.1534 0.1882 0.3310 0.0388 0.2885 12047
CG10654 0.0754 0.4421 0.2018 0.0592 0.2215 3766
CG10669 0.1386 0.2049 0.3083 0.0550 0.2933 7532
CG10949 0.0288 0.5858 0.0734 0.2272 0.0847 4590
CG10959 0.1223 0.2888 0.2847 0.0781 0.2262 3418
CG10979 0.1088 0.2691 0.2526 0.1198 0.2497 11873
CG11085 0.0880 0.4197 0.2074 0.0954 0.1895 3124
CG11093 0.1080 0.2975 0.2539 0.0887 0.2519 3529
CG11247 0.0889 0.3604 0.2191 0.1119 0.2197 4478
CG11294 0.1003 0.2768 0.2706 0.0578 0.2946 4328
CG11398 0.0749 0.3583 0.1900 0.1348 0.2420 2752
CG11456 0.1136 0.2845 0.2540 0.1588 0.1891 6637
CG11504 0.1421 0.2082 0.3202 0.0638 0.2657 13689
CG11560 0.1041 0.3925 0.2177 0.1090 0.1767 3294
CG11617 0.0464 0.3788 0.1373 0.2074 0.2300 9757
CG11695 0.0895 0.2945 0.2380 0.0957 0.2823 5976
CG11696 0.0987 0.2820 0.2442 0.0848 0.2903 3727
CG11723 0.0654 0.4173 0.1933 0.1018 0.2222 3331
CG11902 0.1098 0.3054 0.2761 0.0437 0.2649 4552
CG11906 0.0488 0.4273 0.1074 0.2874 0.1291 8949
CG11966 0.0228 0.5775 0.0466 0.2735 0.0795 3283
CG12071 0.1015 0.2394 0.2584 0.1138 0.2868 6098
CG12104 0.0642 0.4615 0.1864 0.0557 0.2322 2494
CG12155 0.0633 0.4588 0.1741 0.0981 0.2058 5249
CG12219 0.0907 0.3066 0.2454 0.0802 0.2772 3904
CG12236 0.0801 0.3610 0.2226 0.0886 0.2477 2471
CG12299 0.0609 0.4149 0.1714 0.1386 0.2143 2562
CG1233 0.0857 0.3295 0.2364 0.0787 0.2697 4738
CG12391 0.1024 0.3501 0.2363 0.0810 0.2303 11300
CG12605 0.0950 0.2649 0.2367 0.1297 0.2738 7010
CG12744 0.0716 0.4373 0.1836 0.1098 0.1976 3142
CG12768 0.0482 0.4112 0.1525 0.1499 0.2382 3069
CG12769 0.1074 0.1884 0.2784 0.1137 0.3121 14692
CG12942 0.0702 0.4510 0.1942 0.0642 0.2205 3692
CG13123 0.0778 0.4153 0.1954 0.0889 0.2225 4252
CG13204 0.1478 0.1419 0.3122 0.1046 0.2935 11163
CG13287 0.0357 0.5504 0.0842 0.2435 0.0862 7031
CG13296 0.0807 0.3091 0.2222 0.1266 0.2613 8311
CG13775 0.0768 0.4134 0.2007 0.1009 0.2082 5172
CG13894 0.1321 0.2280 0.2716 0.1000 0.2683 9910
CG13897 0.0911 0.3232 0.2452 0.0967 0.2437 3205
CG14014 0.0807 0.3411 0.2189 0.1054 0.2539 5675
CG14050 0.0862 0.3634 0.2276 0.0703 0.2526 3528
CG14441 0.0875 0.3211 0.2396 0.0911 0.2607 5815
CG14655 0.1576 0.1520 0.3443 0.0378 0.3083 9717
CG14667 0.1038 0.3517 0.2506 0.0584 0.2355 3460
CG14710 0.0946 0.3766 0.2058 0.1291 0.1939 13399
CG14711 0.0377 0.5027 0.1298 0.1345 0.1953 3897
CG14860 0.0745 0.4915 0.1283 0.2073 0.0985 3758
CG14965 0.0959 0.3251 0.2481 0.0959 0.2349 1209
CG15011 0.1070 0.2549 0.2760 0.0595 0.3026 5026
CG15073 0.0714 0.4197 0.2131 0.0826 0.2131 1065
CG15269 0.1078 0.2466 0.2754 0.0777 0.2924 9404
CG1529 0.1023 0.3009 0.2523 0.0648 0.2797 3686
CG15336 0.1145 0.2130 0.2760 0.0981 0.2984 10787
CG15436 0.0238 0.6558 0.0597 0.2014 0.0594 3367
CG15514 0.0545 0.5046 0.1347 0.1450 0.1613 6758
CG15601 0.0950 0.3593 0.2232 0.1014 0.2211 6971
CG15696 0.1108 0.3595 0.2470 0.0563 0.2264 4757
CG15710 0.1212 0.2464 0.2794 0.0836 0.2694 11457
CG15812 0.0631 0.4101 0.1665 0.1650 0.1954 2631
CG1602 0.0851 0.4106 0.2251 0.0508 0.2283 3994
CG1603 0.1003 0.3379 0.2443 0.0978 0.2197 10086
CG1620 0.0323 0.6140 0.0880 0.1337 0.1320 3000
CG1647 0.0740 0.4399 0.1826 0.0925 0.2109 2864
CG1663 0.1486 0.1955 0.3195 0.0612 0.2753 12580
CG16779 0.1059 0.2294 0.2593 0.1375 0.2679 12401
CG16813 0.0784 0.4936 0.1343 0.2071 0.0865 5316
CG16815 0.0986 0.3871 0.2424 0.0455 0.2264 3317
CG16863 0.0827 0.3845 0.2135 0.0880 0.2313 3592
CG17186 0.0322 0.6230 0.0871 0.1609 0.0967 2915
CG17328 0.1051 0.2956 0.2621 0.1018 0.2354 6147
CG17359 0.1033 0.2734 0.2591 0.0938 0.2704 9524
CG17361 0.1019 0.3341 0.2516 0.0787 0.2336 8878
CG17385 0.0722 0.3187 0.2051 0.1520 0.2520 6084
CG17568 0.0938 0.2349 0.2600 0.1175 0.2938 5650
CG17612 0.0961 0.3643 0.2148 0.0924 0.2324 2207
CG17801 0.0520 0.3939 0.1348 0.1952 0.2241 5369
CG17802 0.0751 0.4433 0.2104 0.0891 0.1821 2795
CG17806 0.1324 0.2248 0.2899 0.0691 0.2838 10568
CG17829 0.0925 0.3813 0.2069 0.1187 0.2006 10551
CG1792 0.0639 0.4037 0.1937 0.1153 0.2235 2958
CG18011 0.0718 0.4630 0.1660 0.1313 0.1679 2620
CG18262 0.1168 0.2733 0.2703 0.0877 0.2519 12795
CG18476 0.0798 0.4308 0.2053 0.0634 0.2207 2932
CG18599 0.1397 0.2046 0.2975 0.0710 0.2872 10966
CG18764 0.0754 0.4342 0.2022 0.0725 0.2157 3685
CG2116 0.0343 0.6174 0.0943 0.1517 0.1024 5867
CG2120 0.0862 0.3771 0.2091 0.0917 0.2360 9274
CG2129 0.0213 0.6709 0.0324 0.2420 0.0334 2066
CG2199 0.1133 0.1965 0.2744 0.1464 0.2693 8127
CG2202 0.0936 0.3184 0.2330 0.1135 0.2415 4915
CG2678 0.1161 0.2389 0.2767 0.0816 0.2867 11281
CG2712 0.1105 0.3412 0.2471 0.0770 0.2242 10848
CG2889 0.0948 0.3320 0.2412 0.1081 0.2240 3081
CG30020 0.0701 0.4293 0.1520 0.1838 0.1647 8926
CG3032 0.1129 0.2928 0.2656 0.0770 0.2516 9450
CG30403 0.0910 0.3817 0.2274 0.0669 0.2330 7949
CG30431 0.1052 0.3361 0.2671 0.0506 0.2409 3478
CG3065 0.0770 0.4223 0.2169 0.0881 0.1957 2453
CG31224 0.0890 0.3633 0.2247 0.0819 0.2412 3810
CG31365 0.0826 0.3450 0.2185 0.1265 0.2275 2664
CG31388 0.0638 0.4762 0.1938 0.0625 0.2037 1615
CG31441 0.1172 0.3031 0.2712 0.0586 0.2500 7408
CG31627 0.1123 0.3243 0.2576 0.0534 0.2525 7241
CG3163 0.0609 0.4026 0.1859 0.1622 0.1884 4826
CG32006 0.1497 0.1659 0.3340 0.0395 0.3108 11463
CG32121 0.0945 0.2553 0.2449 0.1128 0.2925 8452
CG32532 0.0863 0.3659 0.2041 0.1184 0.2252 7717
CG32767 0.0790 0.3244 0.2181 0.1212 0.2573 4621
CG32772 0.1053 0.3045 0.2514 0.0841 0.2548 5032
CG3281 0.0707 0.3415 0.2050 0.1178 0.2650 6181
CG33017 0.0429 0.4478 0.1519 0.1187 0.2386 3403
CG33213 0.0745 0.4813 0.1628 0.1219 0.1595 4883
CG33557 0.0859 0.3506 0.2224 0.1163 0.2249 4892
CG3407 0.1040 0.3065 0.2559 0.0552 0.2784 3423
CG34224 0.0325 0.5375 0.0799 0.2531 0.0970 4958
CG34367 0.1283 0.2434 0.2767 0.0663 0.2854 5884
CG34376 0.0613 0.3452 0.1572 0.1960 0.2403 8352
CG3726 0.1182 0.2705 0.2592 0.1274 0.2247 3164
CG3838 0.0672 0.4536 0.1790 0.1011 0.1992 1682
CG3847 0.0709 0.4584 0.1789 0.1127 0.1791 6148
CG3919 0.1369 0.2279 0.2867 0.0818 0.2667 8846
CG3995 0.0333 0.5813 0.0890 0.1823 0.1141 3752
CG42726 0.0614 0.4092 0.1246 0.3255 0.0793 4022
CG42741 0.0364 0.4733 0.0879 0.2840 0.1184 9191
CG4282 0.0534 0.4448 0.1541 0.1690 0.1787 2154
CG4318 0.1476 0.1682 0.3443 0.0269 0.3130 7776
CG4328 0.0729 0.4275 0.1801 0.1024 0.2171 2704
CG43347 0.0768 0.4341 0.2031 0.0581 0.2279 4766
CG4360 0.0922 0.1947 0.2396 0.2164 0.2571 6193
CG43689 0.0829 0.3482 0.2333 0.0820 0.2536 2062
CG44002 0.1238 0.2557 0.2845 0.0581 0.2779 7493
CG4404 0.1150 0.3155 0.2720 0.0811 0.2164 3835
CG4424 0.0929 0.3829 0.2300 0.0629 0.2314 5169
CG4496 0.1155 0.2247 0.2690 0.1281 0.2627 12729
CG4617 0.0161 0.4116 0.0414 0.4297 0.1012 4536
CG4707 0.0845 0.2810 0.2625 0.0945 0.2775 3513
CG4730 0.0969 0.3382 0.2540 0.0625 0.2484 3551
CG4820 0.0879 0.3906 0.2317 0.0569 0.2330 3902
CG4854 0.0619 0.4102 0.1739 0.1338 0.2202 3796
CG4936 0.0368 0.4905 0.0878 0.2814 0.1036 7754
CG5180 0.0963 0.2716 0.2530 0.1268 0.2524 5309
CG5245 0.0883 0.3880 0.2262 0.0687 0.2288 3523
CG5953 0.0887 0.3008 0.2343 0.1359 0.2403 3304
CG6163 0.1219 0.2073 0.2787 0.1111 0.2811 12441
CG6254 0.1057 0.3106 0.2524 0.0766 0.2546 2714
CG6272 0.0908 0.4274 0.1920 0.1071 0.1827 3568
CG6276 0.1217 0.1752 0.2993 0.0701 0.3337 8036
CG6654 0.0915 0.3610 0.2376 0.0615 0.2484 2130
CG6683 0.0585 0.4005 0.1758 0.1404 0.2247 3725
CG6689 0.1090 0.3006 0.2656 0.0676 0.2572 6434
CG6765 0.0604 0.4092 0.1751 0.1128 0.2425 2004
CG6791 0.0809 0.4218 0.1527 0.2330 0.1117 6072
CG6808 0.1241 0.2108 0.2853 0.0884 0.2914 7791
CG6813 0.1126 0.2453 0.2792 0.0520 0.3109 3811
CG7101 0.0505 0.4636 0.1431 0.1310 0.2118 6199
CG7271 0.0884 0.4232 0.1951 0.1165 0.1768 1640
CG7357 0.0961 0.3405 0.2451 0.0840 0.2343 4452
CG7368 0.1142 0.2577 0.2753 0.0675 0.2853 5612
CG7372 0.1077 0.3177 0.2550 0.0659 0.2537 4781
CG7691 0.0244 0.6321 0.0547 0.2191 0.0697 3199
CG7745 0.1128 0.2447 0.2476 0.1387 0.2561 3049
CG7786 0.0651 0.4344 0.1927 0.0917 0.2161 3720
CG7963 0.0610 0.5217 0.1093 0.2240 0.0839 3312
CG7987 0.0725 0.3239 0.1864 0.1831 0.2340 6727
CG8089 0.0796 0.3692 0.2095 0.1081 0.2336 3164
CG8119 0.1274 0.1995 0.2908 0.0833 0.2991 10603
CG8159 0.1484 0.1982 0.3169 0.0601 0.2763 12652
CG8281 0.1105 0.2629 0.2717 0.0649 0.2900 4100
CG8301 0.1306 0.1834 0.3073 0.0659 0.3128 10685
CG8319 0.1144 0.2926 0.2608 0.0621 0.2700 4203
CG8388 0.1097 0.3040 0.2654 0.0632 0.2577 6096
CG8478 0.0672 0.3906 0.1685 0.2210 0.1527 6766
CG8765 0.0988 0.3784 0.2389 0.0956 0.1883 2825
CG8924 0.0961 0.2842 0.2316 0.1404 0.2477 12824
CG8944 0.0757 0.4200 0.2014 0.0883 0.2146 3238
CG9215 0.0857 0.3980 0.2184 0.0865 0.2115 4048
CG9609 0.0745 0.4351 0.1959 0.0920 0.2025 3477
CG9727 0.0997 0.3243 0.2424 0.0819 0.2516 7079
CG9876 0.0687 0.4688 0.1769 0.1026 0.1831 2272
CG9932 0.0787 0.4088 0.2011 0.1098 0.2015 7294
CG9948 0.1445 0.2110 0.3136 0.0458 0.2850 9361
CHES-1-like 0.0427 0.4728 0.1384 0.1767 0.1694 3583
CTCF 0.1317 0.3465 0.2388 0.1525 0.1306 12827
CTPsyn 0.0893 0.2741 0.2138 0.1781 0.2448 9823
Camta 0.0770 0.4074 0.2009 0.0866 0.2280 3245
Cf2 0.0286 0.4537 0.0781 0.3240 0.1156 3253
CkIIα-i1 0.0823 0.3879 0.2091 0.0813 0.2394 923
Clamp 0.1211 0.1111 0.2818 0.3101 0.1758 6597
Clk 0.0370 0.5343 0.1386 0.0969 0.1931 1486
CoRest 0.0931 0.3871 0.2360 0.0661 0.2177 8848
Coop 0.1113 0.2344 0.2535 0.1566 0.2441 8200
CrebA 0.0933 0.2729 0.2350 0.1152 0.2836 6302
CrebB 0.0637 0.3898 0.1871 0.1344 0.2250 2827
Crg-1 0.0452 0.5156 0.1095 0.1518 0.1779 2147
D 0.1168 0.2606 0.2792 0.0873 0.2561 5096
D1 0.1301 0.2040 0.3105 0.0876 0.2677 5778
D19A 0.1239 0.2226 0.2893 0.0809 0.2833 11315
D19B 0.0866 0.3599 0.2354 0.0632 0.2550 3165
Dbx 0.0747 0.3808 0.1741 0.1782 0.1921 6386
Deaf1 0.0961 0.2783 0.2363 0.1658 0.2235 15190
Dfd 0.1697 0.1836 0.2903 0.1860 0.1704 2952
Dif 0.0620 0.3797 0.1896 0.1753 0.1934 2647
Dip2 0.1275 0.3912 0.2560 0.0703 0.1549 910
Dlip3 0.0563 0.4973 0.1653 0.0808 0.2003 3195
Dll 0.0575 0.4438 0.1179 0.2613 0.1195 7600
Doc2 0.0944 0.3741 0.2308 0.0822 0.2185 1144
Doc3 0.0305 0.5637 0.0773 0.2512 0.0773 3507
Dp 0.0464 0.5213 0.1007 0.2207 0.1108 12020
Dref 0.0588 0.6024 0.1209 0.1537 0.0641 5523
Drgx 0.1072 0.2353 0.2686 0.0951 0.2937 8443
E(bx) 0.0607 0.4975 0.1379 0.1917 0.1122 12497
E(spl)m3-HLH 0.0907 0.3935 0.2291 0.0515 0.2352 4600
E(spl)m5-HLH 0.0974 0.3136 0.2428 0.1225 0.2237 1837
E(spl)m7-HLH 0.0901 0.3441 0.2311 0.0840 0.2507 2453
E(spl)m8-HLH 0.1247 0.2727 0.2692 0.0797 0.2536 8001
E(spl)mbeta-HLH 0.0945 0.2903 0.2307 0.1336 0.2508 21595
E(spl)mdelta-HLH 0.0842 0.2830 0.2117 0.2239 0.1973 2792
E(spl)mgamma-HLH 0.0813 0.4182 0.2200 0.0545 0.2260 4168
E(var)3-9 0.0688 0.4589 0.1961 0.0574 0.2188 2820
E2f1 0.0905 0.3426 0.2313 0.0901 0.2456 5163
E2f2 0.0615 0.4950 0.1465 0.1441 0.1530 8752
ERR 0.0591 0.3889 0.1620 0.1745 0.2155 4024
EcR 0.1123 0.1543 0.2630 0.1481 0.3224 20181
Eip74EF 0.0844 0.2700 0.2332 0.1237 0.2886 7414
Eip75B 0.1213 0.2363 0.2734 0.0791 0.2898 9271
Eip78C 0.1333 0.2250 0.2974 0.0590 0.2852 8505
Eip93F 0.0914 0.3451 0.2244 0.0924 0.2465 1947
Ets21C 0.1120 0.3195 0.2626 0.0479 0.2580 4535
Ets65A 0.0644 0.4804 0.1793 0.0928 0.1832 3029
Ets96B 0.1326 0.2279 0.2978 0.0697 0.2721 10146
Ets97D 0.0469 0.6053 0.1058 0.1392 0.1027 5207
Ets98B 0.0971 0.2721 0.2394 0.1160 0.2755 8788
Fer1 0.0709 0.3375 0.1843 0.1726 0.2347 8632
Fer2 0.0660 0.4713 0.1798 0.0767 0.2063 2909
Fer3 0.0832 0.3569 0.2256 0.0791 0.2552 5447
FoxK 0.0184 0.5476 0.0648 0.2748 0.0945 3101
FoxL1 0.1010 0.2370 0.2591 0.1069 0.2960 3088
FoxP 0.1084 0.2364 0.2592 0.1064 0.2896 7234
GATAd 0.0709 0.4478 0.1693 0.1024 0.2096 1016
GATAe 0.0693 0.3532 0.1893 0.1046 0.2836 3032
Gsc 0.1306 0.3116 0.2830 0.0565 0.2184 1470
Gug 0.1021 0.3201 0.2511 0.0693 0.2575 10238
H15 0.1118 0.3122 0.2553 0.0869 0.2338 4375
H2.0 0.0957 0.3573 0.2386 0.0723 0.2361 4565
HGTX 0.0433 0.4216 0.1028 0.2999 0.1323 6506
HHEX 0.0870 0.3344 0.2297 0.0792 0.2697 4067
HLH3B 0.0988 0.3064 0.2553 0.0829 0.2565 5812
HLH4C 0.0643 0.4705 0.1209 0.2424 0.1019 5144
HLH54F 0.0583 0.4934 0.1703 0.0856 0.1924 3857
Hand 0.0698 0.3586 0.2090 0.1175 0.2451 2766
Hey 0.1328 0.2350 0.2788 0.0901 0.2632 3583
HmgD 0.0499 0.4769 0.1422 0.1951 0.1359 2988
HmgZ 0.0550 0.4670 0.1441 0.1583 0.1756 7023
Hmx 0.0574 0.4494 0.1875 0.0837 0.2220 1829
Hnf4 0.0908 0.3336 0.2091 0.1204 0.2461 6762
Hr3 0.0779 0.4315 0.2119 0.0568 0.2219 4827
Hr38 0.0707 0.3980 0.1842 0.0938 0.2533 608
Hr39 0.1349 0.2399 0.2939 0.0747 0.2566 8584
Hr4 0.1341 0.2179 0.3047 0.0402 0.3031 8403
Hr51 0.1157 0.2894 0.2655 0.0737 0.2556 13578
Hr78 0.1081 0.2053 0.2627 0.1032 0.3208 11390
Hr83 0.0604 0.4181 0.1501 0.1741 0.1972 3377
Hr96 0.0574 0.4372 0.1727 0.1306 0.2021 3330
Hsf 0.0825 0.4206 0.2083 0.0733 0.2151 5318
Jra 0.0655 0.4005 0.1674 0.1424 0.2243 3758
Kah 0.0659 0.3401 0.1826 0.1626 0.2488 3734
Klf15 0.0645 0.4346 0.1748 0.1161 0.2099 4650
Kr 0.1434 0.1728 0.3382 0.0676 0.2779 1360
Kr-h1 0.0438 0.4356 0.1091 0.2712 0.1403 8356
Lim3 0.0851 0.3571 0.2561 0.0616 0.2401 1445
M1BP 0.0208 0.5891 0.0509 0.2671 0.0721 4950
MBD-R2 0.0379 0.3855 0.1012 0.3451 0.1303 7543
MESR4 0.0285 0.2451 0.0692 0.5061 0.1511 11219
MTF-1 0.0837 0.3246 0.2171 0.1196 0.2551 2474
Mabi 0.1067 0.2051 0.2400 0.1804 0.2677 9390
Mad 0.0629 0.4717 0.1686 0.1072 0.1897 3369
Max 0.0548 0.4707 0.1462 0.1469 0.1814 4179
Med 0.0802 0.3897 0.2066 0.1167 0.2068 6094
Mef2 0.0653 0.3478 0.1484 0.2456 0.1929 10570
Meics 0.0924 0.3219 0.2425 0.0799 0.2634 6624
Mes2 0.0527 0.4047 0.1693 0.2078 0.1655 2864
Met 0.1359 0.2227 0.3002 0.0566 0.2846 9358
Mnt 0.0307 0.4236 0.0851 0.2804 0.1803 5935
Mondo 0.0568 0.4928 0.1498 0.1002 0.2004 968
Mrtf 0.1136 0.3082 0.2607 0.0883 0.2292 3997
Myb 0.0529 0.5675 0.1182 0.1462 0.1153 5501
Myc 0.0659 0.4475 0.1537 0.1969 0.1360 6870
NC2alpha 0.0749 0.4035 0.2010 0.1117 0.2089 2015
NC2beta 0.0653 0.4026 0.1803 0.1574 0.1944 4809
NFAT 0.0690 0.4152 0.1798 0.1562 0.1798 4899
NK7.1 0.0698 0.4248 0.1924 0.0862 0.2268 1949
Neu2 0.0878 0.3823 0.1888 0.1585 0.1826 1287
Nf-YA 0.0853 0.3244 0.2412 0.1067 0.2424 3354
Nf-YB 0.1124 0.2795 0.2763 0.1041 0.2277 9834
NfI 0.0776 0.3849 0.2186 0.0882 0.2306 5736
Oaz 0.0851 0.3654 0.2392 0.0750 0.2352 2772
OdsH 0.1206 0.2632 0.2746 0.0665 0.2750 14667
Oli 0.1226 0.2557 0.3002 0.0441 0.2774 7552
Opbp 0.0588 0.4626 0.1242 0.2671 0.0873 5661
Optix 0.1085 0.3017 0.2530 0.0991 0.2376 3510
PHDP 0.0952 0.3013 0.2383 0.1002 0.2650 9639
Pdp1 0.0873 0.2910 0.2166 0.1304 0.2748 17288
Plzf 0.1234 0.2714 0.2741 0.0604 0.2707 7288
Poxn 0.0656 0.4576 0.1891 0.0787 0.2091 1449
Ptx1 0.1103 0.3059 0.2678 0.0553 0.2607 7415
REPTOR 0.0613 0.4229 0.1616 0.1567 0.1975 5533
REPTOR-BP 0.0760 0.4064 0.2129 0.0644 0.2403 3866
Rel 0.0861 0.2787 0.2011 0.1708 0.2633 14684
Rfx 0.0816 0.3614 0.2091 0.1211 0.2267 9247
RunxB 0.0312 0.5754 0.0781 0.2233 0.0921 3497
Rx 0.0987 0.3386 0.2489 0.0774 0.2363 3423
SREBP 0.1128 0.3250 0.2529 0.0727 0.2366 8499
Scr 0.0422 0.5520 0.0854 0.2371 0.0834 5741
Sidpn 0.0479 0.4814 0.1286 0.1921 0.1500 7992
Six4 0.0825 0.4009 0.2278 0.0618 0.2270 3674
Smox 0.1479 0.2142 0.3133 0.0555 0.2691 10844
Snoo 0.1008 0.2949 0.2412 0.1104 0.2529 8119
Sox100B 0.1029 0.2775 0.2619 0.0673 0.2905 6747
Sox102F 0.1355 0.2046 0.3045 0.0619 0.2936 19965
Sox14 0.1034 0.2928 0.2332 0.1104 0.2602 8894
Sox15 0.1068 0.3259 0.2604 0.0469 0.2599 4240
SoxN 0.0495 0.4700 0.1336 0.2077 0.1391 4602
Sp1 0.1020 0.2745 0.2375 0.1422 0.2438 11450
Spps 0.0987 0.3533 0.2312 0.0806 0.2362 3213
Sry-beta 0.0607 0.4624 0.1727 0.1484 0.1558 3248
Sry-delta 0.0489 0.4909 0.1200 0.2037 0.1365 9418
Stat92E 0.0757 0.3350 0.1770 0.2218 0.1905 6180
Su(H) 0.0968 0.1539 0.2213 0.3000 0.2279 25228
TFAM 0.0789 0.3532 0.2435 0.0658 0.2586 1458
TfAP-2 0.0239 0.5875 0.0544 0.2633 0.0709 4611
Trl 0.0828 0.2812 0.2250 0.1661 0.2449 26353
Usf 0.0733 0.4565 0.2082 0.0629 0.1991 2320
Vsx1 0.0966 0.2569 0.2419 0.0994 0.3051 5402
Vsx2 0.1145 0.2874 0.2752 0.1248 0.1981 2140
Xbp1 0.0872 0.4063 0.2205 0.0687 0.2172 6081
Xrp1 0.1201 0.2762 0.2675 0.0705 0.2657 8733
ZIPIC 0.0410 0.6112 0.1025 0.1236 0.1217 1610
Zif 0.0837 0.4245 0.1900 0.1273 0.1744 11250
ab 0.0705 0.4241 0.1918 0.0833 0.2302 1872
abd-A 0.1861 0.1061 0.3534 0.0578 0.2966 14000
ac 0.1126 0.2676 0.2548 0.1150 0.2501 3375
achi 0.1335 0.2407 0.2903 0.0612 0.2742 8993
acj6 0.1339 0.2425 0.3044 0.0399 0.2793 8214
al 0.0720 0.4349 0.1952 0.0704 0.2276 3822
amos 0.0575 0.5325 0.1092 0.2311 0.0697 5825
aop 0.0857 0.3664 0.2323 0.1117 0.2039 1692
ap 0.0976 0.3275 0.2600 0.0566 0.2584 3289
apt 0.0353 0.5550 0.0833 0.2372 0.0892 4047
ara 0.1188 0.2583 0.2656 0.1144 0.2429 5471
ase 0.0969 0.3306 0.2496 0.0873 0.2357 4171
ato 0.0427 0.5273 0.0878 0.2695 0.0726 3347
az2 0.0935 0.3784 0.2390 0.0506 0.2384 4878
bab1 0.0544 0.3799 0.1256 0.2487 0.1914 9473
bab2 0.0849 0.3966 0.2115 0.0710 0.2360 3674
bap 0.0266 0.5481 0.0593 0.2881 0.0779 4890
bbx 0.0438 0.4727 0.1057 0.2825 0.0952 5798
bcd 0.0821 0.3991 0.2212 0.0615 0.2360 4728
bigmax 0.0542 0.3637 0.1148 0.2321 0.2351 2029
bin 0.0325 0.5034 0.0805 0.2871 0.0966 3417
bowl 0.0778 0.3512 0.2043 0.1333 0.2334 2198
br 0.0906 0.3043 0.2246 0.1285 0.2520 9826
brk 0.1064 0.2965 0.2380 0.0899 0.2693 6685
bs 0.0325 0.5512 0.0965 0.2121 0.1077 3202
bsh 0.1129 0.2472 0.2680 0.0927 0.2792 16550
btn 0.0863 0.3658 0.2230 0.0857 0.2392 1785
cad 0.1453 0.1596 0.3366 0.1055 0.2530 2237
cas 0.0654 0.4731 0.1631 0.1120 0.1864 2232
cato 0.0714 0.4513 0.1951 0.0629 0.2194 2466
caup 0.0831 0.3504 0.2069 0.1063 0.2533 5220
cbt 0.0902 0.2831 0.2465 0.1076 0.2726 4702
cg 0.1099 0.1500 0.2670 0.1599 0.3132 16984
chinmo 0.0837 0.2506 0.2195 0.1766 0.2696 13848
chn 0.0744 0.4182 0.2057 0.0973 0.2044 3845
ci 0.0979 0.2568 0.2396 0.1671 0.2386 10658
cic 0.0598 0.2995 0.1571 0.2098 0.2739 10576
cnc 0.0746 0.2954 0.1899 0.1644 0.2757 8139
crc 0.0642 0.4213 0.1988 0.0761 0.2396 1932
croc 0.1035 0.3400 0.2662 0.0538 0.2366 3644
crol 0.1261 0.1428 0.3130 0.1006 0.3175 10062
crp 0.0272 0.5429 0.0779 0.2267 0.1254 7434
cwo 0.0928 0.2525 0.2441 0.1068 0.3038 9405
cyc 0.1153 0.3201 0.2576 0.0589 0.2481 6929
da 0.0705 0.4287 0.1858 0.1107 0.2044 1717
dac 0.0976 0.2859 0.2710 0.0624 0.2831 3638
dan 0.1499 0.3021 0.2659 0.0807 0.2014 1301
danr 0.0806 0.3578 0.2466 0.0619 0.2531 2778
dati 0.0883 0.3451 0.2310 0.0803 0.2553 1892
dimm 0.1049 0.3353 0.2525 0.0585 0.2488 1897
disco-r 0.0684 0.4288 0.1861 0.0953 0.2214 1784
dl 0.0583 0.3748 0.2073 0.1454 0.2142 3020
dmrt11E 0.1225 0.3068 0.2688 0.0640 0.2379 8403
dmrt93B 0.1144 0.3137 0.2733 0.0466 0.2519 4160
dmrt99B 0.1443 0.1828 0.3265 0.0509 0.2955 11060
dpn 0.0804 0.4185 0.2011 0.0835 0.2165 10790
drm 0.0251 0.4939 0.0633 0.3253 0.0923 5936
dsf 0.0779 0.4046 0.1866 0.1136 0.2173 4095
dsx 0.1369 0.1956 0.2911 0.0983 0.2782 13873
dve 0.0538 0.4135 0.1336 0.2181 0.1810 7011
dysf 0.1076 0.2847 0.2682 0.0845 0.2551 7943
eg 0.1104 0.2214 0.2769 0.1030 0.2883 11723
emc 0.0548 0.4976 0.1684 0.0848 0.1943 1698
ems 0.0640 0.4296 0.1922 0.1072 0.2071 3564
en 0.0785 0.3437 0.2251 0.1047 0.2480 2790
erm 0.0293 0.6210 0.0534 0.2314 0.0649 3483
esg 0.1001 0.3370 0.2552 0.0448 0.2629 4397
eve 0.1357 0.1204 0.3242 0.0755 0.3442 9012
ewg 0.0833 0.3989 0.2066 0.1033 0.2079 5605
exex 0.0938 0.2420 0.2318 0.1159 0.3166 12158
ey 0.1067 0.3190 0.2447 0.0723 0.2573 6319
eyg 0.0660 0.4103 0.1821 0.1113 0.2304 2318
fd102C 0.1196 0.3057 0.2833 0.0836 0.2079 1698
fd19B 0.0259 0.5347 0.0645 0.2882 0.0866 4434
fd3F 0.0681 0.4086 0.2083 0.0638 0.2511 3918
fd59A 0.1346 0.2337 0.2984 0.0427 0.2905 4612
fd96Ca 0.1118 0.2216 0.2732 0.1129 0.2804 8370
fd96Cb 0.1136 0.2984 0.2803 0.0367 0.2709 5341
fkh 0.0794 0.2457 0.2136 0.1588 0.3025 10553
foxo 0.1150 0.2956 0.2554 0.0762 0.2578 9938
fru 0.1136 0.2629 0.2528 0.1134 0.2573 9658
ftz-f1 0.0548 0.3223 0.1612 0.2317 0.2301 8011
gce 0.0959 0.2905 0.2399 0.1262 0.2474 3755
gcm 0.1108 0.2535 0.2540 0.1135 0.2682 8601
gcm2 0.0648 0.3984 0.1815 0.1260 0.2293 3223
gem 0.1482 0.1921 0.3313 0.0410 0.2874 15132
gfzf 0.0349 0.5651 0.0743 0.2408 0.0850 8376
gl 0.1054 0.2287 0.2393 0.1311 0.2955 6896
grau 0.1041 0.2924 0.2557 0.0875 0.2603 12281
grh 0.1008 0.1694 0.2846 0.1462 0.2990 3194
grn 0.1170 0.2192 0.2503 0.1181 0.2954 7724
gsb 0.0796 0.3326 0.2200 0.1279 0.2398 2877
gsb-n 0.1326 0.2580 0.2811 0.0726 0.2557 6186
gt 0.1046 0.3549 0.2453 0.0685 0.2267 1826
ham 0.0901 0.3962 0.2097 0.0978 0.2062 1421
hb 0.0923 0.3975 0.1650 0.2367 0.1085 3696
hbn 0.0244 0.6193 0.0544 0.2341 0.0678 3733
her 0.0590 0.3708 0.1631 0.2129 0.1941 5946
hkb 0.0925 0.3106 0.2174 0.1386 0.2408 9479
hng1 0.0674 0.4056 0.1895 0.1300 0.2075 4270
hng2 0.0919 0.3081 0.2565 0.0919 0.2516 1610
hth 0.2324 0.0653 0.4111 0.0419 0.2492 3627
ind 0.0887 0.3947 0.2236 0.0585 0.2346 5354
insv 0.0891 0.2014 0.1773 0.3559 0.1764 22126
inv 0.0368 0.5959 0.0864 0.2163 0.0645 3393
jigr1 0.1060 0.3623 0.2439 0.0741 0.2137 2255
jim 0.0686 0.2880 0.1876 0.2387 0.2171 1764
jing 0.1270 0.2325 0.3086 0.0683 0.2636 5126
jumu 0.0719 0.4434 0.1819 0.1066 0.1962 3507
kay 0.0695 0.3414 0.1895 0.1299 0.2695 7750
ken 0.0781 0.4048 0.1882 0.1549 0.1740 7592
klu 0.0886 0.3922 0.2144 0.0863 0.2186 3093
kmg 0.0739 0.4413 0.2019 0.0638 0.2191 2273
kni 0.1201 0.1970 0.2637 0.1215 0.2977 10467
knrl 0.0637 0.5543 0.1141 0.1881 0.0799 4945
l(1)sc 0.0412 0.4370 0.1003 0.2933 0.1282 7760
l(3)neo38 0.1477 0.1554 0.3331 0.0760 0.2877 7219
lab 0.1293 0.1978 0.2894 0.0768 0.3067 11580
lbe 0.0740 0.4294 0.1748 0.1191 0.2027 3838
lilli 0.0716 0.4122 0.1843 0.1132 0.2187 6999
lmd 0.1068 0.3155 0.2631 0.0658 0.2488 6367
lms 0.0982 0.3501 0.2370 0.0679 0.2469 8575
lola 0.0998 0.3136 0.2343 0.1240 0.2283 25663
lov 0.1059 0.2549 0.2464 0.1701 0.2228 4798
luna 0.0511 0.5381 0.1319 0.1006 0.1784 1312
lz 0.1118 0.3205 0.2558 0.0614 0.2505 7612
maf-S 0.0640 0.4446 0.1796 0.1035 0.2084 3518
mid 0.0325 0.4770 0.0774 0.3076 0.1054 6316
mirr 0.0948 0.2546 0.2213 0.1331 0.2962 8966
mld 0.0514 0.4600 0.1103 0.2821 0.0962 2974
nau 0.0950 0.2382 0.2451 0.1212 0.3004 6871
nerfin-1 0.1118 0.2605 0.2339 0.1453 0.2484 11132
nerfin-2 0.0533 0.4911 0.1099 0.2493 0.0965 3358
net 0.1262 0.2071 0.2856 0.0790 0.3022 9852
nom 0.0878 0.2584 0.2088 0.1836 0.2615 8488
nub 0.0362 0.4641 0.0939 0.2916 0.1141 7177
oc 0.1422 0.1902 0.3111 0.0730 0.2836 9045
odd 0.0929 0.2856 0.2408 0.0976 0.2831 4814
onecut 0.0899 0.2934 0.2223 0.1267 0.2678 7208
org-1 0.0902 0.3151 0.2463 0.0631 0.2853 3516
otp 0.1025 0.2686 0.2494 0.1185 0.2611 5045
ouib 0.1189 0.2624 0.2789 0.0516 0.2882 5020
ovo 0.0434 0.4490 0.1172 0.1826 0.2078 2628
p53 0.0642 0.4561 0.1636 0.1315 0.1846 1901
pad 0.0554 0.3814 0.1704 0.1648 0.2280 8202
pan 0.1027 0.2804 0.2597 0.1060 0.2513 9162
pb 0.0676 0.3687 0.1925 0.1512 0.2199 2810
pdm2 0.0374 0.5068 0.0697 0.3022 0.0839 2194
pdm3 0.1430 0.2220 0.2989 0.0424 0.2938 8258
peb 0.0936 0.3580 0.2355 0.0690 0.2439 2841
pho 0.0558 0.4977 0.1583 0.0978 0.1904 3456
phol 0.1039 0.3282 0.2415 0.1101 0.2164 13882
pita 0.1289 0.3893 0.2316 0.1544 0.0958 2358
pnt 0.0908 0.3817 0.2285 0.0664 0.2325 3479
prd 0.1305 0.2706 0.2773 0.0935 0.2281 9424
prg 0.0503 0.4995 0.1583 0.1123 0.1797 2805
pros 0.1457 0.1539 0.3176 0.0890 0.2938 12794
psq 0.0932 0.2644 0.2293 0.1472 0.2658 25627
pzg 0.0296 0.5817 0.0635 0.2485 0.0767 8680
ranshi 0.0926 0.3398 0.2403 0.0873 0.2400 5359
repo 0.0675 0.4007 0.1863 0.1292 0.2162 2770
rgr 0.1023 0.3111 0.2289 0.1056 0.2520 7820
rib 0.0608 0.3111 0.1843 0.2043 0.2395 4606
rn 0.1068 0.2856 0.2652 0.0647 0.2777 3774
ro 0.1020 0.3648 0.2411 0.0627 0.2294 1883
row 0.1049 0.3404 0.2484 0.0708 0.2355 13285
run 0.1162 0.2749 0.2519 0.0821 0.2749 3751
sage 0.0866 0.3536 0.2156 0.0792 0.2650 2449
salm 0.0906 0.3025 0.2269 0.1036 0.2765 5465
salr 0.1432 0.1923 0.3144 0.0513 0.2988 15530
sc 0.0928 0.3140 0.2571 0.0699 0.2662 3178
schlank 0.0707 0.3773 0.2074 0.0871 0.2575 2136
scro 0.0350 0.5462 0.0798 0.2453 0.0937 4024
scrt 0.1199 0.2308 0.2707 0.1085 0.2701 8909
sd 0.1140 0.1881 0.2661 0.1031 0.3288 16617
sens 0.0871 0.3744 0.2215 0.0805 0.2365 2858
sens-2 0.0986 0.3103 0.2569 0.0922 0.2420 3145
seq 0.0931 0.2936 0.2497 0.1110 0.2526 5286
shn 0.0657 0.4268 0.1919 0.1104 0.2051 3423
sim 0.1007 0.3057 0.2562 0.0921 0.2453 2682
sima 0.0736 0.4123 0.2013 0.0905 0.2223 1237
sisA 0.1106 0.3060 0.2713 0.0687 0.2434 5559
slbo 0.0952 0.3437 0.2305 0.0994 0.2312 8716
slou 0.0761 0.4823 0.1833 0.0665 0.1918 2826
slp1 0.0217 0.6405 0.0501 0.2246 0.0632 3371
slp2 0.0745 0.4212 0.2020 0.0778 0.2245 2659
sna 0.0348 0.5134 0.0855 0.2720 0.0943 4221
so 0.0890 0.2865 0.2405 0.1301 0.2539 5372
sob 0.0766 0.3687 0.2018 0.1348 0.2181 7001
sqz 0.1118 0.1865 0.2836 0.1101 0.3081 8714
sr 0.0892 0.2186 0.2496 0.1566 0.2860 5032
ss 0.1368 0.1694 0.2977 0.1046 0.2914 23003
ssp 0.0925 0.3995 0.2309 0.0813 0.1958 4919
stc 0.0966 0.2966 0.2341 0.1048 0.2679 5084
stwl 0.0862 0.5095 0.1580 0.1350 0.1113 8170
su(Hw) 0.1093 0.3119 0.2425 0.1233 0.2130 8346
sug 0.0725 0.3188 0.1945 0.1502 0.2640 12988
sv 0.0649 0.4725 0.1823 0.0783 0.2020 3742
svp 0.1310 0.1965 0.2751 0.1053 0.2921 9680
tHMG1 0.0493 0.4478 0.1618 0.1114 0.2297 3609
tai 0.1061 0.2951 0.2457 0.0750 0.2780 2572
tap 0.0979 0.3120 0.2517 0.0665 0.2719 4045
term 0.0111 0.6444 0.0889 0.2333 0.0222 90
tgo 0.0987 0.3299 0.2546 0.0608 0.2560 5793
tin 0.0859 0.4140 0.2172 0.0709 0.2120 5179
tio 0.1166 0.2549 0.2974 0.0346 0.2965 4597
tj 0.0820 0.2245 0.1978 0.1727 0.3229 13837
tll 0.1255 0.2658 0.2609 0.1308 0.2170 9990
toe 0.0590 0.4783 0.1664 0.1159 0.1804 3642
topi 0.1184 0.2801 0.2646 0.0762 0.2609 8127
toy 0.0828 0.3930 0.2066 0.0834 0.2342 1883
trem 0.0609 0.5500 0.1391 0.1222 0.1278 6536
trh 0.0690 0.4666 0.1934 0.0639 0.2071 1753
ttk 0.1070 0.3074 0.2631 0.0731 0.2494 4691
tup 0.0706 0.4520 0.1901 0.0749 0.2124 1615
twi 0.1245 0.2586 0.2714 0.0904 0.2551 9659
tx 0.0666 0.4641 0.1815 0.0931 0.1948 3019
unc-4 0.0232 0.6023 0.0585 0.2424 0.0736 4921
unpg 0.1060 0.2669 0.2674 0.0871 0.2727 9843
ush 0.0517 0.3909 0.1229 0.2783 0.1561 6029
usp 0.0954 0.1966 0.2296 0.1714 0.3069 20462
vnd 0.0671 0.5135 0.1214 0.1946 0.1035 3788
vri 0.1025 0.2143 0.2417 0.1297 0.3119 12909
vvl 0.1067 0.2789 0.2485 0.1107 0.2552 11691
wdn 0.0776 0.3962 0.2017 0.1001 0.2244 3248
wek 0.0690 0.3437 0.1845 0.1714 0.2314 3582
woc 0.1063 0.3111 0.2498 0.0808 0.2520 9087
wor 0.0957 0.3306 0.2672 0.0503 0.2561 3061
z 0.1011 0.2389 0.2719 0.1551 0.2330 4450
zen 0.1271 0.3003 0.2650 0.1022 0.2055 10805
zen2 0.0433 0.5527 0.1149 0.2064 0.0826 3280
zf30C 0.1345 0.1922 0.3016 0.1111 0.2605 6445
zfh1 0.1157 0.2813 0.2498 0.1279 0.2253 7458
zfh2 0.0483 0.5226 0.1487 0.0952 0.1852 4330
zld 0.0539 0.5006 0.1527 0.1233 0.1694 3300
Total 0.0941 0.3212 0.2251 0.1245 0.2351 3630715

## Sheet: s3.Fly_peaks_non-HOT
TF	3P	5P<=500	5P>500	Exon	Intron	Total
ATbp	227	164	551	62	583	1587
Abd-B	292	607	613	130	505	2147
Adf1	171	859	500	461	474	2465
Aef1	172	352	380	160	387	1451
Antp	147	281	258	109	222	1017
Asciz	232	163	451	75	547	1468
Atf-2	71	96	140	23	103	433
Atf3	42	65	97	24	73	301
Atf6	232	437	555	316	705	2245
Awh	477	241	916	225	873	2732
B-H1	103	95	204	17	217	636
B-H2	88	474	211	178	273	1224
Bdp1	114	128	236	72	147	697
Blimp-1	1790	1350	4007	829	3958	11934
BtbVII	92	183	185	85	260	805
BuGZ	20	74	37	35	57	223
C15	76	48	146	64	120	454
CG10147	127	322	262	142	262	1115
CG10209	222	231	489	40	436	1418
CG1024	199	346	392	148	295	1380
CG10274	29	86	126	34	120	395
CG10321	160	270	408	154	354	1346
CG10348	111	44	197	36	159	547
CG10366	239	301	539	78	459	1616
CG10431	151	301	327	189	354	1322
CG10462	46	127	81	19	57	330
CG10543	201	540	494	350	711	2296
CG10631	1576	789	3088	206	2396	8055
CG10654	98	216	184	23	179	700
CG10669	815	401	1578	149	1308	4251
CG10949	100	1419	209	631	193	2552
CG10959	253	93	470	120	247	1183
CG10979	993	1209	2048	776	1754	6780
CG11085	111	136	216	90	126	679
CG11093	190	100	349	139	260	1038
CG11247	207	234	410	205	325	1381
CG11294	280	188	620	70	580	1738
CG11398	62	90	99	84	136	471
CG11456	559	404	1105	702	618	3388
CG11504	1606	1221	3285	455	2377	8944
CG11560	209	288	338	195	171	1201
CG11617	294	1412	717	940	1160	4523
CG11695	304	404	680	198	771	2357
CG11696	181	137	377	104	405	1204
CG11723	46	241	154	75	140	656
CG11902	323	177	706	32	545	1783
CG11906	355	2044	653	1602	694	5348
CG11966	56	905	91	518	119	1689
CG12071	392	438	882	272	926	2910
CG12104	26	71	49	11	67	224
CG12155	128	606	281	156	315	1486
CG12219	155	157	352	59	348	1071
CG12236	51	54	114	27	110	356
CG12299	37	93	69	63	91	353
CG1233	193	233	452	91	455	1424
CG12391	859	1651	1744	384	1470	6108
CG12605	474	702	1041	416	1040	3673
CG12744	71	199	138	56	111	575
CG12768	90	264	213	163	313	1043
CG12769	1285	1429	3088	1012	3395	10209
CG12942	74	209	134	25	149	591
CG13123	111	341	264	84	253	1053
CG13204	1419	799	2779	730	2334	8061
CG13287	197	2193	359	1026	309	4084
CG13296	446	852	1059	461	1177	3995
CG13775	186	389	363	138	297	1373
CG13894	1114	960	2071	528	1934	6607
CG13897	116	94	267	98	216	791
CG14014	248	431	542	212	576	2009
CG14050	99	121	210	26	198	654
CG14441	290	355	691	205	667	2208
CG14655	1272	538	2527	175	1996	6508
CG14667	179	127	327	54	239	926
CG14710	973	2526	1843	897	1477	7716
CG14711	62	497	191	170	266	1186
CG14860	241	951	390	480	266	2328
CG14965	39	23	67	23	38	190
CG15011	307	229	686	91	672	1985
CG15073	19	48	56	28	35	186
CG15269	748	698	1726	329	1636	5137
CG1529	173	110	330	48	336	997
CG15336	1001	872	2192	523	2095	6683
CG15436	63	1157	134	390	96	1840
CG15514	194	1501	413	494	439	3041
CG15601	394	792	807	297	684	2974
CG15696	329	326	616	61	427	1759
CG15710	1131	983	2392	452	2022	6980
CG15812	105	467	255	181	246	1254
CG1602	138	204	281	22	219	864
CG1603	769	1652	1677	552	1319	5969
CG1620	45	417	71	114	85	732
CG1647	61	125	101	51	92	430
CG1663	1590	788	3121	311	2310	8120
CG16779	952	909	2114	826	1828	6629
CG16813	372	1352	597	728	333	3382
CG16815	133	102	232	5	146	618
CG16863	110	144	218	58	190	720
CG17186	17	661	33	212	37	960
CG17328	405	360	850	229	603	2447
CG17359	713	829	1607	395	1496	5040
CG17361	612	917	1292	198	984	4003
CG17385	189	461	534	350	589	2123
CG17568	305	406	769	274	850	2604
CG17612	94	36	122	74	109	435
CG17801	179	666	380	480	567	2272
CG17802	73	357	228	98	143	899
CG17806	1152	760	2282	307	1947	6448
CG17829	696	1765	1342	643	1087	5533
CG1792	51	116	113	57	122	459
CG18011	96	216	123	99	90	624
CG18262	1161	1315	2380	470	1917	7243
CG18476	71	92	126	28	122	439
CG18599	1241	793	2390	358	2076	6858
CG18764	97	230	185	45	163	720
CG2116	82	1687	167	436	154	2526
CG2120	570	1366	1192	361	1218	4707
CG2129	35	633	50	287	34	1039
CG2199	741	675	1615	697	1475	5203
CG2202	245	277	540	163	451	1676
CG2678	971	891	2094	363	1930	6249
CG2712	924	1524	1786	397	1370	6001
CG2889	153	68	293	154	179	847
CG30020	436	1672	739	888	759	4494
CG3032	834	961	1789	334	1445	5363
CG30403	469	933	960	146	868	3376
CG30431	152	79	325	16	214	786
CG3065	66	91	149	54	87	447
CG31224	163	165	329	80	314	1051
CG31365	98	183	198	97	169	745
CG31388	11	21	28	3	8	71
CG31441	603	589	1178	122	899	3391
CG31627	597	621	1198	106	998	3520
CG3163	136	601	366	351	289	1743
CG32006	1451	640	2954	166	2412	7623
CG32121	593	725	1374	462	1468	4622
CG32532	440	947	848	479	833	3547
CG32767	169	300	377	203	430	1479
CG32772	313	246	615	168	507	1849
CG3281	228	496	567	229	737	2257
CG33017	73	327	213	134	336	1083
CG33213	171	826	281	208	195	1681
CG33557	232	362	522	199	444	1759
CG3407	169	98	328	29	316	940
CG34224	128	1421	240	711	244	2744
CG34367	552	295	1051	130	904	2932
CG34376	352	1237	761	797	1215	4362
CG3726	206	58	340	259	203	1066
CG3838	18	52	47	38	40	195
CG3847	224	986	484	366	368	2428
CG3919	951	603	1808	325	1421	5108
CG3995	60	833	124	321	153	1491
CG42726	199	796	358	695	185	2233
CG42741	254	2432	530	1591	631	5438
CG4282	26	118	44	79	42	309
CG4318	938	395	1974	80	1557	4944
CG4328	58	97	94	30	140	419
CG43347	169	435	357	47	363	1371
CG4360	394	382	905	748	833	3262
CG43689	51	26	112	55	105	349
CG44002	697	457	1424	117	1148	3843
CG4404	257	111	506	119	257	1250
CG4424	251	342	504	74	412	1583
CG4496	1218	1167	2563	952	2246	8146
CG4617	5	673	15	1187	151	2031
CG4707	119	154	372	70	337	1052
CG4730	149	100	310	56	255	870
CG4820	151	154	300	31	217	853
CG4854	65	277	166	138	222	868
CG4936	222	1994	448	1304	434	4402
CG5180	291	513	707	357	560	2428
CG5245	119	129	228	34	182	692
CG5953	113	87	270	206	222	898
CG6163	1250	970	2588	734	2326	7868
CG6254	123	122	222	56	184	707
CG6272	146	257	224	142	154	923
CG6276	748	528	1647	247	1624	4794
CG6654	72	67	151	27	127	444
CG6683	57	225	151	130	180	743
CG6689	465	429	956	144	772	2766
CG6765	26	64	71	41	112	314
CG6791	426	1383	737	871	468	3885
CG6808	729	513	1485	275	1324	4326
CG6813	232	150	453	40	491	1366
CG7101	180	953	414	336	612	2495
CG7271	79	93	133	58	82	445
CG7357	258	370	495	169	388	1680
CG7368	441	324	951	105	789	2610
CG7372	335	254	640	113	566	1908
CG7691	67	1045	136	426	133	1807
CG7745	237	202	463	156	431	1489
CG7786	79	266	182	64	189	780
CG7963	175	887	290	455	190	1997
CG7987	282	740	619	594	787	3022
CG8089	88	150	186	92	177	693
CG8119	1108	765	2331	418	2069	6691
CG8159	1626	953	3171	340	2413	8503
CG8281	265	159	552	88	556	1620
CG8301	1137	662	2414	265	2189	6667
CG8319	307	171	578	56	495	1607
CG8388	439	390	907	120	733	2589
CG8478	374	1315	864	927	592	4072
CG8765	133	120	243	85	106	687
CG8924	903	1412	1922	805	1818	6860
CG8944	84	133	151	54	125	547
CG9215	173	253	360	142	266	1194
CG9609	85	222	165	59	134	665
CG9727	427	454	859	131	730	2601
CG9876	39	101	61	39	49	289
CG9932	394	1054	849	443	705	3445
CG9948	1123	542	2207	147	1706	5725
CHES-1-like	28	376	80	215	101	800
CTCF	1482	2420	2470	1282	1128	8782
CTPsyn	574	753	1203	707	1178	4415
Camta	72	132	153	49	140	546
Cf2	73	710	152	568	187	1690
CkIIα-i1	19	11	27	17	27	101
Clamp	734	440	1594	1704	809	5281
Clk	23	56	53	16	69	217
CoRest	558	1437	1244	230	948	4417
Coop	710	706	1423	696	1174	4709
CrebA	432	851	975	365	1102	3725
CrebB	50	150	121	89	156	566
Crg-1	42	154	83	68	128	475
D	369	227	757	141	530	2024
D1	590	536	1246	293	905	3570
D19A	1108	969	2301	448	2035	6861
D19B	152	211	332	37	313	1045
Dbx	291	702	542	604	507	2646
Deaf1	1139	2376	2581	1490	2197	9783
Dfd	468	283	758	455	414	2378
Dif	119	542	287	188	253	1389
Dip2	71	39	100	19	28	257
Dlip3	52	233	120	36	130	571
Dll	368	1790	677	1246	574	4655
Doc2	47	9	85	49	54	244
Doc3	97	992	209	540	160	1998
Dp	388	3624	668	1659	673	7012
Dref	282	1790	529	598	214	3413
Drgx	676	641	1545	345	1457	4664
E(bx)	657	3657	1318	1511	888	8031
E(spl)m3-HLH	205	289	390	29	334	1247
E(spl)m5-HLH	101	107	206	54	176	644
E(spl)m7-HLH	65	56	142	39	123	425
E(spl)m8-HLH	733	555	1360	233	1088	3969
E(spl)mbeta-HLH	1501	2460	3260	1358	3221	11800
E(spl)mdelta-HLH	152	302	317	248	281	1300
E(spl)mgamma-HLH	131	237	286	21	243	918
E(var)3-9	47	136	94	8	98	383
E2f1	249	321	487	145	445	1647
E2f2	313	2321	594	749	518	4495
ERR	85	332	190	281	263	1151
EcR	1910	1656	4190	1741	4762	14259
Eip74EF	394	662	913	366	1115	3450
Eip75B	873	655	1737	310	1586	5161
Eip78C	877	486	1717	157	1426	4663
Eip93F	103	142	212	53	198	708
Ets21C	332	242	672	33	533	1812
Ets65A	46	192	103	49	74	464
Ets96B	1099	727	2247	275	1756	6104
Ets97D	111	1375	191	369	103	2149
Ets98B	638	841	1383	478	1421	4761
Fer1	372	1064	781	683	978	3878
Fer2	49	126	107	19	110	411
Fer3	243	401	550	119	555	1868
FoxK	43	858	113	474	138	1626
FoxL1	151	106	321	111	370	1059
FoxP	579	522	1216	338	1191	3846
GATAd	29	63	63	17	57	229
GATAe	117	343	285	157	462	1364
Gsc	90	14	147	34	73	358
Gug	661	586	1322	189	1119	3877
H15	272	145	493	158	358	1426
H2.0	220	234	427	94	350	1325
HGTX	224	1391	464	1140	506	3725
HHEX	138	160	306	75	351	1030
HLH3B	335	329	745	166	643	2218
HLH4C	285	1260	467	772	360	3144
HLH54F	61	340	145	51	146	743
Hand	87	132	175	57	177	628
Hey	358	218	676	121	552	1925
HmgD	63	437	129	243	79	951
HmgZ	183	1421	428	576	482	3090
Hmx	24	83	66	25	72	270
Hnf4	410	739	809	356	857	3171
Hr3	161	405	356	45	318	1285
Hr38	14	3	30	5	19	71
Hr39	927	535	1798	337	1347	4944
Hr4	890	525	1815	110	1584	4924
Hr51	1126	921	2233	337	1849	6466
Hr78	918	1074	2036	615	2390	7033
Hr83	108	370	237	217	284	1216
Hr96	109	353	242	163	255	1122
Hsf	221	530	432	86	381	1650
Jra	132	357	279	161	326	1255
Kah	100	304	228	239	308	1179
Klf15	99	412	220	159	263	1153
Kr	141	62	281	28	189	701
Kr-h1	301	1918	635	1369	715	4938
Lim3	36	20	94	26	50	226
M1BP	26	1397	52	786	112	2373
MBD-R2	124	1314	271	1716	350	3775
MESR4	140	1228	266	3413	805	5852
MTF-1	75	101	163	65	179	583
Mabi	863	880	1720	937	1712	6112
Mad	45	244	83	88	94	554
Max	60	426	81	217	135	919
Med	274	674	588	276	496	2308
Mef2	567	1963	1146	1588	1376	6640
Meics	372	524	842	156	818	2712
Mes2	108	560	284	308	256	1516
Met	1009	650	1954	207	1645	5465
Mnt	104	934	235	750	515	2538
Mondo	12	24	39	14	36	125
Mrtf	278	117	481	183	290	1349
Myb	147	1460	203	410	132	2352
Myc	321	1234	593	673	374	3195
NC2alpha	26	49	58	37	43	213
NC2beta	122	484	275	279	253	1413
NFAT	182	456	372	355	293	1658
NK7.1	18	36	38	12	33	137
Neu2	60	80	104	97	81	422
Nf-YA	114	191	297	135	223	960
Nf-YB	834	1004	1846	485	1246	5415
NfI	222	503	538	151	497	1911
Oaz	91	71	210	58	172	602
OdsH	1312	929	2612	281	2240	7374
Oli	665	448	1457	94	1140	3804
Opbp	269	1406	509	899	298	3381
Optix	192	100	366	118	260	1036
PHDP	648	1074	1418	451	1442	5033
Pdp1	1051	1733	2218	1206	2808	9016
Plzf	667	418	1290	110	1032	3517
Poxn	22	19	56	18	45	160
Ptx1	564	574	1192	132	993	3455
REPTOR	155	688	317	341	355	1856
REPTOR-BP	89	155	197	26	217	684
Rel	1008	1898	2095	1391	2593	8985
Rfx	511	1298	1160	650	1111	4730
RunxB	77	1090	162	411	161	1901
Rx	150	100	307	71	214	842
SREBP	722	885	1413	231	1123	4374
Scr	190	1675	324	813	266	3268
Sidpn	185	1451	377	702	390	3105
Six4	102	158	244	24	165	693
Smox	1328	820	2547	261	1911	6867
Snoo	581	694	1202	372	1092	3941
Sox100B	413	422	871	123	865	2694
Sox102F	2157	1317	4368	542	3721	12105
Sox14	676	884	1354	441	1328	4683
Sox15	280	181	598	20	467	1546
SoxN	168	1114	416	548	396	2642
Sp1	887	1066	1841	704	1610	6108
Spps	143	141	262	55	198	799
Sry-beta	95	505	243	188	185	1216
Sry-delta	256	2306	495	1043	501	4601
Stat92E	295	765	592	629	566	2847
Su(H)	2119	1719	4296	5919	3911	17964
TFAM	20	12	53	6	51	142
TfAP-2	87	1418	152	680	148	2485
Trl	1799	3911	4338	2828	4179	17055
Usf	33	59	66	8	30	196
Vsx1	315	366	689	215	847	2432
Vsx2	202	380	457	147	296	1482
Xbp1	298	643	626	123	511	2201
Xrp1	789	736	1528	241	1283	4577
ZIPIC	22	236	22	68	19	367
Zif	646	2281	1235	634	916	5712
ab	19	42	45	10	35	151
abd-A	2346	850	4180	454	3358	11188
ac	238	191	463	131	384	1407
achi	953	692	1831	230	1470	5176
acj6	858	495	1727	87	1390	4557
al	122	258	244	70	247	941
amos	282	1734	471	796	228	3511
aop	47	76	105	53	62	343
ap	131	84	277	41	231	764
apt	112	1150	212	583	199	2256
ara	428	212	793	283	574	2290
ase	208	164	435	161	321	1289
ato	104	937	197	458	151	1847
az2	232	269	486	35	379	1401
bab1	374	1655	706	1363	1011	5109
bab2	133	167	231	25	238	794
bap	96	1346	189	791	189	2611
bbx	189	1464	386	927	310	3276
bcd	173	303	362	38	320	1196
bigmax	40	215	80	204	193	732
bin	84	865	180	547	158	1834
bowl	47	75	113	85	96	416
br	595	636	1253	491	1186	4161
brk	526	757	1001	296	1097	3677
bs	80	889	212	367	215	1763
bsh	1409	1251	3012	649	2697	9018
btn	33	20	49	14	42	158
cad	303	230	666	143	455	1797
cas	42	82	76	65	49	314
cato	26	65	59	3	50	203
caup	224	366	449	171	545	1755
cbt	232	239	521	214	539	1745
cg	1606	1449	3540	1476	3789	11860
chinmo	972	2171	2358	1507	2784	9792
chn	94	222	236	90	164	806
ci	756	1032	1672	1019	1487	5966
cic	484	1560	1141	1187	1911	6283
cnc	439	853	956	791	1312	4351
crc	8	36	46	8	60	158
croc	174	113	335	22	226	870
crol	1049	683	2452	573	2280	7037
crp	69	1839	133	912	303	3256
cwo	613	862	1428	459	1755	5117
cyc	586	541	1121	105	909	3262
da	36	76	53	30	53	248
dac	232	154	515	46	426	1373
dan	112	14	143	61	66	396
danr	72	65	165	25	130	457
dati	46	24	97	47	81	295
dimm	67	18	109	31	98	323
disco-r	11	32	31	19	39	132
dl	110	601	358	176	338	1583
dmrt11E	781	821	1510	214	1093	4419
dmrt93B	293	185	611	32	443	1564
dmrt99B	1296	662	2657	244	2133	6992
dpn	428	1061	853	240	794	3376
drm	108	1448	219	1121	259	3155
dsf	204	452	378	156	419	1609
dsx	1611	1145	3121	714	2703	9294
dve	304	1525	656	891	850	4226
dysf	602	583	1344	341	1083	3953
eg	1052	994	2383	655	2234	7318
emc	13	37	21	13	15	99
ems	63	204	151	95	137	650
en	59	82	155	48	144	488
erm	78	1099	118	452	107	1854
esg	230	199	485	23	423	1360
eve	987	471	2139	456	2230	6283
ewg	260	778	542	279	438	2297
exex	894	1508	2015	817	2741	7975
ey	464	386	903	120	815	2688
eyg	34	83	77	48	77	319
fd102C	109	53	233	35	119	549
fd19B	86	1164	168	686	190	2294
fd3F	93	219	283	36	304	935
fd59A	462	178	827	46	670	2183
fd96Ca	738	597	1590	475	1447	4847
fd96Cb	374	239	771	17	628	2029
fkh	621	1091	1479	878	2047	6116
foxo	834	742	1590	211	1399	4776
fru	829	771	1609	514	1423	5146
ftz-f1	293	1114	783	1059	1091	4340
gce	174	172	331	178	288	1143
gcm	688	722	1377	435	1294	4516
gcm2	43	131	104	100	141	519
gem	1942	1230	4012	312	3126	10622
gfzf	191	2684	324	1219	333	4751
gl	540	505	1104	408	1188	3745
grau	973	1404	2146	510	1949	6982
grh	255	308	621	243	607	2034
grn	728	783	1374	497	1592	4974
gsb	86	90	207	157	181	721
gsb-n	596	369	1071	160	820	3016
gt	81	19	101	31	60	292
ham	57	22	99	54	58	290
hb	315	715	540	612	326	2508
hbn	68	1179	110	476	112	1945
her	151	705	361	608	427	2252
hkb	620	969	1246	639	1246	4720
hng1	122	391	237	214	240	1204
hng2	66	58	137	61	127	449
hth	772	125	1275	101	724	2997
ind	255	421	494	56	443	1669
insv	1728	2069	3000	6024	2500	15321
inv	98	964	215	413	115	1805
jigr1	115	79	190	74	101	559
jim	62	129	159	152	164	666
jing	421	246	910	181	631	2389
jumu	86	245	155	98	131	715
kay	310	734	661	456	981	3142
ken	354	950	734	626	555	3219
klu	109	116	176	72	149	622
kmg	81	216	164	49	150	660
kni	999	793	1932	607	2058	6389
knrl	259	1387	413	577	223	2859
l(1)sc	262	1796	520	1352	542	4472
l(3)neo38	889	482	1814	259	1379	4823
lab	1192	923	2441	473	2439	7468
lbe	160	406	331	158	305	1360
lilli	257	863	566	298	611	2595
lmd	452	422	917	166	720	2677
lms	569	1001	1214	229	1123	4136
lola	1996	3743	4188	1645	3494	15066
lov	317	224	619	414	433	2007
luna	7	46	22	10	15	100
lz	623	625	1224	135	1035	3642
maf-S	62	235	143	81	136	657
mid	153	1523	299	1124	338	3437
mirr	653	995	1387	570	1835	5440
mld	127	660	264	496	186	1733
nau	394	501	893	358	1045	3191
nerfin-1	955	1129	1747	790	1586	6207
nerfin-2	146	839	279	481	217	1962
net	978	672	1972	305	1848	5775
nom	535	819	1162	738	1284	4538
nub	196	1732	417	1209	432	3986
oc	1026	571	2034	317	1652	5600
odd	218	262	475	135	525	1615
onecut	416	678	906	442	1054	3496
org-1	110	93	251	13	254	721
otp	290	251	604	202	567	1914
ouib	410	224	804	46	673	2157
ovo	56	272	132	161	224	845
p53	29	123	59	63	58	332
pad	303	1171	794	587	958	3813
pan	643	709	1407	463	1207	4429
pb	50	108	112	114	118	502
pdm2	58	498	102	379	93	1130
pdm3	927	498	1711	112	1466	4714
peb	81	65	165	26	126	463
pho	52	310	121	66	135	684
phol	1169	2230	2421	897	1851	8568
pita	253	547	451	245	181	1677
pnt	135	141	242	31	195	744
prd	964	760	1779	496	1171	5170
prg	23	182	61	63	52	381
pros	1610	957	3171	539	2702	8979
psq	1756	2369	3819	1630	4018	13592
pzg	155	2776	270	1320	274	4795
ranshi	262	352	578	157	483	1832
repo	41	117	90	93	91	432
rgr	572	697	1080	314	1063	3726
rib	148	353	403	396	477	1777
rn	251	155	526	89	445	1466
ro	56	19	85	35	57	252
row	1117	2255	2419	525	2053	8369
run	260	130	383	65	403	1241
sage	116	192	254	63	237	862
salm	266	375	585	183	713	2122
salr	1792	798	3432	273	2857	9152
sc	121	78	278	50	220	747
schlank	50	61	129	22	147	409
scro	112	1109	191	536	203	2151
scrt	835	836	1664	510	1451	5296
sd	1572	1624	3368	943	4073	11580
sens	85	78	161	29	126	479
sens-2	136	125	295	90	246	892
seq	285	411	670	236	584	2186
shn	59	209	150	74	134	626
sim	109	93	224	77	163	666
sima	12	13	20	6	18	69
sisA	408	292	837	177	589	2303
slbo	592	1034	1260	489	1065	4440
slou	69	151	109	22	78	429
slp1	56	1078	101	423	100	1758
slp2	51	72	90	13	74	300
sna	110	1122	219	665	195	2311
so	253	389	609	305	578	2134
sob	308	814	716	467	672	2977
sqz	719	590	1699	435	1687	5130
sr	302	326	763	390	859	2640
ss	2629	1513	5239	1132	4472	14985
ssp	269	546	536	171	335	1857
stc	257	266	511	196	530	1760
stwl	576	2320	930	642	547	5015
su(Hw)	719	924	1418	512	959	4532
sug	686	1981	1614	1060	2238	7579
sv	59	252	121	44	111	587
svp	1028	798	1890	634	1892	6242
tHMG1	82	272	236	100	328	1018
tai	165	208	331	91	377	1172
tap	192	188	414	50	362	1206
term	0	23	4	9	1	37
tgo	320	355	714	54	581	2024
tin	219	426	444	67	342	1498
tio	316	207	681	37	604	1845
tj	933	1307	2021	1272	3125	8658
tll	1062	1072	2086	672	1492	6384
toe	128	461	293	148	264	1294
topi	718	634	1411	215	1189	4167
toy	54	36	85	45	77	297
trem	214	1707	389	392	240	2942
trh	14	17	34	3	26	94
ttk	285	208	577	106	445	1621
tup	21	15	29	2	30	97
twi	943	821	1852	425	1555	5596
tx	37	162	82	49	80	410
unc-4	80	1546	161	679	174	2640
unpg	772	901	1763	369	1594	5399
ush	253	1168	490	1013	588	3512
usp	1613	2116	3565	2067	4505	13866
vnd	216	986	360	464	272	2298
vri	1040	1278	2254	880	2740	8192
vvl	963	1358	2024	710	1908	6963
wdn	98	141	188	80	173	680
wek	116	359	264	239	357	1335
woc	730	957	1501	242	1314	4744
wor	109	58	250	13	177	607
z	323	517	769	397	607	2613
zen	1140	1394	2124	633	1381	6672
zen2	118	1005	277	442	156	1998
zf30C	669	464	1326	327	989	3775
zfh1	610	529	1081	491	818	3529
zfh2	84	555	185	109	219	1152
zld	42	265	83	101	76	567
Total	235282	382469	484441	217484	442369	1762045

## Sheet: s4.Fly_peaks_non-HOT_fraction
TF 3P 5P<=500 5P>500 Exon Intron Total
ATbp 0.1430 0.1033 0.3472 0.0391 0.3674 1587
Abd-B 0.1360 0.2827 0.2855 0.0605 0.2352 2147
Adf1 0.0694 0.3485 0.2028 0.1870 0.1923 2465
Aef1 0.1185 0.2426 0.2619 0.1103 0.2667 1451
Antp 0.1445 0.2763 0.2537 0.1072 0.2183 1017
Asciz 0.1580 0.1110 0.3072 0.0511 0.3726 1468
Atf-2 0.1640 0.2217 0.3233 0.0531 0.2379 433
Atf3 0.1395 0.2159 0.3223 0.0797 0.2425 301
Atf6 0.1033 0.1947 0.2472 0.1408 0.3140 2245
Awh 0.1746 0.0882 0.3353 0.0824 0.3195 2732
B-H1 0.1619 0.1494 0.3208 0.0267 0.3412 636
B-H2 0.0719 0.3873 0.1724 0.1454 0.2230 1224
Bdp1 0.1636 0.1836 0.3386 0.1033 0.2109 697
Blimp-1 0.1500 0.1131 0.3358 0.0695 0.3317 11934
BtbVII 0.1143 0.2273 0.2298 0.1056 0.3230 805
BuGZ 0.0897 0.3318 0.1659 0.1570 0.2556 223
C15 0.1674 0.1057 0.3216 0.1410 0.2643 454
CG10147 0.1139 0.2888 0.2350 0.1274 0.2350 1115
CG10209 0.1566 0.1629 0.3449 0.0282 0.3075 1418
CG1024 0.1442 0.2507 0.2841 0.1072 0.2138 1380
CG10274 0.0734 0.2177 0.3190 0.0861 0.3038 395
CG10321 0.1189 0.2006 0.3031 0.1144 0.2630 1346
CG10348 0.2029 0.0804 0.3601 0.0658 0.2907 547
CG10366 0.1479 0.1863 0.3335 0.0483 0.2840 1616
CG10431 0.1142 0.2277 0.2474 0.1430 0.2678 1322
CG10462 0.1394 0.3848 0.2455 0.0576 0.1727 330
CG10543 0.0875 0.2352 0.2152 0.1524 0.3097 2296
CG10631 0.1957 0.0980 0.3834 0.0256 0.2975 8055
CG10654 0.1400 0.3086 0.2629 0.0329 0.2557 700
CG10669 0.1917 0.0943 0.3712 0.0351 0.3077 4251
CG10949 0.0392 0.5560 0.0819 0.2473 0.0756 2552
CG10959 0.2139 0.0786 0.3973 0.1014 0.2088 1183
CG10979 0.1465 0.1783 0.3021 0.1145 0.2587 6780
CG11085 0.1635 0.2003 0.3181 0.1325 0.1856 679
CG11093 0.1830 0.0963 0.3362 0.1339 0.2505 1038
CG11247 0.1499 0.1694 0.2969 0.1484 0.2353 1381
CG11294 0.1611 0.1082 0.3567 0.0403 0.3337 1738
CG11398 0.1316 0.1911 0.2102 0.1783 0.2887 471
CG11456 0.1650 0.1192 0.3262 0.2072 0.1824 3388
CG11504 0.1796 0.1365 0.3673 0.0509 0.2658 8944
CG11560 0.1740 0.2398 0.2814 0.1624 0.1424 1201
CG11617 0.0650 0.3122 0.1585 0.2078 0.2565 4523
CG11695 0.1290 0.1714 0.2885 0.0840 0.3271 2357
CG11696 0.1503 0.1138 0.3131 0.0864 0.3364 1204
CG11723 0.0701 0.3674 0.2348 0.1143 0.2134 656
CG11902 0.1812 0.0993 0.3960 0.0179 0.3057 1783
CG11906 0.0664 0.3822 0.1221 0.2996 0.1298 5348
CG11966 0.0332 0.5358 0.0539 0.3067 0.0705 1689
CG12071 0.1347 0.1505 0.3031 0.0935 0.3182 2910
CG12104 0.1161 0.3170 0.2188 0.0491 0.2991 224
CG12155 0.0861 0.4078 0.1891 0.1050 0.2120 1486
CG12219 0.1447 0.1466 0.3287 0.0551 0.3249 1071
CG12236 0.1433 0.1517 0.3202 0.0758 0.3090 356
CG12299 0.1048 0.2635 0.1955 0.1785 0.2578 353
CG1233 0.1355 0.1636 0.3174 0.0639 0.3195 1424
CG12391 0.1406 0.2703 0.2855 0.0629 0.2407 6108
CG12605 0.1290 0.1911 0.2834 0.1133 0.2831 3673
CG12744 0.1235 0.3461 0.2400 0.0974 0.1930 575
CG12768 0.0863 0.2531 0.2042 0.1563 0.3001 1043
CG12769 0.1259 0.1400 0.3025 0.0991 0.3325 10209
CG12942 0.1252 0.3536 0.2267 0.0423 0.2521 591
CG13123 0.1054 0.3238 0.2507 0.0798 0.2403 1053
CG13204 0.1760 0.0991 0.3447 0.0906 0.2895 8061
CG13287 0.0482 0.5370 0.0879 0.2512 0.0757 4084
CG13296 0.1116 0.2133 0.2651 0.1154 0.2946 3995
CG13775 0.1355 0.2833 0.2644 0.1005 0.2163 1373
CG13894 0.1686 0.1453 0.3135 0.0799 0.2927 6607
CG13897 0.1466 0.1188 0.3375 0.1239 0.2731 791
CG14014 0.1234 0.2145 0.2698 0.1055 0.2867 2009
CG14050 0.1514 0.1850 0.3211 0.0398 0.3028 654
CG14441 0.1313 0.1608 0.3130 0.0928 0.3021 2208
CG14655 0.1955 0.0827 0.3883 0.0269 0.3067 6508
CG14667 0.1933 0.1371 0.3531 0.0583 0.2581 926
CG14710 0.1261 0.3274 0.2389 0.1163 0.1914 7716
CG14711 0.0523 0.4191 0.1610 0.1433 0.2243 1186
CG14860 0.1035 0.4085 0.1675 0.2062 0.1143 2328
CG14965 0.2053 0.1211 0.3526 0.1211 0.2000 190
CG15011 0.1547 0.1154 0.3456 0.0458 0.3385 1985
CG15073 0.1022 0.2581 0.3011 0.1505 0.1882 186
CG15269 0.1456 0.1359 0.3360 0.0640 0.3185 5137
CG1529 0.1735 0.1103 0.3310 0.0481 0.3370 997
CG15336 0.1498 0.1305 0.3280 0.0783 0.3135 6683
CG15436 0.0342 0.6288 0.0728 0.2120 0.0522 1840
CG15514 0.0638 0.4936 0.1358 0.1624 0.1444 3041
CG15601 0.1325 0.2663 0.2714 0.0999 0.2300 2974
CG15696 0.1870 0.1853 0.3502 0.0347 0.2428 1759
CG15710 0.1620 0.1408 0.3427 0.0648 0.2897 6980
CG15812 0.0837 0.3724 0.2033 0.1443 0.1962 1254
CG1602 0.1597 0.2361 0.3252 0.0255 0.2535 864
CG1603 0.1288 0.2768 0.2810 0.0925 0.2210 5969
CG1620 0.0615 0.5697 0.0970 0.1557 0.1161 732
CG1647 0.1419 0.2907 0.2349 0.1186 0.2140 430
CG1663 0.1958 0.0970 0.3844 0.0383 0.2845 8120
CG16779 0.1436 0.1371 0.3189 0.1246 0.2758 6629
CG16813 0.1100 0.3998 0.1765 0.2153 0.0985 3382
CG16815 0.2152 0.1650 0.3754 0.0081 0.2362 618
CG16863 0.1528 0.2000 0.3028 0.0806 0.2639 720
CG17186 0.0177 0.6885 0.0344 0.2208 0.0385 960
CG17328 0.1655 0.1471 0.3474 0.0936 0.2464 2447
CG17359 0.1415 0.1645 0.3188 0.0784 0.2968 5040
CG17361 0.1529 0.2291 0.3228 0.0495 0.2458 4003
CG17385 0.0890 0.2171 0.2515 0.1649 0.2774 2123
CG17568 0.1171 0.1559 0.2953 0.1052 0.3264 2604
CG17612 0.2161 0.0828 0.2805 0.1701 0.2506 435
CG17801 0.0788 0.2931 0.1673 0.2113 0.2496 2272
CG17802 0.0812 0.3971 0.2536 0.1090 0.1591 899
CG17806 0.1787 0.1179 0.3539 0.0476 0.3020 6448
CG17829 0.1258 0.3190 0.2425 0.1162 0.1965 5533
CG1792 0.1111 0.2527 0.2462 0.1242 0.2658 459
CG18011 0.1538 0.3462 0.1971 0.1587 0.1442 624
CG18262 0.1603 0.1816 0.3286 0.0649 0.2647 7243
CG18476 0.1617 0.2096 0.2870 0.0638 0.2779 439
CG18599 0.1810 0.1156 0.3485 0.0522 0.3027 6858
CG18764 0.1347 0.3194 0.2569 0.0625 0.2264 720
CG2116 0.0325 0.6679 0.0661 0.1726 0.0610 2526
CG2120 0.1211 0.2902 0.2532 0.0767 0.2588 4707
CG2129 0.0337 0.6092 0.0481 0.2762 0.0327 1039
CG2199 0.1424 0.1297 0.3104 0.1340 0.2835 5203
CG2202 0.1462 0.1653 0.3222 0.0973 0.2691 1676
CG2678 0.1554 0.1426 0.3351 0.0581 0.3088 6249
CG2712 0.1540 0.2540 0.2976 0.0662 0.2283 6001
CG2889 0.1806 0.0803 0.3459 0.1818 0.2113 847
CG30020 0.0970 0.3721 0.1644 0.1976 0.1689 4494
CG3032 0.1555 0.1792 0.3336 0.0623 0.2694 5363
CG30403 0.1389 0.2764 0.2844 0.0432 0.2571 3376
CG30431 0.1934 0.1005 0.4135 0.0204 0.2723 786
CG3065 0.1477 0.2036 0.3333 0.1208 0.1946 447
CG31224 0.1551 0.1570 0.3130 0.0761 0.2988 1051
CG31365 0.1315 0.2456 0.2658 0.1302 0.2268 745
CG31388 0.1549 0.2958 0.3944 0.0423 0.1127 71
CG31441 0.1778 0.1737 0.3474 0.0360 0.2651 3391
CG31627 0.1696 0.1764 0.3403 0.0301 0.2835 3520
CG3163 0.0780 0.3448 0.2100 0.2014 0.1658 1743
CG32006 0.1903 0.0840 0.3875 0.0218 0.3164 7623
CG32121 0.1283 0.1569 0.2973 0.1000 0.3176 4622
CG32532 0.1240 0.2670 0.2391 0.1350 0.2348 3547
CG32767 0.1143 0.2028 0.2549 0.1373 0.2907 1479
CG32772 0.1693 0.1330 0.3326 0.0909 0.2742 1849
CG3281 0.1010 0.2198 0.2512 0.1015 0.3265 2257
CG33017 0.0674 0.3019 0.1967 0.1237 0.3102 1083
CG33213 0.1017 0.4914 0.1672 0.1237 0.1160 1681
CG33557 0.1319 0.2058 0.2968 0.1131 0.2524 1759
CG3407 0.1798 0.1043 0.3489 0.0309 0.3362 940
CG34224 0.0466 0.5179 0.0875 0.2591 0.0889 2744
CG34367 0.1883 0.1006 0.3585 0.0443 0.3083 2932
CG34376 0.0807 0.2836 0.1745 0.1827 0.2785 4362
CG3726 0.1932 0.0544 0.3189 0.2430 0.1904 1066
CG3838 0.0923 0.2667 0.2410 0.1949 0.2051 195
CG3847 0.0923 0.4061 0.1993 0.1507 0.1516 2428
CG3919 0.1862 0.1181 0.3540 0.0636 0.2782 5108
CG3995 0.0402 0.5587 0.0832 0.2153 0.1026 1491
CG42726 0.0891 0.3565 0.1603 0.3112 0.0828 2233
CG42741 0.0467 0.4472 0.0975 0.2926 0.1160 5438
CG4282 0.0841 0.3819 0.1424 0.2557 0.1359 309
CG4318 0.1897 0.0799 0.3993 0.0162 0.3149 4944
CG4328 0.1384 0.2315 0.2243 0.0716 0.3341 419
CG43347 0.1233 0.3173 0.2604 0.0343 0.2648 1371
CG4360 0.1208 0.1171 0.2774 0.2293 0.2554 3262
CG43689 0.1461 0.0745 0.3209 0.1576 0.3009 349
CG44002 0.1814 0.1189 0.3705 0.0304 0.2987 3843
CG4404 0.2056 0.0888 0.4048 0.0952 0.2056 1250
CG4424 0.1586 0.2160 0.3184 0.0467 0.2603 1583
CG4496 0.1495 0.1433 0.3146 0.1169 0.2757 8146
CG4617 0.0025 0.3314 0.0074 0.5844 0.0743 2031
CG4707 0.1131 0.1464 0.3536 0.0665 0.3203 1052
CG4730 0.1713 0.1149 0.3563 0.0644 0.2931 870
CG4820 0.1770 0.1805 0.3517 0.0363 0.2544 853
CG4854 0.0749 0.3191 0.1912 0.1590 0.2558 868
CG4936 0.0504 0.4530 0.1018 0.2962 0.0986 4402
CG5180 0.1199 0.2113 0.2912 0.1470 0.2306 2428
CG5245 0.1720 0.1864 0.3295 0.0491 0.2630 692
CG5953 0.1258 0.0969 0.3007 0.2294 0.2472 898
CG6163 0.1589 0.1233 0.3289 0.0933 0.2956 7868
CG6254 0.1740 0.1726 0.3140 0.0792 0.2603 707
CG6272 0.1582 0.2784 0.2427 0.1538 0.1668 923
CG6276 0.1560 0.1101 0.3436 0.0515 0.3388 4794
CG6654 0.1622 0.1509 0.3401 0.0608 0.2860 444
CG6683 0.0767 0.3028 0.2032 0.1750 0.2423 743
CG6689 0.1681 0.1551 0.3456 0.0521 0.2791 2766
CG6765 0.0828 0.2038 0.2261 0.1306 0.3567 314
CG6791 0.1097 0.3560 0.1897 0.2242 0.1205 3885
CG6808 0.1685 0.1186 0.3433 0.0636 0.3061 4326
CG6813 0.1698 0.1098 0.3316 0.0293 0.3594 1366
CG7101 0.0721 0.3820 0.1659 0.1347 0.2453 2495
CG7271 0.1775 0.2090 0.2989 0.1303 0.1843 445
CG7357 0.1536 0.2202 0.2946 0.1006 0.2310 1680
CG7368 0.1690 0.1241 0.3644 0.0402 0.3023 2610
CG7372 0.1756 0.1331 0.3354 0.0592 0.2966 1908
CG7691 0.0371 0.5783 0.0753 0.2357 0.0736 1807
CG7745 0.1592 0.1357 0.3109 0.1048 0.2895 1489
CG7786 0.1013 0.3410 0.2333 0.0821 0.2423 780
CG7963 0.0876 0.4442 0.1452 0.2278 0.0951 1997
CG7987 0.0933 0.2449 0.2048 0.1966 0.2604 3022
CG8089 0.1270 0.2165 0.2684 0.1328 0.2554 693
CG8119 0.1656 0.1143 0.3484 0.0625 0.3092 6691
CG8159 0.1912 0.1121 0.3729 0.0400 0.2838 8503
CG8281 0.1636 0.0981 0.3407 0.0543 0.3432 1620
CG8301 0.1705 0.0993 0.3621 0.0397 0.3283 6667
CG8319 0.1910 0.1064 0.3597 0.0348 0.3080 1607
CG8388 0.1696 0.1506 0.3503 0.0463 0.2831 2589
CG8478 0.0918 0.3229 0.2122 0.2277 0.1454 4072
CG8765 0.1936 0.1747 0.3537 0.1237 0.1543 687
CG8924 0.1316 0.2058 0.2802 0.1173 0.2650 6860
CG8944 0.1536 0.2431 0.2761 0.0987 0.2285 547
CG9215 0.1449 0.2119 0.3015 0.1189 0.2228 1194
CG9609 0.1278 0.3338 0.2481 0.0887 0.2015 665
CG9727 0.1642 0.1745 0.3303 0.0504 0.2807 2601
CG9876 0.1349 0.3495 0.2111 0.1349 0.1696 289
CG9932 0.1144 0.3060 0.2464 0.1286 0.2046 3445
CG9948 0.1962 0.0947 0.3855 0.0257 0.2980 5725
CHES-1-like 0.0350 0.4700 0.1000 0.2687 0.1263 800
CTCF 0.1688 0.2756 0.2813 0.1460 0.1284 8782
CTPsyn 0.1300 0.1706 0.2725 0.1601 0.2668 4415
Camta 0.1319 0.2418 0.2802 0.0897 0.2564 546
Cf2 0.0432 0.4201 0.0899 0.3361 0.1107 1690
CkIIα-i1 0.1881 0.1089 0.2673 0.1683 0.2673 101
Clamp 0.1390 0.0833 0.3018 0.3227 0.1532 5281
Clk 0.1060 0.2581 0.2442 0.0737 0.3180 217
CoRest 0.1263 0.3253 0.2816 0.0521 0.2146 4417
Coop 0.1508 0.1499 0.3022 0.1478 0.2493 4709
CrebA 0.1160 0.2285 0.2617 0.0980 0.2958 3725
CrebB 0.0883 0.2650 0.2138 0.1572 0.2756 566
Crg-1 0.0884 0.3242 0.1747 0.1432 0.2695 475
D 0.1823 0.1122 0.3740 0.0697 0.2619 2024
D1 0.1653 0.1501 0.3490 0.0821 0.2535 3570
D19A 0.1615 0.1412 0.3354 0.0653 0.2966 6861
D19B 0.1455 0.2019 0.3177 0.0354 0.2995 1045
Dbx 0.1100 0.2653 0.2048 0.2283 0.1916 2646
Deaf1 0.1164 0.2429 0.2638 0.1523 0.2246 9783
Dfd 0.1968 0.1190 0.3188 0.1913 0.1741 2378
Dif 0.0857 0.3902 0.2066 0.1353 0.1821 1389
Dip2 0.2763 0.1518 0.3891 0.0739 0.1089 257
Dlip3 0.0911 0.4081 0.2102 0.0630 0.2277 571
Dll 0.0791 0.3845 0.1454 0.2677 0.1233 4655
Doc2 0.1926 0.0369 0.3484 0.2008 0.2213 244
Doc3 0.0485 0.4965 0.1046 0.2703 0.0801 1998
Dp 0.0553 0.5168 0.0953 0.2366 0.0960 7012
Dref 0.0826 0.5245 0.1550 0.1752 0.0627 3413
Drgx 0.1449 0.1374 0.3313 0.0740 0.3124 4664
E(bx) 0.0818 0.4554 0.1641 0.1881 0.1106 8031
E(spl)m3-HLH 0.1644 0.2318 0.3128 0.0233 0.2678 1247
E(spl)m5-HLH 0.1568 0.1661 0.3199 0.0839 0.2733 644
E(spl)m7-HLH 0.1529 0.1318 0.3341 0.0918 0.2894 425
E(spl)m8-HLH 0.1847 0.1398 0.3427 0.0587 0.2741 3969
E(spl)mbeta-HLH 0.1272 0.2085 0.2763 0.1151 0.2730 11800
E(spl)mdelta-HLH 0.1169 0.2323 0.2438 0.1908 0.2162 1300
E(spl)mgamma-HLH 0.1427 0.2582 0.3115 0.0229 0.2647 918
E(var)3-9 0.1227 0.3551 0.2454 0.0209 0.2559 383
E2f1 0.1512 0.1949 0.2957 0.0880 0.2702 1647
E2f2 0.0696 0.5164 0.1321 0.1666 0.1152 4495
ERR 0.0738 0.2884 0.1651 0.2441 0.2285 1151
EcR 0.1340 0.1161 0.2938 0.1221 0.3340 14259
Eip74EF 0.1142 0.1919 0.2646 0.1061 0.3232 3450
Eip75B 0.1692 0.1269 0.3366 0.0601 0.3073 5161
Eip78C 0.1881 0.1042 0.3682 0.0337 0.3058 4663
Eip93F 0.1455 0.2006 0.2994 0.0749 0.2797 708
Ets21C 0.1832 0.1336 0.3709 0.0182 0.2942 1812
Ets65A 0.0991 0.4138 0.2220 0.1056 0.1595 464
Ets96B 0.1800 0.1191 0.3681 0.0451 0.2877 6104
Ets97D 0.0517 0.6398 0.0889 0.1717 0.0479 2149
Ets98B 0.1340 0.1766 0.2905 0.1004 0.2985 4761
Fer1 0.0959 0.2744 0.2014 0.1761 0.2522 3878
Fer2 0.1192 0.3066 0.2603 0.0462 0.2676 411
Fer3 0.1301 0.2147 0.2944 0.0637 0.2971 1868
FoxK 0.0264 0.5277 0.0695 0.2915 0.0849 1626
FoxL1 0.1426 0.1001 0.3031 0.1048 0.3494 1059
FoxP 0.1505 0.1357 0.3162 0.0879 0.3097 3846
GATAd 0.1266 0.2751 0.2751 0.0742 0.2489 229
GATAe 0.0858 0.2515 0.2089 0.1151 0.3387 1364
Gsc 0.2514 0.0391 0.4106 0.0950 0.2039 358
Gug 0.1705 0.1511 0.3410 0.0487 0.2886 3877
H15 0.1907 0.1017 0.3457 0.1108 0.2511 1426
H2.0 0.1660 0.1766 0.3223 0.0709 0.2642 1325
HGTX 0.0601 0.3734 0.1246 0.3060 0.1358 3725
HHEX 0.1340 0.1553 0.2971 0.0728 0.3408 1030
HLH3B 0.1510 0.1483 0.3359 0.0748 0.2899 2218
HLH4C 0.0906 0.4008 0.1485 0.2455 0.1145 3144
HLH54F 0.0821 0.4576 0.1952 0.0686 0.1965 743
Hand 0.1385 0.2102 0.2787 0.0908 0.2818 628
Hey 0.1860 0.1132 0.3512 0.0629 0.2868 1925
HmgD 0.0662 0.4595 0.1356 0.2555 0.0831 951
HmgZ 0.0592 0.4599 0.1385 0.1864 0.1560 3090
Hmx 0.0889 0.3074 0.2444 0.0926 0.2667 270
Hnf4 0.1293 0.2330 0.2551 0.1123 0.2703 3171
Hr3 0.1253 0.3152 0.2770 0.0350 0.2475 1285
Hr38 0.1972 0.0423 0.4225 0.0704 0.2676 71
Hr39 0.1875 0.1082 0.3637 0.0682 0.2725 4944
Hr4 0.1807 0.1066 0.3686 0.0223 0.3217 4924
Hr51 0.1741 0.1424 0.3453 0.0521 0.2860 6466
Hr78 0.1305 0.1527 0.2895 0.0874 0.3398 7033
Hr83 0.0888 0.3043 0.1949 0.1785 0.2336 1216
Hr96 0.0971 0.3146 0.2157 0.1453 0.2273 1122
Hsf 0.1339 0.3212 0.2618 0.0521 0.2309 1650
Jra 0.1052 0.2845 0.2223 0.1283 0.2598 1255
Kah 0.0848 0.2578 0.1934 0.2027 0.2612 1179
Klf15 0.0859 0.3573 0.1908 0.1379 0.2281 1153
Kr 0.2011 0.0884 0.4009 0.0399 0.2696 701
Kr-h1 0.0610 0.3884 0.1286 0.2772 0.1448 4938
Lim3 0.1593 0.0885 0.4159 0.1150 0.2212 226
M1BP 0.0110 0.5887 0.0219 0.3312 0.0472 2373
MBD-R2 0.0328 0.3481 0.0718 0.4546 0.0927 3775
MESR4 0.0239 0.2098 0.0455 0.5832 0.1376 5852
MTF-1 0.1286 0.1732 0.2796 0.1115 0.3070 583
Mabi 0.1412 0.1440 0.2814 0.1533 0.2801 6112
Mad 0.0812 0.4404 0.1498 0.1588 0.1697 554
Max 0.0653 0.4635 0.0881 0.2361 0.1469 919
Med 0.1187 0.2920 0.2548 0.1196 0.2149 2308
Mef2 0.0854 0.2956 0.1726 0.2392 0.2072 6640
Meics 0.1372 0.1932 0.3105 0.0575 0.3016 2712
Mes2 0.0712 0.3694 0.1873 0.2032 0.1689 1516
Met 0.1846 0.1189 0.3575 0.0379 0.3010 5465
Mnt 0.0410 0.3680 0.0926 0.2955 0.2029 2538
Mondo 0.0960 0.1920 0.3120 0.1120 0.2880 125
Mrtf 0.2061 0.0867 0.3566 0.1357 0.2150 1349
Myb 0.0625 0.6207 0.0863 0.1743 0.0561 2352
Myc 0.1005 0.3862 0.1856 0.2106 0.1171 3195
NC2alpha 0.1221 0.2300 0.2723 0.1737 0.2019 213
NC2beta 0.0863 0.3425 0.1946 0.1975 0.1791 1413
NFAT 0.1098 0.2750 0.2244 0.2141 0.1767 1658
NK7.1 0.1314 0.2628 0.2774 0.0876 0.2409 137
Neu2 0.1422 0.1896 0.2464 0.2299 0.1919 422
Nf-YA 0.1187 0.1990 0.3094 0.1406 0.2323 960
Nf-YB 0.1540 0.1854 0.3409 0.0896 0.2301 5415
NfI 0.1162 0.2632 0.2815 0.0790 0.2601 1911
Oaz 0.1512 0.1179 0.3488 0.0963 0.2857 602
OdsH 0.1779 0.1260 0.3542 0.0381 0.3038 7374
Oli 0.1748 0.1178 0.3830 0.0247 0.2997 3804
Opbp 0.0796 0.4159 0.1505 0.2659 0.0881 3381
Optix 0.1853 0.0965 0.3533 0.1139 0.2510 1036
PHDP 0.1288 0.2134 0.2817 0.0896 0.2865 5033
Pdp1 0.1166 0.1922 0.2460 0.1338 0.3114 9016
Plzf 0.1897 0.1189 0.3668 0.0313 0.2934 3517
Poxn 0.1375 0.1187 0.3500 0.1125 0.2812 160
Ptx1 0.1632 0.1661 0.3450 0.0382 0.2874 3455
REPTOR 0.0835 0.3707 0.1708 0.1837 0.1913 1856
REPTOR-BP 0.1301 0.2266 0.2880 0.0380 0.3173 684
Rel 0.1122 0.2112 0.2332 0.1548 0.2886 8985
Rfx 0.1080 0.2744 0.2452 0.1374 0.2349 4730
RunxB 0.0405 0.5734 0.0852 0.2162 0.0847 1901
Rx 0.1781 0.1188 0.3646 0.0843 0.2542 842
SREBP 0.1651 0.2023 0.3230 0.0528 0.2567 4374
Scr 0.0581 0.5125 0.0991 0.2488 0.0814 3268
Sidpn 0.0596 0.4673 0.1214 0.2261 0.1256 3105
Six4 0.1472 0.2280 0.3521 0.0346 0.2381 693
Smox 0.1934 0.1194 0.3709 0.0380 0.2783 6867
Snoo 0.1474 0.1761 0.3050 0.0944 0.2771 3941
Sox100B 0.1533 0.1566 0.3233 0.0457 0.3211 2694
Sox102F 0.1782 0.1088 0.3608 0.0448 0.3074 12105
Sox14 0.1444 0.1888 0.2891 0.0942 0.2836 4683
Sox15 0.1811 0.1171 0.3868 0.0129 0.3021 1546
SoxN 0.0636 0.4217 0.1575 0.2074 0.1499 2642
Sp1 0.1452 0.1745 0.3014 0.1153 0.2636 6108
Spps 0.1790 0.1765 0.3279 0.0688 0.2478 799
Sry-beta 0.0781 0.4153 0.1998 0.1546 0.1521 1216
Sry-delta 0.0556 0.5012 0.1076 0.2267 0.1089 4601
Stat92E 0.1036 0.2687 0.2079 0.2209 0.1988 2847
Su(H) 0.1180 0.0957 0.2391 0.3295 0.2177 17964
TFAM 0.1408 0.0845 0.3732 0.0423 0.3592 142
TfAP-2 0.0350 0.5706 0.0612 0.2736 0.0596 2485
Trl 0.1055 0.2293 0.2544 0.1658 0.2450 17055
Usf 0.1684 0.3010 0.3367 0.0408 0.1531 196
Vsx1 0.1295 0.1505 0.2833 0.0884 0.3483 2432
Vsx2 0.1363 0.2564 0.3084 0.0992 0.1997 1482
Xbp1 0.1354 0.2921 0.2844 0.0559 0.2322 2201
Xrp1 0.1724 0.1608 0.3338 0.0527 0.2803 4577
ZIPIC 0.0599 0.6431 0.0599 0.1853 0.0518 367
Zif 0.1131 0.3993 0.2162 0.1110 0.1604 5712
ab 0.1258 0.2781 0.2980 0.0662 0.2318 151
abd-A 0.2097 0.0760 0.3736 0.0406 0.3001 11188
ac 0.1692 0.1357 0.3291 0.0931 0.2729 1407
achi 0.1841 0.1337 0.3537 0.0444 0.2840 5176
acj6 0.1883 0.1086 0.3790 0.0191 0.3050 4557
al 0.1296 0.2742 0.2593 0.0744 0.2625 941
amos 0.0803 0.4939 0.1341 0.2267 0.0649 3511
aop 0.1370 0.2216 0.3061 0.1545 0.1808 343
ap 0.1715 0.1099 0.3626 0.0537 0.3024 764
apt 0.0496 0.5098 0.0940 0.2584 0.0882 2256
ara 0.1869 0.0926 0.3463 0.1236 0.2507 2290
ase 0.1614 0.1272 0.3375 0.1249 0.2490 1289
ato 0.0563 0.5073 0.1067 0.2480 0.0818 1847
az2 0.1656 0.1920 0.3469 0.0250 0.2705 1401
bab1 0.0732 0.3239 0.1382 0.2668 0.1979 5109
bab2 0.1675 0.2103 0.2909 0.0315 0.2997 794
bap 0.0368 0.5155 0.0724 0.3029 0.0724 2611
bbx 0.0577 0.4469 0.1178 0.2830 0.0946 3276
bcd 0.1446 0.2533 0.3027 0.0318 0.2676 1196
bigmax 0.0546 0.2937 0.1093 0.2787 0.2637 732
bin 0.0458 0.4716 0.0981 0.2983 0.0862 1834
bowl 0.1130 0.1803 0.2716 0.2043 0.2308 416
br 0.1430 0.1528 0.3011 0.1180 0.2850 4161
brk 0.1431 0.2059 0.2722 0.0805 0.2983 3677
bs 0.0454 0.5043 0.1202 0.2082 0.1220 1763
bsh 0.1562 0.1387 0.3340 0.0720 0.2991 9018
btn 0.2089 0.1266 0.3101 0.0886 0.2658 158
cad 0.1686 0.1280 0.3706 0.0796 0.2532 1797
cas 0.1338 0.2611 0.2420 0.2070 0.1561 314
cato 0.1281 0.3202 0.2906 0.0148 0.2463 203
caup 0.1276 0.2085 0.2558 0.0974 0.3105 1755
cbt 0.1330 0.1370 0.2986 0.1226 0.3089 1745
cg 0.1354 0.1222 0.2985 0.1245 0.3195 11860
chinmo 0.0993 0.2217 0.2408 0.1539 0.2843 9792
chn 0.1166 0.2754 0.2928 0.1117 0.2035 806
ci 0.1267 0.1730 0.2803 0.1708 0.2492 5966
cic 0.0770 0.2483 0.1816 0.1889 0.3042 6283
cnc 0.1009 0.1960 0.2197 0.1818 0.3015 4351
crc 0.0506 0.2278 0.2911 0.0506 0.3797 158
croc 0.2000 0.1299 0.3851 0.0253 0.2598 870
crol 0.1491 0.0971 0.3484 0.0814 0.3240 7037
crp 0.0212 0.5648 0.0408 0.2801 0.0931 3256
cwo 0.1198 0.1685 0.2791 0.0897 0.3430 5117
cyc 0.1796 0.1658 0.3437 0.0322 0.2787 3262
da 0.1452 0.3065 0.2137 0.1210 0.2137 248
dac 0.1690 0.1122 0.3751 0.0335 0.3103 1373
dan 0.2828 0.0354 0.3611 0.1540 0.1667 396
danr 0.1575 0.1422 0.3611 0.0547 0.2845 457
dati 0.1559 0.0814 0.3288 0.1593 0.2746 295
dimm 0.2074 0.0557 0.3375 0.0960 0.3034 323
disco-r 0.0833 0.2424 0.2348 0.1439 0.2955 132
dl 0.0695 0.3797 0.2262 0.1112 0.2135 1583
dmrt11E 0.1767 0.1858 0.3417 0.0484 0.2473 4419
dmrt93B 0.1873 0.1183 0.3907 0.0205 0.2832 1564
dmrt99B 0.1854 0.0947 0.3800 0.0349 0.3051 6992
dpn 0.1268 0.3143 0.2527 0.0711 0.2352 3376
drm 0.0342 0.4590 0.0694 0.3553 0.0821 3155
dsf 0.1268 0.2809 0.2349 0.0970 0.2604 1609
dsx 0.1733 0.1232 0.3358 0.0768 0.2908 9294
dve 0.0719 0.3609 0.1552 0.2108 0.2011 4226
dysf 0.1523 0.1475 0.3400 0.0863 0.2740 3953
eg 0.1438 0.1358 0.3256 0.0895 0.3053 7318
emc 0.1313 0.3737 0.2121 0.1313 0.1515 99
ems 0.0969 0.3138 0.2323 0.1462 0.2108 650
en 0.1209 0.1680 0.3176 0.0984 0.2951 488
erm 0.0421 0.5928 0.0636 0.2438 0.0577 1854
esg 0.1691 0.1463 0.3566 0.0169 0.3110 1360
eve 0.1571 0.0750 0.3404 0.0726 0.3549 6283
ewg 0.1132 0.3387 0.2360 0.1215 0.1907 2297
exex 0.1121 0.1891 0.2527 0.1024 0.3437 7975
ey 0.1726 0.1436 0.3359 0.0446 0.3032 2688
eyg 0.1066 0.2602 0.2414 0.1505 0.2414 319
fd102C 0.1985 0.0965 0.4244 0.0638 0.2168 549
fd19B 0.0375 0.5074 0.0732 0.2990 0.0828 2294
fd3F 0.0995 0.2342 0.3027 0.0385 0.3251 935
fd59A 0.2116 0.0815 0.3788 0.0211 0.3069 2183
fd96Ca 0.1523 0.1232 0.3280 0.0980 0.2985 4847
fd96Cb 0.1843 0.1178 0.3800 0.0084 0.3095 2029
fkh 0.1015 0.1784 0.2418 0.1436 0.3347 6116
foxo 0.1746 0.1554 0.3329 0.0442 0.2929 4776
fru 0.1611 0.1498 0.3127 0.0999 0.2765 5146
ftz-f1 0.0675 0.2567 0.1804 0.2440 0.2514 4340
gce 0.1522 0.1505 0.2896 0.1557 0.2520 1143
gcm 0.1523 0.1599 0.3049 0.0963 0.2865 4516
gcm2 0.0829 0.2524 0.2004 0.1927 0.2717 519
gem 0.1828 0.1158 0.3777 0.0294 0.2943 10622
gfzf 0.0402 0.5649 0.0682 0.2566 0.0701 4751
gl 0.1442 0.1348 0.2948 0.1089 0.3172 3745
grau 0.1394 0.2011 0.3074 0.0730 0.2791 6982
grh 0.1254 0.1514 0.3053 0.1195 0.2984 2034
grn 0.1464 0.1574 0.2762 0.0999 0.3201 4974
gsb 0.1193 0.1248 0.2871 0.2178 0.2510 721
gsb-n 0.1976 0.1223 0.3551 0.0531 0.2719 3016
gt 0.2774 0.0651 0.3459 0.1062 0.2055 292
ham 0.1966 0.0759 0.3414 0.1862 0.2000 290
hb 0.1256 0.2851 0.2153 0.2440 0.1300 2508
hbn 0.0350 0.6062 0.0566 0.2447 0.0576 1945
her 0.0671 0.3131 0.1603 0.2700 0.1896 2252
hkb 0.1314 0.2053 0.2640 0.1354 0.2640 4720
hng1 0.1013 0.3248 0.1968 0.1777 0.1993 1204
hng2 0.1470 0.1292 0.3051 0.1359 0.2829 449
hth 0.2576 0.0417 0.4254 0.0337 0.2416 2997
ind 0.1528 0.2522 0.2960 0.0336 0.2654 1669
insv 0.1128 0.1350 0.1958 0.3932 0.1632 15321
inv 0.0543 0.5341 0.1191 0.2288 0.0637 1805
jigr1 0.2057 0.1413 0.3399 0.1324 0.1807 559
jim 0.0931 0.1937 0.2387 0.2282 0.2462 666
jing 0.1762 0.1030 0.3809 0.0758 0.2641 2389
jumu 0.1203 0.3427 0.2168 0.1371 0.1832 715
kay 0.0987 0.2336 0.2104 0.1451 0.3122 3142
ken 0.1100 0.2951 0.2280 0.1945 0.1724 3219
klu 0.1752 0.1865 0.2830 0.1158 0.2395 622
kmg 0.1227 0.3273 0.2485 0.0742 0.2273 660
kni 0.1564 0.1241 0.3024 0.0950 0.3221 6389
knrl 0.0906 0.4851 0.1445 0.2018 0.0780 2859
l(1)sc 0.0586 0.4016 0.1163 0.3023 0.1212 4472
l(3)neo38 0.1843 0.0999 0.3761 0.0537 0.2859 4823
lab 0.1596 0.1236 0.3269 0.0633 0.3266 7468
lbe 0.1176 0.2985 0.2434 0.1162 0.2243 1360
lilli 0.0990 0.3326 0.2181 0.1148 0.2355 2595
lmd 0.1688 0.1576 0.3425 0.0620 0.2690 2677
lms 0.1376 0.2420 0.2935 0.0554 0.2715 4136
lola 0.1325 0.2484 0.2780 0.1092 0.2319 15066
lov 0.1579 0.1116 0.3084 0.2063 0.2157 2007
luna 0.0700 0.4600 0.2200 0.1000 0.1500 100
lz 0.1711 0.1716 0.3361 0.0371 0.2842 3642
maf-S 0.0944 0.3577 0.2177 0.1233 0.2070 657
mid 0.0445 0.4431 0.0870 0.3270 0.0983 3437
mirr 0.1200 0.1829 0.2550 0.1048 0.3373 5440
mld 0.0733 0.3808 0.1523 0.2862 0.1073 1733
nau 0.1235 0.1570 0.2798 0.1122 0.3275 3191
nerfin-1 0.1539 0.1819 0.2815 0.1273 0.2555 6207
nerfin-2 0.0744 0.4276 0.1422 0.2452 0.1106 1962
net 0.1694 0.1164 0.3415 0.0528 0.3200 5775
nom 0.1179 0.1805 0.2561 0.1626 0.2829 4538
nub 0.0492 0.4345 0.1046 0.3033 0.1084 3986
oc 0.1832 0.1020 0.3632 0.0566 0.2950 5600
odd 0.1350 0.1622 0.2941 0.0836 0.3251 1615
onecut 0.1190 0.1939 0.2592 0.1264 0.3015 3496
org-1 0.1526 0.1290 0.3481 0.0180 0.3523 721
otp 0.1515 0.1311 0.3156 0.1055 0.2962 1914
ouib 0.1901 0.1038 0.3727 0.0213 0.3120 2157
ovo 0.0663 0.3219 0.1562 0.1905 0.2651 845
p53 0.0873 0.3705 0.1777 0.1898 0.1747 332
pad 0.0795 0.3071 0.2082 0.1539 0.2512 3813
pan 0.1452 0.1601 0.3177 0.1045 0.2725 4429
pb 0.0996 0.2151 0.2231 0.2271 0.2351 502
pdm2 0.0513 0.4407 0.0903 0.3354 0.0823 1130
pdm3 0.1966 0.1056 0.3630 0.0238 0.3110 4714
peb 0.1749 0.1404 0.3564 0.0562 0.2721 463
pho 0.0760 0.4532 0.1769 0.0965 0.1974 684
phol 0.1364 0.2603 0.2826 0.1047 0.2160 8568
pita 0.1509 0.3262 0.2689 0.1461 0.1079 1677
pnt 0.1815 0.1895 0.3253 0.0417 0.2621 744
prd 0.1865 0.1470 0.3441 0.0959 0.2265 5170
prg 0.0604 0.4777 0.1601 0.1654 0.1365 381
pros 0.1793 0.1066 0.3532 0.0600 0.3009 8979
psq 0.1292 0.1743 0.2810 0.1199 0.2956 13592
pzg 0.0323 0.5789 0.0563 0.2753 0.0571 4795
ranshi 0.1430 0.1921 0.3155 0.0857 0.2636 1832
repo 0.0949 0.2708 0.2083 0.2153 0.2106 432
rgr 0.1535 0.1871 0.2899 0.0843 0.2853 3726
rib 0.0833 0.1986 0.2268 0.2228 0.2684 1777
rn 0.1712 0.1057 0.3588 0.0607 0.3035 1466
ro 0.2222 0.0754 0.3373 0.1389 0.2262 252
row 0.1335 0.2694 0.2890 0.0627 0.2453 8369
run 0.2095 0.1048 0.3086 0.0524 0.3247 1241
sage 0.1346 0.2227 0.2947 0.0731 0.2749 862
salm 0.1254 0.1767 0.2757 0.0862 0.3360 2122
salr 0.1958 0.0872 0.3750 0.0298 0.3122 9152
sc 0.1620 0.1044 0.3722 0.0669 0.2945 747
schlank 0.1222 0.1491 0.3154 0.0538 0.3594 409
scro 0.0521 0.5156 0.0888 0.2492 0.0944 2151
scrt 0.1577 0.1579 0.3142 0.0963 0.2740 5296
sd 0.1358 0.1402 0.2908 0.0814 0.3517 11580
sens 0.1775 0.1628 0.3361 0.0605 0.2630 479
sens-2 0.1525 0.1401 0.3307 0.1009 0.2758 892
seq 0.1304 0.1880 0.3065 0.1080 0.2672 2186
shn 0.0942 0.3339 0.2396 0.1182 0.2141 626
sim 0.1637 0.1396 0.3363 0.1156 0.2447 666
sima 0.1739 0.1884 0.2899 0.0870 0.2609 69
sisA 0.1772 0.1268 0.3634 0.0769 0.2558 2303
slbo 0.1333 0.2329 0.2838 0.1101 0.2399 4440
slou 0.1608 0.3520 0.2541 0.0513 0.1818 429
slp1 0.0319 0.6132 0.0575 0.2406 0.0569 1758
slp2 0.1700 0.2400 0.3000 0.0433 0.2467 300
sna 0.0476 0.4855 0.0948 0.2878 0.0844 2311
so 0.1186 0.1823 0.2854 0.1429 0.2709 2134
sob 0.1035 0.2734 0.2405 0.1569 0.2257 2977
sqz 0.1402 0.1150 0.3312 0.0848 0.3288 5130
sr 0.1144 0.1235 0.2890 0.1477 0.3254 2640
ss 0.1754 0.1010 0.3496 0.0755 0.2984 14985
ssp 0.1449 0.2940 0.2886 0.0921 0.1804 1857
stc 0.1460 0.1511 0.2903 0.1114 0.3011 1760
stwl 0.1149 0.4626 0.1854 0.1280 0.1091 5015
su(Hw) 0.1586 0.2039 0.3129 0.1130 0.2116 4532
sug 0.0905 0.2614 0.2130 0.1399 0.2953 7579
sv 0.1005 0.4293 0.2061 0.0750 0.1891 587
svp 0.1647 0.1278 0.3028 0.1016 0.3031 6242
tHMG1 0.0806 0.2672 0.2318 0.0982 0.3222 1018
tai 0.1408 0.1775 0.2824 0.0776 0.3217 1172
tap 0.1592 0.1559 0.3433 0.0415 0.3002 1206
term 0.0000 0.6216 0.1081 0.2432 0.0270 37
tgo 0.1581 0.1754 0.3528 0.0267 0.2871 2024
tin 0.1462 0.2844 0.2964 0.0447 0.2283 1498
tio 0.1713 0.1122 0.3691 0.0201 0.3274 1845
tj 0.1078 0.1510 0.2334 0.1469 0.3609 8658
tll 0.1664 0.1679 0.3268 0.1053 0.2337 6384
toe 0.0989 0.3563 0.2264 0.1144 0.2040 1294
topi 0.1723 0.1521 0.3386 0.0516 0.2853 4167
toy 0.1818 0.1212 0.2862 0.1515 0.2593 297
trem 0.0727 0.5802 0.1322 0.1332 0.0816 2942
trh 0.1489 0.1809 0.3617 0.0319 0.2766 94
ttk 0.1758 0.1283 0.3560 0.0654 0.2745 1621
tup 0.2165 0.1546 0.2990 0.0206 0.3093 97
twi 0.1685 0.1467 0.3310 0.0759 0.2779 5596
tx 0.0902 0.3951 0.2000 0.1195 0.1951 410
unc-4 0.0303 0.5856 0.0610 0.2572 0.0659 2640
unpg 0.1430 0.1669 0.3265 0.0683 0.2952 5399
ush 0.0720 0.3326 0.1395 0.2884 0.1674 3512
usp 0.1163 0.1526 0.2571 0.1491 0.3249 13866
vnd 0.0940 0.4291 0.1567 0.2019 0.1184 2298
vri 0.1270 0.1560 0.2751 0.1074 0.3345 8192
vvl 0.1383 0.1950 0.2907 0.1020 0.2740 6963
wdn 0.1441 0.2074 0.2765 0.1176 0.2544 680
wek 0.0869 0.2689 0.1978 0.1790 0.2674 1335
woc 0.1539 0.2017 0.3164 0.0510 0.2770 4744
wor 0.1796 0.0956 0.4119 0.0214 0.2916 607
z 0.1236 0.1979 0.2943 0.1519 0.2323 2613
zen 0.1709 0.2089 0.3183 0.0949 0.2070 6672
zen2 0.0591 0.5030 0.1386 0.2212 0.0781 1998
zf30C 0.1772 0.1229 0.3513 0.0866 0.2620 3775
zfh1 0.1729 0.1499 0.3063 0.1391 0.2318 3529
zfh2 0.0729 0.4818 0.1606 0.0946 0.1901 1152
zld 0.0741 0.4674 0.1464 0.1781 0.1340 567
Total 0.1335 0.2171 0.2749 0.1234 0.2511 1762045

## Sheet: s5.Worm_all peaks
TF	3P	5P<=500	5P>500	Exon	Intron	Total
B0261.1	468	523	826	243	443	2503
B0310.2	75	87	115	39	102	418
C04F5.9	71	658	199	80	77	1085
C16A3.4	160	1357	589	102	194	2402
C34B4.2	15	63	58	29	16	181
C38D4.7	75	148	157	30	100	510
D1046.2	252	356	455	285	293	1641
D2030.7	454	1306	656	266	400	3082
F10B5.3	133	300	205	75	95	808
F10E7.11	57	67	59	43	42	268
F22D6.2	139	314	250	54	87	844
F23B12.7	166	1044	380	127	203	1920
F26F4.8	172	119	304	140	243	978
F33H1.4	414	1538	668	227	403	3250
F37B4.10	161	165	262	199	160	947
F39B2.1	151	180	109	111	79	630
F44E2.7	159	158	279	125	175	896
F52B5.7	218	263	296	292	159	1228
F57C9.4	28	46	24	18	27	143
K09A11.1	71	217	175	19	96	578
K11D2.4	260	675	619	188	242	1984
K12H6.12	148	641	610	81	179	1659
M03D4.4	134	530	447	100	217	1428
R02D3.7	191	1442	486	154	167	2440
T07F8.4	91	153	174	41	104	563
T20F7.1	371	1281	819	283	364	3118
T22C8.4	325	662	610	228	590	2415
T23F11.4	59	188	173	30	95	545
Y105C5A.15	233	203	281	145	184	1046
Y22D7AL.16	52	128	127	27	75	409
Y48G9A.11	356	723	507	282	360	2228
Y53G8AR.9	511	825	564	547	295	2742
Y55F3AM.14	113	325	366	70	130	1004
Y56A3A.18	380	414	473	306	253	1826
Y5F2A.4	88	92	101	39	61	381
Y67H2A.10	87	339	178	38	67	709
Y75B8A.6	185	219	260	116	153	933
Y79H2A.3	255	306	193	161	106	1021
Y95B8A.8	301	591	372	236	194	1694
ZK185.1	206	591	374	129	179	1479
ZK337.2	140	334	307	91	171	1043
ZK546.5	106	667	193	72	57	1095
aha-1	73	343	228	47	73	764
ahr-1	36	161	70	8	59	334
alr-1	124	126	372	480	272	1374
aptf-2	112	345	251	73	111	892
aptf-3	164	151	223	122	125	785
arid-1	361	801	603	237	304	2306
atf-7	231	444	485	175	190	1525
athp-1	175	386	208	147	111	1027
attf-3	196	883	337	131	190	1737
attf-4	16	10	15	4	10	55
attf-5	204	1248	739	168	230	2589
attf-6	511	488	624	315	331	2269
bcl-11	439	2004	1889	236	561	5129
bed-1	125	100	162	101	101	589
bed-2	68	263	163	55	77	626
bed-3	82	185	176	29	115	587
blmp-1	785	3023	3622	517	1140	9087
cebp-1	907	2813	2484	780	1051	8035
cebp-2	284	243	372	304	216	1419
ceh-100	264	838	383	174	225	1884
ceh-13	56	107	119	20	89	391
ceh-14	111	578	451	60	151	1351
ceh-16	142	482	522	78	163	1387
ceh-18	220	1061	1138	138	319	2876
ceh-19	74	268	298	32	129	801
ceh-2	79	560	322	51	125	1137
ceh-20	286	816	996	168	366	2632
ceh-22	24	50	84	7	26	191
ceh-24	34	61	51	15	41	202
ceh-27	181	876	711	149	240	2157
ceh-30	32	195	99	27	40	393
ceh-31	215	1235	1022	126	346	2944
ceh-32	59	136	135	17	45	392
ceh-34	149	700	701	102	255	1907
ceh-36	225	331	563	122	513	1754
ceh-37	136	405	287	68	130	1026
ceh-38	558	1491	1244	333	961	4587
ceh-39	138	1094	491	161	145	2029
ceh-40	163	182	232	117	146	840
ceh-43	88	234	189	30	116	657
ceh-44	139	354	306	45	183	1027
ceh-45	79	160	156	37	116	548
ceh-48	162	781	511	159	330	1943
ceh-5	233	834	668	139	288	2162
ceh-51	144	496	292	42	184	1158
ceh-58	176	89	186	178	103	732
ceh-6	77	219	217	36	137	686
ceh-62	1	2	3	0	0	6
ceh-63	167	231	486	454	305	1643
ceh-79	60	53	46	29	31	219
ceh-8	115	467	442	127	147	1298
ceh-82	525	4168	2305	328	734	8060
ceh-83	1161	1570	2718	1742	2076	9267
ceh-88	140	609	374	84	142	1349
ceh-9	37	29	53	19	40	178
ceh-90	47	526	174	79	93	919
ceh-91	212	894	333	105	172	1716
ces-1	774	2395	3266	449	1362	8246
che-1	96	219	192	50	116	673
cnd-1	164	502	555	80	233	1534
cog-1	106	585	430	45	133	1299
crh-2	451	2215	1712	312	610	5300
ctbp-1	349	838	1061	233	430	2911
daf-12	20	22	26	2	9	79
daf-16	1007	3291	3211	673	1248	9430
daf-19	160	246	279	139	172	996
daf-8	60	55	85	27	55	282
die-1	190	259	384	91	206	1130
dmd-4	370	946	904	769	766	3755
dmd-6	652	2563	2586	565	972	7338
dmd-8	269	261	479	263	284	1556
dmd-9	191	455	377	151	205	1379
dox-1	453	1585	1260	564	579	4441
dpff-1	51	42	49	42	26	210
dpl-1	1184	10598	4513	881	1539	18715
drap-1	172	643	631	147	257	1850
dsc-1	432	1366	1739	280	606	4423
duxl-1	204	499	358	119	189	1369
dve-1	799	3171	2785	592	1168	8515
efl-1	1847	12583	5401	1382	2067	23280
efl-3	24	68	56	20	27	195
egl-13	99	575	439	56	143	1312
egl-18	125	187	203	94	90	699
egl-27	314	1235	1248	136	399	3332
egl-43	386	645	1011	598	506	3146
egl-44	240	429	473	169	226	1537
egl-5	133	738	641	100	203	1815
egrh-3	391	641	1000	814	408	3254
ekl-4	462	913	659	448	347	2829
elt-1	310	854	1314	192	422	3092
elt-2	1357	5837	4775	1333	1892	15194
elt-3	1091	3731	3739	611	1260	10432
elt-4	25	33	70	117	43	288
eor-1	45	146	144	14	57	406
ets-4	164	775	531	123	199	1792
ets-5	37	45	58	69	41	250
ets-7	63	209	199	29	96	596
eyg-1	45	184	169	21	68	487
fax-1	79	363	209	28	106	785
fkh-10	388	1458	1923	238	688	4695
fkh-2	19	41	47	2	6	115
fkh-3	69	47	60	59	37	272
fkh-4	54	297	190	37	69	647
fkh-6	52	232	171	34	84	573
fkh-7	94	297	309	46	120	866
fkh-8	266	1193	1187	154	359	3159
flh-1	44	99	97	16	69	325
fos-1	698	3733	2921	520	1011	8883
gei-17	169	332	306	112	135	1054
gei-8	167	223	363	124	172	1049
gmeb-1	354	2028	1155	280	453	4270
gmeb-2	72	194	159	23	104	552
grh-1	233	970	783	188	296	2470
ham-2	169	503	791	91	303	1857
hif-1	401	1649	1380	251	426	4107
hlh-1	164	735	882	116	267	2164
hlh-11	721	2695	2915	612	982	7925
hlh-12	21	7	18	1	17	64
hlh-13	51	105	95	12	78	341
hlh-15	42	108	59	10	50	269
hlh-17	33	27	59	77	37	233
hlh-26	15	14	14	14	19	76
hlh-30	765	3213	3238	535	1071	8822
hlh-4	51	152	141	38	55	437
hlh-6	120	287	359	198	186	1150
hlh-8	104	475	385	46	135	1145
hmbx-1	64	109	85	24	61	343
hmg-1.1	384	1628	1551	306	545	4414
hmg-11	334	1960	1722	347	528	4891
hmg-20	174	342	249	100	130	995
hmg-4	270	865	1210	390	474	3209
hnd-1	98	261	171	58	125	713
hsf-1	534	797	705	525	374	2935
irx-1	117	803	437	78	150	1585
2024-06-01	417	1963	1442	217	439	4478
klf-2	150	316	309	70	187	1032
lag-1	63	73	94	55	37	322
let-526	174	403	359	107	157	1200
let-607	285	1138	734	194	274	2625
lim-6	46	269	152	15	76	558
lim-7	309	333	520	290	352	1804
lin-1	302	764	752	134	353	2305
lin-11	196	1148	723	133	286	2486
lin-13	776	4304	2417	457	935	8889
lin-14	816	2635	4079	397	1421	9348
lin-15B	228	3185	1047	227	320	5007
lin-26	492	648	936	607	504	3187
lin-29	137	314	262	72	121	906
lin-32	94	219	299	39	147	798
lin-38	787	2118	1217	632	797	5551
lin-39	429	2242	1979	295	701	5646
lin-40	641	1816	1829	516	634	5436
lin-54	429	1657	776	370	360	3592
lir-1	127	551	317	62	152	1209
lir-3	294	1175	880	151	316	2816
lsl-1	362	1719	619	245	452	3397
lsy-12	233	581	491	203	210	1718
lsy-2	2833	13431	9960	1589	3723	31536
lsy-27	39	67	50	13	48	217
mab-5	204	947	832	99	325	2407
mab-9	153	610	447	112	170	1492
madf-10	308	910	724	185	296	2423
madf-2	75	298	219	36	108	736
madf-3	447	829	599	601	265	2741
madf-5	383	377	568	310	351	1989
madf-6	741	1904	1021	805	589	5060
madf-8	226	1027	413	112	199	1977
madf-9	231	536	509	121	240	1637
mbf-1	30	28	26	1	10	95
mcd-1	490	1808	1110	504	548	4460
mdl-1	1028	4696	4792	562	1447	12525
mec-3	165	343	322	107	208	1145
med-1	64	221	158	39	97	579
mef-2	40	269	230	22	58	619
mel-28	31	47	34	13	12	137
mep-1	1210	5806	4281	791	1459	13547
mls-2	171	601	704	105	299	1880
mml-1	19	40	56	1	22	138
mxl-1	70	52	111	16	78	327
mxl-2	150	253	347	88	171	1009
mxl-3	354	1240	1418	307	482	3801
nfya-1	953	4163	4042	709	1653	11520
nfya-2	108	81	82	106	58	435
nfyb-1	580	1111	1101	622	634	4048
nhr-10	93	234	216	37	72	652
nhr-102	575	1154	929	465	458	3581
nhr-11	415	1696	1588	270	531	4500
nhr-111	55	45	71	38	45	254
nhr-12	45	131	97	11	37	321
nhr-120	117	97	176	127	93	610
nhr-129	450	2173	2029	374	670	5696
nhr-179	39	10	48	14	24	135
nhr-19	464	1799	1525	208	564	4560
nhr-2	186	558	736	74	289	1843
nhr-20	453	2124	1820	259	564	5220
nhr-21	355	1153	1092	214	334	3148
nhr-23	468	1882	1560	313	545	4768
nhr-232	73	183	188	40	116	600
nhr-237	190	1259	588	107	173	2317
nhr-25	1039	3747	3708	657	1223	10374
nhr-270	55	53	55	35	34	232
nhr-28	690	2990	2797	449	959	7885
nhr-41	182	323	395	52	184	1136
nhr-42	266	535	479	244	265	1789
nhr-43	266	703	562	141	189	1861
nhr-47	603	2184	2105	402	730	6024
nhr-48	336	935	1045	197	339	2852
nhr-6	329	1677	1287	228	386	3907
nhr-67	14	21	17	3	10	65
nhr-71	880	2813	3212	523	1124	8552
nhr-76	85	273	244	42	85	729
nhr-77	562	2576	1623	314	591	5666
nhr-80	829	3696	3293	980	1264	10062
nhr-84	23	48	26	23	17	137
nhr-85	196	792	689	72	199	1948
nhr-90	664	1900	1611	474	693	5342
npax-4	42	104	73	19	51	289
odd-2	114	176	272	127	186	875
pag-3	149	539	589	105	211	1593
pat-9	70	218	197	29	104	618
pax-1	51	303	180	41	56	631
pax-3	95	428	306	60	120	1009
peb-1	19	32	66	4	17	138
pes-1	245	522	498	105	405	1775
pha-2	66	206	167	18	97	554
pha-4	1438	5803	4935	903	1925	15004
php-3	423	1051	1160	392	533	3559
pop-1	157	245	290	51	210	953
pqm-1	724	3572	3059	666	1132	9153
pros-1	45	219	273	27	68	632
rcor-1	323	1023	555	185	292	2378
ref-1	124	155	208	28	160	675
ref-2	414	1228	1451	782	666	4541
repo-1	340	360	360	414	224	1698
rnt-1	612	2903	2589	480	908	7492
row-1	187	774	638	105	214	1918
saeg-2	188	358	447	136	178	1307
scrt-1	170	306	378	149	241	1244
sdz-12	113	160	209	184	135	801
sdz-38	19	8	25	6	10	68
sea-1	183	338	383	115	230	1249
sea-2	84	177	191	55	82	589
sem-2	95	164	193	59	132	643
sem-4	207	958	921	108	267	2461
skn-1	301	2222	1123	186	348	4180
sma-3	638	2034	1706	402	632	5412
sma-4	230	477	513	150	236	1606
sma-9	662	2406	2680	388	1005	7141
snai-1	51	112	80	15	75	333
snpc-4	2526	7810	5855	1129	3239	20559
snu-23	733	3056	3063	456	948	8256
somi-1	144	293	387	49	134	1007
sox-2	96	217	230	9	108	660
sox-4	205	848	666	120	295	2134
spr-3	159	333	307	181	155	1135
sptf-1	419	1311	1384	392	802	4308
sptf-2	34	58	53	39	47	231
sup-37	64	233	176	67	72	612
swsn-7	347	1930	1470	196	469	4412
syd-9	84	287	274	50	125	820
tab-1	221	381	516	150	291	1559
tag-97	51	84	101	48	37	321
tbx-11	160	295	308	73	206	1042
tbx-2	952	3869	3337	489	1155	9802
tbx-37	135	496	271	51	154	1107
tbx-7	58	356	127	30	69	640
tbx-8	48	97	91	15	57	308
tbx-9	66	44	46	43	42	241
tlp-1	18	44	56	8	16	142
tra-1	391	847	1156	281	493	3168
tra-4	46	75	60	21	40	242
ttx-3	101	352	207	53	132	845
unc-120	221	988	1125	131	344	2809
unc-130	441	2480	1138	298	464	4821
unc-3	148	442	323	34	214	1161
unc-30	13	27	35	13	10	98
unc-39	57	91	132	18	42	340
unc-42	283	1191	1425	156	555	3610
unc-55	481	2535	2186	287	752	6241
unc-62	397	1075	1561	170	573	3776
unc-86	271	1402	929	103	364	3069
vab-15	42	267	172	50	73	604
vab-7	250	530	552	158	325	1815
xbp-1	199	1580	768	135	259	2941
zag-1	164	753	747	77	195	1936
zfh-2	658	1023	2037	2474	893	7085
zfp-2	73	310	175	41	81	680
zim-3	294	298	469	474	327	1862
zip-11	77	73	103	25	65	343
zip-2	69	207	136	30	45	487
zip-4	109	502	301	107	128	1147
zip-5	56	308	107	20	71	562
zip-8	218	258	615	213	385	1689
znf-207	155	204	191	88	85	723
ztf-1	33	50	57	64	34	238
ztf-11	166	743	499	65	173	1646
ztf-16	57	258	133	28	76	552
ztf-18	247	1049	560	262	337	2455
ztf-22	91	177	207	47	79	601
ztf-23	291	821	699	192	389	2392
ztf-25	243	299	368	210	248	1368
ztf-26	173	361	380	104	149	1167
ztf-28	154	415	288	126	154	1137
ztf-29	134	316	383	50	231	1114
ztf-3	41	71	89	18	30	249
ztf-4	428	1340	1089	251	380	3488
ztf-6	86	212	184	37	86	605
ztf-7	209	900	561	102	234	2006
Total	94888	335746	281769	71838	116611	900852

## Sheet: s6.Worm_all peaks_fraction
TF 3P 5P<=500 5P>500 Exon Intron Total
B0261.1 0.1870 0.2089 0.3300 0.0971 0.1770 2503
B0310.2 0.1794 0.2081 0.2751 0.0933 0.2440 418
C04F5.9 0.0654 0.6065 0.1834 0.0737 0.0710 1085
C16A3.4 0.0666 0.5649 0.2452 0.0425 0.0808 2402
C34B4.2 0.0829 0.3481 0.3204 0.1602 0.0884 181
C38D4.7 0.1471 0.2902 0.3078 0.0588 0.1961 510
D1046.2 0.1536 0.2169 0.2773 0.1737 0.1785 1641
D2030.7 0.1473 0.4238 0.2128 0.0863 0.1298 3082
F10B5.3 0.1646 0.3713 0.2537 0.0928 0.1176 808
F10E7.11 0.2127 0.2500 0.2201 0.1604 0.1567 268
F22D6.2 0.1647 0.3720 0.2962 0.0640 0.1031 844
F23B12.7 0.0865 0.5437 0.1979 0.0661 0.1057 1920
F26F4.8 0.1759 0.1217 0.3108 0.1431 0.2485 978
F33H1.4 0.1274 0.4732 0.2055 0.0698 0.1240 3250
F37B4.10 0.1700 0.1742 0.2767 0.2101 0.1690 947
F39B2.1 0.2397 0.2857 0.1730 0.1762 0.1254 630
F44E2.7 0.1775 0.1763 0.3114 0.1395 0.1953 896
F52B5.7 0.1775 0.2142 0.2410 0.2378 0.1295 1228
F57C9.4 0.1958 0.3217 0.1678 0.1259 0.1888 143
K09A11.1 0.1228 0.3754 0.3028 0.0329 0.1661 578
K11D2.4 0.1310 0.3402 0.3120 0.0948 0.1220 1984
K12H6.12 0.0892 0.3864 0.3677 0.0488 0.1079 1659
M03D4.4 0.0938 0.3711 0.3130 0.0700 0.1520 1428
R02D3.7 0.0783 0.5910 0.1992 0.0631 0.0684 2440
T07F8.4 0.1616 0.2718 0.3091 0.0728 0.1847 563
T20F7.1 0.1190 0.4108 0.2627 0.0908 0.1167 3118
T22C8.4 0.1346 0.2741 0.2526 0.0944 0.2443 2415
T23F11.4 0.1083 0.3450 0.3174 0.0550 0.1743 545
Y105C5A.15 0.2228 0.1941 0.2686 0.1386 0.1759 1046
Y22D7AL.16 0.1271 0.3130 0.3105 0.0660 0.1834 409
Y48G9A.11 0.1598 0.3245 0.2276 0.1266 0.1616 2228
Y53G8AR.9 0.1864 0.3009 0.2057 0.1995 0.1076 2742
Y55F3AM.14 0.1125 0.3237 0.3645 0.0697 0.1295 1004
Y56A3A.18 0.2081 0.2267 0.2590 0.1676 0.1386 1826
Y5F2A.4 0.2310 0.2415 0.2651 0.1024 0.1601 381
Y67H2A.10 0.1227 0.4781 0.2511 0.0536 0.0945 709
Y75B8A.6 0.1983 0.2347 0.2787 0.1243 0.1640 933
Y79H2A.3 0.2498 0.2997 0.1890 0.1577 0.1038 1021
Y95B8A.8 0.1777 0.3489 0.2196 0.1393 0.1145 1694
ZK185.1 0.1393 0.3996 0.2529 0.0872 0.1210 1479
ZK337.2 0.1342 0.3202 0.2943 0.0872 0.1640 1043
ZK546.5 0.0968 0.6091 0.1763 0.0658 0.0521 1095
aha-1 0.0955 0.4490 0.2984 0.0615 0.0955 764
ahr-1 0.1078 0.4820 0.2096 0.0240 0.1766 334
alr-1 0.0902 0.0917 0.2707 0.3493 0.1980 1374
aptf-2 0.1256 0.3868 0.2814 0.0818 0.1244 892
aptf-3 0.2089 0.1924 0.2841 0.1554 0.1592 785
arid-1 0.1565 0.3474 0.2615 0.1028 0.1318 2306
atf-7 0.1515 0.2911 0.3180 0.1148 0.1246 1525
athp-1 0.1704 0.3759 0.2025 0.1431 0.1081 1027
attf-3 0.1128 0.5083 0.1940 0.0754 0.1094 1737
attf-4 0.2909 0.1818 0.2727 0.0727 0.1818 55
attf-5 0.0788 0.4820 0.2854 0.0649 0.0888 2589
attf-6 0.2252 0.2151 0.2750 0.1388 0.1459 2269
bcl-11 0.0856 0.3907 0.3683 0.0460 0.1094 5129
bed-1 0.2122 0.1698 0.2750 0.1715 0.1715 589
bed-2 0.1086 0.4201 0.2604 0.0879 0.1230 626
bed-3 0.1397 0.3152 0.2998 0.0494 0.1959 587
blmp-1 0.0864 0.3327 0.3986 0.0569 0.1255 9087
cebp-1 0.1129 0.3501 0.3091 0.0971 0.1308 8035
cebp-2 0.2001 0.1712 0.2622 0.2142 0.1522 1419
ceh-100 0.1401 0.4448 0.2033 0.0924 0.1194 1884
ceh-13 0.1432 0.2737 0.3043 0.0512 0.2276 391
ceh-14 0.0822 0.4278 0.3338 0.0444 0.1118 1351
ceh-16 0.1024 0.3475 0.3764 0.0562 0.1175 1387
ceh-18 0.0765 0.3689 0.3957 0.0480 0.1109 2876
ceh-19 0.0924 0.3346 0.3720 0.0400 0.1610 801
ceh-2 0.0695 0.4925 0.2832 0.0449 0.1099 1137
ceh-20 0.1087 0.3100 0.3784 0.0638 0.1391 2632
ceh-22 0.1257 0.2618 0.4398 0.0366 0.1361 191
ceh-24 0.1683 0.3020 0.2525 0.0743 0.2030 202
ceh-27 0.0839 0.4061 0.3296 0.0691 0.1113 2157
ceh-30 0.0814 0.4962 0.2519 0.0687 0.1018 393
ceh-31 0.0730 0.4195 0.3471 0.0428 0.1175 2944
ceh-32 0.1505 0.3469 0.3444 0.0434 0.1148 392
ceh-34 0.0781 0.3671 0.3676 0.0535 0.1337 1907
ceh-36 0.1283 0.1887 0.3210 0.0696 0.2925 1754
ceh-37 0.1326 0.3947 0.2797 0.0663 0.1267 1026
ceh-38 0.1216 0.3250 0.2712 0.0726 0.2095 4587
ceh-39 0.0680 0.5392 0.2420 0.0793 0.0715 2029
ceh-40 0.1940 0.2167 0.2762 0.1393 0.1738 840
ceh-43 0.1339 0.3562 0.2877 0.0457 0.1766 657
ceh-44 0.1353 0.3447 0.2980 0.0438 0.1782 1027
ceh-45 0.1442 0.2920 0.2847 0.0675 0.2117 548
ceh-48 0.0834 0.4020 0.2630 0.0818 0.1698 1943
ceh-5 0.1078 0.3858 0.3090 0.0643 0.1332 2162
ceh-51 0.1244 0.4283 0.2522 0.0363 0.1589 1158
ceh-58 0.2404 0.1216 0.2541 0.2432 0.1407 732
ceh-6 0.1122 0.3192 0.3163 0.0525 0.1997 686
ceh-62 0.1667 0.3333 0.5000 0.0000 0.0000 6
ceh-63 0.1016 0.1406 0.2958 0.2763 0.1856 1643
ceh-79 0.2740 0.2420 0.2100 0.1324 0.1416 219
ceh-8 0.0886 0.3598 0.3405 0.0978 0.1133 1298
ceh-82 0.0651 0.5171 0.2860 0.0407 0.0911 8060
ceh-83 0.1253 0.1694 0.2933 0.1880 0.2240 9267
ceh-88 0.1038 0.4514 0.2772 0.0623 0.1053 1349
ceh-9 0.2079 0.1629 0.2978 0.1067 0.2247 178
ceh-90 0.0511 0.5724 0.1893 0.0860 0.1012 919
ceh-91 0.1235 0.5210 0.1941 0.0612 0.1002 1716
ces-1 0.0939 0.2904 0.3961 0.0545 0.1652 8246
che-1 0.1426 0.3254 0.2853 0.0743 0.1724 673
cnd-1 0.1069 0.3272 0.3618 0.0522 0.1519 1534
cog-1 0.0816 0.4503 0.3310 0.0346 0.1024 1299
crh-2 0.0851 0.4179 0.3230 0.0589 0.1151 5300
ctbp-1 0.1199 0.2879 0.3645 0.0800 0.1477 2911
daf-12 0.2532 0.2785 0.3291 0.0253 0.1139 79
daf-16 0.1068 0.3490 0.3405 0.0714 0.1323 9430
daf-19 0.1606 0.2470 0.2801 0.1396 0.1727 996
daf-8 0.2128 0.1950 0.3014 0.0957 0.1950 282
die-1 0.1681 0.2292 0.3398 0.0805 0.1823 1130
dmd-4 0.0985 0.2519 0.2407 0.2048 0.2040 3755
dmd-6 0.0889 0.3493 0.3524 0.0770 0.1325 7338
dmd-8 0.1729 0.1677 0.3078 0.1690 0.1825 1556
dmd-9 0.1385 0.3299 0.2734 0.1095 0.1487 1379
dox-1 0.1020 0.3569 0.2837 0.1270 0.1304 4441
dpff-1 0.2429 0.2000 0.2333 0.2000 0.1238 210
dpl-1 0.0633 0.5663 0.2411 0.0471 0.0822 18715
drap-1 0.0930 0.3476 0.3411 0.0795 0.1389 1850
dsc-1 0.0977 0.3088 0.3932 0.0633 0.1370 4423
duxl-1 0.1490 0.3645 0.2615 0.0869 0.1381 1369
dve-1 0.0938 0.3724 0.3271 0.0695 0.1372 8515
efl-1 0.0793 0.5405 0.2320 0.0594 0.0888 23280
efl-3 0.1231 0.3487 0.2872 0.1026 0.1385 195
egl-13 0.0755 0.4383 0.3346 0.0427 0.1090 1312
egl-18 0.1788 0.2675 0.2904 0.1345 0.1288 699
egl-27 0.0942 0.3706 0.3745 0.0408 0.1197 3332
egl-43 0.1227 0.2050 0.3214 0.1901 0.1608 3146
egl-44 0.1561 0.2791 0.3077 0.1100 0.1470 1537
egl-5 0.0733 0.4066 0.3532 0.0551 0.1118 1815
egrh-3 0.1202 0.1970 0.3073 0.2502 0.1254 3254
ekl-4 0.1633 0.3227 0.2329 0.1584 0.1227 2829
elt-1 0.1003 0.2762 0.4250 0.0621 0.1365 3092
elt-2 0.0893 0.3842 0.3143 0.0877 0.1245 15194
elt-3 0.1046 0.3576 0.3584 0.0586 0.1208 10432
elt-4 0.0868 0.1146 0.2431 0.4062 0.1493 288
eor-1 0.1108 0.3596 0.3547 0.0345 0.1404 406
ets-4 0.0915 0.4325 0.2963 0.0686 0.1110 1792
ets-5 0.1480 0.1800 0.2320 0.2760 0.1640 250
ets-7 0.1057 0.3507 0.3339 0.0487 0.1611 596
eyg-1 0.0924 0.3778 0.3470 0.0431 0.1396 487
fax-1 0.1006 0.4624 0.2662 0.0357 0.1350 785
fkh-10 0.0826 0.3105 0.4096 0.0507 0.1465 4695
fkh-2 0.1652 0.3565 0.4087 0.0174 0.0522 115
fkh-3 0.2537 0.1728 0.2206 0.2169 0.1360 272
fkh-4 0.0835 0.4590 0.2937 0.0572 0.1066 647
fkh-6 0.0908 0.4049 0.2984 0.0593 0.1466 573
fkh-7 0.1085 0.3430 0.3568 0.0531 0.1386 866
fkh-8 0.0842 0.3777 0.3758 0.0487 0.1136 3159
flh-1 0.1354 0.3046 0.2985 0.0492 0.2123 325
fos-1 0.0786 0.4202 0.3288 0.0585 0.1138 8883
gei-17 0.1603 0.3150 0.2903 0.1063 0.1281 1054
gei-8 0.1592 0.2126 0.3460 0.1182 0.1640 1049
gmeb-1 0.0829 0.4749 0.2705 0.0656 0.1061 4270
gmeb-2 0.1304 0.3514 0.2880 0.0417 0.1884 552
grh-1 0.0943 0.3927 0.3170 0.0761 0.1198 2470
ham-2 0.0910 0.2709 0.4260 0.0490 0.1632 1857
hif-1 0.0976 0.4015 0.3360 0.0611 0.1037 4107
hlh-1 0.0758 0.3396 0.4076 0.0536 0.1234 2164
hlh-11 0.0910 0.3401 0.3678 0.0772 0.1239 7925
hlh-12 0.3281 0.1094 0.2812 0.0156 0.2656 64
hlh-13 0.1496 0.3079 0.2786 0.0352 0.2287 341
hlh-15 0.1561 0.4015 0.2193 0.0372 0.1859 269
hlh-17 0.1416 0.1159 0.2532 0.3305 0.1588 233
hlh-26 0.1974 0.1842 0.1842 0.1842 0.2500 76
hlh-30 0.0867 0.3642 0.3670 0.0606 0.1214 8822
hlh-4 0.1167 0.3478 0.3227 0.0870 0.1259 437
hlh-6 0.1043 0.2496 0.3122 0.1722 0.1617 1150
hlh-8 0.0908 0.4148 0.3362 0.0402 0.1179 1145
hmbx-1 0.1866 0.3178 0.2478 0.0700 0.1778 343
hmg-1.1 0.0870 0.3688 0.3514 0.0693 0.1235 4414
hmg-11 0.0683 0.4007 0.3521 0.0709 0.1080 4891
hmg-20 0.1749 0.3437 0.2503 0.1005 0.1307 995
hmg-4 0.0841 0.2696 0.3771 0.1215 0.1477 3209
hnd-1 0.1374 0.3661 0.2398 0.0813 0.1753 713
hsf-1 0.1819 0.2716 0.2402 0.1789 0.1274 2935
irx-1 0.0738 0.5066 0.2757 0.0492 0.0946 1585
jun-1 0.0931 0.4384 0.3220 0.0485 0.0980 4478
klf-2 0.1453 0.3062 0.2994 0.0678 0.1812 1032
lag-1 0.1957 0.2267 0.2919 0.1708 0.1149 322
let-526 0.1450 0.3358 0.2992 0.0892 0.1308 1200
let-607 0.1086 0.4335 0.2796 0.0739 0.1044 2625
lim-6 0.0824 0.4821 0.2724 0.0269 0.1362 558
lim-7 0.1713 0.1846 0.2882 0.1608 0.1951 1804
lin-1 0.1310 0.3315 0.3262 0.0581 0.1531 2305
lin-11 0.0788 0.4618 0.2908 0.0535 0.1150 2486
lin-13 0.0873 0.4842 0.2719 0.0514 0.1052 8889
lin-14 0.0873 0.2819 0.4364 0.0425 0.1520 9348
lin-15B 0.0455 0.6361 0.2091 0.0453 0.0639 5007
lin-26 0.1544 0.2033 0.2937 0.1905 0.1581 3187
lin-29 0.1512 0.3466 0.2892 0.0795 0.1336 906
lin-32 0.1178 0.2744 0.3747 0.0489 0.1842 798
lin-38 0.1418 0.3816 0.2192 0.1139 0.1436 5551
lin-39 0.0760 0.3971 0.3505 0.0522 0.1242 5646
lin-40 0.1179 0.3341 0.3365 0.0949 0.1166 5436
lin-54 0.1194 0.4613 0.2160 0.1030 0.1002 3592
lir-1 0.1050 0.4557 0.2622 0.0513 0.1257 1209
lir-3 0.1044 0.4173 0.3125 0.0536 0.1122 2816
lsl-1 0.1066 0.5060 0.1822 0.0721 0.1331 3397
lsy-12 0.1356 0.3382 0.2858 0.1182 0.1222 1718
lsy-2 0.0898 0.4259 0.3158 0.0504 0.1181 31536
lsy-27 0.1797 0.3088 0.2304 0.0599 0.2212 217
mab-5 0.0848 0.3934 0.3457 0.0411 0.1350 2407
mab-9 0.1025 0.4088 0.2996 0.0751 0.1139 1492
madf-10 0.1271 0.3756 0.2988 0.0764 0.1222 2423
madf-2 0.1019 0.4049 0.2976 0.0489 0.1467 736
madf-3 0.1631 0.3024 0.2185 0.2193 0.0967 2741
madf-5 0.1926 0.1895 0.2856 0.1559 0.1765 1989
madf-6 0.1464 0.3763 0.2018 0.1591 0.1164 5060
madf-8 0.1143 0.5195 0.2089 0.0567 0.1007 1977
madf-9 0.1411 0.3274 0.3109 0.0739 0.1466 1637
mbf-1 0.3158 0.2947 0.2737 0.0105 0.1053 95
mcd-1 0.1099 0.4054 0.2489 0.1130 0.1229 4460
mdl-1 0.0821 0.3749 0.3826 0.0449 0.1155 12525
mec-3 0.1441 0.2996 0.2812 0.0934 0.1817 1145
med-1 0.1105 0.3817 0.2729 0.0674 0.1675 579
mef-2 0.0646 0.4346 0.3716 0.0355 0.0937 619
mel-28 0.2263 0.3431 0.2482 0.0949 0.0876 137
mep-1 0.0893 0.4286 0.3160 0.0584 0.1077 13547
mls-2 0.0910 0.3197 0.3745 0.0559 0.1590 1880
mml-1 0.1377 0.2899 0.4058 0.0072 0.1594 138
mxl-1 0.2141 0.1590 0.3394 0.0489 0.2385 327
mxl-2 0.1487 0.2507 0.3439 0.0872 0.1695 1009
mxl-3 0.0931 0.3262 0.3731 0.0808 0.1268 3801
nfya-1 0.0827 0.3614 0.3509 0.0615 0.1435 11520
nfya-2 0.2483 0.1862 0.1885 0.2437 0.1333 435
nfyb-1 0.1433 0.2745 0.2720 0.1537 0.1566 4048
nhr-10 0.1426 0.3589 0.3313 0.0567 0.1104 652
nhr-102 0.1606 0.3223 0.2594 0.1299 0.1279 3581
nhr-11 0.0922 0.3769 0.3529 0.0600 0.1180 4500
nhr-111 0.2165 0.1772 0.2795 0.1496 0.1772 254
nhr-12 0.1402 0.4081 0.3022 0.0343 0.1153 321
nhr-120 0.1918 0.1590 0.2885 0.2082 0.1525 610
nhr-129 0.0790 0.3815 0.3562 0.0657 0.1176 5696
nhr-179 0.2889 0.0741 0.3556 0.1037 0.1778 135
nhr-19 0.1018 0.3945 0.3344 0.0456 0.1237 4560
nhr-2 0.1009 0.3028 0.3993 0.0402 0.1568 1843
nhr-20 0.0868 0.4069 0.3487 0.0496 0.1080 5220
nhr-21 0.1128 0.3663 0.3469 0.0680 0.1061 3148
nhr-23 0.0982 0.3947 0.3272 0.0656 0.1143 4768
nhr-232 0.1217 0.3050 0.3133 0.0667 0.1933 600
nhr-237 0.0820 0.5434 0.2538 0.0462 0.0747 2317
nhr-25 0.1002 0.3612 0.3574 0.0633 0.1179 10374
nhr-270 0.2371 0.2284 0.2371 0.1509 0.1466 232
nhr-28 0.0875 0.3792 0.3547 0.0569 0.1216 7885
nhr-41 0.1602 0.2843 0.3477 0.0458 0.1620 1136
nhr-42 0.1487 0.2990 0.2677 0.1364 0.1481 1789
nhr-43 0.1429 0.3778 0.3020 0.0758 0.1016 1861
nhr-47 0.1001 0.3625 0.3494 0.0667 0.1212 6024
nhr-48 0.1178 0.3278 0.3664 0.0691 0.1189 2852
nhr-6 0.0842 0.4292 0.3294 0.0584 0.0988 3907
nhr-67 0.2154 0.3231 0.2615 0.0462 0.1538 65
nhr-71 0.1029 0.3289 0.3756 0.0612 0.1314 8552
nhr-76 0.1166 0.3745 0.3347 0.0576 0.1166 729
nhr-77 0.0992 0.4546 0.2864 0.0554 0.1043 5666
nhr-80 0.0824 0.3673 0.3273 0.0974 0.1256 10062
nhr-84 0.1679 0.3504 0.1898 0.1679 0.1241 137
nhr-85 0.1006 0.4066 0.3537 0.0370 0.1022 1948
nhr-90 0.1243 0.3557 0.3016 0.0887 0.1297 5342
npax-4 0.1453 0.3599 0.2526 0.0657 0.1765 289
odd-2 0.1303 0.2011 0.3109 0.1451 0.2126 875
pag-3 0.0935 0.3384 0.3697 0.0659 0.1325 1593
pat-9 0.1133 0.3528 0.3188 0.0469 0.1683 618
pax-1 0.0808 0.4802 0.2853 0.0650 0.0887 631
pax-3 0.0942 0.4242 0.3033 0.0595 0.1189 1009
peb-1 0.1377 0.2319 0.4783 0.0290 0.1232 138
pes-1 0.1380 0.2941 0.2806 0.0592 0.2282 1775
pha-2 0.1191 0.3718 0.3014 0.0325 0.1751 554
pha-4 0.0958 0.3868 0.3289 0.0602 0.1283 15004
php-3 0.1189 0.2953 0.3259 0.1101 0.1498 3559
pop-1 0.1647 0.2571 0.3043 0.0535 0.2204 953
pqm-1 0.0791 0.3903 0.3342 0.0728 0.1237 9153
pros-1 0.0712 0.3465 0.4320 0.0427 0.1076 632
rcor-1 0.1358 0.4302 0.2334 0.0778 0.1228 2378
ref-1 0.1837 0.2296 0.3081 0.0415 0.2370 675
ref-2 0.0912 0.2704 0.3195 0.1722 0.1467 4541
repo-1 0.2002 0.2120 0.2120 0.2438 0.1319 1698
rnt-1 0.0817 0.3875 0.3456 0.0641 0.1212 7492
row-1 0.0975 0.4035 0.3326 0.0547 0.1116 1918
saeg-2 0.1438 0.2739 0.3420 0.1041 0.1362 1307
scrt-1 0.1367 0.2460 0.3039 0.1198 0.1937 1244
sdz-12 0.1411 0.1998 0.2609 0.2297 0.1685 801
sdz-38 0.2794 0.1176 0.3676 0.0882 0.1471 68
sea-1 0.1465 0.2706 0.3066 0.0921 0.1841 1249
sea-2 0.1426 0.3005 0.3243 0.0934 0.1392 589
sem-2 0.1477 0.2551 0.3002 0.0918 0.2053 643
sem-4 0.0841 0.3893 0.3742 0.0439 0.1085 2461
skn-1 0.0720 0.5316 0.2687 0.0445 0.0833 4180
sma-3 0.1179 0.3758 0.3152 0.0743 0.1168 5412
sma-4 0.1432 0.2970 0.3194 0.0934 0.1469 1606
sma-9 0.0927 0.3369 0.3753 0.0543 0.1407 7141
snai-1 0.1532 0.3363 0.2402 0.0450 0.2252 333
snpc-4 0.1229 0.3799 0.2848 0.0549 0.1575 20559
snu-23 0.0888 0.3702 0.3710 0.0552 0.1148 8256
somi-1 0.1430 0.2910 0.3843 0.0487 0.1331 1007
sox-2 0.1455 0.3288 0.3485 0.0136 0.1636 660
sox-4 0.0961 0.3974 0.3121 0.0562 0.1382 2134
spr-3 0.1401 0.2934 0.2705 0.1595 0.1366 1135
sptf-1 0.0973 0.3043 0.3213 0.0910 0.1862 4308
sptf-2 0.1472 0.2511 0.2294 0.1688 0.2035 231
sup-37 0.1046 0.3807 0.2876 0.1095 0.1176 612
swsn-7 0.0786 0.4374 0.3332 0.0444 0.1063 4412
syd-9 0.1024 0.3500 0.3341 0.0610 0.1524 820
tab-1 0.1418 0.2444 0.3310 0.0962 0.1867 1559
tag-97 0.1589 0.2617 0.3146 0.1495 0.1153 321
tbx-11 0.1536 0.2831 0.2956 0.0701 0.1977 1042
tbx-2 0.0971 0.3947 0.3404 0.0499 0.1178 9802
tbx-37 0.1220 0.4481 0.2448 0.0461 0.1391 1107
tbx-7 0.0906 0.5563 0.1984 0.0469 0.1078 640
tbx-8 0.1558 0.3149 0.2955 0.0487 0.1851 308
tbx-9 0.2739 0.1826 0.1909 0.1784 0.1743 241
tlp-1 0.1268 0.3099 0.3944 0.0563 0.1127 142
tra-1 0.1234 0.2674 0.3649 0.0887 0.1556 3168
tra-4 0.1901 0.3099 0.2479 0.0868 0.1653 242
ttx-3 0.1195 0.4166 0.2450 0.0627 0.1562 845
unc-120 0.0787 0.3517 0.4005 0.0466 0.1225 2809
unc-130 0.0915 0.5144 0.2361 0.0618 0.0962 4821
unc-3 0.1275 0.3807 0.2782 0.0293 0.1843 1161
unc-30 0.1327 0.2755 0.3571 0.1327 0.1020 98
unc-39 0.1676 0.2676 0.3882 0.0529 0.1235 340
unc-42 0.0784 0.3299 0.3947 0.0432 0.1537 3610
unc-55 0.0771 0.4062 0.3503 0.0460 0.1205 6241
unc-62 0.1051 0.2847 0.4134 0.0450 0.1517 3776
unc-86 0.0883 0.4568 0.3027 0.0336 0.1186 3069
vab-15 0.0695 0.4421 0.2848 0.0828 0.1209 604
vab-7 0.1377 0.2920 0.3041 0.0871 0.1791 1815
xbp-1 0.0677 0.5372 0.2611 0.0459 0.0881 2941
zag-1 0.0847 0.3889 0.3858 0.0398 0.1007 1936
zfh-2 0.0929 0.1444 0.2875 0.3492 0.1260 7085
zfp-2 0.1074 0.4559 0.2574 0.0603 0.1191 680
zim-3 0.1579 0.1600 0.2519 0.2546 0.1756 1862
zip-11 0.2245 0.2128 0.3003 0.0729 0.1895 343
zip-2 0.1417 0.4251 0.2793 0.0616 0.0924 487
zip-4 0.0950 0.4377 0.2624 0.0933 0.1116 1147
zip-5 0.0996 0.5480 0.1904 0.0356 0.1263 562
zip-8 0.1291 0.1528 0.3641 0.1261 0.2279 1689
znf-207 0.2144 0.2822 0.2642 0.1217 0.1176 723
ztf-1 0.1387 0.2101 0.2395 0.2689 0.1429 238
ztf-11 0.1009 0.4514 0.3032 0.0395 0.1051 1646
ztf-16 0.1033 0.4674 0.2409 0.0507 0.1377 552
ztf-18 0.1006 0.4273 0.2281 0.1067 0.1373 2455
ztf-22 0.1514 0.2945 0.3444 0.0782 0.1314 601
ztf-23 0.1217 0.3432 0.2922 0.0803 0.1626 2392
ztf-25 0.1776 0.2186 0.2690 0.1535 0.1813 1368
ztf-26 0.1482 0.3093 0.3256 0.0891 0.1277 1167
ztf-28 0.1354 0.3650 0.2533 0.1108 0.1354 1137
ztf-29 0.1203 0.2837 0.3438 0.0449 0.2074 1114
ztf-3 0.1647 0.2851 0.3574 0.0723 0.1205 249
ztf-4 0.1227 0.3842 0.3122 0.0720 0.1089 3488
ztf-6 0.1421 0.3504 0.3041 0.0612 0.1421 605
ztf-7 0.1042 0.4487 0.2797 0.0508 0.1167 2006
Total 0.1053 0.3727 0.3128 0.0797 0.1294 900852

## Sheet: s7.Worm_peaks_non-HOT
TF	3P	5P<=500	5P>500	Exon	Intron	Total
B0261.1	233	106	433	103	241	1116
B0310.2	17	4	19	14	24	78
C04F5.9	6	69	22	19	15	131
C16A3.4	32	326	142	41	32	573
C34B4.2	1	2	11	11	0	25
C38D4.7	12	11	21	4	8	56
D1046.2	145	68	247	237	166	863
D2030.7	332	598	427	188	248	1793
F10B5.3	30	15	19	24	15	103
F10E7.11	20	10	7	21	9	67
F22D6.2	15	14	22	19	11	81
F23B12.7	49	297	112	45	58	561
F26F4.8	104	58	180	121	137	600
F33H1.4	307	753	447	161	277	1945
F37B4.10	99	44	148	168	110	569
F39B2.1	99	47	58	84	45	333
F44E2.7	89	48	148	106	81	472
F52B5.7	98	63	77	227	59	524
F57C9.4	5	6	5	9	10	35
K09A11.1	14	14	37	3	19	87
K11D2.4	92	91	169	102	86	540
K12H6.12	23	39	108	10	29	209
M03D4.4	45	90	131	37	79	382
R02D3.7	43	290	73	57	45	508
T07F8.4	15	10	15	17	13	70
T20F7.1	225	637	444	201	249	1756
T22C8.4	229	279	357	188	453	1506
T23F11.4	11	12	28	10	9	70
Y105C5A.15	122	58	110	101	84	475
Y22D7AL.16	8	5	17	4	8	42
Y48G9A.11	232	326	299	229	229	1315
Y53G8AR.9	337	252	253	452	175	1469
Y55F3AM.14	28	31	78	30	35	202
Y56A3A.18	216	107	183	238	119	863
Y5F2A.4	15	11	7	20	7	60
Y67H2A.10	21	40	37	12	12	122
Y75B8A.6	83	46	87	79	67	362
Y79H2A.3	171	110	95	124	56	556
Y95B8A.8	174	195	157	180	89	795
ZK185.1	65	60	72	59	59	315
ZK337.2	43	49	115	62	64	333
ZK546.5	10	22	7	8	10	57
aha-1	1	18	31	10	18	78
ahr-1	3	6	6	2	12	29
alr-1	116	106	337	426	249	1234
aptf-2	52	112	122	54	50	390
aptf-3	89	56	129	93	62	429
arid-1	204	148	205	159	129	845
atf-7	77	119	152	95	79	522
athp-1	83	79	34	86	26	308
attf-3	99	303	123	75	96	696
attf-4	0	2	3	1	2	8
attf-5	55	279	155	67	51	607
attf-6	403	229	462	251	237	1582
bcl-11	184	556	879	98	245	1962
bed-1	65	27	89	89	58	328
bed-2	20	29	39	31	31	150
bed-3	14	6	13	6	16	55
blmp-1	639	1876	2921	413	953	6802
cebp-1	549	1241	1334	538	665	4327
cebp-2	174	90	222	250	124	860
ceh-100	149	200	138	96	92	675
ceh-13	2	3	7	3	10	25
ceh-14	31	78	140	13	45	307
ceh-16	53	85	250	31	73	492
ceh-18	83	252	516	68	133	1052
ceh-19	17	24	79	11	26	157
ceh-2	14	83	66	14	25	202
ceh-20	119	193	450	90	176	1028
ceh-22	6	3	27	3	6	45
ceh-24	1	0	1	2	3	7
ceh-27	55	108	234	81	78	556
ceh-30	1	15	11	1	7	35
ceh-31	99	334	480	62	186	1161
ceh-32	4	2	4	0	3	13
ceh-34	57	119	288	37	105	606
ceh-36	149	134	392	83	402	1160
ceh-37	39	37	71	31	48	226
ceh-38	399	503	613	223	798	2536
ceh-39	59	368	230	90	77	824
ceh-40	80	38	98	77	54	347
ceh-43	27	30	79	8	49	193
ceh-44	57	46	103	24	68	298
ceh-45	23	15	40	26	41	145
ceh-48	87	279	217	103	226	912
ceh-5	116	190	304	87	143	840
ceh-51	76	74	122	11	67	350
ceh-58	114	36	121	142	64	477
ceh-6	17	13	44	17	36	127
ceh-62	0	0	1	0	0	1
ceh-63	117	96	369	384	237	1203
ceh-79	16	9	4	15	7	51
ceh-8	53	80	224	87	76	520
ceh-82	132	922	727	113	209	2103
ceh-83	1011	1007	2289	1543	1857	7707
ceh-88	34	40	75	34	45	228
ceh-9	4	1	10	9	2	26
ceh-90	7	123	55	27	40	252
ceh-91	138	398	202	56	106	900
ces-1	609	1266	2582	335	1151	5943
che-1	17	12	25	11	16	81
cnd-1	75	133	265	42	114	629
cog-1	16	62	92	4	39	213
crh-2	256	1039	1010	195	382	2882
ctbp-1	182	200	491	139	216	1228
daf-12	3	0	1	1	2	7
daf-16	563	1762	1950	478	773	5526
daf-19	67	45	112	97	69	390
daf-8	15	6	18	16	20	75
die-1	76	50	96	57	56	335
dmd-4	231	350	550	619	575	2325
dmd-6	439	1549	1823	462	714	4987
dmd-8	154	82	252	221	161	870
dmd-9	73	58	143	96	82	452
dox-1	273	652	693	435	357	2410
dpff-1	12	12	7	21	9	61
dpl-1	453	4364	1779	470	613	7679
drap-1	47	103	213	72	100	535
dsc-1	303	503	1222	206	430	2664
duxl-1	73	63	76	75	63	350
dve-1	498	1604	1749	421	803	5075
efl-1	1014	5956	2754	902	1115	11741
efl-3	4	2	10	5	7	28
egl-13	34	48	158	12	62	314
egl-18	52	25	79	65	31	252
egl-27	78	145	284	36	97	640
egl-43	251	215	584	516	325	1891
egl-44	107	83	161	111	85	547
egl-5	66	188	338	49	125	766
egrh-3	297	211	627	735	267	2137
ekl-4	298	289	286	341	184	1398
elt-1	198	394	935	148	313	1988
elt-2	916	3584	3386	1050	1401	10337
elt-3	605	1498	2326	393	800	5622
elt-4	15	11	47	114	26	213
eor-1	15	25	62	7	29	138
ets-4	40	171	145	59	55	470
ets-5	18	22	37	58	32	167
ets-7	15	18	42	9	19	103
eyg-1	4	10	13	3	4	34
fax-1	9	31	30	4	14	88
fkh-10	236	339	1132	147	465	2319
fkh-2	0	3	11	0	1	15
fkh-3	17	6	12	35	11	81
fkh-4	26	43	95	21	41	226
fkh-6	6	18	36	17	9	86
fkh-7	28	59	92	18	45	242
fkh-8	157	372	764	95	222	1610
flh-1	2	2	10	4	2	20
fos-1	373	1849	1790	377	625	5014
gei-17	28	28	30	36	29	151
gei-8	69	39	79	66	50	303
gmeb-1	165	911	586	185	235	2082
gmeb-2	10	11	25	7	17	70
grh-1	115	242	394	115	161	1027
ham-2	78	158	429	48	173	886
hif-1	150	448	528	121	184	1431
hlh-1	101	300	589	79	193	1262
hlh-11	475	1577	2049	471	703	5275
hlh-12	1	0	1	0	3	5
hlh-13	4	5	9	6	12	36
hlh-15	1	1	4	0	1	7
hlh-17	27	19	54	65	34	199
hlh-26	2	4	2	11	3	22
hlh-30	470	1534	2071	402	679	5156
hlh-4	30	70	98	27	36	261
hlh-6	51	69	137	165	76	498
hlh-8	28	82	130	20	37	297
hmbx-1	8	5	4	5	5	27
hmg-1.1	186	547	809	196	290	2028
hmg-11	177	838	971	196	300	2482
hmg-20	59	20	67	54	32	232
hmg-4	173	294	706	259	292	1724
hnd-1	23	25	17	11	21	97
hsf-1	405	376	483	449	265	1978
irx-1	20	92	86	5	37	240
2024-06-01	126	368	379	90	137	1100
klf-2	75	52	147	51	84	409
lag-1	27	11	42	41	17	138
let-526	55	53	90	64	50	312
let-607	87	322	247	90	114	860
lim-6	9	23	40	3	21	96
lim-7	190	94	290	234	209	1017
lin-1	132	270	325	85	165	977
lin-11	42	175	200	55	62	534
lin-13	288	883	797	181	389	2538
lin-14	632	1587	3263	292	1159	6933
lin-15B	55	1088	362	108	121	1734
lin-26	330	247	504	489	297	1867
lin-29	35	26	62	33	30	186
lin-32	41	63	149	25	63	341
lin-38	581	1040	700	529	588	3438
lin-39	202	599	1115	145	427	2488
lin-40	351	598	897	321	324	2491
lin-54	259	674	306	266	168	1673
lir-1	31	69	47	18	26	191
lir-3	80	283	309	84	105	861
lsl-1	264	968	423	151	331	2137
lsy-12	91	68	101	96	60	416
lsy-2	1689	6119	5855	998	2410	17071
lsy-27	5	2	4	3	3	17
mab-5	87	145	431	34	205	902
mab-9	58	54	158	60	74	404
madf-10	109	153	179	91	93	625
madf-2	10	15	19	10	12	66
madf-3	315	342	346	518	171	1692
madf-5	183	74	255	230	164	906
madf-6	587	1089	707	691	436	3510
madf-8	161	555	284	69	134	1203
madf-9	74	68	158	73	84	457
mbf-1	5	0	2	0	3	10
mcd-1	291	717	527	386	337	2258
mdl-1	422	1523	2005	268	619	4837
mec-3	72	47	129	85	87	420
med-1	8	25	39	14	18	104
mef-2	7	12	34	3	12	68
mel-28	4	5	2	4	1	16
mep-1	694	2437	2392	510	861	6894
mls-2	75	120	321	42	143	701
mml-1	8	6	15	1	4	34
mxl-1	11	8	21	6	13	59
mxl-2	63	47	125	65	62	362
mxl-3	200	567	826	222	284	2099
nfya-1	622	2012	2739	547	1209	7129
nfya-2	68	22	43	86	32	251
nfyb-1	373	365	567	504	409	2218
nhr-10	12	21	16	9	12	70
nhr-102	327	352	348	317	254	1598
nhr-11	179	334	678	150	263	1604
nhr-111	13	3	7	16	10	49
nhr-12	2	6	2	4	4	18
nhr-120	56	32	88	102	44	322
nhr-129	247	1028	1272	252	421	3220
nhr-179	3	0	5	7	4	19
nhr-19	260	657	822	120	324	2183
nhr-2	148	226	546	52	232	1204
nhr-20	245	955	1086	154	322	2762
nhr-21	187	296	529	119	163	1294
nhr-23	308	801	992	231	376	2708
nhr-232	8	19	33	11	8	79
nhr-237	24	79	69	20	19	211
nhr-25	626	1366	2301	435	805	5533
nhr-270	12	7	4	18	5	46
nhr-28	446	1832	1993	354	712	5337
nhr-41	68	91	145	28	68	400
nhr-42	122	83	179	180	131	695
nhr-43	120	147	221	71	75	634
nhr-47	366	919	1256	266	460	3267
nhr-48	140	314	460	109	156	1179
nhr-6	112	302	510	99	158	1181
nhr-67	0	0	1	1	0	2
nhr-71	604	1512	2283	368	816	5583
nhr-76	14	30	48	14	17	123
nhr-77	213	683	609	154	243	1902
nhr-80	567	2445	2404	798	981	7195
nhr-84	3	7	9	12	11	42
nhr-85	105	196	348	33	106	788
nhr-90	272	487	570	277	298	1904
npax-4	2	1	3	0	0	6
odd-2	74	85	196	105	128	588
pag-3	73	213	348	61	121	816
pat-9	9	21	36	4	15	85
pax-1	24	47	70	14	25	180
pax-3	38	57	112	17	60	284
peb-1	8	7	30	2	8	55
pes-1	149	118	271	66	261	865
pha-2	12	16	34	0	16	78
pha-4	903	2702	3172	645	1341	8763
php-3	254	598	767	313	361	2293
pop-1	86	82	150	36	124	478
pqm-1	459	2315	2116	521	855	6266
pros-1	3	22	54	6	8	93
rcor-1	158	280	176	116	117	847
ref-1	53	21	74	21	59	228
ref-2	284	466	932	672	481	2835
repo-1	177	85	129	317	125	833
rnt-1	333	1202	1496	327	536	3894
row-1	48	72	152	25	53	350
saeg-2	66	61	124	94	67	412
scrt-1	84	73	192	118	112	579
sdz-12	43	42	92	137	70	384
sdz-38	2	0	13	4	2	21
sea-1	90	59	167	78	107	501
sea-2	36	21	52	33	27	169
sem-2	23	13	47	33	30	146
sem-4	92	196	412	44	133	877
skn-1	84	629	366	79	107	1265
sma-3	322	666	839	255	327	2409
sma-4	102	167	221	104	121	715
sma-9	453	1362	1912	298	733	4758
snai-1	6	7	14	2	17	46
snpc-4	1503	2011	2834	573	2007	8928
snu-23	468	1692	2120	327	636	5243
somi-1	26	32	82	15	23	178
sox-2	31	36	88	0	29	184
sox-4	59	91	229	37	106	522
spr-3	55	42	50	110	52	309
sptf-1	295	505	866	282	611	2559
sptf-2	3	9	8	26	9	55
sup-37	6	12	31	23	15	87
swsn-7	143	699	716	108	213	1879
syd-9	10	29	42	20	20	121
tab-1	131	113	285	127	159	815
tag-97	21	11	43	38	21	134
tbx-11	83	51	121	48	89	392
tbx-2	439	1151	1531	248	580	3949
tbx-37	55	75	92	28	42	292
tbx-7	10	46	15	9	20	100
tbx-8	2	4	8	3	5	22
tbx-9	16	9	11	20	5	61
tlp-1	10	39	43	7	14	113
tra-1	210	334	643	211	295	1693
tra-4	4	2	4	5	2	17
ttx-3	22	32	43	10	33	140
unc-120	99	329	571	66	168	1233
unc-130	186	707	477	155	185	1710
unc-3	30	22	68	6	57	183
unc-30	1	1	10	3	5	20
unc-39	5	5	19	7	9	45
unc-42	197	444	996	86	435	2158
unc-55	331	1343	1561	214	545	3994
unc-62	209	317	802	74	345	1747
unc-86	99	235	374	35	164	907
vab-15	14	34	61	17	27	153
vab-7	112	72	229	95	162	670
xbp-1	42	424	217	52	69	804
zag-1	43	87	222	18	63	433
zfh-2	552	555	1531	2318	729	5685
zfp-2	4	5	7	4	7	27
zim-3	165	92	245	405	205	1112
zip-11	21	6	23	13	12	75
zip-2	10	47	26	9	11	103
zip-4	23	85	58	42	46	254
zip-5	10	40	14	5	17	86
zip-8	209	215	561	202	374	1561
znf-207	40	21	14	30	10	115
ztf-1	13	9	24	41	18	105
ztf-11	34	43	84	13	45	219
ztf-16	2	6	8	3	2	21
ztf-18	100	230	153	91	119	693
ztf-22	17	44	53	26	30	170
ztf-23	171	186	363	133	234	1087
ztf-25	152	90	206	170	144	762
ztf-26	28	36	76	53	37	230
ztf-28	75	103	141	96	78	493
ztf-29	57	72	179	30	120	458
ztf-3	3	2	4	4	6	19
ztf-4	149	166	227	114	128	784
ztf-6	25	15	39	20	17	116
ztf-7	72	272	208	49	92	693
Total	49805	120171	146851	48347	65863	431037

## Sheet: s8.Worm_peaks_non-HOT_fraction
TF 3P 5P<=500 5P>500 Exon Intron Total
B0261.1 0.2088 0.0950 0.3880 0.0923 0.2159 1116
B0310.2 0.2179 0.0513 0.2436 0.1795 0.3077 78
C04F5.9 0.0458 0.5267 0.1679 0.1450 0.1145 131
C16A3.4 0.0558 0.5689 0.2478 0.0716 0.0558 573
C34B4.2 0.0400 0.0800 0.4400 0.4400 0.0000 25
C38D4.7 0.2143 0.1964 0.3750 0.0714 0.1429 56
D1046.2 0.1680 0.0788 0.2862 0.2746 0.1924 863
D2030.7 0.1852 0.3335 0.2381 0.1049 0.1383 1793
F10B5.3 0.2913 0.1456 0.1845 0.2330 0.1456 103
F10E7.11 0.2985 0.1493 0.1045 0.3134 0.1343 67
F22D6.2 0.1852 0.1728 0.2716 0.2346 0.1358 81
F23B12.7 0.0873 0.5294 0.1996 0.0802 0.1034 561
F26F4.8 0.1733 0.0967 0.3000 0.2017 0.2283 600
F33H1.4 0.1578 0.3871 0.2298 0.0828 0.1424 1945
F37B4.10 0.1740 0.0773 0.2601 0.2953 0.1933 569
F39B2.1 0.2973 0.1411 0.1742 0.2523 0.1351 333
F44E2.7 0.1886 0.1017 0.3136 0.2246 0.1716 472
F52B5.7 0.1870 0.1202 0.1469 0.4332 0.1126 524
F57C9.4 0.1429 0.1714 0.1429 0.2571 0.2857 35
K09A11.1 0.1609 0.1609 0.4253 0.0345 0.2184 87
K11D2.4 0.1704 0.1685 0.3130 0.1889 0.1593 540
K12H6.12 0.1100 0.1866 0.5167 0.0478 0.1388 209
M03D4.4 0.1178 0.2356 0.3429 0.0969 0.2068 382
R02D3.7 0.0846 0.5709 0.1437 0.1122 0.0886 508
T07F8.4 0.2143 0.1429 0.2143 0.2429 0.1857 70
T20F7.1 0.1281 0.3628 0.2528 0.1145 0.1418 1756
T22C8.4 0.1521 0.1853 0.2371 0.1248 0.3008 1506
T23F11.4 0.1571 0.1714 0.4000 0.1429 0.1286 70
Y105C5A.15 0.2568 0.1221 0.2316 0.2126 0.1768 475
Y22D7AL.16 0.1905 0.1190 0.4048 0.0952 0.1905 42
Y48G9A.11 0.1764 0.2479 0.2274 0.1741 0.1741 1315
Y53G8AR.9 0.2294 0.1715 0.1722 0.3077 0.1191 1469
Y55F3AM.14 0.1386 0.1535 0.3861 0.1485 0.1733 202
Y56A3A.18 0.2503 0.1240 0.2121 0.2758 0.1379 863
Y5F2A.4 0.2500 0.1833 0.1167 0.3333 0.1167 60
Y67H2A.10 0.1721 0.3279 0.3033 0.0984 0.0984 122
Y75B8A.6 0.2293 0.1271 0.2403 0.2182 0.1851 362
Y79H2A.3 0.3076 0.1978 0.1709 0.2230 0.1007 556
Y95B8A.8 0.2189 0.2453 0.1975 0.2264 0.1119 795
ZK185.1 0.2063 0.1905 0.2286 0.1873 0.1873 315
ZK337.2 0.1291 0.1471 0.3453 0.1862 0.1922 333
ZK546.5 0.1754 0.3860 0.1228 0.1404 0.1754 57
aha-1 0.0128 0.2308 0.3974 0.1282 0.2308 78
ahr-1 0.1034 0.2069 0.2069 0.0690 0.4138 29
alr-1 0.0940 0.0859 0.2731 0.3452 0.2018 1234
aptf-2 0.1333 0.2872 0.3128 0.1385 0.1282 390
aptf-3 0.2075 0.1305 0.3007 0.2168 0.1445 429
arid-1 0.2414 0.1751 0.2426 0.1882 0.1527 845
atf-7 0.1475 0.2280 0.2912 0.1820 0.1513 522
athp-1 0.2695 0.2565 0.1104 0.2792 0.0844 308
attf-3 0.1422 0.4353 0.1767 0.1078 0.1379 696
attf-4 0.0000 0.2500 0.3750 0.1250 0.2500 8
attf-5 0.0906 0.4596 0.2554 0.1104 0.0840 607
attf-6 0.2547 0.1448 0.2920 0.1587 0.1498 1582
bcl-11 0.0938 0.2834 0.4480 0.0499 0.1249 1962
bed-1 0.1982 0.0823 0.2713 0.2713 0.1768 328
bed-2 0.1333 0.1933 0.2600 0.2067 0.2067 150
bed-3 0.2545 0.1091 0.2364 0.1091 0.2909 55
blmp-1 0.0939 0.2758 0.4294 0.0607 0.1401 6802
cebp-1 0.1269 0.2868 0.3083 0.1243 0.1537 4327
cebp-2 0.2023 0.1047 0.2581 0.2907 0.1442 860
ceh-100 0.2207 0.2963 0.2044 0.1422 0.1363 675
ceh-13 0.0800 0.1200 0.2800 0.1200 0.4000 25
ceh-14 0.1010 0.2541 0.4560 0.0423 0.1466 307
ceh-16 0.1077 0.1728 0.5081 0.0630 0.1484 492
ceh-18 0.0789 0.2395 0.4905 0.0646 0.1264 1052
ceh-19 0.1083 0.1529 0.5032 0.0701 0.1656 157
ceh-2 0.0693 0.4109 0.3267 0.0693 0.1238 202
ceh-20 0.1158 0.1877 0.4377 0.0875 0.1712 1028
ceh-22 0.1333 0.0667 0.6000 0.0667 0.1333 45
ceh-24 0.1429 0.0000 0.1429 0.2857 0.4286 7
ceh-27 0.0989 0.1942 0.4209 0.1457 0.1403 556
ceh-30 0.0286 0.4286 0.3143 0.0286 0.2000 35
ceh-31 0.0853 0.2877 0.4134 0.0534 0.1602 1161
ceh-32 0.3077 0.1538 0.3077 0.0000 0.2308 13
ceh-34 0.0941 0.1964 0.4752 0.0611 0.1733 606
ceh-36 0.1284 0.1155 0.3379 0.0716 0.3466 1160
ceh-37 0.1726 0.1637 0.3142 0.1372 0.2124 226
ceh-38 0.1573 0.1983 0.2417 0.0879 0.3147 2536
ceh-39 0.0716 0.4466 0.2791 0.1092 0.0934 824
ceh-40 0.2305 0.1095 0.2824 0.2219 0.1556 347
ceh-43 0.1399 0.1554 0.4093 0.0415 0.2539 193
ceh-44 0.1913 0.1544 0.3456 0.0805 0.2282 298
ceh-45 0.1586 0.1034 0.2759 0.1793 0.2828 145
ceh-48 0.0954 0.3059 0.2379 0.1129 0.2478 912
ceh-5 0.1381 0.2262 0.3619 0.1036 0.1702 840
ceh-51 0.2171 0.2114 0.3486 0.0314 0.1914 350
ceh-58 0.2390 0.0755 0.2537 0.2977 0.1342 477
ceh-6 0.1339 0.1024 0.3465 0.1339 0.2835 127
ceh-62 0.0000 0.0000 1.0000 0.0000 0.0000 1
ceh-63 0.0973 0.0798 0.3067 0.3192 0.1970 1203
ceh-79 0.3137 0.1765 0.0784 0.2941 0.1373 51
ceh-8 0.1019 0.1538 0.4308 0.1673 0.1462 520
ceh-82 0.0628 0.4384 0.3457 0.0537 0.0994 2103
ceh-83 0.1312 0.1307 0.2970 0.2002 0.2409 7707
ceh-88 0.1491 0.1754 0.3289 0.1491 0.1974 228
ceh-9 0.1538 0.0385 0.3846 0.3462 0.0769 26
ceh-90 0.0278 0.4881 0.2183 0.1071 0.1587 252
ceh-91 0.1533 0.4422 0.2244 0.0622 0.1178 900
ces-1 0.1025 0.2130 0.4345 0.0564 0.1937 5943
che-1 0.2099 0.1481 0.3086 0.1358 0.1975 81
cnd-1 0.1192 0.2114 0.4213 0.0668 0.1812 629
cog-1 0.0751 0.2911 0.4319 0.0188 0.1831 213
crh-2 0.0888 0.3605 0.3505 0.0677 0.1325 2882
ctbp-1 0.1482 0.1629 0.3998 0.1132 0.1759 1228
daf-12 0.4286 0.0000 0.1429 0.1429 0.2857 7
daf-16 0.1019 0.3189 0.3529 0.0865 0.1399 5526
daf-19 0.1718 0.1154 0.2872 0.2487 0.1769 390
daf-8 0.2000 0.0800 0.2400 0.2133 0.2667 75
die-1 0.2269 0.1493 0.2866 0.1701 0.1672 335
dmd-4 0.0994 0.1505 0.2366 0.2662 0.2473 2325
dmd-6 0.0880 0.3106 0.3656 0.0926 0.1432 4987
dmd-8 0.1770 0.0943 0.2897 0.2540 0.1851 870
dmd-9 0.1615 0.1283 0.3164 0.2124 0.1814 452
dox-1 0.1133 0.2705 0.2876 0.1805 0.1481 2410
dpff-1 0.1967 0.1967 0.1148 0.3443 0.1475 61
dpl-1 0.0590 0.5683 0.2317 0.0612 0.0798 7679
drap-1 0.0879 0.1925 0.3981 0.1346 0.1869 535
dsc-1 0.1137 0.1888 0.4587 0.0773 0.1614 2664
duxl-1 0.2086 0.1800 0.2171 0.2143 0.1800 350
dve-1 0.0981 0.3161 0.3446 0.0830 0.1582 5075
efl-1 0.0864 0.5073 0.2346 0.0768 0.0950 11741
efl-3 0.1429 0.0714 0.3571 0.1786 0.2500 28
egl-13 0.1083 0.1529 0.5032 0.0382 0.1975 314
egl-18 0.2063 0.0992 0.3135 0.2579 0.1230 252
egl-27 0.1219 0.2266 0.4437 0.0563 0.1516 640
egl-43 0.1327 0.1137 0.3088 0.2729 0.1719 1891
egl-44 0.1956 0.1517 0.2943 0.2029 0.1554 547
egl-5 0.0862 0.2454 0.4413 0.0640 0.1632 766
egrh-3 0.1390 0.0987 0.2934 0.3439 0.1249 2137
ekl-4 0.2132 0.2067 0.2046 0.2439 0.1316 1398
elt-1 0.0996 0.1982 0.4703 0.0744 0.1574 1988
elt-2 0.0886 0.3467 0.3276 0.1016 0.1355 10337
elt-3 0.1076 0.2665 0.4137 0.0699 0.1423 5622
elt-4 0.0704 0.0516 0.2207 0.5352 0.1221 213
eor-1 0.1087 0.1812 0.4493 0.0507 0.2101 138
ets-4 0.0851 0.3638 0.3085 0.1255 0.1170 470
ets-5 0.1078 0.1317 0.2216 0.3473 0.1916 167
ets-7 0.1456 0.1748 0.4078 0.0874 0.1845 103
eyg-1 0.1176 0.2941 0.3824 0.0882 0.1176 34
fax-1 0.1023 0.3523 0.3409 0.0455 0.1591 88
fkh-10 0.1018 0.1462 0.4881 0.0634 0.2005 2319
fkh-2 0.0000 0.2000 0.7333 0.0000 0.0667 15
fkh-3 0.2099 0.0741 0.1481 0.4321 0.1358 81
fkh-4 0.1150 0.1903 0.4204 0.0929 0.1814 226
fkh-6 0.0698 0.2093 0.4186 0.1977 0.1047 86
fkh-7 0.1157 0.2438 0.3802 0.0744 0.1860 242
fkh-8 0.0975 0.2311 0.4745 0.0590 0.1379 1610
flh-1 0.1000 0.1000 0.5000 0.2000 0.1000 20
fos-1 0.0744 0.3688 0.3570 0.0752 0.1247 5014
gei-17 0.1854 0.1854 0.1987 0.2384 0.1921 151
gei-8 0.2277 0.1287 0.2607 0.2178 0.1650 303
gmeb-1 0.0793 0.4376 0.2815 0.0889 0.1129 2082
gmeb-2 0.1429 0.1571 0.3571 0.1000 0.2429 70
grh-1 0.1120 0.2356 0.3836 0.1120 0.1568 1027
ham-2 0.0880 0.1783 0.4842 0.0542 0.1953 886
hif-1 0.1048 0.3131 0.3690 0.0846 0.1286 1431
hlh-1 0.0800 0.2377 0.4667 0.0626 0.1529 1262
hlh-11 0.0900 0.2990 0.3884 0.0893 0.1333 5275
hlh-12 0.2000 0.0000 0.2000 0.0000 0.6000 5
hlh-13 0.1111 0.1389 0.2500 0.1667 0.3333 36
hlh-15 0.1429 0.1429 0.5714 0.0000 0.1429 7
hlh-17 0.1357 0.0955 0.2714 0.3266 0.1709 199
hlh-26 0.0909 0.1818 0.0909 0.5000 0.1364 22
hlh-30 0.0912 0.2975 0.4017 0.0780 0.1317 5156
hlh-4 0.1149 0.2682 0.3755 0.1034 0.1379 261
hlh-6 0.1024 0.1386 0.2751 0.3313 0.1526 498
hlh-8 0.0943 0.2761 0.4377 0.0673 0.1246 297
hmbx-1 0.2963 0.1852 0.1481 0.1852 0.1852 27
hmg-1.1 0.0917 0.2697 0.3989 0.0966 0.1430 2028
hmg-11 0.0713 0.3376 0.3912 0.0790 0.1209 2482
hmg-20 0.2543 0.0862 0.2888 0.2328 0.1379 232
hmg-4 0.1003 0.1705 0.4095 0.1502 0.1694 1724
hnd-1 0.2371 0.2577 0.1753 0.1134 0.2165 97
hsf-1 0.2048 0.1901 0.2442 0.2270 0.1340 1978
irx-1 0.0833 0.3833 0.3583 0.0208 0.1542 240
jun-1 0.1145 0.3345 0.3445 0.0818 0.1245 1100
klf-2 0.1834 0.1271 0.3594 0.1247 0.2054 409
lag-1 0.1957 0.0797 0.3043 0.2971 0.1232 138
let-526 0.1763 0.1699 0.2885 0.2051 0.1603 312
let-607 0.1012 0.3744 0.2872 0.1047 0.1326 860
lim-6 0.0938 0.2396 0.4167 0.0312 0.2188 96
lim-7 0.1868 0.0924 0.2852 0.2301 0.2055 1017
lin-1 0.1351 0.2764 0.3327 0.0870 0.1689 977
lin-11 0.0787 0.3277 0.3745 0.1030 0.1161 534
lin-13 0.1135 0.3479 0.3140 0.0713 0.1533 2538
lin-14 0.0912 0.2289 0.4706 0.0421 0.1672 6933
lin-15B 0.0317 0.6275 0.2088 0.0623 0.0698 1734
lin-26 0.1768 0.1323 0.2700 0.2619 0.1591 1867
lin-29 0.1882 0.1398 0.3333 0.1774 0.1613 186
lin-32 0.1202 0.1848 0.4370 0.0733 0.1848 341
lin-38 0.1690 0.3025 0.2036 0.1539 0.1710 3438
lin-39 0.0812 0.2408 0.4482 0.0583 0.1716 2488
lin-40 0.1409 0.2401 0.3601 0.1289 0.1301 2491
lin-54 0.1548 0.4029 0.1829 0.1590 0.1004 1673
lir-1 0.1623 0.3613 0.2461 0.0942 0.1361 191
lir-3 0.0929 0.3287 0.3589 0.0976 0.1220 861
lsl-1 0.1235 0.4530 0.1979 0.0707 0.1549 2137
lsy-12 0.2188 0.1635 0.2428 0.2308 0.1442 416
lsy-2 0.0989 0.3584 0.3430 0.0585 0.1412 17071
lsy-27 0.2941 0.1176 0.2353 0.1765 0.1765 17
mab-5 0.0965 0.1608 0.4778 0.0377 0.2273 902
mab-9 0.1436 0.1337 0.3911 0.1485 0.1832 404
madf-10 0.1744 0.2448 0.2864 0.1456 0.1488 625
madf-2 0.1515 0.2273 0.2879 0.1515 0.1818 66
madf-3 0.1862 0.2021 0.2045 0.3061 0.1011 1692
madf-5 0.2020 0.0817 0.2815 0.2539 0.1810 906
madf-6 0.1672 0.3103 0.2014 0.1969 0.1242 3510
madf-8 0.1338 0.4613 0.2361 0.0574 0.1114 1203
madf-9 0.1619 0.1488 0.3457 0.1597 0.1838 457
mbf-1 0.5000 0.0000 0.2000 0.0000 0.3000 10
mcd-1 0.1289 0.3175 0.2334 0.1709 0.1492 2258
mdl-1 0.0872 0.3149 0.4145 0.0554 0.1280 4837
mec-3 0.1714 0.1119 0.3071 0.2024 0.2071 420
med-1 0.0769 0.2404 0.3750 0.1346 0.1731 104
mef-2 0.1029 0.1765 0.5000 0.0441 0.1765 68
mel-28 0.2500 0.3125 0.1250 0.2500 0.0625 16
mep-1 0.1007 0.3535 0.3470 0.0740 0.1249 6894
mls-2 0.1070 0.1712 0.4579 0.0599 0.2040 701
mml-1 0.2353 0.1765 0.4412 0.0294 0.1176 34
mxl-1 0.1864 0.1356 0.3559 0.1017 0.2203 59
mxl-2 0.1740 0.1298 0.3453 0.1796 0.1713 362
mxl-3 0.0953 0.2701 0.3935 0.1058 0.1353 2099
nfya-1 0.0872 0.2822 0.3842 0.0767 0.1696 7129
nfya-2 0.2709 0.0876 0.1713 0.3426 0.1275 251
nfyb-1 0.1682 0.1646 0.2556 0.2272 0.1844 2218
nhr-10 0.1714 0.3000 0.2286 0.1286 0.1714 70
nhr-102 0.2046 0.2203 0.2178 0.1984 0.1589 1598
nhr-11 0.1116 0.2082 0.4227 0.0935 0.1640 1604
nhr-111 0.2653 0.0612 0.1429 0.3265 0.2041 49
nhr-12 0.1111 0.3333 0.1111 0.2222 0.2222 18
nhr-120 0.1739 0.0994 0.2733 0.3168 0.1366 322
nhr-129 0.0767 0.3193 0.3950 0.0783 0.1307 3220
nhr-179 0.1579 0.0000 0.2632 0.3684 0.2105 19
nhr-19 0.1191 0.3010 0.3765 0.0550 0.1484 2183
nhr-2 0.1229 0.1877 0.4535 0.0432 0.1927 1204
nhr-20 0.0887 0.3458 0.3932 0.0558 0.1166 2762
nhr-21 0.1445 0.2287 0.4088 0.0920 0.1260 1294
nhr-23 0.1137 0.2958 0.3663 0.0853 0.1388 2708
nhr-232 0.1013 0.2405 0.4177 0.1392 0.1013 79
nhr-237 0.1137 0.3744 0.3270 0.0948 0.0900 211
nhr-25 0.1131 0.2469 0.4159 0.0786 0.1455 5533
nhr-270 0.2609 0.1522 0.0870 0.3913 0.1087 46
nhr-28 0.0836 0.3433 0.3734 0.0663 0.1334 5337
nhr-41 0.1700 0.2275 0.3625 0.0700 0.1700 400
nhr-42 0.1755 0.1194 0.2576 0.2590 0.1885 695
nhr-43 0.1893 0.2319 0.3486 0.1120 0.1183 634
nhr-47 0.1120 0.2813 0.3845 0.0814 0.1408 3267
nhr-48 0.1187 0.2663 0.3902 0.0925 0.1323 1179
nhr-6 0.0948 0.2557 0.4318 0.0838 0.1338 1181
nhr-67 0.0000 0.0000 0.5000 0.5000 0.0000 2
nhr-71 0.1082 0.2708 0.4089 0.0659 0.1462 5583
nhr-76 0.1138 0.2439 0.3902 0.1138 0.1382 123
nhr-77 0.1120 0.3591 0.3202 0.0810 0.1278 1902
nhr-80 0.0788 0.3398 0.3341 0.1109 0.1363 7195
nhr-84 0.0714 0.1667 0.2143 0.2857 0.2619 42
nhr-85 0.1332 0.2487 0.4416 0.0419 0.1345 788
nhr-90 0.1429 0.2558 0.2994 0.1455 0.1565 1904
npax-4 0.3333 0.1667 0.5000 0.0000 0.0000 6
odd-2 0.1259 0.1446 0.3333 0.1786 0.2177 588
pag-3 0.0895 0.2610 0.4265 0.0748 0.1483 816
pat-9 0.1059 0.2471 0.4235 0.0471 0.1765 85
pax-1 0.1333 0.2611 0.3889 0.0778 0.1389 180
pax-3 0.1338 0.2007 0.3944 0.0599 0.2113 284
peb-1 0.1455 0.1273 0.5455 0.0364 0.1455 55
pes-1 0.1723 0.1364 0.3133 0.0763 0.3017 865
pha-2 0.1538 0.2051 0.4359 0.0000 0.2051 78
pha-4 0.1030 0.3083 0.3620 0.0736 0.1530 8763
php-3 0.1108 0.2608 0.3345 0.1365 0.1574 2293
pop-1 0.1799 0.1715 0.3138 0.0753 0.2594 478
pqm-1 0.0733 0.3695 0.3377 0.0831 0.1365 6266
pros-1 0.0323 0.2366 0.5806 0.0645 0.0860 93
rcor-1 0.1865 0.3306 0.2078 0.1370 0.1381 847
ref-1 0.2325 0.0921 0.3246 0.0921 0.2588 228
ref-2 0.1002 0.1644 0.3287 0.2370 0.1697 2835
repo-1 0.2125 0.1020 0.1549 0.3806 0.1501 833
rnt-1 0.0855 0.3087 0.3842 0.0840 0.1376 3894
row-1 0.1371 0.2057 0.4343 0.0714 0.1514 350
saeg-2 0.1602 0.1481 0.3010 0.2282 0.1626 412
scrt-1 0.1451 0.1261 0.3316 0.2038 0.1934 579
sdz-12 0.1120 0.1094 0.2396 0.3568 0.1823 384
sdz-38 0.0952 0.0000 0.6190 0.1905 0.0952 21
sea-1 0.1796 0.1178 0.3333 0.1557 0.2136 501
sea-2 0.2130 0.1243 0.3077 0.1953 0.1598 169
sem-2 0.1575 0.0890 0.3219 0.2260 0.2055 146
sem-4 0.1049 0.2235 0.4698 0.0502 0.1517 877
skn-1 0.0664 0.4972 0.2893 0.0625 0.0846 1265
sma-3 0.1337 0.2765 0.3483 0.1059 0.1357 2409
sma-4 0.1427 0.2336 0.3091 0.1455 0.1692 715
sma-9 0.0952 0.2863 0.4018 0.0626 0.1541 4758
snai-1 0.1304 0.1522 0.3043 0.0435 0.3696 46
snpc-4 0.1683 0.2252 0.3174 0.0642 0.2248 8928
snu-23 0.0893 0.3227 0.4043 0.0624 0.1213 5243
somi-1 0.1461 0.1798 0.4607 0.0843 0.1292 178
sox-2 0.1685 0.1957 0.4783 0.0000 0.1576 184
sox-4 0.1130 0.1743 0.4387 0.0709 0.2031 522
spr-3 0.1780 0.1359 0.1618 0.3560 0.1683 309
sptf-1 0.1153 0.1973 0.3384 0.1102 0.2388 2559
sptf-2 0.0545 0.1636 0.1455 0.4727 0.1636 55
sup-37 0.0690 0.1379 0.3563 0.2644 0.1724 87
swsn-7 0.0761 0.3720 0.3811 0.0575 0.1134 1879
syd-9 0.0826 0.2397 0.3471 0.1653 0.1653 121
tab-1 0.1607 0.1387 0.3497 0.1558 0.1951 815
tag-97 0.1567 0.0821 0.3209 0.2836 0.1567 134
tbx-11 0.2117 0.1301 0.3087 0.1224 0.2270 392
tbx-2 0.1112 0.2915 0.3877 0.0628 0.1469 3949
tbx-37 0.1884 0.2568 0.3151 0.0959 0.1438 292
tbx-7 0.1000 0.4600 0.1500 0.0900 0.2000 100
tbx-8 0.0909 0.1818 0.3636 0.1364 0.2273 22
tbx-9 0.2623 0.1475 0.1803 0.3279 0.0820 61
tlp-1 0.0885 0.3451 0.3805 0.0619 0.1239 113
tra-1 0.1240 0.1973 0.3798 0.1246 0.1742 1693
tra-4 0.2353 0.1176 0.2353 0.2941 0.1176 17
ttx-3 0.1571 0.2286 0.3071 0.0714 0.2357 140
unc-120 0.0803 0.2668 0.4631 0.0535 0.1363 1233
unc-130 0.1088 0.4135 0.2789 0.0906 0.1082 1710
unc-3 0.1639 0.1202 0.3716 0.0328 0.3115 183
unc-30 0.0500 0.0500 0.5000 0.1500 0.2500 20
unc-39 0.1111 0.1111 0.4222 0.1556 0.2000 45
unc-42 0.0913 0.2057 0.4615 0.0399 0.2016 2158
unc-55 0.0829 0.3363 0.3908 0.0536 0.1365 3994
unc-62 0.1196 0.1815 0.4591 0.0424 0.1975 1747
unc-86 0.1092 0.2591 0.4123 0.0386 0.1808 907
vab-15 0.0915 0.2222 0.3987 0.1111 0.1765 153
vab-7 0.1672 0.1075 0.3418 0.1418 0.2418 670
xbp-1 0.0522 0.5274 0.2699 0.0647 0.0858 804
zag-1 0.0993 0.2009 0.5127 0.0416 0.1455 433
zfh-2 0.0971 0.0976 0.2693 0.4077 0.1282 5685
zfp-2 0.1481 0.1852 0.2593 0.1481 0.2593 27
zim-3 0.1484 0.0827 0.2203 0.3642 0.1844 1112
zip-11 0.2800 0.0800 0.3067 0.1733 0.1600 75
zip-2 0.0971 0.4563 0.2524 0.0874 0.1068 103
zip-4 0.0906 0.3346 0.2283 0.1654 0.1811 254
zip-5 0.1163 0.4651 0.1628 0.0581 0.1977 86
zip-8 0.1339 0.1377 0.3594 0.1294 0.2396 1561
znf-207 0.3478 0.1826 0.1217 0.2609 0.0870 115
ztf-1 0.1238 0.0857 0.2286 0.3905 0.1714 105
ztf-11 0.1553 0.1963 0.3836 0.0594 0.2055 219
ztf-16 0.0952 0.2857 0.3810 0.1429 0.0952 21
ztf-18 0.1443 0.3319 0.2208 0.1313 0.1717 693
ztf-22 0.1000 0.2588 0.3118 0.1529 0.1765 170
ztf-23 0.1573 0.1711 0.3339 0.1224 0.2153 1087
ztf-25 0.1995 0.1181 0.2703 0.2231 0.1890 762
ztf-26 0.1217 0.1565 0.3304 0.2304 0.1609 230
ztf-28 0.1521 0.2089 0.2860 0.1947 0.1582 493
ztf-29 0.1245 0.1572 0.3908 0.0655 0.2620 458
ztf-3 0.1579 0.1053 0.2105 0.2105 0.3158 19
ztf-4 0.1901 0.2117 0.2895 0.1454 0.1633 784
ztf-6 0.2155 0.1293 0.3362 0.1724 0.1466 116
ztf-7 0.1039 0.3925 0.3001 0.0707 0.1328 693
Total 0.1155 0.2788 0.3407 0.1122 0.1528 431037
