# Supplementary material for: Binding profiles for 961DrosophilaandC. eleganstranscription factors reveal tissue-specific regulatory relationships
Source: HighWire-hosted journal article supplement (doi:10.1101/gr.279037.124), 2024-10-22
Supplement: Supplemental_File_S6.xlsx [file Supplemental_File_S6.xlsx]

## Sheet: Supplemental_File_S6_Legend
Supplemental_File_S6. The relative importance of TFs in cell type expression. The importance values used for the heat maps in Figure 7 and Supplemental Figure S8 are given for the following stages in fly and worm.
s1. fly_embryo
s2.Worm_L4/yAd
s3. Worm_larvae
s4. Worm_lineage_embryo
s5. Worm_terminal_lineage

## Sheet: s1.fly_embryo
CellType	ATbp	Abd-B	Adf1	Aef1	Antp	Asciz	Atf-2	Atf3	Atf6	Awh	B-H1	B-H2	Bdp1	Blimp-1	BtbVII	BuGZ	C15	CG10147	CG10209	CG1024	CG10274	CG10321	CG10366	CG10431	CG10462	CG10543	CG10654	CG10949	CG10959	CG10979	CG11085	CG11093	CG11247	CG11398	CG11456	CG11504	CG11560	CG11695	CG11696	CG11723	CG11906	CG11966	CG12071	CG12104	CG12155	CG12219	CG12236	CG12299	CG1233
Amnioserosa	-1	-1	-1	-1	-1	-1	-1	-1	0.65381	-1	-1	-1	-1	0	-1	-1	0.646322	-1	-1	-1	-1	-1	-1	-1	-1	-1	-1	-1	-1	-1	-1	-1	-1	-1	-1	-1	-1	-1	-1	-1	-1	-1	-1	-1	-1	-1	-1	-1	-1
Anterior_midgut	-1	-1	-1	-1	-1	-1	-1	0.724553	-1	-1	-1	-1	0.648061	-1	-1	-1	-1	-1	-1	-1	-1	-1	-1	-1	-1	-1	-1	-1	-1	-1	-1	-1	-1	-1	-1	-1	-1	-1	-1	-1	-1	-1	-1	-1	-1	-1	-1	-1	0.725927
Bolwig_s_organ	0	-1	-1	0.713315	-1	0.688181	-1	-1	-1	-1	-1	-1	0.56223	-1	-1	-1	-1	-1	0.631593	-1	0.740032	0.785668	-1	0.67803	-1	-1	0.826067	0.616706	0.52981	-1	-1	-1	-1	-1	-1	0.650094	-1	-1	-1	-1	0.687765	-1	-1	-1	-1	-1	0.542956	0.759704	-1
Brain_and_ventral_nerve_cord_1	0.615989	-1	0.663043	-1	-1	0.739449	-1	-1	-1	-1	-1	-1	0.606744	-1	0.676097	-1	-1	-1	0.66828	0.680168	0.580866	0.749134	0.674161	-1	-1	-1	-1	0.737331	0.655267	0.52617	-1	-1	-1	-1	-1	0.744297	0.822354	0.806111	0.814872	0.851226	0.7726	-1	-1	0.227644	0.665875	0.590965	0.535312	0.85511	0.785565
Brain_and_ventral_nerve_cord_2	0.547178	-1	0.675628	-1	-1	-1	-1	-1	-1	-1	-1	-1	0.701699	-1	0.735925	-1	-1	-1	-1	0.795975	0.627049	0.780181	0.726888	-1	-1	-1	-1	0.760722	-1	0.634999	-1	-1	-1	-1	-1	0.816562	0.876361	-1	0.810143	0.783016	0.830432	-1	-1	0.504579	0.742127	0.660749	0.73946	0.738381	-1
Brain_and_ventral_nerve_cord_PR	0.604917	-1	0.59842	-1	-1	-1	-1	-1	-1	-1	-1	-1	0.670276	-1	0.676917	-1	-1	-1	-1	0.749791	0.573717	0.748272	0.680629	-1	-1	-1	-1	0.71538	-1	-1	-1	-1	-1	0.610815	-1	0.768256	0.805404	-1	0.771087	0.609195	0.776234	-1	-1	-1	0.660985	-1	0.612532	0.722866	0.747042
Cholinergic	-1	-1	-1	-1	0.829648	-1	0.943595	-1	-1	-1	-1	-1	-1	-1	-1	-1	-1	-1	-1	-1	-1	-1	-1	-1	-1	-1	-1	-1	-1	-1	-1	0.689563	-1	-1	-1	-1	-1	-1	-1	-1	-1	-1	0.733243	-1	-1	-1	-1	-1	-1
Chordotonal_organ	0.565475	-1	-1	-1	-1	-1	0.800268	1	-1	-1	-1	-1	-1	-1	-1	-1	-1	-1	-1	-1	-1	-1	-1	0.625278	-1	-1	-1	-1	0.555612	-1	-1	-1	-1	-1	-1	-1	-1	-1	0.611404	0.352268	-1	-1	0.628522	-1	-1	-1	-1	0.729285	-1
Chordotonal_sensory	-1	-1	-1	-1	0.785939	-1	-1	-1	-1	-1	-1	-1	-1	-1	-1	-1	-1	-1	-1	-1	-1	-1	-1	-1	-1	-1	0.748163	-1	-1	0.929368	-1	-1	-1	-1	-1	-1	-1	-1	-1	-1	-1	-1	0.763472	-1	-1	-1	-1	-1	-1
Copper_cells_1	-1	-1	-1	-1	-1	-1	-1	-1	0.790266	-1	-1	-1	-1	-1	-1	1	-1	-1	-1	-1	-1	-1	-1	-1	0	0.749605	-1	-1	-1	-1	-1	-1	-1	-1	-1	-1	-1	-1	-1	-1	-1	-1	-1	-1	-1	-1	-1	-1	-1
Copper_cells_2	-1	-1	-1	-1	-1	-1	-1	-1	-1	-1	-1	-1	0.7711	-1	-1	1	-1	-1	-1	-1	-1	-1	-1	-1	-1	-1	-1	-1	-1	-1	-1	-1	-1	-1	-1	-1	-1	-1	-1	-1	-1	-1	-1	-1	-1	0.799275	-1	-1	0.979594
Crystal_cell	-1	-1	-1	-1	-1	0.696579	-1	-1	-1	-1	-1	-1	-1	-1	-1	-1	-1	-1	-1	-1	-1	-1	-1	0.759289	-1	0.839508	-1	-1	-1	-1	-1	-1	-1	-1	-1	-1	-1	-1	-1	-1	-1	-1	-1	-1	-1	-1	-1	-1	-1
DV_epidermis_AISN	-1	0.925663	-1	-1	-1	-1	-1	-1	-1	0.829453	-1	0.728726	-1	0.6312	-1	-1	-1	-1	-1	-1	-1	-1	-1	-1	-1	-1	-1	-1	-1	-1	-1	-1	-1	-1	-1	-1	-1	-1	-1	-1	-1	-1	-1	-1	-1	-1	0.787367	-1	-1
Ectoderm_A	-1	0.864842	-1	-1	0.706991	-1	-1	-1	-1	0.791975	-1	-1	-1	-1	0.850542	0.593562	-1	-1	-1	-1	-1	-1	-1	-1	-1	-1	-1	-1	-1	-1	-1	-1	-1	0.755015	-1	-1	0.983601	-1	0.841916	-1	-1	-1	-1	-1	-1	-1	0.730021	-1	-1
Ectoderm_AISN	-1	0.784107	0.620117	-1	0.686476	-1	-1	-1	-1	0.731078	-1	-1	0.671109	-1	0.719596	0.471062	-1	-1	-1	0.720448	0.601426	-1	-1	-1	-1	-1	-1	-1	-1	-1	-1	-1	0.611551	0.494466	-1	-1	0.803442	-1	0.763306	-1	0.689374	-1	-1	-1	-1	-1	0.69284	-1	-1
Embryonic_body_wall	-1	-1	0.688356	0.716482	-1	-1	-1	-1	-1	-1	-1	-1	-1	-1	-1	-1	-1	-1	-1	-1	-1	0.740686	0.755218	-1	-1	-1	0.837088	-1	-1	-1	-1	-1	-1	-1	-1	-1	-1	-1	-1	-1	-1	-1	-1	0.731724	-1	-1	-1	-1	-1
Endoderm_PR	0.780421	-1	-1	-1	-1	-1	-1	-1	0.836062	-1	-1	-1	-1	-1	0.769882	0.882236	-1	-1	-1	-1	-1	-1	-1	-1	-1	-1	-1	-1	-1	-1	-1	-1	0.695571	-1	-1	-1	-1	-1	-1	-1	-1	-1	-1	-1	-1	-1	-1	-1	-1
Epicuticle	0.669972	-1	-1	-1	-1	-1	-1	-1	-1	-1	-1	-1	-1	-1	-1	-1	-1	0.751624	-1	-1	0.832881	-1	-1	-1	-1	-1	-1	-1	-1	0.875117	-1	-1	-1	-1	-1	-1	-1	0.81683	-1	0.897395	0.794748	-1	-1	-1	0.688427	-1	-1	-1	0.914566
Epidermal_epithelium	-1	-1	-1	-1	-1	-1	-1	-1	-1	-1	-1	-1	-1	0.783978	-1	-1	-1	-1	-1	-1	-1	-1	-1	-1	-1	-1	-1	-1	-1	-1	-1	-1	-1	-1	-1	-1	-1	-1	-1	-1	-1	-1	-1	-1	-1	-1	-1	-1	-1
Epidermis	-1	-1	-1	-1	-1	-1	-1	-1	-1	1	-1	-1	-1	-1	-1	-1	-1	-1	-1	-1	-1	-1	-1	-1	-1	-1	-1	-1	-1	-1	-1	-1	-1	-1	-1	-1	-1	-1	-1	-1	-1	0.672349	-1	-1	-1	-1	-1	-1	-1
Fat_body	-1	-1	-1	-1	-1	-1	-1	-1	-1	-1	-1	-1	-1	-1	-1	-1	-1	-1	-1	-1	-1	-1	-1	-1	-1	-1	-1	-1	-1	-1	-1	-1	-1	-1	-1	-1	-1	-1	-1	-1	-1	-1	-1	-1	-1	-1	-1	-1	-1
Foregut_primordium	-1	-1	-1	-1	-1	-1	-1	-1	0.858906	0.880426	0.865154	0.797914	-1	0.703802	-1	-1	-1	-1	-1	-1	-1	-1	-1	-1	-1	-1	-1	-1	-1	0.819732	-1	-1	-1	-1	-1	-1	-1	-1	-1	-1	-1	0.876674	-1	-1	-1	-1	-1	-1	-1
Garland_cell_nephrocyte	-1	-1	-1	-1	-1	-1	-1	-1	-1	-1	-1	-1	0.660003	-1	-1	-1	-1	0.69634	0.93222	-1	-1	-1	-1	0.631561	-1	-1	-1	-1	-1	-1	-1	-1	0.626579	-1	-1	-1	-1	-1	-1	1	0.707604	-1	-1	-1	0.62293	-1	-1	-1	-1
Germ_cells_ovaries	0.583254	-1	0.688237	0.699369	-1	0.716512	-1	-1	-1	-1	-1	-1	0.702002	-1	0.702103	-1	-1	-1	0.769054	0.763744	0.564917	-1	0.679422	-1	-1	-1	-1	0.755029	0.654368	0.677716	0.659716	-1	-1	0.776801	-1	0.713445	0.81619	0.813188	0.738244	0.77822	0.704494	-1	-1	0.668537	0.778416	0.681026	0.65481	0.851436	-1
Germ_cells_testes	-1	-1	0.789768	0.740732	-1	-1	0.783368	-1	-1	-1	-1	-1	-1	-1	0.829685	-1	-1	0.802894	0.719656	-1	0.695974	0.881257	-1	0.7975	-1	-1	-1	-1	-1	-1	-1	-1	-1	-1	0.668606	0.69919	-1	-1	-1	-1	-1	-1	-1	-1	-1	0.770706	-1	1	0.811016
Glutamatergic	-1	-1	-1	-1	0.915152	-1	-1	0.795651	-1	-1	-1	-1	-1	-1	-1	-1	-1	-1	-1	-1	-1	-1	-1	-1	-1	-1	-1	-1	-1	-1	-1	0.762839	-1	-1	-1	-1	-1	-1	-1	-1	-1	-1	0.765868	-1	-1	-1	-1	-1	-1
Head_trunk_mesoderm_PR	-1	0.863667	-1	-1	0.824375	-1	-1	-1	-1	-1	-1	-1	-1	-1	0.810984	0.743304	-1	-1	-1	-1	0.744237	-1	-1	-1	-1	-1	-1	-1	-1	-1	-1	-1	0.73404	-1	-1	-1	-1	-1	-1	-1	-1	-1	-1	-1	-1	0.891351	0.740251	-1	-1
Hindgut_proper_PR_analpad_SA	-1	-1	-1	0	-1	-1	-1	-1	-1	-1	-1	-1	-1	0.642332	-1	0.919812	-1	-1	-1	-1	-1	-1	-1	-1	-1	-1	-1	-1	-1	-1	-1	-1	-1	-1	-1	-1	-1	-1	-1	-1	-1	0.72339	-1	-1	-1	-1	-1	-1	-1
Large_intestine_border_cells_analpad	-1	-1	-1	-1	-1	-1	-1	-1	-1	-1	-1	-1	-1	-1	-1	-1	-1	-1	-1	-1	-1	-1	-1	-1	-1	-1	-1	-1	-1	-1	-1	-1	-1	-1	-1	-1	-1	-1	-1	-1	-1	-1	-1	-1	-1	-1	-1	-1	-1
Longitudinal_visceral_muscle	-1	-1	-1	-1	-1	0.64432	-1	-1	-1	-1	-1	-1	-1	-1	-1	-1	-1	-1	-1	-1	-1	-1	-1	-1	-1	0.598443	0.747394	-1	-1	-1	-1	-1	-1	-1	-1	-1	-1	-1	-1	-1	-1	-1	-1	-1	-1	-1	-1	-1	-1
Malpighian_tubule	-1	-1	-1	-1	-1	-1	-1	-1	-1	-1	-1	-1	-1	-1	-1	-1	-1	-1	-1	-1	-1	-1	-1	-1	-1	-1	-1	-1	-1	-1	0.820033	-1	-1	-1	-1	-1	-1	-1	-1	-1	-1	-1	-1	-1	-1	-1	-1	-1	-1
Maxillary_sensory_complex	0.786715	-1	-1	-1	-1	-1	-1	-1	0.834352	-1	-1	-1	-1	0	-1	-1	-1	-1	-1	0.805667	-1	-1	-1	-1	-1	-1	-1	-1	-1	-1	-1	-1	-1	0.74434	-1	-1	-1	-1	-1	-1	-1	0.930027	-1	-1	-1	-1	-1	-1	-1
Midgut_4th_chamber	-1	-1	-1	-1	-1	-1	-1	-1	-1	-1	-1	-1	-1	-1	-1	-1	-1	-1	-1	-1	-1	-1	-1	-1	-1	-1	0.79456	-1	-1	-1	0.792225	-1	-1	-1	0.656041	-1	-1	-1	-1	-1	0.732289	-1	-1	-1	-1	-1	-1	-1	-1
Midgut_primordium	-1	-1	-1	-1	-1	0.81092	-1	-1	0.843985	-1	-1	-1	-1	-1	-1	-1	-1	-1	-1	-1	-1	-1	-1	-1	0	0.740553	-1	-1	-1	-1	-1	-1	-1	-1	-1	-1	-1	-1	-1	0.847425	-1	-1	-1	-1	-1	-1	-1	-1	-1
Monoaminergic	-1	-1	-1	-1	0.70712	-1	-1	0.703432	-1	-1	-1	-1	-1	-1	-1	-1	-1	-1	0.845001	-1	-1	-1	-1	-1	-1	-1	0.579675	-1	0.737192	-1	-1	-1	-1	0.850021	-1	-1	0.718067	-1	-1	-1	-1	-1	0.659068	-1	0.722502	-1	-1	-1	0.799931
Multidendritic_sensory	-1	-1	-1	-1	0.841526	-1	-1	0.981217	-1	-1	-1	-1	-1	-1	-1	-1	-1	-1	-1	-1	-1	-1	-1	-1	-1	-1	-1	-1	-1	-1	-1	0.682932	-1	-1	-1	-1	-1	-1	-1	-1	-1	-1	0.674169	-1	-1	-1	-1	-1	-1
Muscle_system	-1	-1	-1	-1	-1	-1	-1	-1	-1	-1	-1	-1	-1	-1	-1	-1	-1	-1	-1	-1	-1	-1	-1	-1	0.708895	-1	0.775419	-1	-1	-1	-1	-1	-1	-1	-1	-1	-1	-1	-1	-1	-1	-1	-1	-1	-1	-1	-1	-1	-1
Muscle_system_2	-1	-1	-1	-1	-1	-1	-1	-1	-1	1	-1	-1	-1	-1	-1	-1	-1	-1	-1	-1	-1	-1	-1	-1	-1	-1	0.984654	-1	-1	-1	-1	-1	-1	-1	-1	-1	-1	-1	-1	-1	-1	0.853307	-1	-1	-1	-1	-1	-1	-1
Neuron_unknown_1	-1	-1	-1	-1	0.730389	-1	-1	0.676438	-1	-1	-1	-1	-1	-1	-1	-1	-1	-1	-1	-1	-1	-1	-1	0.844679	-1	-1	-1	-1	-1	0.726009	-1	0.681859	-1	-1	-1	-1	-1	-1	-1	-1	-1	-1	0.651277	-1	-1	-1	-1	-1	-1
Neuron_unknown_2	-1	-1	-1	-1	-1	-1	-1	1	-1	-1	-1	-1	0.699212	-1	-1	-1	-1	0.713447	-1	0.633641	-1	-1	-1	-1	-1	-1	-1	0.541466	-1	-1	-1	-1	-1	0.860657	-1	-1	-1	0.746422	-1	-1	-1	-1	-1	-1	-1	-1	-1	-1	0.816752
Neuron_unknown_3	-1	-1	-1	-1	-1	0.591407	0.835577	1	-1	-1	-1	-1	-1	-1	-1	-1	-1	-1	-1	-1	-1	-1	-1	0.672534	0.615137	-1	-1	-1	0.652445	-1	-1	-1	-1	-1	-1	-1	0.697539	-1	-1	-1	-1	-1	-1	-1	-1	-1	-1	-1	-1
NotAssigned	-1	-1	-1	-1	-1	-1	-1	-1	-1	-1	0.847858	-1	-1	-1	-1	-1	-1	-1	-1	-1	-1	-1	-1	-1	-1	-1	-1	-1	-1	-1	0.706454	-1	-1	-1	-1	-1	-1	-1	-1	-1	-1	-1	-1	-1	-1	-1	-1	-1	-1
Oenocytes	-1	-1	-1	-1	-1	-1	-1	0.738383	0.735962	-1	-1	-1	-1	-1	-1	-1	-1	-1	-1	-1	-1	-1	-1	-1	-1	-1	-1	0.784265	0.819205	0.757159	-1	-1	0.728758	-1	-1	0.714844	-1	-1	-1	-1	-1	-1	-1	-1	-1	-1	-1	-1	-1
Oenocytes_LS	-1	-1	-1	-1	-1	-1	-1	1	-1	-1	-1	-1	-1	-1	-1	-1	-1	-1	-1	-1	-1	-1	-1	-1	-1	-1	0.762051	0.62405	-1	-1	-1	-1	-1	0.874045	0.837171	-1	-1	-1	-1	-1	-1	-1	-1	-1	0.764583	-1	-1	-1	-1
Olfactory_neurons	-1	-1	-1	-1	-1	-1	-1	0.925431	0.766044	-1	-1	-1	-1	-1	-1	-1	-1	-1	-1	-1	-1	-1	-1	-1	-1	-1	-1	-1	-1	-1	-1	-1	0.796785	-1	-1	-1	-1	-1	-1	-1	-1	-1	-1	-1	-1	-1	-1	-1	-1
Peptidergic_neuron	-1	-1	-1	-1	0.643566	-1	0.86824	0.817865	-1	-1	-1	-1	-1	-1	-1	-1	-1	-1	-1	0.816635	-1	-1	-1	-1	-1	-1	0.742309	-1	-1	-1	-1	0	-1	-1	-1	-1	-1	0.862277	-1	-1	-1	-1	-1	-1	-1	-1	-1	-1	-1
Peripheral_nervous_system	-1	-1	-1	-1	0.757314	-1	0.714606	-1	-1	-1	0.738582	0.753786	-1	-1	-1	-1	-1	-1	-1	-1	-1	-1	-1	-1	-1	-1	-1	-1	-1	-1	-1	-1	-1	0.943862	-1	-1	-1	-1	-1	-1	-1	-1	0.73766	-1	-1	-1	-1	-1	-1
Peripheral_nervous_system_PR	-1	-1	-1	-1	0.867034	-1	-1	-1	-1	0.819631	0.762963	0.776861	-1	-1	0.775196	0.541494	-1	-1	-1	-1	-1	-1	-1	-1	-1	-1	-1	-1	-1	-1	-1	-1	0.758089	-1	-1	-1	-1	-1	-1	-1	-1	-1	-1	-1	-1	-1	-1	-1	-1
Pharynx	-1	-1	-1	-1	-1	-1	-1	-1	-1	0.905948	-1	-1	-1	-1	-1	-1	-1	-1	-1	-1	-1	-1	-1	0.974974	-1	-1	-1	-1	-1	-1	-1	-1	-1	-1	-1	-1	-1	-1	-1	-1	-1	0.841575	-1	-1	-1	-1	-1	-1	-1
Pharynx_2	-1	-1	-1	-1	-1	-1	-1	-1	-1	-1	-1	-1	-1	-1	-1	-1	-1	-1	-1	-1	-1	-1	-1	-1	-1	-1	-1	-1	-1	-1	-1	-1	-1	-1	-1	-1	-1	-1	-1	-1	-1	-1	-1	-1	-1	-1	-1	-1	-1
Plasmatocytes	-1	-1	-1	-1	-1	-1	-1	-1	-1	-1	-1	-1	-1	-1	-1	-1	-1	-1	-1	-1	-1	-1	-1	-1	-1	-1	-1	-1	-1	-1	-1	-1	-1	-1	-1	-1	-1	-1	-1	-1	-1	-1	-1	0.842388	-1	-1	-1	-1	-1
Plasmatocytes_anlage	-1	-1	-1	-1	-1	-1	-1	-1	-1	-1	-1	-1	-1	-1	-1	-1	-1	-1	-1	-1	-1	-1	-1	-1	-1	-1	-1	-1	-1	-1	-1	-1	-1	-1	-1	-1	-1	-1	-1	-1	-1	-1	-1	-1	-1	0.684351	-1	-1	-1
Posterior_Midgut_1	-1	-1	-1	0.732363	-1	-1	-1	-1	0.783098	-1	-1	-1	-1	-1	-1	0.990583	-1	-1	-1	-1	-1	-1	-1	-1	0.667648	0.745359	-1	-1	-1	-1	0.865281	-1	-1	-1	-1	-1	-1	-1	-1	-1	-1	-1	-1	-1	-1	-1	-1	-1	-1
Posterior_midgut_2	-1	-1	-1	-1	-1	-1	-1	-1	-1	-1	-1	-1	-1	-1	-1	0.970243	-1	-1	-1	-1	-1	-1	-1	-1	0.741103	-1	-1	-1	-1	-1	-1	-1	-1	0.911997	-1	-1	-1	-1	-1	-1	-1	-1	-1	-1	-1	-1	-1	-1	1
Posterior_midgut_3	-1	-1	-1	-1	-1	-1	-1	-1	-1	-1	-1	-1	-1	-1	-1	-1	-1	-1	0.880311	-1	-1	-1	-1	-1	0.722001	-1	0.752952	-1	-1	-1	-1	-1	-1	-1	-1	-1	-1	0.916564	0.800788	-1	-1	-1	-1	-1	-1	0.878231	-1	-1	1
Posterior_spiracle	-1	0.773835	-1	-1	-1	-1	-1	-1	-1	-1	-1	-1	-1	-1	-1	-1	-1	-1	-1	-1	-1	-1	-1	-1	-1	-1	-1	-1	-1	-1	-1	-1	-1	-1	-1	-1	-1	-1	-1	-1	-1	0.835845	-1	-1	-1	-1	-1	-1	-1
Procephalic_ectoderm_A	-1	-1	0.726303	-1	-1	-1	-1	-1	-1	0.776505	-1	-1	0.683061	-1	0.720521	0.527912	-1	-1	-1	-1	-1	-1	0.793695	-1	-1	-1	-1	-1	-1	-1	-1	-1	0.746179	-1	-1	-1	0.901816	-1	0.798102	-1	0.779257	-1	-1	-1	-1	0.77904	0.718155	0.787303	0.817476
Procephalic_ventral_ectoderm_AISN	-1	-1	-1	-1	-1	-1	-1	-1	-1	-1	-1	-1	-1	0	0.804065	0.52672	-1	-1	-1	-1	-1	-1	-1	-1	-1	-1	-1	-1	-1	-1	-1	-1	0.816184	0.933328	-1	-1	0.885344	-1	-1	-1	-1	-1	-1	-1	-1	-1	0.895716	-1	-1
Procuticle	-1	-1	-1	-1	-1	-1	-1	-1	-1	-1	-1	-1	-1	-1	-1	-1	-1	-1	-1	-1	0.714757	0.820074	-1	-1	-1	-1	0.646292	-1	-1	-1	-1	-1	-1	-1	-1	0.646856	-1	-1	-1	-1	-1	-1	-1	0.595624	-1	-1	-1	-1	0.940621
Progenitor_cells_1	0.553388	-1	0.677996	-1	-1	-1	-1	-1	-1	-1	-1	-1	0.676997	-1	0.745859	-1	-1	-1	-1	-1	0.670478	0.801879	0.785191	-1	-1	-1	-1	-1	-1	0.63456	-1	-1	0.622986	-1	-1	0.738883	0.872297	0.804635	0.874985	0.777708	0.819154	-1	-1	0.501805	0.695739	0.644638	0.644549	0.853098	0.778728
Progenitor_cells_2	0.700081	-1	0.69351	0.784753	-1	0.703948	-1	-1	-1	-1	-1	-1	-1	-1	-1	-1	-1	-1	-1	0.751121	-1	0.817225	0.76146	-1	-1	-1	-1	-1	-1	-1	-1	-1	0.73379	-1	-1	0.750561	0.81975	-1	0.862982	-1	-1	-1	-1	-1	0.675981	0.665201	0.622912	-1	-1
Progenitor_cells_3	-1	-1	0.711559	-1	-1	0.647153	-1	-1	-1	-1	-1	-1	0.528664	-1	-1	-1	-1	-1	0.702421	0.609583	0.676877	0.804733	0.645805	-1	-1	-1	0.7128	0.715242	-1	0.655482	-1	-1	-1	-1	-1	0.711899	0.799006	0.778235	0.891541	-1	-1	-1	-1	0.48557	0.756999	0.642289	-1	0.746116	-1
Proventriculus_1	-1	-1	-1	-1	-1	-1	-1	-1	0.766448	-1	-1	-1	-1	-1	-1	-1	-1	-1	-1	-1	-1	-1	-1	-1	0.720844	-1	-1	-1	-1	-1	-1	-1	-1	-1	-1	-1	-1	-1	-1	-1	-1	-1	-1	1	-1	-1	-1	-1	-1
Proventriculus_2	-1	-1	-1	-1	-1	-1	-1	-1	-1	-1	-1	-1	-1	-1	-1	-1	-1	-1	-1	-1	-1	-1	-1	-1	-1	-1	-1	-1	-1	-1	-1	-1	-1	-1	-1	-1	-1	-1	-1	-1	-1	-1	-1	0.618905	-1	-1	-1	0.896119	1
Salivary_gland	-1	-1	-1	-1	-1	0.843228	0.890887	-1	-1	-1	-1	-1	-1	-1	-1	-1	-1	-1	-1	-1	-1	0.857476	-1	-1	-1	-1	-1	-1	-1	-1	-1	-1	-1	0.981381	0.531291	-1	-1	0.857498	-1	-1	-1	-1	-1	-1	-1	-1	-1	-1	-1
Salivary_gland_LS	0.715249	-1	-1	0.820853	-1	-1	-1	1	-1	-1	-1	-1	0.615301	-1	-1	-1	-1	-1	-1	0.599729	-1	-1	0.66428	-1	-1	-1	-1	0.823926	-1	-1	-1	-1	-1	-1	-1	-1	-1	0.687948	-1	-1	-1	-1	-1	-1	-1	-1	-1	-1	0.819257
Salivary_gland_PR	-1	-1	-1	-1	-1	-1	-1	-1	0.570793	-1	-1	-1	-1	-1	-1	-1	-1	-1	-1	-1	-1	-1	-1	-1	-1	0.665576	-1	-1	-1	-1	-1	-1	0	-1	-1	-1	-1	-1	-1	-1	-1	-1	-1	-1	-1	-1	-1	-1	-1
Sense_organs	-1	-1	-1	-1	-1	-1	-1	-1	0.870543	-1	0.828859	0.754347	-1	-1	-1	-1	-1	0.730975	-1	-1	-1	-1	-1	-1	-1	0.8096	-1	-1	-1	0.800432	-1	-1	0.846336	-1	-1	-1	-1	-1	-1	-1	-1	-1	-1	-1	-1	-1	-1	-1	-1
Somatic_muscle	-1	-1	-1	-1	-1	-1	-1	-1	-1	-1	-1	-1	-1	-1	-1	-1	-1	-1	-1	-1	-1	-1	-1	-1	-1	-1	-1	-1	-1	-1	-1	-1	-1	-1	-1	-1	-1	-1	-1	-1	-1	-1	-1	-1	-1	-1	-1	-1	-1
Tracheal_PR	-1	0.847422	-1	-1	-1	-1	-1	-1	0.750082	-1	-1	-1	-1	0.646957	-1	-1	-1	-1	-1	-1	-1	-1	-1	-1	-1	-1	-1	-1	-1	-1	-1	-1	-1	-1	-1	-1	-1	-1	-1	-1	-1	-1	-1	-1	-1	-1	-1	-1	-1
Tracheal_system_1	-1	-1	-1	-1	-1	-1	-1	0.898715	-1	-1	-1	-1	-1	0.768032	-1	-1	-1	-1	-1	-1	-1	-1	-1	-1	-1	-1	-1	-1	-1	-1	-1	-1	-1	-1	-1	-1	-1	-1	-1	-1	-1	0.734826	-1	-1	-1	-1	-1	-1	-1
Tracheal_system_2	-1	-1	-1	-1	-1	-1	-1	-1	-1	-1	-1	-1	-1	0.80866	-1	-1	-1	-1	-1	-1	-1	-1	-1	-1	-1	0.916627	-1	-1	-1	-1	-1	-1	-1	-1	-1	-1	-1	-1	-1	-1	-1	0.917664	-1	-1	-1	-1	-1	-1	-1
Tracheal_system_3	-1	-1	-1	-1	-1	-1	-1	-1	-1	-1	-1	-1	-1	-1	-1	-1	-1	-1	-1	-1	-1	-1	-1	-1	-1	-1	-1	-1	-1	-1	-1	-1	-1	-1	-1	-1	-1	-1	-1	-1	-1	-1	-1	-1	-1	-1	-1	-1	-1
Ventral_midline	-1	0.817709	-1	-1	0.795067	-1	-1	-1	-1	-1	-1	-1	-1	-1	-1	-1	-1	-1	-1	-1	-1	-1	-1	-1	-1	-1	-1	-1	-1	-1	-1	-1	0.852176	-1	-1	-1	-1	-1	-1	-1	-1	-1	-1	-1	-1	-1	-1	-1	-1
Visceral_mesoderm_PR	-1	-1	-1	-1	-1	-1	-1	-1	-1	-1	-1	-1	-1	-1	0.834496	0.891511	-1	-1	-1	-1	-1	-1	-1	-1	0.0808317	-1	0.992829	-1	-1	0.713084	-1	-1	-1	0.766724	-1	-1	-1	-1	-1	-1	-1	-1	-1	-1	-1	-1	0.95107	-1	-1
Visceral_muscle	-1	-1	-1	-1	-1	-1	-1	-1	-1	-1	-1	-1	-1	-1	-1	-1	-1	-1	-1	-1	-1	-1	-1	-1	-1	-1	0.935597	-1	-1	-1	-1	-1	-1	-1	-1	-1	-1	-1	-1	-1	-1	-1	-1	-1	-1	-1	-1	-1	-1
large_intestine_hindgut_analpad_1	-1	-1	-1	-1	-1	-1	-1	-1	0.773793	-1	-1	-1	-1	0	-1	-1	-1	-1	-1	-1	-1	-1	-1	0.77552	0.724404	-1	-1	-1	-1	-1	-1	-1	-1	-1	-1	-1	-1	-1	-1	-1	-1	0.731655	-1	-1	-1	-1	-1	-1	1
large_intestine_hindgut_analpad_2	-1	-1	-1	-1	-1	-1	-1	-1	-1	-1	-1	-1	-1	-1	-1	-1	-1	-1	-1	-1	-1	-1	-1	-1	-1	-1	-1	-1	-1	-1	-1	-1	-1	-1	-1	-1	-1	-1	-1	-1	-1	-1	-1	-1	-1	-1	-1	-1	-1
lateral_cord_glia	-1	-1	-1	-1	-1	-1	-1	-1	0.828151	-1	-1	-1	-1	-1	-1	-1	-1	-1	0.913251	-1	-1	-1	-1	-1	-1	-1	0.79992	-1	-1	-1	-1	-1	-1	-1	-1	-1	-1	-1	-1	-1	-1	-1	-1	-1	-1	-1	-1	-1	-1
unknown_3	-1	-1	-1	0.704948	-1	-1	-1	-1	-1	-1	-1	-1	-1	-1	-1	-1	-1	0.749138	-1	-1	-1	0.820512	0.707272	-1	0	0.947667	-1	0.787324	0.700785	-1	-1	-1	-1	-1	-1	-1	-1	-1	-1	-1	-1	-1	-1	-1	0.826078	-1	-1	1	-1
unknown_4	-1	-1	-1	-1	-1	-1	-1	0.998758	-1	-1	-1	-1	-1	-1	0.799632	-1	-1	0.765861	-1	-1	-1	-1	0.779185	-1	0.168343	-1	-1	-1	-1	-1	-1	-1	-1	-1	0.744209	-1	0.821205	0.82477	-1	-1	-1	-1	-1	0.68104	-1	-1	-1	-1	-1
unknown_5	-1	-1	-1	-1	-1	-1	-1	-1	-1	-1	-1	-1	0.764907	-1	-1	-1	-1	-1	-1	-1	-1	-1	-1	0.761084	-1	-1	-1	-1	-1	0.762236	-1	-1	-1	-1	0.724888	-1	-1	-1	-1	-1	-1	-1	-1	-1	-1	-1	-1	-1	-1
unknown_6	-1	-1	-1	-1	-1	-1	-1	-1	-1	-1	-1	-1	-1	-1	-1	-1	-1	-1	-1	-1	-1	-1	-1	-1	-1	-1	-1	-1	-1	-1	-1	0.844088	-1	-1	-1	-1	-1	-1	-1	-1	-1	0.86326	-1	-1	0.825097	-1	-1	-1	-1
[truncated: 433 more columns]

## Sheet: s2.Worm_L4_adult
CellType	B0261.1	D1046.2	D2030.7	F10B5.3	F10E7.11	F22D6.2	F23B12.7	F26F4.8	F33H1.4	F37B4.10	F39B2.1	F44E2.7	F52B5.7	F57C9.4	K11D2.4	K12H6.12	R02D3.7	T07F8.4	T20F7.1	Y105C5A.15	Y48G9A.11	Y53G8AR.9	Y56A3A.18	Y5F2A.4	Y67H2A.10	Y75B8A.6	Y79H2A.3	Y95B8A.8	ZK185.1	ZK337.2	ZK546.5	aha-1	aptf-2	aptf-3	arid-1	atf-7	athp-1	attf-3	attf-4	attf-5	attf-6	bed-1	bed-2	cebp-1	cebp-2	ceh-100	ceh-20	ceh-27	ceh-32
ADF	0.366381	-1	0	-1	-1	0.707305	0.5102	-1	0.607308	0	-1	0.822401	-1	0.733307	-1	0.524528	0.833746	0.687235	-1	0.588619	-1	-1	0.644079	0.681963	0.458296	-1	0.442797	0.69734	-1	-1	-1	0.870648	-1	-1	-1	0.646667	0.548995	0	1	0.44531	-1	0.521107	0.525636	-1	0.564724	0.539787	-1	-1	-1
ADL	0	-1	0.529163	-1	-1	0.576392	0.489772	-1	-1	-1	0.601629	0.819425	-1	0.58478	0.621409	0.641954	-1	0.627686	-1	0.389096	-1	0.628887	0.528169	0.669357	0.434665	0.554695	0.58014	0.724296	0.554896	0.486398	0.320247	1	-1	0.539695	0.517427	0.677864	0.465899	-1	-1	0.443852	-1	0.387903	0.523782	0.483718	0.568975	-1	-1	-1	-1
AFD	0.579131	-1	0.46856	-1	-1	0.607267	0.403943	-1	0.532975	-1	0.536866	0.71049	-1	0.584283	-1	-1	0.732043	-1	-1	0.496618	-1	0.523606	0.605715	0.602502	-1	-1	0.501932	0.671904	-1	0.5636	0.515038	0.736803	-1	0.694148	0.621464	0.571863	0.719037	-1	-1	0.377343	0.638842	0.539065	-1	0	-1	0.551093	-1	-1	-1
AIA	-1	-1	0.547802	-1	-1	0.703104	-1	-1	0.666589	-1	0.661329	-1	-1	0.71834	0.745387	-1	-1	-1	0	0.48952	-1	0.587895	0.578485	0.665899	-1	-1	-1	-1	0.701943	-1	0.515808	1	-1	0.579646	0.520485	0.754696	0.616069	-1	-1	-1	0.670796	0.633907	-1	0	0.518661	-1	0.717962	-1	-1
AIB	0.439482	-1	-1	-1	-1	0.688492	0.501427	-1	0.641588	-1	-1	0.782456	0.584867	0.699075	-1	-1	0.808004	0.714418	-1	-1	-1	0.422528	0.606949	0.668252	-1	-1	0	0.717063	0.661644	-1	-1	0.92715	-1	-1	0.501011	0.799021	-1	0.584518	-1	-1	0.991834	0.748758	-1	0	0.479272	0.475486	0.778194	-1	-1
AIM	0.566204	0.745359	0	-1	-1	0.596393	0.523302	-1	0.626042	0.413183	0.54087	0.807703	0.492405	0.749744	0.598673	-1	0.825319	0.697614	-1	0.396337	0.514622	-1	0.509851	0.553083	-1	-1	0.464763	-1	-1	0.476059	0.510909	0.753039	-1	0.508493	-1	0.757155	0.518002	-1	0.879059	0.499424	0.712878	0.50664	-1	0.535949	0.417813	0.457084	0.632924	-1	-1
AIN	0	0.674222	0	-1	-1	0.680318	0.548471	-1	0.628126	0.295984	-1	0.887352	0.708431	0.842891	0.723041	-1	0.890609	-1	-1	0.572639	-1	-1	0.592063	0.681806	-1	0.636578	0.40249	-1	-1	-1	0.63701	0.92427	-1	-1	-1	0.775026	0.655493	-1	-1	0.459505	0	0.619279	-1	-1	0.503499	0.54011	-1	-1	-1
AIY	0	-1	-1	-1	-1	0.823793	-1	-1	0	-1	-1	0.757175	-1	0.770628	0.579089	-1	0.694456	-1	-1	0.400689	-1	0	0.49332	0.525121	0.524798	0.594586	-1	0.618129	-1	0.376534	0.447283	1	0.493176	-1	0.511003	0.664657	0.540003	-1	0.963888	-1	0.62741	0.599976	-1	-1	0	-1	0.641836	-1	-1
AIZ	0	-1	0	-1	-1	0.739606	0.600272	-1	-1	-1	0.747983	0.85345	-1	0.735554	0.750253	-1	-1	0.694895	0.568185	-1	-1	0.552667	0.597224	0.56124	-1	-1	0.473104	0.766336	-1	-1	0.591638	-1	0.333366	0.65802	-1	0.864259	0.608159	-1	-1	0.495038	0.853665	0.789299	-1	0.523841	0	0.462672	0.863251	-1	-1
ALA	0	0.737197	0	-1	-1	0.671573	0.475117	-1	0.549884	-1	-1	0.795246	0.43842	0.587923	-1	-1	0.78633	-1	0	0.409254	-1	0.477194	0.591841	0.566817	-1	-1	-1	-1	0.584488	-1	-1	0.75602	-1	0.518658	-1	0.764904	-1	-1	0.848061	-1	0.588951	0.352876	-1	-1	0.410379	-1	0.67875	-1	-1
AMsh	0.50561	1	0.601855	-1	0.284787	0.879078	0.627294	-1	0.820915	-1	0.752942	0.908053	-1	0.81455	0.711436	-1	0.728163	0.874986	0.665073	-1	0.57184	0.587154	0.624092	0.617482	0.597376	-1	-1	0.626389	0.799097	-1	0.316967	0.455809	-1	0.67021	0.549046	0.669408	0.526416	0.351501	0.902654	0.646143	0.906067	0.531833	0.597305	0.384138	0.681528	0.51615	-1	-1	-1
AMso	0.510925	-1	0.57108	-1	-1	0.847786	0.529253	-1	0.612507	0.838852	0.646405	0.780401	0.52141	0.556458	-1	-1	0.612205	0.59073	-1	0.485306	-1	0.670712	0.526326	0.542987	0.660917	-1	-1	-1	-1	-1	0.282996	-1	-1	0.563835	-1	0.717392	0.617408	0	-1	-1	0.714128	-1	-1	-1	0.724356	0.468162	-1	-1	-1
AS	0.479953	0.598756	0.443333	-1	-1	0.533817	0.40106	-1	0.485443	0.576867	0.52434	0.752857	0.640059	0.685784	0.687676	-1	0.733702	0.669557	0.468424	0.428008	-1	0.638188	0.453471	0.479423	0.412644	0.509234	0.463895	-1	0.618297	0.591059	1	0.87146	-1	-1	0.51628	0.538742	0.449605	0	0.832608	0.394167	0.658691	0.637333	0.520396	0.539987	0.436459	0.408554	0.699389	-1	-1
ASE	0.528577	-1	0.700241	-1	-1	0.738262	0.579217	-1	0.603262	-1	0.674313	0.878862	0.648172	0.804154	-1	-1	-1	-1	0.57478	0.591028	-1	-1	0.628205	0.747992	-1	-1	0.493	-1	-1	0.654144	0.67998	-1	-1	0.584033	0.593771	0.770447	0.553306	0	-1	-1	0.726053	0.550456	-1	0.515557	0.676578	0.526199	0.655892	-1	-1
ASG	0	-1	0	-1	-1	0.635081	0.453642	-1	0.663161	-1	0.732696	0.906997	0.544593	0.668221	0.659572	-1	-1	0.727959	0.639905	-1	-1	0.575282	-1	0.70151	0.525202	0.621516	-1	0.779024	0.686083	-1	0	0.969354	-1	-1	0.52747	0.871895	0.592834	0	-1	0.490864	0.822382	0.528407	0.658719	-1	0.393129	0.526165	-1	-1	-1
ASH	-1	-1	0.545322	-1	-1	0.575258	-1	-1	-1	0.459892	0.669679	-1	-1	0.692132	-1	0.447573	0.742112	-1	0.516266	-1	-1	0.572734	0.605273	0.724632	-1	-1	0.519707	0.785443	-1	0.498628	0.432533	0.925443	-1	-1	-1	0.696345	0.39544	-1	1	-1	0.690158	0.419485	-1	0.440853	0.566114	-1	-1	-1	-1
ASI	0	0.736927	0	0.418034	-1	0.667406	0.496201	-1	0.643026	-1	0.640929	0.869253	0.585089	0.676045	-1	-1	0.850981	0.634761	-1	0.532833	-1	0.648418	0.626461	0.785976	-1	-1	-1	0.697701	-1	-1	0	0.871331	-1	0.555192	0.650357	0.724658	-1	-1	-1	0.491637	0.750239	0.434752	0.579031	0.511249	0	-1	0.514326	-1	-1
ASJ	0	-1	-1	-1	-1	0.691561	0.498001	-1	0.565985	0	0.561715	0.854722	0.541985	0.77198	-1	0.466618	0.703262	0.533477	0.476568	0.433754	-1	0	0.53032	-1	0.446424	0.559688	0.332526	-1	-1	-1	1	0.77403	-1	-1	0.5446	0.670679	0.579303	-1	0.946752	0.386519	0.768695	0.606072	0.460354	0	0.468553	0	0.537159	-1	-1
ASK	0.558006	-1	-1	0.846032	-1	0.770217	0.528601	-1	-1	-1	0.582212	0.742591	0.514276	0.573626	-1	0.536189	0.635364	0.656347	0.502224	-1	-1	0.475498	0.553955	-1	-1	-1	-1	0.668775	-1	-1	0.368629	0.808576	-1	0.504644	-1	-1	0.390793	-1	-1	-1	0.570373	0.203707	0.41714	0.463976	0.521903	0.554647	-1	-1	-1
AUA	0	0.662183	0	-1	-1	0.677058	-1	-1	0.636703	-1	0.668349	0.888903	0.549045	0.686906	0.64745	-1	-1	-1	0.512381	0.459785	-1	0.572494	0.720593	-1	-1	0.573136	0.438467	0.726495	-1	0.57416	1	0.903566	-1	-1	0.462623	0.670048	0.565726	-1	0.957616	0.496881	-1	-1	-1	-1	-1	0.41804	0.631911	-1	-1
AVA	0	-1	0.449952	0.333974	-1	0.49604	0.434398	-1	0.514882	-1	0.529976	0.760629	0.519697	0.607838	0.772846	-1	0.756037	0.683368	0.463596	0.404173	-1	0.507011	0.544296	0.516005	0.433157	-1	0.494932	-1	-1	0.600072	0.988889	1	-1	-1	0.429856	0.571925	0.46449	0.419265	-1	0.439137	0.575201	0.624814	0.512974	0.580962	0.579937	0.438481	-1	-1	-1
AVB	0.581384	-1	0.568535	-1	-1	0.55139	0.473663	-1	0	-1	0.687078	0.846572	-1	0.711695	0	0.513691	0.798032	0.80007	0	0.325984	-1	0.551756	0.626344	0.550617	-1	-1	0.554998	0.585139	-1	-1	-1	0.807519	-1	0.632459	-1	0.626967	-1	0.581771	-1	-1	0.638905	0.795742	0.614355	0.55161	0.60476	0.504798	-1	-1	-1
AVD	0	0.846203	0	0.337743	-1	0.522394	0.379451	-1	0	0.812876	0	0.732715	0.460371	0	0	-1	0.726263	0.601695	-1	0	0.778405	0	0.486555	0.53604	0.40423	-1	0	0	0.504925	0.389943	0.546821	0.63791	-1	-1	-1	0.491867	0.442961	0	-1	0.427453	0.580405	0	0.560085	0	0	0.390901	0.411131	-1	-1
AVE	0	0.544986	0	0.355255	-1	0.487381	0.338563	-1	0.42297	0	0.513015	0.617981	0.531523	0.500455	0.560543	-1	0.617481	0.568508	0	0.384715	-1	0	0.424416	0.440907	0.444128	0.421772	0.402718	0.540878	0.474877	-1	1	0.783282	0.374596	-1	0.364732	0.466072	0.396743	-1	0.74558	-1	0.479575	0.679661	0.488392	0	0.338174	0.393049	-1	-1	-1
AVF	-1	-1	0.534332	-1	-1	0.614782	0.751841	-1	-1	-1	0.619306	0.817668	-1	0.69853	0.738849	-1	-1	-1	-1	0	-1	-1	0.569025	0.632371	0.573885	-1	0.540718	-1	0.741988	0.613796	0.478448	0.84929	-1	-1	-1	0.680949	0.570072	0	1	0.508009	0.754889	0.576199	-1	0.98722	0.55532	0	-1	-1	-1
AVH	0.838141	-1	0.818161	-1	-1	0.727117	0.626613	-1	0.741777	0.875297	0.648699	0.952167	0.705612	0.8248	0.709735	-1	-1	0.805435	0	0.612953	-1	-1	-1	-1	-1	-1	0.549122	0.753283	-1	0.631257	0.752976	0.847765	-1	-1	0.654891	0.717853	-1	0.704256	-1	-1	0.781656	0.578134	-1	0.779226	0.645714	-1	0.681645	-1	-1
AVJ	0.511986	-1	0.233726	0.325146	0.481284	0.557301	0.540635	-1	0.497841	0.604031	0.629989	0.827283	0.522037	-1	0.624641	0.75693	0.662561	0.720156	0.401346	0.509717	-1	-1	0.549365	0.656007	0.425066	-1	0.597408	0.722805	-1	0.588426	1	0.878035	-1	-1	0.4717	0.520211	0.533187	0.297112	0.974193	0.455739	0.730167	0.602526	0.555356	0.714281	0.590652	0.597579	0.614723	-1	-1
AVK	0	0.621934	-1	-1	-1	0.601077	0.519778	-1	0.761638	-1	0	0.878229	0.502279	0.687759	-1	-1	0.912168	-1	-1	0	-1	0	0.578649	0.499174	-1	-1	0.345652	-1	-1	-1	0.664075	-1	-1	-1	-1	0.79094	-1	0.449101	-1	-1	0.902038	0.54149	-1	0	0	0.509537	-1	-1	-1
AVL	0	-1	-1	0.427711	-1	0.510093	0.437653	-1	-1	0	0.475886	0.748846	0.628142	0.524853	0.573824	-1	0.735834	0.571977	0	0.33097	-1	0	0.599433	-1	-1	-1	0	-1	-1	-1	0.894969	0.549595	-1	-1	-1	0.75881	-1	-1	0.817774	0.430873	0.694935	0.691327	0.593881	0	0.582472	0.43172	0.624469	0.851466	-1
AVM	0	-1	-1	-1	-1	0.666672	-1	-1	-1	0.814726	-1	0.773679	1	0.544917	0	-1	0.624234	0.656367	-1	0	-1	0	0.575969	-1	0.421607	0.802234	0	0.600732	-1	0.518405	0.460567	-1	-1	0.469106	0	0.655772	0.768955	0	0.866373	-1	0.847479	0	-1	0.764243	0	0.452442	0.545838	-1	-1
AWA	0	-1	0.402605	-1	-1	0.570994	-1	-1	0.656392	0.404968	0.529247	0.831269	-1	0.575314	0.565031	0.539213	0.822918	0.629061	-1	0.545289	-1	0	0.601126	0.616102	-1	-1	-1	0.631601	-1	-1	-1	0.862346	-1	0.568908	-1	0.632005	0.619999	-1	-1	-1	-1	0.338128	-1	0	0.531692	0.451675	-1	-1	-1
AWB	0.653886	-1	0.424749	-1	-1	0.648558	-1	-1	0.580627	-1	0.619083	0.842428	0.650831	0.667537	0.722794	0.45356	0.808527	0.685687	-1	0.521004	-1	0	0.581552	0.719823	0.333268	-1	0.425948	-1	-1	0.544255	0.590025	1	0	-1	0.527984	0.674529	0.50246	0.437223	-1	-1	0.712653	0.480611	-1	-1	0	0.54281	-1	-1	-1
AWC	0.659335	-1	0.378269	-1	-1	0.613678	-1	-1	0.636392	-1	-1	0.865073	-1	0.606734	0.719289	0.718552	-1	0.688946	-1	0.488133	-1	0.64679	0.657764	0.681168	-1	-1	0.494082	0.782253	-1	0.592033	0.510074	0.989751	-1	0.618603	0.583917	0.694917	0.65142	-1	-1	-1	0.730043	0.490171	-1	0.490743	0.725452	0.483635	-1	-1	-1
Anal_muscle	0	0.716752	0.510932	-1	0.293071	0.756697	0.509579	-1	0.621374	-1	0.646446	0.842578	0.520462	0.716195	0.625593	-1	0.732411	-1	-1	-1	-1	0.600205	0.557989	0.597285	0.353872	-1	0.431005	-1	-1	-1	0.334704	-1	-1	-1	0.333618	0.541276	0.480533	-1	-1	-1	0.856232	-1	-1	-1	0.502713	0.462147	0	-1	-1
Apoptotic_germ_cells	0.520265	0.782412	0.567166	-1	0.39122	0.824259	0.682052	0.528289	0.891559	-1	0.905014	0.951286	-1	0.646488	0.632772	-1	0.842741	0.705851	-1	-1	0.697985	0.636551	0.743444	0.846505	0.446384	-1	0.591156	0.696576	0.77084	-1	0.354988	-1	-1	0.625552	0.748368	0.720323	0.620334	0.518259	-1	-1	0.809013	0.600572	-1	-1	0.620533	0.578839	-1	-1	-1
Arcade_cells	0	-1	0.531506	-1	0.568393	0.621753	0.519766	-1	0.573854	-1	-1	0.774484	0.60133	0.617692	-1	0.56648	0.677363	0.571615	-1	-1	-1	0.61244	0.639812	0.53202	-1	0.621516	0.562157	0.481598	0.6144	-1	0.299246	-1	-1	-1	0.713277	0.53441	0.488744	-1	-1	-1	0.667175	0.541769	-1	0.525826	0	0.482597	-1	-1	-1
BAG	0	-1	0	-1	-1	0.590215	0.473855	-1	0.602467	0	0.599859	0.669287	-1	0.647067	0.599703	-1	0.646426	0.693138	-1	-1	-1	0.414876	0.57208	0.643598	-1	-1	0.477553	-1	-1	0.50786	0.535505	0.851069	-1	0.568018	-1	0.635263	-1	-1	-1	-1	0	0	-1	-1	0.387886	-1	-1	-1	-1
BDU	0	0	-1	-1	-1	0.572216	0.410861	-1	0	0.680113	-1	0.721783	-1	0.581765	-1	-1	0.54224	0.659435	-1	0.456857	-1	-1	-1	0.461624	0.443828	0.508271	-1	0.600612	0.545858	0.59922	1	0.719488	0	-1	0.473659	0.574399	0.48909	-1	0.847004	-1	0.603707	0.515826	-1	0	0.449675	-1	0.681077	-1	-1
BWM_anterior	0	-1	0.556846	-1	-1	0.589877	0.392265	-1	-1	-1	-1	0.644261	-1	0.590248	0.591392	-1	0.699754	0.607425	-1	-1	-1	-1	0	0.557008	-1	-1	-1	-1	-1	-1	-1	-1	-1	0	-1	-1	0.41488	-1	-1	-1	0.672349	-1	-1	-1	0	-1	-1	-1	-1
BWM_middle	0	-1	0.532673	-1	-1	0.615044	0	-1	0.610569	-1	0	0.673111	-1	0.548444	0.575515	0.183632	0.751858	0.580806	-1	-1	-1	0.649077	0	0.505014	-1	-1	0.461968	0.537309	0.558321	-1	0.263546	-1	-1	0	-1	-1	0.49783	0	-1	-1	0.726948	0.48313	-1	-1	0	0.365881	-1	-1	-1
BWM_posterior	0	0.828261	0.684556	-1	0.380505	0.891969	0.578895	-1	0.714889	-1	0.738348	0.952558	0.707451	0.823497	0.751473	0.391304	0.83472	0.702066	0.537873	0.608116	0.545249	0.653289	0.697299	0.785731	-1	0.686699	0.705956	0.710529	-1	-1	0.429304	-1	-1	0.59	0.566277	0.690524	0.434342	0.345497	-1	-1	0.904142	0.757055	-1	0	0.711532	0.548848	-1	-1	-1
CAN	0	-1	0.715677	-1	-1	0.780324	0.554131	-1	0.744077	-1	-1	1	-1	0.741665	-1	-1	-1	0.745625	0.622768	0.626259	0.727763	0.602889	0.513509	0.650112	-1	-1	0.546074	-1	-1	-1	-1	0.73719	-1	-1	0.576374	-1	-1	-1	-1	0.609887	-1	0.647549	-1	-1	0	0.453305	0.654905	-1	-1
CEP_ADE_PDE	0.481714	-1	0.530902	-1	-1	0.678831	0.554814	-1	0.604006	0.411274	0.658401	0.840329	0.618752	0.750423	0.693788	-1	0.72494	0.670062	-1	0.33539	-1	0.642427	0.589605	-1	0.683726	0.591129	0.446066	0.710239	0.671492	0.517371	0.62033	0.855213	0.291149	-1	0.544571	0.59958	-1	-1	1	0.456597	0.767835	0.277842	-1	0.561966	0.552177	0.444264	0.613002	-1	-1
CEPsh	0.402907	-1	0.43828	-1	-1	0.527862	0.450642	-1	-1	-1	0.539227	0.615015	-1	0.519956	0.541074	0.341989	-1	-1	-1	-1	0.283437	0.519214	0.424319	-1	0.437577	-1	-1	-1	-1	-1	0.169891	0.364965	-1	0.286534	-1	0.521165	0.379497	-1	0.536623	-1	0.544571	0.407116	0.441256	0	0.53466	-1	-1	0.687914	-1
CEPso	0.587791	0.865796	0.646664	-1	-1	0.84395	0.742297	-1	0.793501	-1	0.703336	0.963233	0.588187	0.871095	0.701362	-1	0.808282	0.728406	0.678513	-1	0.647244	0.622678	0.69893	0.711248	0.702355	0.779045	0.553303	0.731915	0.849332	-1	0.377976	-1	-1	0.670759	-1	0.742842	0.571417	0	-1	-1	0.889971	0.534202	-1	-1	0.68988	0.52735	-1	-1	-1
Coelomocytes	0	-1	-1	-1	-1	0.296113	-1	-1	-1	0.677715	-1	0.769967	0	0.462362	-1	-1	0.675963	-1	0	-1	-1	0.615684	0.685081	0	0.494484	-1	-1	-1	-1	-1	0.340356	0.605319	-1	-1	-1	-1	-1	-1	0.768482	-1	0.756014	-1	0.7791	-1	0.296113	0.384833	0.865192	-1	-1
DA_VA	0.172709	0.539227	0	-1	-1	0.617864	0.368495	-1	0.424869	-1	0.485801	0.713255	0.543563	0.590835	0.644071	-1	0.643767	0.589982	0.364465	0.497698	-1	0.585183	0.45443	0.500262	0.402153	-1	0.403551	0.690664	0.569153	0.571771	1	0.82478	-1	0.499962	0.501919	0.511777	0.416005	-1	0.819455	0.368206	0.595151	0.602032	0.539139	0.539864	0.448894	0.437128	0.649931	-1	-1
DB_VB	0	-1	0.47179	-1	-1	0.527712	0.402795	-1	0.412126	0.563507	0.554147	0.700831	0.61279	0.669289	0.670907	-1	0.664184	0.652057	0.446342	0.435651	-1	0.513796	0.479573	0.417964	0.41466	-1	0.454216	-1	-1	0.564731	1	0.863441	-1	-1	0.503905	0.508303	0.408981	0.257778	0.839131	-1	0.623856	0.621856	0.462978	0.60496	0.42391	0.43634	0.720238	-1	-1
DVA	0	-1	0	-1	-1	0.614562	0.499902	-1	-1	-1	0.556255	0.782674	-1	0.643947	-1	-1	-1	-1	-1	0.465101	-1	-1	-1	0.553476	0.497827	-1	-1	-1	-1	-1	-1	-1	-1	0.664958	-1	0.749541	0.546951	-1	-1	-1	0	0.565091	-1	0	0	-1	-1	-1	-1
DVB	-1	-1	-1	-1	-1	0.596959	0.541476	-1	0.629961	0	0.744178	0.92137	-1	0.782968	-1	-1	-1	0.715926	0	0.408226	-1	-1	0.587242	0.677013	0.474328	-1	-1	-1	-1	-1	-1	0.917619	-1	-1	-1	-1	-1	0	-1	0.545065	0.797022	0.566639	0.664043	0	0.529493	0.598421	0.924095	-1	-1
DVC	-1	0.637256	0	-1	-1	0.713893	-1	-1	-1	-1	0.668283	0.812671	-1	0.780832	-1	-1	0.774729	-1	0.55041	0.582959	-1	-1	-1	-1	-1	-1	0.591826	0.688166	-1	-1	-1	-1	-1	-1	0.550135	0.705082	-1	-1	1	0.527127	0.655738	0.504554	-1	0.546424	0.641388	0.629235	0.65235	-1	-1
Differentiated_germ_cells	0.535618	0.815726	0.65874	-1	0.368884	0.71505	0.703695	0.64767	0.859295	-1	0.863393	1	-1	0.674892	0.671312	-1	0.830428	0.659787	-1	-1	0.675103	0.596128	0.698798	0.7399	0.403304	-1	0.585655	0.755997	-1	-1	0.283256	-1	-1	0.693769	0.611966	0.6617	0.622309	0.342034	-1	-1	0.943027	0.522418	-1	-1	0.607764	0.518573	-1	-1	-1
Distal_tip_cell	0	0.629021	0	-1	-1	0.891186	0.448278	-1	0.60076	0.715377	0.545408	0.829189	0.960332	0.838427	0.629812	-1	0.673892	0.819037	0.579785	-1	-1	0.566468	0.673431	0.581843	0.494087	0.526327	0.500621	0.594527	0.673987	-1	0.292775	0.915625	-1	0.645422	0.549728	0.773582	0.570911	0	0.83593	0.556066	0.675738	0.680081	0.556066	0	0.511593	0.564727	0.70284	-1	-1
Dorsal_uterine_cell	0	0.80009	0.617611	0.606488	0.263836	0.560924	0.492331	-1	0.681101	0.436669	0.694179	0.938935	0.526921	0.469795	0.583444	-1	0.787961	0.761244	0.578157	-1	-1	0	0.586894	-1	0.631905	0.541666	0.533664	0.628158	0.613574	-1	0.353946	0.445234	-1	-1	0.439933	0.445727	0	0	1	0.493448	0.871579	0.59091	0.618309	0	0.631197	0.509667	0.535509	-1	-1
Embryonic_cells	0.44645	0.556572	0.40406	-1	-1	0.65537	0.514439	0.366721	0.618523	0.612609	0.997395	0.718788	0.474958	0.506194	0.464084	0.631184	0.688345	0.50014	0.447353	0.438579	0.484034	0.456084	0.509738	0.610378	0.386512	0.466809	0.554029	0.567528	-1	-1	0.28816	0.623496	0.666154	0.588166	0.428951	0.594581	0.375938	0.463968	0.803148	-1	0.715816	0.464661	0.507766	-1	0.638548	0.461904	0.331752	-1	-1
Excretory_cells	0.588593	0.792512	0.554188	-1	-1	0.7812	0.658716	-1	0.877914	-1	0.706387	0.900406	0.604426	0.775254	0.652101	-1	0.788281	0.710687	0.694175	-1	0.660029	0.751638	0.619289	0.631856	0.746764	0.709407	0.489807	0.626442	0.738551	-1	-1	0.50073	-1	0.651742	0.585094	-1	0.601134	0.342689	-1	-1	0.910455	-1	-1	-1	0.574291	0.60103	-1	-1	-1
Excretory_duct	0.438088	0.70719	0.50881	-1	-1	0.862171	0.580213	-1	0.564454	-1	0.63419	0.782632	0.621701	0.705519	0.67281	0.388366	0.604012	-1	-1	0.663445	-1	0.613614	0.606463	0.800193	0.408433	0.59593	0.52966	0.609742	0.756238	-1	0	0.604331	-1	0.629988	0.60968	0.681301	0.368602	0	-1	-1	0.755521	-1	0.599597	0.432096	0.603741	0.473765	-1	-1	-1
Excretory_gland	0	-1	0.717949	-1	-1	0.895246	0.617006	-1	0.828168	-1	0.747017	0.94752	0.655274	0.81948	0.65565	-1	0.821759	0.637982	0.632018	-1	0.496959	-1	0.59678	0.726292	0.410351	0.635127	0.586845	-1	-1	-1	0.279693	-1	-1	0.640552	0.529873	0.640632	0.675071	-1	-1	-1	1	0.468816	0.466738	-1	0.648914	0.580728	-1	-1	-1
GLR	0	-1	0.51921	-1	-1	0.736247	0.49164	-1	0.780005	0.603211	0.648901	0.89411	0.787637	0.686537	0.708832	-1	0.92796	0.66733	0.646949	0.462062	-1	0	0.61017	0.525311	0.657473	-1	0.508279	0.751358	0.687477	-1	0.584715	1	-1	0.607341	-1	0.494899	0.964909	0	0.885791	0.493334	0.83156	0.619322	0.822749	0.577364	0.550231	0.478889	0.663534	-1	-1
Glia_1	0.393079	-1	0.6205	-1	0.286534	0.688092	0.647923	-1	0.686517	0.801078	0.739276	0.870776	-1	0.769514	0.600333	-1	0.705483	0.647623	0.632266	-1	-1	0	0.673584	0.640115	0.521052	-1	0.793396	-1	0.764423	-1	0.292775	0.404671	-1	0.591806	0.430521	0.793681	0.518676	0	1	-1	0.833154	0.84197	0.593414	0.461261	0.53433	0.535157	-1	0.765954	-1
Glia_2	0.492912	0	0.537654	-1	-1	0.53838	0.585054	-1	0.732383	-1	0.703829	0.826715	0	0.620824	-1	-1	0.57309	0.624416	-1	-1	-1	-1	0.419158	0.678077	-1	-1	0.839779	0.682625	-1	-1	0.275434	0.383725	-1	0.500893	0.313353	0.859004	-1	-1	0.858142	-1	0.480339	-1	0.56873	-1	0.745617	0.540637	-1	0.972025	-1
Glia_3	0	-1	0	-1	-1	0.611402	0.381627	-1	0	-1	0.649784	0.67134	-1	0.537019	0.687966	0.350396	0.477707	-1	0.626208	-1	0.501658	0.414071	0	-1	0.31354	-1	0.542376	0.474516	0.317316	-1	0.219946	0.390652	-1	0.511324	0.42379	0.697338	0.398598	-1	0.722859	-1	0.630764	0.741521	0.37805	-1	0.699049	0.446104	-1	0.834479	0.468536
Glia_4	-1	-1	0.518796	-1	-1	0.576387	-1	0	0.578778	-1	0.562023	0.705906	-1	0.566261	0.452906	-1	-1	-1	-1	-1	-1	-1	-1	0.502253	0.271926	-1	-1	-1	-1	-1	0.465982	-1	-1	0.445461	0.448036	-1	0.420482	0.238136	-1	-1	0.59798	0.393027	-1	-1	0.426629	0.383739	-1	-1	-1
Gonadal_sheath	0.346742	0.704771	0.483751	-1	0.269509	0.828298	0.522218	-1	0.619665	-1	0.629709	0.761062	-1	0.620752	0.643071	-1	0.633493	0.59051	0.484182	-1	-1	0	0.577238	0.602236	-1	-1	-1	0.544325	0.738923	-1	0.296672	-1	-1	-1	-1	-1	0.500482	-1	-1	-1	0.703064	0.514006	-1	-1	0.578303	0.426192	-1	-1	-1
HSN	0.557569	0.613326	0	-1	-1	0.475052	0.478317	-1	-1	0.371305	0.764977	0.79707	0.588699	0.659612	0	0.495289	0.645661	0.721212	0	0	-1	0.788961	0.582554	0.596499	0.464765	0.574205	0.520724	-1	-1	0.660666	0.0824287	0.726903	0.43419	-1	0.448214	0.709929	0.560874	0	0.988936	0.443689	0.739614	0.560104	0.584037	-1	0.515459	0.519479	0.737301	-1	-1
Hypodermis_head	0	-1	0.568085	-1	0.372928	0.835846	0	0.465134	0.627451	-1	0.645231	0.865972	-1	0.618991	0.723743	0.212371	0.633237	-1	0.674294	0.839183	0.442691	-1	0	0.662303	0.481046	0.576257	0.612176	-1	-1	-1	-1	0.538222	-1	-1	-1	0.799696	0.455763	0	-1	-1	0.784079	0.749892	0.409196	-1	0.740034	0.43719	-1	-1	0.436853
Hypodermis_tail	0.558322	0.602623	0.532711	-1	-1	0.806882	0.47671	-1	-1	-1	0.493524	0.650336	-1	0.475503	-1	-1	0.570264	-1	-1	-1	0.569172	0.5766	-1	0.525629	-1	-1	-1	-1	-1	-1	0.325643	-1	-1	-1	-1	-1	-1	-1	-1	0.402741	0.542104	0.584965	-1	-1	0.619585	0.330775	-1	-1	-1
I1	-1	0.742495	0.526313	-1	-1	0.746033	-1	-1	0.697064	-1	0.711953	0.913287	-1	0.847901	-1	-1	0.787804	-1	-1	-1	-1	0.657576	0.665956	-1	-1	-1	0.62551	-1	-1	0.615823	0.496872	0.904675	-1	-1	0.603009	0.723449	0.730396	-1	1	-1	0.769487	-1	-1	-1	0.615208	0.498909	0.682701	-1	-1
I2	0.774366	0.712247	-1	-1	-1	0.825356	0.593088	-1	0.747483	-1	-1	0.99422	-1	0.986251	-1	0.689914	-1	0.886858	0.639422	0.373964	-1	0.742053	-1	0.694089	0.558057	-1	0.610144	-1	-1	0.526643	-1	-1	-1	-1	-1	0.773141	-1	0	-1	-1	0.835875	0.90563	0.825624	0.622955	0.621335	-1	0.790209	-1	1
I4	0.757867	-1	-1	-1	-1	0.674013	0.545974	-1	0.52933	0	-1	0.940453	-1	0.584567	0.579648	-1	0.898344	-1	-1	0.545179	-1	-1	-1	-1	-1	-1	-1	-1	-1	0.456357	0.4067	-1	-1	-1	-1	0.880667	0.615088	-1	-1	0.430017	0.754051	0.554978	-1	-1	0	-1	0.930813	-1	-1
I5	0	-1	-1	-1	-1	0.578402	0.49459	-1	0.632614	-1	0.685256	0.901685	0.460279	0.572757	-1	-1	0.850795	-1	-1	0.52564	-1	0	0.540225	0.611484	-1	-1	-1	-1	-1	0	-1	0.913545	-1	-1	0.481244	0.83306	-1	-1	0.906912	-1	-1	0	-1	0	0.355974	0.443685	0.845935	-1	-1
IL1	-1	0.613059	-1	-1	-1	0.710763	-1	-1	0.542098	0.372982	0.662159	0.85791	0.633335	0.765626	0.751528	-1	0.883312	0.679851	-1	0.498272	-1	0.635468	0.589857	0.54811	0.453817	-1	0.43534	-1	-1	0.548728	-1	1	-1	-1	-1	0.632919	-1	0	0.998976	0.433757	0.561289	0.515771	0.734143	0.515428	0.541099	-1	0.616127	-1	0.952933
IL2	0	-1	0.966703	-1	0.292655	0.668189	0.481544	-1	0.660108	0.693263	0.576466	0.799688	0.661619	0.669808	0.620719	0.448237	0.589231	0.611581	0.373909	0.372363	0.621237	0.570567	0.591598	0.664108	-1	-1	0.398014	0.804142	0.6209	0.499912	0.781619	0.821065	-1	-1	0.517904	0.801833	-1	-1	-1	0.41912	0.742524	0.793227	0.758137	0.464699	0.533301	0.505461	0.648406	-1	-1
Intestinal_rectal_valve	0.439811	0.680557	0.554276	-1	0.417402	0.891266	0.543539	-1	0.511105	-1	0.643199	0.791466	-1	0.793787	0.552293	0.562243	0.612069	0.692277	0.608351	0.603762	0.496064	0.663908	0.618164	0.593237	0.322358	0.65404	0.645868	0.582767	0.693193	-1	0	0.319074	-1	0.648652	0.503158	0.625001	0.358565	0.257051	0.748819	0.524157	0.628665	0.574076	0.584862	0.514344	0.539758	0.445705	-1	-1	-1
Intestine_anterior	0.304024	0.671008	0.467308	-1	0.435299	0.743716	0.521985	-1	0.512083	0.777926	0.597874	0.720597	0.647335	0.796875	0.579425	0.603407	0.555808	0.689031	0.567722	0.532738	-1	0.712533	0.680272	0.574435	0.335786	0.614873	0.537591	0.518473	0.764378	-1	0.179171	0.21806	-1	0.587955	0.456635	0.634602	0.290747	0	0.618331	0.517339	0.616651	0.661037	0.358342	0.521187	0.588592	0.459118	-1	-1	-1
Intestine_anterior_cat4_ptps1	0.480748	0.657169	0.569649	-1	0.42699	0.791951	0.575946	-1	0.620416	-1	0.63324	0.783468	0.58238	0.955649	0.551057	-1	0.729492	0.637427	-1	-1	0.65543	0.588151	0.577613	0.577411	0.495672	0.669385	0.538557	-1	0.881456	-1	0.233823	0.407178	-1	0.543409	0.580324	0.748907	0.496011	-1	-1	-1	0.761905	0.674485	0.491188	-1	0.540235	0.642152	-1	-1	-1
Intestine_middle	0.706383	-1	0.708451	-1	-1	0.840774	0.660785	-1	0.741839	-1	0.735571	0.855994	-1	0.977049	0.655585	-1	0.754288	0.768864	-1	-1	0.5476	0.767077	0.65065	0.724442	-1	-1	0.647325	-1	-1	-1	0.263448	-1	-1	-1	0.586061	0.795759	0.470585	-1	-1	-1	0.817181	0.687939	0.562522	-1	0.588623	0.639038	-1	-1	-1
Intestine_posterior	0.480116	-1	0.568623	-1	0.312789	0.748644	0.527911	-1	0.541605	0.636603	0.640346	0.735617	0.657509	0.793691	-1	0.535284	0.605844	0.734625	0.513389	0.559195	-1	0.726662	0.698744	0.592915	0.304038	0.614785	0.486477	0.54594	0.808502	-1	0.307931	0.395427	-1	0.604404	0.466817	0.645985	0.311608	0	0.494945	0.510974	0.709047	0.699306	0.474363	-1	0.590344	0.454146	-1	-1	-1
LUA	-1	0.778002	0	-1	-1	0.68378	0.613285	-1	-1	-1	-1	1	-1	0.78263	-1	-1	0.868004	-1	0.641059	-1	-1	-1	0.563674	-1	0.535129	-1	0.469449	-1	-1	0.654266	-1	-1	-1	0.645211	-1	-1	-1	0	-1	-1	-1	-1	0.811956	0	0	0.497086	-1	-1	-1
M1	-1	0	-1	-1	-1	0.67348	0	-1	-1	-1	-1	0.913458	-1	0.648398	0	0	-1	-1	-1	-1	-1	0	0	0	0.477073	-1	-1	-1	0.49088	0	0.414125	0.562522	-1	-1	0	0.786297	0.57495	-1	-1	0.441242	0.731941	0	0.502479	0	0	0.406603	0.712338	-1	0.956913
M2	-1	0.724527	-1	-1	0.414341	0.70835	-1	-1	-1	0.686964	0.656466	0.957965	0.522175	0.689339	0.59204	-1	1	-1	0.514285	0.459608	-1	0.667133	0.581911	0.626774	0.497282	0.56622	-1	-1	0.722622	0.623408	0.556584	0.762735	-1	-1	0.482013	0.696141	0.491283	0	-1	-1	0.779128	-1	0.723558	0.553218	0.624437	0.480536	0.688566	-1	-1
M3	0.565749	0.633818	0.51828	-1	-1	0.705762	0.519846	-1	0.634526	0	-1	0.920379	0.550693	0.736789	0.65477	-1	-1	-1	-1	-1	-1	0.64618	0.584501	0.658487	-1	-1	-1	-1	-1	0.554427	0.634024	0.82167	0.486145	-1	0.540753	0.643188	0.618974	-1	1	-1	-1	-1	0.644	0.557353	0.563392	0.472833	0.652253	-1	-1
M4	0.677611	0.750133	-1	-1	-1	0.566315	-1	-1	-1	-1	0.653255	0.847682	-1	0.648286	0.67922	-1	0.930313	0.590668	0.528016	-1	-1	0.708594	-1	-1	0.479005	-1	0.401813	-1	-1	0.662668	0.354824	-1	-1	0.616835	-1	0.793378	0.596989	-1	-1	-1	0.678449	-1	-1	0	0.679398	0.399469	-1	-1	-1
M5	0.398077	-1	0.531143	-1	-1	0.694206	-1	-1	0.685185	-1	0.742202	0.943091	0.609249	0.862144	0.74463	-1	1	0.655867	0.628534	0.315496	-1	0.729581	0.639705	0.689187	0.53188	-1	-1	0.797282	0.807919	0.50621	0.671448	0.862993	0	-1	0.54161	0.799591	-1	-1	0.97738	0.472878	0.701368	0.473265	-1	0.60592	0.588932	0.537622	0.734035	-1	-1
MI	0	-1	-1	-1	-1	0.716208	-1	-1	0.729219	-1	-1	0.990747	0.60045	0.756499	-1	-1	0.935677	0.749525	0.541312	-1	-1	0.627919	0.61312	-1	0.442921	-1	0.384853	0.700748	-1	-1	-1	0.917011	-1	0.663898	0.51736	0.786154	0.634748	0	-1	0.500146	0.756601	0.478161	-1	-1	0.538207	0.511071	-1	-1	-1
Marginal_cell	0.526418	0.72788	0.487932	-1	-1	0.636336	0.531189	-1	0.69169	0.642815	-1	0.94988	-1	0.698919	0.692561	0.621726	-1	-1	-1	-1	0.446251	0.631673	0.650865	0.538294	-1	0.612586	0.441149	-1	-1	-1	-1	0.70475	0.365396	-1	-1	0.466801	0.545522	-1	0.726815	-1	0.720939	0.495951	0.622611	0.587889	0.486375	0.429617	-1	-1	-1
Mature_sperm	-1	-1	-1	-1	-1	0.537861	-1	1	-1	-1	-1	-1	-1	-1	0.792149	-1	-1	-1	-1	-1	-1	-1	-1	-1	-1	-1	-1	-1	-1	-1	-1	-1	-1	-1	-1	-1	-1	-1	-1	-1	-1	-1	-1	-1	0	-1	-1	-1	-1
Meiotic_germ_cells	0.535642	0.784983	0.598406	-1	0.354343	0.645732	0.696393	0.477805	0.909558	-1	0.864765	1	-1	0.487218	0.677175	-1	0.850904	0.635434	-1	-1	0.708233	0.607503	0.716895	0.763129	0.416134	-1	0.565069	0.740293	0.64504	-1	0.315836	-1	-1	0.726875	0.701745	0.568211	0.59671	0.487565	-1	-1	0.926018	0.519531	-1	-1	0.657797	0.587839	-1	-1	-1
Mitotic_germ_cells	0.529781	0.817124	0.621758	-1	0.416998	0.443843	0.720674	0.528375	0.891445	-1	0.971036	1	-1	0.362512	0.680843	-1	0.831401	0.66099	-1	-1	0.701141	0.57029	0.696548	0.758483	0.451991	-1	0.605527	0.734287	0.554332	-1	0.266646	-1	-1	0.690689	0.63126	0.42944	0.571784	0.318341	-1	-1	0.972074	0.494055	-1	-1	0.620429	0.568458	-1	-1	-1
NSM	-1	-1	-1	-1	-1	0.76259	-1	-1	-1	0	-1	-1	0.639412	-1	0.688326	-1	-1	-1	0.575692	-1	0.56722	-1	-1	-1	0.58892	-1	-1	-1	-1	0.666224	-1	-1	-1	-1	-1	0.64559	0.651092	-1	1	-1	-1	0.541037	-1	0.616663	0.559127	0.510498	0.654303	-1	-1
OLL	0.58971	-1	-1	-1	-1	0.681837	0.554946	-1	0.546381	-1	0.557789	0.803527	-1	0.782552	-1	-1	-1	0.741215	-1	0.542492	-1	-1	0.569088	-1	-1	-1	-1	-1	-1	0.595328	-1	1	-1	0.559974	0.573426	0.600558	-1	-1	-1	-1	0.770489	-1	-1	0.455282	0.578547	0.434261	0.543078	-1	0.946728
OLQ	0.58253	0.670648	0.556879	-1	-1	0.706283	0.542564	-1	0.769869	0.466916	0.708865	0.846648	0.698551	0.830133	0.775377	-1	-1	0.758193	-1	0.554408	-1	0.572771	0.583658	0.68453	0.391547	-1	0.454324	0.798973	-1	0.542427	0.169515	1	-1	-1	0.555567	0.589913	0.579931	-1	-1	0.48395	0.956417	0.43305	0.577242	0.651995	0.609702	0.494542	0.601842	-1	-1
Oocytes	0.516017	0.763316	0.700559	-1	0.401448	0.770218	0.61337	0.63137	0.837524	0.642929	0.952433	0.922452	0.588531	0.653089	0.658356	0.521487	0.8089	0.687441	0.50169	-1	0.628391	0.679053	0.76309	0.769621	0.371193	-1	0.676322	0.713648	0.709802	-1	0.317787	0.603614	0.642341	0.633114	0.644829	0.677784	0.609302	0.635144	-1	0.663888	0.839876	0.496815	0.540771	-1	0.579875	0.507656	-1	-1	-1
PDA	0.447228	-1	-1	-1	-1	0.745575	0.542279	-1	0.651389	-1	-1	0.854446	-1	0.746814	-1	-1	0.825388	-1	0.551003	-1	-1	0.711009	0.577073	-1	-1	-1	-1	0.765647	-1	0.552933	-1	0.923167	-1	-1	-1	0.768271	-1	-1	1	-1	-1	0.499874	-1	0.555465	0.584318	0.50784	0.776626	-1	-1
PDB	-1	0.669651	0.583614	-1	-1	0.8072	-1	-1	-1	0.714672	-1	-1	-1	-1	-1	-1	-1	-1	-1	0.532673	-1	-1	0.621865	-1	-1	-1	-1	-1	-1	0.677179	1	0.988294	-1	-1	-1	0.703195	-1	-1	-1	-1	0.692689	-1	0.727393	0.747205	0.576548	0.581985	0.98046	-1	-1
PHA_PHB	0.35655	0.658226	-1	-1	-1	0.585095	0.493422	-1	-1	-1	0.666914	0.858266	0.599537	0.635989	0.606892	0.611385	0.700196	-1	0.516404	0.460393	-1	0.574759	0.563705	-1	0.498698	-1	0.52819	0.754338	-1	0.527314	0.932058	0.788169	0.388735	-1	-1	0.619691	0.480154	0.366717	1	0.499924	0.721713	0.513502	0.596447	0.491921	0.555279	0.465518	0.575315	-1	-1
PHC	-1	0.639331	-1	-1	-1	0.70889	-1	-1	-1	-1	-1	-1	-1	-1	-1	-1	-1	-1	0.545545	-1	-1	-1	-1	-1	0.769045	-1	-1	-1	-1	-1	-1	-1	0.405682	-1	-1	0.614566	-1	-1	1	-1	0.662439	-1	-1	-1	0.576151	0.557761	-1	-1	-1
PHsh	0.579047	1	0.620352	-1	-1	0.849746	0.581916	-1	0.586152	-1	-1	0.778503	0.514624	0.565148	0.675586	-1	0.606283	-1	-1	-1	0.481035	0.602751	0.539601	0.458529	-1	0.468079	-1	-1	-1	-1	-1	0.566231	-1	0.579967	-1	-1	0.483831	-1	0.845606	0.518768	0.669051	0.516238	-1	0.583533	0.673372	0.414868	0.5247	-1	-1
PHso	0.379576	0.454126	0.409636	-1	-1	0.557877	0.388104	-1	0.456953	-1	0.57652	0.605673	-1	0.558375	0.627656	-1	0.469745	0.480559	0.502198	-1	0.486292	0.400629	0.401169	0.502105	0.295546	-1	0.44971	0.493436	-1	-1	0	0.303652	-1	0.383906	0.329958	0.586967	0.324057	0	0.646019	-1	0.536484	0.528761	0.370385	-1	0.673181	0.327511	0.533229	-1	-1
PLM_ALM	0	-1	0.65339	-1	-1	0.574298	0.349841	-1	0.497844	0.668937	-1	0.661182	1	0.518934	0.515033	-1	0.489463	0.557943	0.595843	0.338824	-1	0.496414	0.328469	0.501124	-1	-1	0.304889	0.657035	-1	0.418094	0.254933	0.560567	-1	0.412339	0.482276	0.633168	0.825063	-1	0.7636	0.300254	0.811075	0.407051	-1	0.817526	0.440011	0.347268	0.507604	-1	-1
PLN	0.367597	-1	-1	-1	-1	0.823695	0.646561	-1	-1	-1	0.84439	0.915725	0.940407	0.867339	-1	-1	0.797892	-1	0.54819	0.354326	-1	0.739673	0.682124	-1	0.492489	-1	0.67674	0.863964	-1	-1	0.186502	1	-1	-1	-1	0.788754	-1	0.457041	-1	-1	0.66909	0.775759	-1	0.721561	0.626602	0.55081	0.834503	-1	-1
PVC	0.452222	-1	0.616369	-1	-1	0.632159	0.549691	-1	0.614758	-1	-1	0.876914	0.497213	0.636476	-1	-1	-1	-1	0	0.275925	-1	0.639233	0.559458	-1	-1	-1	0.657359	-1	0.66326	-1	0.779315	0.710962	0.400255	-1	-1	0.575422	-1	0	1	0.455284	0.72709	0.514811	-1	0.690992	0.547276	0.67444	0.561832	-1	-1
PVD_FLP	0.306504	-1	0	-1	-1	0.554807	0.462456	-1	0	0.66295	-1	0.659183	0.791375	0.486057	0.659794	0.492448	0.498958	0.558515	0	0.380275	-1	0.500276	0.488437	0.5072	-1	0.586052	-1	0.613237	-1	0.432261	0.589505	0.584152	-1	-1	0	0.582451	-1	-1	0.7679	0.425654	0.607689	0.297751	0.515194	0.574551	0.446864	0.492487	0.486661	-1	-1
PVM	0	-1	0.689086	-1	-1	0.617175	0.422172	-1	0.556323	0	-1	-1	-1	0.570755	0.515364	-1	0.560935	-1	0.281233	-1	-1	-1	0.831382	0.667356	0.362419	-1	0.374569	-1	-1	0.516706	0	0.765524	-1	-1	-1	0.714718	-1	-1	0.88381	0.442105	0.867812	0.469764	-1	0.747261	0	0.449441	0.487079	-1	-1
PVN	-1	-1	-1	-1	-1	0.699095	0.547205	-1	0.619807	-1	-1	0.903068	-1	0.741108	-1	-1	-1	-1	-1	0.562896	-1	0.678496	0.736591	-1	-1	-1	-1	-1	-1	-1	0.852018	1	-1	-1	-1	0.633876	-1	-1	-1	-1	0.720066	0.37879	-1	0.638116	0.695222	-1	-1	-1	-1
PVP	0.8227	0.648482	0	-1	-1	0.717612	0.614041	-1	-1	-1	-1	0.927196	-1	0.799577	0.771997	0.811577	0.797181	-1	-1	0.610547	-1	0.610304	0.597775	0.623447	-1	-1	0.73194	-1	-1	0.604755	0	0.813695	-1	-1	-1	0.631345	-1	0	-1	0.500329	0.74655	0.503888	-1	0.700263	0	0.697081	0.697567	-1	-1
PVQ	0.484576	-1	-1	-1	-1	0.627574	0.546606	-1	0.66435	-1	0.677431	-1	-1	0.57844	-1	-1	-1	-1	0.447771	-1	-1	0.476554	-1	-1	-1	-1	0.440598	0.628747	-1	-1	0.881895	-1	-1	-1	-1	0.577557	0.488537	-1	1	0.497071	0.677762	0.536134	0.529007	0.552758	0.498202	0.50559	0.622158	-1	-1
PVR	0.459922	-1	-1	-1	0.61653	0.678782	-1	-1	-1	-1	-1	0.929839	-1	0.821727	0.787382	-1	0.883495	0.889545	0	0.500066	-1	0.781494	-1	0.711937	0.502481	-1	-1	-1	-1	-1	-1	0.943091	-1	-1	0.661178	-1	0.555973	-1	-1	0.667598	-1	0.808695	0.612539	0.712389	0.631938	0.752679	0.784895	-1	-1
PVT	-1	-1	-1	-1	-1	0.690598	-1	-1	-1	-1	0.686552	1	0.600016	-1	-1	-1	-1	0.773285	0.563378	0.477212	-1	-1	-1	0.635069	-1	-1	0.483123	-1	-1	-1	0.819226	-1	-1	-1	0.640694	0.770573	-1	-1	0.932443	-1	0.599889	-1	-1	0	0	0.529348	0.724525	-1	-1
PVW	0	-1	-1	0.337786	-1	0.689257	0.503469	-1	0.571456	-1	-1	0.797496	0.599943	0.687358	0.663117	-1	-1	0.649228	0.502772	0.540305	-1	0.575226	-1	0.63044	0.407308	0.593956	0.638718	-1	-1	0.652775	0.37479	0.794119	-1	0.693305	-1	0.619183	0.469948	-1	1	-1	0.624378	0.533722	-1	0.743491	0.553237	0.565601	0.652908	-1	-1
RIA	0.61054	0.621058	0.477246	-1	-1	0.572179	0.542505	-1	-1	-1	0.579247	0.770435	0.491158	0.677247	0.713806	0.531371	0.773745	0.652878	0.554768	0.398451	-1	0.594415	0.570207	0.475973	-1	-1	0.370057	-1	0.583686	0.56219	0.561447	0.960758	0.425977	-1	0.520789	0.506356	0.540878	0.414438	0.898084	0.474986	0.633038	0.326132	-1	-1	0.516647	-1	0.623275	-1	1
RIB	0.510449	-1	0.576614	-1	-1	0.678173	0.521839	-1	-1	-1	0.696886	0.812131	-1	0.76776	-1	-1	0.737014	-1	0	0.573477	-1	-1	0.574383	0.544965	-1	-1	0.494402	0.860679	0.667584	-1	0.668543	1	-1	-1	-1	0.742353	0.520279	-1	0.959504	-1	0.684074	-1	-1	0	0.599761	0.453456	0.799454	-1	0.941122
RIC	0.611372	0.661418	-1	-1	-1	0.650974	-1	-1	-1	-1	0.683168	0.884413	0.599297	0.693352	0.747372	-1	0.675742	0.7184	0.336174	0.512969	-1	0.582026	-1	0.669511	-1	-1	0.402507	-1	0.677434	-1	-1	0.961298	-1	-1	0.521624	0.758801	-1	-1	-1	0.515007	0.628317	0.742587	0.529452	-1	0.569481	0.517925	-1	-1	-1
RID	0	-1	-1	-1	0.378008	0.470484	0.148973	-1	0	-1	0	0.7029	-1	0.573673	0	0.458741	0.644872	-1	-1	-1	-1	0	0	0	-1	-1	0.48538	0	0.529773	-1	0.968393	0.656423	-1	0.346883	0	0.545442	-1	-1	-1	-1	0.59286	0.636557	-1	0	0	0.398649	0.453929	-1	0.652485
RIF	-1	-1	0.496352	-1	-1	0.563247	-1	-1	0.535642	0	0.562618	0.719233	-1	0.651434	0.629983	-1	0.733487	0.668749	-1	0.461416	-1	-1	-1	-1	-1	-1	-1	-1	-1	0.567441	1	0.868623	-1	-1	0.710468	0.633464	-1	0.336667	0.847598	0.425616	0.586798	0.658554	-1	-1	0.497775	0.582795	0.607218	-1	-1
RIG	0	-1	-1	0	-1	0.496048	0.335399	-1	0.459198	-1	-1	0.643507	-1	0.51487	0	-1	0.618399	0.614991	-1	0	-1	-1	0.410538	0.448332	0.351081	-1	-1	-1	-1	0.578873	1	0.923825	-1	-1	-1	0.513188	0.473473	-1	0.704766	0.323703	-1	0.645702	0.367031	-1	-1	0	0.596468	-1	-1
RIH	0.453761	-1	-1	-1	-1	0.687358	-1	-1	0.667563	-1	0.6774	-1	-1	0.793383	0.711643	-1	0.797822	0.712896	0.536121	0.544097	-1	-1	0.67903	0.605439	0.545978	-1	-1	0.751856	-1	0.474222	-1	1	0.3979	-1	0.538738	0.720158	0.563054	-1	0.961453	-1	-1	0.437691	-1	-1	0.581832	0.471127	0.708587	-1	-1
RIM	0	-1	-1	0.299098	-1	0.540253	0.498765	-1	0.558467	-1	-1	0.790157	-1	0.705473	-1	-1	-1	-1	0.486597	0.591328	-1	0.605739	0.647226	0.662607	-1	-1	0.456791	-1	-1	0.592629	0.837445	1	-1	-1	0.543165	0.635092	-1	0.436636	0.898821	-1	-1	0.583949	-1	0.453949	0.495532	0.481416	-1	0.719251	-1
RIP	0.567662	-1	-1	-1	-1	0.673173	0.577181	-1	-1	-1	0.718133	0.855359	0.593523	0.763754	-1	-1	-1	-1	0.58615	-1	-1	-1	0.566363	0.635306	-1	-1	0.341461	0.764521	-1	0.346538	0.357591	0.923925	-1	-1	0.596372	0.730554	0.620901	-1	-1	-1	0.812756	0.492033	0.570297	-1	0.509265	-1	0.722585	0.901079	-1
RIR	0.467075	0.598119	0.452566	-1	-1	0.63213	0.440819	-1	0.535444	0.415051	0.654447	0.841779	-1	0.663085	0.72827	-1	0.857094	0.623613	0.550494	-1	-1	-1	0.565261	0.675959	-1	-1	0.529816	0.669102	-1	0.549337	0.454784	1	0	-1	0.530712	0.686962	0.456082	0	0.928641	0.593324	0.609248	0.355536	-1	-1	0.575465	0.463115	0.653041	-1	-1
RIS	0.650467	-1	0	-1	-1	0.614511	0.453777	-1	0	-1	0.662879	0.88406	-1	0.662095	0.77416	-1	-1	-1	-1	0.401952	-1	0	0	-1	-1	0.584436	0.497091	0.661911	-1	0.421449	0.442849	0.992037	0	-1	-1	0.841462	0.616002	-1	1	-1	0.737759	0.535132	-1	-1	0	0.474138	-1	-1	-1
RIV	0	0	-1	-1	-1	0.684835	0.584916	-1	-1	0.570627	-1	0.850107	0.547711	0.748091	0.685587	0.568933	0.742547	-1	-1	0	-1	0.659979	0.615688	0.607364	0.527261	0.562145	0.390178	-1	-1	-1	-1	0.888125	-1	0.539728	-1	0.693154	-1	-1	-1	-1	0.675131	0.373776	0.654422	0.598547	0.605564	-1	0.70036	-1	-1
RMD	0.470677	-1	-1	-1	-1	0.580623	0.476054	-1	0.555557	0	0.556918	0.780366	-1	0.759905	0.714371	-1	0.809534	0.665714	0.501805	0.526041	-1	0.620317	0.508648	0.516704	0.44611	0.51708	0.459038	0.826043	-1	-1	1	0.985032	0.411321	0.550604	0.465268	0.511526	0.485152	-1	0.911627	0.514943	0.671269	0.6042	0.721456	-1	0.506624	0.428668	0.624707	-1	0.963896
RMD_LR	0	0	-1	-1	-1	0.621651	0.488852	-1	0.572021	0.574201	0.567916	0.887038	0.606117	0.694444	0.753299	-1	-1	0.764876	0.859808	0	-1	-1	-1	0.634564	0.377373	0.532497	0.449857	-1	-1	0.546793	0.710706	1	-1	-1	0.492744	0.671681	0.521862	0.380376	0.94979	-1	0.718863	0.555098	0.741872	-1	0.558032	0.475925	0.64801	-1	-1
RME	0	-1	0.517917	-1	-1	0.647197	0.562459	-1	-1	-1	0.660082	0.808042	0.916655	-1	0.733099	-1	-1	-1	-1	-1	-1	-1	-1	0.498571	-1	-1	-1	-1	-1	0.626517	0.509249	0.959133	0.473306	-1	-1	0.697279	-1	-1	-1	-1	0.689557	0.470947	-1	0.622607	0.474857	-1	-1	1	0.914844
RMF	-1	-1	-1	-1	-1	0.653523	0.482657	-1	-1	-1	0.603908	-1	0.570834	0.62992	-1	-1	0.775554	0.738273	0.520061	0.459527	0	0.555166	0.559592	0.602701	0.538246	-1	0.433393	0.822552	-1	0.568855	1	0.934882	-1	-1	0.512817	0.645713	-1	-1	-1	0.452504	0.725899	0.524618	-1	-1	0.46654	-1	0.613501	0.919679	-1
RMG	0	0.871096	0	-1	-1	0	0	-1	0	0.831734	0	0.497202	0	-1	0	-1	0.53958	0	0	0	-1	0	0	-1	0.349612	-1	0	0	-1	-1	0	0	0	-1	-1	0	-1	-1	0	-1	0	0	-1	-1	0	0.417732	0	-1	-1
RMH	0.429328	-1	0.448264	-1	-1	0.607038	0.500444	-1	-1	0	0.471749	0.798398	0.61955	0.674798	0.677427	-1	-1	0.66664	-1	-1	-1	-1	0.502647	-1	0.426817	-1	0.438425	0.651455	-1	-1	1	0.842072	-1	0.559424	-1	0.590184	0.505567	-1	0.920189	0.414822	0.641823	0.661854	0.685912	0.450351	0.497064	0.44791	-1	-1	0.86968
Rectal_gland	0	-1	0.654058	-1	-1	0.79808	0.649631	-1	0.698523	0	0.713568	0.93073	0.604496	0.727081	0.595354	0.502802	0.804001	0.776745	-1	-1	-1	0.605492	0.644974	-1	0.351488	-1	0.622445	-1	-1	-1	0.314744	0.431914	-1	0.804721	0.472705	0.717428	0.499478	-1	0.953705	-1	0.90495	-1	0.553616	-1	0.721359	0.554765	-1	-1	-1
SAA	0	-1	0.607773	0.382583	-1	0.736811	0.492338	-1	-1	-1	0.662336	-1	0.655177	0.763655	0.804135	-1	0.775876	-1	0	0.587913	-1	0.646727	0.536611	0.617255	-1	-1	0.502127	-1	-1	0.507648	0.801358	1	-1	0.571958	0.480327	0.596667	0.538444	-1	0.999101	0.490701	0.704093	0.524413	-1	-1	0.513356	0.503162	-1	-1	-1
SAB	-1	0.779117	-1	-1	-1	0.809584	-1	-1	-1	-1	-1	-1	-1	-1	-1	-1	-1	-1	-1	-1	-1	-1	-1	-1	-1	-1	-1	-1	-1	0.716722	-1	-1	-1	-1	-1	0.7437	-1	-1	-1	-1	0.642142	-1	-1	-1	-1	-1	-1	-1	-1
SDQ	0	-1	0	-1	-1	0.648903	0.670602	-1	-1	-1	0.766331	0.874879	0	0.807745	0.714921	-1	0.956722	-1	-1	0.528471	0	0.633084	0.675666	-1	0.540785	-1	0.471188	0.742697	-1	-1	-1	0.933334	-1	-1	0.625792	0.778213	0.556231	-1	-1	-1	0.707714	0.580165	-1	0	0.637664	0.514574	0.705532	-1	-1
SIA	0	-1	0.555175	-1	-1	0.615993	0.440184	-1	0.400791	0.702825	0.649421	0.829065	0.622637	0.742834	0.847034	0.708794	0.668926	0.755434	-1	0.270731	-1	0.644078	0.539856	-1	0.474378	-1	0.484565	0.683296	0.711566	-1	0.380122	0.892133	0.42051	-1	0.648135	0.568371	0.497759	0.507422	1	0.471193	0.640235	0.430587	0.51817	0.63439	0.529548	0.402616	0.720118	-1	-1
SIB	0.376123	0.403231	0.656946	0.369817	-1	0.591196	0.458138	-1	0.503496	0.684145	0.613756	0.8524	0.567533	0.769263	0.850096	0.725446	0.753417	0.754874	0.585761	0.488579	-1	0.658325	0.59379	0.554939	0.500421	-1	0.528627	0.741962	0.694444	0.578922	0.604187	0.937352	-1	-1	0.63126	0.568129	0.46536	0.573939	1	-1	0.653107	0.427772	0.649329	0	0.529859	0.442576	-1	-1	-1
SMB	0	0	0	-1	-1	0	0.548382	-1	0	0	0	0.960565	0.915868	0	0	-1	0.97152	0.815672	0.214522	0.46112	-1	0	0.553004	0.645744	-1	-1	0.636457	-1	0.817998	-1	0.608812	1	0.410257	-1	0.681478	0.734363	0.60333	-1	-1	0.540931	0.791741	0.717499	-1	0	0.570306	0	0.796215	-1	-1
SMD	0.271558	0	-1	0.290586	-1	0.603384	0.435332	-1	0.499379	0.541812	0.601002	0.795546	0.570531	0.705964	0.705763	-1	0.757099	0.692061	0.837177	0.477036	-1	0.613866	0.577399	0.536927	0.401057	-1	0.451507	0.767105	0.674598	-1	0.709995	0.938279	-1	-1	0.458899	0.630867	0.485114	0.332927	0.974629	-1	0.700742	0.448951	0.517232	0	0.492388	0.479979	0.649412	-1	-1
Seam_cells_bus	0.468027	-1	0.503609	-1	0.311597	0.843121	0.490384	-1	0.529354	-1	0.505673	0.764663	-1	0.670322	0.570764	-1	0.52986	0.787603	-1	-1	-1	0.491774	0.68554	0.643567	-1	-1	0.518062	0.485437	-1	-1	0.306575	0.674672	-1	-1	0.739959	-1	0.382977	0.416595	0.64145	-1	0.647612	0.485178	0.40633	-1	0.619978	0.465514	-1	-1	-1
Seam_cells_grd	0.614792	-1	-1	-1	-1	0.962984	0.38761	-1	-1	-1	-1	0.528085	-1	-1	0.834484	-1	0.555432	-1	0.61007	-1	-1	-1	0.688027	0.378582	-1	-1	-1	-1	-1	-1	-1	0.442551	-1	-1	-1	-1	-1	-1	-1	-1	0	-1	-1	-1	0.65377	0	0.64366	-1	-1
Seminal_vesicle	-1	-1	-1	-1	-1	0.843027	0.674127	-1	0.725199	-1	0.965117	0.896454	-1	0.554291	-1	-1	0.792778	-1	-1	-1	-1	0.755323	-1	0.624374	0.381853	-1	-1	0.615057	-1	-1	0.38123	-1	-1	0.62005	-1	0.563668	-1	-1	-1	-1	0.9649	-1	-1	-1	0.574672	0.584468	-1	-1	-1
Spermatheca_Uterine_junction	0	-1	-1	-1	-1	0.70179	-1	-1	-1	0.468028	-1	0.638762	-1	0.585428	0.7521	0.770677	-1	-1	0.892244	-1	-1	0.7776	0.834343	0.435558	-1	-1	-1	-1	-1	-1	0.442015	0.452351	-1	-1	0.412225	0.620638	-1	-1	0.701865	0.757587	-1	-1	0.657165	0.802475	0.445628	0.567813	-1	-1	-1
Spermatheca_bag_distal	0	-1	-1	-1	-1	0.424728	-1	-1	-1	0.656746	-1	0.861991	0.591708	0.385146	-1	-1	0.714601	0.717873	0.874508	-1	-1	0.742588	0.831555	0.583787	0.496305	-1	-1	0.660138	0.53605	-1	-1	0.521618	-1	-1	0.686101	0.443809	-1	0.619938	0.964968	0.515958	-1	0.589357	0.804549	-1	0.724937	0.67615	-1	-1	-1
Spermatheca_bag_proximal	0	-1	-1	-1	-1	0.350241	-1	-1	-1	-1	-1	0.741239	-1	-1	0.597657	-1	-1	-1	0.902584	-1	-1	-1	0.538969	-1	-1	-1	0	-1	-1	-1	-1	-1	-1	-1	-1	-1	-1	-1	0.773621	0.508306	-1	-1	0.552862	-1	0.848719	-1	-1	-1	-1
Spermatheca_neck_distal	0	-1	-1	-1	-1	0.502903	-1	-1	-1	-1	-1	0.838342	-1	-1	0	-1	-1	-1	-1	-1	-1	-1	0	-1	-1	-1	-1	0	-1	-1	-1	-1	-1	-1	-1	-1	-1	-1	0.768842	0.545159	-1	-1	0.716476	-1	0	-1	-1	-1	-1
Spermatheca_neck_proximal	0	-1	-1	-1	-1	0.470971	-1	-1	0	0.660679	-1	0.810504	-1	-1	0.621916	-1	-1	-1	-1	-1	-1	0	-1	-1	-1	-1	-1	0	0.647548	0.836074	-1	0.421795	-1	-1	0.651928	-1	-1	-1	0.743253	-1	-1	-1	0.789773	-1	0	-1	-1	-1	-1
Spermatids	0	-1	-1	-1	-1	0.640833	-1	1	-1	-1	-1	-1	-1	-1	0.824961	-1	-1	-1	0	-1	-1	-1	-1	-1	-1	-1	-1	0.460674	-1	-1	-1	-1	-1	-1	-1	-1	-1	-1	-1	-1	-1	-1	-1	-1	0.834908	-1	-1	-1	-1
Spermatocytes	0	-1	-1	-1	-1	0.494043	-1	0.80175	-1	-1	-1	-1	0.511244	-1	0.898257	-1	-1	-1	0	-1	-1	-1	-1	-1	-1	-1	-1	-1	-1	-1	-1	-1	-1	-1	-1	-1	-1	-1	-1	-1	-1	-1	-1	-1	0.635354	-1	-1	-1	-1
Syncytial_pachytene_spermatocytes	0.510889	0.817006	0.665088	-1	0.448381	0.372394	0.713929	0.510889	0.91553	-1	0.908454	1	-1	0.360355	0.701031	-1	0.899632	0.730675	0.572968	-1	0.739214	0.545592	0.715103	0.723021	0.459969	-1	0.72899	0.736051	0.664319	-1	0.305347	-1	-1	0.723486	0.807305	0.466199	0.642319	0.653185	-1	-1	0.986242	0.508263	-1	-1	0.640352	0.598185	-1	-1	-1
URA	0.316166	0.774919	-1	-1	-1	0.757216	-1	-1	0.680263	0.753777	-1	0.9395	-1	0.883507	-1	0.818024	-1	-1	0.599186	-1	-1	0.678543	0.755267	-1	0.547695	-1	0.489664	-1	-1	0.568055	0.799924	0.95478	-1	-1	-1	0.742198	-1	-1	-1	-1	-1	0.492011	0.874683	0	0.606552	0.572587	-1	-1	-1
URB	-1	-1	-1	-1	0.448474	0.60669	-1	-1	-1	-1	-1	-1	-1	0.759029	-1	-1	-1	-1	-1	-1	-1	-1	0.520361	-1	0.569112	-1	0.271039	-1	-1	-1	0.380856	0.816359	-1	-1	-1	0.59529	-1	-1	1	-1	-1	-1	-1	0.471246	0.567845	0.46003	0.628659	-1	-1
URX_AQR_PQR	0	0.618807	0	-1	-1	0.682583	0	-1	0.585177	0.454509	0.646926	0.806614	0.427898	0.644584	0.59417	-1	-1	-1	-1	0	-1	-1	0.946073	-1	-1	-1	0.417397	0.669045	0.561878	0.620594	0.978804	0.883112	-1	-1	-1	0.605606	0.51156	0	1	0.500384	-1	0.55424	-1	0	0.510551	0.516396	0.516152	-1	-1
URY	-1	-1	-1	-1	-1	0.595389	-1	-1	-1	-1	-1	-1	0.545921	0.672766	0.691984	-1	-1	-1	0.421897	-1	-1	-1	0.579702	0.680173	-1	-1	0.514318	-1	0.710592	0.581273	0.379119	0.891353	-1	0.555462	-1	0.58112	0.503958	-1	1	0.466144	0.575415	0.561422	-1	-1	0.496163	0.426488	0.573876	-1	0.922559
Unassigned_sheath_cells	0.376256	-1	-1	0.561783	-1	0.475914	-1	-1	0.602004	-1	0.690945	0.826575	0.554389	0.438428	0.586591	0.702596	0.605055	0.606815	0.496853	-1	-1	0	0.627183	0.671785	0.384483	0.650224	0.650131	0.592751	0.507987	-1	0.384717	0.519117	-1	-1	0.621259	0.46972	0.456231	0	1	0.482591	0.657484	0.559187	-1	0.608201	0.657798	0.572316	-1	-1	-1
Unassigned_uterine_cells	0	-1	-1	-1	-1	0.555651	-1	-1	-1	-1	0.618514	0.678372	-1	0.439015	0.679081	0.901858	0.57306	-1	0.704495	-1	-1	0.551706	0.729638	-1	-1	-1	-1	-1	-1	-1	-1	-1	-1	-1	-1	-1	-1	-1	0.799289	0.470296	-1	-1	-1	-1	0.783591	-1	-1	-1	-1
Uterine_muscle	0	-1	-1	-1	-1	0.208189	-1	-1	-1	0	-1	0.66828	-1	0.468132	0.458152	-1	0.517678	-1	-1	0	-1	0.800304	0.570734	-1	-1	0.467256	-1	-1	-1	-1	0.350697	0.478676	-1	-1	-1	-1	-1	-1	0.512628	-1	-1	0	-1	-1	0	0	0	-1	-1
Uterine_seam_cells	0	-1	-1	-1	-1	0.533279	-1	-1	-1	-1	-1	0	-1	0.794211	0	-1	0.566835	0.786007	-1	-1	-1	0	-1	0	-1	0	-1	-1	-1	-1	-1	-1	-1	-1	-1	0	-1	-1	1	0	-1	-1	0.685735	-1	0	-1	-1	-1	-1
Uterine_toroid	0	-1	-1	-1	-1	0.321873	-1	-1	-1	-1	-1	-1	0	0.533245	0.500572	-1	0.635807	-1	-1	-1	-1	0	0.404399	0.470298	-1	-1	-1	-1	-1	-1	-1	-1	-1	-1	-1	-1	-1	-1	0.738684	-1	0	-1	0.635372	-1	0.712328	-1	-1	-1	-1
Uterine_vulval_cells	0	-1	-1	-1	-1	0.43238	-1	-1	-1	0.79564	-1	0.784584	0.465834	0.597667	0.52121	-1	0.723038	-1	-1	-1	-1	0.676023	0.674473	-1	-1	-1	-1	0.517367	-1	-1	-1	0.607679	-1	-1	-1	0.50083	-1	0	0.909029	0.508761	0	-1	0.674785	-1	0.855015	-1	-1	-1	-1
VC	0.704454	0.577123	0	-1	0.450165	0.614843	0.470423	-1	0.553136	0.57397	0.748755	0.854735	-1	0.66026	0.63896	0.673742	0.730402	0.662487	0.179718	0.312862	-1	0.87441	0.533845	0.453945	-1	-1	0.55674	0.724936	-1	0.653985	0.212344	0.852892	0.457543	-1	0	0.754646	0.568312	-1	0.933065	0.524113	0.745324	0.46287	0.608734	0	0.571743	0.535282	0.838761	-1	-1
VC_4_5	0.412391	0.641546	0	-1	-1	0.682582	0.51749	-1	-1	-1	-1	0.901497	-1	-1	-1	-1	0.892982	-1	0	0.410805	-1	-1	-1	-1	-1	-1	0	-1	-1	0.680469	-1	-1	-1	-1	0.576165	0.89037	0.850762	0	1	0.535452	0.704832	0.566528	-1	0	0.579072	0.506358	0.844592	-1	-1
VD_DD	0.536096	-1	0.513361	-1	0.520271	0.656912	0.40454	-1	0.558469	0.820291	0.613063	0.757727	1	0.671292	0.66104	-1	0.700648	0.603963	0.51164	0.501044	-1	0.652613	0.56356	0.543263	0.439991	-1	0.573201	0.700758	0.629919	0.530723	0.537945	0.859406	-1	-1	0.470992	0.588658	0.511311	0.369046	0.91559	-1	0.799102	0.353305	0.496873	0	0.523573	0.460442	0.883302	-1	-1
Vulval_cells	0.557161	0.699928	0.445425	-1	-1	0.948992	0.500129	-1	-1	0.798049	0.602899	0.72186	-1	0.512952	0.650545	-1	0.509829	-1	0.626855	0	-1	0.528466	0.719469	0.621631	0.432736	0.718842	0.664498	-1	0.825243	-1	0.302686	0.366871	-1	-1	0.406217	0.707312	0.32583	-1	0.747195	-1	0.540969	0.82707	-1	-1	0.575039	-1	0.753698	-1	-1
XXX	0.448633	0.82433	-1	-1	-1	0.808532	0.696216	-1	0.745933	-1	-1	-1	-1	0.918177	-1	0.732553	0.910095	-1	-1	0.58498	-1	0.777983	0.768116	-1	-1	-1	0.549585	0.902968	-1	-1	0.368688	-1	0	0.776897	-1	0.885699	-1	-1	-1	-1	1	0.508625	-1	0.672727	0.593417	0.633737	-1	-1	-1
e1_e3	0	-1	-1	-1	-1	0.572139	-1	-1	-1	0.617287	-1	0.886171	0.46464	0.445082	0.663847	0.526141	0.566063	-1	0	-1	-1	0.5784	0.640085	-1	0.293223	0.631966	0.391557	-1	0.637058	-1	0.186023	0.800494	-1	-1	0.668052	0.358745	0.342759	-1	0.657265	0.442103	0.543161	0.218786	0.542808	0	0	-1	-1	0.512546	-1
e2	0	0.563459	-1	-1	-1	0.646724	-1	-1	0.592224	-1	-1	0.84132	0.496939	0.541444	0.657156	-1	0.677717	-1	0	-1	-1	-1	0	0.589486	0.459263	0.56413	0.446082	-1	0.547527	-1	0.191832	0.821722	-1	-1	0.549255	0.39399	0.37995	0.337596	0.708045	0.423758	-1	0.461486	0.528124	0.556049	0.22159	0.433773	-1	-1	-1
g1A	0.577125	-1	-1	-1	-1	0.634104	0.505125	-1	0.466346	-1	-1	-1	0.414721	-1	-1	0.52627	-1	-1	-1	-1	-1	-1	-1	0.542504	-1	-1	-1	-1	-1	-1	-1	-1	-1	-1	-1	0	-1	0	0.682625	0.414272	-1	-1	-1	0.6048	-1	0.41596	-1	-1	-1
g1P	0	0.783964	0	-1	-1	0.79652	0	-1	0.873919	-1	0	0.982613	0	0.88559	0.83202	0.516423	-1	0.712639	-1	-1	0.626699	-1	0	0	-1	-1	-1	0.647308	-1	-1	0.42986	-1	-1	0.541188	-1	0	0.635007	0	-1	-1	0.960984	-1	-1	-1	0	0.725867	-1	-1	-1
g2	1	-1	0.751109	-1	-1	0.947149	0.569094	-1	-1	-1	-1	0.945239	-1	-1	0.823229	0.365847	-1	-1	-1	-1	-1	0	0.777893	-1	-1	-1	-1	-1	-1	-1	0.66893	0.637232	-1	-1	-1	-1	0.609847	0	0.839487	-1	0.841206	-1	-1	-1	0	0.626302	-1	-1	-1
hmc	0	-1	0.573947	-1	-1	0.723412	0.470384	-1	0.632152	-1	0.412457	0.770373	0.607981	0.703085	0.717994	-1	0.71235	-1	-1	-1	0	0	0.562355	0.567421	-1	-1	0.459237	0.56727	-1	-1	0.339499	0.538193	-1	0.630947	0.530943	0.528975	0.772956	-1	0.707159	-1	0.990394	0.478895	0.766265	-1	0.455625	0.445602	-1	-1	-1
hyp7	0.473057	0.713947	0.539689	-1	0	0.917654	0.527997	-1	0.572954	-1	0.568858	0.813366	-1	0.737586	0.579979	-1	0.71891	0.918368	-1	-1	0.598681	0.469214	0.603732	0.978164	-1	-1	0.540657	0.517491	-1	-1	0.351756	-1	-1	0.627235	0.65815	0.630753	0.388597	0.570152	-1	-1	0.715827	-1	0.461862	-1	0.679956	0.493866	-1	-1	-1
hyp_4_to_7	0.462536	0.663225	0.46946	-1	0.377726	0.918087	0.462628	-1	0.556534	-1	0.567387	0.732971	-1	0.650237	0.710663	-1	0.586863	0.558277	-1	-1	0.545575	0	0.564661	0.568949	0.425041	-1	0.398521	0.524516	0.817495	-1	0.283409	-1	-1	0.652578	0.630724	0.638959	0.45414	0	-1	-1	0.673039	0.570379	-1	-1	0.661676	0.411779	-1	-1	-1
pm1_pm2	0	0.734737	-1	-1	-1	0.458692	-1	-1	0.492989	0.653472	-1	-1	0.428993	0.466753	0.523101	0.532978	-1	-1	-1	-1	-1	0.684799	0	-1	0.570913	0.507174	0.576836	-1	-1	-1	0.180543	0.614144	-1	-1	0.565276	0.16059	0.33478	-1	-1	0.363844	0.516046	0.469192	0.495383	0.406843	0.415664	-1	-1	-1	-1
pm3_pm4_pm5	0	-1	0.511668	-1	0	0.545047	0	-1	0.631676	-1	-1	0.693324	-1	0.549769	0.288967	0.394827	0.737646	0.51373	-1	-1	-1	0.714965	0.393396	0.462931	0.270151	0.423071	0.578774	0.559735	-1	-1	0.301988	0.580708	-1	-1	0	0	0.456085	-1	-1	-1	0.53665	0.441635	0.46203	0.497412	0.43163	0.412408	-1	-1	-1
pm6_pm7	0.468258	-1	0.506067	-1	-1	0.612877	0.590116	-1	0.681019	0.749222	-1	1	0.573566	0.68434	-1	0.745567	0.90355	0.726472	0	-1	-1	0.917314	0.587538	0.489543	-1	0.624729	-1	-1	-1	-1	-1	0.72901	-1	0.805855	0.580456	0.518199	-1	-1	0.856038	-1	0.643496	0.613812	0.626032	0.71493	0.516642	0.47069	0.474731	-1	-1
sex_muscle	-1	-1	-1	-1	-1	0	-1	-1	-1	-1	-1	-1	-1	0.732146	0	-1	-1	-1	-1	-1	-1	-1	0	0.771711	-1	0.651137	-1	0	-1	-1	-1	-1	-1	-1	-1	-1	-1	0	-1	-1	-1	0	-1	-1	0	-1	-1	-1	-1
sh1	0.429254	0.847479	0.601407	-1	0.402552	0.754149	0.653217	-1	0.801783	-1	0.767655	0.946098	-1	0.807611	0.695637	0.603524	0.782609	0.689253	-1	-1	0.624492	0.562923	0.644591	0.741927	0.433652	-1	0.582303	0.6512	0.797869	-1	0.326451	-1	-1	0.673143	0.571867	0.573672	0.626386	0	-1	-1	1	0.529857	0.449373	-1	0	0.476184	-1	-1	-1
sh2	0	0.941905	0.670937	-1	-1	0.797496	0.663354	-1	0.848198	-1	0.816695	1	-1	0.822703	0.701177	0.734851	0.792268	0.791517	0.643101	-1	0.625009	0	0.716252	0.828932	0.417773	-1	0.668779	0.688559	0.793669	-1	0.372132	-1	-1	0.671805	0.641588	0.641067	0.562965	0.498747	0.948183	-1	0.921501	0.700779	0.49605	-1	0	0.552434	-1	-1	-1
sh3_sh4	0	0.977144	0.646199	-1	-1	0.790355	0.602647	-1	0.860374	-1	0.827333	1	-1	0.791263	0.692471	0.788975	0.811291	0.815567	0.621752	-1	0.713872	0.634256	0.700605	0.787009	0.482141	-1	0.673829	0.67368	0.775147	-1	0.434684	-1	-1	0.678616	0.571064	-1	0.574248	0	-1	-1	0.978302	0.0911972	-1	-1	0	0.559441	-1	-1	-1
sh5	-1	-1	0.518483	-1	-1	0.631975	0	-1	0.618916	-1	0.522944	0.671693	-1	0.552288	0.590016	0.332996	0.748612	0.581142	0	-1	-1	-1	0.469844	0.465876	-1	0.470334	-1	0.56476	-1	-1	0.274607	-1	-1	0	0	-1	0.470648	-1	-1	-1	0.681251	-1	-1	-1	0	0.383917	-1	-1	-1
vm1	0	-1	-1	-1	-1	0.640788	-1	-1	-1	-1	0.426032	0.73742	-1	0.616948	0.55911	-1	0.533366	-1	-1	0	-1	-1	0.58225	0.523637	-1	0.531374	-1	-1	0.588306	-1	0.430907	0.512951	-1	-1	0	-1	-1	0	-1	0.47605	0	0.427977	-1	-1	0	0	0.363137	-1	-1
vm2	0	0.682926	-1	-1	-1	0.471409	-1	-1	-1	0	-1	0.51171	-1	-1	0.534844	-1	-1	-1	0	-1	-1	-1	0.452507	0.437148	-1	0.553168	-1	-1	-1	0.81548	-1	0.500113	-1	-1	-1	-1	-1	-1	0.505032	-1	-1	-1	-1	0	0	-1	0	-1	-1
[truncated: 136 more columns]

## Sheet: s3.Worm_larvae
CellType	C04F5.9	C16A3.4	C34B4.2	R02D3.7	Y55F3AM.14	ZK546.5	aha-1	alr-1	bcl-11	blmp-1	ceh-16	ceh-37	ceh-38	ceh-63	ceh-8	ceh-82	ceh-88	ceh-9	ceh-90	ces-1	crh-2	daf-12	dmd-4	dpl-1	dsc-1	efl-1	efl-3	egl-13	egl-27	egl-5	elt-1	elt-2	elt-3	eor-1	ets-5	fkh-10	fkh-2	fkh-4	fkh-7	fkh-8	fos-1	gmeb-1	grh-1	hlh-17	hlh-4	hmg-11	irx-1	2024-06-01	lin-11
ADE_CEP_PDE	-1	-1	0.789259	-1	0.649649	-1	-1	0.88302	-1	-1	-1	-1	0	-1	-1	-1	-1	-1	-1	-1	0.590885	0	-1	-1	-1	-1	-1	-1	0.805171	-1	-1	-1	-1	0.74117	-1	-1	-1	-1	0.618994	-1	0	0	-1	-1	-1	0.774682	-1	-1	0.893022
ADF	-1	0.808144	-1	-1	0.663835	-1	-1	-1	-1	-1	-1	-1	-1	-1	-1	-1	-1	-1	-1	-1	-1	-1	-1	-1	-1	-1	-1	-1	0.888521	-1	-1	-1	-1	-1	-1	-1	-1	-1	0.695558	1	0	0.503311	-1	-1	-1	0.840849	-1	0.809752	0.948557
ADL	-1	0.594441	0.508252	-1	0.78494	0.758895	-1	-1	-1	-1	-1	-1	0.53597	-1	-1	-1	0.748443	-1	-1	-1	0.683173	0.974826	-1	-1	-1	-1	-1	-1	0.770029	-1	-1	-1	-1	0.51493	-1	-1	-1	-1	0.547498	0.952909	0.590994	0.719008	-1	-1	0.958799	0.776506	-1	0.93662	1
AFD	-1	-1	-1	-1	-1	-1	-1	0.83534	-1	-1	-1	-1	0	-1	-1	-1	-1	-1	-1	-1	-1	-1	-1	-1	0.745485	-1	-1	1	0.768415	-1	-1	-1	-1	-1	-1	-1	-1	-1	0.726132	-1	0	-1	-1	-1	-1	-1	-1	0.6008	-1
AIA	-1	-1	-1	-1	-1	-1	-1	-1	-1	-1	-1	-1	0.661856	-1	-1	-1	-1	-1	-1	-1	0.85099	0	-1	-1	-1	-1	-1	0.870838	-1	-1	-1	0.614835	-1	1	-1	0.861379	-1	-1	0.601816	-1	0.686074	0.558057	-1	-1	-1	0.806258	-1	0.370968	-1
AIB	-1	-1	-1	-1	-1	-1	-1	-1	-1	-1	0.57358	-1	-1	-1	-1	-1	0.702701	-1	-1	-1	0.69531	0	-1	-1	-1	-1	-1	0.820824	0.759462	-1	-1	-1	-1	-1	-1	-1	-1	-1	0.525316	-1	0	0	-1	-1	-1	0.700913	0.493373	0	-1
AIM	-1	-1	-1	-1	0.662614	-1	0.67924	-1	-1	-1	-1	-1	0.504042	-1	-1	-1	0.79221	-1	-1	-1	0.732285	0	-1	-1	-1	-1	-1	-1	0.81766	-1	-1	-1	-1	-1	-1	-1	-1	-1	0.508424	-1	0	-1	-1	-1	-1	0.775721	-1	0.434599	-1
AIN	-1	-1	0.877697	-1	0.815858	-1	0.63825	-1	-1	-1	-1	-1	0.765817	-1	-1	-1	-1	-1	-1	-1	-1	0.579354	-1	-1	-1	-1	-1	0.93598	0.955738	-1	-1	-1	0	0.786481	-1	-1	-1	-1	0.592305	-1	0	0	-1	-1	-1	0.749762	-1	0.468299	-1
AIY	-1	-1	0.644418	-1	-1	-1	-1	0.779772	-1	-1	-1	-1	0	-1	-1	-1	-1	-1	-1	-1	-1	-1	-1	-1	-1	-1	-1	0.927917	0.907823	-1	-1	-1	-1	-1	-1	-1	-1	-1	0.616904	-1	0	0	-1	-1	-1	0.810777	-1	0.509264	1
ALA	-1	-1	0.906005	-1	-1	-1	-1	-1	-1	-1	-1	-1	-1	-1	-1	-1	-1	-1	-1	-1	0.615438	-1	-1	-1	-1	-1	-1	-1	-1	-1	-1	-1	-1	-1	-1	-1	-1	-1	0.780162	-1	-1	0	-1	-1	-1	0.874436	-1	-1	-1
ALM_PLM_AVM_PVM	-1	-1	0.432627	-1	-1	0.543587	0.49951	0.705939	-1	-1	-1	-1	0.475096	-1	-1	-1	0.588188	-1	-1	-1	0.475199	0.159023	-1	0.633222	-1	0.531558	-1	-1	0.627397	0.492787	-1	-1	-1	0.641837	-1	-1	-1	-1	0.50775	-1	0	0	-1	-1	-1	0.734337	-1	0.413711	-1
ALN_PLN_SDQ	0.712881	0.674119	-1	0.68058	0.556113	0.582854	0.838335	-1	-1	-1	-1	-1	0	-1	-1	-1	0.636966	-1	-1	-1	-1	0	-1	0.654992	-1	0.577541	-1	0.842962	0.703161	0.709494	-1	-1	-1	0.784439	-1	-1	-1	-1	-1	-1	0	-1	-1	-1	-1	0.704975	-1	0.490231	-1
AMsh	-1	0.497535	-1	-1	0.530584	0.579853	-1	-1	-1	0.428998	-1	0.453957	0.467843	-1	-1	-1	-1	-1	-1	-1	0.567783	0	-1	-1	-1	-1	-1	-1	0.505378	-1	-1	-1	-1	0.295023	-1	-1	-1	-1	0.404443	-1	0	0	0.491635	-1	-1	-1	-1	-1	-1
AMso_PHso	-1	0.574095	0.882392	0.828488	-1	0.589836	0.457288	0.700284	0.917296	0.777622	-1	0.639106	0.607386	-1	-1	-1	0.62654	-1	-1	-1	-1	0	-1	0.660645	0.652539	0.530864	-1	0.852179	1	-1	-1	-1	-1	0.472599	-1	-1	-1	-1	-1	-1	0.559122	0	0.865107	-1	-1	0	0.813394	0.537904	-1
AQR_PQR_URX	0.676735	0.646458	-1	-1	0.660261	0.921101	-1	0.886544	-1	-1	-1	-1	0.598005	-1	-1	-1	0.787275	-1	-1	-1	0.610577	0.812593	-1	-1	-1	-1	-1	0.984912	0.798658	-1	-1	-1	-1	0.749344	-1	-1	-1	-1	0.621813	-1	0	-1	-1	-1	-1	0.755633	-1	0.605338	-1
ASEL	-1	-1	-1	-1	-1	-1	-1	0.895952	-1	-1	-1	-1	0	-1	-1	-1	-1	-1	-1	-1	-1	0.67584	-1	-1	0.924819	-1	-1	-1	0.717462	-1	-1	-1	-1	-1	-1	1	-1	-1	0.606704	0.936666	0.705658	-1	-1	0.689316	-1	0.876445	-1	0.750066	-1
ASER	-1	-1	-1	-1	-1	-1	-1	-1	-1	-1	-1	-1	0	-1	-1	-1	-1	-1	-1	-1	0.780031	-1	-1	-1	-1	-1	-1	-1	0.875738	-1	-1	-1	-1	-1	-1	0.903747	-1	-1	0.772089	-1	0	0.655305	-1	-1	-1	-1	-1	1	-1
ASG	-1	0.520021	-1	-1	0.849362	-1	-1	-1	-1	-1	-1	0.695264	0.648088	-1	-1	-1	0.689579	-1	-1	-1	0.730125	0	-1	-1	-1	-1	-1	-1	0.850207	-1	-1	-1	-1	-1	1	-1	-1	-1	0.457844	0.851063	0	0.648426	-1	-1	-1	0.661455	0.805033	0.612226	0.967301
ASH_PHA_PHB	-1	0.522199	0.725668	-1	0.73466	-1	-1	-1	-1	-1	-1	-1	0	-1	-1	-1	0.708479	-1	-1	-1	0.639098	1	-1	-1	-1	-1	-1	0.804249	0.602863	0.716818	-1	-1	-1	-1	-1	-1	-1	-1	0.642111	0.902681	0	0.651931	-1	-1	-1	0.651555	-1	0.753996	0.89903
ASI	-1	0.650908	-1	-1	-1	-1	0.635003	-1	-1	-1	-1	0.7171	0.477757	-1	0.907321	-1	-1	-1	-1	-1	0.619839	1	-1	-1	-1	-1	-1	-1	0.666739	-1	-1	-1	-1	-1	-1	-1	-1	-1	0.675218	-1	0	-1	-1	-1	-1	0.783107	-1	0.526338	-1
ASJ	-1	-1	0.767813	-1	-1	-1	-1	-1	-1	-1	-1	-1	-1	-1	-1	-1	0.785103	-1	-1	-1	0.68362	0	-1	-1	-1	-1	-1	-1	0.715462	-1	-1	-1	-1	0.660027	-1	-1	0.210765	-1	0.650352	1	0	0.764946	-1	-1	-1	0.764445	-1	0.818575	-1
ASK	-1	-1	-1	-1	-1	-1	-1	-1	-1	-1	-1	-1	0.49792	-1	0.995556	-1	-1	-1	-1	-1	0.823498	1	-1	-1	-1	-1	-1	-1	0.83584	-1	-1	-1	-1	-1	-1	0.821942	-1	-1	0.596673	0.933863	0	0.554382	-1	-1	-1	0.811037	-1	0.791989	-1
AS_DA_DB_VA_VB_VC	-1	0.650422	0.483675	-1	0.677317	0.855197	1	-1	-1	-1	-1	-1	0.538685	-1	-1	-1	0.640652	-1	-1	0.851552	0.703588	0.155961	-1	0.60106	-1	0.532014	-1	-1	0.77536	0.761081	0.78149	-1	0.586963	0.649647	-1	-1	-1	-1	-1	-1	0	0.632693	-1	0	-1	0.765001	-1	-1	-1
AVA_AVE	-1	0.791703	0.526098	-1	0.654296	0.733866	-1	-1	-1	-1	0.526589	-1	0	-1	-1	-1	0.704914	-1	-1	-1	0.896271	0.858915	-1	-1	-1	0	-1	0.842073	0.832037	-1	-1	-1	-1	-1	-1	-1	-1	-1	0.569178	-1	0	0	-1	-1	-1	0.707891	-1	0.520828	0.941292
AVB	-1	-1	-1	-1	-1	-1	0.747721	-1	-1	-1	-1	-1	-1	-1	-1	-1	0.621481	-1	-1	-1	0.663007	0	-1	-1	-1	-1	-1	-1	0.720402	-1	-1	-1	-1	-1	-1	-1	-1	-1	-1	-1	0	0	0	-1	-1	-1	-1	0.428038	-1
AVD_PVC	-1	0.681927	-1	-1	0.606015	-1	0.655915	-1	-1	-1	-1	-1	0.578165	-1	-1	-1	0.727127	-1	-1	-1	-1	0.549249	-1	0	-1	-1	-1	-1	0.728636	0.741387	-1	-1	-1	0.807582	-1	-1	-1	-1	0.590889	-1	0	0	-1	-1	-1	-1	-1	0.481791	0.791657
AVG	-1	-1	-1	-1	0.608344	0.588767	-1	-1	-1	-1	-1	-1	-1	-1	-1	-1	0.496715	-1	-1	-1	0	0.690704	-1	-1	-1	-1	-1	-1	0.767231	-1	0	-1	-1	-1	-1	-1	-1	-1	0.751206	-1	0	0	-1	-1	-1	-1	0.676674	0	0.769568
AVH	-1	0.559123	-1	-1	0.671681	-1	0.60643	-1	-1	-1	-1	-1	-1	-1	-1	-1	-1	-1	-1	-1	0.733611	-1	-1	-1	-1	-1	-1	-1	0.66481	-1	0.867299	-1	-1	-1	-1	-1	-1	-1	0.558136	-1	0	0	-1	-1	-1	0.703393	0.734028	0.403666	0.963054
AVJ	-1	0.797348	-1	-1	-1	0.708018	-1	-1	-1	-1	-1	-1	0.661687	-1	-1	-1	0.664983	-1	-1	-1	-1	1	-1	-1	-1	0	-1	-1	0.634232	0.780193	-1	-1	-1	0.810675	-1	-1	-1	-1	0.590378	-1	-1	0	-1	-1	-1	0.707089	-1	0	0.84295
AVK	0.664243	-1	-1	-1	-1	-1	0.688212	-1	-1	-1	-1	-1	0.632873	-1	-1	-1	0.662858	-1	-1	-1	0.734252	-1	-1	-1	-1	-1	-1	0.862294	0.782552	-1	-1	-1	-1	-1	-1	-1	-1	-1	-1	-1	0	0	-1	-1	-1	0.716836	-1	0.401413	-1
AVL	0.693791	0.619587	-1	-1	0.933715	-1	-1	0.892963	-1	-1	-1	-1	0.620074	-1	-1	-1	-1	-1	-1	-1	0.783964	0	-1	-1	-1	0.566544	-1	-1	0.954787	0.752916	-1	-1	-1	0.582983	-1	-1	-1	-1	0.669953	-1	0	0	-1	-1	-1	0.943729	-1	0.508875	-1
AWA	-1	-1	-1	-1	-1	-1	0.577336	-1	-1	-1	-1	0.869772	0.628882	-1	-1	-1	0.811869	-1	-1	-1	-1	0	-1	-1	-1	-1	-1	-1	-1	-1	-1	-1	-1	0.596201	-1	-1	-1	-1	0.582772	0.909404	0	-1	-1	-1	-1	-1	-1	0.74894	-1
AWB	-1	-1	0.520995	-1	0.702682	-1	1	-1	-1	-1	-1	-1	-1	-1	-1	-1	-1	0	-1	-1	0.632388	-1	-1	-1	-1	-1	-1	-1	0.599203	-1	-1	-1	-1	-1	-1	-1	-1	-1	0.649972	0.678841	0	0	-1	-1	-1	0.791509	-1	0.707256	0.861678
AWC	-1	-1	-1	-1	-1	-1	-1	-1	-1	-1	-1	-1	0	-1	0.924028	-1	-1	-1	-1	-1	0.772612	-1	-1	-1	-1	-1	-1	-1	0.798553	-1	-1	-1	-1	-1	-1	-1	-1	-1	0.652263	0.819337	0	0	-1	-1	-1	0.794657	-1	0.775927	-1
Anterior_arcade_bin_1_mid_to_late_L2	-1	0.399951	-1	0.580671	-1	0.583626	-1	-1	1	-1	0.684828	-1	0.463877	-1	-1	-1	0.855706	-1	-1	-1	-1	0	-1	-1	-1	0	0.268648	0.51092	0.712031	0.564775	-1	-1	-1	0.518733	-1	-1	-1	-1	-1	-1	0	0	0.760294	-1	-1	0.30978	-1	0.630777	-1
Anterior_arcade_bin_2_around_L2_molt	0.419325	0.631496	0.428233	-1	-1	-1	-1	-1	1	-1	-1	-1	0.629626	-1	-1	-1	0.747717	-1	-1	-1	-1	0	-1	-1	-1	-1	-1	0.609688	0.786929	-1	-1	-1	-1	-1	-1	-1	-1	-1	0.532316	-1	0.545339	0	0.7438	-1	-1	0	-1	0.534851	-1
Anterior_arcade_bin_3_early_L3	-1	0.665659	-1	0.527463	-1	-1	-1	-1	0.918522	-1	-1	-1	-1	-1	-1	-1	-1	-1	-1	-1	-1	0	-1	-1	-1	-1	-1	-1	0.656035	-1	-1	-1	-1	-1	-1	-1	-1	-1	0.669017	-1	0	0	-1	-1	-1	-1	-1	0	-1
BAG	-1	0	0.474894	-1	-1	-1	1	0.724749	-1	-1	-1	0.686847	-1	-1	-1	-1	-1	-1	-1	-1	0.759016	-1	-1	-1	-1	-1	-1	0.916023	0.822918	-1	-1	-1	-1	0.662399	0.936876	-1	-1	-1	-1	-1	0	-1	-1	-1	-1	-1	-1	0.520986	-1
BWM_anterior	0.761029	0.478624	0.663496	-1	0.59056	-1	-1	-1	-1	-1	-1	-1	0	-1	-1	-1	-1	-1	-1	-1	0	0	-1	-1	-1	-1	-1	0.645311	0.475238	-1	-1	-1	-1	0.736876	-1	-1	-1	-1	-1	-1	0	0	-1	-1	-1	-1	0.603888	-1	-1
BWM_far_posterior	-1	0.44778	0.57071	0.391596	-1	0.566009	-1	-1	-1	-1	-1	-1	0.466126	-1	-1	-1	-1	-1	-1	-1	0	0	-1	0.582448	-1	0.711994	-1	0.60295	0.513758	0.74163	-1	-1	-1	0.755787	-1	-1	-1	-1	-1	-1	0	0	-1	-1	-1	-1	-1	-1	-1
BWM_head	0.78602	0.610408	0.6723	-1	-1	-1	0.693922	-1	-1	-1	-1	-1	0.536731	-1	-1	-1	-1	-1	0.674977	-1	0	0	-1	-1	-1	-1	-1	0.598302	0.558433	-1	-1	0	-1	0.550624	-1	-1	-1	-1	-1	-1	0	0	-1	-1	-1	-1	0.611343	-1	-1
BWM_middle_and_posterior	-1	0.480529	0.624021	-1	0.537282	-1	-1	-1	-1	-1	-1	-1	0	-1	-1	-1	-1	-1	-1	-1	0	0	-1	-1	-1	-1	-1	0.624426	0.438854	-1	-1	-1	-1	0.819889	-1	-1	-1	0.93728	0.476269	-1	0	0	-1	-1	-1	-1	0.678788	-1	-1
BWM_neck	-1	0.539486	0.687171	-1	0.59244	-1	0.746382	-1	-1	-1	-1	-1	0.516872	-1	-1	-1	-1	-1	-1	-1	0	0	-1	-1	-1	-1	-1	0.568319	0.419129	-1	-1	-1	-1	0.672753	-1	-1	0.817466	-1	-1	-1	0	0	-1	-1	0	-1	0.579602	-1	-1
BWM_posterior	-1	0.455836	0.605777	-1	-1	0.66129	-1	-1	-1	-1	-1	-1	0.264989	-1	-1	-1	-1	-1	-1	-1	0	0	-1	-1	-1	-1	-1	-1	0.580307	0.768189	0	-1	-1	0.78694	-1	-1	-1	-1	-1	-1	0	0	-1	-1	-1	-1	-1	-1	-1
CAN	0.812837	0.705141	-1	-1	-1	0.80467	-1	-1	-1	-1	-1	-1	-1	-1	-1	-1	0.804752	-1	-1	-1	0.867599	0	-1	-1	-1	0.796796	-1	-1	0.720785	-1	-1	-1	-1	0.794578	-1	-1	-1	-1	-1	-1	0	0.674811	-1	-1	-1	0	-1	-1	-1
CEPsh	0.717701	-1	-1	-1	0.942951	-1	-1	-1	0.867728	0.818328	-1	-1	-1	-1	-1	-1	0.717213	-1	-1	-1	-1	0	-1	0.630016	-1	0.390216	-1	-1	1	-1	-1	-1	-1	0.807823	-1	-1	-1	-1	-1	-1	0.605671	0	0.862257	0.687998	-1	0.697557	0.73167	-1	-1
Coelomocyte	-1	0.571327	-1	-1	0.598102	0.661629	0.398961	-1	-1	-1	-1	-1	0	-1	-1	-1	0.617747	-1	-1	-1	0	0	-1	-1	-1	0.823337	-1	-1	0	-1	-1	-1	-1	0.386746	1	-1	-1	-1	0.496985	-1	0.731477	0	-1	-1	-1	-1	0.790939	-1	-1
DD_VD	0.675733	0.571847	0.532905	-1	0.967936	-1	0.971865	0.763889	-1	-1	-1	-1	0.854301	-1	-1	-1	0.671223	-1	-1	0.851372	0.787925	0.359733	-1	-1	-1	-1	-1	-1	0.738526	0.686893	0.881667	0	-1	0.805009	-1	-1	-1	-1	-1	-1	0	0	-1	-1	-1	0.71957	0.742423	-1	-1
DVA	-1	-1	0.49306	-1	0.711033	-1	-1	-1	-1	-1	-1	-1	-1	-1	-1	-1	0.694186	-1	-1	-1	0.820227	1	-1	-1	-1	-1	-1	0.786393	0.758719	-1	-1	-1	-1	0.64404	-1	-1	-1	-1	-1	-1	0.686169	0	-1	-1	-1	0.631224	-1	-1	0.858357
DVC_tentative	-1	-1	-1	-1	0.800148	-1	-1	-1	-1	-1	-1	-1	-1	0.942287	-1	-1	0.762712	-1	-1	-1	0.769087	0.766091	-1	-1	-1	-1	-1	-1	0.84807	-1	-1	-1	-1	-1	-1	-1	-1	-1	-1	-1	0.734462	0	-1	-1	-1	0.762057	-1	-1	-1
Distal_tip_cell	-1	0.666431	-1	0.759935	-1	0.891445	0.678427	-1	-1	0.715897	-1	-1	0	-1	-1	-1	0.688925	-1	0.63185	-1	0.390343	0	-1	-1	-1	0.719941	0	1	0.774687	-1	-1	-1	-1	0.524967	-1	-1	-1	-1	0.668982	-1	0.666656	0	-1	-1	-1	0.603488	-1	-1	-1
Excretory_cell	-1	0.795271	0.863814	-1	0.986374	-1	0.652111	-1	0.893969	-1	-1	0.78761	0.702047	-1	-1	-1	0.793564	-1	-1	-1	-1	0	-1	-1	-1	-1	-1	-1	0.774787	-1	-1	-1	-1	-1	-1	-1	-1	-1	0.814835	-1	-1	0.650453	0.846811	-1	-1	-1	-1	-1	-1
Excretory_duct	-1	0.745347	0.467498	0.853195	-1	0.722261	0.417285	-1	0.822667	0.741131	0.722576	0.602614	0.637953	-1	-1	-1	0.733951	-1	-1	-1	-1	0	-1	-1	-1	0.452352	0.485438	0.502708	1	-1	-1	-1	-1	-1	-1	-1	-1	-1	-1	-1	0.519764	0	0.843167	-1	-1	-1	0.60308	-1	-1
Excretory_gland	-1	0.775809	0.708703	-1	0.774949	-1	-1	-1	-1	-1	-1	-1	0.675752	-1	-1	-1	0.791505	-1	-1	-1	0.847149	0	-1	-1	-1	0	-1	-1	0.651825	-1	-1	-1	-1	0.377577	-1	-1	-1	-1	0.624511	-1	0	0.614241	-1	-1	-1	0.918848	-1	-1	-1
FLP_PVD	0.792337	0.759412	0.578622	-1	0.667398	0.588572	0.629109	0.897309	-1	-1	-1	-1	0	-1	-1	-1	0.685065	-1	-1	0.972804	0.693551	0	-1	-1	-1	0.577908	-1	-1	0.765429	-1	-1	-1	-1	0.533023	-1	-1	-1	-1	0.654078	-1	0	0.576733	-1	-1	-1	-1	-1	-1	-1
GLR	-1	0.684674	0.93754	-1	-1	-1	-1	-1	0.92943	-1	-1	-1	0	-1	-1	-1	-1	-1	-1	-1	0.685413	0	-1	-1	-1	-1	-1	-1	0.663664	-1	0	-1	-1	-1	-1	-1	0.893029	-1	0.637415	-1	0	0	-1	-1	-1	0.680385	-1	-1	0.73453
Germline	0.939444	0.70952	0.546167	0.856334	-1	0.978355	-1	-1	-1	-1	-1	-1	0.702335	-1	-1	0.752464	-1	-1	-1	-1	0.490138	-1	-1	1	-1	0.863623	-1	-1	0.46791	-1	-1	-1	-1	0.570197	-1	-1	-1	-1	-1	-1	-1	-1	-1	-1	-1	-1	-1	-1	-1
Head_hypodermis	0.654302	0.67142	0.366612	-1	-1	0.642502	0.537191	-1	-1	0.739275	-1	0.557144	-1	-1	-1	-1	0.784992	-1	-1	-1	-1	0	-1	-1	-1	0	-1	0.688853	0.914082	-1	0.716812	-1	-1	0.559069	-1	-1	-1	-1	0.564595	-1	0	0	-1	0.792408	-1	0	-1	0.64993	-1
I5	-1	0.592688	-1	-1	0.830282	-1	-1	-1	-1	-1	-1	-1	0.71623	-1	-1	-1	0.723763	-1	-1	-1	0.736845	0	1	-1	-1	-1	-1	-1	-1	-1	-1	-1	-1	-1	-1	-1	-1	-1	0.564231	-1	-1	0	-1	-1	-1	0.762855	-1	-1	0.995099
IL1	-1	-1	-1	-1	0.838466	0.662615	1	0.898205	-1	-1	-1	-1	0.620524	-1	-1	-1	-1	-1	-1	-1	-1	0	-1	-1	-1	-1	-1	-1	0.904523	-1	-1	-1	-1	-1	0.909569	-1	-1	-1	-1	0.852891	0	0	-1	-1	-1	0.802695	0.6829	-1	-1
IL2	-1	-1	0.643199	-1	0.844752	0.926038	0.927065	-1	-1	-1	-1	-1	0.477476	-1	-1	-1	-1	-1	-1	-1	0.575928	0	-1	-1	-1	-1	-1	-1	0.814688	-1	0.784782	-1	-1	-1	-1	-1	-1	-1	-1	0.896333	0	0.640631	-1	-1	-1	0.760143	-1	-1	-1
Includes_CEPso_ILso	-1	0.561926	-1	0.811689	1	0.610199	0.477706	0.707019	0.954685	0.774524	-1	-1	0.349629	-1	-1	-1	0.684781	-1	-1	-1	-1	0	-1	0	-1	-1	-1	0.92514	0.895225	-1	-1	-1	-1	0.475765	-1	-1	-1	-1	0.459091	-1	0	0	0.722185	-1	-1	0.608118	0.489065	0.508996	-1
Intestine_anterior	0.7353	0.616331	0.340817	0.571492	-1	0.544269	0.688908	0.727934	-1	0.495972	-1	0.553185	0.526495	-1	-1	-1	0.583281	-1	-1	-1	0.773357	0	-1	0.666322	-1	0.536088	0.341408	-1	0.459091	-1	-1	0.895273	-1	0.424359	-1	-1	-1	-1	0.639434	-1	0.835038	0.727231	-1	-1	-1	-1	-1	0.540995	-1
Intestine_far_posterior	0.763065	0.63094	0.445092	-1	-1	0.522586	0.346215	-1	0.688193	-1	-1	-1	0.396998	-1	-1	-1	-1	-1	-1	-1	0.766527	0	-1	0.684486	-1	0.607723	0.534109	0.236764	0.56749	-1	-1	0.897814	-1	0.444883	-1	-1	-1	-1	0.649217	-1	0.828996	0.708081	-1	-1	-1	-1	-1	0.768657	-1
Intestine_middle_and_posterior	0.696281	0.595707	0.535395	-1	0.553785	-1	0.622031	-1	-1	0	-1	0.56684	0.570732	0.699767	-1	-1	0.234653	-1	-1	0.682464	0.708968	0	-1	0.522683	-1	-1	0.488866	-1	0.492899	-1	-1	0.83654	-1	0.466653	-1	-1	-1	-1	0.688296	-1	0.790435	0.690494	-1	-1	-1	-1	-1	0.60432	-1
Marginal_cell_bin_1_mid_to_late_L2	-1	0.59311	0.535035	0.913641	0.935963	0.739665	-1	-1	0.877898	-1	-1	-1	0	-1	-1	-1	0.725769	-1	-1	-1	-1	0	-1	-1	-1	0	-1	-1	1	-1	-1	0	0.694817	0.521029	-1	-1	-1	-1	-1	-1	0.710382	-1	0.799409	-1	-1	0.893651	-1	-1	-1
Marginal_cell_bin_2_around_L2_molt_to_early_L3	-1	0.542645	0.467143	0.544252	0.66884	-1	0.443409	-1	0.918859	-1	-1	-1	-1	-1	-1	-1	-1	-1	-1	-1	-1	0	-1	-1	-1	-1	-1	-1	0.643688	-1	-1	0.540443	-1	0.509861	-1	-1	-1	-1	0.614915	-1	0.671063	-1	0.552949	-1	-1	-1	-1	0.516449	-1
OLQ	-1	-1	0.753952	-1	0.768854	-1	-1	-1	1	-1	-1	-1	0.724393	-1	-1	-1	-1	-1	-1	-1	0.633328	0	-1	-1	-1	-1	-1	-1	0.802806	0.81846	-1	-1	-1	0.755992	-1	-1	-1	-1	-1	-1	-1	0	-1	-1	-1	-1	-1	0	-1
PHsh	-1	0.883664	-1	-1	0.858934	-1	0.461281	0.700279	0.833401	0.646399	-1	-1	0.644587	-1	-1	-1	0.616994	-1	-1	-1	0.822042	-1	-1	0.583302	-1	0.609852	-1	-1	0.820077	-1	-1	-1	-1	0.427478	-1	-1	-1	-1	-1	-1	0.654034	0	0.783695	-1	-1	-1	-1	0.674406	-1
PVP	-1	0.436253	-1	-1	-1	-1	-1	-1	-1	-1	-1	-1	0	-1	-1	-1	0.549137	-1	-1	-1	0.687068	0.977998	-1	-1	-1	-1	-1	-1	0.651461	0.630471	-1	-1	-1	0.560969	-1	-1	-1	-1	-1	-1	0	0	-1	-1	-1	0.631876	-1	0.490747	0.740842
PVQ	-1	-1	-1	-1	-1	-1	-1	-1	-1	0	-1	-1	0.649919	-1	-1	-1	-1	-1	-1	-1	-1	1	-1	-1	-1	-1	-1	-1	0.762131	-1	-1	-1	0	-1	-1	-1	-1	-1	-1	-1	0	0.420594	-1	-1	-1	0.712486	0.546293	0.493471	0.896414
PVT	-1	0.740385	-1	-1	-1	-1	-1	-1	-1	-1	-1	-1	0.729467	-1	-1	-1	-1	-1	-1	-1	0.676005	0.229991	-1	0	-1	-1	-1	-1	0.954739	-1	-1	-1	-1	-1	-1	-1	-1	-1	0.645812	-1	-1	-1	-1	-1	-1	0.647505	0.663852	0.696141	0.982418
Pharyngeal_epithelial_cell_tentative	-1	0.53619	-1	-1	-1	-1	-1	-1	1	-1	-1	-1	0	-1	-1	-1	0	-1	-1	-1	-1	0	-1	-1	-1	-1	-1	-1	0.697103	-1	-1	-1	-1	0.545215	-1	-1	-1	-1	0.485748	-1	0.688881	-1	-1	-1	-1	-1	-1	0	-1
Pharyngeal_neuron_1	-1	0.745551	-1	-1	0.736012	-1	0.64819	-1	-1	-1	-1	-1	0.645045	-1	-1	-1	-1	-1	-1	-1	-1	0	-1	-1	-1	-1	-1	-1	0.875332	-1	-1	-1	-1	0.810545	-1	-1	-1	-1	-1	-1	-1	0	-1	-1	-1	0.827573	0.762276	0	-1
Pharyngeal_neuron_2	-1	-1	-1	-1	0.864774	-1	0.611814	0.925984	0.827534	0	-1	-1	0.716776	-1	-1	-1	-1	-1	-1	-1	-1	0	-1	0	-1	-1	-1	-1	0.999953	-1	-1	-1	-1	-1	-1	-1	-1	-1	-1	-1	0	-1	0.674985	-1	-1	0.755521	0.723696	-1	-1
Pharyngeal_neuron_3	-1	-1	-1	-1	0.839288	-1	0.664085	0.885389	0.908901	0	-1	-1	0.478634	-1	-1	-1	0.773336	-1	-1	-1	-1	0	-1	0	-1	0.677006	-1	-1	0.919055	-1	-1	0	-1	0.609408	-1	-1	-1	-1	0.662576	-1	0	-1	-1	-1	-1	0.898856	0.87183	-1	-1
Posterior_arcade_bin_1_mid_to_late_L2	-1	0.486271	0.484436	-1	-1	0.492514	0.476125	-1	1	-1	-1	-1	0.689473	-1	-1	-1	0.817016	-1	-1	-1	-1	0	0.389655	-1	-1	-1	-1	0	0.616671	-1	-1	-1	-1	-1	-1	-1	-1	-1	-1	-1	0.621073	-1	0.726393	-1	-1	-1	-1	0.673026	-1
Posterior_arcade_bin_2_around_L2_molt	-1	0.442596	0.363613	-1	-1	-1	-1	-1	1	-1	-1	-1	-1	-1	-1	-1	0.772746	-1	-1	-1	-1	0	-1	-1	-1	-1	-1	-1	0.588003	-1	-1	-1	-1	-1	-1	-1	-1	-1	-1	-1	0.374625	-1	0.398882	-1	-1	-1	-1	0.407229	-1
Posterior_arcade_bin_3_early_L3	-1	0.650122	0.389445	-1	-1	-1	-1	-1	1	-1	-1	-1	0.571642	-1	-1	-1	-1	-1	-1	-1	-1	0	-1	-1	-1	-1	-1	-1	0.598091	0.548618	-1	-1	0.556823	0.62295	-1	-1	-1	-1	0.514968	-1	0.550178	0	0.51683	-1	-1	0	-1	0	-1
RIA	-1	0.811134	0.512934	-1	0.731041	0.700667	-1	-1	0.681636	-1	-1	-1	0.416484	-1	0.98385	-1	0.68405	-1	-1	-1	0.671468	0	-1	0.653309	-1	-1	-1	-1	0.684498	-1	-1	-1	-1	-1	-1	-1	-1	-1	-1	-1	-1	0.552259	-1	-1	-1	0.687057	-1	-1	-1
RIC	-1	-1	0.557214	-1	0.648779	-1	-1	-1	-1	-1	-1	-1	-1	-1	-1	-1	-1	-1	-1	-1	-1	-1	-1	-1	-1	-1	-1	-1	0.691115	-1	-1	-1	-1	-1	-1	-1	-1	-1	0.583802	-1	0	-1	-1	-1	-1	0.653207	-1	0	0.768307
RID	-1	-1	-1	-1	-1	-1	0.492679	-1	-1	-1	-1	-1	0.580391	-1	-1	-1	0.676328	-1	-1	-1	-1	-1	-1	-1	-1	-1	-1	-1	0.742262	-1	-1	-1	-1	-1	-1	-1	-1	-1	-1	-1	0	0	-1	-1	-1	0.621465	-1	0	-1
RIM	-1	-1	-1	0.623159	-1	-1	1	0.751423	-1	-1	-1	-1	0	-1	-1	-1	0.799422	-1	-1	-1	-1	0	-1	-1	-1	-1	-1	-1	0.779605	-1	-1	-1	-1	0.690881	-1	-1	-1	-1	0.573862	-1	0	0.608783	-1	-1	0.657168	0.729977	-1	0	0.873408
RIS	-1	-1	-1	-1	-1	-1	-1	-1	-1	-1	-1	-1	0.625678	-1	-1	-1	0.809108	-1	-1	-1	-1	-1	-1	-1	-1	-1	-1	1	0.964287	-1	-1	-1	-1	-1	-1	-1	-1	-1	0.683487	-1	0	0	-1	-1	-1	0.800761	0.545274	0.434554	-1
RMD	-1	-1	0.580319	-1	-1	-1	1	-1	-1	-1	-1	-1	-1	-1	-1	-1	-1	-1	-1	-1	0.569562	0	-1	-1	-1	-1	-1	-1	0.620029	-1	-1	-1	-1	-1	-1	0.791244	-1	-1	-1	-1	0	0	-1	-1	-1	0.660139	-1	-1	-1
RME	0.809768	-1	0.687539	-1	-1	-1	-1	0.919047	0.934656	-1	-1	-1	-1	-1	-1	-1	-1	-1	-1	-1	-1	0	-1	-1	-1	0.588906	-1	-1	0.981082	-1	-1	-1	-1	0.673719	-1	0.959311	-1	-1	-1	-1	-1	0	-1	-1	-1	0.888105	-1	-1	-1
RMG	-1	0.568214	-1	-1	0.721786	-1	-1	-1	-1	-1	-1	-1	0.548743	-1	-1	-1	0.719849	-1	-1	-1	-1	0.904636	-1	-1	-1	0.370725	-1	0.868056	0.786417	0.566914	-1	-1	-1	-1	-1	-1	-1	-1	-1	-1	0	-1	-1	-1	-1	0.686399	-1	0.537268	-1
RMH_tentative	-1	0.510078	0.665534	-1	0.590312	-1	0.971679	-1	-1	-1	-1	-1	0.411913	-1	-1	-1	0.726074	-1	-1	-1	0.775453	0.86403	-1	-1	-1	-1	-1	-1	0.815316	-1	-1	-1	-1	-1	-1	1	-1	-1	-1	-1	0	0	-1	-1	-1	0.79417	-1	-1	-1
SAA_SAB	-1	-1	-1	-1	0.651457	0.731838	0.871938	-1	-1	-1	-1	-1	0.573135	-1	-1	-1	0.673913	-1	-1	-1	0.695148	0	-1	-1	-1	0	-1	-1	0.779584	-1	-1	-1	-1	0.713918	-1	-1	-1	-1	-1	-1	0	-1	-1	-1	-1	0.725387	-1	-1	-1
SIA_SIB	-1	0.693479	0.485656	0.77057	0.685015	-1	0.591057	-1	-1	-1	-1	-1	0.584489	-1	-1	-1	0.722349	-1	-1	-1	0.715476	0	-1	0.625948	-1	0.585092	-1	-1	0.722087	-1	-1	-1	-1	0.887477	-1	-1	-1	-1	-1	-1	0	0	-1	0	-1	0.678849	-1	0.476781	-1
SMB	-1	-1	0.744189	-1	0.726399	-1	-1	-1	-1	-1	-1	-1	0.684058	-1	-1	-1	-1	0	-1	-1	-1	0.282521	-1	-1	-1	-1	-1	-1	0.807287	-1	-1	-1	-1	-1	-1	-1	-1	-1	-1	-1	-1	0	-1	-1	-1	-1	-1	0	-1
SMD	-1	0.558079	0.469504	-1	0.591212	0.981044	1	-1	0.571243	-1	-1	-1	0	-1	-1	-1	-1	-1	0.613247	-1	0.650785	0	-1	-1	-1	-1	-1	-1	0.740424	-1	-1	-1	-1	-1	-1	0.850817	-1	-1	-1	-1	0	0	-1	-1	-1	0.662067	-1	-1	-1
Seam_cell_bin_1_mid_L2	-1	0.450345	-1	-1	-1	0.668655	-1	-1	-1	0.733433	0.833035	-1	0.488527	-1	-1	-1	0.607692	-1	-1	-1	0	0	-1	0.718167	-1	0.625726	0.69123	0.472162	0.704114	-1	0.803966	-1	-1	0.601629	-1	-1	-1	-1	0.757981	-1	0	0	0.726703	-1	-1	-1	-1	0.738906	-1
Seam_cell_bin_2_late_L2	0.628853	0.473963	-1	0.759929	-1	0.62414	-1	-1	0.749816	0.657979	1	-1	0.400113	-1	-1	-1	0.606326	-1	-1	-1	0	0	-1	0.628669	-1	0.689159	0.467545	0.564909	0.53254	-1	0.861219	-1	-1	0.528467	-1	-1	-1	-1	-1	-1	0	0.543483	0.530072	-1	-1	-1	-1	-1	-1
Seam_cell_bin_3_around_L2_molt	0.57165	0.356379	-1	0.715435	-1	0.561361	0.341143	-1	-1	0.580241	1	-1	0.407967	-1	-1	-1	0.552622	-1	-1	-1	-1	0	-1	0.572483	-1	0.699705	0.39728	0.446861	0.532904	-1	0.855812	-1	-1	0.326344	-1	-1	-1	0	0.410619	-1	0	0	-1	-1	-1	-1	-1	-1	-1
Seam_cell_bin_4_ecdysis_post_L2_molt	0.706416	0.516324	0.354923	0.752035	-1	0.717195	-1	-1	-1	0.586747	1	-1	0.54912	-1	-1	-1	0.738237	-1	-1	-1	-1	0	-1	0.629395	-1	0.630158	0.594107	-1	0.601148	-1	0.804654	-1	0.630076	0.342361	-1	-1	-1	-1	-1	-1	0	0.251826	-1	-1	-1	0	-1	-1	-1
Seam_cell_bin_5_early_L3	0.679767	0.566758	0.360659	-1	-1	0.773166	0.383526	-1	-1	0.738167	0.85635	-1	0.642509	-1	-1	-1	0.802516	-1	-1	-1	0.556596	0	-1	-1	-1	0.364298	1	-1	0.703509	-1	0.768525	-1	-1	0.578024	-1	-1	-1	0	0.57546	-1	0	0	0.839119	-1	-1	-1	-1	0.465992	-1
Sex_myoblast	-1	0.681799	-1	0.849519	-1	0.942888	-1	-1	-1	-1	-1	-1	0	-1	-1	-1	0.77752	-1	-1	-1	-1	0	-1	0.790374	-1	0.716585	0.73068	0.981039	0.546645	-1	-1	-1	-1	0.344622	-1	-1	-1	-1	-1	-1	0.620692	0.920626	-1	-1	-1	-1	-1	-1	-1
Somatic_gonad_precursor	1	0.705282	0.540599	0.80834	-1	0.915744	-1	-1	-1	0.682308	-1	-1	0.611324	-1	-1	-1	0.74324	-1	-1	-1	-1	0	-1	0.768013	-1	0.419161	0.645064	-1	0.548999	-1	-1	0.401735	-1	0.576994	-1	-1	-1	-1	-1	-1	0.67402	0.695427	-1	-1	-1	0.312899	-1	0.615255	-1
Tail_hypodermis_bin_1_late_L2	-1	-1	-1	-1	-1	-1	-1	-1	0.827437	0.805809	-1	-1	-1	-1	-1	-1	-1	-1	-1	-1	0.668365	0	-1	-1	-1	0.691469	-1	-1	0.66084	-1	-1	-1	-1	0.433482	-1	-1	-1	-1	-1	-1	0	-1	-1	-1	-1	-1	-1	0.756317	-1
Tail_hypodermis_bin_2_around_L2_molt	-1	0.693896	-1	-1	-1	0.402696	-1	-1	-1	0.66283	-1	-1	-1	-1	-1	-1	0.910312	-1	-1	-1	-1	0	-1	0	-1	-1	0.452582	0	0.919044	-1	-1	-1	0.756982	-1	-1	-1	-1	-1	0.50177	-1	0	0	0.811267	-1	-1	0	0.792675	-1	-1
Vulval_precursor_bin_1_late_L2	-1	0.636869	-1	-1	-1	0.859833	-1	-1	0.735976	0.708254	-1	-1	0.604975	-1	-1	-1	-1	-1	-1	-1	-1	0	-1	0.595321	-1	0.507466	0.659942	-1	0.742735	-1	-1	-1	-1	0.552612	-1	-1	-1	-1	-1	-1	0.554535	0.543837	0.581726	-1	-1	0.503118	-1	0.82132	-1
Vulval_precursor_bin_2_early_L3	-1	0.682581	-1	-1	-1	-1	0.449462	-1	-1	0	-1	-1	0.618742	-1	-1	-1	0.815331	-1	-1	-1	-1	0	-1	0.7477	-1	0.555067	0.673715	0.674081	0.770805	-1	-1	-1	-1	0.50677	-1	-1	-1	-1	-1	-1	0	0.724086	-1	-1	-1	0	-1	-1	-1
XXX	-1	-1	-1	0.761773	0.825465	-1	-1	-1	0.725927	-1	-1	1	-1	-1	0.900157	-1	-1	-1	-1	-1	0.415094	0.79459	-1	0.549778	-1	-1	-1	-1	0.818379	-1	-1	-1	-1	-1	-1	-1	-1	-1	0.683846	-1	0	-1	-1	-1	-1	-1	-1	0	0.776343
g1A	0.753401	0.5229	-1	-1	0.844783	-1	-1	-1	0.839086	-1	-1	-1	0	-1	-1	-1	-1	-1	-1	-1	0	0	-1	-1	-1	-1	-1	-1	0.555765	-1	-1	-1	-1	0.341937	-1	-1	-1	-1	0.67485	-1	0	-1	-1	-1	-1	-1	0.828721	-1	-1
g1P	-1	0.597599	-1	-1	-1	-1	-1	-1	0.927813	0.700903	-1	-1	0	-1	-1	-1	0.620904	-1	-1	-1	0.761578	0	-1	-1	-1	0	-1	-1	-1	-1	-1	0.895738	-1	-1	-1	-1	-1	-1	0.740565	-1	0.845701	0.692317	-1	-1	-1	-1	-1	-1	-1
g2	-1	0.644797	-1	0.682554	0.810163	-1	-1	-1	0.999053	-1	-1	-1	0	-1	-1	-1	0.542288	-1	-1	-1	0.665214	-1	0.677803	-1	-1	-1	-1	-1	0.596337	-1	-1	-1	-1	0.586102	-1	-1	-1	-1	0.438605	-1	-1	-1	-1	-1	-1	-1	1	-1	-1
hmc	0.770339	-1	-1	0.568443	0.596925	-1	0.558681	-1	-1	-1	-1	-1	0	-1	-1	-1	-1	-1	-1	-1	0	0	0.587858	-1	-1	-1	-1	-1	0	-1	-1	-1	-1	0.408526	0	-1	-1	-1	0.485432	-1	0	-1	-1	-1	-1	-1	1	-1	-1
hyp_4_to_7_bin_1_mid_L2	-1	-1	0.411659	-1	-1	-1	0.404281	-1	0.556006	0.709314	-1	-1	-1	-1	-1	-1	-1	-1	-1	-1	0	0	-1	-1	-1	0	0.676813	0.522276	0.541149	-1	-1	-1	0.543387	-1	-1	-1	-1	-1	0.680116	-1	-1	0.51564	0.664178	-1	-1	-1	-1	0.653322	-1
hyp_4_to_7_bin_2_late_L2	-1	-1	-1	-1	-1	-1	-1	-1	0.665483	0.654014	-1	-1	-1	-1	-1	-1	-1	-1	-1	-1	0	0	-1	-1	-1	-1	-1	-1	0.735859	-1	-1	-1	-1	0.402586	-1	-1	-1	-1	-1	-1	0	-1	-1	-1	-1	-1	-1	-1	-1
hyp_4_to_7_bin_3_around_L2_molt	-1	0.517772	0.315325	0.850993	-1	-1	-1	-1	-1	0.71578	-1	-1	-1	-1	-1	-1	-1	-1	-1	-1	0.527131	0	-1	-1	-1	0.445791	-1	0.57736	0.748716	-1	-1	-1	0.70792	-1	-1	-1	-1	-1	-1	-1	0	0.66412	-1	-1	-1	-1	0.735065	-1	-1
mu_int_mu_anal	-1	0.518061	-1	-1	-1	-1	0.421602	-1	-1	-1	-1	-1	0	-1	-1	-1	-1	-1	-1	-1	0	0	-1	-1	1	0.608037	-1	-1	0.419371	-1	-1	-1	-1	0.698361	-1	-1	-1	-1	-1	-1	0	0	-1	-1	-1	0.824652	0.762583	-1	-1
mu_sph	-1	0.569819	-1	0.558694	-1	-1	-1	0.5929	-1	-1	-1	-1	0	-1	-1	-1	0.576591	-1	-1	-1	-1	0	-1	-1	0.96511	0.744377	-1	-1	0.495942	-1	-1	-1	-1	0.736907	-1	-1	-1	-1	-1	-1	0	0	-1	-1	-1	-1	0.798111	-1	-1
pm1_pm2	0.68064	0.569214	0.482509	0.653893	-1	0.666674	0.437249	-1	0.894288	-1	-1	-1	-1	-1	-1	-1	0.682447	-1	-1	-1	0.65921	0	-1	-1	-1	-1	-1	-1	0.648583	-1	-1	-1	-1	-1	-1	-1	-1	-1	0.532188	-1	0.595789	0.610003	-1	-1	-1	0.753476	-1	-1	-1
pm3_pm4_pm5	0.609072	0.489218	0.533773	-1	-1	-1	-1	-1	0.927886	-1	-1	-1	0.375519	-1	-1	-1	0.618944	-1	-1	-1	0.517383	0	-1	-1	-1	-1	-1	-1	0.588727	-1	-1	-1	-1	0.495768	-1	-1	-1	-1	0.524871	-1	0.564551	0.569966	-1	-1	-1	-1	0.479779	0	-1
pm6_and_possibly_pm7	-1	-1	0.52351	-1	0.742165	0.560297	0.449288	-1	0.894595	-1	-1	-1	-1	-1	-1	-1	0.73987	-1	-1	-1	-1	0	-1	-1	-1	-1	-1	0.243387	0.63401	-1	-1	-1	-1	0.499481	-1	-1	-1	-1	-1	-1	0	0	0.516538	-1	-1	-1	0.686946	0.611435	-1
[truncated: 67 more columns]

## Sheet: s4.Worm_lineage_embryo
CellType	B0310.2	C38D4.7	K09A11.1	M03D4.4	T22C8.4	T23F11.4	Y22D7AL.16	ahr-1	bcl-11	bed-3	blmp-1	ceh-13	ceh-14	ceh-18	ceh-19	ceh-2	ceh-22	ceh-24	ceh-30	ceh-31	ceh-34	ceh-36	ceh-39	ceh-43	ceh-45	ceh-48	ceh-5	ceh-51	ceh-6	ceh-83	ceh-9	ces-1	che-1	cnd-1	cog-1	dmd-4	drap-1	dve-1	elt-1	elt-2	elt-3	elt-4	ets-4	ets-7	eyg-1	fax-1	fkh-10	fkh-6	flh-1
ABalaaaa	-1	-1	0.728533	-1	-1	0.537266	0.253586	-1	-1	-1	-1	-1	-1	-1	-1	-1	-1	-1	-1	-1	-1	-1	-1	0.682143	-1	-1	-1	-1	-1	0	-1	-1	-1	-1	-1	-1	0.175009	-1	-1	-1	-1	-1	-1	-1	-1	-1	-1	-1	0.513445
ABalaaaal	-1	-1	0.794721	-1	0.671319	-1	-1	-1	-1	-1	-1	-1	-1	-1	-1	-1	-1	-1	-1	-1	-1	-1	-1	0.704474	-1	-1	-1	-1	-1	-1	-1	-1	-1	-1	-1	-1	-1	-1	-1	-1	-1	0	-1	-1	-1	-1	-1	-1	0.518468
ABalaaaala	-1	-1	-1	-1	-1	0.518388	-1	-1	-1	-1	-1	-1	-1	-1	-1	-1	-1	-1	-1	-1	-1	-1	-1	0.699011	-1	-1	-1	-1	-1	-1	-1	0	-1	-1	-1	-1	-1	-1	-1	-1	-1	0	-1	-1	-1	-1	-1	-1	0.470995
ABalaapaaa	-1	-1	-1	-1	-1	0.518388	-1	-1	-1	-1	-1	-1	-1	-1	-1	-1	-1	-1	-1	-1	-1	-1	-1	0.699011	-1	-1	-1	-1	-1	-1	-1	0	-1	-1	-1	-1	-1	-1	-1	-1	-1	0	-1	-1	-1	-1	-1	-1	0.470995
ABalaaaalal	-1	-1	-1	-1	-1	0.815981	-1	-1	-1	-1	-1	-1	-1	-1	-1	-1	-1	-1	0.491786	-1	-1	-1	-1	0.823304	-1	0.922834	-1	-1	-1	-1	-1	-1	-1	-1	-1	-1	-1	-1	-1	-1	-1	-1	-1	-1	-1	-1	-1	-1	0.545816
ABalaapaaar	-1	-1	-1	-1	-1	0.815981	-1	-1	-1	-1	-1	-1	-1	-1	-1	-1	-1	-1	0.491786	-1	-1	-1	-1	0.823304	-1	0.922834	-1	-1	-1	-1	-1	-1	-1	-1	-1	-1	-1	-1	-1	-1	-1	-1	-1	-1	-1	-1	-1	-1	0.545816
ABalaaaalp	-1	-1	-1	-1	0.666177	0.518548	-1	-1	-1	-1	-1	-1	-1	-1	-1	-1	-1	-1	-1	-1	-1	-1	-1	0.656043	-1	-1	-1	-1	-1	0.575177	-1	-1	-1	-1	-1	-1	-1	-1	-1	-1	-1	-1	-1	-1	-1	-1	-1	-1	0.500595
ABalaapaap	-1	-1	-1	-1	0.666177	0.518548	-1	-1	-1	-1	-1	-1	-1	-1	-1	-1	-1	-1	-1	-1	-1	-1	-1	0.656043	-1	-1	-1	-1	-1	0.575177	-1	-1	-1	-1	-1	-1	-1	-1	-1	-1	-1	-1	-1	-1	-1	-1	-1	-1	0.500595
ABalaaaar	-1	-1	0.756201	-1	-1	0.602637	-1	-1	-1	-1	-1	-1	-1	-1	-1	-1	-1	-1	-1	-1	-1	-1	-1	0.695831	-1	-1	-1	-1	-1	0	-1	-1	-1	-1	-1	-1	0.483829	-1	-1	-1	-1	-1	-1	-1	-1	-1	-1	-1	0.582651
ABalaaaarl	-1	-1	-1	-1	0.672918	0.479999	-1	-1	-1	-1	-1	-1	-1	-1	-1	-1	-1	-1	-1	-1	-1	-1	0.763391	0.725098	-1	-1	0.504832	-1	-1	-1	-1	-1	-1	0.725629	-1	-1	0	-1	-1	-1	-1	-1	-1	-1	-1	-1	-1	-1	0.508084
ABalaaaarr	-1	-1	-1	-1	0.672918	0.479999	-1	-1	-1	-1	-1	-1	-1	-1	-1	-1	-1	-1	-1	-1	-1	-1	0.763391	0.725098	-1	-1	0.504832	-1	-1	-1	-1	-1	-1	0.725629	-1	-1	0	-1	-1	-1	-1	-1	-1	-1	-1	-1	-1	-1	0.508084
ABalaaaarlp	-1	-1	0.650097	-1	-1	0.662531	-1	0.345962	0.54447	-1	-1	-1	-1	-1	-1	-1	-1	-1	-1	-1	-1	-1	-1	-1	-1	0.8461	0.63515	-1	-1	-1	-1	-1	-1	0.865194	-1	-1	0	-1	-1	-1	-1	0	-1	-1	-1	-1	0.675648	-1	0.588353
ABalaaaarrp	-1	-1	0.650097	-1	-1	0.662531	-1	0.345962	0.54447	-1	-1	-1	-1	-1	-1	-1	-1	-1	-1	-1	-1	-1	-1	-1	-1	0.8461	0.63515	-1	-1	-1	-1	-1	-1	0.865194	-1	-1	0	-1	-1	-1	-1	0	-1	-1	-1	-1	0.675648	-1	0.588353
ABalapppaap	-1	-1	0.650097	-1	-1	0.662531	-1	0.345962	0.54447	-1	-1	-1	-1	-1	-1	-1	-1	-1	-1	-1	-1	-1	-1	-1	-1	0.8461	0.63515	-1	-1	-1	-1	-1	-1	0.865194	-1	-1	0	-1	-1	-1	-1	0	-1	-1	-1	-1	0.675648	-1	0.588353
ABplpappaaa	-1	-1	0.650097	-1	-1	0.662531	-1	0.345962	0.54447	-1	-1	-1	-1	-1	-1	-1	-1	-1	-1	-1	-1	-1	-1	-1	-1	0.8461	0.63515	-1	-1	-1	-1	-1	-1	0.865194	-1	-1	0	-1	-1	-1	-1	0	-1	-1	-1	-1	0.675648	-1	0.588353
ABalaaap	-1	-1	0.758602	-1	0.627799	0.687059	-1	-1	-1	-1	-1	-1	-1	-1	-1	-1	-1	-1	-1	-1	-1	-1	-1	0.679476	-1	-1	-1	-1	-1	-1	-1	-1	-1	-1	-1	-1	0	-1	-1	-1	-1	-1	-1	-1	-1	-1	-1	-1	0.548337
ABalaaapal	0.623971	-1	0.807732	-1	-1	0.503077	-1	-1	-1	-1	-1	-1	-1	-1	-1	-1	-1	-1	-1	-1	-1	-1	-1	0.700685	-1	-1	-1	-1	-1	-1	-1	-1	-1	-1	-1	-1	0	-1	-1	-1	-1	-1	-1	-1	-1	-1	-1	-1	0.522328
ABalaaappr	0.623971	-1	0.807732	-1	-1	0.503077	-1	-1	-1	-1	-1	-1	-1	-1	-1	-1	-1	-1	-1	-1	-1	-1	-1	0.700685	-1	-1	-1	-1	-1	-1	-1	-1	-1	-1	-1	-1	0	-1	-1	-1	-1	-1	-1	-1	-1	-1	-1	-1	0.522328
ABalaaapalr	-1	-1	-1	-1	-1	0.795683	-1	-1	0.557435	-1	-1	-1	-1	-1	-1	-1	-1	-1	0.475065	1	-1	-1	-1	-1	-1	0.97164	-1	-1	-1	-1	-1	-1	-1	0.926672	-1	-1	0	-1	-1	0.756226	-1	-1	-1	-1	-1	-1	-1	-1	-1
ABalaaapprl	-1	-1	-1	-1	-1	0.795683	-1	-1	0.557435	-1	-1	-1	-1	-1	-1	-1	-1	-1	0.475065	1	-1	-1	-1	-1	-1	0.97164	-1	-1	-1	-1	-1	-1	-1	0.926672	-1	-1	0	-1	-1	0.756226	-1	-1	-1	-1	-1	-1	-1	-1	-1
ABalaaapar	-1	-1	-1	-1	0.612647	0.447754	-1	-1	-1	-1	-1	-1	-1	-1	-1	-1	-1	-1	-1	-1	-1	-1	0.782774	0.71735	-1	-1	0	-1	-1	-1	-1	-1	-1	-1	-1	-1	-1	-1	-1	-1	-1	-1	-1	-1	-1	-1	-1	-1	0.405385
ABalaaappl	-1	-1	-1	-1	0.612647	0.447754	-1	-1	-1	-1	-1	-1	-1	-1	-1	-1	-1	-1	-1	-1	-1	-1	0.782774	0.71735	-1	-1	0	-1	-1	-1	-1	-1	-1	-1	-1	-1	-1	-1	-1	-1	-1	-1	-1	-1	-1	-1	-1	-1	0.405385
ABalaaapa	0.536842	-1	0.792963	-1	0.650864	0.538264	-1	-1	-1	-1	-1	-1	-1	-1	-1	-1	-1	-1	-1	-1	-1	-1	0.778164	0.721484	-1	-1	-1	-1	-1	0	-1	-1	-1	-1	-1	-1	0.267408	-1	-1	-1	-1	-1	-1	-1	-1	-1	-1	-1	0.547168
ABalaaapp	0.536842	-1	0.792963	-1	0.650864	0.538264	-1	-1	-1	-1	-1	-1	-1	-1	-1	-1	-1	-1	-1	-1	-1	-1	0.778164	0.721484	-1	-1	-1	-1	-1	0	-1	-1	-1	-1	-1	-1	0.267408	-1	-1	-1	-1	-1	-1	-1	-1	-1	-1	-1	0.547168
ABalaapa	0.546936	-1	-1	-1	-1	0.629308	-1	-1	-1	-1	-1	-1	-1	-1	-1	-1	-1	-1	-1	-1	-1	-1	0.750608	0.701947	-1	-1	-1	-1	-1	0	-1	-1	-1	-1	-1	-1	0	-1	-1	-1	-1	-1	-1	-1	-1	-1	-1	-1	0.568163
ABalaapaa	0.53239	-1	0.729703	-1	-1	-1	-1	-1	-1	-1	-1	-1	-1	-1	-1	-1	-1	-1	-1	-1	-1	-1	0.768941	0.705174	-1	-1	-1	-1	-1	0.439255	-1	0.533578	-1	-1	-1	-1	-1	-1	-1	-1	-1	-1	-1	-1	-1	-1	-1	-1	0.53199
ABalaapap	-1	-1	0.761389	-1	-1	0.551736	-1	-1	-1	-1	-1	-1	-1	-1	-1	-1	-1	-1	-1	-1	-1	-1	-1	0.639937	-1	-1	-1	-1	-1	0.476541	-1	-1	-1	-1	-1	-1	-1	-1	-1	-1	-1	-1	-1	-1	-1	-1	-1	-1	0.557853
ABalppaap	-1	-1	0.761389	-1	-1	0.551736	-1	-1	-1	-1	-1	-1	-1	-1	-1	-1	-1	-1	-1	-1	-1	-1	-1	0.639937	-1	-1	-1	-1	-1	0.476541	-1	-1	-1	-1	-1	-1	-1	-1	-1	-1	-1	-1	-1	-1	-1	-1	-1	-1	0.557853
ABalaapapp	-1	-1	-1	-1	-1	0.539662	-1	-1	-1	-1	-1	-1	-1	-1	-1	-1	-1	-1	-1	-1	-1	-1	-1	0.702256	-1	-1	-1	-1	-1	-1	-1	-1	-1	-1	-1	-1	0.417563	-1	-1	-1	-1	-1	-1	-1	-1	-1	-1	-1	0.528523
ABalppaapp	-1	-1	-1	-1	-1	0.539662	-1	-1	-1	-1	-1	-1	-1	-1	-1	-1	-1	-1	-1	-1	-1	-1	-1	0.702256	-1	-1	-1	-1	-1	-1	-1	-1	-1	-1	-1	-1	0.417563	-1	-1	-1	-1	-1	-1	-1	-1	-1	-1	-1	0.528523
ABalaapp	-1	-1	0.727535	-1	-1	-1	-1	-1	0.363833	-1	-1	-1	-1	-1	-1	-1	-1	-1	-1	-1	-1	-1	-1	0.676449	-1	-1	-1	-1	-1	0.50824	-1	-1	-1	-1	-1	-1	0.368968	-1	-1	0.708212	-1	-1	-1	-1	-1	-1	-1	-1	0.51371
ABalaappa	-1	-1	-1	-1	-1	0.602843	-1	-1	-1	-1	-1	-1	-1	-1	-1	-1	-1	-1	-1	-1	-1	-1	0.761989	0.706943	-1	-1	-1	-1	-1	0	-1	-1	-1	-1	-1	-1	0	-1	-1	-1	-1	-1	-1	-1	-1	-1	-1	-1	0.559689
ABalppaaa	-1	-1	-1	-1	-1	0.602843	-1	-1	-1	-1	-1	-1	-1	-1	-1	-1	-1	-1	-1	-1	-1	-1	0.761989	0.706943	-1	-1	-1	-1	-1	0	-1	-1	-1	-1	-1	-1	0	-1	-1	-1	-1	-1	-1	-1	-1	-1	-1	-1	0.559689
ABalaappap	-1	-1	0.747565	-1	-1	0.523122	-1	-1	-1	-1	-1	-1	-1	-1	-1	-1	-1	-1	-1	-1	-1	-1	-1	0.631121	-1	-1	-1	-1	-1	-1	-1	-1	-1	-1	-1	-1	0	-1	-1	-1	-1	-1	-1	-1	-1	-1	-1	-1	0.504379
ABalppaaap	-1	-1	0.747565	-1	-1	0.523122	-1	-1	-1	-1	-1	-1	-1	-1	-1	-1	-1	-1	-1	-1	-1	-1	-1	0.631121	-1	-1	-1	-1	-1	-1	-1	-1	-1	-1	-1	-1	0	-1	-1	-1	-1	-1	-1	-1	-1	-1	-1	-1	0.504379
ABalaappapa	-1	-1	0.740884	-1	-1	0.752577	-1	-1	0.562574	-1	-1	-1	-1	-1	-1	-1	-1	-1	-1	-1	-1	-1	0.468882	-1	-1	0.837169	-1	-1	-1	-1	-1	-1	-1	-1	-1	-1	0.61491	-1	-1	-1	-1	-1	-1	-1	-1	0.76089	-1	-1	0.57869
ABalppaaapa	-1	-1	0.740884	-1	-1	0.752577	-1	-1	0.562574	-1	-1	-1	-1	-1	-1	-1	-1	-1	-1	-1	-1	-1	0.468882	-1	-1	0.837169	-1	-1	-1	-1	-1	-1	-1	-1	-1	-1	0.61491	-1	-1	-1	-1	-1	-1	-1	-1	0.76089	-1	-1	0.57869
ABalaappp	-1	-1	0.723652	-1	-1	-1	-1	-1	-1	-1	-1	-1	-1	-1	-1	-1	-1	-1	-1	-1	-1	-1	0.72213	0.689033	-1	-1	-1	-1	-1	0	-1	-1	-1	-1	-1	-1	0.377409	-1	-1	-1	-1	0	-1	-1	-1	-1	-1	-1	0.564407
ABalapaap	-1	-1	0.723652	-1	-1	-1	-1	-1	-1	-1	-1	-1	-1	-1	-1	-1	-1	-1	-1	-1	-1	-1	0.72213	0.689033	-1	-1	-1	-1	-1	0	-1	-1	-1	-1	-1	-1	0.377409	-1	-1	-1	-1	0	-1	-1	-1	-1	-1	-1	0.564407
ABalaapppa	-1	-1	0.72232	-1	-1	0.55104	0.367972	-1	-1	-1	-1	-1	-1	-1	-1	-1	-1	-1	-1	-1	-1	-1	-1	0.62128	-1	0.636571	-1	-1	-1	-1	-1	0.587711	-1	-1	-1	-1	-1	-1	-1	0.609201	-1	-1	-1	-1	-1	-1	-1	-1	0.60209
ABalapaapa	-1	-1	0.72232	-1	-1	0.55104	0.367972	-1	-1	-1	-1	-1	-1	-1	-1	-1	-1	-1	-1	-1	-1	-1	-1	0.62128	-1	0.636571	-1	-1	-1	-1	-1	0.587711	-1	-1	-1	-1	-1	-1	-1	0.609201	-1	-1	-1	-1	-1	-1	-1	-1	0.60209
ABalaapppaa	-1	-1	0.741805	-1	-1	0.789939	-1	-1	-1	-1	-1	-1	-1	-1	-1	-1	-1	-1	-1	-1	-1	-1	-1	-1	-1	0.977601	-1	-1	-1	-1	-1	-1	-1	-1	-1	-1	0.630551	-1	-1	-1	-1	-1	0.720381	-1	-1	-1	-1	-1	0.714398
ABalapaapaa	-1	-1	0.741805	-1	-1	0.789939	-1	-1	-1	-1	-1	-1	-1	-1	-1	-1	-1	-1	-1	-1	-1	-1	-1	-1	-1	0.977601	-1	-1	-1	-1	-1	-1	-1	-1	-1	-1	0.630551	-1	-1	-1	-1	-1	0.720381	-1	-1	-1	-1	-1	0.714398
ABalaapppp	-1	-1	0.744207	-1	-1	-1	-1	-1	-1	-1	-1	-1	-1	-1	-1	-1	-1	-1	-1	-1	-1	-1	-1	0.686671	-1	-1	-1	-1	-1	0.551485	-1	-1	-1	-1	-1	-1	0.442623	-1	-1	-1	-1	-1	-1	-1	-1	-1	-1	-1	0.593222
ABalapaapp	-1	-1	0.744207	-1	-1	-1	-1	-1	-1	-1	-1	-1	-1	-1	-1	-1	-1	-1	-1	-1	-1	-1	-1	0.686671	-1	-1	-1	-1	-1	0.551485	-1	-1	-1	-1	-1	-1	0.442623	-1	-1	-1	-1	-1	-1	-1	-1	-1	-1	-1	0.593222
ABalaaa	-1	-1	0.772156	-1	0.625347	-1	-1	-1	-1	-1	-1	-1	-1	-1	-1	-1	-1	-1	-1	-1	-1	-1	-1	0.652228	-1	-1	-1	-1	-1	0	-1	-1	-1	-1	-1	-1	0.483	-1	-1	-1	-1	-1	-1	-1	-1	-1	-1	-1	0.647535
ABalaap	-1	-1	0.772156	-1	0.625347	-1	-1	-1	-1	-1	-1	-1	-1	-1	-1	-1	-1	-1	-1	-1	-1	-1	-1	0.652228	-1	-1	-1	-1	-1	0	-1	-1	-1	-1	-1	-1	0.483	-1	-1	-1	-1	-1	-1	-1	-1	-1	-1	-1	0.647535
ABalapaa	-1	-1	0.733125	-1	0.604878	-1	-1	-1	-1	-1	-1	-1	-1	-1	-1	-1	-1	-1	-1	-1	-1	-1	0.718452	0.713808	-1	-1	-1	-1	-1	0	-1	-1	-1	-1	-1	-1	0.435543	-1	-1	-1	-1	-1	-1	-1	-1	-1	-1	-1	0.629091
ABalappa	-1	-1	0.733125	-1	0.604878	-1	-1	-1	-1	-1	-1	-1	-1	-1	-1	-1	-1	-1	-1	-1	-1	-1	0.718452	0.713808	-1	-1	-1	-1	-1	0	-1	-1	-1	-1	-1	-1	0.435543	-1	-1	-1	-1	-1	-1	-1	-1	-1	-1	-1	0.629091
ABalapaaa	-1	-1	-1	-1	-1	0.502842	-1	-1	-1	-1	-1	-1	-1	-1	-1	-1	-1	-1	0.39987	0.738566	-1	-1	0.685609	0.660359	-1	-1	-1	-1	-1	-1	-1	-1	-1	-1	-1	-1	-1	-1	-1	-1	-1	-1	-1	-1	-1	-1	-1	-1	0.518718
ABalappap	-1	-1	-1	-1	-1	0.418362	-1	-1	-1	-1	-1	-1	-1	-1	-1	-1	-1	-1	0.34495	-1	-1	-1	-1	0.632171	-1	-1	-1	-1	-1	0.432741	-1	-1	-1	-1	-1	-1	0	-1	-1	-1	-1	-1	-1	-1	-1	-1	-1	-1	0.558285
ABalapaaaa	-1	-1	0.776325	-1	-1	0.509642	-1	-1	0.421439	-1	-1	-1	-1	-1	-1	-1	-1	-1	-1	-1	-1	-1	-1	0.562107	-1	0.722016	-1	-1	0.749541	-1	-1	-1	-1	-1	-1	-1	0	-1	-1	-1	-1	-1	-1	-1	-1	-1	-1	-1	0.491503
ABalappapa	-1	-1	0.776325	-1	-1	0.509642	-1	-1	0.421439	-1	-1	-1	-1	-1	-1	-1	-1	-1	-1	-1	-1	-1	-1	0.562107	-1	0.722016	-1	-1	0.749541	-1	-1	-1	-1	-1	-1	-1	0	-1	-1	-1	-1	-1	-1	-1	-1	-1	-1	-1	0.491503
ABalapaaaaa	-1	-1	-1	-1	-1	0.67966	-1	-1	-1	-1	-1	-1	0.683275	-1	-1	-1	-1	-1	-1	-1	-1	-1	0.789702	0.715676	-1	0.858356	-1	-1	0.893116	-1	-1	-1	-1	-1	-1	-1	0.543682	-1	-1	-1	-1	-1	0.491341	-1	-1	-1	-1	-1	0.649787
ABalappapaa	-1	-1	-1	-1	-1	0.67966	-1	-1	-1	-1	-1	-1	0.683275	-1	-1	-1	-1	-1	-1	-1	-1	-1	0.789702	0.715676	-1	0.858356	-1	-1	0.893116	-1	-1	-1	-1	-1	-1	-1	0.543682	-1	-1	-1	-1	-1	0.491341	-1	-1	-1	-1	-1	0.649787
ABalapaaap	-1	-1	0.693388	-1	-1	0.511793	-1	-1	0.334355	-1	-1	-1	-1	-1	-1	-1	-1	-1	0.282694	-1	-1	-1	-1	0.634832	-1	-1	-1	-1	-1	-1	-1	-1	-1	-1	-1	-1	-1	-1	-1	-1	-1	-1	-1	-1	-1	-1	-1	-1	0.487498
ABalappapp	-1	-1	0.693388	-1	-1	0.511793	-1	-1	0.334355	-1	-1	-1	-1	-1	-1	-1	-1	-1	0.282694	-1	-1	-1	-1	0.634832	-1	-1	-1	-1	-1	-1	-1	-1	-1	-1	-1	-1	-1	-1	-1	-1	-1	-1	-1	-1	-1	-1	-1	-1	0.487498
ABalapaaapa	-1	-1	0.68353	-1	-1	0	-1	-1	0.656357	-1	-1	-1	-1	-1	-1	-1	-1	-1	0.474124	-1	-1	-1	-1	0.710127	-1	1	-1	-1	-1	-1	-1	-1	-1	-1	-1	-1	-1	0	-1	-1	-1	-1	-1	-1	-1	-1	-1	0.983284	0.582733
ABalappappa	-1	-1	0.68353	-1	-1	0	-1	-1	0.656357	-1	-1	-1	-1	-1	-1	-1	-1	-1	0.474124	-1	-1	-1	-1	0.710127	-1	1	-1	-1	-1	-1	-1	-1	-1	-1	-1	-1	-1	0	-1	-1	-1	-1	-1	-1	-1	-1	-1	0.983284	0.582733
ABalapapa	-1	-1	-1	-1	-1	-1	-1	-1	-1	-1	-1	-1	-1	0	-1	-1	-1	-1	-1	-1	-1	-1	0.723459	0.723012	-1	-1	-1	-1	-1	-1	-1	-1	-1	-1	-1	-1	0	-1	-1	-1	-1	-1	-1	-1	-1	-1	-1	-1	0.548005
ABalappaa	-1	-1	0.696829	-1	-1	0.614088	-1	-1	-1	-1	-1	-1	-1	-1	-1	-1	-1	-1	-1	-1	-1	-1	0.796641	0.815185	-1	-1	-1	-1	-1	-1	-1	-1	-1	-1	-1	-1	-1	-1	-1	0.73778	-1	-1	-1	-1	-1	-1	-1	-1	0.558659
ABalappaap	-1	-1	0.656187	-1	-1	0.653448	-1	-1	-1	-1	-1	-1	-1	-1	-1	-1	-1	-1	-1	-1	-1	-1	0.68652	0.766213	-1	0.690906	-1	-1	-1	0.645996	-1	-1	-1	0.918944	-1	-1	0	-1	-1	-1	-1	-1	-1	-1	-1	-1	-1	-1	0.624858
ABalappaapa	-1	-1	0.520105	-1	-1	0.742976	-1	-1	-1	-1	-1	-1	-1	-1	-1	-1	-1	-1	-1	-1	-1	-1	-1	-1	-1	0.9709	-1	-1	-1	-1	-1	-1	-1	1	-1	-1	-1	-1	-1	-1	-1	-1	-1	-1	-1	-1	-1	-1	-1
ABalapppa	-1	-1	0.78932	-1	-1	-1	-1	-1	-1	-1	-1	-1	-1	-1	-1	-1	-1	-1	-1	-1	-1	-1	0.758858	0.793066	-1	-1	-1	-1	-1	0	-1	-1	-1	-1	-1	-1	-1	-1	-1	-1	-1	-1	-1	-1	-1	-1	-1	-1	0.623742
ABalapppaa	-1	-1	0.736065	-1	-1	0.631188	-1	-1	-1	-1	-1	-1	0	-1	-1	-1	-1	-1	-1	-1	-1	-1	-1	0.671938	-1	0.703108	-1	-1	-1	-1	-1	0	-1	-1	-1	-1	0	-1	-1	-1	-1	-1	-1	-1	-1	-1	-1	-1	0.608616
ABalapppaaa	-1	-1	-1	-1	-1	0.745296	-1	-1	-1	-1	-1	-1	0.646577	-1	-1	-1	-1	-1	-1	-1	-1	-1	-1	-1	-1	0.978469	-1	-1	-1	-1	-1	-1	-1	-1	-1	-1	0	-1	-1	-1	-1	-1	-1	-1	-1	-1	-1	-1	0.660149
ABalapa	-1	-1	0.803132	-1	0.496183	-1	-1	-1	-1	-1	-1	0.472019	-1	-1	-1	-1	-1	-1	-1	-1	-1	-1	0.713885	0.694006	-1	-1	-1	-1	-1	0	-1	-1	-1	-1	-1	-1	0.391629	-1	0.522566	-1	-1	-1	-1	-1	-1	-1	-1	-1	0.691976
ABalapp	-1	-1	0.803132	-1	0.496183	-1	-1	-1	-1	-1	-1	0.472019	-1	-1	-1	-1	-1	-1	-1	-1	-1	-1	0.713885	0.694006	-1	-1	-1	-1	-1	0	-1	-1	-1	-1	-1	-1	0.391629	-1	0.522566	-1	-1	-1	-1	-1	-1	-1	-1	-1	0.691976
ABalapap	-1	-1	0.743489	-1	-1	0.674393	-1	-1	0.51529	-1	-1	-1	-1	-1	-1	-1	-1	-1	-1	-1	-1	-1	-1	0.684669	-1	-1	-1	-1	-1	0	-1	-1	-1	-1	-1	-1	-1	-1	-1	-1	-1	-1	-1	-1	-1	-1	-1	-1	0.624097
ABalappp	-1	-1	0.743489	-1	-1	0.674393	-1	-1	0.51529	-1	-1	-1	-1	-1	-1	-1	-1	-1	-1	-1	-1	-1	-1	0.684669	-1	-1	-1	-1	-1	0	-1	-1	-1	-1	-1	-1	-1	-1	-1	-1	-1	-1	-1	-1	-1	-1	-1	-1	0.624097
ABalapapap	-1	-1	0.729058	-1	-1	0.616375	-1	-1	-1	-1	-1	-1	-1	-1	-1	-1	-1	-1	-1	-1	-1	-1	-1	0.553653	-1	-1	-1	-1	-1	0.571514	-1	-1	-1	-1	-1	-1	-1	-1	-1	-1	-1	-1	-1	-1	-1	-1	-1	-1	0.616917
ABalapppap	-1	-1	0.729058	-1	-1	0.616375	-1	-1	-1	-1	-1	-1	-1	-1	-1	-1	-1	-1	-1	-1	-1	-1	-1	0.553653	-1	-1	-1	-1	-1	0.571514	-1	-1	-1	-1	-1	-1	-1	-1	-1	-1	-1	-1	-1	-1	-1	-1	-1	-1	0.616917
ABplpaaapp	-1	-1	0.657645	-1	-1	-1	-1	-1	-1	-1	-1	-1	-1	-1	-1	-1	-1	-1	-1	-1	-1	-1	0.651592	-1	-1	-1	-1	-1	-1	0.648969	-1	-1	-1	-1	-1	-1	0.673761	-1	-1	-1	-1	-1	-1	-1	-1	-1	-1	-1	0.624755
ABprpaaapp	-1	-1	0.657645	-1	-1	-1	-1	-1	-1	-1	-1	-1	-1	-1	-1	-1	-1	-1	-1	-1	-1	-1	0.651592	-1	-1	-1	-1	-1	-1	0.648969	-1	-1	-1	-1	-1	-1	0.673761	-1	-1	-1	-1	-1	-1	-1	-1	-1	-1	-1	0.624755
ABalapapapa	-1	-1	0.605968	-1	-1	0.6909	-1	-1	-1	-1	-1	-1	-1	-1	-1	-1	-1	-1	-1	-1	-1	-1	0.527796	-1	-1	0.691616	-1	-1	-1	-1	-1	-1	-1	-1	-1	-1	0.543269	-1	-1	-1	-1	-1	-1	-1	-1	-1	-1	-1	0.597445
ABalapppapa	-1	-1	0.605968	-1	-1	0.6909	-1	-1	-1	-1	-1	-1	-1	-1	-1	-1	-1	-1	-1	-1	-1	-1	0.527796	-1	-1	0.691616	-1	-1	-1	-1	-1	-1	-1	-1	-1	-1	0.543269	-1	-1	-1	-1	-1	-1	-1	-1	-1	-1	-1	0.597445
ABplpaaappa	-1	-1	0.605968	-1	-1	0.6909	-1	-1	-1	-1	-1	-1	-1	-1	-1	-1	-1	-1	-1	-1	-1	-1	0.527796	-1	-1	0.691616	-1	-1	-1	-1	-1	-1	-1	-1	-1	-1	0.543269	-1	-1	-1	-1	-1	-1	-1	-1	-1	-1	-1	0.597445
ABprpaaappa	-1	-1	0.605968	-1	-1	0.6909	-1	-1	-1	-1	-1	-1	-1	-1	-1	-1	-1	-1	-1	-1	-1	-1	0.527796	-1	-1	0.691616	-1	-1	-1	-1	-1	-1	-1	-1	-1	-1	0.543269	-1	-1	-1	-1	-1	-1	-1	-1	-1	-1	-1	0.597445
ABalapapapaa	-1	-1	0.780139	-1	-1	0.94213	-1	-1	0.535071	-1	-1	-1	-1	-1	-1	-1	-1	-1	-1	-1	-1	-1	-1	-1	-1	1	-1	-1	-1	-1	-1	-1	-1	-1	-1	-1	0.662573	-1	-1	-1	-1	-1	-1	-1	-1	-1	-1	-1	-1
ABalapppapaa	-1	-1	0.780139	-1	-1	0.94213	-1	-1	0.535071	-1	-1	-1	-1	-1	-1	-1	-1	-1	-1	-1	-1	-1	-1	-1	-1	1	-1	-1	-1	-1	-1	-1	-1	-1	-1	-1	0.662573	-1	-1	-1	-1	-1	-1	-1	-1	-1	-1	-1	-1
ABplpaaappaa	-1	-1	0.780139	-1	-1	0.94213	-1	-1	0.535071	-1	-1	-1	-1	-1	-1	-1	-1	-1	-1	-1	-1	-1	-1	-1	-1	1	-1	-1	-1	-1	-1	-1	-1	-1	-1	-1	0.662573	-1	-1	-1	-1	-1	-1	-1	-1	-1	-1	-1	-1
ABprpaaappaa	-1	-1	0.780139	-1	-1	0.94213	-1	-1	0.535071	-1	-1	-1	-1	-1	-1	-1	-1	-1	-1	-1	-1	-1	-1	-1	-1	1	-1	-1	-1	-1	-1	-1	-1	-1	-1	-1	0.662573	-1	-1	-1	-1	-1	-1	-1	-1	-1	-1	-1	-1
ABalapapp	-1	-1	0.796162	-1	-1	0.609119	-1	-1	-1	-1	-1	-1	-1	-1	-1	-1	-1	-1	-1	-1	-1	-1	-1	0.672455	-1	-1	-1	-1	-1	0.527503	-1	-1	-1	-1	-1	-1	0.387435	-1	-1	-1	-1	-1	-1	-1	-1	-1	-1	-1	0.639599
ABalapppp	-1	-1	0.796162	-1	-1	0.609119	-1	-1	-1	-1	-1	-1	-1	-1	-1	-1	-1	-1	-1	-1	-1	-1	-1	0.672455	-1	-1	-1	-1	-1	0.527503	-1	-1	-1	-1	-1	-1	0.387435	-1	-1	-1	-1	-1	-1	-1	-1	-1	-1	-1	0.639599
ABalapappa	0.566093	-1	0.765583	-1	-1	0.545049	-1	-1	-1	-1	-1	-1	-1	-1	-1	-1	-1	-1	-1	-1	-1	-1	0.740073	0.698744	-1	-1	-1	-1	-1	-1	-1	-1	-1	-1	-1	-1	0	-1	-1	-1	-1	-1	-1	-1	-1	-1	-1	-1	0.56891
ABalappppa	0.566093	-1	0.765583	-1	-1	0.545049	-1	-1	-1	-1	-1	-1	-1	-1	-1	-1	-1	-1	-1	-1	-1	-1	0.740073	0.698744	-1	-1	-1	-1	-1	-1	-1	-1	-1	-1	-1	-1	0	-1	-1	-1	-1	-1	-1	-1	-1	-1	-1	-1	0.56891
ABalppappp	-1	-1	-1	-1	-1	0.670893	-1	-1	-1	-1	-1	-1	-1	-1	-1	-1	-1	-1	-1	-1	-1	-1	-1	0.709545	-1	0.663676	-1	-1	-1	0.592417	-1	-1	-1	-1	-1	-1	0.605829	-1	-1	-1	-1	-1	-1	-1	-1	-1	-1	-1	0.614268
ABarappppp	-1	-1	-1	-1	-1	0.670893	-1	-1	-1	-1	-1	-1	-1	-1	-1	-1	-1	-1	-1	-1	-1	-1	-1	0.709545	-1	0.663676	-1	-1	-1	0.592417	-1	-1	-1	-1	-1	-1	0.605829	-1	-1	-1	-1	-1	-1	-1	-1	-1	-1	-1	0.614268
ABalapappaa	-1	-1	0.635969	-1	-1	0.700636	-1	-1	0.605348	-1	-1	0.640049	-1	-1	-1	-1	-1	-1	-1	-1	-1	-1	-1	0.740786	-1	0.716191	-1	-1	-1	0.606577	-1	-1	-1	-1	-1	-1	0.590267	-1	-1	-1	-1	-1	-1	-1	-1	-1	-1	-1	0.632344
ABalappppaa	-1	-1	0.635969	-1	-1	0.700636	-1	-1	0.605348	-1	-1	0.640049	-1	-1	-1	-1	-1	-1	-1	-1	-1	-1	-1	0.740786	-1	0.716191	-1	-1	-1	0.606577	-1	-1	-1	-1	-1	-1	0.590267	-1	-1	-1	-1	-1	-1	-1	-1	-1	-1	-1	0.632344
ABalaappppa	-1	-1	0.635969	-1	-1	0.700636	-1	-1	0.605348	-1	-1	0.640049	-1	-1	-1	-1	-1	-1	-1	-1	-1	-1	-1	0.740786	-1	0.716191	-1	-1	-1	0.606577	-1	-1	-1	-1	-1	-1	0.590267	-1	-1	-1	-1	-1	-1	-1	-1	-1	-1	-1	0.632344
ABalapaappa	-1	-1	0.635969	-1	-1	0.700636	-1	-1	0.605348	-1	-1	0.640049	-1	-1	-1	-1	-1	-1	-1	-1	-1	-1	-1	0.740786	-1	0.716191	-1	-1	-1	0.606577	-1	-1	-1	-1	-1	-1	0.590267	-1	-1	-1	-1	-1	-1	-1	-1	-1	-1	-1	0.632344
ABalppapppa	-1	-1	0.635969	-1	-1	0.700636	-1	-1	0.605348	-1	-1	0.640049	-1	-1	-1	-1	-1	-1	-1	-1	-1	-1	-1	0.740786	-1	0.716191	-1	-1	-1	0.606577	-1	-1	-1	-1	-1	-1	0.590267	-1	-1	-1	-1	-1	-1	-1	-1	-1	-1	-1	0.632344
ABarapppppa	-1	-1	0.635969	-1	-1	0.700636	-1	-1	0.605348	-1	-1	0.640049	-1	-1	-1	-1	-1	-1	-1	-1	-1	-1	-1	0.740786	-1	0.716191	-1	-1	-1	0.606577	-1	-1	-1	-1	-1	-1	0.590267	-1	-1	-1	-1	-1	-1	-1	-1	-1	-1	-1	0.632344
ABalapappaaa	-1	-1	-1	-1	-1	-1	-1	-1	-1	1	-1	-1	-1	0.649455	-1	-1	-1	-1	-1	-1	-1	-1	-1	0.935811	-1	0.99693	-1	-1	-1	-1	-1	-1	-1	-1	-1	-1	-1	-1	-1	-1	-1	-1	-1	-1	-1	-1	-1	-1	0.753546
ABalappppaaa	-1	-1	-1	-1	-1	-1	-1	-1	-1	1	-1	-1	-1	0.649455	-1	-1	-1	-1	-1	-1	-1	-1	-1	0.935811	-1	0.99693	-1	-1	-1	-1	-1	-1	-1	-1	-1	-1	-1	-1	-1	-1	-1	-1	-1	-1	-1	-1	-1	-1	0.753546
ABalaappppaa	-1	-1	-1	-1	-1	-1	-1	-1	-1	1	-1	-1	-1	0.649455	-1	-1	-1	-1	-1	-1	-1	-1	-1	0.935811	-1	0.99693	-1	-1	-1	-1	-1	-1	-1	-1	-1	-1	-1	-1	-1	-1	-1	-1	-1	-1	-1	-1	-1	-1	0.753546
ABalapaappaa	-1	-1	-1	-1	-1	-1	-1	-1	-1	1	-1	-1	-1	0.649455	-1	-1	-1	-1	-1	-1	-1	-1	-1	0.935811	-1	0.99693	-1	-1	-1	-1	-1	-1	-1	-1	-1	-1	-1	-1	-1	-1	-1	-1	-1	-1	-1	-1	-1	-1	0.753546
ABalppapppaa	-1	-1	-1	-1	-1	-1	-1	-1	-1	1	-1	-1	-1	0.649455	-1	-1	-1	-1	-1	-1	-1	-1	-1	0.935811	-1	0.99693	-1	-1	-1	-1	-1	-1	-1	-1	-1	-1	-1	-1	-1	-1	-1	-1	-1	-1	-1	-1	-1	-1	0.753546
ABarapppppaa	-1	-1	-1	-1	-1	-1	-1	-1	-1	1	-1	-1	-1	0.649455	-1	-1	-1	-1	-1	-1	-1	-1	-1	0.935811	-1	0.99693	-1	-1	-1	-1	-1	-1	-1	-1	-1	-1	-1	-1	-1	-1	-1	-1	-1	-1	-1	-1	-1	-1	0.753546
ABalapappap	-1	-1	0.767989	-1	-1	0.767312	-1	-1	0.602935	-1	-1	-1	-1	-1	-1	-1	-1	-1	0.504338	0.766703	-1	-1	-1	0.817937	-1	0.861669	-1	-1	-1	-1	-1	-1	-1	-1	-1	-1	-1	-1	-1	-1	-1	-1	-1	-1	-1	-1	-1	-1	0.680473
ABalappppap	-1	-1	0.767989	-1	-1	0.767312	-1	-1	0.602935	-1	-1	-1	-1	-1	-1	-1	-1	-1	0.504338	0.766703	-1	-1	-1	0.817937	-1	0.861669	-1	-1	-1	-1	-1	-1	-1	-1	-1	-1	-1	-1	-1	-1	-1	-1	-1	-1	-1	-1	-1	-1	0.680473
ABalaappppp	-1	-1	0.767989	-1	-1	0.767312	-1	-1	0.602935	-1	-1	-1	-1	-1	-1	-1	-1	-1	0.504338	0.766703	-1	-1	-1	0.817937	-1	0.861669	-1	-1	-1	-1	-1	-1	-1	-1	-1	-1	-1	-1	-1	-1	-1	-1	-1	-1	-1	-1	-1	-1	0.680473
ABalapaappp	-1	-1	0.767989	-1	-1	0.767312	-1	-1	0.602935	-1	-1	-1	-1	-1	-1	-1	-1	-1	0.504338	0.766703	-1	-1	-1	0.817937	-1	0.861669	-1	-1	-1	-1	-1	-1	-1	-1	-1	-1	-1	-1	-1	-1	-1	-1	-1	-1	-1	-1	-1	-1	0.680473
ABalppapppp	-1	-1	0.767989	-1	-1	0.767312	-1	-1	0.602935	-1	-1	-1	-1	-1	-1	-1	-1	-1	0.504338	0.766703	-1	-1	-1	0.817937	-1	0.861669	-1	-1	-1	-1	-1	-1	-1	-1	-1	-1	-1	-1	-1	-1	-1	-1	-1	-1	-1	-1	-1	-1	0.680473
ABarapppppp	-1	-1	0.767989	-1	-1	0.767312	-1	-1	0.602935	-1	-1	-1	-1	-1	-1	-1	-1	-1	0.504338	0.766703	-1	-1	-1	0.817937	-1	0.861669	-1	-1	-1	-1	-1	-1	-1	-1	-1	-1	-1	-1	-1	-1	-1	-1	-1	-1	-1	-1	-1	-1	0.680473
ABalapappp	-1	-1	0.818844	-1	-1	0.510805	-1	-1	-1	-1	-1	-1	-1	-1	-1	-1	-1	-1	-1	-1	-1	-1	0.736251	0.747848	-1	-1	-1	-1	-1	-1	-1	0.555749	-1	-1	-1	-1	0.392288	-1	-1	-1	-1	-1	-1	-1	-1	-1	-1	-1	0.565499
ABalappppp	-1	-1	0.818844	-1	-1	0.510805	-1	-1	-1	-1	-1	-1	-1	-1	-1	-1	-1	-1	-1	-1	-1	-1	0.736251	0.747848	-1	-1	-1	-1	-1	-1	-1	0.555749	-1	-1	-1	-1	0.392288	-1	-1	-1	-1	-1	-1	-1	-1	-1	-1	-1	0.565499
ABalapapppa	-1	-1	0.539464	-1	-1	0.616215	-1	-1	0.325054	-1	-1	-1	-1	-1	-1	-1	-1	-1	-1	-1	-1	-1	-1	0.806266	-1	0.902028	-1	-1	-1	-1	-1	-1	-1	-1	-1	-1	0	-1	-1	-1	-1	-1	-1	-1	-1	-1	-1	-1	0.564485
ABalapppppa	-1	-1	0.539464	-1	-1	0.616215	-1	-1	0.325054	-1	-1	-1	-1	-1	-1	-1	-1	-1	-1	-1	-1	-1	-1	0.806266	-1	0.902028	-1	-1	-1	-1	-1	-1	-1	-1	-1	-1	0	-1	-1	-1	-1	-1	-1	-1	-1	-1	-1	-1	0.564485
ABalapapppp	-1	-1	-1	-1	-1	0.648159	-1	-1	-1	0.685473	0.97526	-1	-1	-1	-1	-1	-1	-1	0.511791	0.784574	-1	-1	-1	0.838025	-1	-1	-1	-1	-1	-1	-1	-1	-1	-1	-1	-1	0	-1	-1	-1	-1	-1	0.408487	-1	-1	-1	-1	-1	-1
ABalapppppp	-1	-1	-1	-1	-1	0.648159	-1	-1	-1	0.685473	0.97526	-1	-1	-1	-1	-1	-1	-1	0.511791	0.784574	-1	-1	-1	0.838025	-1	-1	-1	-1	-1	-1	-1	-1	-1	-1	-1	-1	0	-1	-1	-1	-1	-1	0.408487	-1	-1	-1	-1	-1	-1
ABalaapappp	-1	-1	-1	-1	-1	0.648159	-1	-1	-1	0.685473	0.97526	-1	-1	-1	-1	-1	-1	-1	0.511791	0.784574	-1	-1	-1	0.838025	-1	-1	-1	-1	-1	-1	-1	-1	-1	-1	-1	-1	0	-1	-1	-1	-1	-1	0.408487	-1	-1	-1	-1	-1	-1
ABalppaappp	-1	-1	-1	-1	-1	0.648159	-1	-1	-1	0.685473	0.97526	-1	-1	-1	-1	-1	-1	-1	0.511791	0.784574	-1	-1	-1	0.838025	-1	-1	-1	-1	-1	-1	-1	-1	-1	-1	-1	-1	0	-1	-1	-1	-1	-1	0.408487	-1	-1	-1	-1	-1	-1
ABalpaaa	-1	-1	-1	-1	0.606522	0.609085	-1	-1	-1	-1	-1	-1	-1	-1	-1	-1	-1	-1	-1	-1	-1	-1	-1	0.580264	0.368693	-1	-1	-1	-1	0.439484	-1	-1	-1	-1	-1	-1	0.492957	-1	-1	-1	-1	-1	-1	-1	-1	-1	-1	-1	0.542873
ABarapaa	-1	-1	-1	-1	0.606522	0.609085	-1	-1	-1	-1	-1	-1	-1	-1	-1	-1	-1	-1	-1	-1	-1	-1	-1	0.580264	0.368693	-1	-1	-1	-1	0.439484	-1	-1	-1	-1	-1	-1	0.492957	-1	-1	-1	-1	-1	-1	-1	-1	-1	-1	-1	0.542873
ABalpaaaa	-1	-1	0.754142	-1	-1	0.562803	-1	-1	-1	-1	-1	-1	-1	-1	-1	-1	-1	-1	-1	-1	0.581511	-1	-1	-1	0.396377	-1	-1	-1	-1	0.532707	-1	-1	-1	-1	-1	-1	0.482247	-1	-1	-1	-1	0	-1	-1	-1	-1	-1	-1	0.564331
ABarapaaa	-1	-1	0.754142	-1	-1	0.562803	-1	-1	-1	-1	-1	-1	-1	-1	-1	-1	-1	-1	-1	-1	0.581511	-1	-1	-1	0.396377	-1	-1	-1	-1	0.532707	-1	-1	-1	-1	-1	-1	0.482247	-1	-1	-1	-1	0	-1	-1	-1	-1	-1	-1	0.564331
ABalpaaaaa	0.651274	-1	0.732012	0.515865	-1	0.554559	-1	-1	0.410454	-1	-1	-1	-1	-1	-1	-1	-1	-1	-1	-1	0.678177	-1	-1	-1	-1	-1	-1	-1	-1	-1	-1	-1	-1	-1	-1	-1	-1	-1	-1	-1	-1	-1	-1	-1	-1	-1	-1	-1	0.574472
ABarapaaaa	0.651274	-1	0.732012	0.515865	-1	0.554559	-1	-1	0.410454	-1	-1	-1	-1	-1	-1	-1	-1	-1	-1	-1	0.678177	-1	-1	-1	-1	-1	-1	-1	-1	-1	-1	-1	-1	-1	-1	-1	-1	-1	-1	-1	-1	-1	-1	-1	-1	-1	-1	-1	0.574472
ABalpaaaap	-1	-1	0.703882	0.401582	-1	0.54163	-1	-1	-1	-1	-1	-1	-1	-1	-1	-1	-1	-1	0.386554	-1	0.491364	-1	0.657162	-1	-1	-1	-1	-1	-1	-1	-1	-1	-1	-1	-1	-1	0.475016	-1	-1	-1	-1	-1	-1	-1	0.631934	-1	-1	-1	0.482969
ABarapaaap	-1	-1	0.703882	0.401582	-1	0.54163	-1	-1	-1	-1	-1	-1	-1	-1	-1	-1	-1	-1	0.386554	-1	0.491364	-1	0.657162	-1	-1	-1	-1	-1	-1	-1	-1	-1	-1	-1	-1	-1	0.475016	-1	-1	-1	-1	-1	-1	-1	0.631934	-1	-1	-1	0.482969
ABalpaaap	-1	-1	0.780969	-1	-1	-1	-1	-1	0.272758	-1	-1	-1	-1	-1	-1	-1	-1	-1	0.424158	-1	-1	0.61645	-1	-1	-1	-1	-1	-1	-1	0.526693	-1	-1	-1	-1	-1	-1	0.472539	-1	-1	-1	-1	-1	-1	-1	-1	-1	-1	-1	0.568798
ABarapaap	-1	-1	0.780969	-1	-1	-1	-1	-1	0.272758	-1	-1	-1	-1	-1	-1	-1	-1	-1	0.424158	-1	-1	0.61645	-1	-1	-1	-1	-1	-1	-1	0.526693	-1	-1	-1	-1	-1	-1	0.472539	-1	-1	-1	-1	-1	-1	-1	-1	-1	-1	-1	0.568798
ABalpaaapa	-1	-1	0.801005	0.396689	-1	0.478841	-1	-1	-1	-1	-1	-1	-1	-1	-1	0.847871	-1	-1	-1	-1	0.548779	-1	0.623919	-1	-1	-1	-1	-1	-1	-1	-1	-1	-1	-1	-1	-1	0.521889	-1	-1	-1	-1	-1	-1	-1	-1	-1	-1	-1	0.566071
ABarapaapa	-1	-1	0.801005	0.396689	-1	0.478841	-1	-1	-1	-1	-1	-1	-1	-1	-1	0.847871	-1	-1	-1	-1	0.548779	-1	0.623919	-1	-1	-1	-1	-1	-1	-1	-1	-1	-1	-1	-1	-1	0.521889	-1	-1	-1	-1	-1	-1	-1	-1	-1	-1	-1	0.566071
ABalpaaapp	-1	-1	0.800505	-1	-1	-1	-1	-1	-1	-1	-1	-1	-1	-1	-1	-1	-1	-1	-1	-1	-1	0.645801	-1	-1	-1	-1	-1	-1	-1	0.557174	-1	-1	-1	-1	-1	-1	0	-1	-1	-1	-1	0	-1	-1	-1	-1	-1	-1	0.56322
ABarapaapp	-1	-1	0.800505	-1	-1	-1	-1	-1	-1	-1	-1	-1	-1	-1	-1	-1	-1	-1	-1	-1	-1	0.645801	-1	-1	-1	-1	-1	-1	-1	0.557174	-1	-1	-1	-1	-1	-1	0	-1	-1	-1	-1	0	-1	-1	-1	-1	-1	-1	0.56322
ABalpaap	-1	-1	0.757918	-1	-1	0.724195	-1	-1	-1	-1	-1	-1	-1	-1	0.808102	-1	-1	-1	-1	-1	-1	-1	0.650765	-1	0.358574	-1	-1	-1	-1	-1	-1	-1	-1	-1	-1	-1	0.481412	-1	-1	0.518386	-1	-1	0.641355	-1	-1	-1	-1	-1	0.586908
ABaraaap	-1	-1	0.757918	-1	-1	0.724195	-1	-1	-1	-1	-1	-1	-1	-1	0.808102	-1	-1	-1	-1	-1	-1	-1	0.650765	-1	0.358574	-1	-1	-1	-1	-1	-1	-1	-1	-1	-1	-1	0.481412	-1	-1	0.518386	-1	-1	0.641355	-1	-1	-1	-1	-1	0.586908
ABalpaapa	0.608707	-1	0.765816	-1	0.717901	0.586454	-1	-1	-1	-1	-1	-1	-1	-1	-1	-1	-1	-1	-1	-1	-1	0.631675	-1	-1	0.344875	-1	-1	-1	-1	0.550861	-1	-1	-1	-1	-1	-1	0.46663	-1	-1	-1	-1	-1	-1	-1	-1	-1	-1	-1	0.630725
ABaraaapa	0.608707	-1	0.765816	-1	0.717901	0.586454	-1	-1	-1	-1	-1	-1	-1	-1	-1	-1	-1	-1	-1	-1	-1	0.631675	-1	-1	0.344875	-1	-1	-1	-1	0.550861	-1	-1	-1	-1	-1	-1	0.46663	-1	-1	-1	-1	-1	-1	-1	-1	-1	-1	-1	0.630725
ABalpaapaa	0.61728	-1	0.735176	-1	-1	0.558691	-1	-1	-1	-1	-1	-1	-1	-1	-1	-1	-1	-1	-1	-1	-1	-1	-1	-1	0.411778	-1	-1	-1	-1	0.563741	-1	-1	-1	-1	-1	-1	-1	-1	-1	-1	-1	0	-1	-1	-1	-1	-1	-1	0.613587
ABaraaapaa	0.61728	-1	0.735176	-1	-1	0.558691	-1	-1	-1	-1	-1	-1	-1	-1	-1	-1	-1	-1	-1	-1	-1	-1	-1	-1	0.411778	-1	-1	-1	-1	0.563741	-1	-1	-1	-1	-1	-1	-1	-1	-1	-1	-1	0	-1	-1	-1	-1	-1	-1	0.613587
ABalpaapaaa	-1	-1	0.693115	-1	-1	-1	0.809496	-1	-1	0.42162	-1	-1	-1	-1	-1	-1	-1	-1	-1	-1	-1	-1	-1	-1	-1	-1	-1	-1	-1	-1	-1	-1	-1	-1	-1	-1	-1	0.535779	-1	-1	-1	-1	-1	-1	-1	-1	-1	-1	-1
ABalpaappap	-1	-1	0.693115	-1	-1	-1	0.809496	-1	-1	0.42162	-1	-1	-1	-1	-1	-1	-1	-1	-1	-1	-1	-1	-1	-1	-1	-1	-1	-1	-1	-1	-1	-1	-1	-1	-1	-1	-1	0.535779	-1	-1	-1	-1	-1	-1	-1	-1	-1	-1	-1
ABaraaapaaa	-1	-1	0.693115	-1	-1	-1	0.809496	-1	-1	0.42162	-1	-1	-1	-1	-1	-1	-1	-1	-1	-1	-1	-1	-1	-1	-1	-1	-1	-1	-1	-1	-1	-1	-1	-1	-1	-1	-1	0.535779	-1	-1	-1	-1	-1	-1	-1	-1	-1	-1	-1
ABaraaappaa	-1	-1	0.693115	-1	-1	-1	0.809496	-1	-1	0.42162	-1	-1	-1	-1	-1	-1	-1	-1	-1	-1	-1	-1	-1	-1	-1	-1	-1	-1	-1	-1	-1	-1	-1	-1	-1	-1	-1	0.535779	-1	-1	-1	-1	-1	-1	-1	-1	-1	-1	-1
ABaraaappap	-1	-1	0.693115	-1	-1	-1	0.809496	-1	-1	0.42162	-1	-1	-1	-1	-1	-1	-1	-1	-1	-1	-1	-1	-1	-1	-1	-1	-1	-1	-1	-1	-1	-1	-1	-1	-1	-1	-1	0.535779	-1	-1	-1	-1	-1	-1	-1	-1	-1	-1	-1
ABarapapapa	-1	-1	0.693115	-1	-1	-1	0.809496	-1	-1	0.42162	-1	-1	-1	-1	-1	-1	-1	-1	-1	-1	-1	-1	-1	-1	-1	-1	-1	-1	-1	-1	-1	-1	-1	-1	-1	-1	-1	0.535779	-1	-1	-1	-1	-1	-1	-1	-1	-1	-1	-1
ABalpaapap	-1	-1	0.807102	0	0.75523	0.66718	-1	-1	-1	-1	-1	-1	-1	-1	-1	-1	-1	-1	-1	-1	-1	-1	-1	-1	-1	-1	-1	-1	-1	-1	-1	-1	-1	-1	-1	-1	0.392531	-1	-1	-1	-1	-1	-1	-1	-1	-1	-1	0.55796	0.622237
ABaraaapap	-1	-1	0.807102	0	0.75523	0.66718	-1	-1	-1	-1	-1	-1	-1	-1	-1	-1	-1	-1	-1	-1	-1	-1	-1	-1	-1	-1	-1	-1	-1	-1	-1	-1	-1	-1	-1	-1	0.392531	-1	-1	-1	-1	-1	-1	-1	-1	-1	-1	0.55796	0.622237
ABalpaapapa	-1	-1	0.723068	0	-1	0.714104	-1	-1	-1	-1	-1	-1	-1	-1	-1	0.96281	-1	-1	-1	-1	0	-1	-1	-1	0.371543	-1	-1	-1	-1	0.633045	-1	-1	-1	-1	-1	-1	0.698314	0.541772	-1	-1	-1	-1	-1	-1	-1	-1	-1	0.581086	0.663655
ABaraaapapa	-1	-1	0.723068	0	-1	0.714104	-1	-1	-1	-1	-1	-1	-1	-1	-1	0.96281	-1	-1	-1	-1	0	-1	-1	-1	0.371543	-1	-1	-1	-1	0.633045	-1	-1	-1	-1	-1	-1	0.698314	0.541772	-1	-1	-1	-1	-1	-1	-1	-1	-1	0.581086	0.663655
ABalpappppa	-1	-1	0.723068	0	-1	0.714104	-1	-1	-1	-1	-1	-1	-1	-1	-1	0.96281	-1	-1	-1	-1	0	-1	-1	-1	0.371543	-1	-1	-1	-1	0.633045	-1	-1	-1	-1	-1	-1	0.698314	0.541772	-1	-1	-1	-1	-1	-1	-1	-1	-1	0.581086	0.663655
ABalpaapp	-1	-1	0.760429	-1	-1	-1	-1	-1	-1	-1	-1	-1	-1	0	-1	-1	-1	-1	-1	-1	-1	-1	-1	-1	0.253172	-1	-1	-1	-1	0.526995	-1	-1	-1	-1	-1	-1	0.527467	-1	-1	-1	-1	-1	-1	-1	-1	-1	-1	-1	0.591555
ABaraaapp	-1	-1	0.760429	-1	-1	-1	-1	-1	-1	-1	-1	-1	-1	0	-1	-1	-1	-1	-1	-1	-1	-1	-1	-1	0.253172	-1	-1	-1	-1	0.526995	-1	-1	-1	-1	-1	-1	0.527467	-1	-1	-1	-1	-1	-1	-1	-1	-1	-1	-1	0.591555
ABalpaappa	-1	-1	-1	-1	0.702821	-1	-1	-1	-1	-1	-1	-1	-1	-1	-1	-1	-1	-1	-1	-1	-1	-1	-1	-1	-1	-1	-1	-1	-1	-1	-1	-1	-1	-1	-1	-1	0.517609	-1	-1	-1	-1	-1	-1	-1	-1	-1	-1	-1	0.581158
ABaraaappa	-1	-1	-1	-1	0.702821	-1	-1	-1	-1	-1	-1	-1	-1	-1	-1	-1	-1	-1	-1	-1	-1	-1	-1	-1	-1	-1	-1	-1	-1	-1	-1	-1	-1	-1	-1	-1	0.517609	-1	-1	-1	-1	-1	-1	-1	-1	-1	-1	-1	0.581158
ABalpaappp	-1	-1	0.746547	-1	0.639946	0.462513	-1	-1	-1	-1	-1	-1	-1	-1	-1	-1	-1	-1	-1	-1	-1	-1	0.580336	-1	-1	-1	-1	-1	-1	-1	-1	-1	-1	-1	-1	-1	0.4128	-1	-1	-1	-1	-1	-1	-1	-1	-1	-1	-1	0.556307
ABalpaapppa	-1	-1	-1	-1	0.734669	0.629233	-1	-1	0.423893	0.365209	0.818732	-1	-1	-1	-1	-1	-1	-1	-1	-1	-1	-1	-1	-1	-1	-1	-1	-1	-1	-1	-1	-1	-1	-1	-1	-1	-1	-1	-1	-1	-1	-1	0.525603	-1	-1	-1	-1	0.689003	-1
ABalpaapppp	-1	-1	-1	-1	0.734669	0.629233	-1	-1	0.423893	0.365209	0.818732	-1	-1	-1	-1	-1	-1	-1	-1	-1	-1	-1	-1	-1	-1	-1	-1	-1	-1	-1	-1	-1	-1	-1	-1	-1	-1	-1	-1	-1	-1	-1	0.525603	-1	-1	-1	-1	0.689003	-1
ABalpapaaap	-1	-1	-1	-1	0.734669	0.629233	-1	-1	0.423893	0.365209	0.818732	-1	-1	-1	-1	-1	-1	-1	-1	-1	-1	-1	-1	-1	-1	-1	-1	-1	-1	-1	-1	-1	-1	-1	-1	-1	-1	-1	-1	-1	-1	-1	0.525603	-1	-1	-1	-1	0.689003	-1
ABaraaapppp	-1	-1	-1	-1	0.734669	0.629233	-1	-1	0.423893	0.365209	0.818732	-1	-1	-1	-1	-1	-1	-1	-1	-1	-1	-1	-1	-1	-1	-1	-1	-1	-1	-1	-1	-1	-1	-1	-1	-1	-1	-1	-1	-1	-1	-1	0.525603	-1	-1	-1	-1	0.689003	-1
ABalpapa	-1	-1	0.717634	-1	0.605457	-1	-1	-1	-1	-1	-1	-1	-1	-1	-1	-1	-1	-1	-1	-1	-1	-1	-1	0.537283	-1	-1	0.591495	-1	-1	0	-1	-1	-1	-1	-1	-1	-1	-1	-1	-1	-1	-1	-1	-1	-1	-1	-1	-1	0.617579
ABarappa	-1	-1	0.717634	-1	0.605457	-1	-1	-1	-1	-1	-1	-1	-1	-1	-1	-1	-1	-1	-1	-1	-1	-1	-1	0.537283	-1	-1	0.591495	-1	-1	0	-1	-1	-1	-1	-1	-1	-1	-1	-1	-1	-1	-1	-1	-1	-1	-1	-1	-1	0.617579
ABalpapaa	-1	-1	0.760781	-1	-1	0.564411	-1	-1	-1	-1	-1	-1	-1	-1	-1	-1	-1	-1	-1	-1	-1	-1	-1	-1	0	-1	-1	-1	-1	0.524147	-1	-1	-1	-1	-1	-1	0.43021	-1	-1	-1	-1	-1	-1	-1	-1	-1	-1	-1	0.601931
ABarappaa	-1	-1	0.760781	-1	-1	0.564411	-1	-1	-1	-1	-1	-1	-1	-1	-1	-1	-1	-1	-1	-1	-1	-1	-1	-1	0	-1	-1	-1	-1	0.524147	-1	-1	-1	-1	-1	-1	0.43021	-1	-1	-1	-1	-1	-1	-1	-1	-1	-1	-1	0.601931
ABalpapaaa	-1	-1	0.782934	-1	-1	0.543218	0.457437	-1	-1	-1	-1	-1	-1	-1	-1	-1	-1	-1	-1	-1	-1	-1	0.662276	-1	0.274748	-1	-1	-1	-1	0.603284	-1	0.523849	-1	-1	-1	-1	0.411196	-1	-1	-1	-1	-1	-1	-1	-1	-1	-1	-1	0.585976
ABalpapaap	-1	-1	0.724578	-1	0.616873	0.466798	-1	-1	-1	-1	-1	-1	-1	-1	-1	-1	-1	-1	0.409365	-1	-1	-1	-1	-1	-1	-1	-1	-1	-1	-1	-1	-1	-1	-1	-1	-1	0.449761	-1	-1	-1	-1	-1	-1	-1	-1	-1	-1	-1	0.514745
ABarappaap	-1	-1	0.724578	-1	0.616873	0.466798	-1	-1	-1	-1	-1	-1	-1	-1	-1	-1	-1	-1	0.409365	-1	-1	-1	-1	-1	-1	-1	-1	-1	-1	-1	-1	-1	-1	-1	-1	-1	0.449761	-1	-1	-1	-1	-1	-1	-1	-1	-1	-1	-1	0.514745
ABalpapaapa	-1	-1	-1	-1	0.701535	0.547648	-1	-1	0.452653	-1	0.858836	-1	-1	0.578638	-1	-1	-1	-1	-1	-1	-1	-1	-1	-1	-1	-1	-1	-1	-1	-1	-1	-1	-1	-1	-1	-1	0.37314	-1	-1	-1	-1	-1	0.453376	-1	-1	-1	-1	-1	0.491834
ABarappaapa	-1	-1	-1	-1	0.701535	0.547648	-1	-1	0.452653	-1	0.858836	-1	-1	0.578638	-1	-1	-1	-1	-1	-1	-1	-1	-1	-1	-1	-1	-1	-1	-1	-1	-1	-1	-1	-1	-1	-1	0.37314	-1	-1	-1	-1	-1	0.453376	-1	-1	-1	-1	-1	0.491834
ABalpapap	-1	-1	0.781575	-1	0.567535	-1	-1	-1	-1	-1	-1	-1	-1	-1	-1	-1	-1	-1	-1	-1	-1	0.559252	0.665867	-1	-1	-1	-1	-1	-1	0.526549	-1	-1	-1	-1	-1	-1	0.440498	-1	-1	-1	-1	-1	-1	-1	-1	-1	-1	-1	0.608918
ABarappap	-1	-1	0.781575	-1	0.567535	-1	-1	-1	-1	-1	-1	-1	-1	-1	-1	-1	-1	-1	-1	-1	-1	0.559252	0.665867	-1	-1	-1	-1	-1	-1	0.526549	-1	-1	-1	-1	-1	-1	0.440498	-1	-1	-1	-1	-1	-1	-1	-1	-1	-1	-1	0.608918
ABalpapapa	-1	-1	0.843684	-1	-1	0.577245	-1	-1	-1	-1	-1	-1	-1	-1	-1	-1	-1	-1	-1	-1	-1	-1	-1	-1	-1	-1	-1	-1	-1	0.62263	-1	-1	-1	0.827916	-1	-1	0	-1	-1	-1	-1	-1	-1	-1	-1	-1	-1	-1	0.653986
ABarappapa	-1	-1	0.843684	-1	-1	0.577245	-1	-1	-1	-1	-1	-1	-1	-1	-1	-1	-1	-1	-1	-1	-1	-1	-1	-1	-1	-1	-1	-1	-1	0.62263	-1	-1	-1	0.827916	-1	-1	0	-1	-1	-1	-1	-1	-1	-1	-1	-1	-1	-1	0.653986
ABalpapapaa	0.619046	-1	-1	-1	-1	-1	-1	-1	0.613911	-1	-1	-1	-1	-1	-1	-1	-1	-1	-1	-1	-1	-1	-1	-1	-1	0.929868	-1	-1	0.982895	-1	-1	-1	-1	-1	-1	-1	-1	-1	-1	-1	-1	-1	-1	-1	-1	-1	0.780544	-1	0.627544
ABalppapaaa	0.619046	-1	-1	-1	-1	-1	-1	-1	0.613911	-1	-1	-1	-1	-1	-1	-1	-1	-1	-1	-1	-1	-1	-1	-1	-1	0.929868	-1	-1	0.982895	-1	-1	-1	-1	-1	-1	-1	-1	-1	-1	-1	-1	-1	-1	-1	-1	-1	0.780544	-1	0.627544
ABalpppapad	0.619046	-1	-1	-1	-1	-1	-1	-1	0.613911	-1	-1	-1	-1	-1	-1	-1	-1	-1	-1	-1	-1	-1	-1	-1	-1	0.929868	-1	-1	0.982895	-1	-1	-1	-1	-1	-1	-1	-1	-1	-1	-1	-1	-1	-1	-1	-1	-1	0.780544	-1	0.627544
ABarappapaa	0.619046	-1	-1	-1	-1	-1	-1	-1	0.613911	-1	-1	-1	-1	-1	-1	-1	-1	-1	-1	-1	-1	-1	-1	-1	-1	0.929868	-1	-1	0.982895	-1	-1	-1	-1	-1	-1	-1	-1	-1	-1	-1	-1	-1	-1	-1	-1	-1	0.780544	-1	0.627544
ABarapppaaa	0.619046	-1	-1	-1	-1	-1	-1	-1	0.613911	-1	-1	-1	-1	-1	-1	-1	-1	-1	-1	-1	-1	-1	-1	-1	-1	0.929868	-1	-1	0.982895	-1	-1	-1	-1	-1	-1	-1	-1	-1	-1	-1	-1	-1	-1	-1	-1	-1	0.780544	-1	0.627544
ABpraaaapad	0.619046	-1	-1	-1	-1	-1	-1	-1	0.613911	-1	-1	-1	-1	-1	-1	-1	-1	-1	-1	-1	-1	-1	-1	-1	-1	0.929868	-1	-1	0.982895	-1	-1	-1	-1	-1	-1	-1	-1	-1	-1	-1	-1	-1	-1	-1	-1	-1	0.780544	-1	0.627544
ABalpapapapp	0.706737	-1	0.653928	-1	-1	-1	-1	-1	-1	-1	-1	-1	-1	-1	-1	-1	-1	0.957619	-1	-1	-1	-1	0.622559	-1	-1	0.902311	-1	-1	-1	-1	0.513987	-1	-1	-1	-1	-1	0.573066	-1	-1	-1	-1	-1	-1	-1	-1	-1	-1	-1	0.681737
ABarappapapp	0.706737	-1	0.653928	-1	-1	-1	-1	-1	-1	-1	-1	-1	-1	-1	-1	-1	-1	0.957619	-1	-1	-1	-1	0.622559	-1	-1	0.902311	-1	-1	-1	-1	0.513987	-1	-1	-1	-1	-1	0.573066	-1	-1	-1	-1	-1	-1	-1	-1	-1	-1	-1	0.681737
ABalpapappp	0.706737	-1	0.653928	-1	-1	-1	-1	-1	-1	-1	-1	-1	-1	-1	-1	-1	-1	0.957619	-1	-1	-1	-1	0.622559	-1	-1	0.902311	-1	-1	-1	-1	0.513987	-1	-1	-1	-1	-1	0.573066	-1	-1	-1	-1	-1	-1	-1	-1	-1	-1	-1	0.681737
ABarappappp	0.706737	-1	0.653928	-1	-1	-1	-1	-1	-1	-1	-1	-1	-1	-1	-1	-1	-1	0.957619	-1	-1	-1	-1	0.622559	-1	-1	0.902311	-1	-1	-1	-1	0.513987	-1	-1	-1	-1	-1	0.573066	-1	-1	-1	-1	-1	-1	-1	-1	-1	-1	-1	0.681737
ABalpapapp	-1	-1	0.759914	-1	-1	0.582841	-1	-1	-1	-1	-1	-1	-1	-1	-1	-1	-1	-1	-1	-1	-1	0.580955	-1	-1	-1	-1	-1	-1	0.867492	0.628418	-1	-1	-1	-1	-1	-1	0.525292	-1	-1	-1	-1	-1	-1	-1	0.504386	-1	-1	-1	0.583501
ABarappapp	-1	-1	0.759914	-1	-1	0.582841	-1	-1	-1	-1	-1	-1	-1	-1	-1	-1	-1	-1	-1	-1	-1	0.580955	-1	-1	-1	-1	-1	-1	0.867492	0.628418	-1	-1	-1	-1	-1	-1	0.525292	-1	-1	-1	-1	-1	-1	-1	0.504386	-1	-1	-1	0.583501
ABalpapp	-1	-1	0.765295	-1	-1	-1	-1	-1	-1	-1	-1	-1	-1	-1	0.524305	-1	-1	-1	-1	-1	-1	0.571865	0.698375	-1	-1	-1	-1	-1	-1	0.460972	-1	-1	-1	-1	-1	-1	-1	-1	-1	-1	-1	-1	-1	-1	-1	-1	-1	-1	0.635685
ABarapap	-1	-1	0.765295	-1	-1	-1	-1	-1	-1	-1	-1	-1	-1	-1	0.524305	-1	-1	-1	-1	-1	-1	0.571865	0.698375	-1	-1	-1	-1	-1	-1	0.460972	-1	-1	-1	-1	-1	-1	-1	-1	-1	-1	-1	-1	-1	-1	-1	-1	-1	-1	0.635685
ABalpappa	0.542139	-1	-1	-1	-1	-1	-1	-1	-1	-1	-1	-1	-1	-1	-1	-1	-1	-1	-1	-1	-1	0.585908	0.657719	-1	-1	-1	-1	-1	-1	0.52589	-1	-1	-1	-1	-1	-1	0.459741	-1	-1	-1	-1	-1	-1	-1	-1	-1	-1	-1	0.586411
ABarapapa	0.542139	-1	-1	-1	-1	-1	-1	-1	-1	-1	-1	-1	-1	-1	-1	-1	-1	-1	-1	-1	-1	0.585908	0.657719	-1	-1	-1	-1	-1	-1	0.52589	-1	-1	-1	-1	-1	-1	0.459741	-1	-1	-1	-1	-1	-1	-1	-1	-1	-1	-1	0.586411
ABalpappaa	-1	-1	0.6635	-1	-1	0.529361	-1	-1	-1	-1	-1	-1	0	-1	-1	-1	-1	-1	-1	-1	0.590016	-1	-1	-1	0.25905	0.603352	-1	-1	-1	0.610618	-1	-1	-1	-1	-1	-1	0	-1	-1	-1	-1	-1	-1	-1	-1	-1	-1	0.644937	0.555617
ABarapapaa	-1	-1	0.6635	-1	-1	0.529361	-1	-1	-1	-1	-1	-1	0	-1	-1	-1	-1	-1	-1	-1	0.590016	-1	-1	-1	0.25905	0.603352	-1	-1	-1	0.610618	-1	-1	-1	-1	-1	-1	0	-1	-1	-1	-1	-1	-1	-1	-1	-1	-1	0.644937	0.555617
ABalpappap	-1	-1	0.735455	0.436289	-1	0.553839	-1	-1	0.636433	-1	-1	-1	-1	-1	-1	-1	-1	-1	-1	-1	-1	0.652919	-1	-1	-1	-1	-1	-1	-1	-1	-1	-1	-1	-1	-1	-1	0.443944	-1	-1	-1	-1	-1	-1	-1	-1	-1	-1	-1	0.57427
ABalpappp	-1	-1	-1	-1	0.696458	-1	-1	-1	0.644053	-1	-1	-1	-1	-1	-1	-1	-1	-1	-1	-1	-1	0.545071	-1	-1	-1	-1	-1	-1	-1	0.461849	-1	-1	-1	-1	-1	-1	0.471246	-1	-1	-1	-1	-1	-1	-1	-1	-1	-1	-1	0.654796
ABarapapp	-1	-1	-1	-1	0.696458	-1	-1	-1	0.644053	-1	-1	-1	-1	-1	-1	-1	-1	-1	-1	-1	-1	0.545071	-1	-1	-1	-1	-1	-1	-1	0.461849	-1	-1	-1	-1	-1	-1	0.471246	-1	-1	-1	-1	-1	-1	-1	-1	-1	-1	-1	0.654796
ABalpapppa	-1	-1	0.651992	-1	-1	-1	-1	-1	-1	-1	-1	-1	-1	-1	-1	-1	-1	-1	-1	-1	0	-1	-1	-1	0	-1	-1	-1	-1	-1	-1	0.617034	-1	-1	-1	-1	0	-1	-1	0.562262	-1	-1	-1	-1	-1	-1	-1	-1	0.493923
ABarapappa	-1	-1	0.651992	-1	-1	-1	-1	-1	-1	-1	-1	-1	-1	-1	-1	-1	-1	-1	-1	-1	0	-1	-1	-1	0	-1	-1	-1	-1	-1	-1	0.617034	-1	-1	-1	-1	0	-1	-1	0.562262	-1	-1	-1	-1	-1	-1	-1	-1	0.493923
ABalpapppp	-1	-1	0.832095	0.520371	0.773964	0.696431	-1	-1	-1	-1	-1	-1	-1	-1	-1	-1	-1	-1	-1	-1	-1	0.707861	-1	-1	-1	-1	-1	-1	-1	0.71767	-1	-1	-1	-1	-1	-1	0	-1	-1	-1	-1	-1	-1	-1	-1	-1	-1	-1	0.672366
ABarapappp	-1	-1	0.832095	0.520371	0.773964	0.696431	-1	-1	-1	-1	-1	-1	-1	-1	-1	-1	-1	-1	-1	-1	-1	0.707861	-1	-1	-1	-1	-1	-1	-1	0.71767	-1	-1	-1	-1	-1	-1	0	-1	-1	-1	-1	-1	-1	-1	-1	-1	-1	-1	0.672366
ABalpaa	-1	-1	0.787779	-1	0.617956	0.626567	-1	-1	-1	-1	-1	-1	-1	-1	-1	-1	-1	-1	-1	-1	-1	-1	0.712865	-1	0.434274	-1	-1	-1	-1	0	-1	-1	-1	-1	-1	-1	0.537271	-1	-1	-1	-1	-1	-1	-1	-1	-1	-1	-1	0.675942
ABalpap	-1	-1	0.787779	-1	0.617956	0.626567	-1	-1	-1	-1	-1	-1	-1	-1	-1	-1	-1	-1	-1	-1	-1	-1	0.712865	-1	0.434274	-1	-1	-1	-1	0	-1	-1	-1	-1	-1	-1	0.537271	-1	-1	-1	-1	-1	-1	-1	-1	-1	-1	-1	0.675942
ABaraaa	-1	-1	0.781711	-1	-1	0.7736	-1	-1	-1	-1	-1	-1	-1	-1	-1	-1	-1	-1	-1	-1	-1	-1	0.720343	-1	0.400424	-1	-1	-1	-1	0	-1	-1	-1	-1	-1	-1	0.429665	-1	-1	-1	-1	-1	-1	-1	-1	-1	-1	-1	0.642892
ABaraap	-1	-1	0.781711	-1	-1	0.7736	-1	-1	-1	-1	-1	-1	-1	-1	-1	-1	-1	-1	-1	-1	-1	-1	0.720343	-1	0.400424	-1	-1	-1	-1	0	-1	-1	-1	-1	-1	-1	0.429665	-1	-1	-1	-1	-1	-1	-1	-1	-1	-1	-1	0.642892
ABalppa	-1	-1	0.753402	-1	0.578692	-1	-1	-1	-1	-1	-1	-1	-1	-1	-1	-1	-1	-1	-1	-1	-1	-1	0.719893	0.702633	-1	-1	-1	-1	-1	0	-1	-1	-1	0.767384	-1	-1	-1	-1	-1	-1	-1	-1	-1	-1	-1	-1	-1	-1	0.629992
ABalppaa	-1	-1	0.708195	-1	-1	0.56541	-1	-1	-1	-1	-1	-1	-1	-1	-1	-1	-1	-1	-1	-1	-1	-1	-1	0.71422	-1	-1	-1	-1	-1	0	-1	-1	-1	-1	-1	-1	0	-1	-1	-1	-1	-1	-1	-1	-1	-1	-1	-1	0.585018
ABalppap	-1	-1	0.75929	-1	0.581118	-1	-1	-1	0.522962	-1	-1	-1	-1	-1	-1	-1	-1	-1	-1	-1	-1	-1	0.712087	0.687708	-1	-1	-1	-1	-1	0	-1	-1	-1	0.788841	-1	-1	-1	-1	-1	-1	-1	-1	-1	-1	-1	-1	-1	-1	0.650268
ABarappp	-1	-1	0.75929	-1	0.581118	-1	-1	-1	0.522962	-1	-1	-1	-1	-1	-1	-1	-1	-1	-1	-1	-1	-1	0.712087	0.687708	-1	-1	-1	-1	-1	0	-1	-1	-1	0.788841	-1	-1	-1	-1	-1	-1	-1	-1	-1	-1	-1	-1	-1	-1	0.650268
ABalppapa	-1	-1	0.79108	-1	-1	0.639465	-1	-1	-1	-1	-1	-1	-1	-1	-1	-1	-1	-1	-1	-1	-1	-1	0.719467	0.624656	-1	-1	-1	-1	-1	0.200649	-1	-1	-1	-1	-1	-1	0.36667	-1	-1	-1	-1	0	-1	-1	-1	-1	-1	-1	0.594627
ABarapppa	-1	-1	0.79108	-1	-1	0.639465	-1	-1	-1	-1	-1	-1	-1	-1	-1	-1	-1	-1	-1	-1	-1	-1	0.719467	0.624656	-1	-1	-1	-1	-1	0.200649	-1	-1	-1	-1	-1	-1	0.36667	-1	-1	-1	-1	0	-1	-1	-1	-1	-1	-1	0.594627
ABalppapaa	0.618104	-1	0.797581	-1	0.644536	0.577823	-1	-1	-1	-1	-1	-1	-1	-1	-1	-1	-1	-1	-1	-1	-1	-1	-1	0.68357	-1	-1	-1	-1	-1	0	-1	-1	-1	0.749117	-1	-1	0	-1	-1	-1	-1	0	-1	-1	-1	-1	-1	-1	0.544512
ABarapppaa	0.618104	-1	0.797581	-1	0.644536	0.577823	-1	-1	-1	-1	-1	-1	-1	-1	-1	-1	-1	-1	-1	-1	-1	-1	-1	0.68357	-1	-1	-1	-1	-1	0	-1	-1	-1	0.749117	-1	-1	0	-1	-1	-1	-1	0	-1	-1	-1	-1	-1	-1	0.544512
ABalppapap	-1	-1	0.833314	-1	0.673364	0.492617	-1	-1	-1	-1	-1	-1	-1	-1	-1	-1	-1	-1	0.380942	-1	-1	-1	-1	0.69824	-1	-1	-1	-1	-1	-1	-1	-1	-1	-1	-1	-1	0.451654	-1	-1	-1	-1	0.332261	-1	-1	-1	-1	-1	-1	0.483974
ABarapppap	-1	-1	0.833314	-1	0.673364	0.492617	-1	-1	-1	-1	-1	-1	-1	-1	-1	-1	-1	-1	0.380942	-1	-1	-1	-1	0.69824	-1	-1	-1	-1	-1	-1	-1	-1	-1	-1	-1	-1	0.451654	-1	-1	-1	-1	0.332261	-1	-1	-1	-1	-1	-1	0.483974
ABalppapp	-1	-1	0.787454	-1	-1	-1	-1	-1	0.489335	-1	-1	-1	-1	-1	-1	-1	-1	-1	-1	-1	-1	-1	0.69516	0.691017	-1	-1	-1	-1	-1	0.496214	-1	-1	-1	-1	-1	-1	0.534552	-1	-1	-1	-1	-1	-1	-1	-1	-1	-1	-1	0.619828
ABarapppp	-1	-1	0.787454	-1	-1	-1	-1	-1	0.489335	-1	-1	-1	-1	-1	-1	-1	-1	-1	-1	-1	-1	-1	0.69516	0.691017	-1	-1	-1	-1	-1	0.496214	-1	-1	-1	-1	-1	-1	0.534552	-1	-1	-1	-1	-1	-1	-1	-1	-1	-1	-1	0.619828
ABalppappa	-1	-1	0.760437	-1	-1	0.583046	-1	-1	-1	-1	-1	-1	-1	-1	-1	-1	-1	-1	-1	-1	-1	-1	-1	0.625117	-1	0.652094	-1	-1	-1	0.346123	-1	0	-1	-1	-1	-1	-1	-1	-1	-1	-1	-1	-1	-1	-1	-1	-1	-1	0.643075
ABarappppa	-1	-1	0.760437	-1	-1	0.583046	-1	-1	-1	-1	-1	-1	-1	-1	-1	-1	-1	-1	-1	-1	-1	-1	-1	0.625117	-1	0.652094	-1	-1	-1	0.346123	-1	0	-1	-1	-1	-1	-1	-1	-1	-1	-1	-1	-1	-1	-1	-1	-1	-1	0.643075
ABalppappaa	-1	-1	0.696206	-1	-1	0.787335	-1	-1	0.59014	-1	-1	-1	-1	-1	-1	-1	-1	-1	0.721805	0.949499	-1	-1	0.626055	-1	-1	0.960155	-1	-1	-1	-1	-1	-1	-1	-1	-1	-1	0.635992	-1	-1	-1	-1	-1	-1	-1	-1	-1	0.759806	-1	0.665515
ABarappppaa	-1	-1	0.696206	-1	-1	0.787335	-1	-1	0.59014	-1	-1	-1	-1	-1	-1	-1	-1	-1	0.721805	0.949499	-1	-1	0.626055	-1	-1	0.960155	-1	-1	-1	-1	-1	-1	-1	-1	-1	-1	0.635992	-1	-1	-1	-1	-1	-1	-1	-1	-1	0.759806	-1	0.665515
ABplpapaaaa	-1	-1	0.696206	-1	-1	0.787335	-1	-1	0.59014	-1	-1	-1	-1	-1	-1	-1	-1	-1	0.721805	0.949499	-1	-1	0.626055	-1	-1	0.960155	-1	-1	-1	-1	-1	-1	-1	-1	-1	-1	0.635992	-1	-1	-1	-1	-1	-1	-1	-1	-1	0.759806	-1	0.665515
ABprpapaaaa	-1	-1	0.696206	-1	-1	0.787335	-1	-1	0.59014	-1	-1	-1	-1	-1	-1	-1	-1	-1	0.721805	0.949499	-1	-1	0.626055	-1	-1	0.960155	-1	-1	-1	-1	-1	-1	-1	-1	-1	-1	0.635992	-1	-1	-1	-1	-1	-1	-1	-1	-1	0.759806	-1	0.665515
ABalppappap	-1	-1	0.973254	-1	-1	0.897398	-1	-1	0.523551	-1	-1	-1	-1	-1	0.928235	-1	-1	-1	-1	-1	-1	-1	-1	-1	-1	1	-1	-1	-1	-1	-1	-1	-1	-1	-1	-1	0.672655	-1	-1	-1	-1	-1	-1	-1	-1	-1	-1	-1	0.809377
ABarappppap	-1	-1	0.973254	-1	-1	0.897398	-1	-1	0.523551	-1	-1	-1	-1	-1	0.928235	-1	-1	-1	-1	-1	-1	-1	-1	-1	-1	1	-1	-1	-1	-1	-1	-1	-1	-1	-1	-1	0.672655	-1	-1	-1	-1	-1	-1	-1	-1	-1	-1	-1	0.809377
ABalppp	-1	-1	0.752476	-1	-1	0.642136	-1	-1	0.407358	-1	-1	-1	-1	-1	-1	-1	-1	-1	-1	-1	-1	-1	0.720745	0.731882	-1	-1	-1	-1	-1	0	-1	-1	-1	-1	-1	-1	0.523052	-1	0.721555	-1	-1	-1	-1	-1	-1	-1	-1	-1	0.640313
ABpraaa	-1	-1	0.752476	-1	-1	0.642136	-1	-1	0.407358	-1	-1	-1	-1	-1	-1	-1	-1	-1	-1	-1	-1	-1	0.720745	0.731882	-1	-1	-1	-1	-1	0	-1	-1	-1	-1	-1	-1	0.523052	-1	0.721555	-1	-1	-1	-1	-1	-1	-1	-1	-1	0.640313
ABalpppa	-1	-1	0.732478	-1	-1	0.610668	0.241879	-1	-1	-1	-1	-1	-1	-1	-1	-1	-1	-1	-1	-1	-1	-1	0.678002	0.689368	-1	-1	-1	-1	-1	0	-1	-1	-1	-1	-1	-1	0.473299	-1	-1	-1	-1	-1	-1	-1	-1	-1	-1	-1	0.575692
ABpraaaa	-1	-1	0.732478	-1	-1	0.610668	0.241879	-1	-1	-1	-1	-1	-1	-1	-1	-1	-1	-1	-1	-1	-1	-1	0.678002	0.689368	-1	-1	-1	-1	-1	0	-1	-1	-1	-1	-1	-1	0.473299	-1	-1	-1	-1	-1	-1	-1	-1	-1	-1	-1	0.575692
ABalpppaa	-1	-1	0.806518	-1	-1	0.616218	-1	-1	-1	-1	-1	-1	-1	-1	-1	-1	-1	-1	-1	-1	-1	-1	-1	0.59213	-1	-1	-1	-1	-1	0.469316	-1	-1	-1	-1	-1	-1	0.473002	-1	-1	-1	-1	0	-1	-1	-1	-1	-1	-1	0.623811
ABpraaaaa	-1	-1	0.806518	-1	-1	0.616218	-1	-1	-1	-1	-1	-1	-1	-1	-1	-1	-1	-1	-1	-1	-1	-1	-1	0.59213	-1	-1	-1	-1	-1	0.469316	-1	-1	-1	-1	-1	-1	0.473002	-1	-1	-1	-1	0	-1	-1	-1	-1	-1	-1	0.623811
ABalpppaaa	-1	-1	-1	-1	-1	0.509585	-1	-1	-1	-1	-1	-1	-1	-1	-1	-1	-1	-1	0.377018	0.674624	-1	-1	-1	0.701357	-1	-1	-1	-1	-1	-1	-1	-1	-1	-1	-1	-1	-1	-1	-1	-1	-1	-1	-1	-1	-1	-1	-1	-1	0.53068
ABpraaaaaa	-1	-1	-1	-1	-1	0.509585	-1	-1	-1	-1	-1	-1	-1	-1	-1	-1	-1	-1	0.377018	0.674624	-1	-1	-1	0.701357	-1	-1	-1	-1	-1	-1	-1	-1	-1	-1	-1	-1	-1	-1	-1	-1	-1	-1	-1	-1	-1	-1	-1	-1	0.53068
ABalpppaaaa	-1	-1	0.732442	-1	-1	0.795064	-1	-1	-1	-1	-1	-1	-1	-1	-1	-1	-1	-1	-1	-1	-1	-1	-1	-1	-1	0.888669	-1	-1	-1	-1	-1	-1	-1	-1	-1	-1	0.613941	-1	-1	0	-1	-1	-1	-1	-1	0.734386	-1	-1	0.66343
ABpraaaaaaa	-1	-1	0.732442	-1	-1	0.795064	-1	-1	-1	-1	-1	-1	-1	-1	-1	-1	-1	-1	-1	-1	-1	-1	-1	-1	-1	0.888669	-1	-1	-1	-1	-1	-1	-1	-1	-1	-1	0.613941	-1	-1	0	-1	-1	-1	-1	-1	0.734386	-1	-1	0.66343
ABalpppaap	-1	-1	0.83841	-1	-1	0.529981	-1	-1	-1	-1	-1	-1	-1	-1	-1	-1	-1	-1	-1	-1	-1	-1	-1	0.699149	-1	-1	-1	-1	-1	-1	-1	-1	-1	-1	-1	-1	0.500448	-1	-1	-1	-1	-1	-1	-1	-1	-1	-1	-1	0.576064
ABpraaaaap	-1	-1	0.83841	-1	-1	0.529981	-1	-1	-1	-1	-1	-1	-1	-1	-1	-1	-1	-1	-1	-1	-1	-1	-1	0.699149	-1	-1	-1	-1	-1	-1	-1	-1	-1	-1	-1	-1	0.500448	-1	-1	-1	-1	-1	-1	-1	-1	-1	-1	-1	0.576064
ABalpppap	-1	-1	0.778991	-1	0.628776	0.63286	-1	-1	-1	-1	-1	-1	-1	-1	-1	-1	-1	-1	-1	-1	-1	0.722117	0.697652	0.618676	-1	-1	-1	-1	-1	0.583247	-1	-1	-1	-1	-1	-1	0.45896	-1	-1	-1	-1	-1	-1	-1	-1	-1	-1	-1	0.639003
ABpraaaap	-1	-1	0.778991	-1	0.628776	0.63286	-1	-1	-1	-1	-1	-1	-1	-1	-1	-1	-1	-1	-1	-1	-1	0.722117	0.697652	0.618676	-1	-1	-1	-1	-1	0.583247	-1	-1	-1	-1	-1	-1	0.45896	-1	-1	-1	-1	-1	-1	-1	-1	-1	-1	-1	0.639003
ABalpppapa	-1	-1	0.781508	-1	-1	0.602055	-1	-1	-1	-1	-1	-1	-1	-1	-1	-1	-1	-1	-1	-1	-1	-1	0.658328	0.588957	-1	0.582004	-1	-1	-1	0.620304	-1	-1	-1	-1	-1	-1	0.489901	-1	-1	-1	-1	-1	-1	-1	-1	-1	-1	-1	0.634842
ABpraaaapa	-1	-1	0.781508	-1	-1	0.602055	-1	-1	-1	-1	-1	-1	-1	-1	-1	-1	-1	-1	-1	-1	-1	-1	0.658328	0.588957	-1	0.582004	-1	-1	-1	0.620304	-1	-1	-1	-1	-1	-1	0.489901	-1	-1	-1	-1	-1	-1	-1	-1	-1	-1	-1	0.634842
ABalpppapav	-1	-1	0.7053	-1	-1	0.862455	-1	-1	-1	-1	-1	-1	0.90084	-1	-1	-1	-1	-1	-1	-1	-1	-1	0.776638	-1	-1	0.906835	-1	-1	-1	-1	-1	-1	-1	-1	-1	-1	0.824431	-1	-1	0.693572	-1	-1	-1	-1	-1	-1	-1	-1	0.803493
ABpraaaapav	-1	-1	0.7053	-1	-1	0.862455	-1	-1	-1	-1	-1	-1	0.90084	-1	-1	-1	-1	-1	-1	-1	-1	-1	0.776638	-1	-1	0.906835	-1	-1	-1	-1	-1	-1	-1	-1	-1	-1	0.824431	-1	-1	0.693572	-1	-1	-1	-1	-1	-1	-1	-1	0.803493
ABalpppapp	-1	-1	0.76971	-1	-1	0.503722	-1	-1	-1	-1	-1	-1	-1	-1	-1	-1	-1	-1	-1	-1	-1	0.725018	-1	-1	-1	-1	-1	-1	-1	0.590613	-1	-1	-1	-1	-1	-1	0	-1	-1	-1	-1	-1	-1	-1	-1	-1	-1	-1	0.658782
ABpraaaapp	-1	-1	0.76971	-1	-1	0.503722	-1	-1	-1	-1	-1	-1	-1	-1	-1	-1	-1	-1	-1	-1	-1	0.725018	-1	-1	-1	-1	-1	-1	-1	0.590613	-1	-1	-1	-1	-1	-1	0	-1	-1	-1	-1	-1	-1	-1	-1	-1	-1	-1	0.658782
ABalpppappp	0.57132	-1	0.608264	-1	-1	0.632326	-1	-1	-1	-1	-1	-1	-1	-1	-1	-1	-1	-1	0.371079	-1	-1	-1	0.648101	-1	-1	0.601835	-1	-1	-1	-1	-1	-1	-1	-1	-1	-1	0.29152	-1	-1	-1	-1	-1	-1	-1	-1	-1	-1	-1	0.562641
ABpraaaappp	0.57132	-1	0.608264	-1	-1	0.632326	-1	-1	-1	-1	-1	-1	-1	-1	-1	-1	-1	-1	0.371079	-1	-1	-1	0.648101	-1	-1	0.601835	-1	-1	-1	-1	-1	-1	-1	-1	-1	-1	0.29152	-1	-1	-1	-1	-1	-1	-1	-1	-1	-1	-1	0.562641
ABalpppapppa	-1	-1	-1	-1	-1	0.896576	0.529455	-1	0.543998	-1	0.693515	-1	-1	0.615884	-1	-1	-1	-1	-1	-1	-1	-1	-1	-1	-1	1	-1	-1	-1	-1	-1	-1	-1	-1	-1	-1	0.636235	-1	-1	-1	-1	0.433265	-1	-1	-1	-1	-1	-1	0.881936
ABpraaaapppa	-1	-1	-1	-1	-1	0.896576	0.529455	-1	0.543998	-1	0.693515	-1	-1	0.615884	-1	-1	-1	-1	-1	-1	-1	-1	-1	-1	-1	1	-1	-1	-1	-1	-1	-1	-1	-1	-1	-1	0.636235	-1	-1	-1	-1	0.433265	-1	-1	-1	-1	-1	-1	0.881936
ABalpppp	0.646598	-1	-1	-1	-1	-1	-1	-1	-1	-1	-1	-1	-1	-1	-1	-1	-1	-1	-1	-1	-1	-1	-1	0.594002	-1	-1	-1	-1	-1	0.498977	-1	-1	-1	-1	-1	-1	-1	-1	-1	-1	-1	-1	-1	-1	-1	-1	-1	-1	0.612984
ABpraaap	0.646598	-1	-1	-1	-1	-1	-1	-1	-1	-1	-1	-1	-1	-1	-1	-1	-1	-1	-1	-1	-1	-1	-1	0.594002	-1	-1	-1	-1	-1	0.498977	-1	-1	-1	-1	-1	-1	-1	-1	-1	-1	-1	-1	-1	-1	-1	-1	-1	-1	0.612984
ABalppppa	-1	-1	0.758701	-1	-1	-1	-1	-1	-1	-1	-1	-1	-1	-1	-1	-1	-1	-1	-1	-1	-1	-1	0.669004	0.62202	-1	-1	-1	-1	-1	0.589087	-1	-1	-1	-1	-1	-1	-1	-1	-1	-1	-1	-1	-1	-1	-1	-1	-1	-1	0.62861
ABpraaapa	-1	-1	0.758701	-1	-1	-1	-1	-1	-1	-1	-1	-1	-1	-1	-1	-1	-1	-1	-1	-1	-1	-1	0.669004	0.62202	-1	-1	-1	-1	-1	0.589087	-1	-1	-1	-1	-1	-1	-1	-1	-1	-1	-1	-1	-1	-1	-1	-1	-1	-1	0.62861
ABalppppaa	-1	-1	0.757372	-1	-1	0.564321	-1	-1	-1	-1	-1	-1	-1	-1	-1	-1	-1	-1	-1	-1	-1	-1	0.681688	0.646074	-1	-1	-1	-1	-1	0.661973	-1	0.532926	-1	-1	-1	-1	0.427775	-1	-1	-1	-1	-1	-1	-1	-1	-1	-1	-1	0.639734
ABpraaapaa	-1	-1	0.757372	-1	-1	0.564321	-1	-1	-1	-1	-1	-1	-1	-1	-1	-1	-1	-1	-1	-1	-1	-1	0.681688	0.646074	-1	-1	-1	-1	-1	0.661973	-1	0.532926	-1	-1	-1	-1	0.427775	-1	-1	-1	-1	-1	-1	-1	-1	-1	-1	-1	0.639734
ABalppppaad	-1	-1	0.722974	-1	-1	0.764308	0.419803	-1	-1	-1	-1	-1	-1	-1	-1	-1	-1	-1	-1	-1	-1	-1	-1	-1	-1	0.848474	-1	-1	-1	-1	-1	-1	-1	-1	0.529149	-1	0.540153	-1	-1	-1	-1	-1	-1	-1	-1	-1	-1	-1	0.741615
ABpraaapaad	-1	-1	0.722974	-1	-1	0.764308	0.419803	-1	-1	-1	-1	-1	-1	-1	-1	-1	-1	-1	-1	-1	-1	-1	-1	-1	-1	0.848474	-1	-1	-1	-1	-1	-1	-1	-1	0.529149	-1	0.540153	-1	-1	-1	-1	-1	-1	-1	-1	-1	-1	-1	0.741615
ABalppppap	-1	-1	0.741124	-1	-1	0.480612	-1	-1	-1	-1	-1	-1	-1	-1	-1	-1	-1	-1	-1	-1	-1	-1	-1	-1	-1	-1	-1	-1	-1	0.599147	-1	-1	-1	-1	-1	-1	-1	-1	-1	-1	-1	0	-1	-1	-1	-1	-1	-1	0.618586
ABpraaapap	-1	-1	0.741124	-1	-1	0.480612	-1	-1	-1	-1	-1	-1	-1	-1	-1	-1	-1	-1	-1	-1	-1	-1	-1	-1	-1	-1	-1	-1	-1	0.599147	-1	-1	-1	-1	-1	-1	-1	-1	-1	-1	-1	0	-1	-1	-1	-1	-1	-1	0.618586
ABalppppapa	-1	-1	0.678707	-1	-1	0.711362	-1	-1	-1	-1	-1	-1	-1	-1	-1	-1	-1	-1	-1	0.688078	-1	-1	-1	-1	-1	0.7402	-1	-1	-1	0.633806	-1	-1	-1	-1	-1	-1	0.600443	-1	-1	-1	-1	-1	-1	-1	-1	-1	-1	-1	0.61096
ABpraaapapa	-1	-1	0.678707	-1	-1	0.711362	-1	-1	-1	-1	-1	-1	-1	-1	-1	-1	-1	-1	-1	0.688078	-1	-1	-1	-1	-1	0.7402	-1	-1	-1	0.633806	-1	-1	-1	-1	-1	-1	0.600443	-1	-1	-1	-1	-1	-1	-1	-1	-1	-1	-1	0.61096
ABalppppapaa	0.512298	-1	-1	-1	-1	0.91047	-1	-1	-1	-1	0.479599	-1	-1	-1	0.942974	-1	-1	-1	-1	-1	-1	-1	0.664558	0.850591	-1	1	-1	-1	-1	-1	-1	-1	-1	-1	-1	-1	-1	-1	-1	-1	-1	-1	0.500459	-1	-1	-1	-1	-1	0.851033
ABpraaapapaa	0.512298	-1	-1	-1	-1	0.91047	-1	-1	-1	-1	0.479599	-1	-1	-1	0.942974	-1	-1	-1	-1	-1	-1	-1	0.664558	0.850591	-1	1	-1	-1	-1	-1	-1	-1	-1	-1	-1	-1	-1	-1	-1	-1	-1	-1	0.500459	-1	-1	-1	-1	-1	0.851033
ABalppppp	-1	-1	0.788829	-1	-1	0.704341	-1	-1	-1	-1	-1	-1	-1	-1	-1	-1	-1	-1	-1	-1	-1	-1	0.723417	0.675914	-1	-1	-1	-1	-1	0.647068	-1	-1	-1	-1	-1	-1	0	-1	-1	-1	-1	-1	-1	-1	-1	-1	-1	-1	0.664943
ABpraaapp	-1	-1	0.788829	-1	-1	0.704341	-1	-1	-1	-1	-1	-1	-1	-1	-1	-1	-1	-1	-1	-1	-1	-1	0.723417	0.675914	-1	-1	-1	-1	-1	0.647068	-1	-1	-1	-1	-1	-1	0	-1	-1	-1	-1	-1	-1	-1	-1	-1	-1	-1	0.664943
ABalpppppa	-1	-1	0.667279	-1	-1	0.60646	-1	-1	-1	-1	-1	-1	-1	-1	-1	-1	-1	-1	-1	-1	-1	-1	0.677709	0.60422	-1	0.583722	-1	-1	-1	0.692678	-1	0.632694	-1	-1	-1	-1	0.443349	-1	-1	-1	-1	-1	-1	-1	-1	-1	-1	-1	0.614073
ABpraaappa	-1	-1	0.667279	-1	-1	0.60646	-1	-1	-1	-1	-1	-1	-1	-1	-1	-1	-1	-1	-1	-1	-1	-1	0.677709	0.60422	-1	0.583722	-1	-1	-1	0.692678	-1	0.632694	-1	-1	-1	-1	0.443349	-1	-1	-1	-1	-1	-1	-1	-1	-1	-1	-1	0.614073
ABalpppppaa	0.666541	-1	0.894131	-1	-1	0.955954	-1	-1	0.522089	-1	-1	-1	-1	-1	0.833609	-1	-1	-1	-1	-1	-1	-1	-1	-1	-1	1	-1	-1	-1	-1	-1	-1	-1	-1	0.708468	-1	0.705963	-1	-1	-1	-1	-1	-1	-1	-1	-1	-1	-1	-1
ABpraaappaa	0.666541	-1	0.894131	-1	-1	0.955954	-1	-1	0.522089	-1	-1	-1	-1	-1	0.833609	-1	-1	-1	-1	-1	-1	-1	-1	-1	-1	1	-1	-1	-1	-1	-1	-1	-1	-1	0.708468	-1	0.705963	-1	-1	-1	-1	-1	-1	-1	-1	-1	-1	-1	-1
ABalpppppap	-1	-1	-1	-1	-1	0.883722	-1	-1	-1	-1	-1	-1	-1	0.570266	-1	-1	-1	-1	0.472621	-1	-1	-1	-1	-1	-1	0.986899	-1	-1	-1	-1	-1	-1	-1	-1	0.870227	-1	0.723951	-1	-1	-1	-1	-1	-1	-1	-1	-1	-1	-1	0.834666
ABpraaappap	-1	-1	-1	-1	-1	0.883722	-1	-1	-1	-1	-1	-1	-1	0.570266	-1	-1	-1	-1	0.472621	-1	-1	-1	-1	-1	-1	0.986899	-1	-1	-1	-1	-1	-1	-1	-1	0.870227	-1	0.723951	-1	-1	-1	-1	-1	-1	-1	-1	-1	-1	-1	0.834666
ABalpppppp	-1	-1	0.732444	-1	-1	0.694654	-1	-1	-1	-1	-1	-1	-1	-1	-1	-1	-1	-1	-1	-1	-1	0.758896	0.69697	0.659218	0.57198	-1	-1	-1	-1	0.717852	-1	-1	-1	-1	-1	-1	0.239245	-1	-1	-1	-1	-1	-1	-1	-1	-1	-1	-1	0.668232
ABpraaappp	-1	-1	0.732444	-1	-1	0.694654	-1	-1	-1	-1	-1	-1	-1	-1	-1	-1	-1	-1	-1	-1	-1	0.758896	0.69697	0.659218	0.57198	-1	-1	-1	-1	0.717852	-1	-1	-1	-1	-1	-1	0.239245	-1	-1	-1	-1	-1	-1	-1	-1	-1	-1	-1	0.668232
ABalppppppa	-1	-1	0.590784	-1	-1	0.611982	-1	-1	-1	-1	-1	-1	-1	-1	-1	-1	-1	-1	-1	-1	-1	0.753172	-1	-1	-1	0.673717	-1	-1	-1	0.581134	-1	-1	0.496452	-1	-1	-1	0.459458	-1	-1	-1	-1	-1	-1	-1	-1	-1	-1	-1	0.612365
ABpraaapppa	-1	-1	0.590784	-1	-1	0.611982	-1	-1	-1	-1	-1	-1	-1	-1	-1	-1	-1	-1	-1	-1	-1	0.753172	-1	-1	-1	0.673717	-1	-1	-1	0.581134	-1	-1	0.496452	-1	-1	-1	0.459458	-1	-1	-1	-1	-1	-1	-1	-1	-1	-1	-1	0.612365
ABalppppppaa	0.622174	-1	0.718289	-1	-1	0.919029	-1	-1	-1	-1	-1	-1	-1	-1	-1	-1	-1	-1	-1	-1	-1	0.823177	-1	-1	-1	1	-1	-1	-1	-1	-1	-1	0.642196	-1	0.596883	-1	0.685328	-1	-1	-1	-1	-1	-1	-1	-1	-1	-1	-1	0.85697
ABpraaapppaa	0.622174	-1	0.718289	-1	-1	0.919029	-1	-1	-1	-1	-1	-1	-1	-1	-1	-1	-1	-1	-1	-1	-1	0.823177	-1	-1	-1	1	-1	-1	-1	-1	-1	-1	0.642196	-1	0.596883	-1	0.685328	-1	-1	-1	-1	-1	-1	-1	-1	-1	-1	-1	0.85697
ABalppppppp	-1	-1	0.580576	-1	-1	0.643109	-1	-1	-1	-1	-1	-1	-1	-1	-1	-1	-1	-1	-1	-1	-1	-1	-1	0.722107	0.457995	0.662227	-1	-1	-1	0.717334	-1	-1	-1	0.794252	-1	-1	-1	-1	-1	-1	-1	-1	-1	-1	-1	-1	-1	-1	0.635929
ABpraaapppp	-1	-1	0.580576	-1	-1	0.643109	-1	-1	-1	-1	-1	-1	-1	-1	-1	-1	-1	-1	-1	-1	-1	-1	-1	0.722107	0.457995	0.662227	-1	-1	-1	0.717334	-1	-1	-1	0.794252	-1	-1	-1	-1	-1	-1	-1	-1	-1	-1	-1	-1	-1	-1	0.635929
ABalpppppppa	-1	-1	0.905851	-1	-1	0.915203	0.450021	-1	-1	-1	-1	-1	-1	-1	-1	-1	-1	-1	-1	-1	-1	-1	-1	0.872326	-1	1	-1	-1	-1	-1	-1	-1	-1	0.867222	0.57533	-1	0.619782	-1	-1	-1	-1	0.447746	-1	-1	-1	-1	-1	-1	0.921435
ABpraaappppa	-1	-1	0.905851	-1	-1	0.915203	0.450021	-1	-1	-1	-1	-1	-1	-1	-1	-1	-1	-1	-1	-1	-1	-1	-1	0.872326	-1	1	-1	-1	-1	-1	-1	-1	-1	0.867222	0.57533	-1	0.619782	-1	-1	-1	-1	0.447746	-1	-1	-1	-1	-1	-1	0.921435
ABalpppppppp	-1	-1	0.667777	-1	-1	0.812234	-1	-1	0.548945	-1	-1	-1	-1	-1	-1	-1	-1	-1	-1	-1	-1	-1	-1	0.84145	-1	0.857707	-1	-1	1	-1	-1	-1	-1	0.827312	-1	-1	0.44319	-1	-1	-1	-1	-1	0.695942	-1	-1	-1	-1	-1	0.721191
ABpraaappppp	-1	-1	0.667777	-1	-1	0.812234	-1	-1	0.548945	-1	-1	-1	-1	-1	-1	-1	-1	-1	-1	-1	-1	-1	-1	0.84145	-1	0.857707	-1	-1	1	-1	-1	-1	-1	0.827312	-1	-1	0.44319	-1	-1	-1	-1	-1	0.695942	-1	-1	-1	-1	-1	0.721191
ABaraaaa	0.604707	-1	0.751978	-1	-1	0.585161	-1	-1	-1	-1	-1	-1	-1	-1	-1	-1	-1	-1	-1	-1	-1	-1	-1	-1	0.451317	-1	-1	-1	-1	0.477547	-1	-1	-1	-1	-1	-1	0.507069	-1	-1	-1	-1	-1	-1	-1	-1	-1	-1	-1	0.591974
ABaraaaaa	-1	-1	0.807434	-1	-1	-1	-1	-1	-1	-1	0.445518	-1	-1	-1	-1	-1	-1	-1	-1	-1	0.511302	-1	-1	-1	-1	-1	-1	-1	-1	0.590379	-1	-1	-1	-1	-1	-1	-1	-1	-1	-1	-1	-1	-1	-1	-1	-1	-1	-1	0.600313
ABaraaaaaa	-1	-1	0.824895	0.477593	-1	0.537915	-1	-1	-1	-1	-1	-1	-1	-1	-1	-1	-1	-1	-1	-1	0.496963	-1	-1	-1	-1	-1	-1	-1	-1	-1	-1	-1	-1	-1	-1	-1	-1	-1	-1	-1	-1	-1	-1	-1	-1	-1	-1	-1	0.585456
ABaraaaaap	-1	-1	0.824895	0.477593	-1	0.537915	-1	-1	-1	-1	-1	-1	-1	-1	-1	-1	-1	-1	-1	-1	0.496963	-1	-1	-1	-1	-1	-1	-1	-1	-1	-1	-1	-1	-1	-1	-1	-1	-1	-1	-1	-1	-1	-1	-1	-1	-1	-1	-1	0.585456
ABaraaaap	-1	-1	0.799176	-1	-1	-1	-1	0.310157	-1	-1	-1	-1	-1	-1	-1	-1	-1	-1	-1	-1	-1	-1	-1	-1	-1	-1	-1	-1	-1	0.572582	-1	-1	-1	-1	-1	-1	-1	-1	-1	-1	-1	-1	-1	-1	-1	-1	-1	-1	0.604077
ABaraaaapa	-1	-1	-1	0.484733	-1	0.565369	-1	0.350294	0.469852	-1	-1	-1	-1	-1	-1	-1	-1	-1	-1	-1	0.516957	-1	-1	-1	-1	-1	-1	-1	-1	0.68318	-1	-1	-1	-1	-1	-1	0.520195	-1	-1	-1	-1	-1	-1	-1	-1	-1	-1	-1	0.623281
ABaraaappp	-1	0.367598	0.719374	-1	0.674595	0.554015	-1	-1	-1	-1	-1	-1	-1	-1	-1	-1	-1	-1	-1	-1	-1	-1	-1	-1	-1	-1	-1	-1	-1	-1	-1	-1	-1	-1	-1	-1	0.511083	-1	-1	-1	-1	-1	-1	-1	-1	-1	-1	-1	0.567071
ABaraaapppa	-1	-1	-1	-1	-1	0.708382	-1	-1	-1	-1	0.760893	-1	-1	-1	-1	-1	-1	-1	0.583487	-1	-1	-1	-1	-1	-1	-1	-1	-1	-1	-1	-1	-1	-1	-1	-1	-1	0.53007	0.598399	-1	-1	-1	-1	0.679619	-1	-1	-1	-1	0.608182	0.469413
ABalpaappaa	-1	-1	-1	-1	-1	0.708382	-1	-1	-1	-1	0.760893	-1	-1	-1	-1	-1	-1	-1	0.583487	-1	-1	-1	-1	-1	-1	-1	-1	-1	-1	-1	-1	-1	-1	-1	-1	-1	0.53007	0.598399	-1	-1	-1	-1	0.679619	-1	-1	-1	-1	0.608182	0.469413
ABaraapaaa	0.617652	-1	-1	0	-1	0.548919	-1	0.590897	-1	-1	0	-1	-1	-1	-1	-1	-1	-1	-1	-1	0.568211	-1	-1	-1	0.38031	0.644989	-1	-1	-1	-1	-1	-1	-1	-1	-1	-1	0.523162	-1	-1	-1	-1	-1	-1	-1	-1	-1	-1	-1	0.460234
ABaraappaa	-1	-1	-1	-1	0.635024	0.451406	-1	0.52787	-1	-1	-1	-1	-1	-1	-1	-1	-1	-1	-1	-1	0.491997	-1	0.616134	-1	0	-1	-1	-1	-1	0.682627	-1	-1	-1	-1	-1	-1	0.326734	-1	-1	0.41721	-1	-1	0.629838	-1	-1	-1	-1	-1	0.532407
ABaraapa	0.578724	-1	0.746545	-1	-1	-1	-1	-1	-1	0.391145	-1	-1	-1	-1	-1	-1	-1	-1	-1	-1	-1	0.520927	0.663835	-1	-1	-1	-1	-1	-1	0.433049	-1	-1	-1	-1	-1	-1	0.478711	-1	-1	-1	-1	-1	-1	-1	-1	-1	-1	-1	0.604896
ABaraapp	0.578724	-1	0.746545	-1	-1	-1	-1	-1	-1	0.391145	-1	-1	-1	-1	-1	-1	-1	-1	-1	-1	-1	0.520927	0.663835	-1	-1	-1	-1	-1	-1	0.433049	-1	-1	-1	-1	-1	-1	0.478711	-1	-1	-1	-1	-1	-1	-1	-1	-1	-1	-1	0.604896
ABaraapaa	-1	-1	-1	-1	-1	0.611635	-1	-1	-1	-1	-1	-1	-1	-1	-1	-1	-1	-1	-1	-1	0.446389	-1	0.626287	-1	-1	-1	-1	-1	-1	0.468318	-1	-1	-1	-1	-1	-1	-1	-1	-1	-1	-1	-1	-1	-1	-1	-1	-1	-1	0.565517
ABaraappa	-1	-1	-1	-1	-1	0.611635	-1	-1	-1	-1	-1	-1	-1	-1	-1	-1	-1	-1	-1	-1	0.446389	-1	0.626287	-1	-1	-1	-1	-1	-1	0.468318	-1	-1	-1	-1	-1	-1	-1	-1	-1	-1	-1	-1	-1	-1	-1	-1	-1	-1	0.565517
ABaraapaap	-1	-1	-1	-1	-1	0.585652	-1	-1	-1	-1	-1	-1	-1	-1	-1	-1	-1	-1	-1	-1	-1	0.634005	-1	-1	-1	-1	-1	-1	-1	0.530966	-1	-1	-1	-1	-1	-1	0.352368	-1	-1	-1	-1	-1	-1	-1	0.563497	-1	-1	-1	0.564493
ABaraappap	-1	-1	-1	-1	-1	0.585652	-1	-1	-1	-1	-1	-1	-1	-1	-1	-1	-1	-1	-1	-1	-1	0.634005	-1	-1	-1	-1	-1	-1	-1	0.530966	-1	-1	-1	-1	-1	-1	0.352368	-1	-1	-1	-1	-1	-1	-1	0.563497	-1	-1	-1	0.564493
ABaraapaapp	-1	-1	0.592091	0.533026	-1	0.746635	-1	-1	0.465898	-1	-1	-1	-1	-1	-1	-1	-1	-1	-1	-1	-1	-1	-1	-1	-1	-1	-1	-1	-1	-1	-1	-1	-1	-1	-1	-1	0.543386	0.420579	-1	-1	-1	-1	-1	-1	-1	-1	-1	0.73072	0.593028
ABaraappapp	-1	-1	0.592091	0.533026	-1	0.746635	-1	-1	0.465898	-1	-1	-1	-1	-1	-1	-1	-1	-1	-1	-1	-1	-1	-1	-1	-1	-1	-1	-1	-1	-1	-1	-1	-1	-1	-1	-1	0.543386	0.420579	-1	-1	-1	-1	-1	-1	-1	-1	-1	0.73072	0.593028
ABarapapppa	-1	-1	0.592091	0.533026	-1	0.746635	-1	-1	0.465898	-1	-1	-1	-1	-1	-1	-1	-1	-1	-1	-1	-1	-1	-1	-1	-1	-1	-1	-1	-1	-1	-1	-1	-1	-1	-1	-1	0.543386	0.420579	-1	-1	-1	-1	-1	-1	-1	-1	-1	0.73072	0.593028
ABaraapap	-1	-1	-1	-1	-1	0.645598	-1	-1	-1	-1	-1	-1	-1	-1	-1	-1	-1	-1	-1	-1	-1	0.625237	-1	-1	-1	-1	-1	-1	-1	-1	-1	-1	-1	-1	-1	-1	-1	-1	-1	-1	-1	-1	-1	-1	-1	-1	-1	-1	0.605756
ABaraappp	-1	-1	-1	-1	-1	0.645598	-1	-1	-1	-1	-1	-1	-1	-1	-1	-1	-1	-1	-1	-1	-1	0.625237	-1	-1	-1	-1	-1	-1	-1	-1	-1	-1	-1	-1	-1	-1	-1	-1	-1	-1	-1	-1	-1	-1	-1	-1	-1	-1	0.605756
ABaraapapa	-1	-1	0.804278	-1	-1	0.574959	-1	-1	-1	-1	-1	-1	-1	-1	-1	-1	-1	-1	-1	-1	0.547955	-1	-1	-1	-1	-1	-1	-1	-1	0.602868	-1	-1	-1	-1	-1	-1	0	-1	-1	-1	-1	-1	-1	-1	-1	-1	-1	-1	0.633995
ABaraapppa	-1	-1	0.804278	-1	-1	0.574959	-1	-1	-1	-1	-1	-1	-1	-1	-1	-1	-1	-1	-1	-1	0.547955	-1	-1	-1	-1	-1	-1	-1	-1	0.602868	-1	-1	-1	-1	-1	-1	0	-1	-1	-1	-1	-1	-1	-1	-1	-1	-1	-1	0.633995
ABaraapapaa	-1	-1	0.58896	-1	-1	0.660461	-1	-1	0.479411	-1	-1	-1	-1	-1	0.615561	-1	-1	-1	-1	-1	0.588861	-1	-1	-1	-1	0.680617	-1	-1	-1	-1	-1	-1	-1	-1	-1	-1	0.479678	-1	-1	-1	-1	-1	0.4435	-1	-1	-1	-1	-1	0.526508
ABaraapppaa	-1	-1	0.58896	-1	-1	0.660461	-1	-1	0.479411	-1	-1	-1	-1	-1	0.615561	-1	-1	-1	-1	-1	0.588861	-1	-1	-1	-1	0.680617	-1	-1	-1	-1	-1	-1	-1	-1	-1	-1	0.479678	-1	-1	-1	-1	-1	0.4435	-1	-1	-1	-1	-1	0.526508
ABaraapapp	-1	-1	0.660226	-1	-1	-1	-1	-1	-1	-1	-1	-1	-1	-1	-1	-1	-1	-1	-1	-1	0.531152	-1	-1	-1	-1	-1	-1	-1	-1	0.598431	-1	0.649591	-1	-1	-1	-1	0	-1	-1	-1	-1	-1	-1	-1	-1	-1	-1	-1	0.59635
ABaraapppp	-1	-1	0.660226	-1	-1	-1	-1	-1	-1	-1	-1	-1	-1	-1	-1	-1	-1	-1	-1	-1	0.531152	-1	-1	-1	-1	-1	-1	-1	-1	0.598431	-1	0.649591	-1	-1	-1	-1	0	-1	-1	-1	-1	-1	-1	-1	-1	-1	-1	-1	0.59635
ABarapa	0.574072	-1	0.770508	-1	0.568631	0.68472	-1	-1	-1	-1	-1	-1	-1	-1	-1	-1	-1	-1	-1	-1	-1	-1	0.715148	-1	0.546891	-1	-1	-1	-1	0	-1	-1	-1	-1	-1	-1	0.536883	-1	-1	-1	-1	-1	-1	-1	-1	-1	-1	-1	0.656241
ABarapapap	-1	-1	-1	-1	-1	0.538266	-1	-1	-1	-1	-1	-1	-1	-1	-1	-1	-1	-1	-1	-1	-1	0.639919	0.66696	-1	-1	-1	-1	-1	-1	-1	-1	-1	-1	-1	-1	-1	0.405856	-1	-1	-1	-1	0.323777	-1	-1	-1	-1	-1	-1	0.580349
ABarapapapp	0.43534	-1	0.654509	-1	-1	0.727849	-1	-1	-1	-1	-1	-1	-1	-1	-1	-1	-1	-1	-1	-1	0.896732	-1	-1	-1	-1	1	-1	-1	0.929377	0.718269	-1	-1	-1	0.936164	-1	0.885156	0	-1	-1	-1	-1	-1	-1	-1	-1	-1	-1	-1	0.759908
ABarappaaa	-1	-1	-1	-1	-1	0.500518	-1	-1	-1	-1	-1	-1	-1	-1	-1	-1	-1	-1	-1	-1	-1	-1	-1	0.574698	0.427709	-1	-1	-1	-1	-1	-1	0.50211	-1	-1	-1	-1	-1	-1	-1	-1	-1	0	-1	-1	-1	-1	-1	0.603529	0.514912
ABarpaa	-1	-1	0.764506	-1	0.569213	0.696684	-1	-1	-1	-1	-1	-1	-1	-1	-1	-1	-1	-1	-1	-1	-1	-1	0.728672	0.626232	-1	-1	-1	-1	-1	0	-1	-1	-1	-1	-1	-1	-1	-1	0.763442	-1	-1	-1	-1	-1	-1	-1	-1	-1	0.640682
ABarpaaa	-1	-1	-1	-1	-1	-1	-1	-1	-1	-1	-1	-1	-1	-1	-1	-1	-1	-1	-1	-1	-1	-1	-1	0.648879	-1	-1	-1	-1	-1	0.410101	-1	-1	-1	-1	-1	-1	-1	-1	-1	-1	-1	-1	-1	-1	-1	-1	-1	-1	0.567667
ABarpaaaa	-1	-1	0.816466	-1	0.687666	-1	-1	-1	-1	-1	-1	-1	-1	-1	-1	-1	-1	-1	0.435084	0.721842	-1	-1	0.710369	0.669845	-1	-1	-1	-1	-1	-1	-1	-1	-1	-1	-1	-1	-1	-1	-1	-1	-1	-1	-1	-1	-1	-1	-1	-1	0.696604
ABarpaaaaa	-1	-1	-1	-1	-1	0.484368	-1	-1	-1	-1	-1	-1	-1	-1	-1	-1	-1	-1	-1	0.702066	-1	-1	0.741547	0.662478	-1	-1	-1	-1	-1	-1	-1	-1	-1	-1	-1	-1	0	-1	-1	-1	-1	-1	-1	-1	-1	-1	-1	-1	0.670682
ABarpaaaap	-1	-1	-1	-1	-1	-1	-1	-1	-1	0.444372	-1	-1	-1	-1	-1	-1	-1	-1	-1	-1	-1	-1	0.662765	0.733247	-1	-1	-1	-1	-1	-1	-1	-1	-1	-1	-1	-1	-1	-1	-1	-1	-1	-1	-1	-1	-1	-1	-1	-1	0.556022
ABarpaaapa	-1	-1	-1	-1	-1	-1	-1	-1	-1	0.444372	-1	-1	-1	-1	-1	-1	-1	-1	-1	-1	-1	-1	0.662765	0.733247	-1	-1	-1	-1	-1	-1	-1	-1	-1	-1	-1	-1	-1	-1	-1	-1	-1	-1	-1	-1	-1	-1	-1	-1	0.556022
ABarpaaaapp	-1	-1	0.638838	-1	-1	0.616313	-1	-1	-1	0.774417	1	-1	-1	0.69374	-1	-1	-1	-1	0.423229	0.833592	-1	-1	-1	0.813596	-1	-1	-1	-1	-1	-1	-1	-1	-1	-1	-1	-1	-1	-1	-1	0.675143	-1	0	-1	-1	-1	-1	-1	-1	-1
ABarpaaapap	-1	-1	0.638838	-1	-1	0.616313	-1	-1	-1	0.774417	1	-1	-1	0.69374	-1	-1	-1	-1	0.423229	0.833592	-1	-1	-1	0.813596	-1	-1	-1	-1	-1	-1	-1	-1	-1	-1	-1	-1	-1	-1	-1	0.675143	-1	0	-1	-1	-1	-1	-1	-1	-1
ABplpaaapap	-1	-1	0.638838	-1	-1	0.616313	-1	-1	-1	0.774417	1	-1	-1	0.69374	-1	-1	-1	-1	0.423229	0.833592	-1	-1	-1	0.813596	-1	-1	-1	-1	-1	-1	-1	-1	-1	-1	-1	-1	-1	-1	-1	0.675143	-1	0	-1	-1	-1	-1	-1	-1	-1
ABprpaaapap	-1	-1	0.638838	-1	-1	0.616313	-1	-1	-1	0.774417	1	-1	-1	0.69374	-1	-1	-1	-1	0.423229	0.833592	-1	-1	-1	0.813596	-1	-1	-1	-1	-1	-1	-1	-1	-1	-1	-1	-1	-1	-1	-1	0.675143	-1	0	-1	-1	-1	-1	-1	-1	-1
ABarpaaap	-1	-1	0.836143	-1	-1	-1	-1	-1	-1	-1	-1	-1	-1	-1	-1	-1	-1	-1	-1	0.677707	-1	-1	-1	0.61351	-1	-1	-1	-1	-1	0.578859	-1	-1	-1	-1	-1	-1	-1	-1	-1	-1	-1	-1	-1	-1	-1	-1	-1	-1	0.674186
ABarpaap	0.652438	-1	0.759117	-1	0.618939	0.595326	-1	-1	-1	-1	-1	-1	-1	-1	-1	-1	-1	-1	-1	-1	-1	-1	-1	-1	-1	-1	-1	-1	-1	0.521928	-1	-1	-1	-1	-1	-1	-1	-1	0.9434	-1	-1	-1	-1	-1	-1	-1	-1	-1	0.604972
ABarpaapaa	0.836727	-1	0.444444	-1	-1	0.784723	-1	-1	-1	-1	0.599488	-1	-1	-1	-1	-1	-1	-1	-1	-1	-1	-1	-1	-1	0	-1	-1	-1	-1	-1	-1	-1	-1	-1	-1	-1	-1	-1	0.947916	-1	1	-1	-1	-1	-1	-1	-1	-1	-1
ABarpaapap	0.807235	-1	0	-1	-1	0.745864	-1	-1	-1	-1	0.63891	-1	-1	-1	-1	-1	-1	-1	-1	-1	-1	-1	-1	-1	-1	-1	-1	-1	-1	-1	-1	-1	-1	-1	-1	-1	-1	-1	-1	-1	1	-1	-1	-1	-1	-1	-1	-1	-1
ABarpaappa	0.807235	-1	0	-1	-1	0.745864	-1	-1	-1	-1	0.63891	-1	-1	-1	-1	-1	-1	-1	-1	-1	-1	-1	-1	-1	-1	-1	-1	-1	-1	-1	-1	-1	-1	-1	-1	-1	-1	-1	-1	-1	1	-1	-1	-1	-1	-1	-1	-1	-1
ABarpaappp	0.807235	-1	0	-1	-1	0.745864	-1	-1	-1	-1	0.63891	-1	-1	-1	-1	-1	-1	-1	-1	-1	-1	-1	-1	-1	-1	-1	-1	-1	-1	-1	-1	-1	-1	-1	-1	-1	-1	-1	-1	-1	1	-1	-1	-1	-1	-1	-1	-1	-1
ABarpaapa	-1	-1	0.717908	-1	-1	0.723661	-1	-1	-1	-1	-1	-1	-1	-1	-1	-1	-1	-1	-1	-1	-1	-1	-1	-1	-1	-1	-1	-1	-1	0.632432	-1	-1	-1	-1	-1	-1	-1	-1	1	-1	-1	0	-1	-1	-1	-1	-1	-1	0.66929
ABarpaapp	-1	-1	0.717908	-1	-1	0.723661	-1	-1	-1	-1	-1	-1	-1	-1	-1	-1	-1	-1	-1	-1	-1	-1	-1	-1	-1	-1	-1	-1	-1	0.632432	-1	-1	-1	-1	-1	-1	-1	-1	1	-1	-1	0	-1	-1	-1	-1	-1	-1	0.66929
ABarpap	0.649309	-1	0.759534	-1	0.635211	0.689761	-1	-1	-1	-1	-1	-1	-1	-1	-1	-1	-1	-1	-1	-1	-1	-1	-1	0.661831	-1	-1	-1	-1	-1	0	-1	-1	-1	-1	-1	-1	-1	-1	0.798833	-1	-1	-1	-1	-1	-1	-1	-1	-1	0.646268
ABplaaa	0.649309	-1	0.759534	-1	0.635211	0.689761	-1	-1	-1	-1	-1	-1	-1	-1	-1	-1	-1	-1	-1	-1	-1	-1	-1	0.661831	-1	-1	-1	-1	-1	0	-1	-1	-1	-1	-1	-1	-1	-1	0.798833	-1	-1	-1	-1	-1	-1	-1	-1	-1	0.646268
ABarpapa	0.509752	-1	0.695966	-1	-1	-1	-1	-1	-1	-1	-1	-1	-1	-1	-1	-1	-1	-1	-1	-1	-1	-1	0.660705	0.624265	-1	-1	-1	-1	-1	0	-1	-1	-1	-1	-1	-1	0	-1	0.8591	-1	-1	-1	-1	-1	-1	-1	-1	-1	0.582413
ABplaaaa	0.509752	-1	0.695966	-1	-1	-1	-1	-1	-1	-1	-1	-1	-1	-1	-1	-1	-1	-1	-1	-1	-1	-1	0.660705	0.624265	-1	-1	-1	-1	-1	0	-1	-1	-1	-1	-1	-1	0	-1	0.8591	-1	-1	-1	-1	-1	-1	-1	-1	-1	0.582413
ABarpapaa	0.663418	-1	0.785943	-1	-1	0.652784	-1	-1	-1	-1	-1	-1	-1	-1	-1	-1	-1	-1	0.316099	0.758099	-1	-1	-1	0.660988	-1	-1	-1	-1	-1	0.55379	-1	-1	-1	-1	-1	-1	-1	-1	-1	-1	-1	-1	-1	-1	-1	-1	-1	-1	0.654823
ABplaaaaa	0.663418	-1	0.785943	-1	-1	0.652784	-1	-1	-1	-1	-1	-1	-1	-1	-1	-1	-1	-1	0.316099	0.758099	-1	-1	-1	0.660988	-1	-1	-1	-1	-1	0.55379	-1	-1	-1	-1	-1	-1	-1	-1	-1	-1	-1	-1	-1	-1	-1	-1	-1	-1	0.654823
ABarpapaaa	-1	-1	0.847738	-1	0.71147	-1	-1	-1	-1	-1	-1	-1	-1	-1	-1	-1	-1	-1	0.418142	0.855568	-1	-1	-1	0.734978	-1	-1	-1	-1	-1	0.700784	-1	-1	-1	-1	-1	-1	0.529144	-1	-1	-1	-1	0	-1	-1	-1	-1	-1	-1	0.640681
ABplaaaaaa	-1	-1	0.847738	-1	0.71147	-1	-1	-1	-1	-1	-1	-1	-1	-1	-1	-1	-1	-1	0.418142	0.855568	-1	-1	-1	0.734978	-1	-1	-1	-1	-1	0.700784	-1	-1	-1	-1	-1	-1	0.529144	-1	-1	-1	-1	0	-1	-1	-1	-1	-1	-1	0.640681
ABarpapaap	0.624158	-1	0.795429	-1	-1	0.608093	-1	-1	-1	-1	-1	-1	-1	-1	-1	-1	-1	-1	-1	-1	-1	-1	0.674852	0.748551	-1	-1	-1	-1	-1	0.692527	-1	-1	-1	-1	-1	-1	0.403777	-1	-1	-1	-1	-1	0.672289	-1	-1	-1	-1	-1	0.658007
ABplaaaaap	0.624158	-1	0.795429	-1	-1	0.608093	-1	-1	-1	-1	-1	-1	-1	-1	-1	-1	-1	-1	-1	-1	-1	-1	0.674852	0.748551	-1	-1	-1	-1	-1	0.692527	-1	-1	-1	-1	-1	-1	0.403777	-1	-1	-1	-1	-1	0.672289	-1	-1	-1	-1	-1	0.658007
ABarpapaapp	-1	-1	0.667863	-1	-1	0.722421	-1	0.487068	0.476384	0.666849	-1	-1	-1	-1	-1	-1	-1	-1	-1	-1	-1	-1	-1	0.809846	-1	0.779367	-1	-1	-1	-1	-1	-1	-1	0.908859	-1	-1	-1	-1	-1	-1	-1	-1	-1	-1	-1	-1	-1	-1	0.611909
ABplaaaaapp	-1	-1	0.667863	-1	-1	0.722421	-1	0.487068	0.476384	0.666849	-1	-1	-1	-1	-1	-1	-1	-1	-1	-1	-1	-1	-1	0.809846	-1	0.779367	-1	-1	-1	-1	-1	-1	-1	0.908859	-1	-1	-1	-1	-1	-1	-1	-1	-1	-1	-1	-1	-1	-1	0.611909
ABarpapaappa	-1	-1	0.971582	-1	0.744709	0.896676	-1	-1	-1	1	-1	-1	-1	-1	-1	-1	-1	-1	-1	-1	-1	-1	-1	0.879257	-1	0.88394	-1	-1	0.775922	0.743614	-1	-1	-1	-1	-1	-1	0.703158	-1	-1	-1	-1	-1	-1	-1	-1	-1	-1	-1	-1
ABplaaaaappa	-1	-1	0.971582	-1	0.744709	0.896676	-1	-1	-1	1	-1	-1	-1	-1	-1	-1	-1	-1	-1	-1	-1	-1	-1	0.879257	-1	0.88394	-1	-1	0.775922	0.743614	-1	-1	-1	-1	-1	-1	0.703158	-1	-1	-1	-1	-1	-1	-1	-1	-1	-1	-1	-1
ABplpaappppa	-1	-1	0.971582	-1	0.744709	0.896676	-1	-1	-1	1	-1	-1	-1	-1	-1	-1	-1	-1	-1	-1	-1	-1	-1	0.879257	-1	0.88394	-1	-1	0.775922	0.743614	-1	-1	-1	-1	-1	-1	0.703158	-1	-1	-1	-1	-1	-1	-1	-1	-1	-1	-1	-1
ABprpaappppa	-1	-1	0.971582	-1	0.744709	0.896676	-1	-1	-1	1	-1	-1	-1	-1	-1	-1	-1	-1	-1	-1	-1	-1	-1	0.879257	-1	0.88394	-1	-1	0.775922	0.743614	-1	-1	-1	-1	-1	-1	0.703158	-1	-1	-1	-1	-1	-1	-1	-1	-1	-1	-1	-1
ABarpapaappp	-1	-1	1	-1	-1	0.800565	-1	0.591924	0.403554	-1	-1	-1	-1	-1	0.824957	-1	-1	-1	-1	-1	-1	-1	-1	-1	-1	0.875014	-1	-1	-1	-1	-1	-1	-1	0.882957	-1	-1	0.523765	-1	-1	0.610571	-1	0	-1	-1	-1	-1	-1	-1	0.803876
ABplaaaaappp	-1	-1	1	-1	-1	0.800565	-1	0.591924	0.403554	-1	-1	-1	-1	-1	0.824957	-1	-1	-1	-1	-1	-1	-1	-1	-1	-1	0.875014	-1	-1	-1	-1	-1	-1	-1	0.882957	-1	-1	0.523765	-1	-1	0.610571	-1	0	-1	-1	-1	-1	-1	-1	0.803876
ABarpapap	0.585699	-1	0.719724	-1	-1	0.588817	-1	-1	0.522377	-1	0	-1	-1	-1	-1	-1	-1	-1	-1	-1	-1	-1	0.701833	-1	-1	-1	-1	-1	-1	-1	-1	-1	-1	-1	-1	-1	0	-1	0.897669	0.516068	-1	-1	-1	-1	-1	-1	-1	-1	0.571852
ABplaaaap	0.585699	-1	0.719724	-1	-1	0.588817	-1	-1	0.522377	-1	0	-1	-1	-1	-1	-1	-1	-1	-1	-1	-1	-1	0.701833	-1	-1	-1	-1	-1	-1	-1	-1	-1	-1	-1	-1	-1	0	-1	0.897669	0.516068	-1	-1	-1	-1	-1	-1	-1	-1	0.571852
ABarpapapa	-1	-1	0.628634	-1	-1	0.665695	-1	-1	0.62768	-1	-1	-1	-1	-1	-1	-1	-1	-1	-1	-1	-1	-1	-1	-1	-1	-1	-1	-1	-1	0.699899	-1	-1	-1	-1	-1	-1	-1	-1	1	-1	0.932675	-1	0.599548	-1	-1	-1	-1	-1	0.734389
ABarpapapp	-1	-1	0.628634	-1	-1	0.665695	-1	-1	0.62768	-1	-1	-1	-1	-1	-1	-1	-1	-1	-1	-1	-1	-1	-1	-1	-1	-1	-1	-1	-1	0.699899	-1	-1	-1	-1	-1	-1	-1	-1	1	-1	0.932675	-1	0.599548	-1	-1	-1	-1	-1	0.734389
ABplaaaapa	-1	-1	0.628634	-1	-1	0.665695	-1	-1	0.62768	-1	-1	-1	-1	-1	-1	-1	-1	-1	-1	-1	-1	-1	-1	-1	-1	-1	-1	-1	-1	0.699899	-1	-1	-1	-1	-1	-1	-1	-1	1	-1	0.932675	-1	0.599548	-1	-1	-1	-1	-1	0.734389
ABplaaaapp	-1	-1	0.628634	-1	-1	0.665695	-1	-1	0.62768	-1	-1	-1	-1	-1	-1	-1	-1	-1	-1	-1	-1	-1	-1	-1	-1	-1	-1	-1	-1	0.699899	-1	-1	-1	-1	-1	-1	-1	-1	1	-1	0.932675	-1	0.599548	-1	-1	-1	-1	-1	0.734389
ABarpapp	-1	-1	-1	-1	-1	0.547017	-1	-1	-1	-1	-1	-1	-1	-1	-1	-1	-1	-1	-1	-1	-1	-1	0.675256	0.618458	-1	-1	-1	-1	-1	-1	-1	-1	-1	-1	-1	-1	-1	-1	0.873186	-1	-1	-1	0.455056	-1	-1	-1	-1	-1	0.665543
ABplaaap	-1	-1	-1	-1	-1	0.547017	-1	-1	-1	-1	-1	-1	-1	-1	-1	-1	-1	-1	-1	-1	-1	-1	0.675256	0.618458	-1	-1	-1	-1	-1	-1	-1	-1	-1	-1	-1	-1	-1	-1	0.873186	-1	-1	-1	0.455056	-1	-1	-1	-1	-1	0.665543
ABarpappa	-1	-1	0.680671	-1	-1	0.607641	-1	-1	-1	-1	-1	-1	-1	-1	-1	-1	-1	-1	-1	-1	-1	-1	-1	-1	-1	-1	-1	-1	-1	-1	-1	-1	-1	-1	-1	-1	-1	-1	1	-1	-1	-1	-1	-1	-1	-1	-1	-1	0.672644
ABplaaapa	-1	-1	0.680671	-1	-1	0.607641	-1	-1	-1	-1	-1	-1	-1	-1	-1	-1	-1	-1	-1	-1	-1	-1	-1	-1	-1	-1	-1	-1	-1	-1	-1	-1	-1	-1	-1	-1	-1	-1	1	-1	-1	-1	-1	-1	-1	-1	-1	-1	0.672644
ABarpappaa	-1	-1	0.66983	-1	-1	-1	-1	-1	0.484759	0.725959	0.921594	-1	-1	-1	0.798654	-1	-1	-1	-1	0.654148	-1	-1	0.669893	0.723839	-1	0.942926	-1	-1	-1	-1	-1	-1	-1	-1	-1	-1	0.510482	-1	-1	-1	-1	-1	0.418494	-1	-1	-1	-1	-1	0.606341
ABplaaapaa	-1	-1	0.66983	-1	-1	-1	-1	-1	0.484759	0.725959	0.921594	-1	-1	-1	0.798654	-1	-1	-1	-1	0.654148	-1	-1	0.669893	0.723839	-1	0.942926	-1	-1	-1	-1	-1	-1	-1	-1	-1	-1	0.510482	-1	-1	-1	-1	-1	0.418494	-1	-1	-1	-1	-1	0.606341
ABarpappap	0.705948	-1	0.585462	-1	-1	0.725686	-1	-1	-1	-1	0.569372	-1	-1	-1	-1	-1	-1	-1	-1	-1	-1	-1	-1	-1	0.354888	-1	-1	-1	-1	-1	-1	-1	-1	-1	-1	-1	0.436578	-1	1	-1	0.876175	-1	-1	-1	-1	-1	-1	0.406647	0.609057
ABplaaapap	0.705948	-1	0.585462	-1	-1	0.725686	-1	-1	-1	-1	0.569372	-1	-1	-1	-1	-1	-1	-1	-1	-1	-1	-1	-1	-1	0.354888	-1	-1	-1	-1	-1	-1	-1	-1	-1	-1	-1	0.436578	-1	1	-1	0.876175	-1	-1	-1	-1	-1	-1	0.406647	0.609057
ABarpappp	-1	-1	0.702804	-1	-1	0.649096	-1	-1	-1	-1	-1	-1	-1	-1	-1	-1	-1	-1	-1	-1	-1	-1	-1	-1	-1	-1	-1	-1	-1	0.655733	-1	-1	-1	-1	-1	-1	-1	-1	1	-1	-1	-1	-1	-1	-1	-1	-1	-1	0.634932
ABplaaapp	-1	-1	0.702804	-1	-1	0.649096	-1	-1	-1	-1	-1	-1	-1	-1	-1	-1	-1	-1	-1	-1	-1	-1	-1	-1	-1	-1	-1	-1	-1	0.655733	-1	-1	-1	-1	-1	-1	-1	-1	1	-1	-1	-1	-1	-1	-1	-1	-1	-1	0.634932
ABarpapppa	-1	-1	0.572684	-1	-1	0.751178	-1	-1	-1	-1	0	-1	-1	-1	-1	-1	-1	-1	-1	-1	-1	-1	-1	-1	0.278285	-1	-1	-1	-1	-1	-1	-1	-1	-1	-1	-1	-1	-1	1	-1	-1	-1	-1	-1	-1	-1	-1	-1	0.636308
ABarpapppp	-1	-1	0.572684	-1	-1	0.751178	-1	-1	-1	-1	0	-1	-1	-1	-1	-1	-1	-1	-1	-1	-1	-1	-1	-1	0.278285	-1	-1	-1	-1	-1	-1	-1	-1	-1	-1	-1	-1	-1	1	-1	-1	-1	-1	-1	-1	-1	-1	-1	0.636308
ABplaaappa	-1	-1	0.572684	-1	-1	0.751178	-1	-1	-1	-1	0	-1	-1	-1	-1	-1	-1	-1	-1	-1	-1	-1	-1	-1	0.278285	-1	-1	-1	-1	-1	-1	-1	-1	-1	-1	-1	-1	-1	1	-1	-1	-1	-1	-1	-1	-1	-1	-1	0.636308
ABplaaappp	-1	-1	0.572684	-1	-1	0.751178	-1	-1	-1	-1	0	-1	-1	-1	-1	-1	-1	-1	-1	-1	-1	-1	-1	-1	0.278285	-1	-1	-1	-1	-1	-1	-1	-1	-1	-1	-1	-1	-1	1	-1	-1	-1	-1	-1	-1	-1	-1	-1	0.636308
ABarppa	0.59642	-1	0.733379	-1	-1	0.655872	-1	-1	-1	-1	-1	0.764566	-1	-1	-1	-1	-1	-1	-1	-1	-1	-1	-1	-1	-1	-1	-1	-1	-1	0	-1	-1	-1	-1	-1	-1	0	-1	0.861937	-1	-1	-1	-1	-1	-1	-1	-1	-1	0.612699
ABarppp	0.59642	-1	0.733379	-1	-1	0.655872	-1	-1	-1	-1	-1	0.764566	-1	-1	-1	-1	-1	-1	-1	-1	-1	-1	-1	-1	-1	-1	-1	-1	-1	0	-1	-1	-1	-1	-1	-1	0	-1	0.861937	-1	-1	-1	-1	-1	-1	-1	-1	-1	0.612699
ABarppaaa	-1	-1	-1	-1	-1	0.625909	-1	-1	-1	-1	-1	0.562552	-1	-1	-1	-1	-1	-1	-1	-1	-1	-1	-1	0.60705	-1	-1	-1	-1	-1	-1	-1	-1	-1	-1	-1	-1	-1	-1	0.987713	-1	-1	-1	-1	-1	-1	-1	-1	-1	0.593908
ABarpppaa	-1	-1	-1	-1	-1	0.625909	-1	-1	-1	-1	-1	0.562552	-1	-1	-1	-1	-1	-1	-1	-1	-1	-1	-1	0.60705	-1	-1	-1	-1	-1	-1	-1	-1	-1	-1	-1	-1	-1	-1	0.987713	-1	-1	-1	-1	-1	-1	-1	-1	-1	0.593908
ABarppaaaa	-1	-1	0.549764	-1	-1	0.622232	-1	-1	-1	0.700847	1	-1	-1	-1	-1	-1	-1	-1	-1	-1	-1	-1	0	0.752561	-1	-1	-1	-1	-1	-1	-1	-1	-1	-1	-1	-1	-1	-1	-1	-1	-1	-1	-1	-1	-1	-1	-1	-1	-1
ABarpppaaa	-1	-1	0.549764	-1	-1	0.622232	-1	-1	-1	0.700847	1	-1	-1	-1	-1	-1	-1	-1	-1	-1	-1	-1	0	0.752561	-1	-1	-1	-1	-1	-1	-1	-1	-1	-1	-1	-1	-1	-1	-1	-1	-1	-1	-1	-1	-1	-1	-1	-1	-1
ABarppaaap	-1	-1	0.580584	-1	-1	0.729172	-1	-1	-1	-1	0	-1	-1	-1	-1	-1	-1	-1	-1	-1	-1	-1	-1	0	-1	-1	-1	-1	-1	-1	-1	-1	-1	-1	-1	-1	-1	-1	1	-1	-1	-1	-1	-1	-1	-1	-1	-1	0.619981
ABarpppaap	-1	-1	0.580584	-1	-1	0.729172	-1	-1	-1	-1	0	-1	-1	-1	-1	-1	-1	-1	-1	-1	-1	-1	-1	0	-1	-1	-1	-1	-1	-1	-1	-1	-1	-1	-1	-1	-1	-1	1	-1	-1	-1	-1	-1	-1	-1	-1	-1	0.619981
ABarppaap	-1	-1	0.704138	-1	-1	0.659997	-1	-1	-1	-1	-1	0.708432	-1	-1	-1	-1	-1	-1	-1	-1	-1	-1	-1	-1	-1	-1	-1	-1	-1	0.681737	-1	-1	-1	-1	-1	-1	-1	-1	-1	-1	-1	-1	-1	-1	-1	-1	-1	-1	0.669393
ABarpppap	-1	-1	0.704138	-1	-1	0.659997	-1	-1	-1	-1	-1	0.708432	-1	-1	-1	-1	-1	-1	-1	-1	-1	-1	-1	-1	-1	-1	-1	-1	-1	0.681737	-1	-1	-1	-1	-1	-1	-1	-1	-1	-1	-1	-1	-1	-1	-1	-1	-1	-1	0.669393
ABarppaapa	0.82189	-1	0.469822	-1	-1	0.787324	-1	-1	-1	-1	0	0.512154	-1	-1	-1	-1	-1	-1	-1	-1	-1	-1	-1	-1	-1	-1	-1	-1	-1	-1	-1	-1	-1	-1	-1	-1	-1	-1	0.974802	-1	1	-1	-1	-1	-1	-1	-1	-1	0.622489
ABarpppapa	0.82189	-1	0.469822	-1	-1	0.787324	-1	-1	-1	-1	0	0.512154	-1	-1	-1	-1	-1	-1	-1	-1	-1	-1	-1	-1	-1	-1	-1	-1	-1	-1	-1	-1	-1	-1	-1	-1	-1	-1	0.974802	-1	1	-1	-1	-1	-1	-1	-1	-1	0.622489
ABarppaapp	0.797773	-1	0.704795	-1	-1	0.756571	0.501797	0.589556	0.588937	-1	-1	0.937717	-1	0.492961	-1	-1	-1	-1	-1	-1	-1	-1	-1	-1	-1	0.995732	-1	-1	-1	-1	-1	-1	-1	-1	0.719477	-1	0.384639	-1	-1	-1	-1	-1	-1	-1	-1	-1	-1	-1	0.816499
ABarpppapp	0.797773	-1	0.704795	-1	-1	0.756571	0.501797	0.589556	0.588937	-1	-1	0.937717	-1	0.492961	-1	-1	-1	-1	-1	-1	-1	-1	-1	-1	-1	0.995732	-1	-1	-1	-1	-1	-1	-1	-1	0.719477	-1	0.384639	-1	-1	-1	-1	-1	-1	-1	-1	-1	-1	-1	0.816499
ABarppaappa	-1	-1	-1	-1	0.883009	0.7247	-1	0.653558	0.641307	-1	0.741646	-1	-1	-1	-1	-1	-1	-1	-1	-1	-1	-1	-1	-1	-1	1	-1	-1	-1	-1	-1	-1	-1	-1	0.694594	-1	-1	-1	-1	-1	0	-1	-1	-1	-1	-1	-1	-1	0.744643
ABarppaappp	-1	-1	-1	-1	0.883009	0.7247	-1	0.653558	0.641307	-1	0.741646	-1	-1	-1	-1	-1	-1	-1	-1	-1	-1	-1	-1	-1	-1	1	-1	-1	-1	-1	-1	-1	-1	-1	0.694594	-1	-1	-1	-1	-1	0	-1	-1	-1	-1	-1	-1	-1	0.744643
ABarpppappa	-1	-1	-1	-1	0.883009	0.7247	-1	0.653558	0.641307	-1	0.741646	-1	-1	-1	-1	-1	-1	-1	-1	-1	-1	-1	-1	-1	-1	1	-1	-1	-1	-1	-1	-1	-1	-1	0.694594	-1	-1	-1	-1	-1	0	-1	-1	-1	-1	-1	-1	-1	0.744643
ABarpppappp	-1	-1	-1	-1	0.883009	0.7247	-1	0.653558	0.641307	-1	0.741646	-1	-1	-1	-1	-1	-1	-1	-1	-1	-1	-1	-1	-1	-1	1	-1	-1	-1	-1	-1	-1	-1	-1	0.694594	-1	-1	-1	-1	-1	0	-1	-1	-1	-1	-1	-1	-1	0.744643
ABarppap	-1	-1	0.695022	-1	-1	0.67689	-1	-1	-1	-1	-1	0.800129	-1	-1	-1	-1	-1	-1	-1	-1	-1	-1	0.689219	-1	-1	-1	-1	-1	-1	0	-1	-1	-1	-1	-1	-1	-1	-1	0.909071	-1	-1	-1	-1	-1	-1	-1	-1	-1	0.580624
ABarpppp	-1	-1	0.695022	-1	-1	0.67689	-1	-1	-1	-1	-1	0.800129	-1	-1	-1	-1	-1	-1	-1	-1	-1	-1	0.689219	-1	-1	-1	-1	-1	-1	0	-1	-1	-1	-1	-1	-1	-1	-1	0.909071	-1	-1	-1	-1	-1	-1	-1	-1	-1	0.580624
ABarppapa	-1	-1	0.670484	-1	-1	0.710139	-1	-1	-1	-1	-1	0.70517	-1	-1	-1	-1	-1	-1	-1	-1	-1	-1	-1	-1	-1	-1	-1	-1	-1	0.635678	-1	-1	-1	-1	-1	-1	-1	-1	1	-1	-1	-1	-1	-1	-1	-1	-1	-1	0.652202
ABarppppa	-1	-1	0.670484	-1	-1	0.710139	-1	-1	-1	-1	-1	0.70517	-1	-1	-1	-1	-1	-1	-1	-1	-1	-1	-1	-1	-1	-1	-1	-1	-1	0.635678	-1	-1	-1	-1	-1	-1	-1	-1	1	-1	-1	-1	-1	-1	-1	-1	-1	-1	0.652202
ABarppapaa	-1	-1	0.541403	-1	-1	0.782691	-1	-1	-1	-1	0	0.605113	-1	-1	-1	-1	-1	-1	-1	-1	-1	-1	-1	-1	-1	-1	-1	-1	-1	-1	-1	-1	-1	-1	-1	-1	-1	-1	1	-1	-1	-1	-1	-1	-1	-1	-1	-1	0.521764
ABarppapap	-1	-1	0.541403	-1	-1	0.782691	-1	-1	-1	-1	0	0.605113	-1	-1	-1	-1	-1	-1	-1	-1	-1	-1	-1	-1	-1	-1	-1	-1	-1	-1	-1	-1	-1	-1	-1	-1	-1	-1	1	-1	-1	-1	-1	-1	-1	-1	-1	-1	0.521764
ABarppppaa	-1	-1	0.541403	-1	-1	0.782691	-1	-1	-1	-1	0	0.605113	-1	-1	-1	-1	-1	-1	-1	-1	-1	-1	-1	-1	-1	-1	-1	-1	-1	-1	-1	-1	-1	-1	-1	-1	-1	-1	1	-1	-1	-1	-1	-1	-1	-1	-1	-1	0.521764
ABarppppap	-1	-1	0.541403	-1	-1	0.782691	-1	-1	-1	-1	0	0.605113	-1	-1	-1	-1	-1	-1	-1	-1	-1	-1	-1	-1	-1	-1	-1	-1	-1	-1	-1	-1	-1	-1	-1	-1	-1	-1	1	-1	-1	-1	-1	-1	-1	-1	-1	-1	0.521764
ABarppapp	-1	-1	0.641631	-1	-1	0.65137	-1	-1	-1	-1	-1	0.617161	-1	-1	-1	-1	-1	-1	-1	-1	-1	-1	-1	-1	-1	-1	-1	-1	-1	-1	-1	-1	-1	-1	-1	-1	-1	-1	1	-1	-1	-1	-1	-1	-1	-1	-1	-1	0.686182
ABarppppp	-1	-1	0.641631	-1	-1	0.65137	-1	-1	-1	-1	-1	0.617161	-1	-1	-1	-1	-1	-1	-1	-1	-1	-1	-1	-1	-1	-1	-1	-1	-1	-1	-1	-1	-1	-1	-1	-1	-1	-1	1	-1	-1	-1	-1	-1	-1	-1	-1	-1	0.686182
ABarppappa	-1	-1	-1	-1	-1	0.796504	-1	-1	-1	-1	0	0.440672	-1	-1	-1	-1	-1	-1	-1	-1	-1	-1	-1	-1	-1	-1	-1	-1	-1	-1	-1	-1	-1	-1	-1	-1	-1	-1	1	-1	-1	-1	-1	-1	-1	-1	-1	-1	0.700059
ABarpppppa	-1	-1	-1	-1	-1	0.796504	-1	-1	-1	-1	0	0.440672	-1	-1	-1	-1	-1	-1	-1	-1	-1	-1	-1	-1	-1	-1	-1	-1	-1	-1	-1	-1	-1	-1	-1	-1	-1	-1	1	-1	-1	-1	-1	-1	-1	-1	-1	-1	0.700059
ABarppappp	0.828424	-1	0.582163	-1	-1	0.766062	-1	-1	-1	-1	0	-1	-1	-1	-1	-1	-1	-1	-1	-1	-1	-1	-1	-1	-1	-1	-1	-1	-1	0.614619	-1	-1	-1	-1	-1	-1	-1	-1	1	-1	-1	-1	-1	-1	-1	-1	-1	-1	0.709712
ABarpppppp	0.828424	-1	0.582163	-1	-1	0.766062	-1	-1	-1	-1	0	-1	-1	-1	-1	-1	-1	-1	-1	-1	-1	-1	-1	-1	-1	-1	-1	-1	-1	0.614619	-1	-1	-1	-1	-1	-1	-1	-1	1	-1	-1	-1	-1	-1	-1	-1	-1	-1	0.709712
ABarpa	0.670563	-1	0.837187	-1	0.52077	-1	-1	-1	-1	-1	-1	0.626792	-1	-1	-1	-1	-1	-1	-1	-1	-1	-1	0.737648	0.574412	-1	-1	-1	-1	-1	0	-1	-1	-1	-1	-1	-1	0.426441	-1	0.573239	-1	-1	-1	-1	0.706576	-1	-1	-1	-1	0.720884
ABarpp	0.670563	-1	0.837187	-1	0.52077	-1	-1	-1	-1	-1	-1	0.626792	-1	-1	-1	-1	-1	-1	-1	-1	-1	-1	0.737648	0.574412	-1	-1	-1	-1	-1	0	-1	-1	-1	-1	-1	-1	0.426441	-1	0.573239	-1	-1	-1	-1	0.706576	-1	-1	-1	-1	0.720884
ABplpaaaapa	0.735929	-1	0.319693	-1	-1	0.793383	-1	-1	-1	0.696625	0.986912	-1	-1	-1	-1	-1	-1	-1	-1	-1	-1	-1	-1	-1	-1	1	-1	-1	-1	0.771106	-1	-1	-1	-1	-1	-1	0.67774	-1	-1	-1	-1	-1	0.671261	-1	-1	-1	-1	-1	-1
ABplpapp	-1	-1	0.74779	-1	0.550209	0.664877	-1	-1	-1	-1	-1	-1	-1	-1	-1	-1	-1	-1	-1	-1	-1	0.584844	0.668941	-1	-1	-1	-1	-1	0.790322	0	-1	-1	-1	-1	-1	-1	0.490387	-1	-1	-1	-1	-1	-1	-1	-1	-1	-1	-1	0.62793
ABplpappa	-1	-1	0.802092	-1	-1	0.628201	-1	-1	-1	-1	-1	-1	-1	-1	-1	-1	-1	-1	-1	-1	-1	-1	-1	-1	-1	-1	-1	-1	0.821137	0.537265	-1	-1	-1	-1	-1	-1	0.494234	-1	-1	-1	-1	-1	-1	-1	-1	-1	-1	-1	0.644887
ABplpappaa	-1	-1	0.819364	-1	-1	0.537844	-1	-1	-1	-1	-1	-1	-1	-1	-1	-1	-1	-1	-1	-1	-1	-1	-1	-1	-1	-1	-1	-1	0.657757	-1	-1	-1	-1	-1	-1	-1	0.547755	-1	-1	-1	-1	-1	-1	-1	-1	-1	-1	-1	0.60247
ABplpappaap	-1	-1	0.747848	-1	-1	0.823762	-1	-1	-1	-1	-1	-1	-1	-1	-1	-1	-1	-1	-1	-1	-1	-1	-1	-1	-1	-1	-1	-1	0.951163	-1	-1	-1	-1	-1	-1	-1	0.612166	0.608496	-1	-1	-1	-1	-1	-1	-1	-1	-1	-1	0.758259
ABplpappp	0.572742	0.46857	0.71472	-1	0.574292	-1	-1	-1	-1	-1	-1	-1	-1	-1	-1	-1	-1	-1	-1	-1	-1	0.585099	0.647351	-1	-1	-1	-1	-1	0.808079	0.604142	-1	-1	-1	-1	-1	-1	0.426398	-1	-1	-1	-1	-1	-1	-1	-1	-1	-1	-1	0.605929
ABplpapppa	-1	0.36276	0.696374	-1	-1	0.438724	-1	-1	-1	-1	-1	-1	-1	-1	0.441649	-1	-1	-1	-1	-1	-1	-1	-1	-1	-1	-1	-1	-1	-1	-1	-1	-1	-1	-1	0.476829	-1	-1	-1	-1	-1	-1	-1	-1	-1	-1	-1	-1	-1	0.520845
ABplpapppaa	-1	0.47584	0.701848	-1	-1	0.677578	-1	-1	-1	-1	0.801369	-1	-1	-1	-1	-1	-1	-1	-1	-1	-1	-1	-1	-1	-1	-1	-1	-1	-1	-1	-1	-1	-1	-1	0.664789	-1	0.517627	-1	-1	0.680691	-1	-1	-1	-1	-1	-1	-1	0.569927	0.650383
ABplpapppap	-1	0.47584	0.701848	-1	-1	0.677578	-1	-1	-1	-1	0.801369	-1	-1	-1	-1	-1	-1	-1	-1	-1	-1	-1	-1	-1	-1	-1	-1	-1	-1	-1	-1	-1	-1	-1	0.664789	-1	0.517627	-1	-1	0.680691	-1	-1	-1	-1	-1	-1	-1	0.569927	0.650383
ABplpapppp	-1	0	-1	-1	-1	0.575586	-1	-1	0.442024	-1	-1	-1	-1	-1	-1	-1	-1	-1	-1	-1	-1	-1	0.614458	-1	-1	-1	-1	-1	-1	0.592456	-1	-1	-1	-1	-1	-1	-1	-1	-1	-1	-1	-1	-1	-1	-1	-1	-1	-1	0.590195
ABplpappppa	-1	-1	-1	-1	-1	-1	-1	-1	-1	-1	-1	-1	-1	-1	-1	-1	-1	-1	-1	-1	-1	-1	-1	-1	-1	0.793608	-1	-1	-1	-1	-1	-1	-1	-1	-1	-1	-1	0.485746	-1	-1	-1	-1	-1	-1	-1	-1	-1	-1	0.697502
ABplpappppp	-1	0.479942	-1	-1	-1	-1	-1	-1	-1	-1	-1	0.606719	-1	-1	-1	-1	-1	-1	-1	-1	-1	-1	-1	-1	-1	0.882145	-1	-1	-1	0.692799	-1	-1	-1	-1	0.585839	-1	0.593329	0.638269	-1	-1	-1	-1	-1	-1	-1	-1	-1	-1	0.659575
ABplppppaap	-1	-1	0.394136	-1	-1	0.641928	-1	-1	0.676181	0.554993	-1	-1	-1	-1	-1	-1	-1	-1	-1	-1	-1	-1	-1	-1	-1	0.947767	-1	-1	-1	-1	-1	-1	-1	-1	0.864134	-1	0.504569	0	-1	0.741761	0.481458	-1	0.679979	-1	-1	-1	-1	-1	0.525986
ABprppppaap	-1	-1	0.394136	-1	-1	0.641928	-1	-1	0.676181	0.554993	-1	-1	-1	-1	-1	-1	-1	-1	-1	-1	-1	-1	-1	-1	-1	0.947767	-1	-1	-1	-1	-1	-1	-1	-1	0.864134	-1	0.504569	0	-1	0.741761	0.481458	-1	0.679979	-1	-1	-1	-1	-1	0.525986
ABplppppapa	-1	-1	-1	-1	0.5719	0.550235	-1	-1	-1	0.278722	0.596715	-1	-1	-1	-1	-1	-1	-1	-1	-1	-1	-1	-1	-1	-1	-1	-1	-1	-1	0	-1	-1	-1	-1	0	-1	-1	-1	-1	-1	-1	-1	-1	-1	-1	-1	-1	-1	0.486574
ABplppppapp	-1	-1	-1	-1	0.5719	0.550235	-1	-1	-1	0.278722	0.596715	-1	-1	-1	-1	-1	-1	-1	-1	-1	-1	-1	-1	-1	-1	-1	-1	-1	-1	0	-1	-1	-1	-1	0	-1	-1	-1	-1	-1	-1	-1	-1	-1	-1	-1	-1	-1	0.486574
ABprpaaaapa	-1	-1	-1	-1	-1	0.787753	-1	-1	-1	-1	0.914354	-1	-1	-1	-1	-1	-1	-1	-1	-1	-1	-1	0.715509	-1	-1	-1	-1	-1	0.645977	-1	-1	-1	-1	-1	-1	0.853913	0.777059	-1	-1	-1	0.837347	-1	-1	-1	-1	-1	0.704642	-1	-1
ABprpapp	0.610479	-1	0.787807	-1	0.602832	0.645105	-1	-1	-1	-1	-1	-1	-1	-1	-1	-1	-1	-1	-1	-1	-1	0.686078	0.710211	-1	-1	-1	-1	-1	-1	0	-1	-1	-1	-1	-1	-1	0.528161	-1	-1	-1	-1	-1	-1	-1	-1	-1	-1	-1	0.665879
ABprpappa	-1	-1	-1	-1	-1	0.656949	-1	-1	-1	-1	-1	-1	-1	-1	-1	-1	-1	-1	-1	-1	-1	-1	0.675438	-1	-1	-1	-1	-1	-1	0.622467	-1	0.538019	-1	-1	-1	-1	0.457935	-1	-1	-1	-1	0	-1	-1	-1	-1	-1	-1	0.627967
ABprpappaa	-1	-1	0.738949	-1	-1	0.468549	-1	-1	-1	-1	-1	-1	-1	-1	-1	-1	-1	-1	-1	-1	-1	-1	-1	-1	-1	0.63534	-1	-1	-1	0.704947	-1	0.576161	-1	-1	-1	-1	0.482808	-1	-1	-1	-1	-1	-1	-1	-1	-1	-1	-1	0.636348
ABprpappaaa	-1	-1	0.518076	-1	-1	0.596368	-1	-1	-1	-1	0.703312	-1	-1	-1	-1	-1	-1	1	-1	-1	-1	-1	0.709523	-1	-1	0.867121	-1	-1	-1	-1	0.457951	-1	-1	-1	-1	-1	-1	-1	-1	-1	-1	-1	0.657975	-1	-1	-1	0.6266	-1	0.541645
ABprpappaap	-1	-1	0.613934	-1	-1	0.789635	-1	-1	-1	-1	-1	-1	-1	-1	-1	-1	-1	0.878321	-1	-1	-1	-1	-1	-1	-1	1	-1	-1	-1	-1	-1	-1	-1	-1	-1	-1	0.638996	-1	-1	-1	-1	-1	0.76637	-1	-1	-1	0.719806	-1	0.72465
ABprpappap	-1	-1	0.743204	-1	-1	0.575995	-1	-1	-1	-1	-1	-1	-1	-1	0	-1	-1	-1	-1	-1	-1	0.609758	-1	-1	-1	-1	-1	-1	0.847084	-1	-1	-1	-1	-1	-1	-1	-1	-1	-1	-1	-1	-1	-1	-1	-1	-1	-1	-1	0.560497
ABprpappapa	-1	-1	0.649177	-1	-1	-1	-1	-1	-1	-1	-1	-1	-1	-1	-1	-1	-1	-1	-1	-1	-1	-1	-1	-1	-1	0.88564	-1	-1	-1	-1	-1	-1	-1	-1	-1	-1	-1	-1	-1	-1	-1	-1	-1	-1	-1	-1	-1	-1	0.679823
ABprpappp	-1	-1	-1	-1	-1	0.678179	-1	-1	-1	-1	-1	-1	-1	-1	0.460237	-1	-1	-1	-1	-1	-1	0.552885	0.652045	-1	-1	-1	-1	-1	-1	-1	-1	-1	-1	-1	-1	-1	0.434559	-1	-1	-1	-1	-1	-1	-1	-1	-1	-1	-1	0.588044
ABprpapppa	-1	-1	-1	-1	-1	-1	-1	-1	-1	-1	-1	-1	-1	-1	-1	-1	-1	-1	-1	-1	-1	-1	-1	-1	-1	0.632885	-1	-1	-1	-1	-1	0.534242	-1	0.805269	-1	-1	0.507157	-1	-1	-1	-1	-1	-1	-1	-1	-1	-1	-1	0.564718
ABprpapppap	-1	-1	0.622002	-1	-1	-1	-1	-1	-1	-1	0.542953	-1	-1	-1	-1	-1	-1	-1	-1	-1	-1	-1	-1	-1	-1	0.88939	-1	-1	-1	-1	-1	-1	-1	0.8467	-1	-1	0	0.38421	0.646879	-1	-1	-1	0.693095	-1	-1	-1	-1	-1	0.67353
ABprpapppp	-1	-1	0.694909	-1	-1	0.502936	-1	-1	-1	-1	-1	-1	-1	-1	-1	-1	-1	-1	-1	-1	-1	0.720605	-1	-1	-1	-1	-1	-1	-1	-1	-1	-1	-1	-1	0.548193	-1	0.404032	-1	-1	-1	-1	-1	-1	-1	-1	-1	-1	-1	0.546509
ABprpppaaaa	-1	-1	-1	-1	0.468746	0.590448	0.473287	-1	-1	-1	0.567679	-1	-1	-1	-1	-1	-1	-1	-1	-1	-1	-1	0.771171	-1	-1	0.396596	-1	-1	0.706926	0	-1	-1	-1	-1	0	-1	0	-1	-1	-1	-1	-1	-1	-1	-1	-1	-1	-1	-1
ABprppppapa	-1	0.303724	-1	-1	0.514229	0.460372	-1	-1	-1	-1	0	-1	-1	-1	-1	-1	-1	-1	-1	-1	-1	-1	-1	-1	-1	-1	-1	-1	0.667006	-1	-1	-1	-1	-1	0	-1	-1	-1	-1	-1	-1	-1	-1	-1	-1	-1	-1	-1	0.494764
ABprppppapp	-1	-1	0.588741	-1	-1	0.654144	-1	-1	-1	-1	0.449372	-1	-1	-1	-1	-1	-1	-1	-1	-1	-1	-1	0.706329	0.695567	-1	0.796032	-1	-1	-1	0.610029	-1	-1	-1	0.942581	-1	-1	-1	-1	-1	-1	-1	-1	-1	-1	-1	0.635114	-1	-1	0.694558
ABplaap	0.618398	-1	0.81606	-1	0.603304	-1	-1	-1	-1	-1	-1	-1	-1	-1	-1	-1	-1	-1	-1	-1	-1	-1	0.729194	0.702012	-1	-1	-1	-1	-1	0	-1	-1	-1	0.742949	-1	-1	0.631083	-1	0.444717	-1	-1	-1	-1	-1	-1	-1	-1	-1	0.681335
ABpraap	0.618398	-1	0.81606	-1	0.603304	-1	-1	-1	-1	-1	-1	-1	-1	-1	-1	-1	-1	-1	-1	-1	-1	-1	0.729194	0.702012	-1	-1	-1	-1	-1	0	-1	-1	-1	0.742949	-1	-1	0.631083	-1	0.444717	-1	-1	-1	-1	-1	-1	-1	-1	-1	0.681335
ABplaapa	-1	-1	0.774984	-1	0.619782	-1	-1	-1	-1	-1	-1	-1	-1	-1	-1	-1	-1	-1	-1	-1	-1	-1	0.714681	0.742124	-1	-1	-1	-1	-1	0	-1	-1	-1	0.752387	-1	-1	0.359824	-1	0.724472	-1	-1	-1	-1	-1	-1	-1	-1	-1	0.647381
ABpraapa	-1	-1	0.774984	-1	0.619782	-1	-1	-1	-1	-1	-1	-1	-1	-1	-1	-1	-1	-1	-1	-1	-1	-1	0.714681	0.742124	-1	-1	-1	-1	-1	0	-1	-1	-1	0.752387	-1	-1	0.359824	-1	0.724472	-1	-1	-1	-1	-1	-1	-1	-1	-1	0.647381
ABplaapaa	0.576567	-1	0.803771	-1	-1	0.631813	-1	-1	-1	-1	-1	-1	-1	-1	-1	-1	-1	-1	-1	-1	-1	-1	0.685896	0.662169	-1	-1	-1	-1	-1	0.557834	-1	-1	-1	-1	-1	-1	-1	-1	-1	-1	-1	-1	-1	-1	-1	-1	-1	-1	0.659681
ABpraapaa	0.576567	-1	0.803771	-1	-1	0.631813	-1	-1	-1	-1	-1	-1	-1	-1	-1	-1	-1	-1	-1	-1	-1	-1	0.685896	0.662169	-1	-1	-1	-1	-1	0.557834	-1	-1	-1	-1	-1	-1	-1	-1	-1	-1	-1	-1	-1	-1	-1	-1	-1	-1	0.659681
ABplaapaaa	-1	-1	0.844788	-1	-1	0.533705	-1	-1	-1	-1	-1	-1	-1	-1	-1	-1	-1	-1	-1	-1	-1	-1	-1	0.685761	-1	-1	-1	-1	-1	0.649555	-1	-1	-1	-1	-1	-1	-1	-1	-1	-1	-1	-1	-1	-1	-1	-1	-1	-1	0.597351
ABpraapaaa	-1	-1	0.844788	-1	-1	0.533705	-1	-1	-1	-1	-1	-1	-1	-1	-1	-1	-1	-1	-1	-1	-1	-1	-1	0.685761	-1	-1	-1	-1	-1	0.649555	-1	-1	-1	-1	-1	-1	-1	-1	-1	-1	-1	-1	-1	-1	-1	-1	-1	-1	0.597351
ABplaapaaaa	-1	-1	-1	-1	-1	0.706373	-1	-1	-1	-1	0.848754	-1	-1	-1	-1	-1	-1	-1	0.335187	-1	-1	-1	-1	0.689828	-1	-1	-1	-1	-1	-1	-1	-1	-1	-1	-1	-1	-1	-1	-1	-1	-1	-1	-1	-1	-1	-1	-1	-1	0.418856
ABpraapaaaa	-1	-1	-1	-1	-1	0.706373	-1	-1	-1	-1	0.848754	-1	-1	-1	-1	-1	-1	-1	0.335187	-1	-1	-1	-1	0.689828	-1	-1	-1	-1	-1	-1	-1	-1	-1	-1	-1	-1	-1	-1	-1	-1	-1	-1	-1	-1	-1	-1	-1	-1	0.418856
ABplaapaaap	-1	-1	0	-1	0.685398	0.500433	-1	-1	-1	-1	0.914899	-1	-1	-1	-1	-1	-1	-1	0.35667	0.847043	-1	-1	-1	0.706052	-1	-1	-1	-1	-1	-1	-1	-1	-1	-1	-1	-1	0	-1	-1	-1	-1	-1	0.366204	-1	-1	-1	-1	-1	-1
ABpraapaaap	-1	-1	0	-1	0.685398	0.500433	-1	-1	-1	-1	0.914899	-1	-1	-1	-1	-1	-1	-1	0.35667	0.847043	-1	-1	-1	0.706052	-1	-1	-1	-1	-1	-1	-1	-1	-1	-1	-1	-1	0	-1	-1	-1	-1	-1	0.366204	-1	-1	-1	-1	-1	-1
ABalaaapall	-1	-1	0	-1	0.685398	0.500433	-1	-1	-1	-1	0.914899	-1	-1	-1	-1	-1	-1	-1	0.35667	0.847043	-1	-1	-1	0.706052	-1	-1	-1	-1	-1	-1	-1	-1	-1	-1	-1	-1	0	-1	-1	-1	-1	-1	0.366204	-1	-1	-1	-1	-1	-1
ABalaaapprr	-1	-1	0	-1	0.685398	0.500433	-1	-1	-1	-1	0.914899	-1	-1	-1	-1	-1	-1	-1	0.35667	0.847043	-1	-1	-1	0.706052	-1	-1	-1	-1	-1	-1	-1	-1	-1	-1	-1	-1	0	-1	-1	-1	-1	-1	0.366204	-1	-1	-1	-1	-1	-1
ABalppapapp	-1	-1	0	-1	0.685398	0.500433	-1	-1	-1	-1	0.914899	-1	-1	-1	-1	-1	-1	-1	0.35667	0.847043	-1	-1	-1	0.706052	-1	-1	-1	-1	-1	-1	-1	-1	-1	-1	-1	-1	0	-1	-1	-1	-1	-1	0.366204	-1	-1	-1	-1	-1	-1
ABarapppapp	-1	-1	0	-1	0.685398	0.500433	-1	-1	-1	-1	0.914899	-1	-1	-1	-1	-1	-1	-1	0.35667	0.847043	-1	-1	-1	0.706052	-1	-1	-1	-1	-1	-1	-1	-1	-1	-1	-1	-1	0	-1	-1	-1	-1	-1	0.366204	-1	-1	-1	-1	-1	-1
ABplaapaap	-1	-1	-1	-1	-1	0.560701	-1	-1	-1	-1	-1	-1	-1	-1	-1	-1	-1	-1	-1	-1	-1	-1	-1	0.637514	-1	-1	-1	-1	-1	-1	-1	-1	-1	-1	-1	-1	0.523961	-1	-1	-1	-1	-1	-1	-1	-1	-1	-1	-1	0.634274
ABpraapaap	-1	-1	-1	-1	-1	0.560701	-1	-1	-1	-1	-1	-1	-1	-1	-1	-1	-1	-1	-1	-1	-1	-1	-1	0.637514	-1	-1	-1	-1	-1	-1	-1	-1	-1	-1	-1	-1	0.523961	-1	-1	-1	-1	-1	-1	-1	-1	-1	-1	-1	0.634274
ABplaapaapa	0.625972	-1	-1	-1	-1	0.764284	-1	-1	-1	-1	-1	0.443629	-1	-1	-1	-1	-1	-1	0.46142	0.977168	-1	-1	-1	-1	-1	0.899978	-1	-1	-1	-1	-1	-1	-1	-1	-1	-1	0.602837	-1	-1	-1	-1	0.425044	-1	-1	-1	-1	-1	-1	0.604021
ABpraapaapa	0.625972	-1	-1	-1	-1	0.764284	-1	-1	-1	-1	-1	0.443629	-1	-1	-1	-1	-1	-1	0.46142	0.977168	-1	-1	-1	-1	-1	0.899978	-1	-1	-1	-1	-1	-1	-1	-1	-1	-1	0.602837	-1	-1	-1	-1	0.425044	-1	-1	-1	-1	-1	-1	0.604021
ABplaapaapp	-1	-1	0.570357	-1	-1	0.785116	-1	-1	-1	0.580798	1	-1	-1	-1	-1	-1	-1	-1	-1	-1	-1	-1	-1	0.837648	-1	-1	-1	-1	-1	-1	-1	-1	-1	-1	-1	-1	0.58539	-1	-1	-1	-1	0.408776	-1	-1	-1	-1	-1	-1	0.651219
ABpraapaapp	-1	-1	0.570357	-1	-1	0.785116	-1	-1	-1	0.580798	1	-1	-1	-1	-1	-1	-1	-1	-1	-1	-1	-1	-1	0.837648	-1	-1	-1	-1	-1	-1	-1	-1	-1	-1	-1	-1	0.58539	-1	-1	-1	-1	0.408776	-1	-1	-1	-1	-1	-1	0.651219
ABplaapap	-1	-1	0.708165	-1	-1	0.649357	-1	-1	-1	-1	-1	-1	-1	-1	-1	-1	-1	-1	-1	-1	-1	-1	-1	0.583364	-1	-1	-1	-1	-1	0.562703	-1	-1	-1	-1	-1	-1	0.439131	-1	-1	-1	-1	-1	-1	-1	-1	-1	-1	-1	0.619312
ABpraapap	-1	-1	0.708165	-1	-1	0.649357	-1	-1	-1	-1	-1	-1	-1	-1	-1	-1	-1	-1	-1	-1	-1	-1	-1	0.583364	-1	-1	-1	-1	-1	0.562703	-1	-1	-1	-1	-1	-1	0.439131	-1	-1	-1	-1	-1	-1	-1	-1	-1	-1	-1	0.619312
ABplaapapa	-1	-1	0.717264	-1	-1	0.570182	-1	-1	-1	-1	-1	-1	-1	-1	-1	-1	-1	-1	-1	-1	-1	-1	-1	0.668275	-1	0.639715	-1	-1	-1	0.667848	-1	0.605471	-1	-1	-1	-1	0.462376	-1	-1	-1	-1	-1	-1	-1	-1	-1	-1	-1	0.634764
ABpraapapa	-1	-1	0.717264	-1	-1	0.570182	-1	-1	-1	-1	-1	-1	-1	-1	-1	-1	-1	-1	-1	-1	-1	-1	-1	0.668275	-1	0.639715	-1	-1	-1	0.667848	-1	0.605471	-1	-1	-1	-1	0.462376	-1	-1	-1	-1	-1	-1	-1	-1	-1	-1	-1	0.634764
ABplaapapaa	0.613772	-1	0.706222	-1	0.78632	0.835111	-1	-1	-1	-1	0.686388	-1	-1	-1	-1	-1	-1	-1	-1	-1	-1	-1	-1	-1	-1	0.82502	-1	-1	-1	-1	-1	0.690413	-1	-1	0.566461	-1	0.710644	-1	-1	-1	-1	0	-1	-1	-1	-1	-1	-1	0.858293
ABpraapapaa	0.613772	-1	0.706222	-1	0.78632	0.835111	-1	-1	-1	-1	0.686388	-1	-1	-1	-1	-1	-1	-1	-1	-1	-1	-1	-1	-1	-1	0.82502	-1	-1	-1	-1	-1	0.690413	-1	-1	0.566461	-1	0.710644	-1	-1	-1	-1	0	-1	-1	-1	-1	-1	-1	0.858293
ABplaapapap	-1	0.564327	-1	-1	-1	0.857323	-1	-1	-1	-1	-1	-1	-1	-1	-1	-1	-1	-1	-1	-1	-1	-1	0.617323	-1	-1	0.915684	-1	-1	-1	0.83539	-1	-1	-1	-1	0.685247	-1	0.672277	-1	-1	-1	-1	-1	-1	-1	-1	-1	-1	-1	0.820893
ABpraapapap	-1	0.564327	-1	-1	-1	0.857323	-1	-1	-1	-1	-1	-1	-1	-1	-1	-1	-1	-1	-1	-1	-1	-1	0.617323	-1	-1	0.915684	-1	-1	-1	0.83539	-1	-1	-1	-1	0.685247	-1	0.672277	-1	-1	-1	-1	-1	-1	-1	-1	-1	-1	-1	0.820893
ABplaapapp	-1	-1	0.739613	-1	-1	0.625587	-1	-1	-1	-1	-1	-1	-1	-1	-1	-1	-1	-1	-1	-1	-1	-1	0.678506	0.716098	-1	-1	-1	-1	-1	0.701061	-1	-1	-1	-1	-1	-1	0.441379	-1	-1	-1	-1	0	-1	-1	-1	-1	-1	-1	0.663748
ABpraapapp	-1	-1	0.739613	-1	-1	0.625587	-1	-1	-1	-1	-1	-1	-1	-1	-1	-1	-1	-1	-1	-1	-1	-1	0.678506	0.716098	-1	-1	-1	-1	-1	0.701061	-1	-1	-1	-1	-1	-1	0.441379	-1	-1	-1	-1	0	-1	-1	-1	-1	-1	-1	0.663748
ABplaapappa	-1	-1	0.530707	-1	-1	-1	-1	-1	0.478677	-1	-1	-1	-1	-1	0.481402	-1	-1	-1	-1	-1	-1	-1	-1	-1	-1	1	-1	-1	-1	0.701895	-1	-1	-1	-1	-1	-1	0.553501	-1	-1	-1	-1	-1	0.735098	-1	-1	-1	-1	-1	0.727431
ABpraapappa	-1	-1	0.530707	-1	-1	-1	-1	-1	0.478677	-1	-1	-1	-1	-1	0.481402	-1	-1	-1	-1	-1	-1	-1	-1	-1	-1	1	-1	-1	-1	0.701895	-1	-1	-1	-1	-1	-1	0.553501	-1	-1	-1	-1	-1	0.735098	-1	-1	-1	-1	-1	0.727431
ABplaapappp	0.605472	-1	-1	-1	-1	0.688753	-1	-1	0.380277	-1	-1	-1	-1	-1	-1	-1	-1	-1	-1	-1	-1	-1	-1	0.689175	-1	0.759342	-1	-1	-1	0.791396	-1	-1	-1	-1	-1	-1	-1	-1	-1	-1	-1	0	-1	-1	-1	-1	-1	-1	0.662935
ABpraapappp	0.605472	-1	-1	-1	-1	0.688753	-1	-1	0.380277	-1	-1	-1	-1	-1	-1	-1	-1	-1	-1	-1	-1	-1	-1	0.689175	-1	0.759342	-1	-1	-1	0.791396	-1	-1	-1	-1	-1	-1	-1	-1	-1	-1	-1	0	-1	-1	-1	-1	-1	-1	0.662935
ABplaapapppa	-1	-1	0.730016	-1	-1	0.895925	-1	-1	0.428441	-1	-1	-1	-1	-1	-1	-1	-1	-1	-1	-1	-1	-1	0.717149	-1	-1	0.94381	-1	-1	-1	-1	-1	-1	-1	-1	-1	-1	0.646618	-1	-1	-1	-1	-1	-1	-1	-1	-1	-1	-1	0.888245
ABpraapapppa	-1	-1	0.730016	-1	-1	0.895925	-1	-1	0.428441	-1	-1	-1	-1	-1	-1	-1	-1	-1	-1	-1	-1	-1	0.717149	-1	-1	0.94381	-1	-1	-1	-1	-1	-1	-1	-1	-1	-1	0.646618	-1	-1	-1	-1	-1	-1	-1	-1	-1	-1	-1	0.888245
ABplaapp	0.631515	-1	0.783882	-1	-1	0.623823	-1	-1	0.664016	-1	-1	-1	-1	-1	-1	-1	-1	-1	-1	-1	-1	-1	0.735355	-1	-1	-1	-1	-1	-1	0	-1	-1	-1	-1	-1	-1	0.383805	-1	0.904266	-1	-1	-1	-1	0.7846	-1	-1	-1	-1	0.620756
ABpraapp	0.631515	-1	0.783882	-1	-1	0.623823	-1	-1	0.664016	-1	-1	-1	-1	-1	-1	-1	-1	-1	-1	-1	-1	-1	0.735355	-1	-1	-1	-1	-1	-1	0	-1	-1	-1	-1	-1	-1	0.383805	-1	0.904266	-1	-1	-1	-1	0.7846	-1	-1	-1	-1	0.620756
ABplaappa	-1	-1	0.723313	-1	-1	0.674726	-1	-1	-1	0.326535	-1	-1	-1	-1	-1	-1	-1	-1	-1	-1	-1	-1	0.67432	-1	-1	-1	-1	-1	-1	0.70947	-1	-1	-1	-1	-1	-1	-1	-1	0.92963	-1	-1	-1	-1	-1	-1	-1	-1	-1	0.607817
ABpraappa	-1	-1	0.723313	-1	-1	0.674726	-1	-1	-1	0.326535	-1	-1	-1	-1	-1	-1	-1	-1	-1	-1	-1	-1	0.67432	-1	-1	-1	-1	-1	-1	0.70947	-1	-1	-1	-1	-1	-1	-1	-1	0.92963	-1	-1	-1	-1	-1	-1	-1	-1	-1	0.607817
ABplaappaa	0.743671	-1	-1	-1	-1	0.726611	-1	-1	-1	-1	0.59108	-1	-1	-1	-1	-1	-1	-1	-1	-1	-1	-1	-1	-1	-1	-1	-1	-1	-1	-1	-1	-1	-1	-1	-1	-1	-1	-1	1	-1	0.938235	0.240811	-1	-1	-1	-1	-1	-1	0.545175
ABpraappaa	0.743671	-1	-1	-1	-1	0.726611	-1	-1	-1	-1	0.59108	-1	-1	-1	-1	-1	-1	-1	-1	-1	-1	-1	-1	-1	-1	-1	-1	-1	-1	-1	-1	-1	-1	-1	-1	-1	-1	-1	1	-1	0.938235	0.240811	-1	-1	-1	-1	-1	-1	0.545175
ABplaappap	0.707832	-1	-1	-1	-1	0.762518	-1	-1	-1	-1	0.640032	-1	-1	-1	-1	-1	-1	-1	-1	-1	-1	-1	-1	-1	0.409243	-1	-1	-1	-1	-1	-1	-1	-1	-1	-1	-1	-1	-1	1	-1	0.938901	-1	-1	-1	-1	-1	-1	-1	0.606722
ABpraappap	0.707832	-1	-1	-1	-1	0.762518	-1	-1	-1	-1	0.640032	-1	-1	-1	-1	-1	-1	-1	-1	-1	-1	-1	-1	-1	0.409243	-1	-1	-1	-1	-1	-1	-1	-1	-1	-1	-1	-1	-1	1	-1	0.938901	-1	-1	-1	-1	-1	-1	-1	0.606722
ABplaappp	-1	-1	0.744801	-1	-1	0.659307	-1	-1	-1	-1	-1	0.588965	-1	-1	-1	-1	-1	-1	-1	-1	-1	-1	-1	-1	-1	-1	-1	-1	-1	0.680486	-1	-1	-1	-1	-1	-1	0.420064	-1	1	-1	-1	-1	-1	-1	-1	-1	-1	-1	0.609152
ABpraappp	-1	-1	0.744801	-1	-1	0.659307	-1	-1	-1	-1	-1	0.588965	-1	-1	-1	-1	-1	-1	-1	-1	-1	-1	-1	-1	-1	-1	-1	-1	-1	0.680486	-1	-1	-1	-1	-1	-1	0.420064	-1	1	-1	-1	-1	-1	-1	-1	-1	-1	-1	0.609152
ABplaapppa	0.74838	-1	-1	-1	-1	0.769199	-1	-1	-1	-1	0.560837	-1	-1	-1	-1	-1	-1	-1	-1	-1	-1	-1	-1	-1	-1	-1	-1	-1	-1	-1	-1	-1	-1	-1	-1	-1	-1	-1	0.980664	-1	1	-1	-1	-1	-1	-1	-1	-1	0.573835
ABpraapppa	0.74838	-1	-1	-1	-1	0.769199	-1	-1	-1	-1	0.560837	-1	-1	-1	-1	-1	-1	-1	-1	-1	-1	-1	-1	-1	-1	-1	-1	-1	-1	-1	-1	-1	-1	-1	-1	-1	-1	-1	0.980664	-1	1	-1	-1	-1	-1	-1	-1	-1	0.573835
ABplaapppp	0.754066	-1	0.543042	-1	-1	0.76106	-1	-1	-1	-1	0.570724	0.678638	-1	-1	-1	-1	-1	-1	-1	-1	-1	-1	-1	-1	-1	-1	-1	-1	-1	-1	-1	-1	-1	-1	-1	-1	-1	-1	0.966361	-1	1	-1	-1	-1	-1	-1	-1	-1	0.565989
ABpraapppp	0.754066	-1	0.543042	-1	-1	0.76106	-1	-1	-1	-1	0.570724	0.678638	-1	-1	-1	-1	-1	-1	-1	-1	-1	-1	-1	-1	-1	-1	-1	-1	-1	-1	-1	-1	-1	-1	-1	-1	-1	-1	0.966361	-1	1	-1	-1	-1	-1	-1	-1	-1	0.565989
ABplapa	0.587404	-1	0.78562	-1	0.594013	0.615445	-1	-1	-1	-1	-1	0.687612	-1	-1	-1	-1	-1	-1	-1	-1	-1	-1	0.709129	0.606463	-1	-1	-1	-1	-1	0	-1	-1	-1	-1	-1	-1	0.380075	-1	0.68626	-1	-1	-1	-1	-1	-1	-1	-1	-1	0.627542
ABprapa	0.587404	-1	0.78562	-1	0.594013	0.615445	-1	-1	-1	-1	-1	0.687612	-1	-1	-1	-1	-1	-1	-1	-1	-1	-1	0.709129	0.606463	-1	-1	-1	-1	-1	0	-1	-1	-1	-1	-1	-1	0.380075	-1	0.68626	-1	-1	-1	-1	-1	-1	-1	-1	-1	0.627542
ABplapaa	-1	-1	0.720946	-1	-1	0.652368	-1	-1	-1	-1	-1	0.538842	-1	-1	-1	-1	-1	-1	0.484786	-1	-1	-1	-1	0.66278	-1	-1	-1	-1	-1	0	-1	-1	-1	-1	-1	-1	0	-1	0.806973	-1	-1	-1	-1	-1	-1	-1	-1	-1	0.562433
ABprapaa	-1	-1	0.720946	-1	-1	0.652368	-1	-1	-1	-1	-1	0.538842	-1	-1	-1	-1	-1	-1	0.484786	-1	-1	-1	-1	0.66278	-1	-1	-1	-1	-1	0	-1	-1	-1	-1	-1	-1	0	-1	0.806973	-1	-1	-1	-1	-1	-1	-1	-1	-1	0.562433
ABplapaaa	-1	-1	0.748622	-1	-1	-1	-1	-1	-1	-1	-1	-1	-1	-1	-1	-1	-1	-1	0.393713	0.812202	-1	-1	-1	0.621873	-1	-1	-1	-1	-1	0.456318	-1	-1	-1	-1	-1	-1	-1	-1	-1	-1	-1	0	-1	-1	-1	-1	-1	-1	0.620073
ABprapaaa	-1	-1	0.748622	-1	-1	-1	-1	-1	-1	-1	-1	-1	-1	-1	-1	-1	-1	-1	0.393713	0.812202	-1	-1	-1	0.621873	-1	-1	-1	-1	-1	0.456318	-1	-1	-1	-1	-1	-1	-1	-1	-1	-1	-1	0	-1	-1	-1	-1	-1	-1	0.620073
ABplapaaaa	-1	-1	-1	-1	-1	0.582811	-1	-1	-1	-1	-1	-1	-1	-1	-1	-1	-1	-1	-1	-1	-1	-1	0.63918	0.714925	-1	-1	-1	-1	-1	0.630055	-1	-1	-1	-1	-1	-1	-1	-1	-1	-1	-1	-1	-1	-1	-1	-1	-1	-1	0.626478
ABprapaaaa	-1	-1	-1	-1	-1	0.582811	-1	-1	-1	-1	-1	-1	-1	-1	-1	-1	-1	-1	-1	-1	-1	-1	0.63918	0.714925	-1	-1	-1	-1	-1	0.630055	-1	-1	-1	-1	-1	-1	-1	-1	-1	-1	-1	-1	-1	-1	-1	-1	-1	-1	0.626478
ABplapaaaap	-1	-1	-1	-1	-1	0.714039	-1	-1	-1	0.729493	-1	0.739805	-1	-1	-1	-1	-1	-1	-1	-1	-1	-1	-1	0.804258	-1	0.827102	-1	-1	-1	-1	-1	-1	-1	0.850252	-1	-1	0.528951	-1	-1	-1	-1	-1	-1	-1	-1	-1	-1	-1	0.627212
ABprapaaaap	-1	-1	-1	-1	-1	0.714039	-1	-1	-1	0.729493	-1	0.739805	-1	-1	-1	-1	-1	-1	-1	-1	-1	-1	-1	0.804258	-1	0.827102	-1	-1	-1	-1	-1	-1	-1	0.850252	-1	-1	0.528951	-1	-1	-1	-1	-1	-1	-1	-1	-1	-1	-1	0.627212
ABplapaaaapa	-1	-1	0.966011	-1	0.834363	0.871607	-1	-1	-1	0.89594	0.552867	0.823445	0.655782	-1	1	-1	-1	-1	0.556706	-1	-1	-1	0.65658	0.898981	-1	0.991823	-1	-1	-1	-1	-1	-1	-1	0.950436	-1	-1	0.674096	-1	-1	-1	-1	-1	-1	-1	-1	-1	-1	-1	0.825974
ABprapaaaapa	-1	-1	0.966011	-1	0.834363	0.871607	-1	-1	-1	0.89594	0.552867	0.823445	0.655782	-1	1	-1	-1	-1	0.556706	-1	-1	-1	0.65658	0.898981	-1	0.991823	-1	-1	-1	-1	-1	-1	-1	0.950436	-1	-1	0.674096	-1	-1	-1	-1	-1	-1	-1	-1	-1	-1	-1	0.825974
ABplapaaap	-1	-1	0.707222	-1	-1	0.611998	-1	-1	-1	-1	-1	-1	-1	-1	-1	-1	-1	-1	0.344799	-1	-1	-1	0.640242	0.697702	-1	-1	-1	-1	-1	0.640332	-1	-1	-1	-1	-1	-1	0	-1	-1	-1	-1	0	-1	-1	-1	-1	-1	-1	0.648502
ABprapaaap	-1	-1	0.707222	-1	-1	0.611998	-1	-1	-1	-1	-1	-1	-1	-1	-1	-1	-1	-1	0.344799	-1	-1	-1	0.640242	0.697702	-1	-1	-1	-1	-1	0.640332	-1	-1	-1	-1	-1	-1	0	-1	-1	-1	-1	0	-1	-1	-1	-1	-1	-1	0.648502
ABplapaaapa	-1	-1	0.616016	-1	-1	0.691375	-1	-1	-1	-1	-1	-1	-1	0	-1	-1	-1	-1	-1	-1	-1	-1	-1	0.77516	-1	0.861662	-1	-1	-1	-1	-1	-1	-1	0.930053	-1	-1	0.464663	-1	-1	-1	-1	-1	-1	-1	-1	-1	-1	-1	0.657237
ABprapaaapa	-1	-1	0.616016	-1	-1	0.691375	-1	-1	-1	-1	-1	-1	-1	0	-1	-1	-1	-1	-1	-1	-1	-1	-1	0.77516	-1	0.861662	-1	-1	-1	-1	-1	-1	-1	0.930053	-1	-1	0.464663	-1	-1	-1	-1	-1	-1	-1	-1	-1	-1	-1	0.657237
ABplapaaapad	-1	-1	-1	-1	-1	0.867367	-1	-1	-1	-1	-1	-1	-1	-1	-1	-1	-1	-1	-1	-1	-1	-1	-1	-1	-1	0.9961	-1	-1	-1	-1	-1	-1	-1	0.935132	-1	-1	0.617748	-1	-1	-1	0.584178	-1	-1	-1	-1	-1	-1	-1	-1
ABprapaaapad	-1	-1	-1	-1	-1	0.867367	-1	-1	-1	-1	-1	-1	-1	-1	-1	-1	-1	-1	-1	-1	-1	-1	-1	-1	-1	0.9961	-1	-1	-1	-1	-1	-1	-1	0.935132	-1	-1	0.617748	-1	-1	-1	0.584178	-1	-1	-1	-1	-1	-1	-1	-1
ABplapaaapav	-1	-1	-1	-1	-1	-1	-1	-1	-1	0.870282	-1	-1	-1	-1	-1	-1	-1	-1	-1	-1	-1	-1	-1	0.855019	-1	0.912112	-1	-1	-1	0.630494	-1	-1	-1	-1	-1	-1	0.664684	-1	-1	-1	-1	-1	-1	-1	-1	-1	-1	-1	-1
ABprapaaapav	-1	-1	-1	-1	-1	-1	-1	-1	-1	0.870282	-1	-1	-1	-1	-1	-1	-1	-1	-1	-1	-1	-1	-1	0.855019	-1	0.912112	-1	-1	-1	0.630494	-1	-1	-1	-1	-1	-1	0.664684	-1	-1	-1	-1	-1	-1	-1	-1	-1	-1	-1	-1
ABplapaap	-1	-1	0.724518	-1	-1	0.627341	-1	-1	0.542942	-1	-1	-1	-1	-1	-1	-1	-1	-1	-1	-1	-1	-1	-1	0.548245	-1	-1	-1	-1	-1	-1	-1	-1	-1	-1	-1	-1	0.441442	-1	0.836307	0.58432	-1	-1	-1	-1	-1	-1	-1	-1	0.567792
ABprapaap	-1	-1	0.724518	-1	-1	0.627341	-1	-1	0.542942	-1	-1	-1	-1	-1	-1	-1	-1	-1	-1	-1	-1	-1	-1	0.548245	-1	-1	-1	-1	-1	-1	-1	-1	-1	-1	-1	-1	0.441442	-1	0.836307	0.58432	-1	-1	-1	-1	-1	-1	-1	-1	0.567792
ABplapaapa	-1	-1	0.611195	-1	-1	0.716389	-1	0.4481	-1	-1	0	-1	-1	-1	-1	-1	-1	-1	-1	-1	-1	-1	-1	-1	-1	-1	-1	-1	-1	-1	-1	-1	-1	-1	-1	-1	0	-1	-1	-1	1	-1	-1	-1	-1	-1	-1	-1	0.631615
ABprapaapa	-1	-1	0.611195	-1	-1	0.716389	-1	0.4481	-1	-1	0	-1	-1	-1	-1	-1	-1	-1	-1	-1	-1	-1	-1	-1	-1	-1	-1	-1	-1	-1	-1	-1	-1	-1	-1	-1	0	-1	-1	-1	1	-1	-1	-1	-1	-1	-1	-1	0.631615
ABplapaapp	-1	-1	0.528822	-1	-1	0.791667	-1	-1	-1	-1	0	0.582194	-1	-1	-1	-1	-1	-1	-1	-1	-1	-1	-1	-1	-1	-1	-1	-1	-1	0.66445	-1	-1	-1	-1	-1	-1	-1	-1	0.942808	-1	1	-1	-1	-1	-1	-1	-1	-1	0.579761
ABprapaapp	-1	-1	0.528822	-1	-1	0.791667	-1	-1	-1	-1	0	0.582194	-1	-1	-1	-1	-1	-1	-1	-1	-1	-1	-1	-1	-1	-1	-1	-1	-1	0.66445	-1	-1	-1	-1	-1	-1	-1	-1	0.942808	-1	1	-1	-1	-1	-1	-1	-1	-1	0.579761
ABplapap	-1	-1	0.738466	-1	0.643286	0.598258	-1	-1	-1	-1	-1	0.56214	-1	-1	-1	-1	-1	-1	-1	-1	-1	-1	-1	-1	-1	-1	-1	-1	-1	0	-1	-1	-1	-1	-1	-1	0.472008	-1	0.833702	-1	-1	-1	0.542877	-1	-1	-1	-1	-1	0.587685
ABprapap	-1	-1	0.738466	-1	0.643286	0.598258	-1	-1	-1	-1	-1	0.56214	-1	-1	-1	-1	-1	-1	-1	-1	-1	-1	-1	-1	-1	-1	-1	-1	-1	0	-1	-1	-1	-1	-1	-1	0.472008	-1	0.833702	-1	-1	-1	0.542877	-1	-1	-1	-1	-1	0.587685
ABplapapa	-1	-1	0.728945	-1	0.667935	0.693944	-1	-1	-1	-1	-1	-1	-1	-1	-1	-1	-1	-1	-1	-1	-1	-1	-1	-1	-1	-1	-1	-1	-1	0.641467	-1	-1	-1	-1	-1	-1	0.479802	-1	0.986039	-1	-1	-1	-1	-1	-1	-1	-1	-1	0.655054
ABprapapa	-1	-1	0.728945	-1	0.667935	0.693944	-1	-1	-1	-1	-1	-1	-1	-1	-1	-1	-1	-1	-1	-1	-1	-1	-1	-1	-1	-1	-1	-1	-1	0.641467	-1	-1	-1	-1	-1	-1	0.479802	-1	0.986039	-1	-1	-1	-1	-1	-1	-1	-1	-1	0.655054
ABplapapaa	-1	-1	0.544905	-1	-1	0.807945	-1	-1	-1	-1	0	-1	-1	-1	-1	-1	-1	-1	-1	-1	-1	-1	-1	-1	-1	-1	-1	-1	-1	0.738511	-1	-1	-1	-1	-1	-1	-1	-1	1	-1	-1	-1	-1	-1	-1	-1	-1	-1	0.656737
ABprapapaa	-1	-1	0.544905	-1	-1	0.807945	-1	-1	-1	-1	0	-1	-1	-1	-1	-1	-1	-1	-1	-1	-1	-1	-1	-1	-1	-1	-1	-1	-1	0.738511	-1	-1	-1	-1	-1	-1	-1	-1	1	-1	-1	-1	-1	-1	-1	-1	-1	-1	0.656737
ABplapapap	-1	-1	0.575506	-1	-1	0.758646	-1	-1	-1	-1	0	-1	-1	-1	-1	-1	-1	-1	-1	-1	-1	-1	-1	-1	-1	-1	-1	-1	-1	-1	-1	-1	-1	-1	-1	-1	-1	-1	1	-1	-1	-1	-1	-1	-1	-1	-1	-1	0.558638
ABprapapap	-1	-1	0.575506	-1	-1	0.758646	-1	-1	-1	-1	0	-1	-1	-1	-1	-1	-1	-1	-1	-1	-1	-1	-1	-1	-1	-1	-1	-1	-1	-1	-1	-1	-1	-1	-1	-1	-1	-1	1	-1	-1	-1	-1	-1	-1	-1	-1	-1	0.558638
ABplapapp	-1	-1	0.687214	-1	0.635045	0.617772	-1	-1	-1	-1	-1	-1	-1	-1	-1	-1	-1	-1	-1	-1	-1	-1	-1	-1	-1	-1	-1	-1	-1	0.616142	-1	-1	-1	-1	-1	-1	-1	-1	0.900638	-1	-1	-1	0.570687	-1	-1	-1	-1	-1	0.627509
ABprapapp	-1	-1	0.687214	-1	0.635045	0.617772	-1	-1	-1	-1	-1	-1	-1	-1	-1	-1	-1	-1	-1	-1	-1	-1	-1	-1	-1	-1	-1	-1	-1	0.616142	-1	-1	-1	-1	-1	-1	-1	-1	0.900638	-1	-1	-1	0.570687	-1	-1	-1	-1	-1	0.627509
ABplapappa	-1	-1	0.572678	-1	-1	0.779088	-1	-1	-1	-1	0.51994	-1	-1	-1	-1	-1	-1	-1	-1	-1	-1	-1	-1	-1	-1	-1	-1	-1	-1	-1	-1	-1	-1	-1	-1	-1	-1	-1	0.957225	-1	1	-1	-1	-1	-1	-1	-1	-1	0.627522
ABprapappa	-1	-1	0.572678	-1	-1	0.779088	-1	-1	-1	-1	0.51994	-1	-1	-1	-1	-1	-1	-1	-1	-1	-1	-1	-1	-1	-1	-1	-1	-1	-1	-1	-1	-1	-1	-1	-1	-1	-1	-1	0.957225	-1	1	-1	-1	-1	-1	-1	-1	-1	0.627522
ABplapappp	-1	-1	0.470744	-1	-1	-1	-1	0.470202	-1	-1	-1	-1	-1	-1	-1	-1	-1	-1	-1	-1	-1	-1	0.616281	-1	-1	0.619957	-1	-1	-1	0.626854	-1	-1	-1	-1	-1	-1	0.0794023	-1	-1	-1	-1	-1	-1	-1	-1	-1	-1	-1	0.699438
ABprapappp	-1	-1	0.470744	-1	-1	-1	-1	0.470202	-1	-1	-1	-1	-1	-1	-1	-1	-1	-1	-1	-1	-1	-1	0.616281	-1	-1	0.619957	-1	-1	-1	0.626854	-1	-1	-1	-1	-1	-1	0.0794023	-1	-1	-1	-1	-1	-1	-1	-1	-1	-1	-1	0.699438
ABplapapppp	-1	-1	0.533162	-1	-1	0.607306	-1	0.573452	-1	-1	-1	-1	-1	-1	-1	-1	-1	-1	-1	-1	-1	-1	-1	-1	-1	0.783993	-1	-1	-1	0.521455	-1	-1	-1	-1	0.651707	-1	-1	-1	-1	-1	-1	-1	-1	-1	-1	-1	-1	-1	0.643999
ABprapapppp	-1	-1	0.533162	-1	-1	0.607306	-1	0.573452	-1	-1	-1	-1	-1	-1	-1	-1	-1	-1	-1	-1	-1	-1	-1	-1	-1	0.783993	-1	-1	-1	0.521455	-1	-1	-1	-1	0.651707	-1	-1	-1	-1	-1	-1	-1	-1	-1	-1	-1	-1	-1	0.643999
ABplapp	-1	-1	0.773966	-1	0.430687	0.505064	-1	-1	-1	-1	-1	0.653909	-1	-1	-1	-1	-1	-1	-1	-1	-1	-1	0.723262	-1	-1	-1	-1	-1	-1	0	-1	-1	-1	-1	-1	-1	0	-1	0.829494	-1	-1	-1	-1	0.700808	-1	-1	-1	-1	0.621135
ABprapp	-1	-1	0.773966	-1	0.430687	0.505064	-1	-1	-1	-1	-1	0.653909	-1	-1	-1	-1	-1	-1	-1	-1	-1	-1	0.723262	-1	-1	-1	-1	-1	-1	0	-1	-1	-1	-1	-1	-1	0	-1	0.829494	-1	-1	-1	-1	0.700808	-1	-1	-1	-1	0.621135
ABplappa	-1	-1	0.728795	-1	-1	0.669267	-1	-1	-1	-1	-1	0.704845	-1	-1	-1	-1	-1	-1	-1	-1	-1	-1	0.688209	-1	-1	-1	-1	-1	-1	0	-1	-1	-1	-1	-1	-1	-1	-1	0.900117	-1	-1	-1	-1	-1	-1	-1	-1	-1	0.607307
ABprappa	-1	-1	0.728795	-1	-1	0.669267	-1	-1	-1	-1	-1	0.704845	-1	-1	-1	-1	-1	-1	-1	-1	-1	-1	0.688209	-1	-1	-1	-1	-1	-1	0	-1	-1	-1	-1	-1	-1	-1	-1	0.900117	-1	-1	-1	-1	-1	-1	-1	-1	-1	0.607307
ABplappaa	-1	-1	0.675262	-1	-1	0.70642	-1	-1	-1	-1	-1	0.652803	-1	-1	-1	-1	-1	-1	-1	-1	-1	-1	-1	-1	-1	-1	-1	-1	-1	0.644633	-1	-1	-1	-1	-1	-1	-1	-1	0.978167	-1	0.966176	-1	-1	-1	-1	-1	-1	-1	0.644897
ABprappaa	-1	-1	0.675262	-1	-1	0.70642	-1	-1	-1	-1	-1	0.652803	-1	-1	-1	-1	-1	-1	-1	-1	-1	-1	-1	-1	-1	-1	-1	-1	-1	0.644633	-1	-1	-1	-1	-1	-1	-1	-1	0.978167	-1	0.966176	-1	-1	-1	-1	-1	-1	-1	0.644897
ABplappaaa	0.810638	-1	-1	-1	-1	0.753126	-1	-1	-1	-1	0	0.5268	-1	-1	-1	-1	-1	-1	-1	-1	-1	-1	-1	-1	-1	-1	-1	-1	-1	-1	-1	-1	-1	-1	-1	-1	-1	-1	0.952311	-1	1	-1	-1	-1	-1	-1	-1	-1	0.606056
ABprappaaa	0.810638	-1	-1	-1	-1	0.753126	-1	-1	-1	-1	0	0.5268	-1	-1	-1	-1	-1	-1	-1	-1	-1	-1	-1	-1	-1	-1	-1	-1	-1	-1	-1	-1	-1	-1	-1	-1	-1	-1	0.952311	-1	1	-1	-1	-1	-1	-1	-1	-1	0.606056
ABplappaap	-1	-1	0.586685	-1	-1	0.729479	-1	-1	-1	-1	0	0.44992	-1	-1	-1	-1	-1	-1	-1	-1	-1	-1	-1	-1	-1	-1	-1	-1	-1	-1	-1	-1	-1	-1	-1	-1	-1	-1	0.946561	-1	1	-1	-1	-1	-1	-1	-1	-1	0.576035
ABprappaap	-1	-1	0.586685	-1	-1	0.729479	-1	-1	-1	-1	0	0.44992	-1	-1	-1	-1	-1	-1	-1	-1	-1	-1	-1	-1	-1	-1	-1	-1	-1	-1	-1	-1	-1	-1	-1	-1	-1	-1	0.946561	-1	1	-1	-1	-1	-1	-1	-1	-1	0.576035
ABplappap	-1	-1	-1	-1	-1	0.682562	-1	-1	-1	-1	-1	0.50612	-1	-1	-1	-1	-1	-1	-1	-1	-1	-1	-1	-1	-1	-1	-1	-1	-1	0.673125	-1	-1	-1	-1	-1	-1	-1	-1	1	-1	-1	-1	-1	-1	-1	-1	-1	-1	0.638861
ABprappap	-1	-1	-1	-1	-1	0.682562	-1	-1	-1	-1	-1	0.50612	-1	-1	-1	-1	-1	-1	-1	-1	-1	-1	-1	-1	-1	-1	-1	-1	-1	0.673125	-1	-1	-1	-1	-1	-1	-1	-1	1	-1	-1	-1	-1	-1	-1	-1	-1	-1	0.638861
ABplappapa	-1	-1	-1	-1	-1	0.781885	-1	-1	-1	-1	0	0.456904	-1	-1	-1	-1	-1	-1	-1	-1	-1	-1	-1	-1	-1	-1	-1	-1	-1	-1	-1	-1	-1	-1	-1	-1	-1	-1	0.995456	-1	1	-1	-1	-1	-1	-1	-1	-1	0.636751
ABprappapa	-1	-1	-1	-1	-1	0.781885	-1	-1	-1	-1	0	0.456904	-1	-1	-1	-1	-1	-1	-1	-1	-1	-1	-1	-1	-1	-1	-1	-1	-1	-1	-1	-1	-1	-1	-1	-1	-1	-1	0.995456	-1	1	-1	-1	-1	-1	-1	-1	-1	0.636751
ABplappapp	-1	-1	-1	-1	-1	0.755652	-1	-1	-1	-1	0	0.310419	-1	-1	-1	-1	-1	-1	-1	-1	-1	-1	-1	-1	-1	-1	-1	-1	-1	-1	-1	-1	-1	-1	-1	-1	-1	-1	0.936139	-1	1	-1	-1	-1	-1	-1	-1	-1	0.553037
ABprappapp	-1	-1	-1	-1	-1	0.755652	-1	-1	-1	-1	0	0.310419	-1	-1	-1	-1	-1	-1	-1	-1	-1	-1	-1	-1	-1	-1	-1	-1	-1	-1	-1	-1	-1	-1	-1	-1	-1	-1	0.936139	-1	1	-1	-1	-1	-1	-1	-1	-1	0.553037
ABplappp	-1	-1	0.682591	-1	0.554912	-1	-1	-1	-1	-1	-1	-1	-1	-1	-1	-1	-1	-1	-1	-1	-1	-1	0.670315	0.561488	-1	-1	-1	-1	-1	0.425974	-1	-1	-1	-1	-1	-1	-1	-1	0.816	-1	-1	-1	-1	-1	-1	-1	-1	-1	0.623967
ABprappp	-1	-1	0.682591	-1	0.554912	-1	-1	-1	-1	-1	-1	-1	-1	-1	-1	-1	-1	-1	-1	-1	-1	-1	0.670315	0.561488	-1	-1	-1	-1	-1	0.425974	-1	-1	-1	-1	-1	-1	-1	-1	0.816	-1	-1	-1	-1	-1	-1	-1	-1	-1	0.623967
ABplapppa	-1	-1	0.692538	-1	-1	0.56152	-1	-1	-1	-1	-1	-1	0.3565	-1	-1	-1	-1	-1	0.376527	-1	-1	-1	-1	0.680635	-1	-1	-1	-1	-1	0.617552	-1	0.488539	-1	-1	-1	-1	-1	-1	-1	-1	-1	-1	-1	-1	-1	-1	-1	-1	0.672256
ABprapppa	-1	-1	0.692538	-1	-1	0.56152	-1	-1	-1	-1	-1	-1	0.3565	-1	-1	-1	-1	-1	0.376527	-1	-1	-1	-1	0.680635	-1	-1	-1	-1	-1	0.617552	-1	0.488539	-1	-1	-1	-1	-1	-1	-1	-1	-1	-1	-1	-1	-1	-1	-1	-1	0.672256
ABplapppaa	-1	-1	-1	-1	-1	-1	-1	-1	-1	-1	-1	-1	-1	-1	-1	-1	-1	-1	-1	-1	-1	-1	-1	0.77612	-1	0.715633	-1	-1	-1	-1	-1	0.592136	-1	0.964677	-1	-1	0.550613	-1	-1	-1	-1	-1	-1	-1	-1	-1	-1	-1	0.640402
ABprapppaa	-1	-1	-1	-1	-1	-1	-1	-1	-1	-1	-1	-1	-1	-1	-1	-1	-1	-1	-1	-1	-1	-1	-1	0.77612	-1	0.715633	-1	-1	-1	-1	-1	0.592136	-1	0.964677	-1	-1	0.550613	-1	-1	-1	-1	-1	-1	-1	-1	-1	-1	-1	0.640402
ABplapppaaa	-1	-1	-1	-1	-1	0.804511	-1	-1	-1	-1	-1	-1	-1	-1	-1	-1	-1	-1	-1	-1	-1	-1	-1	0.854161	-1	0.941072	0.631541	-1	-1	-1	-1	-1	-1	0.956978	-1	-1	0	-1	0.640903	-1	-1	-1	-1	-1	-1	-1	-1	-1	0.691168
ABprapppaaa	-1	-1	-1	-1	-1	0.804511	-1	-1	-1	-1	-1	-1	-1	-1	-1	-1	-1	-1	-1	-1	-1	-1	-1	0.854161	-1	0.941072	0.631541	-1	-1	-1	-1	-1	-1	0.956978	-1	-1	0	-1	0.640903	-1	-1	-1	-1	-1	-1	-1	-1	-1	0.691168
ABplapppap	-1	-1	0.695876	-1	-1	0.511167	-1	-1	-1	-1	-1	-1	-1	-1	-1	-1	-1	-1	0.398091	-1	-1	-1	-1	0.664743	-1	0.70414	-1	-1	-1	0.601603	-1	-1	-1	-1	-1	-1	-1	-1	-1	-1	-1	-1	-1	-1	-1	-1	-1	-1	0.652155
ABprapppap	-1	-1	0.695876	-1	-1	0.511167	-1	-1	-1	-1	-1	-1	-1	-1	-1	-1	-1	-1	0.398091	-1	-1	-1	-1	0.664743	-1	0.70414	-1	-1	-1	0.601603	-1	-1	-1	-1	-1	-1	-1	-1	-1	-1	-1	-1	-1	-1	-1	-1	-1	-1	0.652155
ABplapppapp	-1	-1	0.649903	-1	-1	0.598985	-1	-1	0.465489	-1	-1	-1	-1	-1	0.577978	-1	-1	-1	-1	-1	-1	-1	-1	0.633466	-1	0.748047	-1	-1	-1	-1	-1	-1	-1	-1	-1	-1	-1	-1	-1	-1	-1	0.376148	-1	-1	-1	-1	-1	-1	0.551162
ABprapppapp	-1	-1	0.649903	-1	-1	0.598985	-1	-1	0.465489	-1	-1	-1	-1	-1	0.577978	-1	-1	-1	-1	-1	-1	-1	-1	0.633466	-1	0.748047	-1	-1	-1	-1	-1	-1	-1	-1	-1	-1	-1	-1	-1	-1	-1	0.376148	-1	-1	-1	-1	-1	-1	0.551162
ABplapppappp	-1	-1	1	-1	-1	0.890466	0.695264	-1	0.788991	0.959268	-1	-1	0.956974	-1	0.859273	-1	-1	-1	-1	-1	-1	-1	0.682539	-1	-1	0.986496	-1	-1	-1	0.793829	-1	-1	-1	-1	0.945301	-1	0.700062	-1	-1	-1	-1	-1	-1	-1	-1	-1	-1	-1	-1
ABprapppappp	-1	-1	1	-1	-1	0.890466	0.695264	-1	0.788991	0.959268	-1	-1	0.956974	-1	0.859273	-1	-1	-1	-1	-1	-1	-1	0.682539	-1	-1	0.986496	-1	-1	-1	0.793829	-1	-1	-1	-1	0.945301	-1	0.700062	-1	-1	-1	-1	-1	-1	-1	-1	-1	-1	-1	-1
ABplapppp	-1	-1	0.699589	-1	-1	0.600771	-1	-1	-1	-1	-1	-1	-1	-1	-1	-1	-1	-1	-1	-1	-1	-1	0.699074	-1	-1	-1	-1	-1	-1	-1	-1	-1	-1	-1	-1	-1	0	-1	0.77069	0.543615	-1	-1	0.58353	-1	-1	-1	-1	-1	0.575892
ABprapppp	-1	-1	0.699589	-1	-1	0.600771	-1	-1	-1	-1	-1	-1	-1	-1	-1	-1	-1	-1	-1	-1	-1	-1	0.699074	-1	-1	-1	-1	-1	-1	-1	-1	-1	-1	-1	-1	-1	0	-1	0.77069	0.543615	-1	-1	0.58353	-1	-1	-1	-1	-1	0.575892
ABplappppa	0.827655	-1	-1	-1	-1	0.749927	-1	-1	-1	-1	0.610654	-1	-1	-1	-1	-1	-1	-1	-1	-1	-1	-1	-1	-1	-1	-1	-1	-1	-1	-1	-1	-1	-1	-1	-1	-1	-1	-1	0.963988	-1	1	-1	-1	-1	-1	-1	-1	-1	0.724857
ABprappppa	0.827655	-1	-1	-1	-1	0.749927	-1	-1	-1	-1	0.610654	-1	-1	-1	-1	-1	-1	-1	-1	-1	-1	-1	-1	-1	-1	-1	-1	-1	-1	-1	-1	-1	-1	-1	-1	-1	-1	-1	0.963988	-1	1	-1	-1	-1	-1	-1	-1	-1	0.724857
ABplappppp	-1	-1	0.598988	-1	-1	0.762223	-1	-1	0.508818	-1	0	-1	-1	-1	-1	-1	-1	-1	-1	-1	-1	-1	-1	-1	-1	-1	-1	-1	-1	-1	-1	-1	-1	-1	-1	-1	0	-1	1	-1	-1	-1	-1	-1	-1	-1	-1	-1	0.667483
ABprappppp	-1	-1	0.598988	-1	-1	0.762223	-1	-1	0.508818	-1	0	-1	-1	-1	-1	-1	-1	-1	-1	-1	-1	-1	-1	-1	-1	-1	-1	-1	-1	-1	-1	-1	-1	-1	-1	-1	0	-1	1	-1	-1	-1	-1	-1	-1	-1	-1	-1	0.667483
ABplaa	0.685748	-1	0.850371	-1	0.517181	-1	-1	-1	-1	-1	-1	0.692483	-1	0.559703	-1	-1	-1	-1	-1	-1	-1	-1	0.760671	0.639031	-1	-1	-1	-1	-1	0	-1	-1	-1	-1	-1	-1	0.549389	-1	0.524818	-1	-1	0	-1	0.73179	-1	-1	-1	-1	0.737377
ABplap	0.685748	-1	0.850371	-1	0.517181	-1	-1	-1	-1	-1	-1	0.692483	-1	0.559703	-1	-1	-1	-1	-1	-1	-1	-1	0.760671	0.639031	-1	-1	-1	-1	-1	0	-1	-1	-1	-1	-1	-1	0.549389	-1	0.524818	-1	-1	0	-1	0.73179	-1	-1	-1	-1	0.737377
ABpraa	0.685748	-1	0.850371	-1	0.517181	-1	-1	-1	-1	-1	-1	0.692483	-1	0.559703	-1	-1	-1	-1	-1	-1	-1	-1	0.760671	0.639031	-1	-1	-1	-1	-1	0	-1	-1	-1	-1	-1	-1	0.549389	-1	0.524818	-1	-1	0	-1	0.73179	-1	-1	-1	-1	0.737377
ABprap	0.685748	-1	0.850371	-1	0.517181	-1	-1	-1	-1	-1	-1	0.692483	-1	0.559703	-1	-1	-1	-1	-1	-1	-1	-1	0.760671	0.639031	-1	-1	-1	-1	-1	0	-1	-1	-1	-1	-1	-1	0.549389	-1	0.524818	-1	-1	0	-1	0.73179	-1	-1	-1	-1	0.737377
ABplp	0.690791	-1	0.820455	-1	0.492672	0.644131	-1	-1	-1	-1	-1	0.625413	-1	-1	-1	-1	-1	-1	-1	-1	-1	-1	0.78506	-1	-1	-1	-1	-1	-1	0	-1	-1	-1	-1	-1	-1	0.597267	-1	-1	-1	-1	-1	-1	0.7634	-1	-1	-1	-1	0.683571
ABprp	0.690791	-1	0.820455	-1	0.492672	0.644131	-1	-1	-1	-1	-1	0.625413	-1	-1	-1	-1	-1	-1	-1	-1	-1	-1	0.78506	-1	-1	-1	-1	-1	-1	0	-1	-1	-1	-1	-1	-1	0.597267	-1	-1	-1	-1	-1	-1	0.7634	-1	-1	-1	-1	0.683571
ABplpa	0.688834	-1	0.85636	-1	0.616969	-1	-1	-1	-1	-1	-1	-1	-1	-1	-1	-1	-1	-1	-1	-1	-1	0.570343	0.76185	0.721914	-1	-1	-1	-1	-1	0.4873	-1	-1	-1	0.765873	-1	-1	0.653447	-1	-1	-1	-1	-1	-1	-1	-1	-1	-1	-1	0.802881
ABprpa	0.688834	-1	0.85636	-1	0.616969	-1	-1	-1	-1	-1	-1	-1	-1	-1	-1	-1	-1	-1	-1	-1	-1	0.570343	0.76185	0.721914	-1	-1	-1	-1	-1	0.4873	-1	-1	-1	0.765873	-1	-1	0.653447	-1	-1	-1	-1	-1	-1	-1	-1	-1	-1	-1	0.802881
ABplpaa	-1	-1	-1	-1	0.528228	0.696464	-1	-1	-1	-1	-1	-1	-1	-1	-1	-1	-1	-1	-1	-1	-1	0.496322	0.714839	0.625116	-1	-1	-1	-1	-1	0.464611	-1	-1	-1	0.762478	-1	-1	-1	-1	-1	-1	-1	-1	0.63184	-1	-1	-1	-1	-1	0.704023
ABprpaa	-1	-1	-1	-1	0.528228	0.696464	-1	-1	-1	-1	-1	-1	-1	-1	-1	-1	-1	-1	-1	-1	-1	0.496322	0.714839	0.625116	-1	-1	-1	-1	-1	0.464611	-1	-1	-1	0.762478	-1	-1	-1	-1	-1	-1	-1	-1	0.63184	-1	-1	-1	-1	-1	0.704023
ABplpaaa	-1	-1	0.767844	-1	0.647688	0.746421	-1	-1	-1	-1	-1	-1	-1	-1	-1	-1	-1	-1	-1	-1	-1	-1	-1	0.595639	-1	-1	-1	-1	-1	0	-1	-1	-1	0.742296	-1	-1	-1	-1	-1	-1	-1	-1	-1	-1	-1	-1	-1	-1	0.622264
ABprpaaa	-1	-1	0.767844	-1	0.647688	0.746421	-1	-1	-1	-1	-1	-1	-1	-1	-1	-1	-1	-1	-1	-1	-1	-1	-1	0.595639	-1	-1	-1	-1	-1	0	-1	-1	-1	0.742296	-1	-1	-1	-1	-1	-1	-1	-1	-1	-1	-1	-1	-1	-1	0.622264
ABplpaaaa	-1	-1	0.76401	-1	-1	-1	0.289368	-1	-1	-1	-1	-1	-1	-1	-1	-1	-1	-1	-1	-1	-1	-1	0.674553	0.498276	-1	-1	-1	-1	-1	0.319368	-1	-1	-1	-1	-1	-1	-1	-1	-1	-1	-1	-1	-1	-1	-1	-1	-1	-1	0.645178
ABprpaaaa	-1	-1	0.76401	-1	-1	-1	0.289368	-1	-1	-1	-1	-1	-1	-1	-1	-1	-1	-1	-1	-1	-1	-1	0.674553	0.498276	-1	-1	-1	-1	-1	0.319368	-1	-1	-1	-1	-1	-1	-1	-1	-1	-1	-1	-1	-1	-1	-1	-1	-1	-1	0.645178
ABplpaaaaa	-1	-1	0.742881	-1	-1	0.624032	-1	-1	-1	-1	-1	-1	-1	-1	-1	-1	-1	-1	-1	-1	-1	-1	-1	0.618031	-1	0.659175	-1	-1	-1	-1	-1	0.497733	-1	-1	-1	-1	0.573255	-1	-1	-1	-1	-1	-1	-1	-1	-1	-1	-1	0.57511
ABprpaaaaa	-1	-1	0.742881	-1	-1	0.624032	-1	-1	-1	-1	-1	-1	-1	-1	-1	-1	-1	-1	-1	-1	-1	-1	-1	0.618031	-1	0.659175	-1	-1	-1	-1	-1	0.497733	-1	-1	-1	-1	0.573255	-1	-1	-1	-1	-1	-1	-1	-1	-1	-1	-1	0.57511
ABplpaaaaap	-1	-1	0.898389	-1	-1	0.945733	-1	-1	0.611147	-1	-1	-1	-1	0.634044	-1	-1	-1	-1	-1	-1	-1	0.992646	-1	-1	-1	0.953559	-1	-1	-1	-1	-1	-1	-1	-1	-1	-1	0.659718	-1	-1	-1	-1	-1	-1	-1	-1	-1	-1	-1	0.831303
ABprpaaaaap	-1	-1	0.898389	-1	-1	0.945733	-1	-1	0.611147	-1	-1	-1	-1	0.634044	-1	-1	-1	-1	-1	-1	-1	0.992646	-1	-1	-1	0.953559	-1	-1	-1	-1	-1	-1	-1	-1	-1	-1	0.659718	-1	-1	-1	-1	-1	-1	-1	-1	-1	-1	-1	0.831303
ABplpaaaap	-1	-1	-1	-1	-1	0.528448	-1	-1	-1	-1	-1	0.627777	-1	-1	-1	-1	-1	-1	-1	-1	-1	-1	-1	-1	-1	-1	-1	-1	0.855512	-1	-1	-1	-1	-1	-1	-1	0.464123	-1	-1	-1	-1	-1	-1	-1	-1	-1	-1	-1	0.603826
ABprpaaaap	-1	-1	-1	-1	-1	0.528448	-1	-1	-1	-1	-1	0.627777	-1	-1	-1	-1	-1	-1	-1	-1	-1	-1	-1	-1	-1	-1	-1	-1	0.855512	-1	-1	-1	-1	-1	-1	-1	0.464123	-1	-1	-1	-1	-1	-1	-1	-1	-1	-1	-1	0.603826
ABplpaaap	-1	-1	0.767956	-1	0.675631	0.642067	-1	-1	-1	-1	-1	-1	-1	-1	-1	-1	-1	-1	-1	-1	-1	-1	-1	0.62636	-1	-1	-1	-1	-1	0.61045	-1	-1	-1	0.795994	-1	-1	0.363724	-1	-1	-1	-1	-1	-1	-1	-1	-1	-1	-1	0.651858
ABprpaaap	-1	-1	0.767956	-1	0.675631	0.642067	-1	-1	-1	-1	-1	-1	-1	-1	-1	-1	-1	-1	-1	-1	-1	-1	-1	0.62636	-1	-1	-1	-1	-1	0.61045	-1	-1	-1	0.795994	-1	-1	0.363724	-1	-1	-1	-1	-1	-1	-1	-1	-1	-1	-1	0.651858
ABplpaaapa	-1	-1	-1	-1	-1	0.600503	-1	-1	-1	-1	-1	-1	-1	-1	-1	-1	-1	-1	0.461817	0.77309	-1	-1	-1	0.631744	-1	-1	-1	-1	-1	0.6382	-1	-1	-1	-1	-1	-1	-1	-1	-1	-1	-1	-1	-1	-1	-1	-1	-1	-1	0.645973
ABprpaaapa	-1	-1	-1	-1	-1	0.600503	-1	-1	-1	-1	-1	-1	-1	-1	-1	-1	-1	-1	0.461817	0.77309	-1	-1	-1	0.631744	-1	-1	-1	-1	-1	0.6382	-1	-1	-1	-1	-1	-1	-1	-1	-1	-1	-1	-1	-1	-1	-1	-1	-1	-1	0.645973
ABplpaap	0.558686	-1	0.753958	-1	0.598632	-1	-1	-1	-1	-1	-1	-1	0.474341	-1	-1	-1	-1	-1	-1	-1	-1	-1	0.666629	0.63845	-1	-1	-1	-1	-1	0.386427	-1	-1	-1	0.767641	-1	-1	0.502143	-1	-1	-1	-1	-1	-1	-1	-1	-1	-1	-1	0.58236
ABprpaap	0.558686	-1	0.753958	-1	0.598632	-1	-1	-1	-1	-1	-1	-1	0.474341	-1	-1	-1	-1	-1	-1	-1	-1	-1	0.666629	0.63845	-1	-1	-1	-1	-1	0.386427	-1	-1	-1	0.767641	-1	-1	0.502143	-1	-1	-1	-1	-1	-1	-1	-1	-1	-1	-1	0.58236
ABplpaapa	-1	-1	0.762592	-1	-1	0.627939	-1	-1	-1	-1	-1	-1	-1	-1	-1	-1	-1	-1	0.378634	0.719112	-1	0.538723	0.657339	0.612103	-1	-1	-1	-1	-1	0	-1	-1	-1	-1	-1	-1	0.392712	-1	-1	-1	-1	-1	-1	-1	-1	-1	-1	-1	0.636562
ABprpaapa	-1	-1	0.762592	-1	-1	0.627939	-1	-1	-1	-1	-1	-1	-1	-1	-1	-1	-1	-1	0.378634	0.719112	-1	0.538723	0.657339	0.612103	-1	-1	-1	-1	-1	0	-1	-1	-1	-1	-1	-1	0.392712	-1	-1	-1	-1	-1	-1	-1	-1	-1	-1	-1	0.636562
ABplpaapaa	-1	-1	0.738866	-1	-1	0.547661	-1	-1	-1	-1	-1	-1	-1	-1	-1	-1	-1	-1	0.366593	0.846435	-1	-1	-1	-1	-1	-1	-1	-1	-1	-1	-1	0.669108	-1	-1	-1	-1	0.605314	-1	-1	-1	-1	-1	-1	-1	-1	-1	-1	-1	0.584046
ABprpaapaa	-1	-1	0.738866	-1	-1	0.547661	-1	-1	-1	-1	-1	-1	-1	-1	-1	-1	-1	-1	0.366593	0.846435	-1	-1	-1	-1	-1	-1	-1	-1	-1	-1	-1	0.669108	-1	-1	-1	-1	0.605314	-1	-1	-1	-1	-1	-1	-1	-1	-1	-1	-1	0.584046
ABplpaapaaa	-1	-1	0.679777	-1	-1	0.798352	-1	-1	0.633473	-1	-1	0.644865	-1	-1	-1	-1	-1	0.740794	-1	-1	-1	-1	-1	-1	-1	0.928497	0.591915	-1	-1	-1	-1	-1	-1	0.967844	-1	-1	0.600103	-1	-1	-1	-1	0	-1	-1	-1	-1	-1	-1	0.711616
ABprpaapaaa	-1	-1	0.679777	-1	-1	0.798352	-1	-1	0.633473	-1	-1	0.644865	-1	-1	-1	-1	-1	0.740794	-1	-1	-1	-1	-1	-1	-1	0.928497	0.591915	-1	-1	-1	-1	-1	-1	0.967844	-1	-1	0.600103	-1	-1	-1	-1	0	-1	-1	-1	-1	-1	-1	0.711616
ABplpaapaap	-1	-1	0.661308	-1	-1	0.686152	-1	-1	0.566404	-1	-1	-1	-1	0	-1	-1	-1	-1	0.579775	1	-1	-1	-1	-1	-1	0.94179	-1	-1	-1	-1	-1	-1	-1	-1	-1	-1	0.545299	-1	-1	-1	-1	-1	-1	-1	-1	0.739318	-1	-1	0.595305
ABprpaapaap	-1	-1	0.661308	-1	-1	0.686152	-1	-1	0.566404	-1	-1	-1	-1	0	-1	-1	-1	-1	0.579775	1	-1	-1	-1	-1	-1	0.94179	-1	-1	-1	-1	-1	-1	-1	-1	-1	-1	0.545299	-1	-1	-1	-1	-1	-1	-1	-1	0.739318	-1	-1	0.595305
ABplpaapap	0.610165	-1	0.796688	-1	-1	0.549082	-1	-1	-1	-1	-1	-1	-1	-1	-1	-1	-1	-1	-1	-1	-1	-1	0.643877	0.720711	-1	-1	-1	-1	-1	-1	-1	-1	-1	-1	-1	-1	0.422073	-1	-1	-1	-1	-1	-1	-1	-1	-1	-1	-1	0.536987
ABprpaapap	0.610165	-1	0.796688	-1	-1	0.549082	-1	-1	-1	-1	-1	-1	-1	-1	-1	-1	-1	-1	-1	-1	-1	-1	0.643877	0.720711	-1	-1	-1	-1	-1	-1	-1	-1	-1	-1	-1	-1	0.422073	-1	-1	-1	-1	-1	-1	-1	-1	-1	-1	-1	0.536987
ABplpaapapa	-1	-1	0.67968	-1	-1	0.757642	-1	-1	-1	0.642032	0.924552	-1	-1	-1	-1	-1	-1	-1	-1	-1	-1	-1	-1	0.818768	-1	-1	-1	-1	-1	0.697889	-1	-1	-1	-1	-1	-1	0.69522	-1	-1	-1	-1	-1	0.533166	-1	-1	-1	-1	-1	0.575457
ABprpaapapa	-1	-1	0.67968	-1	-1	0.757642	-1	-1	-1	0.642032	0.924552	-1	-1	-1	-1	-1	-1	-1	-1	-1	-1	-1	-1	0.818768	-1	-1	-1	-1	-1	0.697889	-1	-1	-1	-1	-1	-1	0.69522	-1	-1	-1	-1	-1	0.533166	-1	-1	-1	-1	-1	0.575457
ABplpaapp	-1	-1	0.783801	-1	0.691684	0.48671	-1	-1	-1	-1	-1	-1	-1	-1	-1	-1	-1	-1	-1	-1	-1	-1	-1	0.611978	0.439838	-1	-1	-1	-1	0.64327	-1	-1	-1	-1	-1	-1	0.447774	-1	-1	-1	-1	-1	-1	-1	-1	-1	-1	-1	0.657375
ABprpaapp	-1	-1	0.783801	-1	0.691684	0.48671	-1	-1	-1	-1	-1	-1	-1	-1	-1	-1	-1	-1	-1	-1	-1	-1	-1	0.611978	0.439838	-1	-1	-1	-1	0.64327	-1	-1	-1	-1	-1	-1	0.447774	-1	-1	-1	-1	-1	-1	-1	-1	-1	-1	-1	0.657375
ABplpaappa	-1	-1	0.723303	-1	-1	0.552097	-1	-1	-1	-1	-1	-1	-1	-1	-1	-1	-1	-1	-1	-1	-1	-1	0.656139	-1	-1	0.546588	-1	-1	-1	0.645148	-1	0.590891	-1	-1	0.39729	-1	0.509957	-1	-1	-1	-1	-1	-1	-1	-1	-1	-1	-1	0.625163
ABprpaappa	-1	-1	0.723303	-1	-1	0.552097	-1	-1	-1	-1	-1	-1	-1	-1	-1	-1	-1	-1	-1	-1	-1	-1	0.656139	-1	-1	0.546588	-1	-1	-1	0.645148	-1	0.590891	-1	-1	0.39729	-1	0.509957	-1	-1	-1	-1	-1	-1	-1	-1	-1	-1	-1	0.625163
ABplpaappaa	-1	-1	0.927174	-1	-1	0.84956	0.548581	-1	0.489349	-1	-1	-1	-1	-1	-1	-1	-1	-1	-1	-1	-1	-1	-1	-1	-1	0.838856	-1	-1	-1	0.802802	-1	0.923815	-1	-1	0.597008	-1	0.693394	-1	-1	-1	-1	-1	-1	-1	-1	-1	-1	-1	0.844362
ABprpaappaa	-1	-1	0.927174	-1	-1	0.84956	0.548581	-1	0.489349	-1	-1	-1	-1	-1	-1	-1	-1	-1	-1	-1	-1	-1	-1	-1	-1	0.838856	-1	-1	-1	0.802802	-1	0.923815	-1	-1	0.597008	-1	0.693394	-1	-1	-1	-1	-1	-1	-1	-1	-1	-1	-1	0.844362
ABplpaappap	-1	-1	0.692021	-1	-1	0.740917	0.701157	-1	-1	-1	-1	-1	-1	-1	-1	-1	-1	-1	-1	-1	-1	-1	0.738197	-1	0.588111	0.98549	-1	-1	1	-1	-1	-1	-1	-1	-1	-1	0.739756	-1	-1	0.638526	-1	-1	-1	-1	-1	-1	-1	-1	0.773487
ABprpaappap	-1	-1	0.692021	-1	-1	0.740917	0.701157	-1	-1	-1	-1	-1	-1	-1	-1	-1	-1	-1	-1	-1	-1	-1	0.738197	-1	0.588111	0.98549	-1	-1	1	-1	-1	-1	-1	-1	-1	-1	0.739756	-1	-1	0.638526	-1	-1	-1	-1	-1	-1	-1	-1	0.773487
ABplpaappp	0.632295	-1	0.734663	-1	-1	0.618441	-1	-1	0.50753	-1	-1	-1	-1	-1	-1	-1	-1	-1	-1	0.708575	-1	-1	-1	0.728909	0.507028	0.717403	-1	-1	-1	0.549359	-1	-1	-1	0.848285	-1	-1	-1	-1	-1	-1	-1	-1	-1	-1	-1	-1	-1	-1	0.609435
ABprpaappp	0.632295	-1	0.734663	-1	-1	0.618441	-1	-1	0.50753	-1	-1	-1	-1	-1	-1	-1	-1	-1	-1	0.708575	-1	-1	-1	0.728909	0.507028	0.717403	-1	-1	-1	0.549359	-1	-1	-1	0.848285	-1	-1	-1	-1	-1	-1	-1	-1	-1	-1	-1	-1	-1	-1	0.609435
ABplpaapppa	-1	-1	-1	-1	-1	0.805907	-1	-1	-1	-1	-1	-1	-1	-1	-1	-1	-1	-1	-1	-1	-1	-1	0.78363	-1	-1	0.955033	-1	-1	-1	0.850041	-1	-1	-1	-1	-1	-1	-1	-1	-1	0.726453	-1	-1	-1	-1	-1	-1	-1	-1	0.75794
ABprpaapppa	-1	-1	-1	-1	-1	0.805907	-1	-1	-1	-1	-1	-1	-1	-1	-1	-1	-1	-1	-1	-1	-1	-1	0.78363	-1	-1	0.955033	-1	-1	-1	0.850041	-1	-1	-1	-1	-1	-1	-1	-1	-1	0.726453	-1	-1	-1	-1	-1	-1	-1	-1	0.75794
ABplpap	-1	-1	0.773673	-1	0.507626	-1	-1	-1	-1	-1	-1	-1	-1	-1	-1	-1	-1	-1	-1	-1	-1	0.560481	0.709993	-1	-1	-1	-1	-1	-1	0	-1	-1	-1	-1	-1	-1	0.556414	-1	-1	-1	-1	-1	-1	0.671661	-1	-1	-1	-1	0.628595
ABprpap	-1	-1	0.773673	-1	0.507626	-1	-1	-1	-1	-1	-1	-1	-1	-1	-1	-1	-1	-1	-1	-1	-1	0.560481	0.709993	-1	-1	-1	-1	-1	-1	0	-1	-1	-1	-1	-1	-1	0.556414	-1	-1	-1	-1	-1	-1	0.671661	-1	-1	-1	-1	0.628595
ABplpapa	-1	-1	0.763977	-1	0.679119	0.685807	-1	-1	-1	-1	-1	-1	-1	-1	-1	-1	-1	-1	-1	-1	-1	-1	-1	0.571233	-1	-1	-1	-1	-1	0.235157	-1	-1	-1	-1	-1	-1	0.536288	-1	-1	-1	-1	-1	-1	-1	-1	-1	-1	-1	0.652683
ABprpapa	-1	-1	0.763977	-1	0.679119	0.685807	-1	-1	-1	-1	-1	-1	-1	-1	-1	-1	-1	-1	-1	-1	-1	-1	-1	0.571233	-1	-1	-1	-1	-1	0.235157	-1	-1	-1	-1	-1	-1	0.536288	-1	-1	-1	-1	-1	-1	-1	-1	-1	-1	-1	0.652683
ABplpapaa	-1	-1	0.735722	-1	-1	0.56257	-1	-1	-1	-1	0.504421	-1	-1	-1	-1	-1	-1	-1	-1	-1	-1	-1	-1	-1	-1	-1	-1	-1	-1	0.475392	-1	-1	-1	-1	-1	-1	0.454228	-1	-1	-1	-1	-1	-1	-1	-1	-1	-1	0.577497	0.585336
ABprpapaa	-1	-1	0.735722	-1	-1	0.56257	-1	-1	-1	-1	0.504421	-1	-1	-1	-1	-1	-1	-1	-1	-1	-1	-1	-1	-1	-1	-1	-1	-1	-1	0.475392	-1	-1	-1	-1	-1	-1	0.454228	-1	-1	-1	-1	-1	-1	-1	-1	-1	-1	0.577497	0.585336
ABplpapaaa	-1	-1	0.671064	-1	-1	0.641237	-1	-1	-1	-1	-1	-1	-1	-1	0.730138	-1	-1	-1	-1	-1	-1	-1	-1	-1	-1	0.546178	-1	-1	-1	0.581221	-1	0.523519	-1	-1	-1	-1	0	-1	-1	-1	-1	-1	-1	-1	-1	-1	-1	-1	0.614275
ABprpapaaa	-1	-1	0.671064	-1	-1	0.641237	-1	-1	-1	-1	-1	-1	-1	-1	0.730138	-1	-1	-1	-1	-1	-1	-1	-1	-1	-1	0.546178	-1	-1	-1	0.581221	-1	0.523519	-1	-1	-1	-1	0	-1	-1	-1	-1	-1	-1	-1	-1	-1	-1	-1	0.614275
ABplpapaaap	-1	-1	-1	-1	-1	0.726278	-1	-1	-1	0.656731	0.72333	-1	-1	-1	-1	-1	-1	-1	-1	-1	-1	-1	0.663261	-1	-1	0.994352	-1	-1	-1	-1	-1	-1	-1	-1	-1	-1	-1	-1	-1	-1	0.477879	-1	-1	-1	-1	0.725421	-1	-1	0.585299
ABprpapaaap	-1	-1	-1	-1	-1	0.726278	-1	-1	-1	0.656731	0.72333	-1	-1	-1	-1	-1	-1	-1	-1	-1	-1	-1	0.663261	-1	-1	0.994352	-1	-1	-1	-1	-1	-1	-1	-1	-1	-1	-1	-1	-1	-1	0.477879	-1	-1	-1	-1	0.725421	-1	-1	0.585299
ABplpapaap	-1	-1	0.722434	-1	-1	0.601267	-1	-1	-1	-1	-1	-1	-1	-1	-1	-1	-1	-1	0.314537	-1	-1	-1	0.64885	-1	-1	0.504458	-1	-1	-1	0.664029	-1	-1	-1	-1	-1	-1	0	-1	-1	-1	-1	-1	-1	-1	-1	-1	-1	-1	0.598849
ABprpapaap	-1	-1	0.722434	-1	-1	0.601267	-1	-1	-1	-1	-1	-1	-1	-1	-1	-1	-1	-1	0.314537	-1	-1	-1	0.64885	-1	-1	0.504458	-1	-1	-1	0.664029	-1	-1	-1	-1	-1	-1	0	-1	-1	-1	-1	-1	-1	-1	-1	-1	-1	-1	0.598849
ABplpapaapa	-1	-1	-1	-1	-1	0.757847	-1	-1	-1	-1	-1	-1	-1	0.595633	-1	-1	-1	1	-1	-1	-1	-1	-1	-1	-1	0.902084	-1	-1	-1	-1	-1	-1	-1	-1	-1	-1	0.58912	-1	-1	-1	-1	-1	-1	-1	-1	-1	-1	-1	0.705666
ABprpapaapa	-1	-1	-1	-1	-1	0.757847	-1	-1	-1	-1	-1	-1	-1	0.595633	-1	-1	-1	1	-1	-1	-1	-1	-1	-1	-1	0.902084	-1	-1	-1	-1	-1	-1	-1	-1	-1	-1	0.58912	-1	-1	-1	-1	-1	-1	-1	-1	-1	-1	-1	0.705666
ABplpapappa	-1	-1	-1	-1	-1	0.757847	-1	-1	-1	-1	-1	-1	-1	0.595633	-1	-1	-1	1	-1	-1	-1	-1	-1	-1	-1	0.902084	-1	-1	-1	-1	-1	-1	-1	-1	-1	-1	0.58912	-1	-1	-1	-1	-1	-1	-1	-1	-1	-1	-1	0.705666
ABprpapappa	-1	-1	-1	-1	-1	0.757847	-1	-1	-1	-1	-1	-1	-1	0.595633	-1	-1	-1	1	-1	-1	-1	-1	-1	-1	-1	0.902084	-1	-1	-1	-1	-1	-1	-1	-1	-1	-1	0.58912	-1	-1	-1	-1	-1	-1	-1	-1	-1	-1	-1	0.705666
ABplpapaapp	-1	-1	-1	-1	-1	-1	-1	-1	0.636386	-1	-1	-1	-1	-1	-1	-1	-1	0.837003	-1	-1	-1	-1	-1	-1	-1	0.948199	0.654282	-1	-1	-1	-1	-1	-1	-1	-1	-1	0.619233	-1	-1	-1	0	0	0.566795	-1	-1	0.809893	-1	-1	0.598946
ABprpapaapp	-1	-1	-1	-1	-1	-1	-1	-1	0.636386	-1	-1	-1	-1	-1	-1	-1	-1	0.837003	-1	-1	-1	-1	-1	-1	-1	0.948199	0.654282	-1	-1	-1	-1	-1	-1	-1	-1	-1	0.619233	-1	-1	-1	0	0	0.566795	-1	-1	0.809893	-1	-1	0.598946
ABplppaaaaa	-1	-1	-1	-1	-1	-1	-1	-1	0.636386	-1	-1	-1	-1	-1	-1	-1	-1	0.837003	-1	-1	-1	-1	-1	-1	-1	0.948199	0.654282	-1	-1	-1	-1	-1	-1	-1	-1	-1	0.619233	-1	-1	-1	0	0	0.566795	-1	-1	0.809893	-1	-1	0.598946
ABprppaaaaa	-1	-1	-1	-1	-1	-1	-1	-1	0.636386	-1	-1	-1	-1	-1	-1	-1	-1	0.837003	-1	-1	-1	-1	-1	-1	-1	0.948199	0.654282	-1	-1	-1	-1	-1	-1	-1	-1	-1	0.619233	-1	-1	-1	0	0	0.566795	-1	-1	0.809893	-1	-1	0.598946
ABplpapap	-1	-1	0.748859	-1	-1	0.640128	-1	-1	-1	-1	-1	-1	-1	-1	-1	-1	-1	-1	-1	-1	-1	0.536821	-1	-1	-1	-1	-1	-1	-1	0.586043	-1	-1	-1	-1	-1	-1	0.47955	-1	-1	-1	-1	-1	-1	-1	-1	-1	-1	-1	0.594158
ABprpapap	-1	-1	0.748859	-1	-1	0.640128	-1	-1	-1	-1	-1	-1	-1	-1	-1	-1	-1	-1	-1	-1	-1	0.536821	-1	-1	-1	-1	-1	-1	-1	0.586043	-1	-1	-1	-1	-1	-1	0.47955	-1	-1	-1	-1	-1	-1	-1	-1	-1	-1	-1	0.594158
ABplpapapa	-1	-1	0.728822	-1	-1	0.5608	-1	-1	-1	-1	-1	-1	-1	-1	-1	-1	-1	-1	0.395133	-1	-1	-1	-1	-1	-1	0.603225	-1	-1	0.579084	0.626069	-1	0.539705	-1	-1	-1	-1	0.440891	-1	-1	-1	-1	-1	-1	-1	-1	-1	-1	0.679634	0.617935
ABprpapapa	-1	-1	0.728822	-1	-1	0.5608	-1	-1	-1	-1	-1	-1	-1	-1	-1	-1	-1	-1	0.395133	-1	-1	-1	-1	-1	-1	0.603225	-1	-1	0.579084	0.626069	-1	0.539705	-1	-1	-1	-1	0.440891	-1	-1	-1	-1	-1	-1	-1	-1	-1	-1	0.679634	0.617935
ABplpapapaa	-1	-1	-1	-1	-1	0.8394	-1	-1	-1	-1	-1	-1	-1	-1	-1	-1	-1	-1	0.555271	-1	-1	-1	0.628814	-1	-1	0.942081	-1	-1	-1	-1	-1	-1	-1	-1	-1	-1	0.578569	-1	-1	-1	-1	0.475713	-1	-1	-1	-1	-1	-1	0.597248
ABprpapapaa	-1	-1	-1	-1	-1	0.8394	-1	-1	-1	-1	-1	-1	-1	-1	-1	-1	-1	-1	0.555271	-1	-1	-1	0.628814	-1	-1	0.942081	-1	-1	-1	-1	-1	-1	-1	-1	-1	-1	0.578569	-1	-1	-1	-1	0.475713	-1	-1	-1	-1	-1	-1	0.597248
ABplpapapap	-1	-1	-1	-1	-1	0.682771	-1	-1	0.513269	-1	-1	-1	-1	-1	-1	-1	-1	-1	0.529461	-1	-1	-1	-1	-1	-1	1	-1	-1	-1	-1	-1	-1	-1	-1	-1	-1	0	-1	-1	-1	-1	-1	-1	-1	-1	0.684031	-1	-1	0.693599
ABprpapapap	-1	-1	-1	-1	-1	0.682771	-1	-1	0.513269	-1	-1	-1	-1	-1	-1	-1	-1	-1	0.529461	-1	-1	-1	-1	-1	-1	1	-1	-1	-1	-1	-1	-1	-1	-1	-1	-1	0	-1	-1	-1	-1	-1	-1	-1	-1	0.684031	-1	-1	0.693599
ABplpapapp	-1	-1	0.740318	-1	-1	0.571703	-1	-1	-1	-1	-1	-1	-1	-1	-1	-1	-1	-1	-1	-1	-1	0.707819	-1	-1	-1	-1	-1	-1	0.870794	0.604098	-1	-1	-1	-1	0.396629	-1	-1	-1	-1	-1	-1	-1	-1	-1	0.650551	-1	-1	-1	0.610182
ABprpapapp	-1	-1	0.740318	-1	-1	0.571703	-1	-1	-1	-1	-1	-1	-1	-1	-1	-1	-1	-1	-1	-1	-1	0.707819	-1	-1	-1	-1	-1	-1	0.870794	0.604098	-1	-1	-1	-1	0.396629	-1	-1	-1	-1	-1	-1	-1	-1	-1	0.650551	-1	-1	-1	0.610182
ABplpp	0.670769	-1	0.807851	-1	0.606953	-1	-1	-1	-1	-1	-1	0.719971	-1	-1	-1	-1	-1	-1	-1	-1	-1	0.558995	-1	-1	-1	-1	-1	-1	-1	0	-1	-1	-1	-1	-1	-1	0.526103	-1	-1	-1	-1	-1	-1	0.68488	-1	-1	-1	-1	0.729929
ABprpp	0.670769	-1	0.807851	-1	0.606953	-1	-1	-1	-1	-1	-1	0.719971	-1	-1	-1	-1	-1	-1	-1	-1	-1	0.558995	-1	-1	-1	-1	-1	-1	-1	0	-1	-1	-1	-1	-1	-1	0.526103	-1	-1	-1	-1	-1	-1	0.68488	-1	-1	-1	-1	0.729929
ABplppa	-1	-1	0.776089	-1	0.670023	-1	-1	-1	-1	-1	-1	0.54966	-1	-1	-1	-1	-1	-1	-1	-1	-1	0.558687	-1	-1	-1	-1	-1	-1	-1	0	-1	-1	-1	0.750721	-1	-1	0.50718	-1	-1	-1	-1	-1	-1	-1	-1	-1	-1	-1	0.635859
ABprppa	-1	-1	0.776089	-1	0.670023	-1	-1	-1	-1	-1	-1	0.54966	-1	-1	-1	-1	-1	-1	-1	-1	-1	0.558687	-1	-1	-1	-1	-1	-1	-1	0	-1	-1	-1	0.750721	-1	-1	0.50718	-1	-1	-1	-1	-1	-1	-1	-1	-1	-1	-1	0.635859
ABplppaa	-1	-1	0.765178	-1	-1	-1	-1	-1	-1	-1	-1	-1	-1	-1	-1	-1	-1	-1	-1	-1	-1	-1	-1	-1	-1	-1	-1	-1	-1	0.440617	-1	-1	-1	-1	-1	-1	0.449963	-1	-1	-1	-1	-1	-1	0.697173	-1	-1	-1	-1	0.609349
ABprppaa	-1	-1	0.765178	-1	-1	-1	-1	-1	-1	-1	-1	-1	-1	-1	-1	-1	-1	-1	-1	-1	-1	-1	-1	-1	-1	-1	-1	-1	-1	0.440617	-1	-1	-1	-1	-1	-1	0.449963	-1	-1	-1	-1	-1	-1	0.697173	-1	-1	-1	-1	0.609349
ABplppaaa	-1	-1	0.737765	-1	-1	0.569439	-1	-1	-1	-1	-1	-1	-1	-1	-1	-1	-1	-1	-1	-1	-1	-1	-1	-1	-1	-1	-1	-1	-1	-1	-1	-1	-1	-1	-1	-1	0.490608	-1	-1	-1	-1	-1	0.631244	-1	-1	-1	-1	0.714631	0.612591
ABprppaaa	-1	-1	0.737765	-1	-1	0.569439	-1	-1	-1	-1	-1	-1	-1	-1	-1	-1	-1	-1	-1	-1	-1	-1	-1	-1	-1	-1	-1	-1	-1	-1	-1	-1	-1	-1	-1	-1	0.490608	-1	-1	-1	-1	-1	0.631244	-1	-1	-1	-1	0.714631	0.612591
ABplppaaaa	-1	-1	0.696757	-1	-1	0.564338	-1	-1	-1	-1	-1	-1	-1	-1	-1	-1	-1	-1	-1	-1	-1	-1	0.68381	-1	-1	0.585357	-1	-1	-1	-1	-1	-1	-1	-1	-1	-1	0.410871	-1	-1	-1	-1	-1	-1	-1	-1	0.629434	-1	-1	0.655515
ABprppaaaa	-1	-1	0.696757	-1	-1	0.564338	-1	-1	-1	-1	-1	-1	-1	-1	-1	-1	-1	-1	-1	-1	-1	-1	0.68381	-1	-1	0.585357	-1	-1	-1	-1	-1	-1	-1	-1	-1	-1	0.410871	-1	-1	-1	-1	-1	-1	-1	-1	0.629434	-1	-1	0.655515
ABplppaaaap	-1	-1	0.601012	-1	-1	0.625022	-1	-1	-1	-1	-1	-1	-1	-1	-1	-1	-1	-1	-1	-1	-1	-1	-1	-1	-1	0.710804	-1	-1	-1	0.549805	-1	-1	-1	-1	-1	-1	0.513769	-1	-1	-1	-1	0	-1	-1	-1	0.537457	-1	-1	0.575308
ABprppaaaap	-1	-1	0.601012	-1	-1	0.625022	-1	-1	-1	-1	-1	-1	-1	-1	-1	-1	-1	-1	-1	-1	-1	-1	-1	-1	-1	0.710804	-1	-1	-1	0.549805	-1	-1	-1	-1	-1	-1	0.513769	-1	-1	-1	-1	0	-1	-1	-1	0.537457	-1	-1	0.575308
ABplppaaaapp	-1	-1	-1	-1	-1	0.796317	-1	0.619146	-1	-1	0.608185	-1	-1	-1	-1	-1	-1	-1	-1	-1	-1	-1	-1	-1	-1	1	-1	-1	-1	-1	-1	-1	-1	-1	-1	-1	0.658688	-1	-1	-1	-1	-1	-1	-1	-1	0.740233	-1	-1	0.571931
ABprppaaaapp	-1	-1	-1	-1	-1	0.796317	-1	0.619146	-1	-1	0.608185	-1	-1	-1	-1	-1	-1	-1	-1	-1	-1	-1	-1	-1	-1	1	-1	-1	-1	-1	-1	-1	-1	-1	-1	-1	0.658688	-1	-1	-1	-1	-1	-1	-1	-1	0.740233	-1	-1	0.571931
ABplppaap	-1	-1	0.764029	-1	-1	0.572401	-1	-1	-1	-1	-1	-1	-1	-1	-1	-1	-1	-1	-1	-1	-1	0.590222	-1	-1	-1	-1	-1	-1	-1	0.557452	-1	-1	-1	-1	-1	-1	0.391537	-1	-1	-1	-1	-1	-1	-1	-1	-1	-1	-1	0.618054
ABprppaap	-1	-1	0.764029	-1	-1	0.572401	-1	-1	-1	-1	-1	-1	-1	-1	-1	-1	-1	-1	-1	-1	-1	0.590222	-1	-1	-1	-1	-1	-1	-1	0.557452	-1	-1	-1	-1	-1	-1	0.391537	-1	-1	-1	-1	-1	-1	-1	-1	-1	-1	-1	0.618054
ABplppaapa	0.674977	-1	0.734763	-1	-1	0.549267	-1	-1	-1	-1	-1	-1	-1	-1	-1	-1	-1	-1	-1	-1	-1	-1	-1	-1	-1	0.627638	-1	-1	-1	0.63505	-1	0.521263	-1	-1	-1	-1	0.392367	-1	-1	-1	-1	-1	-1	-1	-1	-1	-1	-1	0.595202
ABprppaapa	0.674977	-1	0.734763	-1	-1	0.549267	-1	-1	-1	-1	-1	-1	-1	-1	-1	-1	-1	-1	-1	-1	-1	-1	-1	-1	-1	0.627638	-1	-1	-1	0.63505	-1	0.521263	-1	-1	-1	-1	0.392367	-1	-1	-1	-1	-1	-1	-1	-1	-1	-1	-1	0.595202
ABplppaapap	-1	-1	0.587879	-1	-1	0.747068	-1	-1	-1	-1	-1	-1	-1	-1	-1	-1	-1	-1	-1	-1	-1	-1	-1	-1	-1	0.985658	-1	-1	-1	-1	-1	-1	-1	0.908716	-1	-1	0	-1	-1	-1	-1	-1	0.746891	-1	-1	-1	-1	-1	0.728944
ABprppaapap	-1	-1	0.587879	-1	-1	0.747068	-1	-1	-1	-1	-1	-1	-1	-1	-1	-1	-1	-1	-1	-1	-1	-1	-1	-1	-1	0.985658	-1	-1	-1	-1	-1	-1	-1	0.908716	-1	-1	0	-1	-1	-1	-1	-1	0.746891	-1	-1	-1	-1	-1	0.728944
ABplppaapp	-1	-1	0.760921	-1	-1	0.572155	-1	-1	-1	-1	-1	-1	-1	-1	-1	-1	-1	-1	-1	-1	-1	0.62228	-1	-1	-1	0.662617	-1	-1	0.883373	-1	-1	-1	-1	-1	-1	-1	0	-1	-1	-1	-1	0.351868	-1	-1	-1	-1	-1	-1	0.57929
ABprppaapp	-1	-1	0.760921	-1	-1	0.572155	-1	-1	-1	-1	-1	-1	-1	-1	-1	-1	-1	-1	-1	-1	-1	0.62228	-1	-1	-1	0.662617	-1	-1	0.883373	-1	-1	-1	-1	-1	-1	-1	0	-1	-1	-1	-1	0.351868	-1	-1	-1	-1	-1	-1	0.57929
ABplppap	-1	0.305989	0.737971	-1	-1	-1	-1	-1	-1	-1	-1	0.682053	-1	-1	0.487368	-1	-1	-1	-1	-1	-1	-1	0.665239	-1	-1	-1	-1	-1	-1	0	-1	-1	-1	0.770836	-1	-1	0.403629	-1	-1	-1	-1	-1	-1	-1	-1	-1	-1	-1	0.607358
ABprppap	-1	0.305989	0.737971	-1	-1	-1	-1	-1	-1	-1	-1	0.682053	-1	-1	0.487368	-1	-1	-1	-1	-1	-1	-1	0.665239	-1	-1	-1	-1	-1	-1	0	-1	-1	-1	0.770836	-1	-1	0.403629	-1	-1	-1	-1	-1	-1	-1	-1	-1	-1	-1	0.607358
ABplppapa	-1	-1	0.819113	-1	0.679815	0.646731	-1	-1	-1	-1	-1	-1	-1	-1	-1	-1	-1	-1	-1	-1	-1	-1	-1	-1	-1	-1	-1	-1	-1	0.542877	-1	-1	-1	0.792124	-1	-1	0.313008	-1	-1	-1	-1	-1	-1	-1	-1	-1	-1	-1	0.638621
ABprppapa	-1	-1	0.819113	-1	0.679815	0.646731	-1	-1	-1	-1	-1	-1	-1	-1	-1	-1	-1	-1	-1	-1	-1	-1	-1	-1	-1	-1	-1	-1	-1	0.542877	-1	-1	-1	0.792124	-1	-1	0.313008	-1	-1	-1	-1	-1	-1	-1	-1	-1	-1	-1	0.638621
ABplppapaa	-1	-1	0.7489	-1	-1	0.580194	-1	-1	-1	-1	-1	-1	-1	0	-1	-1	-1	-1	-1	-1	-1	-1	0.653853	-1	-1	0.561824	-1	-1	0.836241	0.651511	-1	-1	-1	-1	-1	-1	0.489007	-1	-1	-1	-1	-1	-1	-1	-1	-1	-1	-1	0.61852
ABprppapaa	-1	-1	0.7489	-1	-1	0.580194	-1	-1	-1	-1	-1	-1	-1	0	-1	-1	-1	-1	-1	-1	-1	-1	0.653853	-1	-1	0.561824	-1	-1	0.836241	0.651511	-1	-1	-1	-1	-1	-1	0.489007	-1	-1	-1	-1	-1	-1	-1	-1	-1	-1	-1	0.61852
ABplppapap	-1	0.340314	0.756605	-1	-1	0.527709	-1	-1	0.458203	-1	-1	0.723481	-1	-1	-1	-1	-1	-1	-1	-1	-1	-1	-1	-1	-1	0.717698	-1	-1	-1	-1	-1	-1	-1	0.783827	-1	-1	0.409078	-1	-1	-1	-1	-1	-1	-1	-1	-1	-1	-1	0.628972
ABprppapap	-1	0.340314	0.756605	-1	-1	0.527709	-1	-1	0.458203	-1	-1	0.723481	-1	-1	-1	-1	-1	-1	-1	-1	-1	-1	-1	-1	-1	0.717698	-1	-1	-1	-1	-1	-1	-1	0.783827	-1	-1	0.409078	-1	-1	-1	-1	-1	-1	-1	-1	-1	-1	-1	0.628972
ABplppapp	0.601826	-1	0.774696	-1	-1	0.682194	-1	-1	-1	-1	-1	0.808853	-1	-1	-1	-1	-1	-1	-1	-1	-1	-1	-1	-1	-1	-1	-1	-1	-1	0.535313	-1	-1	-1	0.759219	-1	-1	0	-1	-1	-1	-1	-1	-1	-1	-1	-1	-1	-1	0.645968
ABprppapp	0.601826	-1	0.774696	-1	-1	0.682194	-1	-1	-1	-1	-1	0.808853	-1	-1	-1	-1	-1	-1	-1	-1	-1	-1	-1	-1	-1	-1	-1	-1	-1	0.535313	-1	-1	-1	0.759219	-1	-1	0	-1	-1	-1	-1	-1	-1	-1	-1	-1	-1	-1	0.645968
ABplppappa	0.711832	-1	0.63886	-1	-1	0.548838	-1	-1	-1	-1	-1	0.762738	-1	-1	-1	-1	-1	-1	-1	-1	-1	-1	-1	-1	-1	0.66497	-1	-1	-1	-1	-1	0.506189	-1	-1	-1	-1	0.487913	-1	-1	-1	-1	-1	-1	-1	-1	-1	-1	-1	0.609514
ABprppappa	0.711832	-1	0.63886	-1	-1	0.548838	-1	-1	-1	-1	-1	0.762738	-1	-1	-1	-1	-1	-1	-1	-1	-1	-1	-1	-1	-1	0.66497	-1	-1	-1	-1	-1	0.506189	-1	-1	-1	-1	0.487913	-1	-1	-1	-1	-1	-1	-1	-1	-1	-1	-1	0.609514
ABplppappp	-1	0.500695	0.658839	-1	-1	0.519336	-1	-1	-1	-1	-1	0.779563	-1	-1	-1	-1	-1	-1	-1	-1	-1	-1	0.604823	-1	-1	0.561814	-1	-1	-1	-1	-1	0.601092	-1	0.871537	-1	-1	0.390934	-1	-1	-1	-1	-1	-1	-1	-1	-1	-1	-1	0.606011
ABprppappp	-1	0.500695	0.658839	-1	-1	0.519336	-1	-1	-1	-1	-1	0.779563	-1	-1	-1	-1	-1	-1	-1	-1	-1	-1	0.604823	-1	-1	0.561814	-1	-1	-1	-1	-1	0.601092	-1	0.871537	-1	-1	0.390934	-1	-1	-1	-1	-1	-1	-1	-1	-1	-1	-1	0.606011
ABplppp	-1	-1	0.780927	-1	0.593465	-1	-1	-1	-1	-1	-1	0.58733	-1	-1	-1	-1	-1	-1	-1	-1	-1	0.527144	0.700311	-1	-1	-1	-1	-1	-1	0	-1	-1	-1	-1	-1	-1	0.514285	-1	-1	-1	-1	-1	0.632276	-1	-1	-1	-1	-1	0.662829
ABprppp	-1	-1	0.780927	-1	0.593465	-1	-1	-1	-1	-1	-1	0.58733	-1	-1	-1	-1	-1	-1	-1	-1	-1	0.527144	0.700311	-1	-1	-1	-1	-1	-1	0	-1	-1	-1	-1	-1	-1	0.514285	-1	-1	-1	-1	-1	0.632276	-1	-1	-1	-1	-1	0.662829
ABplpppa	-1	-1	0.785337	-1	-1	0.518014	-1	-1	-1	-1	-1	-1	-1	-1	-1	-1	-1	-1	-1	-1	-1	0.533478	-1	-1	-1	-1	-1	-1	-1	0.511664	-1	-1	-1	-1	-1	-1	0.536371	-1	-1	0.596333	-1	-1	-1	-1	-1	-1	-1	-1	0.616896
ABprpppa	-1	-1	0.785337	-1	-1	0.518014	-1	-1	-1	-1	-1	-1	-1	-1	-1	-1	-1	-1	-1	-1	-1	0.533478	-1	-1	-1	-1	-1	-1	-1	0.511664	-1	-1	-1	-1	-1	-1	0.536371	-1	-1	0.596333	-1	-1	-1	-1	-1	-1	-1	-1	0.616896
ABplpppaa	-1	-1	0.8106	-1	-1	0.470753	-1	-1	0.412001	-1	-1	-1	-1	-1	-1	-1	-1	-1	-1	-1	-1	-1	-1	-1	-1	-1	-1	-1	-1	0.577698	-1	-1	-1	-1	-1	-1	0.528115	-1	-1	-1	-1	-1	-1	-1	-1	-1	-1	-1	0.627942
ABprpppaa	-1	-1	0.8106	-1	-1	0.470753	-1	-1	0.412001	-1	-1	-1	-1	-1	-1	-1	-1	-1	-1	-1	-1	-1	-1	-1	-1	-1	-1	-1	-1	0.577698	-1	-1	-1	-1	-1	-1	0.528115	-1	-1	-1	-1	-1	-1	-1	-1	-1	-1	-1	0.627942
ABplpppaaa	-1	-1	0.859143	-1	0.640937	0.505419	-1	-1	-1	-1	-1	-1	-1	-1	-1	-1	-1	-1	-1	-1	-1	-1	-1	-1	-1	-1	-1	-1	0.866026	-1	-1	-1	-1	-1	-1	-1	0.476963	-1	-1	-1	-1	-1	-1	-1	-1	-1	-1	-1	0.633768
ABprpppaaa	-1	-1	0.859143	-1	0.640937	0.505419	-1	-1	-1	-1	-1	-1	-1	-1	-1	-1	-1	-1	-1	-1	-1	-1	-1	-1	-1	-1	-1	-1	0.866026	-1	-1	-1	-1	-1	-1	-1	0.476963	-1	-1	-1	-1	-1	-1	-1	-1	-1	-1	-1	0.633768
ABplpppaap	-1	0.447194	-1	-1	0.630906	0.554911	-1	-1	-1	-1	-1	-1	-1	-1	-1	-1	-1	-1	0.318183	-1	-1	-1	-1	0.701441	-1	0.614939	-1	-1	-1	0.682598	-1	-1	-1	-1	-1	-1	0	-1	-1	-1	-1	-1	-1	-1	-1	-1	-1	-1	0.635151
ABprpppaap	-1	0.447194	-1	-1	0.630906	0.554911	-1	-1	-1	-1	-1	-1	-1	-1	-1	-1	-1	-1	0.318183	-1	-1	-1	-1	0.701441	-1	0.614939	-1	-1	-1	0.682598	-1	-1	-1	-1	-1	-1	0	-1	-1	-1	-1	-1	-1	-1	-1	-1	-1	-1	0.635151
ABplpppaapa	-1	-1	0.583607	-1	-1	0.566268	-1	-1	0.475799	-1	-1	-1	-1	-1	-1	-1	-1	-1	0.370624	-1	-1	-1	-1	-1	-1	0.792511	-1	-1	-1	-1	-1	-1	-1	0.893918	-1	-1	0	-1	-1	-1	-1	0	-1	-1	-1	-1	0.597646	-1	0.589412
ABprpppaapa	-1	-1	0.583607	-1	-1	0.566268	-1	-1	0.475799	-1	-1	-1	-1	-1	-1	-1	-1	-1	0.370624	-1	-1	-1	-1	-1	-1	0.792511	-1	-1	-1	-1	-1	-1	-1	0.893918	-1	-1	0	-1	-1	-1	-1	0	-1	-1	-1	-1	0.597646	-1	0.589412
ABplpppap	0.639433	0.268204	0.763539	-1	-1	0.543544	-1	-1	-1	-1	-1	-1	-1	-1	-1	-1	-1	-1	-1	-1	-1	-1	-1	-1	-1	-1	-1	-1	-1	0.568872	-1	-1	-1	-1	-1	-1	0.511244	-1	-1	-1	-1	-1	-1	-1	-1	-1	-1	-1	0.598385
ABprpppap	0.639433	0.268204	0.763539	-1	-1	0.543544	-1	-1	-1	-1	-1	-1	-1	-1	-1	-1	-1	-1	-1	-1	-1	-1	-1	-1	-1	-1	-1	-1	-1	0.568872	-1	-1	-1	-1	-1	-1	0.511244	-1	-1	-1	-1	-1	-1	-1	-1	-1	-1	-1	0.598385
ABplpppapa	-1	-1	0.713103	-1	-1	0.546327	-1	-1	-1	-1	0.4794	-1	-1	-1	-1	-1	-1	-1	-1	-1	-1	-1	-1	0.608374	-1	-1	-1	-1	-1	0.619529	-1	-1	-1	-1	-1	-1	0.424175	-1	-1	-1	-1	-1	-1	-1	-1	-1	-1	-1	0.751265
ABprpppapa	-1	-1	0.713103	-1	-1	0.546327	-1	-1	-1	-1	0.4794	-1	-1	-1	-1	-1	-1	-1	-1	-1	-1	-1	-1	0.608374	-1	-1	-1	-1	-1	0.619529	-1	-1	-1	-1	-1	-1	0.424175	-1	-1	-1	-1	-1	-1	-1	-1	-1	-1	-1	0.751265
ABplpppp	-1	-1	0.757687	-1	0.604668	-1	-1	-1	0.526914	-1	-1	0.634969	-1	-1	-1	-1	-1	-1	-1	-1	-1	0.559833	0.708788	-1	-1	-1	-1	-1	-1	0	-1	-1	-1	-1	0.0846682	-1	-1	-1	-1	-1	-1	-1	-1	-1	-1	-1	-1	-1	0.623594
ABprpppp	-1	-1	0.757687	-1	0.604668	-1	-1	-1	0.526914	-1	-1	0.634969	-1	-1	-1	-1	-1	-1	-1	-1	-1	0.559833	0.708788	-1	-1	-1	-1	-1	-1	0	-1	-1	-1	-1	0.0846682	-1	-1	-1	-1	-1	-1	-1	-1	-1	-1	-1	-1	-1	0.623594
ABplppppa	-1	-1	0.796345	-1	-1	0.584275	-1	-1	0.431668	-1	-1	-1	-1	-1	-1	-1	-1	-1	-1	-1	-1	0.565072	0.681275	-1	-1	-1	-1	-1	-1	0.55468	-1	-1	-1	-1	-1	-1	-1	-1	-1	-1	-1	-1	-1	-1	-1	-1	-1	-1	0.633138
ABprppppa	-1	-1	0.796345	-1	-1	0.584275	-1	-1	0.431668	-1	-1	-1	-1	-1	-1	-1	-1	-1	-1	-1	-1	0.565072	0.681275	-1	-1	-1	-1	-1	-1	0.55468	-1	-1	-1	-1	-1	-1	-1	-1	-1	-1	-1	-1	-1	-1	-1	-1	-1	-1	0.633138
ABplppppaa	0.63772	0.361549	-1	-1	-1	0.572292	-1	-1	-1	-1	-1	-1	-1	-1	-1	-1	-1	-1	-1	-1	-1	-1	-1	-1	-1	-1	-1	-1	-1	0.630119	-1	0.623644	-1	-1	-1	-1	0.435769	0.538602	-1	-1	0.670328	-1	-1	-1	-1	-1	-1	-1	0.607955
ABprppppaa	0.63772	0.361549	-1	-1	-1	0.572292	-1	-1	-1	-1	-1	-1	-1	-1	-1	-1	-1	-1	-1	-1	-1	-1	-1	-1	-1	-1	-1	-1	-1	0.630119	-1	0.623644	-1	-1	-1	-1	0.435769	0.538602	-1	-1	0.670328	-1	-1	-1	-1	-1	-1	-1	0.607955
ABplppppaaa	-1	-1	0.666078	-1	-1	0.706479	-1	-1	-1	-1	-1	-1	-1	-1	-1	-1	-1	-1	-1	-1	-1	-1	0.77543	-1	-1	0.890826	-1	-1	-1	-1	-1	-1	-1	-1	-1	-1	-1	0.594693	-1	-1	-1	-1	-1	-1	-1	-1	-1	-1	0.74865
ABprppppaaa	-1	-1	0.666078	-1	-1	0.706479	-1	-1	-1	-1	-1	-1	-1	-1	-1	-1	-1	-1	-1	-1	-1	-1	0.77543	-1	-1	0.890826	-1	-1	-1	-1	-1	-1	-1	-1	-1	-1	-1	0.594693	-1	-1	-1	-1	-1	-1	-1	-1	-1	-1	0.74865
ABplppppap	-1	-1	0.859798	-1	-1	0.580591	-1	-1	-1	-1	0.496975	-1	-1	-1	-1	-1	-1	-1	-1	-1	-1	-1	0.722739	-1	-1	-1	-1	-1	0.827509	0.60133	-1	-1	-1	0.761669	0.486797	-1	0.376962	-1	-1	-1	-1	-1	-1	-1	-1	-1	-1	-1	0.623713
ABprppppap	-1	-1	0.859798	-1	-1	0.580591	-1	-1	-1	-1	0.496975	-1	-1	-1	-1	-1	-1	-1	-1	-1	-1	-1	0.722739	-1	-1	-1	-1	-1	0.827509	0.60133	-1	-1	-1	0.761669	0.486797	-1	0.376962	-1	-1	-1	-1	-1	-1	-1	-1	-1	-1	-1	0.623713
ABplppppp	0.589149	0.138629	0.735761	-1	0.655263	0.584135	-1	-1	-1	-1	-1	-1	-1	-1	-1	-1	-1	-1	-1	-1	-1	-1	-1	-1	-1	-1	-1	-1	-1	0.560349	-1	-1	-1	-1	0.480591	-1	-1	-1	-1	-1	-1	-1	-1	-1	-1	-1	-1	-1	0.585655
ABprppppp	0.589149	0.138629	0.735761	-1	0.655263	0.584135	-1	-1	-1	-1	-1	-1	-1	-1	-1	-1	-1	-1	-1	-1	-1	-1	-1	-1	-1	-1	-1	-1	-1	0.560349	-1	-1	-1	-1	0.480591	-1	-1	-1	-1	-1	-1	-1	-1	-1	-1	-1	-1	-1	0.585655
ABplpppppa	0.557409	-1	0.677809	0	0.586909	0.506311	-1	-1	-1	-1	-1	-1	-1	-1	-1	-1	-1	-1	-1	-1	-1	-1	0.648584	-1	-1	-1	-1	-1	-1	-1	-1	-1	-1	-1	0.514783	-1	0.440057	-1	-1	-1	-1	-1	-1	-1	-1	-1	-1	-1	0.540245
ABprpppppa	0.557409	-1	0.677809	0	0.586909	0.506311	-1	-1	-1	-1	-1	-1	-1	-1	-1	-1	-1	-1	-1	-1	-1	-1	0.648584	-1	-1	-1	-1	-1	-1	-1	-1	-1	-1	-1	0.514783	-1	0.440057	-1	-1	-1	-1	-1	-1	-1	-1	-1	-1	-1	0.540245
ABplpppppp	-1	0.416646	-1	-1	0.625803	0.470221	-1	-1	-1	-1	-1	-1	-1	-1	-1	-1	-1	-1	-1	-1	-1	-1	-1	0.721837	-1	-1	-1	-1	-1	-1	-1	-1	-1	-1	-1	-1	0.394749	-1	-1	-1	-1	-1	-1	-1	-1	-1	-1	-1	0.514208
ABprpppppp	-1	0.416646	-1	-1	0.625803	0.470221	-1	-1	-1	-1	-1	-1	-1	-1	-1	-1	-1	-1	-1	-1	-1	-1	-1	0.721837	-1	-1	-1	-1	-1	-1	-1	-1	-1	-1	-1	-1	0.394749	-1	-1	-1	-1	-1	-1	-1	-1	-1	-1	-1	0.514208
Caapa	-1	-1	0.558539	-1	-1	0.582303	-1	-1	-1	-1	-1	-1	-1	-1	0.378261	-1	-1	-1	-1	-1	-1	-1	0.613672	0.693046	-1	0.594452	-1	-1	-1	-1	-1	0	-1	-1	-1	-1	0	-1	0.69315	-1	-1	-1	-1	-1	-1	-1	-1	-1	0.595734
Caapaa	-1	-1	-1	-1	-1	0.789281	-1	-1	-1	0.50619	0.709186	-1	0.616025	-1	-1	-1	-1	-1	-1	-1	-1	-1	0.798471	-1	-1	0.983794	-1	-1	-1	-1	-1	-1	-1	-1	-1	-1	0.589862	-1	-1	0.704293	-1	0	-1	-1	-1	-1	-1	-1	0.763889
Caappv	-1	-1	-1	-1	-1	0.669761	-1	-1	-1	0.621437	-1	-1	-1	-1	-1	-1	-1	-1	0.615374	1	-1	-1	0.828788	-1	-1	0.925555	-1	-1	-1	-1	-1	-1	-1	0.962847	-1	-1	0.226395	-1	-1	-1	0.70978	-1	-1	-1	-1	-1	-1	-1	-1
Cpapa	-1	-1	0.691791	-1	-1	0.727444	-1	-1	-1	-1	-1	-1	-1	-1	-1	-1	-1	-1	-1	-1	-1	-1	-1	-1	-1	-1	-1	-1	-1	-1	-1	-1	-1	-1	-1	-1	-1	-1	1	-1	-1	-1	-1	-1	-1	-1	-1	-1	0.654055
Cpapaa	0.799702	-1	0.401308	-1	-1	0.769844	-1	-1	-1	-1	0.588203	-1	-1	-1	-1	-1	-1	-1	-1	-1	-1	-1	-1	-1	-1	-1	-1	-1	-1	-1	-1	-1	-1	-1	-1	-1	0	-1	1	-1	0.95922	-1	-1	-1	-1	-1	-1	-1	0.581976
Cpapap	0.799702	-1	0.401308	-1	-1	0.769844	-1	-1	-1	-1	0.588203	-1	-1	-1	-1	-1	-1	-1	-1	-1	-1	-1	-1	-1	-1	-1	-1	-1	-1	-1	-1	-1	-1	-1	-1	-1	0	-1	1	-1	0.95922	-1	-1	-1	-1	-1	-1	-1	0.581976
Cpappv	0.830965	-1	-1	-1	0.659854	0.762417	-1	-1	-1	-1	0.591525	0.499276	-1	-1	-1	-1	-1	-1	-1	-1	-1	-1	-1	-1	-1	-1	-1	-1	-1	-1	-1	-1	-1	-1	-1	-1	-1	-1	0.977471	-1	1	-1	-1	-1	-1	-1	-1	-1	0.625918
Ca	0.782245	-1	0.879296	-1	0.64293	0.522411	-1	-1	-1	-1	-1	-1	-1	-1	-1	-1	-1	-1	-1	-1	-1	-1	0.807503	-1	-1	-1	-1	-1	-1	0	-1	-1	-1	-1	-1	-1	0.617856	-1	-1	-1	-1	-1	-1	-1	-1	-1	-1	-1	0.734037
Cp	0.782245	-1	0.879296	-1	0.64293	0.522411	-1	-1	-1	-1	-1	-1	-1	-1	-1	-1	-1	-1	-1	-1	-1	-1	0.807503	-1	-1	-1	-1	-1	-1	0	-1	-1	-1	-1	-1	-1	0.617856	-1	-1	-1	-1	-1	-1	-1	-1	-1	-1	-1	0.734037
Caa	-1	0	0.81904	-1	0	0.686421	-1	-1	-1	-1	-1	-1	-1	-1	-1	-1	-1	-1	-1	-1	-1	-1	0.717299	-1	-1	-1	-1	-1	-1	0	-1	-1	-1	-1	-1	-1	-1	-1	0.832283	-1	-1	-1	-1	-1	-1	-1	-1	-1	0.739131
Cpa	-1	0	0.81904	-1	0	0.686421	-1	-1	-1	-1	-1	-1	-1	-1	-1	-1	-1	-1	-1	-1	-1	-1	0.717299	-1	-1	-1	-1	-1	-1	0	-1	-1	-1	-1	-1	-1	-1	-1	0.832283	-1	-1	-1	-1	-1	-1	-1	-1	-1	0.739131
Caaa	-1	-1	0.70973	-1	-1	0.656601	-1	-1	-1	-1	-1	-1	-1	-1	-1	-1	-1	-1	-1	-1	-1	-1	0.693277	-1	-1	-1	-1	-1	-1	0.941445	-1	-1	-1	-1	-1	-1	-1	-1	0.990205	0.939802	0.765732	-1	-1	-1	-1	-1	-1	-1	0.61326
Cpaa	-1	-1	0.70973	-1	-1	0.656601	-1	-1	-1	-1	-1	-1	-1	-1	-1	-1	-1	-1	-1	-1	-1	-1	0.693277	-1	-1	-1	-1	-1	-1	0.941445	-1	-1	-1	-1	-1	-1	-1	-1	0.990205	0.939802	0.765732	-1	-1	-1	-1	-1	-1	-1	0.61326
Caaaaa	0.821664	-1	-1	-1	-1	0.76933	-1	-1	-1	-1	0.368983	0.404319	-1	-1	-1	-1	-1	-1	-1	-1	-1	-1	-1	-1	-1	-1	-1	-1	-1	-1	-1	-1	-1	-1	-1	-1	-1	-1	1	-1	0.994276	-1	-1	-1	-1	-1	-1	-1	0.561473
Caaaap	0.821664	-1	-1	-1	-1	0.76933	-1	-1	-1	-1	0.368983	0.404319	-1	-1	-1	-1	-1	-1	-1	-1	-1	-1	-1	-1	-1	-1	-1	-1	-1	-1	-1	-1	-1	-1	-1	-1	-1	-1	1	-1	0.994276	-1	-1	-1	-1	-1	-1	-1	0.561473
Cpaaaa	0.821664	-1	-1	-1	-1	0.76933	-1	-1	-1	-1	0.368983	0.404319	-1	-1	-1	-1	-1	-1	-1	-1	-1	-1	-1	-1	-1	-1	-1	-1	-1	-1	-1	-1	-1	-1	-1	-1	-1	-1	1	-1	0.994276	-1	-1	-1	-1	-1	-1	-1	0.561473
Cpaaap	0.821664	-1	-1	-1	-1	0.76933	-1	-1	-1	-1	0.368983	0.404319	-1	-1	-1	-1	-1	-1	-1	-1	-1	-1	-1	-1	-1	-1	-1	-1	-1	-1	-1	-1	-1	-1	-1	-1	-1	-1	1	-1	0.994276	-1	-1	-1	-1	-1	-1	-1	0.561473
Caaapa	0.821664	-1	-1	-1	-1	0.76933	-1	-1	-1	-1	0.368983	0.404319	-1	-1	-1	-1	-1	-1	-1	-1	-1	-1	-1	-1	-1	-1	-1	-1	-1	-1	-1	-1	-1	-1	-1	-1	-1	-1	1	-1	0.994276	-1	-1	-1	-1	-1	-1	-1	0.561473
Cpaapa	0.821664	-1	-1	-1	-1	0.76933	-1	-1	-1	-1	0.368983	0.404319	-1	-1	-1	-1	-1	-1	-1	-1	-1	-1	-1	-1	-1	-1	-1	-1	-1	-1	-1	-1	-1	-1	-1	-1	-1	-1	1	-1	0.994276	-1	-1	-1	-1	-1	-1	-1	0.561473
Caaapp	0.80621	-1	0.415192	-1	-1	0.72502	-1	-1	-1	-1	0.553425	-1	-1	-1	-1	-1	-1	-1	-1	-1	-1	-1	-1	-1	-1	-1	-1	-1	-1	-1	-1	-1	-1	-1	-1	-1	-1	-1	0.954057	-1	1	-1	-1	-1	-1	-1	-1	-1	0.680092
Cpaapp	0.80621	-1	0.415192	-1	-1	0.72502	-1	-1	-1	-1	0.553425	-1	-1	-1	-1	-1	-1	-1	-1	-1	-1	-1	-1	-1	-1	-1	-1	-1	-1	-1	-1	-1	-1	-1	-1	-1	-1	-1	0.954057	-1	1	-1	-1	-1	-1	-1	-1	-1	0.680092
Caaaa	-1	-1	0.630925	-1	-1	0.774958	-1	-1	-1	-1	-1	-1	-1	-1	-1	-1	-1	-1	-1	-1	-1	-1	0.635237	-1	-1	-1	-1	-1	-1	0.618542	-1	-1	-1	-1	-1	-1	0	-1	1	-1	0.983003	-1	-1	-1	-1	-1	-1	-1	0.602664
Caaap	-1	-1	0.630925	-1	-1	0.774958	-1	-1	-1	-1	-1	-1	-1	-1	-1	-1	-1	-1	-1	-1	-1	-1	0.635237	-1	-1	-1	-1	-1	-1	0.618542	-1	-1	-1	-1	-1	-1	0	-1	1	-1	0.983003	-1	-1	-1	-1	-1	-1	-1	0.602664
Cpaaa	-1	-1	0.630925	-1	-1	0.774958	-1	-1	-1	-1	-1	-1	-1	-1	-1	-1	-1	-1	-1	-1	-1	-1	0.635237	-1	-1	-1	-1	-1	-1	0.618542	-1	-1	-1	-1	-1	-1	0	-1	1	-1	0.983003	-1	-1	-1	-1	-1	-1	-1	0.602664
Cpaap	-1	-1	0.630925	-1	-1	0.774958	-1	-1	-1	-1	-1	-1	-1	-1	-1	-1	-1	-1	-1	-1	-1	-1	0.635237	-1	-1	-1	-1	-1	-1	0.618542	-1	-1	-1	-1	-1	-1	0	-1	1	-1	0.983003	-1	-1	-1	-1	-1	-1	-1	0.602664
Caap	0.605145	-1	0.780082	-1	0.585025	0.605424	-1	-1	0.772946	-1	-1	-1	-1	-1	-1	-1	-1	-1	-1	-1	-1	-1	-1	-1	-1	-1	-1	-1	-1	0	-1	-1	-1	-1	-1	-1	0	-1	0.896311	-1	0	-1	-1	-1	-1	-1	-1	-1	0.678115
Cpap	0.605145	-1	0.780082	-1	0.585025	0.605424	-1	-1	0.772946	-1	-1	-1	-1	-1	-1	-1	-1	-1	-1	-1	-1	-1	-1	-1	-1	-1	-1	-1	-1	0	-1	-1	-1	-1	-1	-1	0	-1	0.896311	-1	0	-1	-1	-1	-1	-1	-1	-1	0.678115
Caapp	-1	-1	0.693777	-1	-1	0.611788	-1	-1	-1	-1	-1	-1	-1	-1	-1	-1	-1	-1	-1	-1	-1	-1	-1	-1	-1	-1	-1	-1	-1	0.584895	-1	-1	-1	-1	-1	-1	0	-1	0.900715	-1	0.854484	-1	-1	-1	-1	-1	-1	-1	0.59567
Cpapp	-1	-1	0.693777	-1	-1	0.611788	-1	-1	-1	-1	-1	-1	-1	-1	-1	-1	-1	-1	-1	-1	-1	-1	-1	-1	-1	-1	-1	-1	-1	0.584895	-1	-1	-1	-1	-1	-1	0	-1	0.900715	-1	0.854484	-1	-1	-1	-1	-1	-1	-1	0.59567
Caappd	-1	-1	0.610166	-1	-1	0.734785	-1	-1	-1	-1	0.508251	-1	-1	-1	-1	-1	-1	-1	-1	-1	-1	-1	-1	-1	-1	-1	-1	-1	-1	-1	-1	-1	-1	-1	-1	-1	-1	-1	0.972178	-1	1	-1	-1	-1	-1	-1	-1	-1	0.634055
Cpappd	-1	-1	0.610166	-1	-1	0.734785	-1	-1	-1	-1	0.508251	-1	-1	-1	-1	-1	-1	-1	-1	-1	-1	-1	-1	-1	-1	-1	-1	-1	-1	-1	-1	-1	-1	-1	-1	-1	-1	-1	0.972178	-1	1	-1	-1	-1	-1	-1	-1	-1	0.634055
Cap	0.605503	0	0.762582	-1	0	-1	-1	-1	-1	-1	-1	-1	-1	-1	-1	-1	-1	-1	-1	-1	-1	-1	0.697664	-1	-1	-1	-1	-1	-1	0	-1	-1	-1	-1	-1	-1	0	-1	-1	-1	-1	-1	-1	-1	-1	-1	-1	-1	0.632376
Cpp	0.605503	0	0.762582	-1	0	-1	-1	-1	-1	-1	-1	-1	-1	-1	-1	-1	-1	-1	-1	-1	-1	-1	0.697664	-1	-1	-1	-1	-1	-1	0	-1	-1	-1	-1	-1	-1	0	-1	-1	-1	-1	-1	-1	-1	-1	-1	-1	-1	0.632376
Capa	-1	-1	0.609169	0	0.62041	-1	-1	-1	-1	-1	-1	-1	-1	-1	-1	-1	-1	-1	-1	-1	-1	-1	-1	-1	-1	-1	-1	-1	-1	0.615184	-1	-1	-1	-1	-1	-1	0	-1	-1	-1	-1	-1	-1	-1	-1	-1	-1	-1	0.570507
Cppa	-1	-1	0.609169	0	0.62041	-1	-1	-1	-1	-1	-1	-1	-1	-1	-1	-1	-1	-1	-1	-1	-1	-1	-1	-1	-1	-1	-1	-1	-1	0.615184	-1	-1	-1	-1	-1	-1	0	-1	-1	-1	-1	-1	-1	-1	-1	-1	-1	-1	0.570507
Capaa	-1	-1	0.601965	0.376807	-1	-1	-1	-1	-1	-1	-1	-1	-1	-1	-1	-1	-1	-1	-1	-1	-1	-1	-1	-1	-1	-1	-1	-1	-1	0.733732	-1	-1	-1	-1	-1	-1	-1	-1	-1	-1	-1	-1	-1	-1	-1	-1	-1	-1	0.561448
Cppaa	-1	-1	0.601965	0.376807	-1	-1	-1	-1	-1	-1	-1	-1	-1	-1	-1	-1	-1	-1	-1	-1	-1	-1	-1	-1	-1	-1	-1	-1	-1	0.733732	-1	-1	-1	-1	-1	-1	-1	-1	-1	-1	-1	-1	-1	-1	-1	-1	-1	-1	0.561448
Capaaa	0.57878	-1	0.54696	0	-1	-1	-1	-1	-1	-1	-1	-1	-1	-1	-1	-1	-1	-1	-1	-1	-1	-1	-1	-1	-1	-1	-1	-1	-1	0.741893	-1	-1	-1	-1	-1	-1	0	-1	-1	-1	-1	-1	-1	-1	-1	-1	-1	-1	0.489031
Cppaaa	0.57878	-1	0.54696	0	-1	-1	-1	-1	-1	-1	-1	-1	-1	-1	-1	-1	-1	-1	-1	-1	-1	-1	-1	-1	-1	-1	-1	-1	-1	0.741893	-1	-1	-1	-1	-1	-1	0	-1	-1	-1	-1	-1	-1	-1	-1	-1	-1	-1	0.489031
Capaaaa	-1	-1	-1	0	-1	-1	-1	-1	-1	-1	-1	-1	-1	-1	-1	-1	-1	-1	-1	-1	-1	-1	-1	-1	-1	-1	-1	-1	-1	0.767418	-1	-1	-1	-1	-1	-1	-1	-1	-1	-1	-1	-1	-1	-1	-1	-1	-1	-1	0.438478
Capaaap	-1	-1	-1	0	-1	-1	-1	-1	-1	-1	-1	-1	-1	-1	-1	-1	-1	-1	-1	-1	-1	-1	-1	-1	-1	-1	-1	-1	-1	0.767418	-1	-1	-1	-1	-1	-1	-1	-1	-1	-1	-1	-1	-1	-1	-1	-1	-1	-1	0.438478
Cppaaaa	-1	-1	-1	0	-1	-1	-1	-1	-1	-1	-1	-1	-1	-1	-1	-1	-1	-1	-1	-1	-1	-1	-1	-1	-1	-1	-1	-1	-1	0.767418	-1	-1	-1	-1	-1	-1	-1	-1	-1	-1	-1	-1	-1	-1	-1	-1	-1	-1	0.438478
Cppaaap	-1	-1	-1	0	-1	-1	-1	-1	-1	-1	-1	-1	-1	-1	-1	-1	-1	-1	-1	-1	-1	-1	-1	-1	-1	-1	-1	-1	-1	0.767418	-1	-1	-1	-1	-1	-1	-1	-1	-1	-1	-1	-1	-1	-1	-1	-1	-1	-1	0.438478
Capaap	-1	-1	-1	0.347426	-1	-1	-1	-1	-1	-1	-1	-1	-1	-1	-1	-1	-1	-1	-1	-1	-1	-1	-1	-1	-1	-1	-1	-1	-1	0.729993	-1	-1	-1	-1	-1	-1	0.519706	-1	-1	-1	-1	-1	-1	-1	-1	-1	-1	-1	0.485688
Cppaap	-1	-1	-1	0.347426	-1	-1	-1	-1	-1	-1	-1	-1	-1	-1	-1	-1	-1	-1	-1	-1	-1	-1	-1	-1	-1	-1	-1	-1	-1	0.729993	-1	-1	-1	-1	-1	-1	0.519706	-1	-1	-1	-1	-1	-1	-1	-1	-1	-1	-1	0.485688
Capaapa	-1	-1	-1	0.592389	0.578207	-1	-1	-1	-1	-1	-1	-1	-1	-1	-1	-1	-1	-1	-1	-1	-1	-1	-1	-1	-1	-1	-1	-1	-1	0.711271	-1	-1	-1	-1	-1	-1	0	-1	-1	-1	-1	-1	-1	-1	-1	-1	-1	-1	0.445829
Capaapp	-1	-1	-1	0.592389	0.578207	-1	-1	-1	-1	-1	-1	-1	-1	-1	-1	-1	-1	-1	-1	-1	-1	-1	-1	-1	-1	-1	-1	-1	-1	0.711271	-1	-1	-1	-1	-1	-1	0	-1	-1	-1	-1	-1	-1	-1	-1	-1	-1	-1	0.445829
Cppaapa	-1	-1	-1	0.592389	0.578207	-1	-1	-1	-1	-1	-1	-1	-1	-1	-1	-1	-1	-1	-1	-1	-1	-1	-1	-1	-1	-1	-1	-1	-1	0.711271	-1	-1	-1	-1	-1	-1	0	-1	-1	-1	-1	-1	-1	-1	-1	-1	-1	-1	0.445829
Cppaapp	-1	-1	-1	0.592389	0.578207	-1	-1	-1	-1	-1	-1	-1	-1	-1	-1	-1	-1	-1	-1	-1	-1	-1	-1	-1	-1	-1	-1	-1	-1	0.711271	-1	-1	-1	-1	-1	-1	0	-1	-1	-1	-1	-1	-1	-1	-1	-1	-1	-1	0.445829
Capap	-1	-1	0.615833	0	0.643224	-1	-1	-1	0.508992	-1	-1	-1	-1	-1	-1	-1	-1	-1	-1	-1	-1	-1	-1	-1	-1	-1	-1	-1	-1	0.764183	-1	-1	-1	-1	-1	-1	0.368751	-1	-1	-1	-1	-1	-1	-1	-1	-1	-1	-1	0.658031
Cppap	-1	-1	0.615833	0	0.643224	-1	-1	-1	0.508992	-1	-1	-1	-1	-1	-1	-1	-1	-1	-1	-1	-1	-1	-1	-1	-1	-1	-1	-1	-1	0.764183	-1	-1	-1	-1	-1	-1	0.368751	-1	-1	-1	-1	-1	-1	-1	-1	-1	-1	-1	0.658031
Capapa	-1	-1	-1	0.48343	-1	-1	-1	-1	-1	-1	-1	-1	-1	-1	-1	-1	-1	-1	-1	-1	-1	-1	-1	-1	-1	-1	-1	-1	-1	0.738812	-1	-1	-1	-1	-1	-1	0	-1	-1	-1	-1	-1	-1	-1	-1	-1	-1	-1	0.491904
Cppapa	-1	-1	-1	0.48343	-1	-1	-1	-1	-1	-1	-1	-1	-1	-1	-1	-1	-1	-1	-1	-1	-1	-1	-1	-1	-1	-1	-1	-1	-1	0.738812	-1	-1	-1	-1	-1	-1	0	-1	-1	-1	-1	-1	-1	-1	-1	-1	-1	-1	0.491904
Capapaa	-1	-1	-1	0	-1	-1	-1	-1	-1	-1	-1	-1	-1	-1	-1	-1	-1	-1	-1	-1	-1	-1	-1	-1	-1	-1	-1	-1	-1	0.754114	-1	-1	-1	-1	-1	-1	-1	-1	-1	-1	-1	-1	-1	-1	-1	-1	-1	-1	0.399612
Capapap	-1	-1	-1	0	-1	-1	-1	-1	-1	-1	-1	-1	-1	-1	-1	-1	-1	-1	-1	-1	-1	-1	-1	-1	-1	-1	-1	-1	-1	0.754114	-1	-1	-1	-1	-1	-1	-1	-1	-1	-1	-1	-1	-1	-1	-1	-1	-1	-1	0.399612
Cppapaa	-1	-1	-1	0	-1	-1	-1	-1	-1	-1	-1	-1	-1	-1	-1	-1	-1	-1	-1	-1	-1	-1	-1	-1	-1	-1	-1	-1	-1	0.754114	-1	-1	-1	-1	-1	-1	-1	-1	-1	-1	-1	-1	-1	-1	-1	-1	-1	-1	0.399612
Cppapap	-1	-1	-1	0	-1	-1	-1	-1	-1	-1	-1	-1	-1	-1	-1	-1	-1	-1	-1	-1	-1	-1	-1	-1	-1	-1	-1	-1	-1	0.754114	-1	-1	-1	-1	-1	-1	-1	-1	-1	-1	-1	-1	-1	-1	-1	-1	-1	-1	0.399612
Capapp	-1	-1	-1	0.41166	-1	0.394275	-1	-1	-1	-1	-1	-1	-1	-1	-1	-1	-1	-1	-1	-1	-1	-1	-1	-1	-1	-1	-1	-1	-1	0.718115	-1	-1	-1	-1	-1	-1	0	-1	-1	-1	-1	-1	-1	-1	-1	-1	-1	-1	0.492589
Cppapp	-1	-1	-1	0.41166	-1	0.394275	-1	-1	-1	-1	-1	-1	-1	-1	-1	-1	-1	-1	-1	-1	-1	-1	-1	-1	-1	-1	-1	-1	-1	0.718115	-1	-1	-1	-1	-1	-1	0	-1	-1	-1	-1	-1	-1	-1	-1	-1	-1	-1	0.492589
Capappa	-1	-1	-1	0.541824	-1	0.408504	-1	-1	-1	-1	-1	-1	-1	-1	-1	-1	-1	-1	-1	-1	-1	-1	-1	-1	-1	-1	-1	-1	-1	0.699545	-1	-1	-1	-1	-1	-1	-1	-1	-1	-1	-1	-1	0.702103	-1	-1	-1	-1	-1	0.463751
Capappp	-1	-1	-1	0.541824	-1	0.408504	-1	-1	-1	-1	-1	-1	-1	-1	-1	-1	-1	-1	-1	-1	-1	-1	-1	-1	-1	-1	-1	-1	-1	0.699545	-1	-1	-1	-1	-1	-1	-1	-1	-1	-1	-1	-1	0.702103	-1	-1	-1	-1	-1	0.463751
Cppappa	-1	-1	-1	0.541824	-1	0.408504	-1	-1	-1	-1	-1	-1	-1	-1	-1	-1	-1	-1	-1	-1	-1	-1	-1	-1	-1	-1	-1	-1	-1	0.699545	-1	-1	-1	-1	-1	-1	-1	-1	-1	-1	-1	-1	0.702103	-1	-1	-1	-1	-1	0.463751
Cppappp	-1	-1	-1	0.541824	-1	0.408504	-1	-1	-1	-1	-1	-1	-1	-1	-1	-1	-1	-1	-1	-1	-1	-1	-1	-1	-1	-1	-1	-1	-1	0.699545	-1	-1	-1	-1	-1	-1	-1	-1	-1	-1	-1	-1	0.702103	-1	-1	-1	-1	-1	0.463751
Capp	-1	-1	0.708716	0	0.565832	0.594211	-1	-1	-1	-1	-1	-1	-1	-1	-1	-1	-1	-1	-1	-1	-1	-1	0.662738	-1	-1	-1	-1	-1	-1	0.709523	-1	-1	-1	-1	-1	-1	0	-1	-1	-1	-1	-1	-1	-1	-1	-1	-1	-1	0.639842
Cppp	-1	-1	0.708716	0	0.565832	0.594211	-1	-1	-1	-1	-1	-1	-1	-1	-1	-1	-1	-1	-1	-1	-1	-1	0.662738	-1	-1	-1	-1	-1	-1	0.709523	-1	-1	-1	-1	-1	-1	0	-1	-1	-1	-1	-1	-1	-1	-1	-1	-1	-1	0.639842
Cappa	-1	-1	0.631236	0	0.60169	-1	-1	-1	-1	-1	-1	-1	-1	-1	-1	-1	-1	-1	-1	-1	-1	-1	-1	-1	-1	-1	-1	-1	-1	0.747825	-1	-1	-1	-1	-1	-1	0.413471	-1	-1	-1	-1	-1	-1	-1	-1	-1	-1	-1	0.570648
Cpppa	-1	-1	0.631236	0	0.60169	-1	-1	-1	-1	-1	-1	-1	-1	-1	-1	-1	-1	-1	-1	-1	-1	-1	-1	-1	-1	-1	-1	-1	-1	0.747825	-1	-1	-1	-1	-1	-1	0.413471	-1	-1	-1	-1	-1	-1	-1	-1	-1	-1	-1	0.570648
Cappaa	-1	-1	-1	0.54529	-1	-1	-1	-1	-1	-1	-1	-1	-1	-1	-1	-1	-1	-1	-1	-1	-1	-1	-1	-1	-1	-1	-1	-1	-1	0.711613	-1	-1	-1	-1	-1	-1	0.332233	-1	-1	-1	-1	0	-1	-1	-1	-1	-1	-1	0.481335
Cpppaa	-1	-1	-1	0.54529	-1	-1	-1	-1	-1	-1	-1	-1	-1	-1	-1	-1	-1	-1	-1	-1	-1	-1	-1	-1	-1	-1	-1	-1	-1	0.711613	-1	-1	-1	-1	-1	-1	0.332233	-1	-1	-1	-1	0	-1	-1	-1	-1	-1	-1	0.481335
Cappaaa	-1	-1	-1	0.569537	-1	-1	-1	-1	-1	-1	-1	-1	-1	-1	-1	-1	-1	-1	-1	-1	-1	-1	-1	-1	-1	-1	-1	-1	-1	0.702173	-1	-1	-1	-1	-1	-1	-1	-1	-1	-1	-1	-1	-1	-1	-1	-1	-1	-1	0.435462
Cappaap	-1	-1	-1	0.569537	-1	-1	-1	-1	-1	-1	-1	-1	-1	-1	-1	-1	-1	-1	-1	-1	-1	-1	-1	-1	-1	-1	-1	-1	-1	0.702173	-1	-1	-1	-1	-1	-1	-1	-1	-1	-1	-1	-1	-1	-1	-1	-1	-1	-1	0.435462
Cpppaaa	-1	-1	-1	0.569537	-1	-1	-1	-1	-1	-1	-1	-1	-1	-1	-1	-1	-1	-1	-1	-1	-1	-1	-1	-1	-1	-1	-1	-1	-1	0.702173	-1	-1	-1	-1	-1	-1	-1	-1	-1	-1	-1	-1	-1	-1	-1	-1	-1	-1	0.435462
Cpppaap	-1	-1	-1	0.569537	-1	-1	-1	-1	-1	-1	-1	-1	-1	-1	-1	-1	-1	-1	-1	-1	-1	-1	-1	-1	-1	-1	-1	-1	-1	0.702173	-1	-1	-1	-1	-1	-1	-1	-1	-1	-1	-1	-1	-1	-1	-1	-1	-1	-1	0.435462
Cappap	-1	-1	0.606038	0.421877	-1	-1	-1	-1	-1	-1	-1	0.395176	-1	-1	-1	-1	-1	-1	-1	-1	-1	-1	-1	-1	-1	-1	-1	-1	-1	0.697096	-1	-1	-1	-1	-1	-1	-1	-1	-1	-1	-1	-1	-1	-1	-1	-1	-1	-1	0.54014
Cpppap	-1	-1	0.606038	0.421877	-1	-1	-1	-1	-1	-1	-1	0.395176	-1	-1	-1	-1	-1	-1	-1	-1	-1	-1	-1	-1	-1	-1	-1	-1	-1	0.697096	-1	-1	-1	-1	-1	-1	-1	-1	-1	-1	-1	-1	-1	-1	-1	-1	-1	-1	0.54014
Cappapa	-1	-1	-1	0.510598	-1	-1	-1	-1	-1	-1	-1	-1	-1	-1	-1	-1	-1	-1	-1	-1	-1	-1	-1	-1	-1	-1	-1	-1	-1	0.607086	-1	-1	-1	-1	-1	-1	-1	-1	-1	-1	-1	-1	-1	-1	-1	-1	-1	-1	0.481318
Cappapp	-1	-1	-1	0.510598	-1	-1	-1	-1	-1	-1	-1	-1	-1	-1	-1	-1	-1	-1	-1	-1	-1	-1	-1	-1	-1	-1	-1	-1	-1	0.607086	-1	-1	-1	-1	-1	-1	-1	-1	-1	-1	-1	-1	-1	-1	-1	-1	-1	-1	0.481318
Cpppapa	-1	-1	-1	0.510598	-1	-1	-1	-1	-1	-1	-1	-1	-1	-1	-1	-1	-1	-1	-1	-1	-1	-1	-1	-1	-1	-1	-1	-1	-1	0.607086	-1	-1	-1	-1	-1	-1	-1	-1	-1	-1	-1	-1	-1	-1	-1	-1	-1	-1	0.481318
Cpppapp	-1	-1	-1	0.510598	-1	-1	-1	-1	-1	-1	-1	-1	-1	-1	-1	-1	-1	-1	-1	-1	-1	-1	-1	-1	-1	-1	-1	-1	-1	0.607086	-1	-1	-1	-1	-1	-1	-1	-1	-1	-1	-1	-1	-1	-1	-1	-1	-1	-1	0.481318
Cappp	-1	-1	0.585475	0	0.620997	0.481236	-1	-1	-1	-1	-1	-1	-1	-1	-1	-1	-1	-1	-1	-1	-1	-1	-1	-1	-1	-1	-1	-1	-1	0.765144	-1	-1	-1	-1	-1	-1	-1	-1	-1	-1	-1	-1	-1	-1	-1	-1	-1	-1	0.57406
Cpppp	-1	-1	0.585475	0	0.620997	0.481236	-1	-1	-1	-1	-1	-1	-1	-1	-1	-1	-1	-1	-1	-1	-1	-1	-1	-1	-1	-1	-1	-1	-1	0.765144	-1	-1	-1	-1	-1	-1	-1	-1	-1	-1	-1	-1	-1	-1	-1	-1	-1	-1	0.57406
Capppa	-1	-1	-1	0	-1	0.509999	-1	-1	-1	-1	-1	-1	-1	-1	-1	-1	-1	-1	-1	-1	-1	-1	-1	-1	-1	-1	-1	-1	-1	0.711129	-1	-1	-1	-1	-1	-1	0	-1	-1	-1	-1	-1	-1	-1	-1	-1	-1	-1	0.465507
Cppppa	-1	-1	-1	0	-1	0.509999	-1	-1	-1	-1	-1	-1	-1	-1	-1	-1	-1	-1	-1	-1	-1	-1	-1	-1	-1	-1	-1	-1	-1	0.711129	-1	-1	-1	-1	-1	-1	0	-1	-1	-1	-1	-1	-1	-1	-1	-1	-1	-1	0.465507
Capppaa	0.639195	-1	-1	0.532534	-1	-1	-1	-1	-1	-1	-1	-1	-1	-1	-1	-1	-1	-1	-1	-1	-1	-1	-1	-1	-1	-1	-1	-1	-1	0.715038	-1	-1	-1	-1	-1	-1	0	-1	-1	-1	-1	0	-1	-1	-1	-1	-1	-1	0.486706
Capppap	0.639195	-1	-1	0.532534	-1	-1	-1	-1	-1	-1	-1	-1	-1	-1	-1	-1	-1	-1	-1	-1	-1	-1	-1	-1	-1	-1	-1	-1	-1	0.715038	-1	-1	-1	-1	-1	-1	0	-1	-1	-1	-1	0	-1	-1	-1	-1	-1	-1	0.486706
Cppppaa	0.639195	-1	-1	0.532534	-1	-1	-1	-1	-1	-1	-1	-1	-1	-1	-1	-1	-1	-1	-1	-1	-1	-1	-1	-1	-1	-1	-1	-1	-1	0.715038	-1	-1	-1	-1	-1	-1	0	-1	-1	-1	-1	0	-1	-1	-1	-1	-1	-1	0.486706
Cppppap	0.639195	-1	-1	0.532534	-1	-1	-1	-1	-1	-1	-1	-1	-1	-1	-1	-1	-1	-1	-1	-1	-1	-1	-1	-1	-1	-1	-1	-1	-1	0.715038	-1	-1	-1	-1	-1	-1	0	-1	-1	-1	-1	0	-1	-1	-1	-1	-1	-1	0.486706
Capppp	-1	-1	-1	0	0.570919	-1	-1	-1	0.602572	-1	-1	-1	-1	-1	-1	-1	-1	-1	-1	-1	-1	-1	-1	-1	-1	-1	-1	-1	-1	0.694977	-1	-1	-1	-1	-1	-1	0.327316	-1	-1	-1	-1	-1	-1	-1	-1	-1	-1	-1	0.491176
Cppppp	-1	-1	-1	0	0.570919	-1	-1	-1	0.602572	-1	-1	-1	-1	-1	-1	-1	-1	-1	-1	-1	-1	-1	-1	-1	-1	-1	-1	-1	-1	0.694977	-1	-1	-1	-1	-1	-1	0.327316	-1	-1	-1	-1	-1	-1	-1	-1	-1	-1	-1	0.491176
Cappppd	-1	-1	-1	0.482237	-1	0.504448	-1	-1	-1	-1	-1	-1	-1	0.719201	-1	-1	-1	-1	-1	-1	-1	-1	0.479006	-1	-1	-1	-1	-1	-1	0.644298	-1	-1	-1	-1	-1	-1	-1	-1	-1	-1	-1	0	-1	-1	-1	-1	-1	-1	0.50153
Cappppv	-1	-1	-1	0.482237	-1	0.504448	-1	-1	-1	-1	-1	-1	-1	0.719201	-1	-1	-1	-1	-1	-1	-1	-1	0.479006	-1	-1	-1	-1	-1	-1	0.644298	-1	-1	-1	-1	-1	-1	-1	-1	-1	-1	-1	0	-1	-1	-1	-1	-1	-1	0.50153
Cpppppd	-1	-1	-1	0.482237	-1	0.504448	-1	-1	-1	-1	-1	-1	-1	0.719201	-1	-1	-1	-1	-1	-1	-1	-1	0.479006	-1	-1	-1	-1	-1	-1	0.644298	-1	-1	-1	-1	-1	-1	-1	-1	-1	-1	-1	0	-1	-1	-1	-1	-1	-1	0.50153
Cpppppv	-1	-1	-1	0.482237	-1	0.504448	-1	-1	-1	-1	-1	-1	-1	0.719201	-1	-1	-1	-1	-1	-1	-1	-1	0.479006	-1	-1	-1	-1	-1	-1	0.644298	-1	-1	-1	-1	-1	-1	-1	-1	-1	-1	-1	0	-1	-1	-1	-1	-1	-1	0.50153
Da	-1	0	0.714614	-1	0	0.537142	-1	-1	-1	-1	-1	-1	-1	-1	-1	-1	-1	-1	-1	-1	-1	-1	0.713401	-1	-1	-1	-1	-1	-1	0	-1	-1	-1	-1	-1	-1	0	-1	-1	-1	-1	-1	-1	-1	-1	-1	-1	-1	0.643072
Dp	-1	0	0.714614	-1	0	0.537142	-1	-1	-1	-1	-1	-1	-1	-1	-1	-1	-1	-1	-1	-1	-1	-1	0.713401	-1	-1	-1	-1	-1	-1	0	-1	-1	-1	-1	-1	-1	0	-1	-1	-1	-1	-1	-1	-1	-1	-1	-1	-1	0.643072
Daa	-1	-1	0.64782	0	0.63282	0.525484	-1	-1	-1	-1	-1	-1	-1	-1	-1	-1	-1	-1	-1	-1	-1	-1	-1	-1	-1	-1	-1	-1	-1	0.644719	-1	-1	-1	-1	-1	-1	0.437417	-1	-1	-1	-1	-1	-1	-1	-1	-1	-1	-1	0.571707
Dpa	-1	-1	0.64782	0	0.63282	0.525484	-1	-1	-1	-1	-1	-1	-1	-1	-1	-1	-1	-1	-1	-1	-1	-1	-1	-1	-1	-1	-1	-1	-1	0.644719	-1	-1	-1	-1	-1	-1	0.437417	-1	-1	-1	-1	-1	-1	-1	-1	-1	-1	-1	0.571707
Daaap	-1	-1	0	0.595825	-1	0.373367	-1	-1	-1	-1	0.68717	0.599	-1	-1	-1	-1	-1	-1	-1	-1	-1	-1	-1	-1	-1	-1	-1	-1	-1	0.749913	-1	-1	-1	-1	-1	-1	-1	-1	-1	0.551998	-1	0	-1	-1	-1	-1	-1	-1	0.458284
Dpaap	-1	-1	0	0.595825	-1	0.373367	-1	-1	-1	-1	0.68717	0.599	-1	-1	-1	-1	-1	-1	-1	-1	-1	-1	-1	-1	-1	-1	-1	-1	-1	0.749913	-1	-1	-1	-1	-1	-1	-1	-1	-1	0.551998	-1	0	-1	-1	-1	-1	-1	-1	0.458284
Daap	-1	-1	0.665808	0	-1	0.506849	-1	-1	-1	-1	-1	-1	-1	-1	-1	-1	-1	-1	-1	-1	-1	-1	-1	-1	-1	-1	-1	-1	-1	0.685316	-1	-1	-1	-1	-1	-1	0.307591	-1	-1	-1	-1	-1	-1	-1	-1	-1	-1	-1	0.539187
Dpap	-1	-1	0.665808	0	-1	0.506849	-1	-1	-1	-1	-1	-1	-1	-1	-1	-1	-1	-1	-1	-1	-1	-1	-1	-1	-1	-1	-1	-1	-1	0.685316	-1	-1	-1	-1	-1	-1	0.307591	-1	-1	-1	-1	-1	-1	-1	-1	-1	-1	-1	0.539187
Daapa	-1	-1	-1	0	0.682306	-1	-1	-1	-1	-1	-1	-1	-1	-1	-1	-1	-1	-1	-1	-1	0.524318	-1	-1	-1	-1	-1	-1	-1	-1	-1	-1	-1	-1	-1	-1	-1	-1	-1	-1	-1	-1	-1	-1	-1	-1	-1	-1	-1	0.387246
Dpapa	-1	-1	-1	0	0.682306	-1	-1	-1	-1	-1	-1	-1	-1	-1	-1	-1	-1	-1	-1	-1	0.524318	-1	-1	-1	-1	-1	-1	-1	-1	-1	-1	-1	-1	-1	-1	-1	-1	-1	-1	-1	-1	-1	-1	-1	-1	-1	-1	-1	0.387246
Daapp	-1	-1	0.316092	0.505727	-1	-1	-1	-1	-1	-1	-1	0.615356	-1	-1	-1	-1	-1	-1	-1	-1	-1	-1	-1	-1	-1	-1	-1	-1	-1	0.705185	-1	-1	-1	-1	-1	-1	-1	-1	-1	-1	-1	-1	-1	-1	-1	-1	-1	-1	0.490323
Dpapp	-1	-1	0.316092	0.505727	-1	-1	-1	-1	-1	-1	-1	0.615356	-1	-1	-1	-1	-1	-1	-1	-1	-1	-1	-1	-1	-1	-1	-1	-1	-1	0.705185	-1	-1	-1	-1	-1	-1	-1	-1	-1	-1	-1	-1	-1	-1	-1	-1	-1	-1	0.490323
Dap	-1	-1	0.726373	0	-1	-1	-1	-1	-1	-1	-1	0.643883	-1	-1	-1	-1	-1	-1	-1	-1	-1	-1	-1	-1	-1	-1	-1	-1	-1	0.707245	-1	-1	-1	-1	-1	-1	0	-1	-1	-1	-1	-1	-1	-1	-1	-1	-1	-1	0.624976
Dpp	-1	-1	0.726373	0	-1	-1	-1	-1	-1	-1	-1	0.643883	-1	-1	-1	-1	-1	-1	-1	-1	-1	-1	-1	-1	-1	-1	-1	-1	-1	0.707245	-1	-1	-1	-1	-1	-1	0	-1	-1	-1	-1	-1	-1	-1	-1	-1	-1	-1	0.624976
Dapap	-1	-1	-1	0.562475	-1	0.474911	-1	-1	-1	-1	-1	0.592347	-1	-1	-1	-1	-1	-1	-1	-1	-1	-1	-1	-1	-1	-1	-1	-1	-1	0.762029	-1	-1	-1	-1	-1	-1	-1	-1	-1	-1	-1	0	-1	-1	-1	-1	-1	-1	0.508942
Dppap	-1	-1	-1	0.562475	-1	0.474911	-1	-1	-1	-1	-1	0.592347	-1	-1	-1	-1	-1	-1	-1	-1	-1	-1	-1	-1	-1	-1	-1	-1	-1	0.762029	-1	-1	-1	-1	-1	-1	-1	-1	-1	-1	-1	0	-1	-1	-1	-1	-1	-1	0.508942
Dapp	-1	-1	0.647867	0	-1	-1	-1	-1	-1	-1	-1	0.68016	-1	-1	-1	-1	-1	-1	-1	-1	-1	-1	-1	-1	-1	-1	-1	-1	-1	0.687146	-1	-1	-1	-1	-1	-1	0.446285	-1	-1	-1	-1	-1	-1	-1	-1	-1	-1	-1	0.608598
Dppp	-1	-1	0.647867	0	-1	-1	-1	-1	-1	-1	-1	0.68016	-1	-1	-1	-1	-1	-1	-1	-1	-1	-1	-1	-1	-1	-1	-1	-1	-1	0.687146	-1	-1	-1	-1	-1	-1	0.446285	-1	-1	-1	-1	-1	-1	-1	-1	-1	-1	-1	0.608598
Dappa	-1	-1	-1	0.453763	-1	-1	-1	-1	-1	-1	-1	0.61391	-1	-1	-1	-1	-1	-1	-1	-1	-1	-1	-1	-1	-1	-1	-1	-1	-1	0.731985	-1	-1	-1	-1	-1	-1	0	-1	-1	-1	-1	-1	-1	-1	-1	-1	-1	-1	0.510014
Dpppa	-1	-1	-1	0.453763	-1	-1	-1	-1	-1	-1	-1	0.61391	-1	-1	-1	-1	-1	-1	-1	-1	-1	-1	-1	-1	-1	-1	-1	-1	-1	0.731985	-1	-1	-1	-1	-1	-1	0	-1	-1	-1	-1	-1	-1	-1	-1	-1	-1	-1	0.510014
Dappaa	-1	-1	0.451743	0.44072	-1	0.492905	-1	-1	-1	-1	-1	0.54166	-1	-1	-1	-1	-1	-1	-1	-1	-1	-1	-1	-1	-1	-1	-1	-1	-1	0.706537	-1	-1	-1	-1	-1	-1	-1	-1	-1	-1	-1	-1	-1	-1	-1	-1	-1	-1	0.471413
Dappap	-1	-1	0.451743	0.44072	-1	0.492905	-1	-1	-1	-1	-1	0.54166	-1	-1	-1	-1	-1	-1	-1	-1	-1	-1	-1	-1	-1	-1	-1	-1	-1	0.706537	-1	-1	-1	-1	-1	-1	-1	-1	-1	-1	-1	-1	-1	-1	-1	-1	-1	-1	0.471413
Dpppaa	-1	-1	0.451743	0.44072	-1	0.492905	-1	-1	-1	-1	-1	0.54166	-1	-1	-1	-1	-1	-1	-1	-1	-1	-1	-1	-1	-1	-1	-1	-1	-1	0.706537	-1	-1	-1	-1	-1	-1	-1	-1	-1	-1	-1	-1	-1	-1	-1	-1	-1	-1	0.471413
Dpppap	-1	-1	0.451743	0.44072	-1	0.492905	-1	-1	-1	-1	-1	0.54166	-1	-1	-1	-1	-1	-1	-1	-1	-1	-1	-1	-1	-1	-1	-1	-1	-1	0.706537	-1	-1	-1	-1	-1	-1	-1	-1	-1	-1	-1	-1	-1	-1	-1	-1	-1	-1	0.471413
Dappp	-1	-1	0.544052	0.229902	-1	-1	-1	-1	-1	-1	-1	0.649478	-1	-1	-1	-1	-1	-1	-1	-1	-1	-1	-1	-1	-1	-1	-1	-1	-1	0.693004	-1	-1	-1	-1	-1	-1	-1	-1	-1	-1	-1	-1	-1	-1	-1	-1	-1	-1	0.510591
Dpppp	-1	-1	0.544052	0.229902	-1	-1	-1	-1	-1	-1	-1	0.649478	-1	-1	-1	-1	-1	-1	-1	-1	-1	-1	-1	-1	-1	-1	-1	-1	-1	0.693004	-1	-1	-1	-1	-1	-1	-1	-1	-1	-1	-1	-1	-1	-1	-1	-1	-1	-1	0.510591
Dapppa	-1	-1	-1	0.478932	-1	0.511044	-1	-1	0.682292	-1	-1	0.490052	-1	-1	-1	-1	-1	-1	-1	-1	-1	-1	-1	-1	-1	-1	-1	-1	-1	-1	-1	-1	-1	-1	-1	-1	-1	-1	-1	-1	-1	0.42513	-1	-1	-1	-1	-1	-1	0.460315
Dapppp	-1	-1	-1	0.478932	-1	0.511044	-1	-1	0.682292	-1	-1	0.490052	-1	-1	-1	-1	-1	-1	-1	-1	-1	-1	-1	-1	-1	-1	-1	-1	-1	-1	-1	-1	-1	-1	-1	-1	-1	-1	-1	-1	-1	0.42513	-1	-1	-1	-1	-1	-1	0.460315
Dppppa	-1	-1	-1	0.478932	-1	0.511044	-1	-1	0.682292	-1	-1	0.490052	-1	-1	-1	-1	-1	-1	-1	-1	-1	-1	-1	-1	-1	-1	-1	-1	-1	-1	-1	-1	-1	-1	-1	-1	-1	-1	-1	-1	-1	0.42513	-1	-1	-1	-1	-1	-1	0.460315
Dppppp	-1	-1	-1	0.478932	-1	0.511044	-1	-1	0.682292	-1	-1	0.490052	-1	-1	-1	-1	-1	-1	-1	-1	-1	-1	-1	-1	-1	-1	-1	-1	-1	-1	-1	-1	-1	-1	-1	-1	-1	-1	-1	-1	-1	0.42513	-1	-1	-1	-1	-1	-1	0.460315
Daaa	-1	-1	0.651149	0	-1	-1	-1	-1	-1	-1	-1	0.59304	-1	-1	-1	-1	-1	-1	-1	-1	-1	-1	-1	-1	-1	-1	-1	-1	-1	0.710374	-1	-1	-1	-1	-1	-1	0	-1	-1	-1	-1	-1	-1	-1	-1	-1	-1	-1	0.551922
Dapa	-1	-1	0.651149	0	-1	-1	-1	-1	-1	-1	-1	0.59304	-1	-1	-1	-1	-1	-1	-1	-1	-1	-1	-1	-1	-1	-1	-1	-1	-1	0.710374	-1	-1	-1	-1	-1	-1	0	-1	-1	-1	-1	-1	-1	-1	-1	-1	-1	-1	0.551922
Dpaa	-1	-1	0.651149	0	-1	-1	-1	-1	-1	-1	-1	0.59304	-1	-1	-1	-1	-1	-1	-1	-1	-1	-1	-1	-1	-1	-1	-1	-1	-1	0.710374	-1	-1	-1	-1	-1	-1	0	-1	-1	-1	-1	-1	-1	-1	-1	-1	-1	-1	0.551922
Dppa	-1	-1	0.651149	0	-1	-1	-1	-1	-1	-1	-1	0.59304	-1	-1	-1	-1	-1	-1	-1	-1	-1	-1	-1	-1	-1	-1	-1	-1	-1	0.710374	-1	-1	-1	-1	-1	-1	0	-1	-1	-1	-1	-1	-1	-1	-1	-1	-1	-1	0.551922
Daaaa	-1	-1	-1	0.592441	-1	0.49654	-1	-1	-1	-1	-1	0.587892	-1	-1	-1	-1	-1	-1	-1	-1	-1	-1	-1	-1	-1	-1	-1	-1	-1	0.774145	-1	-1	-1	-1	-1	-1	-1	-1	-1	-1	-1	-1	-1	-1	-1	-1	-1	-1	0.498389
Dapaa	-1	-1	-1	0.592441	-1	0.49654	-1	-1	-1	-1	-1	0.587892	-1	-1	-1	-1	-1	-1	-1	-1	-1	-1	-1	-1	-1	-1	-1	-1	-1	0.774145	-1	-1	-1	-1	-1	-1	-1	-1	-1	-1	-1	-1	-1	-1	-1	-1	-1	-1	0.498389
Dpaaa	-1	-1	-1	0.592441	-1	0.49654	-1	-1	-1	-1	-1	0.587892	-1	-1	-1	-1	-1	-1	-1	-1	-1	-1	-1	-1	-1	-1	-1	-1	-1	0.774145	-1	-1	-1	-1	-1	-1	-1	-1	-1	-1	-1	-1	-1	-1	-1	-1	-1	-1	0.498389
Dppaa	-1	-1	-1	0.592441	-1	0.49654	-1	-1	-1	-1	-1	0.587892	-1	-1	-1	-1	-1	-1	-1	-1	-1	-1	-1	-1	-1	-1	-1	-1	-1	0.774145	-1	-1	-1	-1	-1	-1	-1	-1	-1	-1	-1	-1	-1	-1	-1	-1	-1	-1	0.498389
Ealaa	-1	-1	0.567228	-1	-1	0.483405	-1	-1	-1	-1	-1	-1	-1	-1	-1	-1	-1	-1	-1	-1	-1	-1	-1	-1	-1	-1	-1	-1	-1	0.990741	-1	-1	-1	-1	-1	-1	-1	0.534797	-1	1	-1	0	0.55051	-1	-1	-1	-1	-1	0
Earaa	-1	-1	0.567228	-1	-1	0.483405	-1	-1	-1	-1	-1	-1	-1	-1	-1	-1	-1	-1	-1	-1	-1	-1	-1	-1	-1	-1	-1	-1	-1	0.990741	-1	-1	-1	-1	-1	-1	-1	0.534797	-1	1	-1	0	0.55051	-1	-1	-1	-1	-1	0
Ealap	-1	-1	0.483424	-1	0	0.466897	-1	-1	-1	-1	-1	-1	-1	-1	-1	-1	-1	-1	-1	-1	-1	-1	-1	-1	-1	-1	-1	-1	-1	0.998694	-1	-1	-1	-1	-1	-1	-1	0.604835	-1	1	-1	0	0.487298	-1	-1	-1	-1	-1	0.454647
Earap	-1	-1	0.483424	-1	0	0.466897	-1	-1	-1	-1	-1	-1	-1	-1	-1	-1	-1	-1	-1	-1	-1	-1	-1	-1	-1	-1	-1	-1	-1	0.998694	-1	-1	-1	-1	-1	-1	-1	0.604835	-1	1	-1	0	0.487298	-1	-1	-1	-1	-1	0.454647
Ealpa	-1	-1	0.483424	-1	0	0.466897	-1	-1	-1	-1	-1	-1	-1	-1	-1	-1	-1	-1	-1	-1	-1	-1	-1	-1	-1	-1	-1	-1	-1	0.998694	-1	-1	-1	-1	-1	-1	-1	0.604835	-1	1	-1	0	0.487298	-1	-1	-1	-1	-1	0.454647
Earpa	-1	-1	0.483424	-1	0	0.466897	-1	-1	-1	-1	-1	-1	-1	-1	-1	-1	-1	-1	-1	-1	-1	-1	-1	-1	-1	-1	-1	-1	-1	0.998694	-1	-1	-1	-1	-1	-1	-1	0.604835	-1	1	-1	0	0.487298	-1	-1	-1	-1	-1	0.454647
Ealpp	-1	-1	-1	-1	0	0.442132	-1	-1	-1	-1	-1	-1	-1	-1	-1	-1	-1	-1	-1	-1	-1	-1	-1	-1	-1	-1	-1	-1	-1	0.991899	-1	-1	-1	-1	-1	-1	-1	-1	-1	1	-1	0	0	-1	-1	-1	-1	-1	0.484729
Earpp	-1	-1	-1	-1	0	0.442132	-1	-1	-1	-1	-1	-1	-1	-1	-1	-1	-1	-1	-1	-1	-1	-1	-1	-1	-1	-1	-1	-1	-1	0.991899	-1	-1	-1	-1	-1	-1	-1	-1	-1	1	-1	0	0	-1	-1	-1	-1	-1	0.484729
Eplap	-1	-1	-1	-1	0	0.442132	-1	-1	-1	-1	-1	-1	-1	-1	-1	-1	-1	-1	-1	-1	-1	-1	-1	-1	-1	-1	-1	-1	-1	0.991899	-1	-1	-1	-1	-1	-1	-1	-1	-1	1	-1	0	0	-1	-1	-1	-1	-1	0.484729
Eprap	-1	-1	-1	-1	0	0.442132	-1	-1	-1	-1	-1	-1	-1	-1	-1	-1	-1	-1	-1	-1	-1	-1	-1	-1	-1	-1	-1	-1	-1	0.991899	-1	-1	-1	-1	-1	-1	-1	-1	-1	1	-1	0	0	-1	-1	-1	-1	-1	0.484729
Eplaa	-1	-1	-1	-1	-1	0.412115	-1	-1	-1	-1	-1	-1	-1	-1	-1	-1	-1	-1	-1	-1	-1	-1	-1	-1	-1	-1	-1	-1	-1	0.993092	-1	-1	-1	-1	-1	-1	-1	0.577352	-1	1	-1	0	0.523851	-1	-1	-1	-1	-1	0.429979
Epraa	-1	-1	-1	-1	-1	0.412115	-1	-1	-1	-1	-1	-1	-1	-1	-1	-1	-1	-1	-1	-1	-1	-1	-1	-1	-1	-1	-1	-1	-1	0.993092	-1	-1	-1	-1	-1	-1	-1	0.577352	-1	1	-1	0	0.523851	-1	-1	-1	-1	-1	0.429979
Eplpa	-1	-1	0.554992	-1	0	0.463927	-1	-1	-1	-1	-1	-1	-1	-1	-1	-1	-1	-1	-1	-1	-1	-1	-1	-1	-1	-1	-1	-1	-1	0.979922	-1	-1	-1	-1	-1	-1	-1	-1	-1	1	-1	0	0	-1	-1	-1	-1	-1	0
Eprpa	-1	-1	0.554992	-1	0	0.463927	-1	-1	-1	-1	-1	-1	-1	-1	-1	-1	-1	-1	-1	-1	-1	-1	-1	-1	-1	-1	-1	-1	-1	0.979922	-1	-1	-1	-1	-1	-1	-1	-1	-1	1	-1	0	0	-1	-1	-1	-1	-1	0
Eplpp	-1	-1	0.551292	-1	0	0.5312	-1	-1	-1	-1	-1	-1	-1	-1	-1	-1	-1	-1	-1	-1	-1	-1	-1	-1	-1	-1	-1	-1	-1	0.989656	-1	-1	-1	-1	-1	-1	-1	-1	-1	1	-1	0	-1	-1	-1	-1	-1	-1	0.528033
Eprpp	-1	-1	0.551292	-1	0	0.5312	-1	-1	-1	-1	-1	-1	-1	-1	-1	-1	-1	-1	-1	-1	-1	-1	-1	-1	-1	-1	-1	-1	-1	0.989656	-1	-1	-1	-1	-1	-1	-1	-1	-1	1	-1	0	-1	-1	-1	-1	-1	-1	0.528033
Eal	0.558869	-1	0.745719	-1	-1	0.627773	-1	-1	-1	-1	-1	-1	-1	-1	-1	-1	-1	-1	-1	-1	-1	-1	-1	-1	-1	-1	-1	-1	-1	0.916722	-1	-1	-1	-1	-1	-1	-1	0.598021	-1	0.935567	1	-1	-1	0.601265	-1	-1	-1	-1	0.611709
Ear	0.558869	-1	0.745719	-1	-1	0.627773	-1	-1	-1	-1	-1	-1	-1	-1	-1	-1	-1	-1	-1	-1	-1	-1	-1	-1	-1	-1	-1	-1	-1	0.916722	-1	-1	-1	-1	-1	-1	-1	0.598021	-1	0.935567	1	-1	-1	0.601265	-1	-1	-1	-1	0.611709
Epl	0.558869	-1	0.745719	-1	-1	0.627773	-1	-1	-1	-1	-1	-1	-1	-1	-1	-1	-1	-1	-1	-1	-1	-1	-1	-1	-1	-1	-1	-1	-1	0.916722	-1	-1	-1	-1	-1	-1	-1	0.598021	-1	0.935567	1	-1	-1	0.601265	-1	-1	-1	-1	0.611709
Epr	0.558869	-1	0.745719	-1	-1	0.627773	-1	-1	-1	-1	-1	-1	-1	-1	-1	-1	-1	-1	-1	-1	-1	-1	-1	-1	-1	-1	-1	-1	-1	0.916722	-1	-1	-1	-1	-1	-1	-1	0.598021	-1	0.935567	1	-1	-1	0.601265	-1	-1	-1	-1	0.611709
Eala	0.561407	-1	0.682064	-1	-1	0.643764	-1	-1	-1	-1	-1	-1	-1	-1	-1	-1	-1	-1	-1	-1	-1	-1	-1	-1	-1	-1	-1	-1	-1	0.999842	-1	-1	-1	-1	-1	-1	-1	0.743324	-1	1	-1	0	0.519449	-1	-1	-1	-1	-1	0.605824
Ealp	0.561407	-1	0.682064	-1	-1	0.643764	-1	-1	-1	-1	-1	-1	-1	-1	-1	-1	-1	-1	-1	-1	-1	-1	-1	-1	-1	-1	-1	-1	-1	0.999842	-1	-1	-1	-1	-1	-1	-1	0.743324	-1	1	-1	0	0.519449	-1	-1	-1	-1	-1	0.605824
Eara	0.561407	-1	0.682064	-1	-1	0.643764	-1	-1	-1	-1	-1	-1	-1	-1	-1	-1	-1	-1	-1	-1	-1	-1	-1	-1	-1	-1	-1	-1	-1	0.999842	-1	-1	-1	-1	-1	-1	-1	0.743324	-1	1	-1	0	0.519449	-1	-1	-1	-1	-1	0.605824
Earp	0.561407	-1	0.682064	-1	-1	0.643764	-1	-1	-1	-1	-1	-1	-1	-1	-1	-1	-1	-1	-1	-1	-1	-1	-1	-1	-1	-1	-1	-1	-1	0.999842	-1	-1	-1	-1	-1	-1	-1	0.743324	-1	1	-1	0	0.519449	-1	-1	-1	-1	-1	0.605824
Epla	0.561407	-1	0.682064	-1	-1	0.643764	-1	-1	-1	-1	-1	-1	-1	-1	-1	-1	-1	-1	-1	-1	-1	-1	-1	-1	-1	-1	-1	-1	-1	0.999842	-1	-1	-1	-1	-1	-1	-1	0.743324	-1	1	-1	0	0.519449	-1	-1	-1	-1	-1	0.605824
Eplp	0.561407	-1	0.682064	-1	-1	0.643764	-1	-1	-1	-1	-1	-1	-1	-1	-1	-1	-1	-1	-1	-1	-1	-1	-1	-1	-1	-1	-1	-1	-1	0.999842	-1	-1	-1	-1	-1	-1	-1	0.743324	-1	1	-1	0	0.519449	-1	-1	-1	-1	-1	0.605824
Epra	0.561407	-1	0.682064	-1	-1	0.643764	-1	-1	-1	-1	-1	-1	-1	-1	-1	-1	-1	-1	-1	-1	-1	-1	-1	-1	-1	-1	-1	-1	-1	0.999842	-1	-1	-1	-1	-1	-1	-1	0.743324	-1	1	-1	0	0.519449	-1	-1	-1	-1	-1	0.605824
Eprp	0.561407	-1	0.682064	-1	-1	0.643764	-1	-1	-1	-1	-1	-1	-1	-1	-1	-1	-1	-1	-1	-1	-1	-1	-1	-1	-1	-1	-1	-1	-1	0.999842	-1	-1	-1	-1	-1	-1	-1	0.743324	-1	1	-1	0	0.519449	-1	-1	-1	-1	-1	0.605824
MSaaaaa	-1	-1	0.73723	-1	0.701386	0.53684	-1	-1	-1	-1	-1	-1	-1	-1	-1	-1	-1	-1	-1	-1	0.576357	-1	-1	-1	-1	-1	-1	-1	-1	0.612352	-1	-1	-1	-1	-1	-1	0.424319	-1	-1	-1	-1	-1	-1	-1	-1	-1	-1	-1	0.628418
MSaaaaaa	-1	-1	-1	0	-1	0.515201	-1	-1	-1	-1	-1	-1	-1	-1	-1	-1	-1	-1	-1	-1	0.642329	-1	0.651245	-1	-1	-1	-1	-1	-1	-1	-1	-1	-1	-1	-1	-1	0.516104	-1	-1	-1	-1	-1	-1	-1	-1	-1	-1	-1	0.445953
MSaaaaaal	-1	-1	0.722453	0.656096	-1	0.689753	-1	-1	-1	-1	-1	-1	-1	-1	-1	-1	-1	-1	-1	-1	-1	-1	-1	-1	-1	0.993347	-1	-1	-1	-1	-1	-1	-1	-1	-1	-1	-1	0.560506	-1	-1	-1	-1	-1	-1	-1	-1	-1	-1	0.608189
MSaaaaaar	-1	-1	0.722453	0.656096	-1	0.689753	-1	-1	-1	-1	-1	-1	-1	-1	-1	-1	-1	-1	-1	-1	-1	-1	-1	-1	-1	0.993347	-1	-1	-1	-1	-1	-1	-1	-1	-1	-1	-1	0.560506	-1	-1	-1	-1	-1	-1	-1	-1	-1	-1	0.608189
MSapaaaad	-1	-1	0.722453	0.656096	-1	0.689753	-1	-1	-1	-1	-1	-1	-1	-1	-1	-1	-1	-1	-1	-1	-1	-1	-1	-1	-1	0.993347	-1	-1	-1	-1	-1	-1	-1	-1	-1	-1	-1	0.560506	-1	-1	-1	-1	-1	-1	-1	-1	-1	-1	0.608189
MSapaaaav	-1	-1	0.722453	0.656096	-1	0.689753	-1	-1	-1	-1	-1	-1	-1	-1	-1	-1	-1	-1	-1	-1	-1	-1	-1	-1	-1	0.993347	-1	-1	-1	-1	-1	-1	-1	-1	-1	-1	-1	0.560506	-1	-1	-1	-1	-1	-1	-1	-1	-1	-1	0.608189
MSppaaaad	-1	-1	0.722453	0.656096	-1	0.689753	-1	-1	-1	-1	-1	-1	-1	-1	-1	-1	-1	-1	-1	-1	-1	-1	-1	-1	-1	0.993347	-1	-1	-1	-1	-1	-1	-1	-1	-1	-1	-1	0.560506	-1	-1	-1	-1	-1	-1	-1	-1	-1	-1	0.608189
MSppaaaav	-1	-1	0.722453	0.656096	-1	0.689753	-1	-1	-1	-1	-1	-1	-1	-1	-1	-1	-1	-1	-1	-1	-1	-1	-1	-1	-1	0.993347	-1	-1	-1	-1	-1	-1	-1	-1	-1	-1	-1	0.560506	-1	-1	-1	-1	-1	-1	-1	-1	-1	-1	0.608189
MSaaaaap	-1	-1	-1	-1	-1	0.470457	-1	-1	-1	-1	-1	0.757351	-1	-1	-1	-1	-1	-1	-1	-1	-1	-1	0.642041	-1	-1	-1	-1	-1	-1	0.609103	-1	-1	-1	-1	-1	-1	-1	-1	-1	-1	-1	-1	-1	-1	-1	-1	-1	-1	0.585927
MSaaaaapa	-1	-1	0.599356	-1	-1	0.560192	-1	-1	-1	-1	-1	-1	-1	-1	-1	-1	-1	-1	-1	-1	0.571435	-1	-1	-1	-1	-1	-1	-1	-1	-1	-1	-1	-1	0.751614	-1	-1	0.394135	-1	-1	-1	-1	-1	-1	-1	-1	-1	-1	-1	0.544411
MSaaaap	-1	-1	0.71719	-1	0.699625	0.547946	-1	-1	-1	-1	-1	0.722803	-1	-1	-1	-1	-1	-1	-1	-1	-1	-1	-1	-1	-1	-1	-1	-1	-1	0.61258	-1	-1	-1	-1	-1	-1	0.443122	-1	-1	-1	-1	-1	-1	-1	-1	-1	-1	-1	0.576148
MSaaaapa	-1	-1	0.650599	-1	-1	0.401914	-1	-1	-1	-1	-1	0.569561	-1	-1	-1	-1	-1	-1	-1	-1	-1	-1	0.654408	-1	-1	-1	-1	-1	-1	0.637452	-1	-1	-1	-1	-1	-1	0	-1	-1	-1	-1	-1	-1	-1	-1	-1	-1	-1	0.598045
MSaaaapp	-1	-1	0.61705	0	-1	0.456268	-1	-1	-1	-1	-1	0.689919	-1	-1	-1	-1	-1	-1	-1	-1	-1	-1	0.584503	-1	-1	-1	-1	-1	-1	-1	-1	-1	-1	-1	-1	-1	-1	-1	-1	-1	-1	-1	-1	-1	-1	-1	-1	-1	0.524406
MSaaaappp	-1	-1	0.53836	0.109602	-1	0.600588	-1	-1	-1	-1	-1	-1	-1	-1	0.473231	-1	1	-1	-1	-1	-1	-1	-1	-1	-1	-1	-1	-1	-1	-1	-1	-1	-1	-1	-1	-1	-1	-1	-1	-1	-1	0.375841	-1	-1	-1	-1	-1	-1	0.405922
MSaapaapp	-1	-1	0.53836	0.109602	-1	0.600588	-1	-1	-1	-1	-1	-1	-1	-1	0.473231	-1	1	-1	-1	-1	-1	-1	-1	-1	-1	-1	-1	-1	-1	-1	-1	-1	-1	-1	-1	-1	-1	-1	-1	-1	-1	0.375841	-1	-1	-1	-1	-1	-1	0.405922
MSpapaapp	-1	-1	0.53836	0.109602	-1	0.600588	-1	-1	-1	-1	-1	-1	-1	-1	0.473231	-1	1	-1	-1	-1	-1	-1	-1	-1	-1	-1	-1	-1	-1	-1	-1	-1	-1	-1	-1	-1	-1	-1	-1	-1	-1	0.375841	-1	-1	-1	-1	-1	-1	0.405922
MSaaapaa	-1	-1	0.742296	0.398046	-1	0.516179	-1	-1	-1	-1	-1	-1	-1	-1	-1	-1	0.957765	-1	-1	-1	0.557095	-1	-1	-1	-1	-1	-1	-1	-1	-1	-1	-1	-1	-1	-1	-1	0.367691	-1	-1	-1	-1	-1	-1	-1	-1	-1	-1	-1	0.599285
MSaaapapp	-1	-1	-1	-1	0.803371	0.747888	-1	-1	-1	0.474784	-1	-1	-1	0.746932	-1	-1	-1	-1	-1	-1	-1	-1	-1	-1	-1	-1	-1	-1	-1	-1	-1	-1	-1	-1	-1	0.803076	0.317129	-1	-1	-1	0.596717	-1	-1	-1	-1	-1	-1	-1	0.503427
MSaaapp	-1	-1	-1	0.463308	0.681827	0.540799	-1	-1	-1	-1	-1	-1	-1	-1	-1	-1	-1	-1	-1	-1	-1	0.587922	-1	-1	-1	-1	-1	-1	-1	0.585899	-1	-1	-1	-1	-1	-1	-1	-1	-1	-1	-1	-1	-1	-1	-1	-1	-1	-1	-1
MSaaappp	-1	-1	0.60872	-1	-1	0.573928	-1	-1	-1	-1	-1	-1	-1	-1	-1	-1	-1	-1	-1	-1	-1	-1	-1	-1	-1	-1	-1	-1	-1	0.466061	-1	-1	-1	-1	-1	-1	0.55928	-1	-1	-1	-1	-1	-1	-1	-1	-1	-1	-1	0.585024
MSaappa	-1	-1	0.644453	-1	0.759084	-1	-1	-1	0.590555	-1	-1	-1	-1	-1	-1	-1	-1	-1	-1	-1	-1	-1	-1	-1	-1	-1	-1	-1	-1	0.685172	-1	-1	-1	-1	-1	-1	0.563374	-1	-1	-1	-1	-1	-1	-1	-1	-1	-1	-1	0.444886
MSapaap	-1	0.318036	0.705451	-1	0.68239	0.542077	-1	-1	0.49531	-1	-1	-1	-1	-1	0.49595	-1	-1	-1	-1	-1	-1	-1	-1	-1	-1	-1	-1	-1	-1	0.644259	-1	-1	-1	-1	-1	-1	0.41723	-1	-1	-1	-1	-1	-1	-1	-1	-1	-1	-1	0.637401
MSapaapp	-1	0.818307	-1	-1	0.695533	0.67622	-1	-1	-1	0.704317	0.60012	-1	-1	-1	-1	-1	-1	-1	-1	-1	-1	-1	-1	-1	-1	-1	-1	-1	-1	0.733562	-1	-1	-1	-1	-1	-1	0.369499	0.931652	-1	-1	-1	-1	-1	-1	-1	-1	-1	-1	0.679014
MSappaaa	-1	-1	-1	0.621958	-1	0.590064	-1	-1	-1	-1	-1	-1	-1	-1	0.631579	-1	-1	-1	-1	-1	-1	-1	-1	-1	-1	0.858841	-1	-1	-1	-1	-1	-1	-1	-1	-1	0.783695	-1	-1	-1	-1	-1	-1	0.635702	-1	-1	-1	-1	-1	0.365503
MSpaaaa	-1	-1	-1	-1	-1	0.54752	-1	-1	0.384328	-1	-1	-1	-1	-1	-1	-1	-1	-1	-1	-1	0.574651	-1	-1	-1	-1	-1	-1	-1	-1	0.594595	-1	-1	-1	-1	-1	-1	0	-1	-1	-1	-1	-1	-1	-1	-1	-1	-1	-1	0.622495
MSpaaaaa	-1	-1	0.582682	0	-1	0.402141	-1	-1	-1	-1	-1	-1	-1	-1	-1	-1	-1	-1	-1	-1	0.584143	-1	-1	-1	-1	0.601888	-1	-1	-1	0.707735	-1	-1	-1	-1	-1	-1	0	-1	-1	-1	-1	-1	-1	-1	-1	-1	-1	-1	0.473548
MSpaaaap	-1	-1	0.699236	0	-1	0.593119	-1	-1	-1	-1	-1	0.624145	-1	-1	-1	-1	-1	-1	-1	-1	-1	-1	-1	-1	-1	-1	-1	-1	-1	-1	-1	-1	-1	-1	-1	-1	-1	-1	-1	-1	-1	-1	-1	-1	-1	-1	-1	-1	0.510534
MSpaaap	-1	-1	0.714055	-1	-1	0.411095	-1	-1	-1	-1	-1	0.64554	-1	-1	-1	-1	-1	-1	-1	-1	-1	-1	-1	-1	-1	-1	-1	-1	-1	0.581683	-1	-1	-1	-1	-1	-1	-1	-1	-1	-1	-1	-1	-1	-1	-1	-1	-1	-1	0.571568
MSpaaapa	-1	-1	0.528394	-1	-1	0.43923	-1	-1	-1	-1	-1	-1	-1	-1	-1	-1	-1	-1	-1	-1	0.474166	-1	0.596067	-1	-1	-1	-1	-1	-1	0.69614	-1	0.620835	-1	-1	-1	-1	-1	-1	-1	-1	-1	0	-1	-1	-1	-1	-1	-1	0.537383
MSpaaapp	-1	-1	0.66362	0	-1	0.515191	-1	-1	-1	-1	-1	-1	-1	-1	-1	-1	-1	-1	-1	-1	-1	-1	-1	-1	-1	-1	-1	-1	-1	0.603141	-1	-1	-1	-1	-1	-1	0	-1	-1	-1	-1	-1	0.572604	-1	-1	-1	-1	-1	0.547446
MSpaaappp	-1	-1	0.512355	0.578625	-1	0.719769	-1	-1	-1	-1	-1	-1	-1	-1	0.791118	-1	-1	-1	-1	-1	-1	-1	-1	-1	-1	-1	-1	-1	-1	-1	-1	-1	-1	-1	-1	-1	0.432776	-1	-1	-1	-1	0.570763	-1	-1	-1	-1	-1	-1	0.546083
MSaapappa	-1	-1	0.512355	0.578625	-1	0.719769	-1	-1	-1	-1	-1	-1	-1	-1	0.791118	-1	-1	-1	-1	-1	-1	-1	-1	-1	-1	-1	-1	-1	-1	-1	-1	-1	-1	-1	-1	-1	0.432776	-1	-1	-1	-1	0.570763	-1	-1	-1	-1	-1	-1	0.546083
MSpapappa	-1	-1	0.512355	0.578625	-1	0.719769	-1	-1	-1	-1	-1	-1	-1	-1	0.791118	-1	-1	-1	-1	-1	-1	-1	-1	-1	-1	-1	-1	-1	-1	-1	-1	-1	-1	-1	-1	-1	0.432776	-1	-1	-1	-1	0.570763	-1	-1	-1	-1	-1	-1	0.546083
MSpaapaa	-1	-1	0.643219	-1	-1	0.481433	-1	-1	0.423849	-1	-1	-1	-1	-1	-1	-1	-1	-1	-1	-1	0.677648	-1	-1	-1	-1	0.560409	-1	-1	-1	-1	-1	0.402574	-1	-1	-1	-1	0	-1	-1	-1	-1	-1	-1	-1	-1	-1	-1	-1	0.557524
MSpappa	-1	-1	-1	0.445653	-1	-1	-1	-1	-1	-1	-1	-1	-1	-1	-1	-1	-1	-1	-1	-1	-1	-1	0.665855	-1	-1	-1	-1	-1	-1	0.689203	-1	-1	-1	-1	-1	-1	0.534089	-1	-1	-1	-1	-1	-1	-1	-1	-1	-1	-1	0.455231
MSpappaa	-1	-1	0.623949	0.415178	-1	-1	-1	-1	-1	-1	-1	-1	-1	-1	-1	-1	-1	-1	-1	-1	-1	-1	0.689329	-1	-1	-1	-1	-1	-1	0.773985	-1	-1	-1	-1	-1	-1	-1	-1	-1	-1	-1	-1	-1	-1	-1	-1	-1	-1	0.566296
MSpappap	-1	-1	0.623949	0.415178	-1	-1	-1	-1	-1	-1	-1	-1	-1	-1	-1	-1	-1	-1	-1	-1	-1	-1	0.689329	-1	-1	-1	-1	-1	-1	0.773985	-1	-1	-1	-1	-1	-1	-1	-1	-1	-1	-1	-1	-1	-1	-1	-1	-1	-1	0.566296
MSppaap	-1	0.245172	-1	-1	-1	0.525288	-1	-1	-1	-1	-1	-1	-1	-1	-1	-1	-1	-1	-1	-1	-1	-1	0.636913	-1	-1	-1	-1	-1	-1	0.636155	-1	-1	-1	-1	-1	-1	0.394718	-1	-1	-1	-1	-1	-1	-1	-1	-1	-1	-1	0.57725
MSpppaaa	-1	-1	-1	0.641549	-1	0.651002	-1	-1	0.893917	0.361347	-1	-1	-1	0.789867	-1	-1	-1	-1	-1	-1	-1	-1	-1	-1	-1	-1	-1	-1	-1	-1	-1	-1	-1	-1	-1	-1	-1	-1	-1	-1	-1	-1	-1	-1	-1	-1	-1	-1	0.465258
MSa	0.81952	-1	0.781159	-1	0.580177	-1	-1	-1	-1	-1	-1	-1	-1	-1	-1	-1	-1	-1	-1	-1	-1	-1	0.812973	0.53259	-1	-1	-1	0	-1	0	-1	-1	-1	-1	-1	-1	0.719366	-1	-1	-1	-1	-1	-1	0.424579	-1	-1	-1	-1	0.718974
MSp	0.81952	-1	0.781159	-1	0.580177	-1	-1	-1	-1	-1	-1	-1	-1	-1	-1	-1	-1	-1	-1	-1	-1	-1	0.812973	0.53259	-1	-1	-1	0	-1	0	-1	-1	-1	-1	-1	-1	0.719366	-1	-1	-1	-1	-1	-1	0.424579	-1	-1	-1	-1	0.718974
MSaa	-1	-1	0.825233	-1	0.582494	0.614413	-1	-1	-1	-1	-1	-1	-1	-1	-1	-1	-1	-1	-1	-1	-1	-1	0.713789	-1	-1	-1	-1	0.473019	-1	0	-1	-1	-1	-1	-1	-1	-1	-1	-1	-1	-1	-1	-1	0.777029	-1	-1	-1	-1	0.680129
MSpa	-1	-1	0.825233	-1	0.582494	0.614413	-1	-1	-1	-1	-1	-1	-1	-1	-1	-1	-1	-1	-1	-1	-1	-1	0.713789	-1	-1	-1	-1	0.473019	-1	0	-1	-1	-1	-1	-1	-1	-1	-1	-1	-1	-1	-1	-1	0.777029	-1	-1	-1	-1	0.680129
MSaaa	-1	0.404549	0.76926	-1	-1	0.572233	-1	-1	0.582908	-1	-1	-1	-1	-1	-1	-1	-1	-1	-1	-1	-1	-1	0.686703	-1	-1	-1	-1	0	-1	0.494992	-1	-1	-1	-1	-1	-1	0.397897	-1	-1	-1	-1	-1	-1	-1	-1	-1	-1	-1	0.583513
MSpaa	-1	0.404549	0.76926	-1	-1	0.572233	-1	-1	0.582908	-1	-1	-1	-1	-1	-1	-1	-1	-1	-1	-1	-1	-1	0.686703	-1	-1	-1	-1	0	-1	0.494992	-1	-1	-1	-1	-1	-1	0.397897	-1	-1	-1	-1	-1	-1	-1	-1	-1	-1	-1	0.583513
MSaaaa	-1	-1	0.761302	-1	-1	-1	-1	-1	-1	-1	-1	-1	-1	-1	-1	-1	-1	-1	-1	-1	0.558549	-1	-1	-1	-1	-1	-1	0.294048	-1	0.59208	-1	-1	-1	-1	-1	-1	0.43897	-1	-1	-1	-1	-1	-1	-1	-1	-1	-1	-1	0.605552
MSpaaa	-1	-1	0.761302	-1	-1	-1	-1	-1	-1	-1	-1	-1	-1	-1	-1	-1	-1	-1	-1	-1	0.558549	-1	-1	-1	-1	-1	-1	0.294048	-1	0.59208	-1	-1	-1	-1	-1	-1	0.43897	-1	-1	-1	-1	-1	-1	-1	-1	-1	-1	-1	0.605552
MSaaap	-1	-1	0.749607	-1	0.675571	0.743166	-1	-1	-1	-1	-1	-1	-1	-1	-1	-1	-1	-1	-1	-1	0.501874	0.539919	-1	-1	-1	-1	-1	-1	-1	0.573916	-1	-1	-1	-1	-1	-1	0.467904	-1	-1	-1	-1	-1	-1	-1	-1	-1	-1	-1	0.597433
MSpaap	-1	-1	0.749607	-1	0.675571	0.743166	-1	-1	-1	-1	-1	-1	-1	-1	-1	-1	-1	-1	-1	-1	0.501874	0.539919	-1	-1	-1	-1	-1	-1	-1	0.573916	-1	-1	-1	-1	-1	-1	0.467904	-1	-1	-1	-1	-1	-1	-1	-1	-1	-1	-1	0.597433
MSaaapa	-1	-1	-1	-1	0.714466	0.562041	-1	-1	-1	-1	-1	-1	-1	-1	-1	-1	0.62803	-1	-1	-1	0.556216	0.57005	-1	-1	-1	-1	-1	-1	-1	0.658335	-1	-1	-1	-1	-1	-1	-1	-1	-1	-1	-1	-1	-1	-1	-1	-1	-1	-1	0.641175
MSpaapa	-1	-1	-1	-1	0.714466	0.562041	-1	-1	-1	-1	-1	-1	-1	-1	-1	-1	0.62803	-1	-1	-1	0.556216	0.57005	-1	-1	-1	-1	-1	-1	-1	0.658335	-1	-1	-1	-1	-1	-1	-1	-1	-1	-1	-1	-1	-1	-1	-1	-1	-1	-1	0.641175
MSaaapap	-1	-1	0.686307	-1	-1	0.400994	-1	-1	-1	-1	-1	-1	-1	-1	-1	-1	-1	-1	-1	-1	-1	-1	-1	-1	-1	-1	-1	-1	-1	-1	-1	-1	-1	-1	-1	-1	0.42322	-1	-1	-1	-1	-1	-1	-1	-1	-1	-1	-1	0.544349
MSpaapap	-1	-1	0.686307	-1	-1	0.400994	-1	-1	-1	-1	-1	-1	-1	-1	-1	-1	-1	-1	-1	-1	-1	-1	-1	-1	-1	-1	-1	-1	-1	-1	-1	-1	-1	-1	-1	-1	0.42322	-1	-1	-1	-1	-1	-1	-1	-1	-1	-1	-1	0.544349
MSaaapapa	-1	-1	0.691849	0.409156	-1	0.641821	-1	-1	-1	-1	-1	-1	-1	-1	-1	-1	-1	-1	-1	-1	-1	-1	-1	-1	-1	-1	-1	-1	-1	-1	-1	-1	-1	-1	-1	-1	-1	0.520811	-1	-1	-1	0.434407	-1	-1	-1	-1	-1	-1	0.498066
MSpaapapa	-1	-1	0.691849	0.409156	-1	0.641821	-1	-1	-1	-1	-1	-1	-1	-1	-1	-1	-1	-1	-1	-1	-1	-1	-1	-1	-1	-1	-1	-1	-1	-1	-1	-1	-1	-1	-1	-1	-1	0.520811	-1	-1	-1	0.434407	-1	-1	-1	-1	-1	-1	0.498066
ABalpappapp	-1	-1	0.691849	0.409156	-1	0.641821	-1	-1	-1	-1	-1	-1	-1	-1	-1	-1	-1	-1	-1	-1	-1	-1	-1	-1	-1	-1	-1	-1	-1	-1	-1	-1	-1	-1	-1	-1	-1	0.520811	-1	-1	-1	0.434407	-1	-1	-1	-1	-1	-1	0.498066
MSaap	-1	-1	0.773022	-1	0.604707	0.579937	-1	-1	-1	-1	-1	-1	-1	-1	-1	-1	-1	-1	-1	-1	-1	0.521027	0.71222	-1	-1	-1	-1	0.333524	-1	0	-1	-1	-1	-1	-1	-1	-1	-1	-1	-1	-1	-1	-1	-1	-1	-1	-1	-1	0.664609
MSpap	-1	-1	0.773022	-1	0.604707	0.579937	-1	-1	-1	-1	-1	-1	-1	-1	-1	-1	-1	-1	-1	-1	-1	0.521027	0.71222	-1	-1	-1	-1	0.333524	-1	0	-1	-1	-1	-1	-1	-1	-1	-1	-1	-1	-1	-1	-1	-1	-1	-1	-1	-1	0.664609
MSaapa	0.528214	-1	0.774277	-1	0.617066	0.623502	-1	-1	-1	-1	-1	-1	-1	-1	-1	-1	-1	-1	-1	-1	0.553276	-1	0.639856	-1	-1	-1	-1	0.461702	-1	0	-1	-1	-1	-1	-1	0.641433	0.476956	-1	-1	-1	-1	-1	-1	-1	-1	-1	-1	-1	0.641878
MSpapa	0.528214	-1	0.774277	-1	0.617066	0.623502	-1	-1	-1	-1	-1	-1	-1	-1	-1	-1	-1	-1	-1	-1	0.553276	-1	0.639856	-1	-1	-1	-1	0.461702	-1	0	-1	-1	-1	-1	-1	0.641433	0.476956	-1	-1	-1	-1	-1	-1	-1	-1	-1	-1	-1	0.641878
MSaapaa	-1	-1	0.779869	-1	0.693553	0.590304	-1	-1	-1	-1	-1	-1	-1	-1	-1	-1	-1	-1	-1	-1	0.579617	-1	-1	-1	-1	-1	-1	-1	-1	0.569116	-1	-1	-1	-1	-1	0.537473	0.428405	-1	-1	-1	-1	0	-1	-1	-1	-1	-1	-1	0.605765
MSpapaa	-1	-1	0.779869	-1	0.693553	0.590304	-1	-1	-1	-1	-1	-1	-1	-1	-1	-1	-1	-1	-1	-1	0.579617	-1	-1	-1	-1	-1	-1	-1	-1	0.569116	-1	-1	-1	-1	-1	0.537473	0.428405	-1	-1	-1	-1	0	-1	-1	-1	-1	-1	-1	0.605765
MSaapaaa	-1	-1	0.736059	0.383861	-1	0.537759	-1	-1	-1	-1	-1	0.68003	-1	-1	-1	-1	1	-1	-1	-1	-1	-1	-1	-1	-1	-1	-1	-1	-1	-1	-1	-1	-1	-1	-1	-1	0	-1	-1	-1	-1	0.362648	-1	-1	-1	-1	-1	-1	0.560539
MSpapaaa	-1	-1	0.736059	0.383861	-1	0.537759	-1	-1	-1	-1	-1	0.68003	-1	-1	-1	-1	1	-1	-1	-1	-1	-1	-1	-1	-1	-1	-1	-1	-1	-1	-1	-1	-1	-1	-1	-1	0	-1	-1	-1	-1	0.362648	-1	-1	-1	-1	-1	-1	0.560539
MSaapaap	-1	-1	0.724578	-1	-1	0.570822	-1	-1	-1	-1	-1	0.771945	-1	-1	-1	-1	-1	-1	-1	-1	-1	-1	-1	-1	-1	-1	-1	-1	-1	0.549414	-1	-1	-1	-1	-1	-1	0	-1	-1	-1	-1	-1	-1	-1	-1	-1	-1	-1	0.594946
MSpapaap	-1	-1	0.724578	-1	-1	0.570822	-1	-1	-1	-1	-1	0.771945	-1	-1	-1	-1	-1	-1	-1	-1	-1	-1	-1	-1	-1	-1	-1	-1	-1	0.549414	-1	-1	-1	-1	-1	-1	0	-1	-1	-1	-1	-1	-1	-1	-1	-1	-1	-1	0.594946
MSaapaapa	-1	-1	0.619201	-1	-1	0.446466	-1	-1	-1	-1	-1	-1	-1	-1	-1	-1	-1	-1	-1	-1	-1	-1	-1	-1	-1	-1	-1	-1	-1	0	-1	-1	-1	-1	-1	-1	0	-1	-1	-1	-1	-1	-1	-1	-1	-1	-1	-1	0.56956
MSpapaapa	-1	-1	0.619201	-1	-1	0.446466	-1	-1	-1	-1	-1	-1	-1	-1	-1	-1	-1	-1	-1	-1	-1	-1	-1	-1	-1	-1	-1	-1	-1	0	-1	-1	-1	-1	-1	-1	0	-1	-1	-1	-1	-1	-1	-1	-1	-1	-1	-1	0.56956
MSaapap	-1	-1	0.722706	-1	0.672245	-1	-1	-1	-1	-1	-1	-1	-1	-1	-1	-1	-1	-1	-1	-1	-1	-1	-1	-1	-1	-1	-1	-1	-1	0.525001	-1	-1	-1	0.775106	-1	0.545982	0	-1	-1	-1	-1	-1	-1	-1	-1	-1	-1	-1	0.61495
MSpapap	-1	-1	0.722706	-1	0.672245	-1	-1	-1	-1	-1	-1	-1	-1	-1	-1	-1	-1	-1	-1	-1	-1	-1	-1	-1	-1	-1	-1	-1	-1	0.525001	-1	-1	-1	0.775106	-1	0.545982	0	-1	-1	-1	-1	-1	-1	-1	-1	-1	-1	-1	0.61495
MSaapapa	-1	-1	-1	-1	-1	-1	-1	-1	-1	-1	-1	-1	-1	-1	-1	-1	-1	-1	-1	-1	-1	-1	-1	-1	-1	-1	-1	-1	0.868697	0.556223	-1	0.620122	-1	-1	-1	0.697656	0	-1	-1	-1	-1	-1	-1	-1	-1	-1	-1	0.7129	0.566487
MSpapapa	-1	-1	-1	-1	-1	-1	-1	-1	-1	-1	-1	-1	-1	-1	-1	-1	-1	-1	-1	-1	-1	-1	-1	-1	-1	-1	-1	-1	0.868697	0.556223	-1	0.620122	-1	-1	-1	0.697656	0	-1	-1	-1	-1	-1	-1	-1	-1	-1	-1	0.7129	0.566487
MSaapapaa	-1	-1	-1	-1	-1	0.675617	-1	-1	-1	-1	-1	-1	-1	-1	-1	-1	-1	-1	-1	-1	-1	-1	-1	-1	-1	-1	-1	-1	0.886588	0	-1	0	-1	-1	-1	0.769767	-1	-1	-1	0.582617	-1	-1	-1	-1	-1	-1	-1	0.803244	0.629065
MSpapapaa	-1	-1	-1	-1	-1	0.675617	-1	-1	-1	-1	-1	-1	-1	-1	-1	-1	-1	-1	-1	-1	-1	-1	-1	-1	-1	-1	-1	-1	0.886588	0	-1	0	-1	-1	-1	0.769767	-1	-1	-1	0.582617	-1	-1	-1	-1	-1	-1	-1	0.803244	0.629065
MSaapapp	-1	-1	0.675312	-1	-1	0.570252	-1	-1	-1	-1	-1	-1	-1	-1	-1	-1	-1	-1	-1	-1	-1	-1	-1	-1	-1	-1	-1	-1	-1	0.542825	-1	-1	-1	-1	-1	-1	0	-1	-1	-1	-1	-1	-1	-1	-1	-1	-1	0.544624	0.595389
MSpapapp	-1	-1	0.675312	-1	-1	0.570252	-1	-1	-1	-1	-1	-1	-1	-1	-1	-1	-1	-1	-1	-1	-1	-1	-1	-1	-1	-1	-1	-1	-1	0.542825	-1	-1	-1	-1	-1	-1	0	-1	-1	-1	-1	-1	-1	-1	-1	-1	-1	0.544624	0.595389
MSaapp	-1	-1	0.790193	0.546396	0.696452	0.54638	-1	-1	-1	-1	-1	-1	-1	-1	-1	-1	-1	-1	-1	-1	-1	0.616662	-1	-1	-1	-1	-1	0	-1	0.550184	-1	-1	-1	-1	-1	-1	0.548792	-1	-1	-1	-1	-1	0.608867	-1	-1	-1	-1	-1	0.604604
MSpapp	-1	-1	0.790193	0.546396	0.696452	0.54638	-1	-1	-1	-1	-1	-1	-1	-1	-1	-1	-1	-1	-1	-1	-1	0.616662	-1	-1	-1	-1	-1	0	-1	0.550184	-1	-1	-1	-1	-1	-1	0.548792	-1	-1	-1	-1	-1	0.608867	-1	-1	-1	-1	-1	0.604604
MSaappp	-1	-1	0.712174	0.305354	0.72868	-1	-1	-1	-1	-1	-1	0.720631	-1	-1	-1	-1	-1	-1	-1	-1	-1	-1	0.705472	-1	-1	-1	-1	-1	-1	0.695206	-1	-1	-1	-1	0.367749	-1	0.472062	-1	-1	-1	-1	-1	-1	-1	-1	-1	-1	-1	0.600179
MSpappp	-1	-1	0.712174	0.305354	0.72868	-1	-1	-1	-1	-1	-1	0.720631	-1	-1	-1	-1	-1	-1	-1	-1	-1	-1	0.705472	-1	-1	-1	-1	-1	-1	0.695206	-1	-1	-1	-1	0.367749	-1	0.472062	-1	-1	-1	-1	-1	-1	-1	-1	-1	-1	-1	0.600179
MSaapppa	-1	-1	-1	0.476615	-1	-1	-1	-1	-1	-1	-1	0.589775	-1	-1	-1	-1	-1	-1	-1	-1	-1	-1	-1	-1	-1	-1	-1	-1	-1	0.712937	-1	-1	-1	-1	-1	-1	-1	-1	-1	-1	0	-1	-1	-1	-1	-1	-1	0.473816	0.513672
MSpapppa	-1	-1	-1	0.476615	-1	-1	-1	-1	-1	-1	-1	0.589775	-1	-1	-1	-1	-1	-1	-1	-1	-1	-1	-1	-1	-1	-1	-1	-1	-1	0.712937	-1	-1	-1	-1	-1	-1	-1	-1	-1	-1	0	-1	-1	-1	-1	-1	-1	0.473816	0.513672
MSaapppaa	-1	-1	-1	0	-1	0.511803	-1	-1	0.777235	-1	-1	0.543821	-1	-1	-1	-1	-1	-1	-1	-1	-1	-1	-1	-1	-1	-1	-1	-1	-1	0.699395	-1	-1	-1	-1	-1	-1	-1	-1	-1	-1	-1	-1	-1	-1	-1	-1	-1	0	0.492991
MSaapppap	-1	-1	-1	0	-1	0.511803	-1	-1	0.777235	-1	-1	0.543821	-1	-1	-1	-1	-1	-1	-1	-1	-1	-1	-1	-1	-1	-1	-1	-1	-1	0.699395	-1	-1	-1	-1	-1	-1	-1	-1	-1	-1	-1	-1	-1	-1	-1	-1	-1	0	0.492991
MSpapppaa	-1	-1	-1	0	-1	0.511803	-1	-1	0.777235	-1	-1	0.543821	-1	-1	-1	-1	-1	-1	-1	-1	-1	-1	-1	-1	-1	-1	-1	-1	-1	0.699395	-1	-1	-1	-1	-1	-1	-1	-1	-1	-1	-1	-1	-1	-1	-1	-1	-1	0	0.492991
MSpapppap	-1	-1	-1	0	-1	0.511803	-1	-1	0.777235	-1	-1	0.543821	-1	-1	-1	-1	-1	-1	-1	-1	-1	-1	-1	-1	-1	-1	-1	-1	-1	0.699395	-1	-1	-1	-1	-1	-1	-1	-1	-1	-1	-1	-1	-1	-1	-1	-1	-1	0	0.492991
MSaapppp	-1	-1	-1	0.398041	-1	-1	-1	-1	-1	-1	-1	0.530879	-1	-1	-1	-1	-1	-1	-1	-1	-1	-1	-1	-1	-1	-1	-1	-1	-1	0.673076	-1	-1	-1	-1	-1	-1	0	-1	-1	-1	-1	-1	-1	-1	-1	-1	-1	-1	0.485644
MSpapppp	-1	-1	-1	0.398041	-1	-1	-1	-1	-1	-1	-1	0.530879	-1	-1	-1	-1	-1	-1	-1	-1	-1	-1	-1	-1	-1	-1	-1	-1	-1	0.673076	-1	-1	-1	-1	-1	-1	0	-1	-1	-1	-1	-1	-1	-1	-1	-1	-1	-1	0.485644
MSaappppa	-1	-1	-1	0.506837	-1	0.480832	-1	-1	-1	-1	-1	0.356099	-1	-1	-1	-1	-1	-1	-1	-1	-1	-1	-1	-1	-1	-1	-1	-1	-1	0.652735	-1	-1	-1	-1	-1	-1	0	-1	-1	-1	-1	-1	-1	-1	-1	-1	-1	-1	0.479392
MSaappppp	-1	-1	-1	0.506837	-1	0.480832	-1	-1	-1	-1	-1	0.356099	-1	-1	-1	-1	-1	-1	-1	-1	-1	-1	-1	-1	-1	-1	-1	-1	-1	0.652735	-1	-1	-1	-1	-1	-1	0	-1	-1	-1	-1	-1	-1	-1	-1	-1	-1	-1	0.479392
MSpappppa	-1	-1	-1	0.506837	-1	0.480832	-1	-1	-1	-1	-1	0.356099	-1	-1	-1	-1	-1	-1	-1	-1	-1	-1	-1	-1	-1	-1	-1	-1	-1	0.652735	-1	-1	-1	-1	-1	-1	0	-1	-1	-1	-1	-1	-1	-1	-1	-1	-1	-1	0.479392
MSpappppp	-1	-1	-1	0.506837	-1	0.480832	-1	-1	-1	-1	-1	0.356099	-1	-1	-1	-1	-1	-1	-1	-1	-1	-1	-1	-1	-1	-1	-1	-1	-1	0.652735	-1	-1	-1	-1	-1	-1	0	-1	-1	-1	-1	-1	-1	-1	-1	-1	-1	-1	0.479392
MSap	0.685084	-1	0.821627	-1	0.599356	-1	-1	-1	-1	-1	-1	-1	-1	-1	-1	-1	-1	-1	-1	-1	-1	-1	0.732521	-1	-1	-1	-1	0	-1	0	-1	-1	-1	-1	-1	-1	0.513821	-1	-1	-1	-1	-1	0.531706	-1	-1	-1	-1	-1	0.705216
MSpp	0.685084	-1	0.821627	-1	0.599356	-1	-1	-1	-1	-1	-1	-1	-1	-1	-1	-1	-1	-1	-1	-1	-1	-1	0.732521	-1	-1	-1	-1	0	-1	0	-1	-1	-1	-1	-1	-1	0.513821	-1	-1	-1	-1	-1	0.531706	-1	-1	-1	-1	-1	0.705216
MSapa	-1	-1	0.743086	-1	0.593035	0.582416	-1	-1	-1	-1	-1	-1	-1	-1	-1	-1	-1	-1	-1	-1	-1	-1	0.725249	-1	-1	-1	-1	0	-1	0.589301	-1	-1	-1	-1	-1	-1	0.342055	-1	-1	-1	-1	-1	-1	-1	-1	-1	-1	-1	0.638411
MSppa	-1	-1	0.743086	-1	0.593035	0.582416	-1	-1	-1	-1	-1	-1	-1	-1	-1	-1	-1	-1	-1	-1	-1	-1	0.725249	-1	-1	-1	-1	0	-1	0.589301	-1	-1	-1	-1	-1	-1	0.342055	-1	-1	-1	-1	-1	-1	-1	-1	-1	-1	-1	0.638411
MSapaa	-1	-1	0.765322	-1	0.682165	0.565849	-1	-1	-1	-1	-1	-1	-1	0	-1	-1	-1	-1	-1	-1	-1	-1	-1	-1	-1	-1	-1	0.256432	-1	0.730794	-1	-1	-1	-1	-1	-1	0.472194	-1	-1	-1	-1	0	-1	-1	-1	-1	-1	-1	0.604644
MSppaa	-1	-1	0.765322	-1	0.682165	0.565849	-1	-1	-1	-1	-1	-1	-1	0	-1	-1	-1	-1	-1	-1	-1	-1	-1	-1	-1	-1	-1	0.256432	-1	0.730794	-1	-1	-1	-1	-1	-1	0.472194	-1	-1	-1	-1	0	-1	-1	-1	-1	-1	-1	0.604644
MSapaaa	-1	-1	0.756329	0.370608	0.67278	0.469924	-1	-1	-1	-1	-1	-1	-1	-1	-1	-1	-1	-1	-1	-1	-1	-1	0.644034	-1	-1	-1	-1	-1	-1	0.58432	-1	-1	-1	-1	-1	-1	0.420061	-1	-1	-1	-1	-1	-1	-1	-1	-1	-1	-1	0.63282
MSppaaa	-1	-1	0.756329	0.370608	0.67278	0.469924	-1	-1	-1	-1	-1	-1	-1	-1	-1	-1	-1	-1	-1	-1	-1	-1	0.644034	-1	-1	-1	-1	-1	-1	0.58432	-1	-1	-1	-1	-1	-1	0.420061	-1	-1	-1	-1	-1	-1	-1	-1	-1	-1	-1	0.63282
MSapaaaa	-1	-1	0.555099	0.487353	0.671706	0.569288	-1	-1	-1	-1	-1	-1	-1	-1	-1	-1	-1	-1	-1	-1	-1	-1	-1	-1	-1	0.737395	-1	-1	-1	0.596572	-1	-1	-1	-1	-1	-1	0.536095	-1	-1	-1	-1	-1	-1	-1	-1	-1	-1	-1	0.496831
MSppaaaa	-1	-1	0.555099	0.487353	0.671706	0.569288	-1	-1	-1	-1	-1	-1	-1	-1	-1	-1	-1	-1	-1	-1	-1	-1	-1	-1	-1	0.737395	-1	-1	-1	0.596572	-1	-1	-1	-1	-1	-1	0.536095	-1	-1	-1	-1	-1	-1	-1	-1	-1	-1	-1	0.496831
MSapaaap	-1	-1	-1	0.436853	-1	0.544253	-1	-1	0.764647	-1	-1	-1	-1	-1	-1	-1	-1	-1	-1	-1	0.635598	-1	-1	-1	-1	-1	-1	-1	-1	0.773489	-1	-1	-1	-1	-1	-1	-1	-1	-1	-1	-1	-1	-1	-1	-1	-1	-1	-1	0.549675
MSppaaap	-1	-1	-1	0.436853	-1	0.544253	-1	-1	0.764647	-1	-1	-1	-1	-1	-1	-1	-1	-1	-1	-1	0.635598	-1	-1	-1	-1	-1	-1	-1	-1	0.773489	-1	-1	-1	-1	-1	-1	-1	-1	-1	-1	-1	-1	-1	-1	-1	-1	-1	-1	0.549675
MSapap	-1	-1	0.768745	-1	-1	-1	-1	-1	-1	-1	-1	-1	-1	-1	-1	-1	-1	-1	-1	-1	-1	-1	0.681808	-1	-1	-1	-1	0.363103	-1	0.729152	-1	-1	-1	-1	-1	-1	-1	-1	-1	-1	-1	-1	-1	-1	-1	-1	-1	-1	0.618937
MSppap	-1	-1	0.768745	-1	-1	-1	-1	-1	-1	-1	-1	-1	-1	-1	-1	-1	-1	-1	-1	-1	-1	-1	0.681808	-1	-1	-1	-1	0.363103	-1	0.729152	-1	-1	-1	-1	-1	-1	-1	-1	-1	-1	-1	-1	-1	-1	-1	-1	-1	-1	0.618937
MSapapa	-1	-1	0.700927	0.268678	0.694165	0.595825	-1	-1	-1	-1	-1	-1	-1	-1	-1	-1	-1	-1	-1	-1	0.567405	-1	-1	-1	-1	-1	-1	-1	-1	0.751383	-1	-1	-1	-1	-1	-1	0.417869	-1	-1	-1	-1	0	-1	-1	-1	-1	-1	-1	0.633781
MSppapa	-1	-1	0.700927	0.268678	0.694165	0.595825	-1	-1	-1	-1	-1	-1	-1	-1	-1	-1	-1	-1	-1	-1	0.567405	-1	-1	-1	-1	-1	-1	-1	-1	0.751383	-1	-1	-1	-1	-1	-1	0.417869	-1	-1	-1	-1	0	-1	-1	-1	-1	-1	-1	0.633781
MSapapaa	-1	-1	-1	0	-1	0.647205	-1	-1	-1	-1	-1	-1	-1	-1	-1	-1	-1	-1	-1	-1	0.627925	-1	-1	-1	-1	-1	-1	-1	-1	0.598633	-1	-1	-1	-1	-1	-1	-1	0	-1	-1	-1	-1	-1	-1	-1	-1	-1	-1	0.525687
MSppapaa	-1	-1	-1	0	-1	0.647205	-1	-1	-1	-1	-1	-1	-1	-1	-1	-1	-1	-1	-1	-1	0.627925	-1	-1	-1	-1	-1	-1	-1	-1	0.598633	-1	-1	-1	-1	-1	-1	-1	0	-1	-1	-1	-1	-1	-1	-1	-1	-1	-1	0.525687
MSapapap	-1	-1	0.600748	0.51792	-1	0.417502	-1	-1	-1	-1	-1	-1	-1	-1	-1	-1	-1	-1	-1	-1	0.652522	-1	-1	-1	-1	-1	-1	-1	-1	0.74631	-1	-1	-1	-1	-1	-1	-1	-1	-1	-1	-1	-1	-1	-1	-1	-1	-1	-1	0.560979
MSppapap	-1	-1	0.600748	0.51792	-1	0.417502	-1	-1	-1	-1	-1	-1	-1	-1	-1	-1	-1	-1	-1	-1	0.652522	-1	-1	-1	-1	-1	-1	-1	-1	0.74631	-1	-1	-1	-1	-1	-1	-1	-1	-1	-1	-1	-1	-1	-1	-1	-1	-1	-1	0.560979
MSapapp	-1	-1	0.723891	0	-1	0.548786	-1	-1	-1	-1	-1	-1	-1	-1	-1	-1	-1	-1	-1	-1	-1	-1	-1	-1	-1	-1	-1	-1	-1	0.732515	-1	-1	-1	-1	-1	-1	0.469975	-1	-1	-1	-1	-1	-1	-1	-1	-1	-1	-1	0.623519
MSppapp	-1	-1	0.723891	0	-1	0.548786	-1	-1	-1	-1	-1	-1	-1	-1	-1	-1	-1	-1	-1	-1	-1	-1	-1	-1	-1	-1	-1	-1	-1	0.732515	-1	-1	-1	-1	-1	-1	0.469975	-1	-1	-1	-1	-1	-1	-1	-1	-1	-1	-1	0.623519
MSapappa	-1	-1	0.60516	0.516131	-1	0.585455	-1	-1	-1	-1	-1	-1	-1	-1	-1	-1	-1	-1	-1	-1	-1	-1	-1	-1	-1	-1	-1	-1	-1	0.758492	-1	-1	-1	-1	-1	-1	-1	-1	-1	-1	-1	-1	-1	-1	-1	-1	-1	-1	0.518054
MSppappa	-1	-1	0.60516	0.516131	-1	0.585455	-1	-1	-1	-1	-1	-1	-1	-1	-1	-1	-1	-1	-1	-1	-1	-1	-1	-1	-1	-1	-1	-1	-1	0.758492	-1	-1	-1	-1	-1	-1	-1	-1	-1	-1	-1	-1	-1	-1	-1	-1	-1	-1	0.518054
MSapappp	-1	-1	0.616839	0	-1	0.484311	-1	-1	-1	-1	-1	-1	-1	-1	0.656019	-1	-1	-1	-1	-1	0.492192	-1	-1	-1	-1	-1	-1	-1	-1	0.748396	-1	-1	-1	-1	-1	-1	-1	-1	-1	-1	-1	-1	-1	-1	-1	-1	-1	-1	0.503661
MSppappp	-1	-1	0.616839	0	-1	0.484311	-1	-1	-1	-1	-1	-1	-1	-1	0.656019	-1	-1	-1	-1	-1	0.492192	-1	-1	-1	-1	-1	-1	-1	-1	0.748396	-1	-1	-1	-1	-1	-1	-1	-1	-1	-1	-1	-1	-1	-1	-1	-1	-1	-1	0.503661
MSapp	-1	-1	0.823187	-1	0.641354	0.505242	-1	-1	-1	-1	-1	-1	-1	-1	-1	-1	-1	-1	-1	-1	-1	-1	0.746251	-1	-1	-1	-1	0	-1	0.674948	-1	-1	-1	-1	-1	-1	0	-1	-1	-1	-1	-1	-1	-1	-1	-1	-1	-1	0.690388
MSppp	-1	-1	0.823187	-1	0.641354	0.505242	-1	-1	-1	-1	-1	-1	-1	-1	-1	-1	-1	-1	-1	-1	-1	-1	0.746251	-1	-1	-1	-1	0	-1	0.674948	-1	-1	-1	-1	-1	-1	0	-1	-1	-1	-1	-1	-1	-1	-1	-1	-1	-1	0.690388
MSappa	-1	-1	0.674446	-1	0.631627	0.590665	-1	-1	-1	-1	-1	-1	-1	-1	-1	-1	-1	-1	-1	-1	-1	-1	0.663276	-1	-1	-1	-1	0.330614	-1	0.656209	-1	-1	-1	-1	-1	-1	0.445939	-1	-1	-1	-1	-1	-1	-1	-1	-1	-1	-1	0.59878
MSpppa	-1	-1	0.674446	-1	0.631627	0.590665	-1	-1	-1	-1	-1	-1	-1	-1	-1	-1	-1	-1	-1	-1	-1	-1	0.663276	-1	-1	-1	-1	0.330614	-1	0.656209	-1	-1	-1	-1	-1	-1	0.445939	-1	-1	-1	-1	-1	-1	-1	-1	-1	-1	-1	0.59878
MSappaa	-1	-1	0.665873	0.329217	0.733487	0.571857	-1	-1	-1	-1	-1	-1	-1	-1	-1	-1	-1	-1	-1	-1	-1	-1	-1	-1	-1	-1	-1	-1	-1	0.682966	-1	-1	-1	-1	-1	-1	0.50607	-1	-1	-1	-1	-1	-1	-1	-1	-1	-1	-1	0.600875
MSpppaa	-1	-1	0.665873	0.329217	0.733487	0.571857	-1	-1	-1	-1	-1	-1	-1	-1	-1	-1	-1	-1	-1	-1	-1	-1	-1	-1	-1	-1	-1	-1	-1	0.682966	-1	-1	-1	-1	-1	-1	0.50607	-1	-1	-1	-1	-1	-1	-1	-1	-1	-1	-1	0.600875
MSappaap	-1	0.960733	0.769879	0.634208	0.923485	-1	-1	-1	0.72882	-1	-1	-1	-1	-1	-1	-1	-1	-1	-1	-1	-1	-1	-1	-1	-1	-1	-1	-1	-1	0.867561	-1	-1	-1	0.800905	0.656903	-1	0	-1	0	0.751405	-1	0	-1	-1	-1	-1	-1	-1	0.708423
MSpppaap	-1	0.960733	0.769879	0.634208	0.923485	-1	-1	-1	0.72882	-1	-1	-1	-1	-1	-1	-1	-1	-1	-1	-1	-1	-1	-1	-1	-1	-1	-1	-1	-1	0.867561	-1	-1	-1	0.800905	0.656903	-1	0	-1	0	0.751405	-1	0	-1	-1	-1	-1	-1	-1	0.708423
MSappap	-1	-1	0.654553	0.419421	0.705187	0.556097	-1	-1	-1	-1	-1	-1	-1	-1	-1	-1	-1	-1	-1	-1	0.603749	-1	-1	-1	-1	-1	-1	-1	-1	0.722325	-1	-1	-1	-1	-1	-1	0.457948	-1	-1	-1	-1	-1	-1	-1	-1	-1	-1	-1	0.536026
MSpppap	-1	-1	0.654553	0.419421	0.705187	0.556097	-1	-1	-1	-1	-1	-1	-1	-1	-1	-1	-1	-1	-1	-1	0.603749	-1	-1	-1	-1	-1	-1	-1	-1	0.722325	-1	-1	-1	-1	-1	-1	0.457948	-1	-1	-1	-1	-1	-1	-1	-1	-1	-1	-1	0.536026
MSappapp	-1	-1	-1	0.534956	-1	0.46769	-1	-1	-1	-1	-1	-1	-1	-1	-1	-1	-1	-1	-1	-1	0.636995	-1	-1	-1	-1	-1	-1	-1	-1	0.754062	-1	-1	-1	-1	-1	-1	-1	-1	-1	-1	-1	-1	-1	-1	-1	-1	-1	-1	0.497841
MSpppapp	-1	-1	-1	0.534956	-1	0.46769	-1	-1	-1	-1	-1	-1	-1	-1	-1	-1	-1	-1	-1	-1	0.636995	-1	-1	-1	-1	-1	-1	-1	-1	0.754062	-1	-1	-1	-1	-1	-1	-1	-1	-1	-1	-1	-1	-1	-1	-1	-1	-1	-1	0.497841
MSappp	-1	-1	0.736274	0.475003	-1	0.620808	-1	-1	-1	-1	-1	-1	-1	-1	-1	-1	-1	-1	-1	-1	-1	-1	-1	-1	-1	-1	-1	0.339893	-1	0.629283	-1	-1	-1	-1	-1	-1	-1	-1	-1	-1	-1	0	-1	-1	-1	-1	-1	-1	0.584581
MSpppp	-1	-1	0.736274	0.475003	-1	0.620808	-1	-1	-1	-1	-1	-1	-1	-1	-1	-1	-1	-1	-1	-1	-1	-1	-1	-1	-1	-1	-1	0.339893	-1	0.629283	-1	-1	-1	-1	-1	-1	-1	-1	-1	-1	-1	0	-1	-1	-1	-1	-1	-1	0.584581
MSapppa	-1	-1	-1	0.440645	-1	-1	-1	-1	-1	-1	-1	-1	-1	-1	-1	-1	-1	-1	-1	-1	-1	-1	-1	-1	-1	-1	-1	-1	-1	0.783134	-1	-1	-1	-1	-1	-1	0.51466	-1	-1	-1	-1	-1	-1	-1	-1	-1	-1	-1	0.629409
MSppppa	-1	-1	-1	0.440645	-1	-1	-1	-1	-1	-1	-1	-1	-1	-1	-1	-1	-1	-1	-1	-1	-1	-1	-1	-1	-1	-1	-1	-1	-1	0.783134	-1	-1	-1	-1	-1	-1	0.51466	-1	-1	-1	-1	-1	-1	-1	-1	-1	-1	-1	0.629409
MSapppaa	-1	-1	-1	0	-1	0.485099	-1	-1	-1	-1	-1	-1	-1	-1	-1	-1	-1	-1	-1	-1	-1	-1	0	-1	-1	-1	-1	-1	-1	0.669229	-1	-1	-1	-1	-1	-1	-1	-1	-1	-1	-1	0	-1	-1	-1	-1	-1	-1	0.395134
MSppppaa	-1	-1	-1	0	-1	0.485099	-1	-1	-1	-1	-1	-1	-1	-1	-1	-1	-1	-1	-1	-1	-1	-1	0	-1	-1	-1	-1	-1	-1	0.669229	-1	-1	-1	-1	-1	-1	-1	-1	-1	-1	-1	0	-1	-1	-1	-1	-1	-1	0.395134
MSapppap	-1	-1	-1	0.572047	-1	0.56051	-1	-1	0.784661	-1	-1	0.638924	-1	-1	-1	-1	-1	-1	-1	-1	-1	-1	-1	-1	-1	-1	-1	-1	-1	0.716834	-1	-1	-1	-1	-1	-1	-1	-1	-1	-1	-1	-1	-1	-1	-1	-1	-1	-1	0.483479
MSppppap	-1	-1	-1	0.572047	-1	0.56051	-1	-1	0.784661	-1	-1	0.638924	-1	-1	-1	-1	-1	-1	-1	-1	-1	-1	-1	-1	-1	-1	-1	-1	-1	0.716834	-1	-1	-1	-1	-1	-1	-1	-1	-1	-1	-1	-1	-1	-1	-1	-1	-1	-1	0.483479
MSapppp	-1	-1	0.711479	0	-1	-1	-1	-1	-1	-1	-1	-1	-1	-1	-1	-1	-1	-1	-1	-1	-1	-1	-1	-1	-1	-1	-1	-1	-1	0.754719	-1	-1	-1	-1	-1	-1	0.490928	-1	-1	-1	-1	-1	-1	-1	-1	-1	-1	-1	0.593747
MSppppp	-1	-1	0.711479	0	-1	-1	-1	-1	-1	-1	-1	-1	-1	-1	-1	-1	-1	-1	-1	-1	-1	-1	-1	-1	-1	-1	-1	-1	-1	0.754719	-1	-1	-1	-1	-1	-1	0.490928	-1	-1	-1	-1	-1	-1	-1	-1	-1	-1	-1	0.593747
MSappppa	-1	-1	-1	0.507081	-1	0.468349	-1	-1	-1	-1	-1	-1	-1	-1	0.57271	-1	-1	-1	-1	-1	0.406625	-1	-1	-1	-1	-1	-1	-1	-1	0.655814	-1	-1	-1	-1	-1	-1	0	-1	-1	-1	-1	-1	-1	-1	-1	-1	-1	-1	0.450029
MSpppppa	-1	-1	-1	0.507081	-1	0.468349	-1	-1	-1	-1	-1	-1	-1	-1	0.57271	-1	-1	-1	-1	-1	0.406625	-1	-1	-1	-1	-1	-1	-1	-1	0.655814	-1	-1	-1	-1	-1	-1	0	-1	-1	-1	-1	-1	-1	-1	-1	-1	-1	-1	0.450029
MSappppp	-1	-1	-1	0.555632	-1	-1	-1	-1	-1	-1	-1	0.629095	-1	-1	-1	-1	-1	-1	-1	-1	-1	-1	-1	-1	-1	-1	-1	-1	-1	0.679575	-1	-1	-1	-1	-1	-1	-1	-1	-1	-1	-1	-1	-1	-1	-1	-1	-1	-1	0.466714
MSpppppp	-1	-1	-1	0.555632	-1	-1	-1	-1	-1	-1	-1	0.629095	-1	-1	-1	-1	-1	-1	-1	-1	-1	-1	-1	-1	-1	-1	-1	-1	-1	0.679575	-1	-1	-1	-1	-1	-1	-1	-1	-1	-1	-1	-1	-1	-1	-1	-1	-1	-1	0.466714
[truncated: 74 more columns]

## Sheet: s5.Worm_terminal_lineage
CellType	B0310.2	C38D4.7	K09A11.1	M03D4.4	T22C8.4	T23F11.4	Y22D7AL.16	ahr-1	bcl-11	bed-3	blmp-1	ceh-13	ceh-14	ceh-18	ceh-19	ceh-2	ceh-22	ceh-24	ceh-30	ceh-31	ceh-34	ceh-36	ceh-39	ceh-43	ceh-45	ceh-48	ceh-5	ceh-51	ceh-6	ceh-83	ceh-9	ces-1	che-1	cnd-1	cog-1	dmd-4	drap-1	dve-1	elt-1	elt-2	elt-3	elt-4	ets-4	ets-7	eyg-1	fax-1	fkh-10	fkh-6	flh-1
ADE	-1	0.856257	0.95529	-1	0.836644	0.876563	-1	-1	-1	0.909547	-1	0.818551	0.661218	-1	-1	-1	-1	-1	0.557406	-1	-1	-1	0.651265	0.883649	-1	1	-1	-1	-1	-1	-1	-1	-1	0.902265	-1	-1	0.662952	-1	-1	-1	-1	-1	-1	-1	-1	-1	-1	-1	0.822735
ADEsh	-1	-1	0.633868	-1	-1	0.571775	-1	-1	-1	0.679829	1	-1	-1	-1	-1	-1	-1	-1	-1	-1	-1	-1	0	0.882603	-1	-1	-1	0	-1	-1	-1	-1	-1	-1	-1	-1	-1	-1	-1	-1	-1	-1	-1	-1	-1	-1	-1	-1	0.356525
ADF	0.614055	-1	0.882866	-1	0.715749	0.87016	0.777415	-1	-1	-1	-1	-1	-1	-1	0.790752	-1	-1	-1	-1	-1	-1	-1	-1	-1	-1	0.888485	-1	0.450746	-1	-1	-1	-1	-1	-1	0.605249	-1	0.632964	-1	-1	0.633994	-1	-1	-1	-1	-1	-1	-1	-1	0.834403
ADF_AWB_terminal_cells_but_undifferentiated	-1	-1	-1	-1	0.835994	0.912138	-1	-1	-1	-1	0.614074	-1	0.808335	-1	-1	-1	-1	-1	0.326784	-1	-1	-1	0.736252	-1	-1	0.890863	-1	0	-1	0.813382	-1	0.763981	-1	-1	0.626116	-1	0.628466	-1	-1	0.749213	-1	-1	-1	-1	-1	-1	-1	-1	0.844621
ADL	0.577214	-1	0.855669	-1	-1	0.803315	0.474287	-1	-1	-1	-1	-1	-1	-1	-1	-1	-1	-1	-1	-1	-1	-1	0.696543	-1	-1	0.859776	-1	0	-1	0.847587	-1	-1	-1	-1	0.772498	-1	0	-1	-1	0.554716	-1	0	-1	-1	-1	-1	-1	-1	0.839248
AFD	-1	-1	0.664981	-1	-1	0.783446	-1	-1	-1	0.508779	0.478596	-1	0.865676	-1	-1	-1	-1	-1	-1	-1	-1	-1	0.70172	0.753701	-1	0.874105	-1	0	-1	0	-1	-1	-1	-1	-1	-1	0.79706	-1	0	0.774633	-1	0.906263	-1	-1	-1	-1	-1	-1	0.810292
AIA	-1	-1	-1	-1	-1	-1	-1	-1	-1	-1	-1	-1	-1	-1	-1	-1	-1	0.829598	-1	-1	-1	-1	-1	0.582413	-1	1	-1	-1	-1	0.621513	-1	-1	-1	-1	0.81396	-1	0.859428	-1	-1	-1	-1	-1	-1	-1	-1	-1	-1	-1	0.683658
AIB	-1	-1	0	-1	-1	0.856638	-1	-1	-1	-1	-1	-1	-1	0	-1	-1	-1	-1	-1	-1	-1	-1	0.725997	0.76058	-1	0.976852	-1	0	-1	0.773085	-1	-1	-1	0.860824	-1	-1	0.359695	-1	0	0	-1	-1	-1	-1	-1	-1	-1	-1	0.778069
AIM	-1	-1	-1	-1	-1	0.696138	-1	-1	0.394801	0.510683	0.544268	0.193015	-1	-1	-1	-1	-1	-1	-1	-1	-1	-1	0.656659	0.78142	-1	0.766327	-1	0	-1	0.715177	-1	0.780169	-1	-1	-1	-1	0.620039	-1	-1	0.784943	-1	-1	0.57196	-1	-1	-1	-1	-1	0.661576
AIN	-1	-1	-1	-1	-1	0.764153	-1	-1	-1	-1	0	-1	-1	-1	-1	-1	-1	-1	0.526769	-1	-1	-1	-1	0.796348	-1	0.966553	-1	-1	-1	-1	-1	-1	-1	-1	-1	-1	-1	-1	-1	-1	-1	-1	-1	-1	-1	-1	-1	-1	-1
AIY	-1	-1	0.516825	-1	-1	0.763325	-1	-1	-1	-1	-1	-1	-1	-1	-1	-1	-1	-1	-1	-1	-1	-1	0.635721	0.649369	-1	0.919534	-1	0	-1	0.697906	-1	-1	-1	-1	-1	-1	0	-1	-1	0.674208	0.664674	0	-1	-1	0.575859	0.699238	-1	-1	0.727228
AIZ	-1	-1	0.743526	-1	-1	-1	-1	-1	-1	0.873465	-1	0.460384	-1	-1	-1	-1	-1	-1	-1	-1	-1	-1	-1	0.86072	-1	0.925404	-1	-1	-1	0.649268	-1	-1	-1	-1	-1	-1	0.644414	-1	-1	-1	-1	0	-1	-1	-1	-1	-1	-1	-1
ALA	0.806512	-1	0.5429	-1	-1	0.820857	-1	-1	-1	-1	-1	-1	0.750327	-1	-1	-1	-1	-1	-1	-1	-1	-1	-1	0.85557	-1	0.993009	0.755227	0	-1	0.777528	-1	-1	-1	-1	-1	-1	0.588161	-1	-1	-1	0.788391	-1	-1	-1	-1	-1	-1	-1	0.862666
ALM_BDU	-1	-1	0.68226	-1	0.821034	0.84515	-1	0.761217	-1	-1	0.749066	-1	-1	-1	-1	-1	-1	-1	-1	-1	-1	-1	0.668183	-1	-1	1	-1	-1	-1	0.617305	-1	-1	-1	-1	0.739868	-1	0.480232	-1	0	0.82449	-1	-1	-1	-1	-1	-1	-1	-1	0.838394
ALM_PLM	0.58172	-1	-1	-1	-1	0.80784	-1	-1	-1	-1	-1	-1	-1	0	-1	-1	-1	-1	-1	-1	-1	-1	-1	-1	-1	1	-1	-1	-1	-1	-1	-1	-1	-1	-1	-1	-1	-1	-1	-1	-1	0	-1	-1	-1	-1	-1	-1	0.74888
AMsh	-1	-1	0.657572	-1	-1	0.755995	-1	-1	0.47631	0.64176	0.986444	-1	-1	0.722146	-1	-1	-1	-1	-1	-1	-1	-1	0.690559	0.926229	-1	-1	-1	0	-1	0.66998	-1	-1	-1	-1	-1	-1	0.293315	-1	-1	0.581668	-1	0	-1	0.836641	-1	-1	-1	-1	0.724337
AMso	-1	0.641068	0.627082	-1	0	0.720914	-1	-1	0.711403	0.650927	1	0.463309	-1	-1	-1	-1	-1	-1	-1	-1	-1	-1	0	0.759662	-1	0.736663	-1	0	-1	0	-1	-1	-1	-1	-1	-1	0.814349	0	-1	-1	0	0.75396	0.498495	0.573138	-1	-1	-1	-1	0.509968
ASE	0.656869	-1	0.680109	-1	0.731302	0.902273	-1	-1	-1	-1	-1	-1	-1	-1	-1	-1	-1	-1	-1	-1	-1	0.8418	0.735979	-1	-1	0.85999	-1	-1	-1	0.636396	-1	-1	0.630317	-1	0.524969	-1	0.674273	-1	-1	-1	-1	0	-1	-1	-1	-1	-1	-1	0.80755
ASEL	-1	-1	0.829904	-1	-1	0.567306	0.556033	-1	-1	-1	-1	-1	-1	0.447381	-1	-1	-1	-1	-1	-1	-1	0.845219	-1	-1	-1	1	-1	0.29421	-1	-1	-1	-1	0.850261	-1	-1	-1	0.506746	-1	-1	-1	-1	-1	-1	-1	-1	-1	-1	-1	-1
ASER	-1	-1	0.91508	-1	-1	0.841134	0.582034	-1	-1	-1	0.619283	-1	-1	-1	-1	-1	-1	-1	-1	-1	-1	0.818634	0	-1	-1	0.999194	-1	-1	-1	-1	-1	-1	0.876754	-1	0.632429	-1	0.653248	-1	-1	-1	-1	-1	-1	-1	-1	-1	-1	-1	1
ASG	0.68607	0.651998	-1	-1	-1	0.857594	-1	-1	-1	-1	-1	-1	-1	-1	-1	-1	-1	-1	-1	-1	-1	-1	0.602916	-1	-1	0.918798	-1	0	-1	0.729924	-1	-1	-1	-1	0.761056	-1	0.683601	-1	-1	-1	-1	-1	-1	-1	0.59577	-1	-1	1	0.837047
ASG_AWA_terminal_cells_but_undifferentiated	-1	0.544346	0.635555	-1	-1	0.756631	-1	-1	-1	-1	-1	-1	-1	-1	-1	-1	-1	-1	-1	-1	-1	-1	-1	0.805541	-1	0.780973	-1	-1	-1	0.760756	-1	0.627743	-1	-1	-1	-1	-1	-1	-1	0.705003	-1	-1	-1	-1	-1	-1	-1	-1	0.74539
ASH	-1	-1	0.916911	0.616962	-1	0.823041	0.728859	-1	-1	-1	-1	-1	-1	0.666642	-1	-1	-1	-1	-1	-1	-1	-1	0.693622	0.774938	-1	0.769173	-1	0.59594	-1	0.724558	-1	0.966102	-1	-1	0.512389	-1	0.647035	-1	-1	-1	0.783855	-1	-1	1	-1	-1	-1	-1	0.861208
ASI	-1	-1	0.725783	-1	-1	0.871453	0.681293	-1	-1	-1	-1	-1	-1	-1	-1	-1	-1	-1	-1	-1	-1	-1	0.668812	-1	-1	0.928099	-1	0	-1	-1	-1	-1	-1	-1	-1	-1	0.56093	-1	-1	-1	-1	0.448184	-1	1	-1	-1	-1	-1	0.897529
ASJ	0.65715	-1	0.858968	0.649375	0.728936	0.857596	0.577566	-1	-1	-1	-1	-1	-1	-1	-1	-1	-1	-1	-1	-1	-1	-1	0.676799	0.765495	-1	0.893319	-1	0	-1	0.835777	-1	-1	-1	0.887497	0.540328	-1	0.629669	-1	-1	-1	-1	0	-1	-1	-1	-1	-1	-1	0.851696
ASK	-1	-1	-1	-1	-1	0.918577	0.597734	-1	-1	-1	0.696593	-1	-1	-1	-1	-1	-1	-1	-1	-1	-1	-1	0.733078	-1	-1	1	-1	0	-1	0.821679	-1	-1	-1	-1	-1	-1	0.444905	-1	-1	-1	-1	-1	-1	-1	-1	-1	-1	-1	0.942123
AUA	-1	-1	0.69677	-1	-1	0.772445	-1	-1	-1	-1	-1	-1	-1	-1	-1	-1	-1	-1	-1	-1	-1	-1	0.654541	0.767282	-1	0.842175	-1	-1	1	0.661981	-1	-1	-1	0.874906	-1	-1	0.403642	-1	-1	0.638831	-1	-1	-1	-1	-1	-1	-1	-1	0.705481
AVA	-1	-1	0.680483	0.779943	0.705453	0.716493	-1	-1	-1	0.587256	-1	-1	-1	0	-1	-1	-1	-1	-1	-1	-1	-1	0.634641	0.784444	-1	0.780421	-1	0	-1	0.799763	-1	-1	-1	-1	-1	-1	0	-1	-1	0.692404	0.646239	-1	-1	-1	-1	0.70934	-1	-1	0.661953
AVB	-1	-1	0.66293	-1	-1	0.769202	-1	-1	0.549262	-1	0	-1	-1	0	-1	-1	-1	-1	0.485972	1	-1	-1	-1	-1	-1	0.855663	-1	-1	-1	-1	-1	-1	-1	-1	-1	-1	0.766605	-1	-1	0	-1	-1	0.559046	-1	-1	0.685184	-1	-1	0.614481
AVD	-1	-1	-1	-1	-1	0.763643	-1	0.851012	0.502177	0.550267	-1	-1	-1	0	-1	-1	-1	-1	0.506099	0.934475	-1	-1	-1	0.805833	-1	0.85136	-1	0	-1	0.812844	-1	-1	-1	0.848352	-1	-1	-1	-1	-1	0.82157	-1	0	-1	-1	-1	-1	-1	-1	0.715084
AVE	-1	-1	0.727868	-1	-1	0.791615	-1	-1	-1	-1	0.643297	-1	-1	-1	-1	-1	-1	-1	-1	-1	-1	-1	-1	-1	-1	0.860079	-1	0	-1	-1	-1	-1	-1	-1	0.890802	-1	0	-1	-1	0.81709	0.454961	0	-1	-1	-1	0.73423	-1	-1	0.633215
AVG	-1	-1	0.6233	-1	-1	0.727003	-1	-1	-1	-1	0.56945	-1	-1	-1	-1	-1	-1	-1	-1	-1	-1	-1	0.605433	0.738554	-1	0.897385	-1	0	-1	-1	-1	-1	-1	0.789562	-1	-1	0	0	0.57721	-1	-1	-1	-1	-1	-1	-1	-1	-1	0.657137
AVH	-1	0.632459	-1	0.631632	-1	0.643617	-1	-1	-1	0.525464	-1	0.646537	0.622133	-1	-1	-1	-1	-1	-1	-1	-1	-1	0.62547	0.720501	-1	0.746475	-1	0	0.824623	-1	-1	-1	-1	-1	0.646928	-1	0.446199	-1	0.58212	-1	-1	0	0.490608	-1	-1	-1	-1	-1	0.629693
AVJ	-1	-1	0.679863	-1	-1	0.742746	-1	-1	0.484546	-1	-1	-1	-1	-1	-1	-1	-1	-1	-1	-1	-1	-1	-1	0.785488	-1	0.872656	-1	-1	-1	0.847101	-1	-1	-1	-1	-1	-1	0	-1	-1	-1	0.739888	-1	-1	-1	-1	-1	-1	-1	0.594935
AVK	0.561515	-1	0.62228	-1	-1	0.709717	-1	-1	-1	-1	-1	0.45895	-1	0	-1	-1	-1	-1	0.568222	-1	-1	-1	-1	-1	-1	1	-1	0	-1	-1	-1	-1	-1	-1	-1	-1	0	-1	-1	-1	-1	-1	-1	-1	-1	0	-1	-1	0.776596
AVL	-1	-1	0.625932	-1	-1	0.86902	-1	-1	0.591828	-1	-1	0.39031	-1	-1	-1	-1	-1	0.994308	-1	-1	-1	-1	-1	-1	-1	0.939273	-1	-1	-1	0	-1	-1	-1	-1	0.745767	-1	0	-1	-1	-1	-1	0	-1	-1	-1	-1	0.713464	-1	0.86435
AWA	0.641008	0.508407	0.848328	0.629851	0.761326	0.799727	-1	-1	-1	0.708515	0.569309	-1	-1	-1	-1	-1	-1	1	-1	-1	-1	-1	-1	0.793398	-1	0.870967	-1	0	-1	0.742645	-1	0.754606	-1	-1	0.486193	-1	0.667603	-1	-1	-1	-1	0	-1	-1	-1	-1	-1	-1	0.832897
AWB	-1	-1	-1	-1	-1	0.899131	-1	-1	-1	-1	-1	-1	-1	0.907259	-1	-1	-1	-1	0.565891	-1	-1	-1	0.696148	-1	-1	0.958188	-1	-1	-1	-1	-1	-1	-1	-1	0.833942	-1	0.633342	-1	-1	-1	-1	-1	-1	-1	-1	-1	-1	-1	0.806417
AWC	-1	-1	0.873128	-1	-1	0.904523	-1	-1	0.549225	-1	-1	-1	-1	-1	-1	-1	-1	-1	-1	-1	-1	1	0.679839	0.826279	-1	0.923603	-1	0	-1	0.830132	-1	-1	-1	-1	-1	-1	0.628163	-1	0.686703	0.783252	-1	-1	-1	-1	-1	-1	-1	-1	0.86996
Anterior_arcade_cell	-1	-1	0.639308	-1	-1	0.808583	-1	-1	0.691627	-1	0.780324	0	-1	0	-1	-1	-1	-1	0.595583	-1	-1	-1	-1	0.760877	-1	-1	-1	0	-1	0	-1	-1	-1	-1	-1	-1	0	0.719273	-1	0	-1	-1	0.780875	-1	-1	-1	-1	-1	0.442182
Arcade_cell_anterior_and_posterior	-1	-1	-1	-1	-1	0.781792	-1	-1	0.873748	-1	-1	-1	-1	0	-1	-1	-1	-1	-1	-1	-1	-1	-1	-1	-1	-1	-1	-1	-1	-1	-1	-1	-1	-1	-1	-1	0	-1	-1	-1	-1	-1	-1	-1	0.55984	-1	-1	-1	0.446938
B	-1	0.280242	-1	-1	0.564404	0.539711	-1	-1	-1	-1	0.553004	-1	-1	-1	-1	-1	-1	-1	-1	-1	-1	-1	0.72682	0.695735	-1	-1	-1	0.121225	0.737023	-1	-1	-1	-1	-1	0.431214	-1	0.424911	-1	-1	-1	0.37708	-1	-1	-1	-1	-1	-1	-1	0.53568
BAG	0.608519	-1	0.945668	-1	-1	0.858441	-1	-1	-1	0.933511	-1	-1	-1	-1	-1	-1	-1	-1	-1	-1	-1	-1	-1	-1	-1	1	-1	-1	-1	-1	-1	-1	-1	-1	-1	-1	0.777686	-1	-1	-1	-1	-1	-1	0.999803	-1	-1	0.542513	-1	0.852444
BWM_anterior	-1	-1	0	0.640883	-1	0.665778	-1	-1	0.72945	-1	-1	0.586893	-1	0.931836	-1	-1	-1	-1	-1	-1	-1	-1	0	0.529558	-1	-1	-1	0	-1	0	-1	-1	-1	-1	-1	-1	0	-1	-1	-1	-1	-1	-1	0.719089	-1	-1	-1	-1	0.718897
BWM_far_posterior	-1	-1	0	0.600822	0	0.588632	-1	-1	-1	-1	-1	-1	-1	0.98686	-1	-1	-1	-1	-1	-1	-1	-1	0	-1	-1	-1	-1	0	-1	0	-1	-1	-1	-1	-1	-1	0	-1	-1	-1	-1	0	-1	-1	-1	-1	-1	-1	0.777437
BWM_head_row_1	0.52312	-1	0.554966	0.682704	0.411899	0.717326	-1	-1	0.634035	-1	-1	-1	-1	0.878327	-1	-1	-1	-1	-1	-1	0.739237	-1	0.499471	-1	-1	-1	-1	0	-1	0.607024	-1	-1	-1	-1	-1	-1	0	-1	-1	-1	-1	-1	-1	-1	-1	-1	-1	-1	0.661609
BWM_head_row_2	-1	-1	0.571272	0.678086	0	0.668127	-1	-1	0.678244	-1	-1	0.495604	-1	0.919352	-1	-1	-1	-1	-1	-1	0.646042	-1	0	-1	-1	-1	-1	-1	-1	0	-1	-1	-1	-1	-1	-1	0	-1	-1	-1	-1	0	-1	-1	-1	-1	-1	-1	0.720399
BWM_posterior	0.48001	-1	0	0.647617	0	0.65183	-1	-1	0.627545	-1	-1	0.428546	-1	0.954742	-1	-1	-1	-1	-1	-1	-1	-1	0	-1	-1	-1	-1	0	-1	0	-1	-1	-1	-1	-1	-1	0	-1	-1	-1	-1	-1	-1	-1	-1	-1	-1	-1	0.761122
B_F_K_Kp_U_Y	0.572768	-1	0.386416	-1	-1	1	-1	-1	0.699983	0.542442	0.773408	-1	-1	-1	-1	-1	-1	-1	-1	-1	-1	-1	0.435139	-1	-1	0.402694	-1	0	0.553962	-1	-1	-1	-1	-1	0.456737	-1	0.420863	0.448464	0.77509	-1	0.709027	-1	0	-1	-1	-1	-1	-1	0.382811
CAN	-1	-1	0.465217	-1	-1	0.518956	-1	-1	-1	0.349709	-1	-1	-1	-1	-1	-1	-1	-1	0.350247	-1	-1	-1	-1	0.675468	-1	0.652941	-1	-1	-1	-1	-1	-1	-1	-1	-1	-1	0	0	-1	-1	-1	-1	-1	0.639295	-1	-1	-1	0.69209	0.504536
CEP	-1	-1	0.94815	-1	0.752984	0.873602	-1	-1	-1	0.960977	0.859219	-1	-1	-1	-1	-1	-1	-1	-1	-1	-1	-1	-1	0.84862	-1	0.83266	-1	0	0.745833	0.698877	-1	-1	-1	-1	0.741051	-1	0.527891	-1	0.684104	-1	-1	-1	-1	-1	-1	-1	-1	-1	0.885794
CEPsh	-1	-1	0.64493	0.60183	-1	0.599826	-1	-1	-1	0.755977	1	-1	-1	0.646676	-1	-1	-1	-1	0.396852	0.810666	-1	-1	-1	0.843635	-1	0.841835	-1	0	-1	-1	-1	-1	-1	-1	-1	-1	-1	-1	0.766549	0.796513	-1	0	-1	-1	-1	-1	-1	-1	-1
CEPso	0.555781	-1	0.580929	-1	-1	0.631261	-1	-1	-1	0.684395	0.911824	-1	-1	-1	-1	-1	-1	-1	0.4952	0.811243	-1	-1	0.68666	0.923758	-1	0.746638	-1	0.404141	-1	-1	-1	-1	-1	-1	-1	-1	0.509003	-1	-1	0.785726	0.749714	0.705352	0.371325	0.654544	-1	-1	-1	-1	0.411816
Coelomocyte	-1	-1	-1	0	-1	0.62415	-1	0.470635	-1	-1	-1	0.29449	-1	-1	-1	-1	-1	-1	-1	-1	0.628726	-1	0.564556	0.583447	-1	0.843093	-1	0	-1	0.595277	-1	-1	-1	-1	-1	-1	0	0.515427	-1	-1	-1	-1	-1	0.352983	-1	-1	0.347413	-1	0.475005
DA	-1	-1	0.678844	-1	-1	0.744176	-1	-1	-1	-1	-1	0.929206	-1	0.679698	-1	-1	-1	-1	-1	-1	-1	-1	-1	-1	-1	0.889853	-1	0	-1	0.813398	-1	0.714543	-1	1	-1	-1	0	-1	0.749986	-1	0.573172	-1	-1	0.651813	-1	-1	-1	-1	0.805666
DA_DB	0.434677	-1	0.677264	-1	-1	0.717813	-1	-1	0.483809	0.690495	-1	0.395959	-1	0.811922	-1	-1	-1	-1	0.427311	-1	-1	-1	0.65806	0.764447	-1	0.772494	-1	0.625009	-1	0	-1	0.763003	-1	-1	-1	-1	0.524036	-1	0.6783	-1	-1	0	-1	-1	0	-1	-1	-1	0.680135
DB	0.500963	0.463529	0.730263	-1	0.816164	0.774581	-1	-1	-1	-1	0.616982	0.943974	-1	0	-1	-1	-1	-1	-1	-1	-1	-1	0	0.804043	-1	0.911683	-1	-1	0.762451	-1	-1	-1	-1	-1	-1	-1	0.458497	-1	0	-1	-1	-1	-1	0.680781	0.392543	-1	-1	-1	0.778145
DD	-1	0.61787	0.670462	0.62316	-1	0.737276	-1	-1	-1	-1	-1	0.821629	-1	0	-1	-1	-1	-1	-1	-1	-1	-1	0.489324	-1	-1	0.826354	-1	0	-1	-1	-1	0.709975	-1	0.979277	-1	-1	0	0.945957	0.698104	-1	-1	0	-1	-1	-1	-1	-1	-1	0.672105
DVA	0.56386	0.465196	0.655586	0.63723	0.637413	0.658408	-1	-1	-1	-1	0	0.757528	-1	0.573887	-1	-1	-1	-1	-1	-1	-1	-1	0.66646	0.667659	-1	0.79129	-1	0.5311	0.589502	0.65027	-1	-1	-1	0.907845	-1	-1	0	-1	0.570752	0.671643	0.593411	-1	-1	-1	-1	0.678497	-1	-1	0.763131
DVC	-1	-1	-1	-1	-1	0.730239	-1	-1	0.513709	0.605525	0.720824	0.488563	0.652136	-1	-1	-1	-1	-1	0.529545	-1	-1	-1	0.724288	0.782908	-1	0.938152	-1	0	-1	-1	-1	-1	-1	-1	0.676765	-1	0.571713	-1	0.293027	0.810833	-1	0.302817	-1	-1	-1	-1	-1	-1	0.683795
Excretory_cell	-1	-1	0.813737	-1	-1	0.980096	-1	-1	0.6466	-1	0.912955	0.620668	-1	-1	-1	-1	-1	-1	-1	-1	-1	-1	-1	0.808199	-1	-1	-1	-1	0.942739	0.748341	-1	-1	-1	-1	-1	-1	0.512307	0.591707	0.797708	-1	-1	-1	-1	0.940364	-1	-1	-1	-1	0.783557
Excretory_duct	0.733552	-1	0	-1	-1	0.823227	-1	-1	-1	0.704113	0.982106	-1	-1	-1	-1	-1	-1	-1	-1	-1	-1	-1	-1	-1	-1	1	-1	-1	-1	0.773808	-1	-1	-1	-1	-1	-1	0.663646	-1	-1	-1	-1	-1	-1	-1	-1	-1	-1	-1	-1
Excretory_duct_and_pore	-1	-1	0.698522	-1	-1	0.737589	-1	-1	-1	0.391751	0.854464	-1	-1	-1	-1	-1	-1	-1	0.476365	0.82688	-1	-1	0.709753	0.772478	-1	-1	-1	-1	0.668839	0.689608	-1	-1	-1	-1	-1	-1	0.598232	-1	-1	0.730918	-1	-1	-1	-1	-1	-1	-1	-1	0.679896
Excretory_gland	-1	-1	0.51859	0.641299	0.757166	0.841334	-1	-1	-1	-1	-1	0.442484	-1	-1	-1	-1	-1	-1	0.511668	-1	-1	-1	0.596539	0.744641	-1	0.868265	-1	0	-1	0	-1	-1	-1	-1	-1	-1	0.62849	-1	-1	0.580505	0.375067	0	-1	0.818892	-1	-1	-1	-1	0.654654
Excretory_pore_G1	-1	-1	-1	-1	-1	0.808445	-1	-1	-1	-1	0.903141	-1	-1	-1	-1	-1	-1	-1	-1	-1	-1	-1	0.715113	-1	-1	-1	-1	-1	-1	-1	-1	-1	-1	-1	-1	-1	0.736056	-1	-1	-1	0.872086	-1	-1	-1	-1	-1	-1	-1	0.553315
FLP	-1	-1	-1	-1	-1	0.851662	-1	-1	-1	-1	-1	-1	-1	-1	-1	-1	-1	-1	-1	-1	-1	-1	-1	-1	-1	1	-1	-1	-1	-1	-1	-1	-1	0.869807	-1	-1	0.596121	-1	-1	-1	0.336149	-1	-1	-1	-1	-1	-1	-1	-1
F_U	-1	0.411903	-1	-1	0.58484	0.584477	-1	-1	-1	0.323705	0.653425	0.662151	-1	-1	-1	-1	-1	-1	-1	-1	-1	-1	-1	0.654276	-1	-1	-1	-1	-1	0.381077	-1	-1	-1	-1	0	-1	-1	-1	-1	-1	-1	-1	-1	-1	-1	-1	-1	-1	0.496557
G2_and_W_blasts	-1	-1	0.565681	-1	-1	0.754116	-1	0.395441	-1	-1	0.633552	-1	-1	-1	-1	-1	-1	-1	-1	-1	-1	-1	-1	-1	-1	-1	-1	0	-1	0.712854	-1	-1	-1	-1	-1	-1	0	-1	-1	0.646262	1	-1	-1	-1	-1	-1	-1	-1	0.599015
GLR	0.773121	-1	0.6752	0.623498	-1	0.672488	-1	-1	-1	-1	-1	-1	-1	0.865291	-1	-1	-1	-1	-1	-1	-1	-1	0.712237	-1	-1	0.869106	-1	0	-1	-1	-1	-1	-1	-1	-1	-1	-1	0.632902	-1	0.673637	0.615369	-1	-1	-1	-1	-1	-1	-1	0.51506
Germline	-1	-1	0.249826	-1	0	-1	-1	-1	-1	-1	-1	-1	-1	-1	-1	-1	-1	-1	-1	-1	-1	-1	0.693223	-1	-1	-1	-1	0.542135	-1	0.775886	-1	-1	-1	-1	-1	-1	0	-1	-1	-1	-1	-1	-1	-1	-1	-1	-1	-1	0.897033
I5	0.425073	-1	0.601692	-1	-1	0.796396	-1	-1	-1	-1	-1	0.822563	-1	-1	-1	-1	-1	-1	-1	-1	0.917735	-1	-1	-1	-1	0.807922	-1	0	0.920957	0.769597	-1	0.828223	-1	0.974179	-1	0.913896	0	-1	-1	-1	-1	-1	-1	0.761466	-1	-1	-1	-1	0.810553
IL1	-1	-1	-1	0.73002	-1	-1	-1	-1	-1	0.859215	-1	-1	-1	0.567025	-1	-1	-1	-1	-1	-1	-1	-1	0.569605	0.800125	-1	0.851951	-1	0	-1	0.618732	-1	-1	0.738639	-1	0.815848	-1	-1	-1	0.732517	-1	-1	0	-1	0.863299	-1	-1	-1	-1	0.740508
IL2	0.669164	-1	0.799832	-1	-1	0.754591	-1	-1	0.57701	-1	-1	0.766574	-1	-1	-1	-1	-1	-1	0.476993	0.785245	-1	-1	0.678532	0.811702	-1	0.840475	-1	0	-1	0.655401	-1	-1	-1	-1	-1	-1	0.626641	-1	-1	0.755418	-1	0	-1	-1	-1	-1	-1	-1	0.730361
ILsh_OLLsh_OLQsh	-1	-1	0.580923	-1	-1	0.595896	-1	-1	0.440246	0.653409	1	0.411892	-1	-1	-1	-1	-1	-1	0.396092	0.690357	-1	-1	0.597322	0.862177	-1	0.790743	-1	-1	-1	0.656081	-1	-1	-1	-1	-1	-1	0	-1	-1	-1	-1	0	-1	-1	0.560046	-1	-1	0.856051	0.532524
ILso	-1	-1	0.418785	-1	0.650932	0.500837	-1	-1	-1	0.424104	0.932957	-1	-1	-1	-1	-1	-1	-1	0.430079	0.888238	-1	-1	0.69511	0.784433	-1	-1	-1	0	-1	-1	-1	-1	-1	-1	-1	-1	0	-1	0.744203	0.765694	-1	-1	0.362745	-1	-1	-1	-1	-1	0.422582
Intestine	0.416651	-1	0.362613	-1	0	0.559509	-1	-1	-1	-1	-1	-1	-1	-1	-1	-1	-1	-1	-1	-1	-1	-1	-1	-1	-1	-1	-1	-1	-1	0.97189	-1	-1	-1	-1	-1	-1	-1	0.644198	-1	1	-1	0	0.525097	-1	-1	-1	-1	-1	0.539519
Intestine_anterior	0.609983	-1	0	-1	-1	0.576042	-1	-1	-1	-1	-1	-1	-1	-1	-1	-1	-1	-1	-1	-1	-1	-1	-1	-1	-1	-1	-1	-1	-1	0.816329	-1	-1	-1	-1	-1	-1	0	0.75775	-1	0.874684	-1	0	-1	-1	-1	-1	-1	-1	-1
Intestine_far_posterior	-1	-1	-1	-1	-1	0.500958	-1	-1	-1	-1	-1	-1	-1	-1	-1	-1	-1	-1	-1	-1	-1	-1	-1	-1	-1	-1	-1	-1	-1	-1	-1	-1	-1	-1	-1	-1	-1	-1	-1	0.837671	-1	0	-1	-1	-1	-1	-1	-1	-1
Intestine_middle_and_posterior	-1	-1	-1	-1	-1	0.516648	-1	-1	-1	-1	-1	-1	-1	-1	-1	-1	-1	-1	-1	-1	-1	-1	-1	-1	-1	-1	-1	-1	-1	-1	-1	-1	-1	-1	-1	-1	-1	-1	-1	0.872443	-1	0	-1	-1	-1	-1	-1	-1	-1
K_Kprime	-1	-1	-1	-1	-1	0.739112	-1	-1	-1	-1	0.873928	0.740222	-1	-1	-1	-1	-1	-1	-1	-1	-1	-1	-1	-1	-1	-1	-1	-1	-1	-1	-1	-1	-1	-1	0.73201	-1	0.610823	-1	-1	0.75489	-1	-1	-1	-1	-1	-1	-1	0.604222	0.71711
MC	-1	-1	0.682615	0.67467	-1	0.831573	-1	0.592105	-1	-1	0.33432	-1	-1	-1	0.784364	0.767902	0.630553	-1	-1	-1	0.807422	-1	-1	0.685577	0.52395	0.874851	-1	-1	-1	0.797348	-1	0.709132	-1	-1	0.681814	-1	0.459139	-1	0.607033	0.725413	0.711688	-1	-1	-1	-1	-1	-1	0.62211	0.659115
M_cell	-1	0.826903	0.806161	-1	0.679935	0.743485	-1	-1	-1	0.759652	0.672831	-1	-1	0.976465	-1	-1	-1	-1	-1	-1	-1	-1	0.682269	-1	-1	0.748647	-1	0	-1	0.730791	-1	-1	-1	-1	-1	-1	0.60905	0.990756	-1	-1	-1	-1	-1	0.720061	-1	-1	-1	-1	0.768422
OLL	0.596037	-1	-1	0.759649	-1	0.874142	-1	-1	-1	1	0.460544	-1	-1	-1	-1	-1	-1	-1	-1	-1	-1	-1	0.643711	0.876146	-1	0.992334	-1	-1	-1	-1	-1	-1	-1	-1	-1	-1	0.725457	-1	-1	-1	-1	-1	-1	-1	-1	-1	-1	-1	0.867658
OLQ	-1	-1	0.890005	-1	-1	0.989847	-1	-1	-1	-1	-1	-1	-1	-1	-1	-1	-1	-1	-1	-1	-1	-1	0	-1	-1	1	-1	0	-1	-1	-1	-1	-1	-1	-1	-1	0.875259	-1	-1	-1	-1	0	-1	-1	-1	-1	-1	-1	0.885755
PHB_and_possibly_PHA	-1	-1	1	-1	-1	0.939685	0.584016	-1	-1	0.977608	-1	-1	0.974272	-1	-1	-1	-1	-1	-1	-1	-1	-1	0.621263	0.79184	-1	0.983653	-1	0	-1	0.736932	-1	-1	-1	-1	0.865436	-1	0.668237	-1	-1	-1	-1	-1	-1	-1	-1	-1	-1	-1	-1
PVP	-1	-1	0.709453	-1	-1	0.619431	0.505455	0.554232	-1	-1	-1	0.742692	-1	-1	-1	-1	-1	-1	-1	-1	-1	-1	0.695567	0.720642	-1	0.8226	-1	0	-1	-1	-1	-1	-1	-1	-1	-1	0.569446	0.886696	-1	0.625561	-1	-1	-1	-1	-1	-1	-1	-1	0.765915
PVQ_and_possibly_PVC	-1	-1	-1	-1	-1	0.898682	-1	-1	-1	-1	-1	-1	0.703795	-1	-1	-1	-1	-1	-1	-1	-1	-1	-1	0.893526	-1	0.925224	0.653496	0	-1	-1	-1	-1	0.768409	0.944836	-1	-1	0	-1	0.701105	-1	0.763308	-1	-1	-1	-1	-1	-1	-1	0.7536
PVR	-1	-1	-1	0.647785	-1	0.657795	-1	-1	-1	0.618675	-1	-1	-1	-1	-1	-1	-1	-1	0.615711	1	-1	-1	0.656985	-1	-1	0.913787	-1	-1	-1	-1	-1	-1	-1	0.955072	-1	-1	0.49616	-1	-1	-1	0.573823	-1	-1	-1	-1	-1	-1	-1	-1
PVT	-1	0.594762	0.464025	-1	-1	0.820324	-1	-1	-1	0.639202	-1	0.563736	-1	-1	-1	-1	-1	-1	-1	-1	-1	-1	-1	-1	-1	0.953936	-1	-1	-1	-1	-1	-1	-1	-1	-1	-1	0.655242	0.562747	-1	0.721396	0	-1	0.531061	-1	-1	-1	-1	-1	0.858723
P_cell	0.865651	-1	0.467277	-1	-1	0.819886	-1	-1	-1	-1	0.733054	0.386697	-1	-1	-1	-1	-1	-1	-1	-1	-1	-1	-1	-1	-1	-1	-1	-1	-1	0.682802	-1	-1	-1	-1	-1	-1	0	-1	0.915225	-1	1	-1	-1	0.665048	-1	-1	-1	-1	0.55371
Pharyngeal_intestinal_valve	-1	-1	0.644427	0.495123	0.694543	0.621767	-1	-1	0.572875	-1	0.465899	-1	-1	-1	-1	-1	-1	-1	-1	-1	-1	0.692624	0.539538	0.55142	-1	-1	-1	0.443175	-1	0	-1	-1	-1	-1	-1	0.790456	0.446163	0.578507	-1	-1	-1	-1	-1	-1	-1	-1	-1	0.477921	0.509161
Pharyngeal_muscle_incomplete_dissociation	-1	-1	-1	-1	-1	-1	-1	-1	0	-1	-1	-1	-1	-1	0	-1	-1	-1	-1	-1	0	-1	-1	-1	-1	-1	-1	-1	-1	0	-1	-1	-1	-1	-1	-1	0	-1	-1	-1	-1	-1	0.745941	-1	1	-1	-1	-1	-1
Possibly_ant_arc_V	-1	-1	-1	-1	-1	1	-1	-1	0.716356	0.979792	0.837919	-1	-1	0.630965	-1	-1	-1	-1	-1	-1	-1	-1	0	0.534481	-1	-1	-1	-1	-1	-1	-1	-1	-1	-1	-1	-1	0.664347	-1	0	-1	-1	-1	0.478447	-1	-1	-1	-1	-1	-1
Possibly_hyp1V	-1	-1	-1	-1	0	0.987843	-1	-1	0	0.990233	0.727038	-1	-1	-1	-1	-1	-1	-1	-1	-1	-1	-1	-1	-1	-1	-1	-1	0	-1	-1	-1	-1	-1	-1	-1	-1	0.629663	-1	-1	0	-1	-1	-1	-1	-1	-1	-1	-1	-1
Posterior_arcade_cell	-1	0.417652	0.752623	-1	0	1	-1	-1	-1	0.544233	-1	-1	-1	0	-1	-1	-1	-1	-1	-1	-1	-1	-1	0	-1	0.773501	-1	0	-1	0	-1	-1	-1	-1	-1	-1	0	0.866199	-1	-1	-1	0	0.913172	0.709572	0.387443	-1	-1	-1	0.519674
RIA	-1	-1	0.740728	-1	-1	0.82173	-1	-1	0.569285	0.760367	-1	1	-1	-1	-1	-1	-1	-1	-1	-1	-1	-1	0.67384	0.832273	-1	0.926651	-1	0	-1	0.784147	-1	-1	-1	-1	0.878109	-1	0.602667	-1	-1	0.641815	-1	-1	-1	-1	-1	-1	0.777354	-1	0.757384
RIB	-1	-1	0.635123	-1	-1	-1	-1	-1	-1	-1	-1	-1	-1	-1	-1	-1	-1	-1	-1	-1	-1	-1	0.728496	-1	0.780196	1	-1	0	0.992587	-1	-1	-1	-1	-1	-1	-1	0.691036	-1	-1	0.607432	-1	-1	-1	-1	-1	-1	0.616772	-1	0.767547
RIC	0.519763	-1	0.667719	-1	-1	0.721928	-1	0.443182	-1	0.661876	0.455957	0.417329	-1	-1	-1	-1	-1	-1	0.484754	-1	-1	-1	-1	0.661877	-1	0.847486	-1	0	-1	0.649673	-1	-1	-1	-1	0.781136	-1	0.487522	-1	0.552588	0.669542	-1	-1	-1	-1	-1	0.680266	-1	-1	0.649226
RID	-1	-1	0.488734	-1	-1	0.726526	-1	-1	-1	-1	-1	-1	-1	-1	-1	-1	-1	-1	-1	-1	-1	-1	-1	-1	-1	0.937162	-1	0	-1	-1	-1	-1	-1	1	-1	-1	0	-1	0	0.495777	0	-1	-1	-1	-1	-1	-1	-1	0.726483
RIH	-1	-1	0.529454	-1	-1	0.628202	-1	-1	-1	-1	0.714542	-1	-1	-1	-1	-1	-1	1	-1	-1	-1	-1	0.725256	-1	-1	0.877386	-1	0	-1	-1	-1	-1	-1	-1	-1	-1	-1	-1	-1	0.639129	-1	-1	-1	-1	-1	-1	0.637829	-1	0.574084
RIM	-1	-1	0.596305	0.662316	-1	0.730722	-1	-1	0.504852	-1	-1	0.466573	-1	-1	-1	-1	-1	-1	-1	-1	-1	-1	0.640407	-1	-1	0.885455	-1	0	-1	-1	-1	-1	-1	0.842858	-1	-1	0	-1	-1	-1	-1	-1	0.694599	-1	0.550336	-1	-1	-1	0.641817
RIS	-1	-1	0.420233	-1	-1	0.777811	-1	-1	0.574674	0.538992	-1	-1	-1	-1	-1	-1	-1	-1	-1	-1	-1	-1	0	0.847995	-1	0.958441	-1	-1	-1	-1	-1	-1	-1	-1	-1	-1	0.522977	-1	-1	0	-1	-1	0.821689	-1	-1	-1	-1	-1	0.726768
RIV	0.566948	-1	0.755538	-1	-1	0.805612	-1	-1	-1	-1	-1	0.696113	-1	-1	-1	-1	-1	0.718859	-1	-1	-1	-1	0.662004	0.85083	-1	0.962557	0.664565	0.450577	-1	-1	-1	-1	-1	0.949997	0.693291	-1	0.614821	-1	-1	-1	-1	0	-1	-1	-1	-1	-1	-1	0.77309
RMD	0.635111	-1	0.790698	-1	-1	-1	-1	-1	0.617345	-1	-1	-1	-1	-1	-1	-1	-1	-1	0.558852	-1	-1	-1	0.671591	0.761273	-1	0.865963	-1	0	0.976465	0.692648	-1	-1	-1	-1	0.724385	-1	0.587009	-1	0.629405	-1	-1	0	-1	-1	-1	-1	0.758964	-1	0.694828
RME	0.488226	-1	0.645361	-1	0.674995	0.689269	-1	0.462521	0.617878	-1	-1	-1	-1	-1	-1	-1	-1	0.779705	-1	-1	-1	-1	0.560395	-1	-1	0.828344	0.665235	0	-1	0.694729	-1	-1	-1	0.831342	-1	-1	0	-1	0.689718	-1	-1	0	-1	-1	-1	-1	0.67322	-1	0.667278
Rectal_gland	-1	-1	-1	-1	-1	1	-1	-1	0.583729	0.44371	0.634987	-1	-1	-1	-1	-1	-1	-1	-1	-1	-1	-1	-1	-1	-1	-1	-1	0	-1	0	-1	-1	-1	-1	0.717904	-1	0	0	-1	0.61649	0	-1	-1	-1	-1	-1	-1	-1	0.463286
SIA	0.680169	0.796568	-1	-1	0.779328	0.745325	-1	-1	-1	0.778754	-1	0.866745	-1	-1	-1	-1	-1	1	-1	-1	-1	-1	0.336636	-1	-1	0.898269	-1	0	-1	-1	-1	-1	-1	-1	-1	-1	0.583941	-1	0.721194	-1	-1	-1	-1	0.84721	-1	-1	-1	-1	0.818889
SIB	-1	-1	-1	-1	-1	0.759166	-1	-1	-1	-1	-1	-1	-1	-1	-1	-1	-1	0.746811	-1	-1	-1	-1	-1	-1	-1	0.943133	0.616413	0	-1	0.766078	-1	-1	-1	-1	-1	-1	0.543386	-1	0.706254	-1	0.573962	0	-1	0.888972	-1	0.80711	-1	-1	0.695486
SMB	0.552581	-1	0.712624	0.789587	-1	-1	-1	-1	-1	-1	-1	0.811402	-1	0.458912	-1	-1	-1	0.984705	-1	-1	-1	-1	0.712076	0.827647	-1	0.908493	-1	0	-1	-1	0.542764	-1	-1	-1	-1	-1	0	-1	-1	0.645721	-1	-1	-1	-1	-1	-1	-1	-1	0.820585
SMD	-1	-1	0.719513	-1	-1	0.838917	-1	-1	0.525826	-1	-1	0.780196	-1	-1	-1	-1	-1	0.686427	0.699467	0.933079	-1	-1	0.661432	0.794766	-1	0.873447	-1	-1	0.80934	-1	-1	-1	-1	-1	0.798901	-1	0.526453	-1	0.641556	-1	0.546198	-1	-1	-1	-1	-1	0.715606	-1	0.673065
Seam_cell	-1	-1	0	-1	-1	1	-1	-1	0.572807	0.816842	0.697973	0	-1	0	-1	-1	-1	-1	-1	-1	-1	-1	-1	-1	-1	-1	-1	0	-1	0.628409	-1	-1	-1	-1	-1	-1	0.543772	-1	0.800973	-1	0.819903	0.699294	0	-1	-1	-1	-1	-1	0.49208
T	-1	-1	-1	-1	-1	0.72891	-1	-1	-1	-1	0	-1	-1	-1	-1	-1	-1	-1	-1	-1	-1	-1	-1	-1	-1	-1	-1	-1	-1	-1	-1	-1	-1	-1	-1	-1	0	-1	1	-1	-1	-1	-1	-1	-1	-1	-1	-1	0.667033
Tail_hypodermis	0.668386	-1	0.43672	-1	-1	1	-1	-1	0.651553	0.896919	0.725588	0.27827	-1	-1	-1	-1	-1	-1	-1	-1	-1	-1	0	-1	-1	-1	-1	-1	-1	0	-1	-1	-1	-1	-1	-1	0.479235	-1	0.77679	0.525723	0.81989	0	0	-1	-1	-1	-1	-1	0.409665
URB_and_possibly_URA	0.607926	-1	-1	0.685853	-1	0.739664	-1	-1	-1	-1	-1	0.480884	-1	-1	-1	-1	-1	-1	0.541836	0.976821	-1	-1	0.700386	-1	-1	0.82972	-1	0	-1	-1	-1	-1	-1	-1	-1	-1	0.636644	-1	0.658659	0.750153	-1	0	-1	-1	-1	-1	-1	-1	0.564075
URX	0.569497	-1	1	-1	-1	0.716111	-1	0.562805	-1	-1	0	-1	-1	-1	-1	-1	-1	-1	-1	-1	-1	-1	-1	0.615826	-1	0.798024	-1	0	-1	-1	-1	-1	-1	-1	-1	-1	0	-1	-1	0	-1	0.347359	-1	-1	-1	-1	-1	-1	0.758347
XXX	-1	-1	0.664312	-1	-1	-1	-1	-1	0.508051	0.728677	0.93854	-1	-1	-1	-1	-1	-1	-1	-1	-1	-1	-1	0.691549	0.728609	-1	0.960694	-1	-1	-1	-1	-1	-1	-1	-1	-1	-1	0.481172	-1	-1	-1	-1	-1	0.64186	-1	-1	-1	-1	-1	0.603516
Y	-1	-1	-1	0.531297	0.452082	0.598175	-1	-1	-1	0.469079	0.595684	-1	-1	-1	-1	-1	-1	-1	-1	-1	-1	-1	0.767161	-1	-1	0.49332	-1	-1	0.719719	0	-1	-1	-1	-1	0	-1	0	-1	0.717994	-1	-1	-1	-1	-1	-1	-1	-1	-1	0.557463
Z1_Z4	-1	0.867464	0.808814	0.664259	0.928562	0.722007	-1	-1	-1	0.627174	0.676532	0.519323	-1	0.70197	-1	-1	-1	-1	-1	-1	-1	-1	0.767975	-1	-1	0.927553	-1	0	-1	0.783826	-1	-1	-1	0.795742	0.521297	-1	0	-1	0	0.810779	-1	0.495728	-1	-1	-1	-1	-1	-1	0.773797
g1A	0	-1	-1	-1	-1	-1	-1	-1	0	-1	-1	-1	-1	0	-1	-1	-1	-1	-1	-1	-1	-1	-1	-1	-1	-1	-1	0	-1	-1	-1	-1	-1	-1	-1	-1	0	-1	-1	-1	-1	-1	-1	-1	-1	-1	-1	-1	-1
g1A_g1P	-1	-1	0.708247	-1	-1	0.745204	-1	-1	-1	-1	-1	-1	-1	0	-1	-1	0.611126	-1	-1	-1	0.530828	-1	-1	-1	-1	0.849033	-1	-1	-1	-1	-1	-1	-1	-1	-1	-1	0.767633	-1	-1	-1	-1	-1	-1	-1	-1	-1	-1	0.853802	0.569545
g1P	-1	-1	-1	-1	-1	0	-1	-1	0	-1	-1	-1	-1	0	-1	-1	-1	-1	-1	-1	-1	-1	0	-1	-1	-1	-1	0	-1	-1	-1	-1	-1	-1	-1	-1	0	-1	-1	-1	0	-1	-1	-1	-1	-1	-1	-1	-1
g2	-1	0.381616	0.680282	0.61318	-1	0.732674	-1	-1	-1	-1	-1	0.70735	-1	-1	-1	-1	-1	-1	-1	-1	-1	-1	0.545868	0.691839	-1	-1	-1	0	0.878202	0.624284	-1	0	-1	-1	-1	0.779679	0.587356	-1	-1	0.575459	-1	-1	-1	-1	-1	-1	-1	0.804273	0.591217
hmc	-1	-1	0	0.602349	-1	0.667277	-1	0.852547	-1	-1	-1	-1	-1	0.822678	-1	-1	-1	-1	-1	-1	-1	-1	0.60918	-1	-1	0.877881	-1	-1	-1	0.801009	-1	-1	-1	-1	-1	0.856262	0	-1	-1	0.688819	-1	-1	-1	-1	-1	-1	-1	-1	0.476595
hmc_and_homolog	-1	-1	0.621691	0.466834	0.921513	0.673212	-1	-1	-1	-1	-1	-1	-1	-1	-1	-1	-1	-1	-1	-1	-1	-1	-1	-1	-1	-1	-1	0	-1	0.788176	-1	-1	-1	-1	-1	0.757974	-1	-1	-1	-1	-1	-1	-1	-1	-1	-1	-1	-1	0.591566
hmc_homolog	-1	-1	0.462414	0.70463	-1	0.70748	-1	-1	-1	0.551829	-1	-1	-1	0.865856	-1	-1	-1	-1	-1	-1	-1	-1	0.74392	-1	-1	-1	-1	0	-1	-1	-1	-1	-1	-1	-1	-1	0	-1	-1	-1	-1	-1	-1	-1	-1	-1	-1	-1	0.495025
hyp1_hyp2	0.599065	-1	0.677241	0	0	0	-1	-1	0.70808	0.440543	1	-1	-1	-1	0.631008	-1	-1	-1	-1	-1	-1	-1	0	0	0.685535	-1	-1	0	-1	0	-1	-1	-1	-1	-1	-1	0.841201	-1	0	-1	-1	0	0	-1	-1	-1	-1	0.766571	0.551364
hyp3	-1	-1	0.614754	-1	-1	0.79719	-1	0.548904	-1	-1	0.843765	-1	-1	-1	-1	-1	-1	-1	0.471593	-1	-1	-1	-1	0.642728	-1	-1	-1	-1	-1	-1	-1	-1	-1	-1	-1	-1	-1	-1	0.830108	-1	-1	-1	-1	-1	-1	-1	-1	-1	0.448597
hyp4_hyp5_hyp6	0.845939	-1	0.558436	-1	-1	0.824781	-1	-1	-1	-1	0.790557	-1	-1	-1	-1	-1	-1	-1	-1	-1	-1	-1	-1	-1	0.652947	-1	-1	-1	-1	-1	-1	-1	-1	-1	-1	-1	0	-1	0.992802	-1	1	-1	-1	0.746261	-1	-1	-1	-1	0.555598
hyp4_to_7_and_P_cells	0.833089	-1	-1	-1	0.66014	-1	-1	-1	0.707148	0.98502	0.769534	-1	-1	-1	-1	-1	-1	-1	-1	-1	-1	-1	-1	-1	-1	-1	-1	-1	-1	-1	-1	-1	-1	-1	-1	-1	0	0	-1	-1	0.959186	-1	-1	-1	-1	-1	-1	-1	0.449426
hyp7_AB_lineage	0.861861	-1	0.48225	-1	-1	0.810283	-1	-1	-1	-1	0.677337	0.487762	-1	-1	-1	-1	-1	-1	-1	-1	-1	-1	-1	-1	-1	-1	-1	-1	-1	0.676407	-1	-1	-1	-1	-1	-1	0	-1	0.95021	-1	1	-1	-1	-1	-1	-1	-1	-1	0.53166
hyp7_C_lineage	0.889978	-1	0	-1	-1	0.79877	-1	-1	-1	-1	0.61569	0.367453	-1	-1	-1	-1	-1	-1	-1	-1	-1	-1	-1	-1	-1	-1	-1	-1	-1	-1	-1	-1	-1	-1	-1	-1	0	-1	0.978662	-1	1	-1	-1	-1	-1	-1	-1	-1	0.553748
mc1	-1	-1	0.683795	0.366575	-1	0.677016	-1	-1	-1	-1	-1	-1	-1	-1	-1	1	-1	-1	-1	-1	0.463907	-1	-1	-1	0.438702	-1	-1	-1	-1	0.553484	-1	-1	-1	-1	-1	-1	0.607819	0.514932	-1	-1	-1	-1	-1	-1	0.677509	-1	-1	0.548601	0.632456
mc1_mc2	-1	-1	0.804059	0.567062	0.734745	0.777292	-1	-1	-1	-1	-1	-1	-1	-1	-1	-1	-1	-1	-1	-1	0.533881	-1	0.666057	-1	0.402829	-1	-1	-1	-1	0.61631	-1	-1	-1	-1	-1	-1	0.559655	-1	-1	-1	-1	-1	-1	-1	0.721689	-1	-1	-1	0.709355
mc2	-1	-1	0.639683	0.53475	-1	0.746712	-1	-1	-1	-1	-1	-1	-1	-1	-1	-1	-1	-1	-1	-1	-1	-1	0.666749	-1	-1	-1	-1	0	-1	-1	-1	-1	-1	-1	-1	-1	0.575954	0.460265	-1	-1	-1	-1	-1	-1	-1	-1	-1	0.815832	0.60006
mc3	0.636703	-1	0.716511	0.319377	-1	0.652551	-1	-1	-1	-1	-1	-1	-1	-1	-1	-1	-1	-1	-1	-1	-1	-1	-1	0.618771	-1	-1	-1	0	-1	0.644569	-1	-1	-1	-1	-1	-1	0.602254	0	-1	-1	-1	0	-1	-1	-1	-1	-1	-1	0.556651
mu_int_mu_anal	-1	0.847008	0	0.576335	-1	0.539457	-1	-1	-1	-1	-1	0.525771	-1	0.900998	-1	-1	-1	-1	-1	-1	0.615335	-1	0	-1	-1	-1	-1	0	-1	0.804665	-1	-1	-1	-1	0.498928	-1	0	-1	-1	0.574821	-1	0	-1	-1	1	-1	-1	0.509551	0.387896
mu_sph	-1	-1	0	0.641583	-1	0.564279	-1	-1	-1	-1	0.688021	0.618739	-1	0.912235	-1	-1	-1	-1	-1	-1	0.638299	-1	-1	0.610367	-1	0	-1	0	-1	0.770327	-1	-1	-1	-1	0.480338	-1	0	-1	-1	0.577063	-1	0	-1	-1	-1	-1	-1	-1	0.51376
pm1_pm2	-1	-1	0.576652	0.546693	-1	0.672844	-1	0.620083	-1	-1	-1	0.884833	-1	-1	-1	1	0.995373	-1	-1	-1	0.762485	-1	0.65531	-1	0.609586	-1	-1	-1	-1	0.687021	-1	-1	-1	-1	-1	-1	0.580587	-1	-1	-1	-1	-1	-1	0.814573	0.696909	-1	-1	0.707601	0.504453
pm3_pm4_pm5	-1	-1	0.790844	0.531253	0.68745	0.556181	-1	-1	-1	-1	-1	0.69758	-1	-1	-1	-1	0.887794	-1	-1	-1	0.523175	-1	0.625272	-1	-1	-1	-1	0	-1	0.658254	-1	-1	-1	-1	-1	-1	0	-1	-1	-1	-1	-1	0.676356	-1	-1	-1	-1	0.591451	0.598385
pm6	-1	-1	0.381821	0.647841	-1	0.656984	-1	-1	-1	-1	-1	-1	-1	-1	-1	-1	-1	-1	-1	-1	-1	-1	0.619607	-1	-1	0.85454	-1	-1	-1	0	-1	-1	-1	-1	-1	-1	0	-1	-1	-1	-1	0	-1	-1	-1	-1	-1	-1	0.597027
pm7	0.565389	-1	0.656203	0	-1	0.588419	-1	-1	-1	-1	-1	0.572078	-1	-1	-1	-1	0.997936	-1	-1	-1	-1	-1	0.564953	-1	-1	-1	-1	0	-1	0.510575	-1	-1	-1	-1	-1	-1	0	-1	-1	-1	-1	-1	-1	-1	0.574404	-1	-1	-1	0.519954
pm8	-1	-1	-1	-1	0.807351	0.695488	-1	-1	-1	-1	-1	-1	-1	0.700774	-1	-1	-1	-1	-1	-1	-1	-1	-1	-1	-1	-1	-1	0	-1	-1	-1	-1	-1	-1	-1	0.853524	0.362039	-1	-1	-1	-1	-1	-1	-1	-1	-1	-1	-1	0.496506
[truncated: 74 more columns]
