# Supplementary material for: Binding profiles for 961DrosophilaandC. eleganstranscription factors reveal tissue-specific regulatory relationships
Source: HighWire-hosted journal article supplement (doi:10.1101/gr.279037.124), 2024-10-22
Supplement: Supplemental_File_S8.xlsx [file Supplemental_File_S8.xlsx]

## Sheet: Legend_Supplemental_File_S8
Supplemental_File_S8. Fly marker gene re-annotation
The unabbreviated column names are given below:
Column names
cell.type.3 - cell type names
gene - gene common name
symbol - flybase name
cell.type.umi - number of unique reads for that cell type
other.n.umi - number of unique reads for all other cell types
cell.type.tpm - transcripts per million for that cell type
other.tpm - transcripts per million for all other cell types
higher.exp - Set 1 means that the cell.type had higher expression than
the other cells combined
log2.ratio - ratio of the log2 of the tpm expression values, using the
higher value as the numerator
heuristic.score - lo2.ratio * log2(cell.type.tpm

## Sheet: Fly marker genes v11 annotation
cell.type.3	gene	symbol	cell.type.n.umi	other.n.umi	cell.type.tpm	other.tpm	higher.expr	log2.ratio	heuristic.score	stage1-3	stage4-6	stage7-8	stage9-10	stage11-12	stage13-16
Amnioserosa	CG12011	CG12011	80450	15860	30896.1	548.683	Set 1	5.81268	86.6972	cat_term:global_finito	list_4-6:no staining no staining	no staining	amnioserosa amnioserosa PR	amnioserosa	amnioserosa apoptotic amnioserosa
Amnioserosa	CG18088	CG18088	6923	707	2489.86	24.7722	Set 1	6.5941	74.3975	cat_term:global_finito	list_4-6:no staining no staining	list_7-8:no staining no staining	amnioserosa no staining	amnioserosa	amnioserosa
Amnioserosa	fipi	CG15630	5468	1329	2089.37	58.1206	Set 1	5.14326	56.7278	no staining	no staining	no staining	no staining	no staining	amnioserosa
Amnioserosa	CG45263	CG45263	32169	16465	11085.3	719.064	Set 1	3.94438	52.9987	cat_term:global_finito no staining	no staining	amnioserosa A dors ectoderm PR list_7-8:specific no staining	amnioserosa PR dors ectoderm PR no staining	amnioserosa cat_term:finito11-12 no staining	amnioserosa antennal sense organ cat_term:finito13-16 cat_term:global_finito dors epidermis dors vessel dors/lateral sensory complexes no staining sensory nervous sys PR sensory sys head vent midline
Amnioserosa	CG7997	CG7997	5571	2104	2074.25	82.8315	Set 1	4.62896	51.0068	cat_term:global_finito maternal	apically cleared cellular blastoderm list_4-6:ubiquitous maternal	list_7-8:no staining no staining	amnioserosa no staining	amnioserosa	adult foregut precursor adult hindgut precursor amnioserosa dors trunk foregut hindgut proventriculus tracheal sys
Amnioserosa	C15	CG7937	2446	636	871.17	25.4776	Set 1	5.04011	49.2342	cat_term:global_finito no staining	amnioserosa AISN dors ectoderm AISN	amnioserosa A dors ectoderm PR	amnioserosa PR dors epidermis A	amnioserosa dors epidermis PR	amnioserosa brain dors epidermis vent nerve cord
Amnioserosa	tup	CG10619	17384	9952	5949.67	422.75	Set 1	3.81152	47.7921	cat_term:global_finito maternal no staining	amnioserosa AISN cellular blastoderm clypeolabrum AISN dors ectoderm AISN list_4-6:specific no staining procephalic ectoderm AISN subset	amnioserosa A clypeolabrum A dors ectoderm PR list_7-8:specific no staining procephalic ectoderm A	amnioserosa amnioserosa PR clypeolabrum PR dors ectoderm PR head epidermis lateral PR no staining procephalic ectoderm PR vent nerve cord PR P3	amnioserosa brain PR clypeo-labral PR dors epidermis PR dors vessel SA foregut PR leading edge cell SA no staining stomatogastric nervous sys PR vent nerve cord PR	brain cat_term:any_neural cat_term:subset_CNS central brain neuron central nervous sys clypeolabrum dors epidermis dors vessel esophageal ganglion esophagus foregut frontal ganglion head epidermis hypocerebral ganglion lateral cord glia lateral cord neuron no staining proventricular ganglion stomatogastric nervous sys vent nerve cord
Amnioserosa	C1GalTA	CG9520	5018	2362	1726.26	99.8764	Set 1	4.09699	44.0602	cat_term:global_finito maternal	list_4-6:no staining no staining	no staining	amnioserosa amnioserosa PR head mesoderm PR	amnioserosa	amnioserosa brain crystal cell vent nerve cord
Amnioserosa	Doc2	CG5187	3370	1193	1147.75	47.7741	Set 1	4.55654	46.3211	cat_term:global_finito flag_for_volker no staining	amnioserosa AISN dors ectoderm AISN hindgut AISN list_4-6:specific procephalic ectoderm AISN subset visual AISN	amnioserosa A dors ectoderm PR hindgut A list_7-8:specific procephalic ectoderm A visual A	amnioserosa amnioserosa PR dors ectoderm PR head epidermis lateral PR inclusive hindgut PR procephalic ectoderm PR visual PR	amnioserosa cardiac mesoderm PR clypeo-labral PR dors epidermis PR hindgut proper PR longitudinal visceral mesoderm PR post spiracle SA vent epidermis PR visceral muscle PR	adult eye PR circulatory sys dors epidermis head epidermis hindgut Malpighian tubule vent epidermis
Amnioserosa	CG5399	CG5399	1885	799	635.238	32.6763	Set 1	4.23749	39.4656	flag_for_volker no staining	no staining	no staining	no staining	amnioserosa	midgut chamber proventriculus
Amnioserosa	Pgant9	CG30463	14425	11168	4841.73	507.393	Set 1	3.25151	39.8036	NA	NA	NA	NA	NA	amnioserosa
Amnioserosa	ush	CG2762	6862	6302	2435.02	278.532	Set 1	3.12285	35.133	cat_term:global_finito	amnioserosa AISN cellular blastoderm dors ectoderm AISN list_4-6:specific subset yolk nuclei	amnioserosa A dors ectoderm PR head mesoderm PR list_7-8:specific procephalic ectoderm A yolk nuclei	amnioserosa PR dors ectoderm PR head mesoderm PR	amnioserosa antennal PR1 dors epidermis PR head mesoderm PR	brain cat_term:any_neural cat_term:subset_CNS dors epidermis garland cell head epidermis midgut sensory nervous sys PR sensory sys head vent midline vent nerve cord
Amnioserosa	MFS15	CG15094	1908	1390	715.483	55.667	Set 1	3.65834	34.6985	maternal ubiquitous	faint ubiquitous list_4-6:ubiquitous ubiquitous	faint ubiquitous list_7-8:ubiquitous ubiquitous	amnioserosa faint ubiquitous ubiquitous	amnioserosa plasmatocytes A salivary gland body PR salivary gland PR ubiquitous	amnioserosa cat_term:global_finito plasmatocytes salivary gland ubiquitous
Amnioserosa	retn	CG5403	2803	2152	972.279	85.348	Set 1	3.49314	34.6753	cat_term:global_finito maternal	gap procephalic ectoderm AISN rapidly degraded subset ubiquitous	amnioserosa A dors ectoderm PR head mesoderm PR procephalic ectoderm A trunk mesoderm PR	amnioserosa PR head mesoderm PR no staining trunk mesoderm PR	amnioserosa foregut PR head mesoderm PR hindgut proper PR no staining stomatogastric nervous sys PR trunk mesoderm PR	amnioserosa dors prothoracic pharyngeal muscle foregut head epidermis hindgut hypopharynx muscle sys stomatogastric nervous sys
Hindgut_proper_PR_analpad_SA	CG17782	CG17782	393	82	1294.68	3.37199	Set 1	8.21009	84.8882	no staining	no staining	no staining	no staining	no staining	anal pad
Hindgut_proper_PR_analpad_SA	CG17780	CG17780	348	308	1119.96	12.9981	Set 1	6.32207	64.0459	cat_term:global_finito	list_4-6:no staining no staining	list_7-8:no staining no staining	no staining	no staining	anal pad hindgut large intestine
Hindgut_proper_PR_analpad_SA	CG17999	CG17999	94	55	308.917	2.58704	Set 1	6.42828	53.1988	cat_term:global_finito	list_4-6:no staining no staining	list_7-8:no staining no staining	no staining	no staining	anal pad
Hindgut_proper_PR_analpad_SA	otp	CG10036	1379	4889	4550.39	231.246	Set 1	4.29226	52.16	cat_term:global_finito maternal no staining	list_4-6:no staining no staining	hindgut A list_7-8:specific no staining	inclusive hindgut PR no staining	anal pad SA brain PR hindgut proper PR large intestine SA no staining vent nerve cord PR	anal pad brain hindgut large intestine no staining vent nerve cord vent sensory complex PR
Hindgut_proper_PR_analpad_SA	Lgr1	CG7665	217	372	708.191	15.4253	Set 1	5.43015	51.4237	cat_term:global_finito	list_4-6:no staining no staining	list_7-8:no staining no staining	no staining	anal pad SA rectum SA	anal pad proventriculus proventriculus inner layer rectum
Hindgut_proper_PR_analpad_SA	dysf	CG32474	299	917	988.072	42.2152	Set 1	4.51501	44.924	cat_term:global_finito maternal	no staining	no staining	no staining	anal pad SA atrium PR cardiac mesoderm PR clypeo-labral PR large intestine SA tracheal PR	anal pad atrium dors vessel epipharynx large intestine leading edge cell tracheal sys
Large_intestine_border_cells_analpad	Tsp74F	CG5492	1208	958	4738.95	35.6962	Set 1	7.01279	85.6308	cat_term:global_finito maternal	list_4-6:no staining rapidly degraded	no staining	cat_term:finito9-10 no staining	no staining	adult foregut precursor adult salivary PR anal pad atrium epipharynx head epidermis hindgut hypopharynx large intestine proventriculus salivary gland duct
Large_intestine_border_cells_analpad	bond	CG6921	683	424	2769	15.6894	Set 1	7.37429	84.3299	cat_term:global_finito	list_4-6:no staining no staining	list_7-8:no staining no staining	cat_term:finito9-10 dors ectoderm PR no staining	corpus allatum PR dors epidermis PR large intestine SA salivary duct PR	corpus allatum dors apodeme foregut hindgut large intestine oenocyte proventriculus proventriculus intermediate layer salivary gland duct
Large_intestine_border_cells_analpad	CG2157	CG2157	445	444	1807.18	14.9752	Set 1	6.82176	73.8136	cat_term:global_finito no staining	list_4-6:no staining no staining	list_7-8:no staining no staining	cat_term:finito9-10 no staining	no staining	adult salivary PR anal pad epipharynx head epidermis hypopharynx large intestine post spiracle vent epidermis
Large_intestine_border_cells_analpad	CG7179	CG7179	203	202	757.001	6.94952	Set 1	6.57328	62.8804	cat_term:global_finito	list_4-6:no staining no staining	list_7-8:no staining no staining	cat_term:finito9-10 no staining	cat_term:finito11-12 no staining	adult hindgut precursor anal pad cat_term:finito13-16 hindgut large intestine proventriculus salivary gland common duct salivary gland duct vent epidermis
Large_intestine_border_cells_analpad	CG13216	CG13216	184	204	726.964	8.57874	Set 1	6.2459	59.3843	NA	NA	NA	NA	NA	anal pad cat_term:global_finito vent epidermis
Large_intestine_border_cells_analpad	CG13285	CG13285	99	116	382.887	3.29365	Set 1	6.47857	55.6155	NA	NA	NA	NA	NA	NA
Large_intestine_border_cells_analpad	CG15905	CG15905	125	198	501.007	8.29055	Set 1	5.75293	51.6127	NA	NA	NA	NA	NA	NA
Large_intestine_border_cells_analpad	swi2	CG14485	74	89	270.341	3.44756	Set 1	5.92562	47.9025	NA	NA	NA	NA	NA	NA
Large_intestine_border_cells_analpad	Osi14	CG1155	1449	8386	5573.59	349.058	Set 1	3.99294	49.6908	cat_term:global_finito	list_4-6:no staining no staining	list_7-8:no staining no staining	cat_term:finito9-10 no staining	no staining	anal pad dors epidermis esophagus head epidermis head epidermis dors hypopharynx large intestine proventriculus proventriculus inner layer proventriculus intermediate layer salivary gland duct vent epidermis
Large_intestine_border_cells_analpad	CG5070	CG5070	59	143	232.956	4.59219	Set 1	5.3805	42.3451	no staining	no staining	no staining	no staining	no staining	no staining
Large_intestine_border_cells_analpad	Sox100B	CG15552	85	153	341.433	6.3348	Set 1	5.5407	46.6509	cat_term:global_finito no staining	no staining	no staining	no staining	anal pad SA ant adult midgut precursors PR hindgut proper PR Malpighian tubule PR post adult midgut precursors PR	anal pad ant adult midgut precursors hindgut post adult midgut precursors
Large_intestine_border_cells_analpad	CG9269	CG9269	50	119	203.406	4.05121	Set 1	5.33159	40.9215	NA	NA	NA	NA	NA	NA
Large_intestine_border_cells_analpad	chas	CG32556	334	2305	1311.41	89.5398	Set 1	3.85642	39.9448	cat_term:global_finito maternal no staining	no staining	no staining	no staining	dors epidermis PR foregut PR hindgut proper PR vent epidermis PR	atrium dors epidermis epipharynx foregut head epidermis head epidermis dors hindgut no staining rectum sensory sys head vent epidermis
Large_intestine_border_cells_analpad	wat	CG1443	290	2007	1150.34	87.6338	Set 1	3.69805	37.6058	NA	NA	NA	NA	NA	NA
Large_intestine_border_cells_analpad	ATP8A	CG42321	283	1775	1123.07	78.6783	Set 1	3.81712	38.6846	cat_term:global_finito flag_for_volker maternal	list_4-6:no staining no staining ubiquitous	no staining ubiquitous	hindgut proper A no staining ubiquitous vent nerve cord PR P3	hindgut proper PR no staining ubiquitous vent nerve cord PR	brain central nervous sys dors/lateral sensory complexes faint ubiquitous hindgut large intestine Malpighian tubule ubiquitous vent nerve cord
Large_intestine_border_cells_analpad	ple	CG10118	165	1251	633.241	44.2941	Set 1	3.80536	35.4237	cat_term:global_finito	list_4-6:no staining no staining	list_7-8:no staining no staining	cat_term:finito9-10 no staining	cat_term:finito11-12 no staining	anal pad atrium cat_term:finito13-16 dors epidermis epipharynx foregut hindgut hypopharynx proventriculus vent epidermis vent midline
Large_intestine_border_cells_analpad	rgn	CG6014	148	1059	567.95	40.2861	Set 1	3.78204	34.6138	cat_term:global_finito no staining	no staining	no staining	no staining	no staining	no staining
Large_intestine_border_cells_analpad	CG14626	CG14626	92	463	371.102	19.3152	Set 1	4.19118	35.7908	cat_term:global_finito maternal ubiquitous	list_4-6:ubiquitous ubiquitous	list_7-8:ubiquitous ubiquitous	ubiquitous	ubiquitous	anal pad atrium dors apodeme dors epidermis epipharynx foregut hindgut hypopharynx labral sensory complex lateral cord glia proventriculus ubiquitous vent apodeme vent epidermis vent midline vent nerve cord
Large_intestine_border_cells_analpad	CG43373	CG43373	82	440	350.227	20.3618	Set 1	4.03519	34.1226	NA	NA	NA	NA	NA	NA
Large_intestine_border_cells_analpad	CG7720	CG7720	499	4515	1858.54	213.216	Set 1	3.11703	33.8532	NA	list_4-6:no staining no staining	list_7-8:no staining no staining	cat_term:finito9-10 no staining	large intestine SA	cat_term:global_finito dors epidermis large intestine vent epidermis
Sense_organs	nompA	CG13207	1804	1328	7374.6	53.4764	Set 1	7.08079	90.9778	NA	list_4-6:no staining	NA	NA	NA	cat_term:global_finito dors/lateral sensory complexes labial sensory complex sensory sys head vent sensory complex PR
Sense_organs	CG12911	CG12911	951	554	3789.3	21.2476	Set 1	7.41214	88.1162	maternal	list_4-6:ubiquitous ubiquitous	list_7-8:ubiquitous	NA	NA	cat_term:global_finito dors/lateral sensory complexes head epidermis labial sensory complex labral sensory complex maxillary sensory complex sensory nervous sys PR sensory sys head vent sensory complex PR
Sense_organs	CG13318	CG13318	214	92	859.082	2.78308	Set 1	7.82709	76.3011	cat_term:global_finito	list_4-6:no staining no staining	no staining	no staining	no staining	antennal sense organ central brain labial sensory complex labral sensory complex sensory sys head
Sense_organs	CG12869	CG12869	229	139	928.754	5.49359	Set 1	7.16014	70.604	cat_term:global_finito no staining	list_4-6:no staining no staining	list_7-8:no staining no staining	no staining	no staining	antennal sense organ hypopharyngeal sense organ labial sensory complex labral sensory complex sensory sys head vent epidermis vent sensory complex PR
Sense_organs	sv	CG11049	1089	2528	4236.46	112.142	Set 1	5.22665	62.9759	cat_term:global_finito no staining	no staining	no staining	no staining	antennal PR1 dors epidermis PR dors/lateral sensory complexes PR labial sensory complex PR labral sensory complex PR maxillary sensory complex PR sensory nervous sys SA vent sensory complex SA	antennal sense organ dors/lateral sensory complexes labial sensory complex labral sensory complex maxillary sensory complex sensory nervous sys PR vent sensory complex PR
Sense_organs	CG13305	CG13305	92	142	395.226	5.68117	Set 1	5.88643	50.801	no staining	list_4-6:no staining no staining	no staining	no staining	no staining	brain cat_term:global_finito central brain glia central brain mushroom body central nervous sys dors/lateral sensory complexes lateral cord glia sensory nervous sys PR sensory sys head vent nerve cord vent sensory complex PR
Sense_organs	cpo	CG43738	4173	38920	16331.9	1671.56	Set 1	3.28757	46.0112	cat_term:global_finito no staining	list_4-6:no staining no staining	no staining	cat_term:finito9-10 no staining	dors/lateral sensory complexes PR labial sensory complex PR maxillary sensory complex PR no staining sensory nervous sys SA vent sensory complex SA	antennal sense organ dors/lateral sensory complexes foregut sensory structure head epidermis labial sensory complex maxillary sensory complex no staining ring gland sensory nervous sys PR sensory sys head
Sense_organs	pros	CG17228	941	6461	3635.98	245.478	Set 1	3.88281	45.9279	cat_term:global_finito no staining	AISN cellular blastoderm ectoderm AISN list_4-6:specific procephalic ectoderm AISN subset ubiquitous vent ectoderm AISN	list_7-8:specific procephalic ectoderm A vent ectoderm PR	procephalic ectoderm PR vent nerve cord PR P3 visual PR	(larval eye PR) ant midgut PR brain PR central brain glia central brain neuron dors/lateral sensory complexes PR ganglion mother cell labial sensory complex PR labral sensory complex PR lateral cord glia lateral cord neuron maxillary sensory complex PR midline PR neuroblasts of vent nervous sys post midgut PR procephalic neuroblasts sensory nervous sys SA vent midline neuroblast vent nerve cord P…	adult midgut precursor Bolwig's organ brain cat_term:any_neural cat_term:PNS cat_term:subset_CNS central brain glia central brain surface glia central nervous sys dors/lateral sensory complexes foregut sensory structure garland cell labial sensory complex labral sensory complex lateral cord glia leading edge cell maxillary sensory complex sensory nervous sys PR sensory sys head vent midline vent …
Sense_organs	CAP	CG18408	720	5246	2864.41	198.193	Set 1	3.846	44.1695	cat_term:global_finito flag_for_volker maternal no staining	list_4-6:no staining maternal no staining	list_7-8:no staining no staining ubiquitous	no staining ubiquitous	garland cell PR no staining ubiquitous	amnioserosa dors vessel dors/lateral sensory complexes garland cell head epidermis no staining sensory nervous sys PR ubiquitous vent sensory complex PR visceral muscle
Sense_organs	CG17572	CG17572	58	139	223.228	6.40515	Set 1	4.91385	38.3713	cat_term:global_finito	list_4-6:no staining no staining	list_7-8:no staining no staining	no staining	no staining	antennal sense organ muscle sys post spiracle sensory sys head
Sense_organs	Dll	CG3629	190	1233	747.545	50.6922	Set 1	3.85414	36.7991	cat_term:global_finito maternal no staining	central brain AISN faint ubiquitous head epidermis dors AISN no staining procephalic ectoderm AISN visual AISN	antennal PR A central brain A clypeolabrum A head epidermis dors A head epidermis lateral A no staining visual A	antennal PR2 central brain PR P3 clypeolabrum PR head epidermis dors PR head epidermis lateral PR no staining visual PR	(larval eye PR) antennal PR1 brain PR clypeo-labral PR head epidermis PR P1 labial sensory complex PR maxillary sensory complex PR no staining vent imaginal precursor SA	brain head epidermis no staining sensory sys head vent imaginal precursor vent nerve cord
Sense_organs	bdl	CG16857	40	165	177.096	5.89331	Set 1	4.68319	35.014	cat_term:global_finito	list_4-6:no staining no staining	no staining	no staining	no staining	dors epidermis dors/lateral sensory complexes
Bolwig_s_organ	Arr1	CG5711	29	10	577.547	0.334615	Set 1	8.75737	80.3602	cat_term:global_finito	list_4-6:no staining no staining	list_7-8:no staining no staining	no staining	no staining	Bolwig's organ
Bolwig_s_organ	Rh6	CG5192	28	22	647.791	0.854212	Set 1	8.44858	78.9233	cat_term:global_finito no staining	no staining	no staining	no staining	no staining	no staining
Bolwig_s_organ	Gbeta76C	CG8770	24	14	489.041	0.488533	Set 1	8.35992	74.7106	cat_term:global_finito no staining	list_4-6:no staining no staining	no staining	no staining	no staining	Bolwig's organ no staining
Bolwig_s_organ	ninaB	CG9347	12	8	314.847	0.289033	Set 1	7.93222	65.8618	cat_term:global_finito	list_4-6:no staining no staining	list_7-8:no staining no staining	no staining	no staining	Bolwig's organ
Bolwig_s_organ	ninaA	CG3966	4	6	95.5694	0.192756	Set 1	6.32418	41.6984	cat_term:global_finito	list_4-6:no staining no staining	no staining	NA	no staining	Bolwig's organ
Bolwig_s_organ	chp	CG1744	3	40	81.7009	1.74072	Set 1	4.89772	31.1977	NA	NA	list_7-8:no staining	NA	NA	Bolwig's organ cat_term:global_finito
Brain_and_ventral_nerve_cord_2	Df31	CG2207	20541	23179	2784.65	845.62	Set 1	1.71771	19.6571	maternal	maternal	list_7-8:ubiquitous	NA	brain PR ubiquitous vent nerve cord PR	brain cat_term:global_finito central nervous sys sensory nervous sys PR ubiquitous vent nerve cord
Brain_and_ventral_nerve_cord_2	fax	CG4609	48480	73385	7146.55	2634.77	Set 1	1.43902	18.4241	no staining	no staining	no staining	no staining	no staining	salivary gland
Brain_and_ventral_nerve_cord_2	CG42232	CG42232	3515	2985	476.734	112.164	Set 1	2.07477	18.4656	maternal pole plasm	list_4-6:specific pole cell pole plasm ubiquitous	ant endoderm A head mesoderm PR list_7-8:specific pole cell post endoderm PR trunk mesoderm PR ubiquitous vent nerve cord A	ant endoderm PR central brain PR P3 foregut PR germ cell head mesoderm PR inclusive hindgut PR post endoderm PR trunk mesoderm PR ubiquitous vent nerve cord PR P3	brain PR cat_term:finito11-12 faint ubiquitous germ cell neuroblasts of vent nervous sys procephalic neuroblasts vent nerve cord PR	brain cat_term:finito13-16 cat_term:global_finito central brain neuron central nervous sys gonad lateral cord neuron neuroblasts of central brain neuroblasts of vent nervous sys vent nerve cord
Brain_and_ventral_nerve_cord_2	stg	CG1395	10193	11616	1493.2	454.943	Set 1	1.71148	18.0479	cat_term:finito1-3 maternal	cat_term:finito4-6 list_4-6:specific subset ubiquitous	cat_term:finito7-8 list_7-8:specific ubiquitous	cat_term:finito9-10 ubiquitous	cat_term:global_finito ubiquitous	brain cat_term:global_finito circulatory sys midgut vent nerve cord
Brain_and_ventral_nerve_cord_2	akirin	CG8580	12076	14534	1699.86	546.909	Set 1	1.63341	17.5298	maternal no staining	no staining	no staining	no staining	no staining	no staining
Brain_and_ventral_nerve_cord_2	dap	CG1772	4776	4809	681.856	189.238	Set 1	1.84166	17.34	cat_term:global_finito maternal	amnioserosa AISN ant endoderm AISN endoderm AISN list_4-6:specific pole cell pole plasm	amnioserosa A vent ectoderm PR	amnioserosa PR vent ectoderm PR	amnioserosa ant midgut PR dors epidermis PR post midgut PR tracheal PR vent epidermis PR	brain dors/lateral sensory complexes midgut sensory sys head vent nerve cord vent sensory complex PR
Brain_and_ventral_nerve_cord_2	Mapmodulin	CG5784	5003	5483	710.623	212.517	Set 1	1.73474	16.4366	maternal strong ubiquitous	strong ubiquitous	strong ubiquitous	strong ubiquitous	brain PR strong ubiquitous vent nerve cord PR	brain faint ubiquitous gonad vent nerve cord
Brain_and_ventral_nerve_cord_2	CNBP	CG3800	22855	34197	3333.85	1266.64	Set 1	1.39504	16.3267	maternal	list_4-6:ubiquitous ubiquitous	list_7-8:ubiquitous ubiquitous	ubiquitous	ant midgut PR brain PR head mesoderm PR post midgut PR trunk mesoderm PR ubiquitous vent nerve cord PR	brain cat_term:global_finito cat_term:true_ubiquitous dors prothoracic pharyngeal muscle midgut muscle sys ubiquitous vent nerve cord
Brain_and_ventral_nerve_cord_2	Lam	CG6944	8829	11635	1282.36	425.126	Set 1	1.58945	16.4122	cat_term:finito1-3 cat_term:global_finito maternal	cat_term:finito4-6 cellular blastoderm list_4-6:ubiquitous maternal ubiquitous	cat_term:finito7-8 list_7-8:ubiquitous ubiquitous	cat_term:finito9-10 ubiquitous	cat_term:finito11-12 ubiquitous	cat_term:finito13-16 ubiquitous
Brain_and_ventral_nerve_cord_2	CycB	CG3510	6081	7071	831.324	267.767	Set 1	1.62906	15.8035	cat_term:global_finito maternal	cellular blastoderm list_4-6:specific ubiquitous	list_7-8:specific ubiquitous	dors ectoderm PR procephalic ectoderm PR ubiquitous vent ectoderm PR	brain PR dors epidermis PR tracheal PR	brain cat_term:any_neural cat_term:subset_CNS central brain mushroom body central nervous sys lymph gland vent nerve cord
Brain_and_ventral_nerve_cord_2	CycB3	CG5814	3560	3468	495.091	132.513	Set 1	1.89071	16.9303	cat_term:global_finito maternal	cellular blastoderm list_4-6:ubiquitous ubiquitous vent ectoderm AISN	list_7-8:ubiquitous procephalic ectoderm A ubiquitous vent ectoderm PR vent nerve cord A visual A	procephalic ectoderm PR ubiquitous vent ectoderm PR visual PR	brain PR dors/lateral sensory complexes PR gnathal PR ubiquitous vent epidermis PR vent nerve cord PR vent sensory complex SA	brain cat_term:any_neural cat_term:common_C central brain glia central brain neuron central brain surface glia central nervous sys lateral cord glia lateral cord neuron lateral cord surface glia vent nerve cord
Brain_and_ventral_nerve_cord_2	Ppa	CG9952	12590	16619	1813.1	655.206	Set 1	1.46624	15.8721	cat_term:global_finito	clypeolabrum AISN dors ectoderm AISN list_4-6:specific procephalic ectoderm AISN subset ubiquitous vent ectoderm AISN	clypeolabrum A dors ectoderm PR list_7-8:specific procephalic ectoderm A ubiquitous vent ectoderm PR	clypeolabrum PR dors ectoderm PR procephalic ectoderm PR ubiquitous vent ectoderm PR	central brain glia central brain neuron clypeo-labral PR dors epidermis PR trunk mesoderm PR ubiquitous	brain cat_term:any_neural cat_term:pan_CNS central nervous sys dors epidermis dors prothoracic pharyngeal muscle epipharynx hypopharynx midgut muscle sys sensory nervous sys PR ubiquitous vent epidermis vent nerve cord
Brain_and_ventral_nerve_cord_2	sti	CG10522	2276	2342	340.099	87.6465	Set 1	1.93982	16.3217	cat_term:finito1-3 cat_term:global_finito maternal	cat_term:finito4-6 cellular blastoderm list_4-6:ubiquitous ubiquitous	cat_term:finito7-8 faint ubiquitous	cat_term:finito9-10 faint ubiquitous procephalic ectoderm PR vent nerve cord PR P3	brain PR cat_term:finito11-12 faint ubiquitous neuroblasts of vent nervous sys procephalic neuroblasts vent nerve cord PR	brain cat_term:any_neural cat_term:common_C cat_term:finito13-16 neuroblasts of central brain neuroblasts of vent nervous sys sensory sys head vent nerve cord
Brain_and_ventral_nerve_cord_2	RhoGEF4	CG8606	1426	1265	207.606	46.6491	Set 1	2.12333	16.3595	cat_term:global_finito maternal	cellular blastoderm list_4-6:ubiquitous maternal	list_7-8:ubiquitous procephalic ectoderm A ubiquitous	procephalic ectoderm PR ubiquitous vent nerve cord PR P3	brain PR central brain glia central brain neuron central brain surface glia lateral cord glia lateral cord neuron lateral cord surface glia neuroblasts of vent nervous sys procephalic neuroblasts ubiquitous vent nerve cord PR	brain cat_term:any_neural central brain surface glia central nervous sys lateral cord neuron lateral cord surface glia vent nerve cord
Brain_and_ventral_nerve_cord_2	feo	CG11207	1680	1581	227.477	58.6925	Set 1	1.9301	15.1241	cat_term:global_finito maternal	apically cleared list_4-6:specific pole plasm ubiquitous yolk	hindgut A list_7-8:specific trunk mesoderm PR ubiquitous	ant endoderm PR faint ubiquitous head mesoderm PR inclusive hindgut PR post endoderm PR trunk mesoderm PR	ant midgut PR brain PR faint ubiquitous head mesoderm PR hindgut proper PR post midgut PR proventriculus PR trunk mesoderm PR vent nerve cord PR	brain central brain glia central brain neuron central nervous sys lateral cord glia lateral cord neuron vent nerve cord
Brain_and_ventral_nerve_cord_2	aqz	CG9821	37375	65627	5594.67	2381.88	Set 1	1.23135	15.3304	cat_term:global_finito maternal no staining	no staining	no staining	no staining	no staining	no staining
Brain_and_ventral_nerve_cord_2	l(3)neo38	CG6930	26377	41113	3849.29	1607.79	Set 1	1.25862	14.9911	cat_term:global_finito flag_for_volker no staining	faint ubiquitous head mesoderm AISN list_4-6:specific trunk mesoderm AISN ubiquitous yolk nuclei	ant endoderm A head mesoderm PR list_7-8:specific post endoderm PR trunk mesoderm PR ubiquitous vent ectoderm PR vent nerve cord A yolk nuclei	ant endoderm PR foregut PR head mesoderm PR inclusive hindgut PR post endoderm PR procephalic ectoderm PR trunk mesoderm PR ubiquitous vent ectoderm PR vent nerve cord PR P3 yolk nuclei	ant midgut PR brain PR dors epidermis PR foregut PR head mesoderm PR hindgut proper PR lateral cord glia lateral cord neuron post midgut PR trunk mesoderm PR ubiquitous vent epidermis PR vent nerve cord PR	brain cat_term:any_neural cat_term:pan_CNS cat_term:PNS central brain neuron central nervous sys dors epidermis dors/lateral sensory complexes faint ubiquitous lateral cord neuron sensory nervous sys PR sensory sys head vent epidermis vent nerve cord vent sensory complex PR
Brain_and_ventral_nerve_cord_2	Hrb27C	CG10377	25722	42460	3803.31	1594.19	Set 1	1.25352	14.9087	cat_term:global_finito maternal	maternal	ubiquitous	ubiquitous	ubiquitous	ubiquitous
Brain_and_ventral_nerve_cord_2	Amun	CG2446	8203	11668	1203.94	432.033	Set 1	1.47522	15.0985	no staining	no staining	no staining	no staining	no staining	no staining
Brain_and_ventral_nerve_cord_2	Oatp58Dc	CG3380	1884	1945	259.862	68.4896	Set 1	1.90288	15.2747	cat_term:global_finito no staining	list_4-6:no staining no staining yolk nuclei	list_7-8:specific no staining yolk nuclei	yolk nuclei	yolk nuclei	amnioserosa yolk nuclei
Brain_and_ventral_nerve_cord_1	Brd	CG3096	1643	736	215.865	31.804	Set 1	2.71819	21.0949	NA	NA	NA	NA	NA	NA
Brain_and_ventral_nerve_cord_1	RhoGEF4	CG8606	1446	1354	238.65	43.4673	Set 1	2.42408	19.1618	cat_term:global_finito maternal	cellular blastoderm list_4-6:ubiquitous maternal	list_7-8:ubiquitous procephalic ectoderm A ubiquitous	procephalic ectoderm PR ubiquitous vent nerve cord PR P3	brain PR central brain glia central brain neuron central brain surface glia lateral cord glia lateral cord neuron lateral cord surface glia neuroblasts of vent nervous sys procephalic neuroblasts ubiquitous vent nerve cord PR	brain cat_term:any_neural central brain surface glia central nervous sys lateral cord neuron lateral cord surface glia vent nerve cord
Brain_and_ventral_nerve_cord_1	HmgD	CG17950	9792	11032	1486.2	401.836	Set 1	1.88337	19.8477	maternal no staining strong ubiquitous	no staining ubiquitous	no staining ubiquitous	central brain PR P3 faint ubiquitous no staining ubiquitous vent nerve cord PR P3	brain PR faint ubiquitous no staining ubiquitous vent nerve cord PR	brain dors/lateral sensory complexes epipharynx faint ubiquitous foregut hindgut hypopharynx midgut no staining sensory sys head vent nerve cord vent sensory complex PR
Brain_and_ventral_nerve_cord_1	CycB3	CG5814	3515	3813	551.334	135.548	Set 1	2.01352	18.3419	cat_term:global_finito maternal	cellular blastoderm list_4-6:ubiquitous ubiquitous vent ectoderm AISN	list_7-8:ubiquitous procephalic ectoderm A ubiquitous vent ectoderm PR vent nerve cord A visual A	procephalic ectoderm PR ubiquitous vent ectoderm PR visual PR	brain PR dors/lateral sensory complexes PR gnathal PR ubiquitous vent epidermis PR vent nerve cord PR vent sensory complex SA	brain cat_term:any_neural cat_term:common_C central brain glia central brain neuron central brain surface glia central nervous sys lateral cord glia lateral cord neuron lateral cord surface glia vent nerve cord
Brain_and_ventral_nerve_cord_1	Tom	CG5185	4561	4110	691.947	164.905	Set 1	2.0603	19.4423	no staining	dors ectoderm AISN procephalic ectoderm AISN	dors ectoderm PR procephalic ectoderm A	dors ectoderm PR procephalic ectoderm PR tracheal sys A	dors epidermis PR head epidermis dors PR P1 tracheal PR	clypeolabrum dors epidermis dors histoblast nest abdominal dors imaginal precursor head epidermis head epidermis dors lymph gland tracheal sys
Brain_and_ventral_nerve_cord_1	eEF1alpha1	CG8280	108075	217431	18054.1	7501.85	Set 1	1.26681	17.9129	ubiquitous	ubiquitous	ubiquitous	ubiquitous	ubiquitous	ubiquitous
Brain_and_ventral_nerve_cord_1	polo	CG12306	2045	2195	345.965	77.2558	Set 1	2.14436	18.0954	NA	NA	NA	NA	NA	NA
Brain_and_ventral_nerve_cord_1	CycB	CG3510	5546	7454	919.136	261.72	Set 1	1.80675	17.7888	cat_term:global_finito maternal	cellular blastoderm list_4-6:specific ubiquitous	list_7-8:specific ubiquitous	dors ectoderm PR procephalic ectoderm PR ubiquitous vent ectoderm PR	brain PR dors epidermis PR tracheal PR	brain cat_term:any_neural cat_term:subset_CNS central brain mushroom body central nervous sys lymph gland vent nerve cord
Brain_and_ventral_nerve_cord_1	Fib	CG9888	6865	9907	1156.69	354.011	Set 1	1.70407	17.3424	flag_for_volker maternal	ubiquitous	ubiquitous	trunk mesoderm PR ubiquitous	ant midgut PR dors pharyngeal muscle PR post midgut PR tracheal PR ubiquitous visceral muscle PR	dors prothoracic pharyngeal muscle faint ubiquitous gonad midgut tracheal sys visceral muscle
Brain_and_ventral_nerve_cord_1	Oatp58Dc	CG3380	1839	2037	297.573	67.6971	Set 1	2.11492	17.3888	cat_term:global_finito no staining	list_4-6:no staining no staining yolk nuclei	list_7-8:specific no staining yolk nuclei	yolk nuclei	yolk nuclei	amnioserosa yolk nuclei
Brain_and_ventral_nerve_cord_1	CG8289	CG8289	2923	3430	491.002	124.285	Set 1	1.97051	17.6214	(localised) cat_term:global_finito maternal	AISN ant endoderm AISN foregut AISN list_4-6:specific subset	ant endoderm A foregut A list_7-8:specific procephalic ectoderm A	ant endoderm PR head mesoderm PR post endoderm PR trunk mesoderm PR	ant midgut PR brain PR muscle sys PR plasmatocytes A post midgut PR somatic muscle PR trunk mesoderm PR visceral muscle PR	midgut muscle sys plasmatocytes
Brain_and_ventral_nerve_cord_1	Incenp	CG12165	1726	1690	279.517	64.1216	Set 1	2.10173	17.0911	maternal no staining	no staining ubiquitous	no staining ubiquitous	no staining ubiquitous	brain PR no staining ubiquitous vent nerve cord PR	brain no staining vent nerve cord
Brain_and_ventral_nerve_cord_1	sti	CG10522	2129	2342	350.92	79.8558	Set 1	2.11772	17.914	cat_term:finito1-3 cat_term:global_finito maternal	cat_term:finito4-6 cellular blastoderm list_4-6:ubiquitous ubiquitous	cat_term:finito7-8 faint ubiquitous	cat_term:finito9-10 faint ubiquitous procephalic ectoderm PR vent nerve cord PR P3	brain PR cat_term:finito11-12 faint ubiquitous neuroblasts of vent nervous sys procephalic neuroblasts vent nerve cord PR	brain cat_term:any_neural cat_term:common_C cat_term:finito13-16 neuroblasts of central brain neuroblasts of vent nervous sys sensory sys head vent nerve cord
Brain_and_ventral_nerve_cord_1	Mcm7	CG4978	2063	2200	337.539	82.1183	Set 1	2.02182	16.9897	cat_term:global_finito maternal	list_4-6:ubiquitous ubiquitous	list_7-8:ubiquitous ubiquitous	ubiquitous	brain PR sensory nervous sys SA ubiquitous vent nerve cord PR	brain central nervous sys dors epidermis lateral cord glia lateral cord neuron midgut sensory nervous sys PR vent epidermis vent nerve cord
Brain_and_ventral_nerve_cord_1	dap	CG1772	4089	5038	656.374	188.994	Set 1	1.78857	16.742	cat_term:global_finito maternal	amnioserosa AISN ant endoderm AISN endoderm AISN list_4-6:specific pole cell pole plasm	amnioserosa A vent ectoderm PR	amnioserosa PR vent ectoderm PR	amnioserosa ant midgut PR dors epidermis PR post midgut PR tracheal PR vent epidermis PR	brain dors/lateral sensory complexes midgut sensory sys head vent nerve cord vent sensory complex PR
Brain_and_ventral_nerve_cord_1	borr	CG4454	1905	1869	304.281	69.6836	Set 1	2.10596	17.3826	cat_term:global_finito maternal	cellular blastoderm list_4-6:ubiquitous ubiquitous	list_7-8:ubiquitous ubiquitous	procephalic ectoderm PR ubiquitous vent nerve cord PR P3	brain PR faint ubiquitous procephalic neuroblasts vent nerve cord PR	brain cat_term:any_neural cat_term:common_C central nervous sys vent nerve cord
Brain_and_ventral_nerve_cord_1	Df31	CG2207	15036	24907	2370.09	845.481	Set 1	1.48539	16.6532	maternal	maternal	list_7-8:ubiquitous	NA	brain PR ubiquitous vent nerve cord PR	brain cat_term:global_finito central nervous sys sensory nervous sys PR ubiquitous vent nerve cord
Brain_and_ventral_nerve_cord_1	tum	CG13345	1397	1597	236.622	56.1008	Set 1	2.051	16.1876	NA	NA	NA	NA	NA	NA
Brain_and_ventral_nerve_cord_1	fzy	CG4274	1345	1183	212.504	44.7562	Set 1	2.21545	17.1434	cat_term:global_finito maternal	cellular blastoderm list_4-6:ubiquitous ubiquitous	list_7-8:ubiquitous procephalic ectoderm A ubiquitous vent ectoderm PR	procephalic ectoderm PR ubiquitous vent nerve cord PR P3	brain PR central brain neuron central brain surface glia lateral cord surface glia neuroblasts of vent nervous sys procephalic neuroblasts ubiquitous vent nerve cord PR	brain cat_term:any_neural cat_term:common_C central brain surface glia central nervous sys lateral cord surface glia vent nerve cord
Brain_and_ventral_nerve_cord_1	Ocho	CG3396	976	733	151.858	29.199	Set 1	2.33014	16.9076	cat_term:finito1-3 cat_term:global_finito no staining	cat_term:finito4-6 list_4-6:specific mesectoderm AISN procephalic ectoderm AISN ubiquitous vent ectoderm AISN	cat_term:finito7-8 dors ectoderm PR list_7-8:specific procephalic ectoderm A vent ectoderm PR	cat_term:finito9-10 clypeolabrum PR dors ectoderm PR foregut PR procephalic ectoderm PR vent ectoderm PR vent nerve cord PR P3	atrium PR cat_term:finito11-12 clypeo-labral PR dors epidermis PR foregut PR head epidermis PR P1 optic lobe PR stomatogastric nervous sys PR vent epidermis PR	cat_term:finito13-16 dors epidermis head epidermis stomatogastric nervous sys
Brain_and_ventral_nerve_cord_PR	septin5	CG2916	NA	NA	NA	NA	NA	NA	NA	cat_term:global_finito	AISN ant endoderm AISN dors ectoderm AISN endoderm AISN foregut AISN head mesoderm AISN list_4-6:specific mesoderm AISN post endoderm AISN subset trunk mesoderm AISN ubiquitous vent ectoderm AISN	ant endoderm A foregut A head mesoderm PR list_7-8:specific post endoderm PR trunk mesoderm PR ubiquitous	ant endoderm PR foregut PR head mesoderm PR inclusive hindgut PR post endoderm PR trunk mesoderm PR ubiquitous	no staining	no staining
Brain_and_ventral_nerve_cord_PR	kuk	CG5175	4107	4858	1578.24	169.785	Set 1	3.20806	34.0857	cat_term:global_finito maternal	cellular blastoderm list_4-6:ubiquitous strong ubiquitous ubiquitous	ant endoderm A head mesoderm PR list_7-8:ubiquitous procephalic ectoderm A strong ubiquitous trunk mesoderm PR ubiquitous vent ectoderm PR	procephalic ectoderm PR strong ubiquitous trunk mesoderm PR ubiquitous vent nerve cord PR P3	brain PR central brain glia central brain neuron dors epidermis PR lateral cord glia lateral cord neuron neuroblasts of vent nervous sys procephalic neuroblasts sensory nervous sys SA strong ubiquitous tracheal PR ubiquitous vent nerve cord PR	brain cat_term:any_neural central nervous sys gonad sensory nervous sys PR vent nerve cord
Brain_and_ventral_nerve_cord_PR	CG10035	CG10035	1898	1443	738.693	56.259	Set 1	3.6894	35.1629	cat_term:global_finito ubiquitous	ubiquitous	ubiquitous	ubiquitous	ubiquitous	ubiquitous
Brain_and_ventral_nerve_cord_PR	Sr-CII	CG8856	824	519	328.076	22.2909	Set 1	3.81619	31.912	cat_term:finito1-3 no staining	cat_term:finito4-6 list_4-6:specific ubiquitous	cat_term:finito7-8 ubiquitous	cat_term:finito9-10 ubiquitous	brain PR cat_term:global_finito faint ubiquitous vent nerve cord PR	cat_term:global_finito no staining
Brain_and_ventral_nerve_cord_PR	slam	CG9506	424	223	164.036	7.73403	Set 1	4.23122	31.1699	maternal	dors ectoderm AISN procephalic ectoderm AISN segmentally repeated strong ubiquitous	no staining	no staining	no staining	no staining
Brain_and_ventral_nerve_cord_PR	Top2	CG10223	3341	4282	1271.67	145.274	Set 1	3.11998	32.1783	NA	NA	NA	NA	NA	NA
Brain_and_ventral_nerve_cord_PR	CG15628	CG15628	1443	1180	531.782	44.6484	Set 1	3.5422	32.0831	maternal	ant endoderm AISN cellular blastoderm head mesoderm AISN list_4-6:specific mesoderm AISN subset trunk mesoderm AISN	NA	ant endoderm PR head mesoderm PR main segment of Malpighian tubule SA Malpighian tubule A post endoderm PR	ant midgut PR foregut PR Malpighian tubule PR post midgut PR salivary gland body PR	NA
Brain_and_ventral_nerve_cord_PR	dan	CG11849	859	601	329.644	24.5463	Set 1	3.68972	30.8798	cat_term:global_finito	AISN cellular blastoderm dors ectoderm AISN ectoderm AISN list_4-6:specific procephalic ectoderm AISN subset ubiquitous vent ectoderm AISN visual AISN	dors ectoderm PR head epidermis lateral A list_7-8:specific procephalic ectoderm A ubiquitous vent ectoderm PR vent nerve cord A visual A	central brain PR P3 procephalic ectoderm PR vent ectoderm PR vent nerve cord PR P3	brain PR ganglion mother cell glioblasts of vent nervous sys gnathal PR neuroblasts of vent nervous sys procephalic neuroblasts vent epidermis PR vent nerve cord PR	brain cat_term:any_neural cat_term:subset_CNS central brain glia central brain neuron central nervous sys vent midline vent nerve cord
Brain_and_ventral_nerve_cord_PR	Df31	CG2207	11693	25151	4464.12	821.295	Set 1	2.44065	29.5916	maternal	maternal	list_7-8:ubiquitous	NA	brain PR ubiquitous vent nerve cord PR	brain cat_term:global_finito central nervous sys sensory nervous sys PR ubiquitous vent nerve cord
Brain_and_ventral_nerve_cord_PR	CycB3	CG5814	2760	3788	1068.84	125.892	Set 1	3.07438	30.9381	cat_term:global_finito maternal	cellular blastoderm list_4-6:ubiquitous ubiquitous vent ectoderm AISN	list_7-8:ubiquitous procephalic ectoderm A ubiquitous vent ectoderm PR vent nerve cord A visual A	procephalic ectoderm PR ubiquitous vent ectoderm PR visual PR	brain PR dors/lateral sensory complexes PR gnathal PR ubiquitous vent epidermis PR vent nerve cord PR vent sensory complex SA	brain cat_term:any_neural cat_term:common_C central brain glia central brain neuron central brain surface glia central nervous sys lateral cord glia lateral cord neuron lateral cord surface glia vent nerve cord
Brain_and_ventral_nerve_cord_PR	borr	CG4454	1551	1991	610.908	65.2735	Set 1	3.20445	29.6641	cat_term:global_finito maternal	cellular blastoderm list_4-6:ubiquitous ubiquitous	list_7-8:ubiquitous ubiquitous	procephalic ectoderm PR ubiquitous vent nerve cord PR P3	brain PR faint ubiquitous procephalic neuroblasts vent nerve cord PR	brain cat_term:any_neural cat_term:common_C central nervous sys vent nerve cord
Brain_and_ventral_nerve_cord_PR	betaTub56D	CG9277	13960	33087	5395.52	1108.19	Set 1	2.28226	28.295	cat_term:finito1-3 maternal	cat_term:finito4-6 list_4-6:ubiquitous maternal strong ubiquitous ubiquitous	cat_term:finito7-8 list_7-8:specific strong ubiquitous ubiquitous	cat_term:finito9-10 strong ubiquitous ubiquitous	atrium PR brain PR cat_term:global_finito dors epidermis PR head epidermis PR P1 strong ubiquitous vent epidermis PR vent nerve cord PR	atrium cat_term:global_finito dors epidermis head epidermis strong ubiquitous vent epidermis
Brain_and_ventral_nerve_cord_PR	Bsg25A	CG12205	101	14	42.8864	0.49862	Set 1	4.83881	26.3991	cat_term:global_finito maternal ubiquitous	AISN ectoderm AISN list_4-6:specific procephalic ectoderm AISN ubiquitous	no staining	no staining	no staining	no staining
Brain_and_ventral_nerve_cord_PR	Mcm7	CG4978	1528	2227	594.059	77.9792	Set 1	2.91106	26.8309	cat_term:global_finito maternal	list_4-6:ubiquitous ubiquitous	list_7-8:ubiquitous ubiquitous	ubiquitous	brain PR sensory nervous sys SA ubiquitous vent nerve cord PR	brain central nervous sys dors epidermis lateral cord glia lateral cord neuron midgut sensory nervous sys PR vent epidermis vent nerve cord
Brain_and_ventral_nerve_cord_PR	CG13096	CG13096	1473	2136	567.889	70.2715	Set 1	2.99421	27.403	maternal	strong ubiquitous	strong ubiquitous	strong ubiquitous	anal pad SA somatic muscle PR strong ubiquitous visceral muscle PR	anal pad brain dors prothoracic pharyngeal muscle somatic muscle ubiquitous visceral muscle
Brain_and_ventral_nerve_cord_PR	Mapmodulin	CG5784	3214	5828	1211.82	204.239	Set 1	2.5618	26.2434	maternal strong ubiquitous	strong ubiquitous	strong ubiquitous	strong ubiquitous	brain PR strong ubiquitous vent nerve cord PR	brain faint ubiquitous gonad vent nerve cord
Brain_and_ventral_nerve_cord_PR	fzy	CG4274	921	1288	373.563	44.083	Set 1	3.0507	26.0806	cat_term:global_finito maternal	cellular blastoderm list_4-6:ubiquitous ubiquitous	list_7-8:ubiquitous procephalic ectoderm A ubiquitous vent ectoderm PR	procephalic ectoderm PR ubiquitous vent nerve cord PR P3	brain PR central brain neuron central brain surface glia lateral cord surface glia neuroblasts of vent nervous sys procephalic neuroblasts ubiquitous vent nerve cord PR	brain cat_term:any_neural cat_term:common_C central brain surface glia central nervous sys lateral cord surface glia vent nerve cord
Brain_and_ventral_nerve_cord_PR	polo	CG12306	1452	2221	559.553	77.0344	Set 1	2.84209	25.9503	NA	NA	NA	NA	NA	NA
Brain_and_ventral_nerve_cord_PR	wech	CG42396	12877	30972	4823.79	1128.2	Set 1	2.09486	25.6333	cat_term:global_finito maternal strong ubiquitous	cellular blastoderm list_4-6:specific maternal strong ubiquitous ubiquitous	central brain A dors ectoderm PR list_7-8:specific procephalic ectoderm A ubiquitous vent ectoderm PR	central brain PR P3 procephalic ectoderm PR vent nerve cord PR P3 visual PR	brain PR central brain glia central brain neuron lateral cord glia lateral cord neuron neuroblasts of vent nervous sys procephalic neuroblasts vent nerve cord PR	brain cat_term:any_neural cat_term:pan_CNS cat_term:PNS central brain glia central brain neuron central nervous sys sensory nervous sys PR vent nerve cord
Brain_and_ventral_nerve_cord_PR	Iswi	CG8625	1310	2174	516.522	76.5582	Set 1	2.73548	24.6617	maternal ubiquitous	list_4-6:ubiquitous ubiquitous	list_7-8:ubiquitous ubiquitous	procephalic ectoderm PR ubiquitous vent nerve cord PR P3 visual PR	ant midgut PR brain PR post midgut PR ubiquitous vent nerve cord PR	brain cat_term:any_neural cat_term:global_finito cat_term:pan_CNS central brain glia central brain neuron central nervous sys gonad lateral cord glia lateral cord neuron midgut vent nerve cord
Procephalic_ventral ectoderm_AISN	cas	CG2102	7473	4565	3535.7	198.507	Set 1	4.14748	48.8913	cat_term:global_finito flag_for_volker maternal no staining	cellular blastoderm faint ubiquitous gap list_4-6:specific mesectoderm AISN no staining subset vent ectoderm AISN	gap list_7-8:specific mesectoderm PR no staining vent ectoderm PR vent nerve cord A	mesectoderm PR no staining procephalic ectoderm PR vent nerve cord PR P3	brain PR central brain glia central brain neuron lateral cord glia lateral cord neuron midline PR no staining procephalic neuroblasts vent nerve cord PR	brain cat_term:any_neural cat_term:subset_CNS central brain central brain glia central brain neuron central nervous sys lateral cord glia lateral cord neuron no staining vent nerve cord
Procephalic_ventral ectoderm_AISN	jigr1	CG17383	4512	4111	2085.06	162.073	Set 1	3.6765	40.5391	maternal	ectoderm AISN faint ubiquitous list_4-6:specific ubiquitous	faint ubiquitous procephalic ectoderm A ubiquitous	faint ubiquitous procephalic ectoderm PR ubiquitous vent nerve cord PR P3	brain PR faint ubiquitous vent nerve cord PR	brain faint ubiquitous vent nerve cord
Procephalic_ventral ectoderm_AISN	klu	CG12296	12104	15179	5667.44	630.617	Set 1	3.16558	39.4707	no staining	list_4-6:no staining no staining	list_7-8:specific no staining	ant endoderm PR central brain PR P3 faint ubiquitous post endoderm PR vent nerve cord PR P3	ant midgut PR brain PR dors epidermis PR faint ubiquitous neuroblasts of central brain neuroblasts of vent nervous sys post midgut PR post spiracle SA vent nerve cord PR	brain cat_term:any_neural cat_term:global_finito cat_term:PNS cat_term:subset_CNS dors epidermis faint ubiquitous head epidermis neuroblasts of central brain neuroblasts of vent nervous sys post spiracle rectum sensory nervous sys PR vent epidermis vent nerve cord
Procephalic_ventral ectoderm_AISN	nab	CG33545	1180	686	594.353	26.8396	Set 1	4.41611	40.7059	NA	NA	NA	NA	NA	NA
Procephalic_ventral ectoderm_AISN	ktub	CG9398	1310	1078	590.622	40.6818	Set 1	3.82474	35.2203	cat_term:global_finito	endoderm AISN head mesoderm AISN list_4-6:specific mesoderm AISN trunk mesoderm A vent ectoderm AISN	ant endoderm A head mesoderm PR list_7-8:specific trunk mesoderm PR vent ectoderm PR vent nerve cord A	procephalic ectoderm PR vent nerve cord PR P3	brain PR dors/lateral sensory complexes PR vent nerve cord PR vent sensory complex SA	antennal sense organ cat_term:any_neural cat_term:pan_CNS cat_term:PNS central brain glia central brain neuron dors/lateral sensory complexes head epidermis lateral cord glia lateral cord neuron sensory sys head vent nerve cord vent sensory complex PR
Procephalic_ventral ectoderm_AISN	E2f1	CG6376	11734	19554	5334.28	762.917	Set 1	2.80381	34.7149	cat_term:global_finito maternal	AISN cellular blastoderm ectoderm AISN gap list_4-6:specific procephalic ectoderm AISN subset ubiquitous	dors ectoderm PR faint ubiquitous list_7-8:specific procephalic ectoderm A vent ectoderm PR vent nerve cord A	central brain PR P3 faint ubiquitous procephalic ectoderm PR vent nerve cord PR P3	ant midgut PR brain PR faint ubiquitous foregut PR hindgut proper PR neuroblasts of vent nervous sys post midgut PR procephalic neuroblasts vent nerve cord PR	brain cat_term:any_neural cat_term:pan_CNS central nervous sys faint ubiquitous foregut gastric caecum hindgut midgut midgut chamber vent nerve cord
Procephalic_ventral ectoderm_AISN	Pex7	CG6486	595	422	316.159	17.9925	Set 1	4.05715	33.7111	no staining	no staining	no staining	no staining	dors/lateral sensory complexes PR neuroblasts of central brain neuroblasts of vent nervous sys	dors/lateral sensory complexes neuroblasts of central brain neuroblasts of vent nervous sys
Procephalic_ventral ectoderm_AISN	Sp1	CG1343	2895	3879	1328.25	164.066	Set 1	3.00841	31.2164	cat_term:global_finito maternal no staining	faint ubiquitous no staining	no staining	central brain PR P3 gnathal lobes A no staining	atrium PR clypeo-labral PR head epidermis dors PR P1 no staining pars intercerebralis PR	atrium clypeolabrum head epidermis dors no staining vent midline
Procephalic_ventral ectoderm_AISN	pros	CG17228	3515	6151	1680.78	225.299	Set 1	2.89283	30.9989	cat_term:global_finito no staining	AISN cellular blastoderm ectoderm AISN list_4-6:specific procephalic ectoderm AISN subset ubiquitous vent ectoderm AISN	list_7-8:specific procephalic ectoderm A vent ectoderm PR	procephalic ectoderm PR vent nerve cord PR P3 visual PR	(larval eye PR) ant midgut PR brain PR central brain glia central brain neuron dors/lateral sensory complexes PR ganglion mother cell labial sensory complex PR labral sensory complex PR lateral cord glia lateral cord neuron maxillary sensory complex PR midline PR neuroblasts of vent nervous sys post midgut PR procephalic neuroblasts sensory nervous sys SA vent midline neuroblast vent nerve cord P…	adult midgut precursor Bolwig's organ brain cat_term:any_neural cat_term:PNS cat_term:subset_CNS central brain glia central brain surface glia central nervous sys dors/lateral sensory complexes foregut sensory structure garland cell labial sensory complex labral sensory complex lateral cord glia leading edge cell maxillary sensory complex sensory nervous sys PR sensory sys head vent midline vent …
Procephalic_ventral ectoderm_AISN	Tet	CG43444	20010	45348	9122.44	1792.57	Set 1	2.34659	30.8702	cat_term:global_finito	list_4-6:no staining no staining	hindgut A list_7-8:specific procephalic ectoderm A vent ectoderm PR	inclusive hindgut PR procephalic ectoderm PR vent nerve cord PR P3 visual PR	brain PR central brain glia central brain neuron faint ubiquitous hindgut proper PR lateral cord glia lateral cord neuron neuroblasts of vent nervous sys optic lobe PR procephalic neuroblasts proventriculus PR vent nerve cord PR	brain cat_term:any_neural cat_term:PNS central nervous sys lateral cord neuron sensory nervous sys PR vent nerve cord vent sensory complex PR
Procephalic_ventral ectoderm_AISN	CG9650	CG9650	8318	15405	3845.54	646.176	Set 1	2.57096	30.6184	cat_term:global_finito maternal no staining	faint ubiquitous no staining	no staining	no staining procephalic ectoderm PR	brain PR foregut PR muscle sys PR no staining vent nerve cord PR	brain dors/lateral sensory complexes no staining proventriculus sensory sys head vent nerve cord vent sensory complex PR
Procephalic_ventral ectoderm_AISN	CG17716	CG17716	4104	7354	1909.45	325.846	Set 1	2.54647	27.7558	NA	NA	NA	NA	NA	NA
Procephalic_ventral ectoderm_AISN	sca	CG17579	2905	4731	1263.22	196.114	Set 1	2.68	27.6148	no staining	no staining	no staining	no staining	no staining	no staining
Procephalic_ventral ectoderm_AISN	CG15646	CG15646	381	316	180.107	10.6303	Set 1	3.95289	29.6494	NA	NA	NA	NA	NA	NA
Procephalic_ventral ectoderm_AISN	CycE	CG3938	2994	5969	1335.27	216.966	Set 1	2.61496	27.1537	cat_term:global_finito maternal	dors ectoderm AISN hindgut AISN list_4-6:specific mesoderm AISN procephalic ectoderm AISN subset vent ectoderm AISN	ant endoderm A head mesoderm PR hindgut A list_7-8:specific mesectoderm PR procephalic ectoderm A trunk mesoderm PR vent ectoderm PR	dors ectoderm PR inclusive hindgut PR mesectoderm PR procephalic ectoderm PR trunk mesoderm PR vent nerve cord PR P3 visual PR	central brain glia central brain neuron central brain surface glia dors epidermis PR ganglion mother cell lateral cord glia lateral cord surface glia neuroblasts of vent nervous sys procephalic neuroblasts	cat_term:any_neural cat_term:pan_CNS central brain glia central brain neuron central brain surface glia lateral cord glia lateral cord neuron lateral cord surface glia vent midline vent nerve cord
Procephalic_ventral ectoderm_AISN	seq	CG32904	2884	5738	1318.55	220.689	Set 1	2.57235	26.6645	maternal no staining	AISN dors ectoderm AISN list_4-6:specific no staining procephalic ectoderm AISN vent ectoderm AISN	list_7-8:specific no staining procephalic ectoderm A vent ectoderm PR vent nerve cord A	central brain PR P3 dors epidermis A no staining procephalic ectoderm PR vent ectoderm PR vent epidermis PR vent nerve cord PR P3	antennal PR1 brain PR dors/lateral sensory complexes PR hypopharyngeal sense organ PR labial sensory complex PR labral sensory complex PR maxillary sensory complex PR no staining vent nerve cord PR vent sensory complex SA	brain cat_term:any_neural cat_term:global_finito cat_term:pan_CNS cat_term:PNS central nervous sys dors epidermis dors/lateral sensory complexes head epidermis no staining sensory sys head vent nerve cord vent sensory complex PR
Procephalic_ventral ectoderm_AISN	Kdm4B	CG33182	4208	8503	1943.71	362.248	Set 1	2.41979	26.437	maternal	AISN dors ectoderm AISN list_4-6:specific procephalic ectoderm AISN vent ectoderm AISN	list_7-8:specific procephalic ectoderm A vent ectoderm PR vent nerve cord A	procephalic ectoderm PR vent ectoderm PR vent nerve cord PR P3	antennal PR1 brain PR dors/lateral sensory complexes PR hypopharyngeal sense organ PR labial sensory complex PR labral sensory complex PR maxillary sensory complex PR vent nerve cord PR vent sensory complex SA	brain cat_term:any_neural cat_term:global_finito cat_term:pan_CNS cat_term:PNS central nervous sys dors epidermis head epidermis vent nerve cord
Procephalic_ventral ectoderm_AISN	msi	CG5099	6662	16194	3144.07	685.749	Set 1	2.19478	25.5009	NA	NA	NA	NA	NA	NA
Procephalic_ventral ectoderm_AISN	sktl	CG9985	2008	3751	939.705	151.745	Set 1	2.62108	25.89	cat_term:global_finito maternal	hypopharynx AISN list_4-6:specific procephalic ectoderm AISN ubiquitous	hypopharynx A list_7-8:specific procephalic ectoderm A ubiquitous	hindgut proper A procephalic ectoderm PR vent nerve cord PR P3	ant midgut PR brain PR hindgut proper PR post midgut PR vent nerve cord PR	brain cat_term:any_neural cat_term:pan_CNS midgut vent nerve cord
Procephalic_ventral ectoderm_AISN	toy	CG11186	829	1332	394.712	52.9161	Set 1	2.87201	24.7806	cat_term:global_finito no staining	AISN list_4-6:specific no staining procephalic ectoderm AISN subset visual AISN	list_7-8:specific procephalic ectoderm A visual A	no staining procephalic ectoderm PR visual PR	brain PR central brain lateral cord neuron lateral cord surface glia no staining optic lobe PR	amnioserosa brain cat_term:any_neural cat_term:subset_CNS central brain central nervous sys lateral cord lateral cord neuron optic lobe vent nerve cord
Cholinergic	nAChRalpha6	CG4128	9243	3344	2906.07	125.838	Set 1	4.518	51.9812	no staining	no staining	no staining	no staining	no staining	no staining
Cholinergic	Cngl	CG43395	4886	1967	1514.83	74.4017	Set 1	4.32841	45.7335	maternal	ubiquitous	NA	NA	NA	NA
Cholinergic	Rbp6	CG32169	16920	10803	5301.82	406.241	Set 1	3.70253	45.8098	cat_term:global_finito	list_4-6:no staining no staining	no staining	cat_term:finito9-10 no staining	no staining	brain central brain neuron central nervous sys corpus allatum dors prothoracic pharyngeal muscle lateral cord neuron ring gland vent nerve cord
Cholinergic	Nckx30C	CG18660	8043	3852	2501.52	147.947	Set 1	4.06993	45.9461	no staining	list_4-6:no staining no staining	list_7-8:no staining no staining	no staining	no staining	NA
Cholinergic	Syt1	CG3139	8580	4578	2698.32	183.855	Set 1	3.8676	44.0843	cat_term:global_finito	list_4-6:no staining no staining	list_7-8:no staining no staining	no staining	no staining	brain cat_term:global_finito central nervous sys vent nerve cord
Cholinergic	Rdl	CG10537	6096	3206	1902.36	117.097	Set 1	4.00974	43.6834	NA	NA	NA	NA	NA	NA
Cholinergic	cac	CG43368	14285	8599	4521.47	366.923	Set 1	3.61932	43.949	cat_term:global_finito	no staining	no staining	no staining	no staining	brain central brain glia central nervous sys lateral cord glia vent nerve cord
Cholinergic	GluClalpha	CG7535	3692	1548	1146.96	62.7448	Set 1	4.16937	42.3811	no staining	no staining	no staining	no staining	no staining	brain vent nerve cord
Cholinergic	mmd	CG42252	4881	2399	1543.01	90.5659	Set 1	4.07479	43.1621	no staining	list_4-6:specific no staining	list_7-8:no staining no staining	no staining	no staining	brain cat_term:global_finito head epidermis dors vent nerve cord
Cholinergic	rad	CG44424	3166	1351	997.141	52.8324	Set 1	4.21125	41.9571	NA	NA	NA	NA	NA	NA
Cholinergic	nAChRalpha1	CG5610	3767	1909	1195.51	71.9395	Set 1	4.03478	41.254	NA	NA	NA	NA	NA	NA
Cholinergic	side-II	CG42313	2004	639	622.08	26.1362	Set 1	4.51881	41.9494	NA	NA	NA	NA	NA	NA
Cholinergic	br	CG11491	9303	6278	3006.91	247.452	Set 1	3.59725	41.5646	cat_term:global_finito no staining	list_4-6:no staining no staining	list_7-8:no staining no staining	no staining	brain PR no staining vent nerve cord PR	brain central nervous sys cuprophilic cell midgut midgut interstitial cell no staining vent nerve cord
Cholinergic	Dscam2	CG42256	1369	475	425.509	18.0226	Set 1	4.4834	39.169	cat_term:global_finito no staining	no staining	no staining	no staining	no staining	no staining
Cholinergic	Dop2R	CG33517	3151	1255	975.06	49.6504	Set 1	4.26684	42.3733	maternal	maternal	no staining	no staining	no staining	brain cat_term:global_finito no staining vent nerve cord
Cholinergic	CG45002	CG45002	2626	1197	828.211	44.2224	Set 1	4.19489	40.6719	cat_term:global_finito no staining	no staining	no staining	no staining	no staining	no staining
Cholinergic	side-III	CG34113	2191	917	659.442	36.5799	Set 1	4.13321	38.717	cat_term:global_finito no staining	no staining	no staining	no staining	no staining	no staining
Cholinergic	nAChRalpha5	CG32975	3219	1531	1002.01	60.4762	Set 1	4.02672	40.1469	NA	NA	NA	NA	NA	NA
Cholinergic	dpr8	CG32600	3919	2153	1243.56	88.5831	Set 1	3.7951	39.019	NA	NA	NA	NA	NA	NA
Chordotonal_organ	CG7409	CG7409	600	24	4121.23	0.473961	Set 1	11.4492	137.495	cat_term:global_finito no staining	no staining	no staining	no staining	no staining	no staining
Chordotonal_organ	CG13133	CG13133	405	14	2679.09	0.182986	Set 1	11.1451	126.921	NA	NA	NA	NA	NA	NA
Chordotonal_organ	CG43149	CG43149	527	40	3407.62	1.17783	Set 1	10.6117	124.527	NA	NA	NA	NA	NA	NA
Chordotonal_organ	alphaTub85E	CG9476	3378	2390	21520.7	82.5318	Set 1	8.00918	115.28	flag_for_volker maternal	ubiquitous	ubiquitous	ubiquitous	ubiquitous	faint ubiquitous somatic muscle
Chordotonal_organ	CG14445	CG14445	475	57	2904.15	2.02418	Set 1	9.90736	113.978	no staining	no staining	no staining	no staining	no staining	no staining
Chordotonal_organ	CG31345	CG31345	206	71	1272.53	2.43833	Set 1	8.53178	88.002	no staining	no staining	no staining	no staining	no staining	no staining
Chordotonal_organ	sosie	CG13636	162	144	1025.09	4.65989	Set 1	7.50075	75.0296	cat_term:global_finito	list_4-6:no staining no staining	no staining	no staining	no staining	sensory nervous sys PR sensory sys head vent sensory complex PR
Chordotonal_organ	CG10062	CG10062	83	43	656.302	1.70269	Set 1	7.92382	74.1702	cat_term:global_finito no staining	no staining	no staining	no staining	no staining	no staining
Chordotonal_organ	Tektin-C	CG10541	205	145	1140.83	6.36099	Set 1	7.27597	73.9029	NA	list_4-6:no staining no staining	list_7-8:no staining no staining	cat_term:finito9-10 no staining	no staining	cat_term:global_finito dors/lateral sensory complexes sensory nervous sys PR sensory sys head vent sensory complex PR
Chordotonal_organ	CAP	CG18408	1004	5127	8642.45	201.787	Set 1	5.4134	70.7931	cat_term:global_finito flag_for_volker maternal no staining	list_4-6:no staining maternal no staining	list_7-8:no staining no staining ubiquitous	no staining ubiquitous	garland cell PR no staining ubiquitous	amnioserosa dors vessel dors/lateral sensory complexes garland cell head epidermis no staining sensory nervous sys PR ubiquitous vent sensory complex PR visceral muscle
Chordotonal_organ	CG6055	CG6055	234	549	1918.78	21.7609	Set 1	6.39749	69.7757	cat_term:global_finito	list_4-6:no staining no staining	list_7-8:no staining no staining	cat_term:finito9-10 no staining	hindgut proper PR	dors epidermis dors trunk dors/lateral sensory complexes esophagus foregut head epidermis hindgut post spiracle salivary gland salivary gland body salivary gland common duct salivary gland duct tracheal sys
Chordotonal_organ	Adgf-C	CG9345	27	11	333.393	0.267315	Set 1	8.03931	67.4128	NA	NA	NA	NA	NA	NA
Chordotonal_organ	epsilonTry	CG18681	41	382	925.845	11.4392	Set 1	6.2178	61.2838	NA	NA	NA	NA	NA	NA
Chordotonal_organ	Root	CG6129	230	454	1345.03	17.6216	Set 1	6.17451	64.1809	NA	NA	NA	NA	NA	NA
Chordotonal_organ	bdl	CG16857	75	145	706.448	6.2073	Set 1	6.61498	62.6206	cat_term:global_finito	list_4-6:no staining no staining	no staining	no staining	no staining	dors epidermis dors/lateral sensory complexes
Chordotonal_organ	betaTry	CG18211	23	192	502.626	5.55942	Set 1	6.25977	56.189	no staining	no staining	no staining	no staining	no staining	no staining
Chordotonal_organ	CG8086	CG8086	238	785	1837.7	32.5333	Set 1	5.77616	62.6394	no staining	no staining	no staining	no staining	no staining	NA
Chordotonal_organ	tau	CG45110	362	1913	2688.48	85.3929	Set 1	4.95974	56.5068	cat_term:global_finito no staining	no staining	no staining	no staining	no staining	no staining
Chordotonal_organ	CG15203	CG15203	61	97	381.198	3.75687	Set 1	6.32438	54.2516	NA	list_4-6:no staining no staining	no staining	no staining	no staining	cat_term:global_finito dors epidermis vent epidermis
Chordotonal_organ	Naam	CG31216	105	309	784.293	13.5727	Set 1	5.75005	55.2988	cat_term:global_finito maternal	list_4-6:ubiquitous no staining	list_7-8:no staining no staining	no staining	no staining	dors/lateral sensory complexes sensory nervous sys PR sensory sys head vent sensory complex PR
Chordotonal_sensory	CG31036	CG31036	353	238	1283.96	8.85169	Set 1	7.02601	72.5612	cat_term:global_finito	list_4-6:no staining no staining	list_7-8:no staining no staining	cat_term:finito9-10 no staining	no staining	adult hindgut precursor antennal sense organ epipharynx esophagus foregut sensory structure hypopharynx labial sensory complex labral sensory complex maxillary sensory complex optic lobe post spiracle proventriculus proventriculus inner layer sensory nervous sys PR sensory sys head small intestine vent sensory complex PR
Chordotonal_sensory	nompC	CG11020	233	124	833.091	4.39824	Set 1	7.26984	70.547	NA	NA	NA	NA	NA	NA
Chordotonal_sensory	CG43338	CG43338	171	88	618.113	2.89409	Set 1	7.31044	67.7974	NA	NA	NA	NA	NA	NA
Chordotonal_sensory	CG9492	CG9492	111	61	408.161	2.55037	Set 1	6.84502	59.391	no staining	no staining	no staining	no staining	no staining	no staining
Chordotonal_sensory	Tektin-C	CG10541	188	167	632.208	5.38354	Set 1	6.6299	61.7014	NA	list_4-6:no staining no staining	list_7-8:no staining no staining	cat_term:finito9-10 no staining	no staining	cat_term:global_finito dors/lateral sensory complexes sensory nervous sys PR sensory sys head vent sensory complex PR
Chordotonal_sensory	Crg-1	CG32788	80	33	299.53	1.66218	Set 1	6.81395	56.0881	no staining	no staining	no staining	no staining	no staining	brain vent nerve cord
Chordotonal_sensory	CG14342	CG14342	80	42	265.909	1.10014	Set 1	6.9843	56.2949	NA	NA	NA	NA	NA	NA
Chordotonal_sensory	Erk7	CG32703	69	44	270.384	1.51291	Set 1	6.74951	54.5643	cat_term:global_finito no staining	no staining	no staining	no staining	no staining	no staining
Chordotonal_sensory	CG45105	CG45105	296	519	1043.63	18.022	Set 1	5.7778	57.9442	cat_term:global_finito maternal no staining	faint ubiquitous list_4-6:ubiquitous no staining	faint ubiquitous list_7-8:ubiquitous no staining	faint ubiquitous no staining	antennal PR1 dors/lateral sensory complexes PR sensory nervous sys SA vent sensory complex SA	dors/lateral sensory complexes sensory nervous sys PR sensory sys head vent sensory complex PR
Chordotonal_sensory	CG14692	CG14692	159	174	551.059	6.94238	Set 1	6.11649	55.7131	NA	NA	NA	NA	NA	NA
Chordotonal_sensory	CG7236	CG7236	102	109	366.286	4.57694	Set 1	6.03735	51.4428	cat_term:global_finito no staining	no staining	no staining	no staining	no staining	no staining
Chordotonal_sensory	eys	CG33955	516	1114	1853.13	50.0236	Set 1	5.18265	56.2656	NA	list_4-6:no staining	NA	NA	NA	cat_term:global_finito sensory sys head
Chordotonal_sensory	pHCl-1	CG44099	474	1224	1671.5	51.1356	Set 1	5.00273	53.5682	NA	NA	NA	NA	NA	NA
Chordotonal_sensory	Dhc98D	CG1842	59	17	212.142	0.591925	Set 1	7.05811	54.5992	NA	NA	NA	NA	NA	NA
Chordotonal_sensory	CG17564	CG17564	85	61	312.681	2.03596	Set 1	6.6864	55.4513	no staining	no staining	no staining	no staining	dors/lateral sensory complexes PR	dors/lateral sensory complexes labial sensory complex labral sensory complex maxillary sensory complex
Chordotonal_sensory	dtr	CG31623	60	37	214.209	1.61384	Set 1	6.3567	49.2618	NA	NA	NA	NA	NA	NA
Chordotonal_sensory	fd3F	CG44123	87	82	320.885	3.43613	Set 1	6.17661	51.4537	maternal	faint ubiquitous	faint ubiquitous	faint ubiquitous	faint ubiquitous	faint ubiquitous
Chordotonal_sensory	CG31869	CG31869	420	951	1523.64	42.9873	Set 1	5.11429	54.0798	cat_term:global_finito no staining	no staining	no staining	no staining	no staining	no staining
Chordotonal_sensory	Dhc93AB	CG3723	124	180	470.581	8.68613	Set 1	5.60238	49.7567	NA	NA	NA	NA	NA	NA
Chordotonal_sensory	CG15373	CG15373	43	8	155.783	0.276285	Set 1	6.93144	50.5484	NA	NA	NA	NA	NA	NA
Copper_cells_1	Ptx1	CG1447	5574	2098	3251.05	87.9036	Set 1	5.19252	60.5818	cat_term:global_finito maternal	cellular blastoderm endoderm AISN list_4-6:specific post endoderm AISN subset	list_7-8:no staining post endoderm PR	post endoderm PR vent nerve cord PR P3	brain PR central brain glia cuprophilic cells PR ganglion mother cell Malpighian tubule main body PR Malpighian tubule PR neuroblasts of vent nervous sys post midgut PR somatic muscle PR vent nerve cord PR	brain cat_term:any_neural cat_term:subset_CNS central brain glia central brain neuron central nervous sys cuprophilic cell hindgut lateral cord glia lateral cord neuron Malpighian tubule Malpighian tubule tip cell midgut midgut chamber somatic muscle vent nerve cord
Copper_cells_1	HHEX	CG7056	1219	275	745.627	12.0227	Set 1	5.83935	55.7322	maternal	ubiquitous	no staining	no staining	post midgut PR	cuprophilic cell midgut chamber
Copper_cells_1	5-HT7	CG12073	2400	1139	1322.29	54.91	Set 1	4.56379	47.3262	no staining	no staining	no staining	no staining	no staining	cat_term:global_finito cuprophilic cell midgut interstitial cell
Copper_cells_1	lab	CG1264	3488	2174	1980.5	101.008	Set 1	4.27912	46.8665	cat_term:global_finito flag_for_volker maternal	cellular blastoderm faint ubiquitous hypopharynx AISN list_4-6:specific post endoderm AISN subset	ant endoderm A dors ectoderm PR foregut A hypopharynx A list_7-8:specific post endoderm PR	ant endoderm PR central brain PR P3 dors ridge A foregut PR hypopharynx PR post endoderm PR	ant midgut PR brain PR dors ridge PR P1 hypopharynx PR P1 post midgut PR	brain cuprophilic cell hypopharynx midgut midgut chamber midgut interstitial cell
Copper_cells_1	CG34347	CG34347	8254	8933	4802.12	420.819	Set 1	3.50897	42.9139	NA	NA	NA	NA	NA	NA
Copper_cells_1	dve	CG5799	3039	3214	1750.93	136.843	Set 1	3.66703	39.5112	cat_term:global_finito maternal	dors ectoderm A faint ubiquitous list_4-6:no staining no staining	ant endoderm A foregut A list_7-8:no staining no staining procephalic ectoderm A	ant endoderm PR foregut PR no staining procephalic ectoderm PR vent ectoderm PR	ant midgut PR brain PR dors/lateral sensory complexes PR no staining post midgut PR proventriculus PR vent epidermis PR vent nerve cord PR	brain dors/lateral sensory complexes midgut chamber proventriculus sensory sys head vent nerve cord vent sensory complex PR
Copper_cells_1	fa2h	CG30502	1081	915	640.194	37.589	Set 1	4.05225	37.7856	NA	NA	NA	NA	NA	NA
Copper_cells_1	kcc	CG5594	2437	2447	1284.16	106.103	Set 1	3.58375	37.012	cat_term:global_finito maternal	apically cleared cellular blastoderm list_4-6:ubiquitous maternal	no staining	cat_term:finito9-10 no staining	head mesoderm PR	anal pad dors prothoracic pharyngeal muscle lateral cord surface glia midgut midgut chamber muscle sys post spiracle proventriculus somatic muscle vent nerve cord yolk nuclei
Copper_cells_1	CG31007	CG31007	280	110	143.808	5.23757	Set 1	4.52702	32.495	NA	NA	NA	NA	NA	NA
Copper_cells_1	rgr	CG8643	1089	1020	605.498	42.5938	Set 1	3.79593	35.0909	maternal no staining	no staining trunk mesoderm A trunk mesoderm AISN	head mesoderm PR no staining trunk mesoderm PR	head mesoderm PR no staining trunk mesoderm PR	anal pad SA dors pharyngeal muscle PR no staining somatic muscle PR visceral muscle PR	anal pad dors prothoracic pharyngeal muscle midgut interstitial cell no staining somatic muscle visceral muscle
Copper_cells_1	CG12974	CG12974	476	380	275.517	15.9994	Set 1	4.01858	32.5956	no staining	no staining	no staining yolk nuclei	no staining yolk nuclei	no staining	no staining
Copper_cells_1	CG31751	CG31751	854	864	468.114	33.9141	Set 1	3.74498	33.2322	NA	NA	NA	NA	NA	NA
Copper_cells_1	Itgbn	CG1762	827	793	485.851	37.9472	Set 1	3.64092	32.5037	cat_term:global_finito	list_4-6:no staining no staining	no staining	no staining	no staining	midgut
Copper_cells_1	trol	CG33950	18278	42278	10467.7	2007.92	Set 1	2.38144	31.8013	cat_term:global_finito no staining	list_4-6:no staining no staining	list_7-8:no staining no staining	no staining	germ cell no staining	circulatory sys dors epidermis dors vessel epipharynx foregut sensory structure hypopharynx lateral cord lateral cord glia lymph gland midgut muscle sys no staining proventriculus proventriculus inner layer proventriculus intermediate layer proventriculus outer layer ring gland somatic muscle vent midline vent nerve cord
Copper_cells_1	Gmap	CG33206	6308	12825	3732.23	604.966	Set 1	2.62273	31.1218	maternal ubiquitous	faint ubiquitous post	ant endoderm A post endoderm PR	ant endoderm PR post endoderm PR	anal pad SA ant midgut PR post midgut PR salivary gland PR	anal pad lymph gland midgut salivary gland
Copper_cells_1	bwa	CG13969	1450	2147	869.671	96.1863	Set 1	3.16165	30.8766	cat_term:global_finito maternal	AISN cellular blastoderm ectoderm AISN gap list_4-6:specific procephalic ectoderm AISN subset vent ectoderm AISN	NA	amnioserosa procephalic ectoderm PR vent ectoderm PR visual PR yolk nuclei	amnioserosa ant midgut PR brain PR longitudinal visceral mesoderm PR neuroblasts of vent nervous sys post midgut PR procephalic neuroblasts trunk mesoderm PR	cuprophilic cell dors vessel fat body longitudinal visceral muscle fibers midgut midgut chamber plasmatocytes
Copper_cells_1	ush	CG2762	3444	6793	1990.81	304.16	Set 1	2.70572	29.6543	cat_term:global_finito	amnioserosa AISN cellular blastoderm dors ectoderm AISN list_4-6:specific subset yolk nuclei	amnioserosa A dors ectoderm PR head mesoderm PR list_7-8:specific procephalic ectoderm A yolk nuclei	amnioserosa PR dors ectoderm PR head mesoderm PR	amnioserosa antennal PR1 dors epidermis PR head mesoderm PR	brain cat_term:any_neural cat_term:subset_CNS dors epidermis garland cell head epidermis midgut sensory nervous sys PR sensory sys head vent midline vent nerve cord
Copper_cells_1	mesh	CG31004	2797	5824	1561.57	240.138	Set 1	2.69507	28.5939	no staining	list_4-6:no staining no staining	no staining	cat_term:finito9-10 no staining	no staining	cat_term:global_finito hindgut Malpighian tubule midgut proventriculus
Copper_cells_1	MESR3	CG15162	1984	3725	1105.65	166.212	Set 1	2.72515	27.5567	cat_term:global_finito flag_for_volker maternal	AISN ant endoderm AISN cellular blastoderm dors ectoderm AISN endoderm AISN head mesoderm A head mesoderm AISN hindgut AISN list_4-6:specific post endoderm AISN procephalic ectoderm AISN subset vent ectoderm AISN	ant endoderm A dors ectoderm PR faint ubiquitous head mesoderm PR list_7-8:specific post endoderm PR procephalic ectoderm A vent ectoderm PR	ant endoderm PR crystal cell SA dors ectoderm PR faint ubiquitous garland cell PR head mesoderm PR post endoderm PR procephalic ectoderm PR yolk nuclei	ant midgut PR dors epidermis PR faint ubiquitous garland cell PR Malpighian tubule PR post midgut PR procephalic neuroblasts procrystal cell proventriculus PR salivary gland body PR trunk mesoderm PR visceral muscle PR yolk nuclei	crystal cell faint ubiquitous Malpighian tubule midgut midgut interstitial cell post spiracle tracheal sys visceral muscle
Copper_cells_1	slo	CG10693	4186	7456	2058.05	349.609	Set 1	2.55335	28.1066	cat_term:global_finito no staining	no staining	no staining	no staining	no staining	no staining
Crystal_cell	Pde1c	CG44007	6587	4496	42193.3	197.956	Set 1	7.72842	118.745	NA	list_4-6:no staining	NA	NA	procrystal cell	cat_term:global_finito crystal cell lymph gland vent midline
Crystal_cell	lz	CG1689	406	112	2632.17	4.06308	Set 1	9.02202	102.513	no staining	no staining	no staining	crystal cell SA	atrium PR procrystal cell	atrium crystal cell
Crystal_cell	PPO2	CG8193	1070	2404	6918.28	82.3421	Set 1	6.37522	81.3249	cat_term:global_finito	list_4-6:no staining no staining	list_7-8:no staining no staining	no staining	procrystal cell	crystal cell
Crystal_cell	PPO1	CG42639	784	1509	4910.34	54.6997	Set 1	6.46201	79.2365	cat_term:global_finito	list_4-6:no staining no staining	list_7-8:no staining no staining	no staining	procrystal cell	crystal cell ring gland
Crystal_cell	CG31324	CG31324	584	1977	3656.2	89.606	Set 1	5.33459	63.1431	cat_term:global_finito no staining	list_4-6:no staining no staining	list_7-8:no staining no staining	cat_term:finito9-10 no staining	no staining	brain crystal cell midgut no staining tracheal sys vent nerve cord
Crystal_cell	CG17109	CG17109	98	357	658.349	11.8427	Set 1	5.67984	53.1911	cat_term:global_finito	list_4-6:ubiquitous no staining	list_7-8:no staining no staining	no staining	procrystal cell	crystal cell
Crystal_cell	CG10602	CG10602	133	738	811.395	26.1078	Set 1	4.90362	47.3986	cat_term:global_finito maternal	cellular blastoderm list_4-6:ubiquitous ubiquitous	head mesoderm PR list_7-8:ubiquitous trunk mesoderm PR ubiquitous	head mesoderm PR trunk mesoderm PR ubiquitous	procrystal cell	crystal cell
Crystal_cell	crq	CG4280	253	1967	1647.21	82.1795	Set 1	4.30765	46.0345	maternal	AISN cellular blastoderm list_4-6:specific pole cell subset	ant endoderm A head mesoderm PR list_7-8:specific pole cell vent ectoderm PR	ant endoderm PR crystal cell SA germ cell head mesoderm PR plasmatocytes PR yolk nuclei	head mesoderm PR plasmatocytes A procrystal cell yolk nuclei	cat_term:global_finito crystal cell plasmatocytes
Crystal_cell	CG9119	CG9119	162	1483	1021.03	49.0579	Set 1	4.35029	43.4908	cat_term:global_finito	list_4-6:no staining no staining	list_7-8:no staining no staining	no staining	ant midgut PR post midgut PR procrystal cell yolk nuclei	crystal cell Malpighian tubule midgut midgut chamber yolk nuclei
Crystal_cell	Pxn	CG12002	482	4856	3149.82	224.042	Set 1	3.807	44.2431	cat_term:global_finito	list_4-6:no staining no staining	list_7-8:no staining no staining	cat_term:finito9-10 crystal cell SA head mesoderm PR no staining	garland cell PR plasmatocytes A post midgut PR procrystal cell	crystal cell garland cell lymph gland plasmatocytes sensory sys head
Crystal_cell	CG31431	CG31431	140	948	878.882	42.0806	Set 1	4.35056	42.5535	NA	list_4-6:specific post endoderm AISN	head mesoderm PR list_7-8:specific post endoderm PR yolk nuclei	amnioserosa ant endoderm PR crystal cell SA head mesoderm PR post endoderm PR yolk nuclei	amnioserosa ant midgut PR plasmatocytes A post midgut PR procrystal cell yolk nuclei	cat_term:global_finito crystal cell midgut midgut chamber plasmatocytes yolk nuclei
Crystal_cell	Men	CG10120	285	4543	1864.12	140.575	Set 1	3.71885	40.4055	cat_term:global_finito maternal	list_4-6:specific pole cell	list_7-8:no staining no staining	no staining	brain PR procrystal cell vent midline neuroblast vent nerve cord PR yolk nuclei	brain central nervous sys crystal cell dors epidermis lymph gland muscle sys oenocyte plasmatocytes somatic muscle vent midline vent nerve cord yolk nuclei
Crystal_cell	Elk	CG5076	74	428	463.514	20.1551	Set 1	4.45353	39.4564	NA	NA	NA	NA	NA	NA
Copper_cells_2	Vha100-4	CG7678	685	279	3139.98	11.484	Set 1	7.97453	92.6401	cat_term:global_finito	list_4-6:no staining no staining	list_7-8:no staining no staining	no staining	cuprophilic cells PR dors epidermis PR	cuprophilic cell midgut prothoracic gland ring gland
Copper_cells_2	CG31446	CG31446	182	36	893.897	1.57579	Set 1	8.43895	82.7488	NA	list_4-6:no staining	NA	NA	NA	NA
Copper_cells_2	lab	CG1264	2037	2354	9041.07	110.716	Set 1	6.33858	83.3044	cat_term:global_finito flag_for_volker maternal	cellular blastoderm faint ubiquitous hypopharynx AISN list_4-6:specific post endoderm AISN subset	ant endoderm A dors ectoderm PR foregut A hypopharynx A list_7-8:specific post endoderm PR	ant endoderm PR central brain PR P3 dors ridge A foregut PR hypopharynx PR post endoderm PR	ant midgut PR brain PR dors ridge PR P1 hypopharynx PR P1 post midgut PR	brain cuprophilic cell hypopharynx midgut midgut chamber midgut interstitial cell
Copper_cells_2	Pgcl	CG13374	69	130	317.071	5.53064	Set 1	5.60144	46.5659	NA	NA	NA	NA	NA	NA
Copper_cells_2	Ugt307A1	CG11289	19	6	104.633	0.22726	Set 1	6.41375	43.1191	NA	NA	NA	NA	NA	NA
Copper_cells_2	elB	CG4220	1080	9840	4759.14	437.97	Set 1	3.43851	42.0075	cat_term:global_finito maternal	faint ubiquitous ubiquitous	no staining	head epidermis dors PR no staining	brain PR dors epidermis PR head epidermis dors PR P1 hindgut proper PR post spiracle SA tracheal PR	brain dors epidermis dors prothoracic pharyngeal muscle foregut hindgut midgut post spiracle tracheal sys visceral muscle
Copper_cells_2	CG31087	CG31087	33	56	147.343	1.99989	Set 1	5.61813	40.5224	NA	NA	NA	NA	NA	NA
Copper_cells_2	out	CG8062	247	1762	1106.86	76.4681	Set 1	3.83672	38.8029	cat_term:global_finito maternal	list_4-6:no staining no staining	list_7-8:no staining no staining	cat_term:finito9-10 no staining	atrium PR fat body SA gnathal PR somatic muscle PR vent epidermis PR	cuprophilic cell hypopharyngeal sense organ hypopharynx midgut interstitial cell
Copper_cells_2	5-HT7	CG12073	237	1514	1017.03	72.9542	Set 1	3.78158	37.7839	no staining	no staining	no staining	no staining	no staining	cat_term:global_finito cuprophilic cell midgut interstitial cell
Copper_cells_2	CG5770	CG5770	23	16	111.207	0.781672	Set 1	5.96388	40.6142	cat_term:global_finito no staining	no staining	no staining	no staining	no staining	no staining
Copper_cells_2	Vha16-1	CG3161	2752	52805	12411.5	2076.07	Set 1	2.57905	35.0738	no staining	no staining	no staining	no staining	no staining	no staining
Copper_cells_2	HHEX	CG7056	87	540	410.599	26.1406	Set 1	3.9192	34.0387	maternal	ubiquitous	no staining	no staining	post midgut PR	cuprophilic cell midgut chamber
Copper_cells_2	Tsp42Ed	CG12846	129	929	562.882	36.6795	Set 1	3.90098	35.652	cat_term:global_finito	list_4-6:no staining no staining	list_7-8:no staining no staining	no staining	no staining	adult hindgut precursor cuprophilic cell hindgut midgut midgut interstitial cell proventriculus proventriculus outer layer
Copper_cells_2	Tsp42Ec	CG12847	30	74	136.962	3.11168	Set 1	5.0579	35.9522	maternal	list_4-6:no staining no staining	list_7-8:no staining no staining	cat_term:finito9-10 no staining	no staining	cat_term:global_finito midgut chamber
Copper_cells_2	Ptx1	CG1447	269	3284	1213.62	147.851	Set 1	3.02737	31.0193	cat_term:global_finito maternal	cellular blastoderm endoderm AISN list_4-6:specific post endoderm AISN subset	list_7-8:no staining post endoderm PR	post endoderm PR vent nerve cord PR P3	brain PR central brain glia cuprophilic cells PR ganglion mother cell Malpighian tubule main body PR Malpighian tubule PR neuroblasts of vent nervous sys post midgut PR somatic muscle PR vent nerve cord PR	brain cat_term:any_neural cat_term:subset_CNS central brain glia central brain neuron central nervous sys cuprophilic cell hindgut lateral cord glia lateral cord neuron Malpighian tubule Malpighian tubule tip cell midgut midgut chamber somatic muscle vent nerve cord
Copper_cells_2	Tsp29Fb	CG9496	92	1018	437.545	40.2196	Set 1	3.40803	29.9109	NA	NA	NA	NA	NA	NA
Copper_cells_2	CG12974	CG12974	50	437	252.857	19.9417	Set 1	3.59387	28.7074	no staining	no staining	no staining yolk nuclei	no staining yolk nuclei	no staining	no staining
Copper_cells_2	CG42668	CG42668	214	2803	1001.57	129.927	Set 1	2.93543	29.2647	flag_for_volker maternal	list_4-6:no staining no staining pole cell rapidly degraded	list_7-8:no staining no staining pole cell	ant endoderm PR cat_term:finito9-10 germ cell no staining post endoderm PR	ant midgut PR no staining post midgut PR visceral muscle PR	cat_term:global_finito cuprophilic cell hindgut midgut midgut interstitial cell proventriculus proventriculus outer layer visceral muscle
Copper_cells_2	Tsp42Eq	CG12832	35	223	161.556	8.43792	Set 1	4.09742	30.0947	cat_term:global_finito no staining	no staining	no staining	no staining	no staining	no staining
Copper_cells_2	trol	CG33950	2250	46128	10020	2208.96	Set 1	2.18079	28.9843	cat_term:global_finito no staining	list_4-6:no staining no staining	list_7-8:no staining no staining	no staining	germ cell no staining	circulatory sys dors epidermis dors vessel epipharynx foregut sensory structure hypopharynx lateral cord lateral cord glia lymph gland midgut muscle sys no staining proventriculus proventriculus inner layer proventriculus intermediate layer proventriculus outer layer ring gland somatic muscle vent midline vent nerve cord
Posterior_midgut_2	Lim3	CG10699	2148	2735	2856.63	121.516	Set 1	4.54327	52.1595	maternal no staining	no staining	no staining	no staining	no staining	brain cat_term:global_finito gastric caecum proventriculus vent nerve cord
Posterior_midgut_2	CG4562	CG4562	719	673	935.713	26.8058	Set 1	5.07261	50.074	maternal no staining ubiquitous	no staining	hindgut A no staining	inclusive hindgut PR no staining	no staining	Malpighian tubule no staining salivary gland
Posterior_midgut_2	Jheh3	CG15106	1144	1883	1558.69	78.86	Set 1	4.28672	45.4694	NA	NA	NA	NA	NA	NA
Posterior_midgut_2	CG15347	CG15347	1592	3205	2157.56	145.986	Set 1	3.87566	42.9262	cat_term:global_finito no staining	list_4-6:no staining no staining	list_7-8:no staining no staining	no staining	amnioserosa no staining yolk nuclei	amnioserosa gastric caecum midgut midgut chamber yolk nuclei
Posterior_midgut_2	CG33993	CG33993	1764	4330	2357.26	193.412	Set 1	3.59992	40.3318	cat_term:global_finito	AISN cellular blastoderm gap list_4-6:specific post endoderm AISN subset	hindgut A post endoderm PR	ant endoderm PR inclusive hindgut PR post endoderm PR	ant midgut PR clypeo-labral PR gnathal PR labral sensory complex PR Malpighian tubule main body PR Malpighian tubule PR post midgut PR	atrium epipharynx labral sensory complex Malpighian tubule midgut vent epidermis
Posterior_midgut_2	CG4734	CG4734	169	145	244.008	6.05187	Set 1	5.11278	40.5785	NA	NA	NA	NA	NA	NA
Posterior_midgut_2	grn	CG9656	4934	17017	6439.08	735.446	Set 1	3.1282	39.5808	cat_term:global_finito maternal no staining	dors ectoderm AISN list_4-6:no staining maternal no staining procephalic ectoderm AISN	dors ectoderm PR list_7-8:no staining no staining procephalic ectoderm A	clypeolabrum PR dors epidermis A no staining procephalic ectoderm PR	brain PR clypeo-labral PR dors epidermis PR no staining post spiracle SA	brain cuprophilic cell dors epidermis epipharynx midgut no staining post spiracle proventriculus
Posterior_midgut_2	CG15365	CG15365	1090	2859	1452.77	129.399	Set 1	3.47781	36.5364	maternal	NA	NA	NA	NA	NA
Posterior_midgut_2	Lfg	CG3814	605	1425	798.384	61.252	Set 1	3.68089	35.4939	cat_term:global_finito	list_4-6:no staining no staining	list_7-8:no staining no staining	no staining	no staining	midgut midgut chamber
Posterior_midgut_2	ana	CG8084	292	638	403.498	30.156	Set 1	3.69498	31.9985	NA	NA	NA	NA	NA	NA
Posterior_midgut_2	CG17636	CG17636	95	111	133.789	4.37127	Set 1	4.63855	32.8157	NA	NA	NA	NA	NA	NA
Posterior_midgut_2	CG4301	CG4301	352	820	480.249	37.2145	Set 1	3.65159	32.538	cat_term:global_finito no staining	no staining	no staining	no staining	no staining	no staining
Posterior_midgut_2	al	CG3935	396	1003	513.047	45.467	Set 1	3.46481	31.2033	cat_term:global_finito maternal	no staining	list_7-8:no staining no staining	dors ectoderm PR labial complex SA maxillary organ SA vent ectoderm PR	antennal PR1 labial sensory complex PR leading edge cell SA maxillary sensory complex PR sensory nervous sys SA vent epidermis PR	antennal sense organ dors epidermis head epidermis labial sensory complex leading edge cell maxillary sensory complex midgut midgut chamber proventriculus proventriculus intermediate layer vent epidermis
Posterior_midgut_2	Agpat4	CG4753	858	3104	1157.71	134.46	Set 1	3.09533	31.5052	cat_term:global_finito maternal	list_4-6:no staining no staining	list_7-8:no staining no staining	no staining	ant midgut PR post midgut PR	midgut midgut chamber
Posterior_midgut_2	sog	CG9224	1922	8967	2521.98	373.233	Set 1	2.75255	31.1063	cat_term:global_finito flag_for_volker	list_4-6:specific mesectoderm AISN subset vent ectoderm AISN	central brain A head mesoderm PR list_7-8:specific mesectoderm PR procephalic ectoderm A vent ectoderm PR vent nerve cord A	central brain PR P3 mesectoderm PR vent nerve cord PR P3	lateral cord midline PR vent epidermis PR vent midline glia	epipharynx hypopharynx midgut vent epidermis
Posterior_midgut_2	CG15818	CG15818	342	700	447.802	30.2192	Set 1	3.84236	33.8509	cat_term:global_finito	list_4-6:no staining no staining	list_7-8:no staining no staining	no staining	no staining	cat_term:global_finito midgut proventriculus
Posterior_midgut_2	SLC22A	CG7442	165	317	225.877	13.1278	Set 1	3.99892	31.2947	no staining	no staining	no staining	no staining	no staining	gastric caecum midgut
Posterior_midgut_2	Jheh1	CG15101	710	2739	968.108	109.749	Set 1	3.12788	31.0302	cat_term:global_finito	list_4-6:no staining no staining	list_7-8:no staining no staining	no staining	fat body/gonad PR	fat body midgut
Posterior_midgut_2	CG4781	CG4781	402	1194	539.568	51.7357	Set 1	3.35495	30.4574	cat_term:finito1-3 cat_term:global_finito	cat_term:finito4-6 no staining	cat_term:finito7-8 list_7-8:no staining no staining	cat_term:finito9-10 no staining	cat_term:finito11-12 no staining	cat_term:finito13-16 gastric caecum midgut midgut chamber
Posterior_midgut_2	CG10650	CG10650	512	1886	709.643	80.6809	Set 1	3.11902	29.5465	no staining	list_4-6:no staining no staining	list_7-8:no staining no staining	cat_term:finito9-10 no staining	no staining	cat_term:global_finito midgut midgut chamber proventriculus outer layer
Embryonic_body_wall	Act57B	CG10067	148265	28363	5202.06	877.416	Set 1	2.56611	31.679	maternal	list_4-6:no staining maternal no staining	list_7-8:no staining list_7-8:ubiquitous no staining ubiquitous	cat_term:finito9-10 no staining ubiquitous	dors pharyngeal muscle PR muscle sys PR somatic muscle PR visceral muscle PR	cat_term:global_finito dors prothoracic pharyngeal muscle muscle sys somatic muscle visceral muscle
Embryonic_body_wall	CG2962	CG2962	99075	12169	3508.87	602.851	Set 1	2.53874	29.8992	NA	list_4-6:no staining no staining	no staining	cat_term:finito9-10 no staining	no staining	cat_term:global_finito dors epidermis vent epidermis
Embryonic_body_wall	CG15731	CG15731	19656	1894	689.379	86.861	Set 1	2.972	28.0297	cat_term:finito1-3 cat_term:global_finito maternal	cat_term:finito4-6 list_4-6:ubiquitous ubiquitous	ant endoderm A cat_term:finito7-8 head mesoderm PR list_7-8:ubiquitous post endoderm PR trunk mesoderm PR ubiquitous	cat_term:finito9-10 faint ubiquitous ubiquitous	cat_term:finito11-12 faint ubiquitous	cat_term:finito13-16 dors epidermis faint ubiquitous head epidermis vent epidermis
Embryonic_body_wall	Mlc2	CG2184	79663	17297	2743.04	561.591	Set 1	2.28562	26.1065	NA	list_4-6:no staining no staining	list_7-8:no staining no staining	cat_term:finito9-10 no staining	no staining	cat_term:global_finito dors prothoracic pharyngeal muscle muscle sys somatic muscle visceral muscle
Embryonic_body_wall	TwdlF	CG14639	45244	6161	1582.23	312.788	Set 1	2.3341	24.8083	cat_term:global_finito	list_4-6:no staining no staining	list_7-8:no staining no staining	no staining	no staining	dors epidermis head epidermis vent epidermis
Embryonic_body_wall	Ipod	CG2961	33599	4423	1166.99	224.211	Set 1	2.37344	24.185	cat_term:global_finito	list_4-6:no staining no staining	list_7-8:no staining no staining	no staining	no staining	dors epidermis head epidermis vent epidermis
Embryonic_body_wall	Neurochondrin	CG2330	15657	2254	545.371	93.7774	Set 1	2.52462	22.9582	NA	list_4-6:no staining no staining	list_7-8:no staining no staining	no staining	muscle sys PR	cat_term:global_finito dors prothoracic pharyngeal muscle muscle sys somatic muscle visceral muscle visceral muscle of esophagus
Embryonic_body_wall	CG9083	CG9083	35113	5337	1244.72	271.682	Set 1	2.19053	22.5247	cat_term:global_finito	list_4-6:no staining	list_7-8:no staining no staining	no staining	no staining	dors epidermis head epidermis hypopharynx vent epidermis
Embryonic_body_wall	TwdlM	CG5468	11652	1573	395.147	69.4446	Set 1	2.48783	21.4697	cat_term:global_finito maternal	list_4-6:no staining no staining	list_7-8:no staining no staining	no staining	no staining	dors epidermis head epidermis
Embryonic_body_wall	CG15022	CG15022	14823	1939	501.99	101.671	Set 1	2.28963	20.548	cat_term:global_finito	no staining	list_7-8:no staining no staining	no staining	no staining	dors epidermis
Embryonic_body_wall	RpL23A	CG7977	149790	43447	5205.26	1601.84	Set 1	1.69934	20.9801	cat_term:global_finito ubiquitous	ubiquitous	ubiquitous	ubiquitous	ubiquitous	ubiquitous
Embryonic_body_wall	Tm2	CG4843	25555	6125	887.771	203.881	Set 1	2.1154	20.7217	NA	list_4-6:ubiquitous	NA	NA	circular visceral mesoderm PR somatic muscle PR	cat_term:global_finito muscle sys somatic muscle visceral muscle
Embryonic_body_wall	TwdlD	CG14243	10267	1273	349.468	63.4444	Set 1	2.43904	20.6175	cat_term:global_finito	list_4-6:no staining no staining	no staining	no staining	no staining	dors epidermis head epidermis head epidermis dors vent epidermis
Embryonic_body_wall	slbo	CG4354	22290	3410	755.333	171.2	Set 1	2.13302	20.3978	cat_term:global_finito	list_4-6:specific no staining	list_7-8:specific no staining	no staining	post spiracle SA	dors epidermis head epidermis post spiracle vent epidermis
Embryonic_body_wall	TwdlY	CG32570	4955	562	167.702	26.3057	Set 1	2.61863	19.3735	NA	NA	NA	NA	NA	NA
Embryonic_body_wall	Vajk4	CG30101	12855	1615	431.178	80.4674	Set 1	2.40399	21.0481	cat_term:global_finito	list_4-6:no staining no staining	list_7-8:no staining no staining	cat_term:finito9-10 no staining	vent epidermis PR	dors epidermis epipharynx head epidermis head epidermis dors hypopharynx oenocyte post spiracle tracheal sys vent epidermis vent sensory complex PR
Embryonic_body_wall	Cpr64Ad	CG1259	8279	1190	293.065	56.3054	Set 1	2.35448	19.3067	maternal	no staining	no staining	no staining	no staining	cat_term:global_finito dors trunk salivary gland common duct tracheal sys
Embryonic_body_wall	CG7675	CG7675	17068	2898	591.701	129.408	Set 1	2.18183	20.0972	cat_term:global_finito	list_4-6:no staining no staining	list_7-8:no staining no staining	cat_term:finito9-10 no staining	hindgut proper PR optic lobe PR post spiracle SA	dors epidermis epipharynx foregut hindgut hypopharynx optic lobe post spiracle vent epidermis
Endoderm_PR	Hk	CG43388	469	994	414.467	40.9005	Set 1	3.30622	28.7594	cat_term:global_finito maternal	list_4-6:no staining no staining ubiquitous	list_7-8:no staining no staining ubiquitous	post endoderm PR ubiquitous	post midgut PR ubiquitous	no staining ubiquitous
Endoderm_PR	Sox21a	CG7345	220	314	204.349	12.6316	Set 1	3.906	30.0057	maternal no staining	no staining ubiquitous	faint ubiquitous no staining	faint ubiquitous no staining	faint ubiquitous no staining	faint ubiquitous no staining
Endoderm_PR	CG42594	CG42594	546	1757	499.86	80.3129	Set 1	2.61997	23.4966	NA	NA	NA	NA	NA	NA
Endoderm_PR	Myc	CG10798	5229	28970	4478.71	1181.41	Set 1	1.92135	23.3044	(localised) cat_term:global_finito flag_for_volker maternal no staining pole plasm	AISN ant endoderm AISN cellular blastoderm endoderm AISN foregut AISN head mesoderm AISN hindgut AISN list_4-6:specific no staining post endoderm A post endoderm AISN procephalic ectoderm AISN subset trunk mesoderm AISN ubiquitous	ant endoderm A clypeolabrum A foregut A head mesoderm PR hindgut A list_7-8:specific post endoderm PR trunk mesoderm PR	ant endoderm PR clypeolabrum PR foregut PR head mesoderm PR inclusive hindgut PR post endoderm PR salivary gland body SA trunk mesoderm PR	anal pad SA ant midgut PR clypeo-labral PR dors pharyngeal muscle PR foregut PR hindgut proper PR hypopharynx PR P1 post midgut PR proventriculus PR salivary gland body PR somatic muscle PR tracheal PR trunk mesoderm PR	anal pad corpus cardiacum dors prothoracic pharyngeal muscle epipharynx fat body hindgut hypopharynx large intestine lymph gland midgut muscle sys proventriculus salivary gland duct somatic muscle
Endoderm_PR	TyrR	CG7431	177	497	158.972	21.3026	Set 1	2.83349	20.7459	NA	NA	NA	NA	NA	NA
Endoderm_PR	rols	CG32096	2341	11718	1999.58	541.016	Set 1	1.88329	20.6525	cat_term:global_finito flag_for_volker	list_4-6:no staining no staining	list_7-8:no staining no staining	cat_term:finito9-10 dors ectoderm PR no staining post endoderm PR	amnioserosa ant midgut PR cat_term:finito11-12 dors epidermis PR dors pharyngeal muscle PR muscle sys PR post midgut PR sensory nervous sys SA somatic muscle PR visceral muscle PR	dors epidermis epipharynx head epidermis hindgut hypopharynx Malpighian tubule midgut muscle sys post spiracle sensory nervous sys PR somatic muscle tracheal sys visceral muscle
Endoderm_PR	CG34347	CG34347	2195	9970	1804.22	475.143	Set 1	1.92191	20.7911	NA	NA	NA	NA	NA	NA
Endoderm_PR	bru2	CG43065	2467	13213	2160.4	616.191	Set 1	1.80751	20.0231	NA	NA	NA	NA	NA	NA
Endoderm_PR	dally	CG4974	2633	14908	2211.53	664.613	Set 1	1.73229	19.2483	NA	NA	NA	NA	NA	NA
Endoderm_PR	DNaseII	CG7780	196	723	183.731	30.2392	Set 1	2.55616	19.2461	no staining	ant endoderm AISN endoderm AISN list_4-6:specific post endoderm AISN	ant endoderm A list_7-8:specific post endoderm PR	ant endoderm PR post endoderm PR	ant midgut PR post midgut PR	cat_term:global_finito fat body
Endoderm_PR	Gmap	CG33206	2278	13836	2062.76	658.165	Set 1	1.64586	18.1227	maternal ubiquitous	faint ubiquitous post	ant endoderm A post endoderm PR	ant endoderm PR post endoderm PR	anal pad SA ant midgut PR post midgut PR salivary gland PR	anal pad lymph gland midgut salivary gland
Endoderm_PR	wb	CG42677	1877	10485	1572.56	483.73	Set 1	1.69786	18.031	NA	NA	NA	NA	NA	NA
Endoderm_PR	lab	CG1264	604	2990	519.868	139.43	Set 1	1.88829	17.0414	cat_term:global_finito flag_for_volker maternal	cellular blastoderm faint ubiquitous hypopharynx AISN list_4-6:specific post endoderm AISN subset	ant endoderm A dors ectoderm PR foregut A hypopharynx A list_7-8:specific post endoderm PR	ant endoderm PR central brain PR P3 dors ridge A foregut PR hypopharynx PR post endoderm PR	ant midgut PR brain PR dors ridge PR P1 hypopharynx PR P1 post midgut PR	brain cuprophilic cell hypopharynx midgut midgut chamber midgut interstitial cell
Endoderm_PR	grn	CG9656	2741	16995	2336.92	754.662	Set 1	1.62879	18.2278	cat_term:global_finito maternal no staining	dors ectoderm AISN list_4-6:no staining maternal no staining procephalic ectoderm AISN	dors ectoderm PR list_7-8:no staining no staining procephalic ectoderm A	clypeolabrum PR dors epidermis A no staining procephalic ectoderm PR	brain PR clypeo-labral PR dors epidermis PR no staining post spiracle SA	brain cuprophilic cell dors epidermis epipharynx midgut no staining post spiracle proventriculus
Endoderm_PR	CG42238	CG42238	4928	33403	4124.53	1514.54	Set 1	1.4444	17.3478	maternal	ubiquitous	pole cell ubiquitous	ubiquitous	ubiquitous	ubiquitous
Endoderm_PR	NK7.1	CG8524	1523	8237	1257.13	385.075	Set 1	1.70318	17.5378	cat_term:global_finito maternal	list_4-6:no staining no staining post endoderm AISN	list_7-8:no staining no staining post endoderm PR	no staining	ant midgut PR head mesoderm PR no staining post midgut PR post spiracle SA trunk mesoderm PR	cat_term:global_finito labral sensory complex midgut chamber post spiracle procephalic vascular rudiment proventriculus somatic muscle
Endoderm_PR	Ance	CG8827	1442	8907	1288.96	388.903	Set 1	1.72502	17.8248	cat_term:global_finito	AISN amnioserosa AISN dors ectoderm AISN ectoderm AISN list_4-6:specific procephalic ectoderm AISN subset	amnioserosa A ant endoderm A dors ectoderm PR hindgut A list_7-8:specific procephalic ectoderm A	amnioserosa amnioserosa PR ant endoderm PR inclusive hindgut PR post endoderm PR	amnioserosa ant midgut PR head epidermis dors PR P1 Malpighian tubule PR post midgut PR proventriculus PR	amnioserosa head epidermis head epidermis dors hindgut lymph gland midgut prothoracic gland proventriculus ring gland
Endoderm_PR	Gyc32E	CG33114	173	598	146.29	22.3383	Set 1	2.64806	19.0726	NA	NA	NA	NA	NA	NA
Endoderm_PR	pigs	CG3973	1769	11519	1526.39	525.547	Set 1	1.53549	16.2406	cat_term:global_finito no staining	no staining	no staining	no staining	no staining	no staining
Endoderm_PR	Pdp1	CG17888	7207	55011	6061.77	2421.04	Set 1	1.32352	16.631	maternal no staining	no staining post endoderm AISN	post endoderm PR	ant endoderm PR post endoderm PR	anal pad SA ant midgut PR head mesoderm PR post midgut PR	anal pad dors prothoracic pharyngeal muscle fat body midgut muscle sys visceral muscle of esophagus
Ectoderm_A	Notum	CG13076	566	4246	833.198	184.111	Set 1	2.17027	21.0609	NA	NA	NA	NA	NA	NA
Ectoderm_A	link	CG13333	565	5369	831.115	218.319	Set 1	1.92202	18.6448	cat_term:global_finito flag_for_volker	dors ectoderm AISN list_4-6:specific procephalic ectoderm AISN vent ectoderm AISN visual AISN	NA	dors ectoderm PR foregut PR inclusive hindgut PR mesectoderm PR procephalic ectoderm PR vent ectoderm PR visual PR	central brain glia central brain neuron clypeo-labral PR dors epidermis PR foregut PR hindgut proper PR inner optic lobe PR large intestine SA midline PR optic lobe PR tracheal PR	cat_term:any_neural cat_term:subset_CNS central brain epipharynx foregut head epidermis hypopharynx inner optic lobe optic lobe outer optic lobe sensory nervous sys PR sensory sys head tracheal sys vent midline
Ectoderm_A	N	CG3936	2974	33154	4064.16	1407.95	Set 1	1.52834	18.3234	NA	NA	NA	NA	NA	epipharynx hypopharynx
Ectoderm_A	Ama	CG2198	907	10287	1380.64	422.918	Set 1	1.70348	17.771	cat_term:global_finito flag_for_volker maternal	AISN amnioserosa AISN cellular blastoderm dors ectoderm AISN list_4-6:specific mesoderm AISN procephalic ectoderm AISN subset ubiquitous vent ectoderm AISN visual AISN	dors ectoderm PR head mesoderm PR list_7-8:specific procephalic ectoderm A trunk mesoderm PR ubiquitous vent ectoderm PR vent nerve cord A	amnioserosa dors ectoderm PR head mesoderm PR procephalic ectoderm PR trunk mesoderm PR ubiquitous vent ectoderm PR vent nerve cord PR P3	amnioserosa ant midgut PR dors epidermis PR faint ubiquitous gnathal PR head mesoderm PR hypopharynx PR P1 lateral cord glia lateral cord neuron optic lobe PR post midgut PR sensory nervous sys SA trunk mesoderm PR vent epidermis PR yolk nuclei	adult midgut precursor amnioserosa dors epidermis faint ubiquitous midgut optic lobe sensory nervous sys PR tracheal sys vent epidermis vent nerve cord vent sensory complex PR yolk nuclei
Ectoderm_A	bib	CG4722	415	4023	642.844	168.537	Set 1	1.92287	17.9415	cat_term:global_finito	AISN list_4-6:specific subset ubiquitous	list_7-8:specific ubiquitous	ubiquitous	brain PR optic lobe PR pars intercerebralis PR pericardial cell SA stomatogastric nervous sys PR tracheal PR trunk mesoderm PR vent epidermis PR	brain central brain neuron central brain pars intercerebralis optic lobe stomatogastric nervous sys tracheal sys
Ectoderm_A	pre-lola-G	CG44025	151	1138	237.595	49.1998	Set 1	2.24275	17.7142	NA	NA	NA	NA	NA	NA
Ectoderm_A	DIP-alpha	CG32791	249	2159	390.243	94.6673	Set 1	2.02827	17.4673	cat_term:global_finito	no staining	list_7-8:no staining no staining	no staining	no staining	brain vent midline vent midline glia vent nerve cord
Ectoderm_A	pnt	CG17077	1824	20453	2423.65	876.168	Set 1	1.46626	16.486	maternal	foregut AISN procephalic ectoderm AISN ubiquitous	clypeolabrum A foregut A procephalic ectoderm A ubiquitous vent ectoderm PR	clypeolabrum PR dors ectoderm PR foregut PR procephalic ectoderm PR segmentally repeated trunk mesoderm PR ubiquitous vent ectoderm PR	brain PR clypeo-labral PR dors epidermis PR foregut PR head epidermis PR P1 hindgut proper PR segmentally repeated trunk mesoderm PR ubiquitous vent epidermis PR vent nerve cord PR	brain circulatory sys clypeolabrum dors epidermis esophagus faint ubiquitous head epidermis hindgut longitudinal visceral muscle fibers muscle sys oenocyte proventriculus vent nerve cord
Ectoderm_A	Tet	CG43444	3891	47919	5057.27	1977.14	Set 1	1.35422	16.6628	cat_term:global_finito	list_4-6:no staining no staining	hindgut A list_7-8:specific procephalic ectoderm A vent ectoderm PR	inclusive hindgut PR procephalic ectoderm PR vent nerve cord PR P3 visual PR	brain PR central brain glia central brain neuron faint ubiquitous hindgut proper PR lateral cord glia lateral cord neuron neuroblasts of vent nervous sys optic lobe PR procephalic neuroblasts proventriculus PR vent nerve cord PR	brain cat_term:any_neural cat_term:PNS central nervous sys lateral cord neuron sensory nervous sys PR vent nerve cord vent sensory complex PR
Ectoderm_A	Abd-B	CG11648	613	8353	1068.2	356.349	Set 1	1.57978	15.8963	flag_for_volker no staining	dors ectoderm A dors ectoderm AISN gap list_4-6:specific mesoderm AISN no staining trunk mesoderm A vent ectoderm A vent ectoderm AISN	dors ectoderm PR gap no staining trunk mesoderm PR vent ectoderm PR	dors ectoderm PR gap no staining trunk mesoderm PR vent ectoderm PR vent epidermis PR vent nerve cord PR P3	cardiac mesoderm PR dors epidermis PR muscle sys PR no staining post spiracle SA vent epidermis PR vent nerve cord PR visceral muscle PR	amnioserosa dors epidermis dors trunk dors vessel hindgut muscle sys no staining post spiracle vent epidermis vent nerve cord
Ectoderm_A	CG7884	CG7884	187	1388	274.973	60.6926	Set 1	2.15612	17.4826	cat_term:global_finito no staining	no staining	no staining	no staining	no staining	no staining
Ectoderm_A	SKIP	CG31163	3226	38734	4241.41	1782.5	Set 1	1.24983	15.0613	flag_as_incompleto	NA	NA	inclusive hindgut PR	ant midgut PR brain PR central brain neuron dors epidermis PR hindgut proper PR post midgut PR vent nerve cord PR	brain central nervous sys dors epidermis hindgut midgut vent nerve cord
Ectoderm_A	sca	CG17579	478	5310	665.149	219.773	Set 1	1.59112	14.9242	no staining	no staining	no staining	no staining	no staining	no staining
Ectoderm_A	Cpr60D	CG30163	9	43	15.6933	0.568279	Set 1	3.3229	13.4949	NA	NA	NA	NA	NA	NA
Ectoderm_A	ed	CG12676	5114	71876	6931.35	3168.24	Set 1	1.129	14.405	cat_term:global_finito maternal	cellular blastoderm list_4-6:ubiquitous maternal	list_7-8:ubiquitous ubiquitous	dors epidermis A ubiquitous	atrium PR cat_term:finito11-12 clypeo-labral PR dors epidermis PR foregut PR head epidermis PR P1 hindgut proper PR ubiquitous vent epidermis PR	atrium cat_term:finito13-16 clypeolabrum dors epidermis dors vessel epipharynx foregut head epidermis head epidermis lateral head epidermis vent hindgut hypopharynx large intestine Malpighian tubule optic lobe tracheal sys vent epidermis visceral branch
Ectoderm_A	upd1	CG5993	98	780	145.548	30.6721	Set 1	2.20021	15.831	NA	NA	NA	NA	NA	NA
Ectoderm_A	nmo	CG7892	4444	63032	5921.91	2696.62	Set 1	1.13438	14.2161	cat_term:global_finito maternal	cellular blastoderm list_4-6:ubiquitous maternal	list_7-8:ubiquitous ubiquitous	ubiquitous	ubiquitous	brain cat_term:any_neural cat_term:pan_CNS central nervous sys dors epidermis head epidermis optic lobe sensory sys head vent epidermis vent nerve cord
Ectoderm_A	ds	CG17941	1377	16796	1755.76	718.637	Set 1	1.28675	13.8695	NA	NA	NA	NA	NA	NA
Ectoderm_A	HnRNP-K	CG13425	1273	16275	1722.92	710.126	Set 1	1.27668	13.7262	maternal	maternal ubiquitous	ubiquitous	ubiquitous	brain PR dors/lateral sensory complexes PR ubiquitous vent nerve cord PR	brain dors/lateral sensory complexes sensory sys head ubiquitous vent nerve cord
Ectoderm_A	CG10035	CG10035	193	1962	276.769	76.8191	Set 1	1.83049	14.8594	cat_term:global_finito ubiquitous	ubiquitous	ubiquitous	ubiquitous	ubiquitous	ubiquitous
Epidermis	Osi6	CG1151	98031	76675	16637	3003.51	Set 1	2.46919	34.6235	cat_term:finito1-3 cat_term:global_finito	cat_term:finito4-6 list_4-6:no staining no staining	cat_term:finito7-8 list_7-8:no staining no staining	cat_term:finito9-10 no staining	cat_term:finito11-12 no staining	atrium cat_term:finito13-16 dors epidermis foregut head epidermis hypopharynx vent epidermis
Epidermis	ELOVL	CG2781	8304	4710	1356.47	171.723	Set 1	2.97333	30.9425	no staining	no staining	list_7-8:no staining no staining	cat_term:finito9-10 no staining	no staining	atrium cat_term:global_finito dors epidermis epipharynx esophagus head epidermis hindgut hypopharynx post spiracle vent epidermis
Epidermis	dsx-c73A	CG32159	10878	6308	1812.77	257.43	Set 1	2.81035	30.4214	cat_term:global_finito	list_4-6:no staining no staining	list_7-8:no staining no staining	cat_term:finito9-10 no staining	foregut PR hypopharynx PR P1 post spiracle SA	atrium dors epidermis dors imaginal precursor epipharynx foregut hindgut hypopharynx Malpighian tubule tip cell post spiracle rectum vent epidermis
Epidermis	CG9184	CG9184	35987	31475	6155.28	1229.42	Set 1	2.32267	29.2374	cat_term:global_finito no staining	list_4-6:no staining no staining	no staining	cat_term:finito9-10 dors ectoderm PR no staining	dors epidermis PR dorsomedial neurosecretory cell	corpus cardiacum dors epidermis ring gland vent epidermis
Epidermis	CG33978	CG33978	9505	6480	1567.58	241.705	Set 1	2.69127	28.5685	NA	NA	NA	NA	NA	NA
Epidermis	stw	CG42345	4170	2215	685.576	85.4116	Set 1	2.98802	28.1569	no staining	NA	NA	NA	NA	NA
Epidermis	f	CG42864	3116	1447	512.631	57.5987	Set 1	3.12898	28.1752	NA	NA	NA	NA	NA	NA
Epidermis	dyl	CG15013	14501	11398	2393.34	423.716	Set 1	2.49445	28.0013	epi_combo no staining	no staining	no staining	no staining	no staining	dors epidermis foregut head epidermis hindgut post spiracle vent epidermis
Epidermis	bbg	CG42230	18555	13596	3059.03	564.086	Set 1	2.43653	28.2134	cat_term:global_finito	dors ectoderm AISN hindgut AISN list_4-6:specific post endoderm AISN procephalic ectoderm AISN subset	dors ectoderm PR foregut A hindgut A list_7-8:specific mesectoderm PR post endoderm PR procephalic ectoderm A	ant endoderm PR dors ectoderm PR foregut PR inclusive hindgut PR mesectoderm PR post endoderm PR	ant midgut PR dors epidermis PR foregut PR hindgut proper PR post midgut PR proventriculus PR small intestine SA	dors epidermis epipharynx foregut hindgut hypopharynx midgut proventriculus ring gland sensory nervous sys PR small intestine vent epidermis vent midline
Epidermis	frm	CG10625	4596	2999	702.999	95.1306	Set 1	2.87046	27.1529	cat_term:global_finito no staining	list_4-6:no staining no staining	list_7-8:no staining no staining	no staining	no staining	dors epidermis head epidermis no staining vent epidermis
Epidermis	CG10591	CG10591	23716	21062	4028.51	825.688	Set 1	2.28483	27.364	cat_term:global_finito	list_4-6:no staining no staining	list_7-8:no staining no staining	no staining	dors apodeme SA dors epidermis PR garland cell PR vent apodeme SA vent epidermis PR	dors apodeme dors epidermis vent apodeme vent epidermis
Epidermis	IRSp53	CG32082	7165	4677	1215.69	196.478	Set 1	2.62201	26.8723	NA	NA	NA	NA	NA	NA
Epidermis	CG10211	CG10211	9634	7634	1621.51	285.164	Set 1	2.50243	26.6859	cat_term:global_finito	no staining	list_7-8:no staining no staining	no staining	no staining	anal pad atrium clypeolabrum dors epidermis epipharynx esophagus head epidermis hypopharynx proventriculus vent epidermis
Epidermis	CG32694	CG32694	4043	2377	608.9	87.9748	Set 1	2.77474	25.673	cat_term:global_finito	list_4-6:no staining no staining	list_7-8:no staining no staining	no staining	no staining	dors epidermis epipharynx esophagus head epidermis hypopharynx proventriculus proventriculus inner layer salivary gland duct vent epidermis
Epidermis	Cht6	CG43374	5936	4095	969.785	152.553	Set 1	2.65893	26.3846	NA	NA	NA	NA	NA	NA
Epidermis	CG15239	CG15239	8358	6452	1411.55	237.534	Set 1	2.56501	26.8405	maternal no staining	maternal no staining	no staining ubiquitous	no staining ubiquitous	no staining ubiquitous	dors epidermis esophagus head epidermis salivary gland ubiquitous vent epidermis
Epidermis	CG41520	CG41520	4634	2551	750.948	115.883	Set 1	2.68365	25.6409	flag_for_volker no staining	no staining	no staining	no staining	no staining	epipharynx hypopharynx post spiracle vent epidermis
Epidermis	ImpE2	CG1934	14476	13175	2456.94	491.114	Set 1	2.3198	26.1284	cat_term:global_finito	ant endoderm AISN endoderm AISN foregut AISN list_4-6:specific post endoderm AISN subset	ant endoderm A foregut A list_7-8:specific post endoderm PR procephalic ectoderm A	ant endoderm PR foregut PR post endoderm PR	ant midgut PR foregut PR post midgut PR	corpus cardiacum dors epidermis esophagus foregut salivary gland duct sensory sys head stomatogastric nervous sys tracheal sys vent epidermis
Epidermis	tyn	CG17131	32160	30111	5380.91	1297.09	Set 1	2.05146	25.4257	NA	NA	NA	NA	NA	NA
Epidermis	sha	CG13209	3744	2330	643.197	97.9219	Set 1	2.7009	25.2031	cat_term:global_finito	list_4-6:no staining no staining	no staining	no staining	no staining	dors epidermis vent epidermis
Epicuticle	CG11581	CG11581	283	36	2455.32	0.954397	Set 1	10.295	115.945	no staining	no staining	no staining	no staining	no staining	dors prothoracic pharyngeal muscle proventriculus somatic muscle
Epicuticle	Tb	CG5480	911	520	8497.4	19.5046	Set 1	8.69493	113.495	cat_term:global_finito	list_4-6:no staining no staining	no staining	no staining	no staining	dors epidermis head epidermis dors head epidermis lateral head epidermis vent vent epidermis
Epicuticle	TwdlR	CG31081	108	7	1076.88	0.251742	Set 1	9.7487	98.2083	NA	NA	NA	NA	NA	NA
Epicuticle	CG9757	CG9757	421	375	3860.2	10.3024	Set 1	8.41591	100.274	NA	NA	NA	NA	NA	NA
Epicuticle	Cpr47Ec	CG9077	111	46	1149.23	1.3315	Set 1	8.9452	90.9522	no staining	no staining	no staining	no staining	no staining	no staining
Epicuticle	CG3355	CG3355	308	264	2662.17	6.52397	Set 1	8.46689	96.3442	cat_term:global_finito flag_for_volker no staining	no staining	no staining	no staining	no staining	no staining vent sensory complex PR
Epicuticle	CG31626	CG31626	1122	2744	9509.83	88.5278	Set 1	6.73094	88.9518	NA	list_4-6:no staining no staining	no staining	no staining	no staining	cat_term:global_finito dors epidermis esophagus foregut head epidermis vent epidermis
Epicuticle	TwdlQ	CG14250	115	62	1188.01	2.26178	Set 1	8.50867	86.9206	no staining	no staining	no staining	no staining	no staining	dors epidermis head epidermis oenocyte vent epidermis
Epicuticle	CG11584	CG11584	492	1089	4172.35	37.8785	Set 1	6.74574	81.131	no staining	no staining	no staining	no staining	NA	cat_term:global_finito tracheal sys vent epidermis
Epicuticle	TwdlF	CG14639	2284	13871	19090	520.623	Set 1	5.19366	73.857	cat_term:global_finito	list_4-6:no staining no staining	list_7-8:no staining no staining	no staining	no staining	dors epidermis head epidermis vent epidermis
Epicuticle	CG15740	CG15740	750	3007	6221.49	110.579	Set 1	5.80112	73.1131	cat_term:global_finito no staining	no staining	no staining	no staining	no staining	no staining
Epicuticle	zye	CG5847	188	417	1786.7	16.4478	Set 1	6.67811	72.1495	NA	NA	NA	NA	NA	NA
Epicuticle	TwdlH	CG31080	83	133	801.192	2.06264	Set 1	8.03123	77.4837	NA	NA	NA	NA	NA	NA
Epicuticle	CG15731	CG15731	947	5358	7943.26	184.304	Set 1	5.42177	70.2428	cat_term:finito1-3 cat_term:global_finito maternal	cat_term:finito4-6 list_4-6:ubiquitous ubiquitous	ant endoderm A cat_term:finito7-8 head mesoderm PR list_7-8:ubiquitous post endoderm PR trunk mesoderm PR ubiquitous	cat_term:finito9-10 faint ubiquitous ubiquitous	cat_term:finito11-12 faint ubiquitous	cat_term:finito13-16 dors epidermis faint ubiquitous head epidermis vent epidermis
Epicuticle	TwdlS	CG14242	30	7	347.278	0.0887048	Set 1	8.31733	70.2323	NA	NA	NA	NA	NA	NA
Epicuticle	CG7299	CG7299	450	2849	3649.12	68.8155	Set 1	5.70786	67.5452	cat_term:global_finito	list_4-6:no staining no staining	list_7-8:no staining no staining	no staining	amnioserosa yolk nuclei	amnioserosa dors epidermis epipharynx fat body rectum yolk nuclei
Epicuticle	CG30471	CG30471	38	23	327.284	0.849549	Set 1	7.46723	62.4171	NA	NA	NA	NA	NA	NA
Epicuticle	TwdlW	CG4060	318	1984	2848.52	70.6987	Set 1	5.31212	60.9646	cat_term:global_finito maternal	list_4-6:no staining no staining	list_7-8:no staining no staining	no staining	no staining	dors epidermis head epidermis muscle sys vent epidermis
Epicuticle	Cpr67Fa1	CG7941	56	134	659.6	4.71568	Set 1	6.85052	64.1732	cat_term:finito1-3 cat_term:global_finito no staining	cat_term:finito4-6 list_4-6:no staining no staining	cat_term:finito7-8 list_7-8:no staining no staining	cat_term:finito9-10 no staining	cat_term:finito11-12 no staining	cat_term:finito13-16 dors epidermis head epidermis vent epidermis
Epicuticle	CG2962	CG2962	2357	29802	20682.2	1088	Set 1	4.24731	60.8902	NA	list_4-6:no staining no staining	no staining	cat_term:finito9-10 no staining	no staining	cat_term:global_finito dors epidermis vent epidermis
Peripheral_nervous_system	pHCl-1	CG44099	1102	1145	4424.12	51.845	Set 1	6.38748	77.362	NA	NA	NA	NA	NA	NA
Peripheral_nervous_system	para	CG9907	2135	4983	8022.93	203.665	Set 1	5.29279	68.648	NA	NA	NA	NA	NA	NA
Peripheral_nervous_system	Gfrl	CG43224	633	1032	2592.65	44.2211	Set 1	5.84129	66.2447	cat_term:global_finito flag_for_volker no staining	no staining	no staining	no staining	labial sensory complex PR maxillary sensory complex PR no staining	labial sensory complex maxillary sensory complex no staining
Peripheral_nervous_system	Tsp47F	CG9033	126	87	501.05	3.5251	Set 1	6.79086	60.9255	NA	NA	NA	NA	NA	NA
Peripheral_nervous_system	DCX-EMAP	CG42247	117	74	471.728	2.69306	Set 1	6.99699	62.1674	cat_term:global_finito maternal	list_4-6:no staining no staining	no staining	no staining	no staining	antennal sense organ head epidermis labial sensory complex labral sensory complex maxillary sensory complex no staining sensory nervous sys PR sensory sys head vent sensory complex PR
Peripheral_nervous_system	CG42534	CG42534	103	58	400.779	2.04897	Set 1	7.03834	60.8835	NA	NA	NA	NA	NA	NA
Peripheral_nervous_system	eys	CG33955	387	1255	1566.06	56.2781	Set 1	4.77301	50.6599	NA	list_4-6:no staining	NA	NA	NA	cat_term:global_finito sensory sys head
Peripheral_nervous_system	CG34342	CG34342	53	69	234.565	3.46327	Set 1	5.71574	45.0399	NA	NA	NA	NA	NA	NA
Peripheral_nervous_system	Kif19A	CG9913	101	151	422.43	7.31035	Set 1	5.66766	49.4559	NA	NA	NA	NA	NA	NA
Peripheral_nervous_system	Ir76b	CG7385	60	37	235.147	1.44695	Set 1	6.58643	51.9244	NA	NA	NA	NA	NA	NA
Peripheral_nervous_system	sosie	CG13636	85	136	319.172	3.26613	Set 1	6.22526	51.811	cat_term:global_finito	list_4-6:no staining no staining	no staining	no staining	no staining	sensory nervous sys PR sensory sys head vent sensory complex PR
Peripheral_nervous_system	CG32006	CG32006	56	45	227.371	1.76507	Set 1	6.36159	49.8445	cat_term:global_finito no staining	no staining	no staining	no staining	no staining	dors/lateral sensory complexes no staining sensory sys head vent sensory complex PR
Peripheral_nervous_system	Ir25a	CG15627	98	191	380.705	8.21986	Set 1	5.36779	46.0358	flag_for_volker no staining	no staining	no staining	no staining	labral sensory complex PR	dors/lateral sensory complexes labral sensory complex sensory sys head
Peripheral_nervous_system	CG15803	CG15803	135	297	507.262	12.1654	Set 1	5.26791	47.3555	NA	NA	NA	NA	NA	NA
Peripheral_nervous_system	CG10804	CG10804	115	307	475.776	13.6481	Set 1	5.0215	44.6771	cat_term:global_finito no staining	no staining	no staining	no staining	no staining	brain central nervous sys no staining sensory sys head vent nerve cord
Peripheral_nervous_system	Cbp53E	CG6702	125	359	517.493	13.9352	Set 1	5.11475	46.1258	cat_term:global_finito	list_4-6:no staining no staining	list_7-8:no staining no staining	no staining	no staining	brain central nervous sys midgut sensory sys head vent nerve cord
Peripheral_nervous_system	meru	CG32150	335	1800	1464.74	77.3699	Set 1	4.2242	44.4277	no staining	no staining	no staining	no staining	no staining	no staining
Peripheral_nervous_system	CG42541	CG42541	311	1412	1244.68	61.5392	Set 1	4.31487	44.3686	cat_term:global_finito no staining	no staining	no staining	no staining	no staining	no staining
Peripheral_nervous_system	dysc	CG43749	630	3512	2402.74	150.772	Set 1	3.9847	44.7524	cat_term:global_finito no staining	no staining	no staining	no staining	no staining	no staining
Peripheral_nervous_system	CG30271	CG30271	32	19	118.769	0.705146	Set 1	6.12212	42.2678	NA	list_4-6:no staining	list_7-8:no staining	NA	NA	cat_term:global_finito labral sensory complex sensory sys head
Fat_body	fon	CG15825	3726	594	1561.29	20.9954	Set 1	6.1494	65.2417	cat_term:global_finito	list_4-6:no staining no staining	no staining	no staining	no staining	fat body
Fat_body	CG2233	CG2233	2120	315	825.257	12.1098	Set 1	5.97612	57.9113	cat_term:global_finito	list_4-6:no staining no staining	list_7-8:no staining no staining	no staining	no staining	fat body
Fat_body	CG2736	CG2736	1634	301	787.378	11.8855	Set 1	5.93323	57.094	cat_term:global_finito no staining	no staining	no staining	no staining	no staining	fat body
Fat_body	apolpp	CG11064	64502	67793	30677.2	2232.13	Set 1	3.78003	56.341	no staining	list_4-6:no staining no staining	list_7-8:no staining no staining	cat_term:finito9-10 no staining	amnioserosa yolk nuclei	cat_term:global_finito fat body yolk nuclei
Fat_body	NimB2	CG31839	3070	1014	1473.05	36.8147	Set 1	5.28371	55.614	no staining	no staining	no staining	no staining	no staining	fat body
Fat_body	Glt	CG9280	6272	3005	3097.15	125.484	Set 1	4.61391	53.5084	cat_term:global_finito	list_4-6:no staining no staining	no staining	no staining	no staining	fat body plasmatocytes
Fat_body	CG7227	CG7227	4033	1783	2039.98	76.3241	Set 1	4.72149	51.913	cat_term:global_finito	list_4-6:no staining no staining	list_7-8:no staining no staining	no staining	ant midgut PR fat body SA post midgut PR	fat body lymph gland midgut midgut chamber
Fat_body	Idgf2	CG4475	3089	1317	1558.02	50.5908	Set 1	4.91646	52.1461	cat_term:global_finito maternal	faint ubiquitous list_4-6:ubiquitous maternal	faint ubiquitous head mesoderm PR list_7-8:specific trunk mesoderm PR	faint ubiquitous head mesoderm PR trunk mesoderm PR	no staining	fat body lymph gland yolk nuclei
Fat_body	CG8160	CG8160	801	171	323.819	6.7652	Set 1	5.38202	44.9049	maternal	faint ubiquitous list_4-6:ubiquitous ubiquitous	faint ubiquitous list_7-8:ubiquitous ubiquitous	faint ubiquitous ubiquitous	faint ubiquitous ubiquitous	cat_term:global_finito faint ubiquitous fat body ubiquitous
Fat_body	Gbp2	CG11395	1151	442	571.545	16.9788	Set 1	4.9905	45.7192	no staining	list_4-6:no staining no staining	list_7-8:no staining no staining	amnioserosa cat_term:finito9-10 no staining	yolk nuclei	cat_term:global_finito fat body yolk nuclei
Fat_body	Cpr49Ac	CG8502	754	174	325.22	7.24239	Set 1	5.30221	44.2718	cat_term:finito1-3 cat_term:global_finito	cat_term:finito4-6 dors ectoderm A list_4-6:specific pair rule subset trunk mesoderm AISN vent ectoderm A	cat_term:finito7-8 list_7-8:no staining no staining	cat_term:finito9-10 no staining	atrium PR cat_term:finito11-12 cat_term:global_finito gnathal PR	atrium cat_term:finito13-16 cat_term:global_finito fat body foregut sensory structure
Fat_body	Idgf4	CG1780	6699	6488	3271.86	234.471	Set 1	3.79649	44.3291	cat_term:global_finito maternal	apically cleared cellular blastoderm list_4-6:ubiquitous strong ubiquitous	ant endoderm A head mesoderm PR list_7-8:ubiquitous pole cell post endoderm PR procephalic ectoderm A strong ubiquitous trunk mesoderm PR ubiquitous	ant endoderm PR germ cell head mesoderm PR post endoderm PR trunk mesoderm PR	amnioserosa germ cell yolk nuclei	amnioserosa anal pad fat body head epidermis stomatogastric nervous sys yolk nuclei
Fat_body	Apoltp	CG15828	3568	2742	1741.22	97.5245	Set 1	4.14347	44.6115	cat_term:global_finito	list_4-6:no staining no staining	no staining	no staining	fat body/gonad PR yolk nuclei	amnioserosa fat body yolk nuclei
Fat_body	fat-spondin	CG6953	3513	2367	1761.45	103.806	Set 1	4.07097	43.8987	cat_term:global_finito no staining	list_4-6:no staining no staining	no staining	no staining	fat body/gonad PR plasmatocytes A yolk nuclei	fat body plasmatocytes yolk nuclei
Fat_body	CG3246	CG3246	2458	1787	1225.24	71.9927	Set 1	4.06917	41.7499	cat_term:global_finito maternal	faint ubiquitous	faint ubiquitous list_7-8:no staining	amnioserosa faint ubiquitous	yolk nuclei	fat body yolk nuclei
Fat_body	CG9932	CG9932	7253	8142	3648.59	322.544	Set 1	3.4953	41.3617	maternal	faint ubiquitous	no staining	no staining	yolk nuclei	fat body yolk nuclei
Fat_body	Tep4	CG10363	3139	2615	1599.32	106.314	Set 1	3.89754	41.486	no staining	list_4-6:no staining no staining	ant endoderm A list_7-8:specific	ant endoderm PR post endoderm PR	amnioserosa ant midgut PR fat body/gonad PR post midgut PR	cat_term:global_finito fat body lymph gland midgut
Garland_cell_nephrocyte	CG42255	CG42255	700	167	3557.99	6.10229	Set 1	8.96856	105.804	cat_term:global_finito	list_4-6:no staining no staining	no staining	no staining	garland cell PR	garland cell
Garland_cell_nephrocyte	Amnionless	CG11592	520	201	2664.33	6.72979	Set 1	8.42913	95.9243	no staining	no staining	no staining	no staining	circular visceral mesoderm PR garland cell PR	circular visceral muscle fibers garland cell
Garland_cell_nephrocyte	CG15209	CG15209	83	258	448.646	11.0016	Set 1	5.22428	46.0397	cat_term:global_finito	list_4-6:no staining no staining	no staining	no staining	no staining	garland cell pericardial cell
Garland_cell_nephrocyte	Tsp42El	CG12840	47	488	249.039	19.5243	Set 1	3.60097	28.6853	cat_term:global_finito	list_4-6:no staining no staining	no staining	no staining	no staining	dors vessel esophagus garland cell head epidermis
Garland_cell_nephrocyte	CG1827	CG1827	23	181	134.947	7.07788	Set 1	4.06227	28.7889	cat_term:global_finito	list_4-6:no staining no staining	no staining	no staining	no staining	garland cell
Garland_cell_nephrocyte	beta4GalNAcTA	CG8536	26	191	132.48	8.07732	Set 1	3.86736	27.3054	cat_term:global_finito maternal no staining	list_4-6:no staining no staining	no staining	no staining	no staining	garland cell no staining
Garland_cell_nephrocyte	Cp1	CG6692	258	6421	1303.22	272.261	Set 1	2.25373	23.3238	flag_for_volker no staining ubiquitous	no staining ubiquitous	no staining ubiquitous vent nerve cord A	central brain PR P3 no staining ubiquitous vent nerve cord PR P3	brain PR garland cell PR no staining ubiquitous vent sensory complex SA	apoptotic amnioserosa brain garland cell no staining ubiquitous vent nerve cord
Garland_cell_nephrocyte	scf	CG9148	353	8967	1798.71	407.869	Set 1	2.13726	23.1113	cat_term:global_finito maternal	cellular blastoderm list_4-6:ubiquitous yolk nuclei	head mesoderm PR list_7-8:specific trunk mesoderm PR yolk nuclei	crystal cell SA head mesoderm PR plasmatocytes PR trunk mesoderm PR yolk nuclei	fat body/gonad PR garland cell PR plasmatocytes A procrystal cell trunk mesoderm PR visceral muscle PR yolk nuclei	crystal cell fat body garland cell plasmatocytes yolk nuclei
Garland_cell_nephrocyte	Gp93	CG5520	527	14948	2591.63	652.665	Set 1	1.98724	22.5357	cat_term:global_finito maternal	list_4-6:ubiquitous strong ubiquitous ubiquitous	amnioserosa list_7-8:ubiquitous strong ubiquitous ubiquitous	amnioserosa strong ubiquitous ubiquitous	amnioserosa ubiquitous	amnioserosa dors epidermis garland cell proventriculus ubiquitous vent epidermis
Garland_cell_nephrocyte	FucTA	CG6869	26	462	154.444	20.2901	Set 1	2.85883	20.813	NA	list_4-6:no staining	NA	NA	NA	brain cat_term:global_finito central nervous sys garland cell vent nerve cord
Garland_cell_nephrocyte	CG10960	CG10960	142	3828	700.368	150.936	Set 1	2.20465	20.8428	cat_term:global_finito maternal	list_4-6:no staining no staining	list_7-8:no staining no staining	amnioserosa cat_term:finito9-10 clypeolabrum PR head mesoderm PR yolk nuclei	amnioserosa clypeo-labral PR garland cell PR salivary gland PR yolk nuclei	brain central brain glia garland cell lateral cord glia midgut salivary gland tracheal sys vent midline vent midline glia vent nerve cord
Garland_cell_nephrocyte	CG9953	CG9953	44	980	235.235	41.59	Set 1	2.46551	19.4383	cat_term:finito1-3 maternal	cat_term:finito4-6 faint ubiquitous list_4-6:specific ubiquitous	ant endoderm A cat_term:finito7-8 faint ubiquitous head mesoderm PR list_7-8:specific post endoderm PR trunk mesoderm PR ubiquitous	ant endoderm PR cat_term:finito9-10 faint ubiquitous head mesoderm PR post endoderm PR trunk mesoderm PR	cat_term:global_finito faint ubiquitous	cat_term:global_finito garland cell
Germ_cells_ovaries	dhd	CG4193	1459	607	1417.13	23.6294	Set 1	5.84645	61.211	cat_term:global_finito maternal	list_4-6:specific pole cell rapidly degraded	list_7-8:specific pole cell	no staining	no staining	germ cell no staining
Germ_cells_ovaries	alphaTub67C	CG8308	259	97	261.913	4.14295	Set 1	5.67035	45.5808	cat_term:finito1-3 cat_term:global_finito maternal	cat_term:finito4-6 cellular blastoderm list_4-6:ubiquitous ubiquitous	cat_term:finito7-8 ubiquitous	ant endoderm PR cat_term:finito9-10 head mesoderm PR post endoderm PR trunk mesoderm PR ubiquitous	ant midgut PR brain PR cat_term:finito11-12 head mesoderm PR post midgut PR somatic muscle PR trunk mesoderm PR ubiquitous vent nerve cord PR visceral muscle PR	cat_term:any_neural cat_term:finito13-16 cat_term:pan_CNS cat_term:true_ubiquitous dors prothoracic pharyngeal muscle midgut muscle sys somatic muscle ubiquitous visceral muscle
Germ_cells_ovaries	Pxt	CG7660	308	134	293.665	4.75294	Set 1	5.67373	46.5412	cat_term:global_finito maternal	list_4-6:specific pole cell rapidly degraded	list_7-8:specific pole cell	germ cell	no staining	no staining
Germ_cells_ovaries	yl	CG1372	289	196	284.924	6.8046	Set 1	5.19011	42.3486	cat_term:global_finito maternal no staining	maternal no staining	no staining	no staining	no staining	no staining
Germ_cells_ovaries	fs(1)Ya	CG2707	161	56	161.293	2.01445	Set 1	5.74165	42.1578	maternal	maternal no staining	no staining	no staining	no staining	no staining
Germ_cells_ovaries	Cyp6a19	CG10243	151	53	138.339	2.36942	Set 1	5.35957	38.1733	cat_term:global_finito maternal	no staining	no staining	no staining	no staining	no staining
Germ_cells_ovaries	mtrm	CG18543	250	240	246.202	9.45689	Set 1	4.55732	36.2286	cat_term:global_finito maternal	no staining	no staining	no staining	no staining	no staining
Germ_cells_ovaries	Jabba	CG42351	285	262	237.593	9.14387	Set 1	4.54981	35.9363	cat_term:global_finito maternal	maternal no staining	no staining	no staining	no staining	no staining
Germ_cells_ovaries	CG11674	CG11674	180	164	176.582	6.8056	Set 1	4.49969	33.6232	cat_term:global_finito maternal	maternal	no staining	no staining	no staining	no staining
Germ_cells_ovaries	CG7208	CG7208	109	35	107.56	1.44725	Set 1	5.45784	36.9078	maternal no staining	no staining pole cell rapidly degraded	no staining	no staining	no staining	no staining
Germ_cells_ovaries	exu	CG8994	265	236	244.584	8.17812	Set 1	4.73599	37.6041	cat_term:global_finito maternal pole plasm	list_4-6:specific pole cell rapidly degraded	list_7-8:specific pole cell	no staining	no staining	no staining
Germ_cells_ovaries	CG4991	CG4991	149	69	139.595	2.36078	Set 1	5.37631	38.3621	cat_term:global_finito maternal	maternal	no staining	no staining	no staining	no staining
Germ_cells_ovaries	wisp	CG15737	419	686	373.761	24.1497	Set 1	3.8935	33.2888	cat_term:finito1-3 maternal pole plasm	cat_term:finito4-6 list_4-6:specific pole cell ubiquitous	cat_term:finito7-8 pole cell	cat_term:finito9-10 germ cell	cat_term:global_finito no staining	cat_term:global_finito no staining
Germ_cells_ovaries	fs(1)M3	CG4790	86	43	85.6505	1.45388	Set 1	5.12533	32.9924	NA	NA	NA	NA	NA	NA
Germ_cells_ovaries	gammaTub37C	CG17566	72	38	82.321	1.65957	Set 1	4.95199	31.5967	cat_term:global_finito maternal	maternal	no staining	no staining	no staining	no staining
Germ_cells_ovaries	BigH1	CG3509	173	171	177.354	6.73791	Set 1	4.51855	33.7924	cat_term:global_finito maternal pole plasm	cellular blastoderm list_4-6:specific maternal pole plasm rapidly degraded subset	list_7-8:specific pole cell	germ cell	germ cell	germ cell muscle sys somatic muscle
Germ_cells_ovaries	CG4476	CG4476	75	53	87.4709	1.61795	Set 1	5.06229	32.7385	maternal pole plasm	list_4-6:specific maternal pole cell	list_7-8:specific pole cell	germ cell	pars intercerebralis PR stomatogastric nervous sys PR	cat_term:global_finito central brain pars intercerebralis germ cell ring gland stomatogastric nervous sys
Germ_cells_ovaries	zpg	CG10125	186	219	198.335	8.16665	Set 1	4.4354	33.8822	cat_term:global_finito maternal pole plasm	list_4-6:specific pole cell rapidly degraded	pole cell	germ cell	germ cell	germ cell
Germ_cells_ovaries	swa	CG3429	211	392	223.692	13.3163	Set 1	3.96578	30.9799	cat_term:global_finito maternal	maternal	no staining	no staining	no staining	no staining
Germ_cells_ovaries	vas	CG46283	140	136	142.673	5.32639	Set 1	4.49519	32.2154	cat_term:global_finito maternal	list_4-6:specific rapidly degraded subset	no staining	germ cell	germ cell	germ cell gonad
Glutamatergic	beat-Ia	CG4846	3387	2140	1893.29	93.926	Set 1	4.31795	47.0114	cat_term:global_finito no staining	no staining	no staining	no staining	no staining	no staining
Glutamatergic	CARPA	CG1402	1307	622	709.348	24.1461	Set 1	4.81808	45.6387	flag_for_volker no staining	no staining	no staining	no staining	vent nerve cord PR	dors/lateral sensory complexes stomatogastric nervous sys vent nerve cord
Glutamatergic	beat-VI	CG14064	1530	983	819.248	40.5702	Set 1	4.30068	41.6302	NA	NA	NA	NA	NA	NA
Glutamatergic	fred	CG31774	1526	1166	866.9	53.4499	Set 1	3.99286	38.9759	NA	NA	NA	NA	NA	NA
Glutamatergic	rhea	CG6831	8635	15552	4795.37	609.513	Set 1	2.97355	36.3597	cat_term:global_finito flag_for_volker maternal	cellular blastoderm list_4-6:ubiquitous maternal strong ubiquitous ubiquitous	list_7-8:ubiquitous strong ubiquitous ubiquitous	amnioserosa salivary gland body SA strong ubiquitous ubiquitous vent nerve cord PR P3	amnioserosa ant midgut PR brain PR foregut PR post midgut PR salivary gland body PR strong ubiquitous tracheal PR ubiquitous	amnioserosa brain cat_term:any_neural dors epidermis epipharynx fat body foregut head epidermis hindgut hypopharynx neuroblasts of vent nervous sys proventriculus salivary gland salivary gland body strong ubiquitous vent epidermis vent nerve cord
Glutamatergic	Shab	CG43128	3328	4079	1766.75	184.034	Set 1	3.25524	35.1165	cat_term:global_finito no staining	no staining	no staining	no staining	no staining	no staining
Glutamatergic	twit	CG9335	388	235	215.234	9.16406	Set 1	4.40436	34.1622	cat_term:global_finito	list_4-6:no staining no staining	no staining	no staining	no staining	Bolwig's organ brain central brain neuron central nervous sys lateral cord glia vent nerve cord
Glutamatergic	cac	CG43368	6026	10276	3227.4	465.392	Set 1	2.79076	32.5308	cat_term:global_finito	no staining	no staining	no staining	no staining	brain central brain glia central nervous sys lateral cord glia vent nerve cord
Glutamatergic	shakB	CG34358	4824	8462	2545.37	370.296	Set 1	2.77724	31.4223	cat_term:global_finito no staining	no staining	no staining	no staining	no staining	no staining
Glutamatergic	Ptp99A	CG11516	4500	9153	2479.47	401.163	Set 1	2.62418	29.5913	NA	NA	NA	NA	NA	NA
Glutamatergic	X11Lbeta	CG32677	3674	7718	2044.79	335.453	Set 1	2.60348	28.6342	NA	NA	NA	NA	NA	NA
Glutamatergic	CG11319	CG11319	577	561	310.228	23.4594	Set 1	3.66487	30.3518	NA	NA	NA	NA	NA	NA
Glutamatergic	CG34370	CG34370	832	990	453.323	43.8551	Set 1	3.3372	29.4594	cat_term:global_finito no staining	list_4-6:no staining no staining	list_7-8:no staining no staining	no staining yolk nuclei	no staining yolk nuclei	amnioserosa brain no staining vent nerve cord
Glutamatergic	CG43689	CG43689	898	1345	495.341	58.2758	Set 1	3.06291	27.4289	no staining	no staining	no staining	no staining	no staining	no staining
Glutamatergic	Nckx30C	CG18660	2691	5005	1418.86	213.204	Set 1	2.72767	28.5629	no staining	list_4-6:no staining no staining	list_7-8:no staining no staining	no staining	no staining	NA
Glutamatergic	Rbp6	CG32169	5644	12990	3047.11	530.277	Set 1	2.51991	29.1647	cat_term:global_finito	list_4-6:no staining no staining	no staining	cat_term:finito9-10 no staining	no staining	brain central brain neuron central nervous sys corpus allatum dors prothoracic pharyngeal muscle lateral cord neuron ring gland vent nerve cord
Glutamatergic	para	CG9907	2574	4970	1355.27	194.5	Set 1	2.79334	29.0659	NA	NA	NA	NA	NA	NA
Glutamatergic	mmd	CG42252	1859	2869	979.487	123.61	Set 1	2.97461	29.5598	no staining	list_4-6:specific no staining	list_7-8:no staining no staining	no staining	no staining	brain cat_term:global_finito head epidermis dors vent nerve cord
Glutamatergic	Syt1	CG3139	2994	5704	1580.43	250.803	Set 1	2.64995	28.1611	cat_term:global_finito	list_4-6:no staining no staining	list_7-8:no staining no staining	no staining	no staining	brain cat_term:global_finito central nervous sys vent nerve cord
Glutamatergic	Cow	CG13830	1267	2196	674.916	93.7916	Set 1	2.83188	26.6216	no staining	no staining	no staining	no staining	no staining	vent nerve cord
Procuticle	CG5070	CG5070	104	107	170.035	4.33666	Set 1	4.99375	37.0444	no staining	no staining	no staining	no staining	no staining	no staining
Procuticle	CG7548	CG7548	114	114	196.144	4.66086	Set 1	5.11475	38.9903	NA	NA	NA	NA	NA	NA
Procuticle	Ccp84Ac	CG1327	524	1088	878.79	41.522	Set 1	4.36924	42.7356	no staining	no staining	no staining	no staining	no staining	no staining
Procuticle	Cpr97Ea	CG6131	103	123	166.684	3.84955	Set 1	5.10312	37.7101	cat_term:finito1-3 cat_term:global_finito	cat_term:finito4-6 list_4-6:no staining no staining	cat_term:finito7-8 list_7-8:no staining no staining	cat_term:finito9-10 no staining	cat_term:finito11-12 no staining	atrium cat_term:finito13-16 head epidermis dors
Procuticle	Cpr56F	CG9036	365	866	594.483	30.7424	Set 1	4.22715	38.9655	cat_term:global_finito maternal	faint ubiquitous list_4-6:ubiquitous	faint ubiquitous list_7-8:ubiquitous	faint ubiquitous	NA	atrium epipharynx foregut hypopharynx post spiracle
Procuticle	CG9269	CG9269	82	97	130.233	3.62581	Set 1	4.81525	33.88	NA	NA	NA	NA	NA	NA
Procuticle	Cpr92F	CG5494	134	163	233.623	6.02525	Set 1	5.05549	39.8079	cat_term:global_finito no staining	no staining	no staining	no staining	no staining	no staining
Procuticle	CG7179	CG7179	134	173	203.777	6.84385	Set 1	4.69928	36.0807	cat_term:global_finito	list_4-6:no staining no staining	list_7-8:no staining no staining	cat_term:finito9-10 no staining	cat_term:finito11-12 no staining	adult hindgut precursor anal pad cat_term:finito13-16 hindgut large intestine proventriculus salivary gland common duct salivary gland duct vent epidermis
Procuticle	TwdlC	CG14254	364	993	561.694	40.0782	Set 1	3.77334	34.474	no staining	list_4-6:no staining no staining	no staining	cat_term:finito9-10 no staining	no staining	cat_term:global_finito epipharynx foregut hypopharynx no staining
Procuticle	Ccp84Ab	CG1252	74	153	131.428	3.89379	Set 1	4.74718	33.4631	no staining	no staining	no staining	no staining	no staining	cat_term:global_finito tracheal sys
Procuticle	CG34461	CG34461	377	1256	636.714	45.1043	Set 1	3.78767	35.2889	flag_for_volker maternal	maternal rapidly degraded	no staining	no staining	no staining	dors epidermis tracheal sys
Procuticle	Ccp84Aa	CG2360	34	27	59.7702	0.803576	Set 1	5.05049	29.9257	cat_term:finito1-3 cat_term:global_finito maternal	cat_term:finito4-6 faint ubiquitous list_4-6:no staining list_4-6:ubiquitous	cat_term:finito7-8 faint ubiquitous list_7-8:ubiquitous	cat_term:finito9-10 faint ubiquitous	cat_term:finito11-12 faint ubiquitous	cat_term:finito13-16 head epidermis midgut
Procuticle	Cpr62Bc	CG1919	270	908	419.862	34.6999	Set 1	3.55592	30.9977	cat_term:global_finito	list_4-6:no staining no staining	list_7-8:no staining no staining	cat_term:finito9-10 no staining	no staining	atrium dors epidermis epipharynx foregut head epidermis head epidermis dors hypopharynx post spiracle tracheal sys vent epidermis
Procuticle	Muc91C	CG7709	515	2716	859.157	108.871	Set 1	2.96711	28.9247	NA	NA	NA	NA	NA	NA
Procuticle	CG13041	CG13041	102	141	148.921	5.52909	Set 1	4.51152	32.6096	NA	NA	NA	NA	NA	NA
Procuticle	CG13043	CG13043	131	389	210.091	13.4441	Set 1	3.86246	29.8249	no staining	list_4-6:no staining no staining	no staining	cat_term:finito9-10 no staining	no staining	antennal sense organ cat_term:global_finito head epidermis labral sensory complex sensory sys head
Procuticle	CG12523	CG12523	172	517	278.757	21.6513	Set 1	3.62134	29.4344	cat_term:global_finito maternal no staining	no staining	no staining	no staining	no staining	no staining
Procuticle	CG13059	CG13059	160	535	242.051	20.2173	Set 1	3.512	27.833	NA	NA	NA	NA	NA	NA
Procuticle	Ccp84Ad	CG2341	108	346	177.252	12.492	Set 1	3.71563	27.7846	NA	NA	NA	NA	NA	NA
Procuticle	Cpr23B	CG2973	52	96	93.3117	4.15884	Set 1	4.17694	27.3981	cat_term:global_finito	no staining	list_7-8:no staining no staining	cat_term:finito9-10 no staining	no staining	hypopharynx proventriculus
Longitudinal_visceral_muscle	tey	CG8780	1240	1790	5925.2	76.269	Set 1	6.26083	78.4663	cat_term:global_finito	no staining	list_7-8:no staining no staining	cat_term:finito9-10 no staining	cat_term:finito11-12 longitudinal visceral mesoderm PR visceral muscle PR	brain cat_term:finito13-16 central brain glia central nervous sys circular visceral muscle fibers lateral cord glia longitudinal visceral muscle fibers vent nerve cord
Longitudinal_visceral_muscle	AdamTS-A	CG14869	1072	3550	5160.69	159.046	Set 1	5.01101	61.8039	cat_term:global_finito no staining	no staining	no staining	no staining	no staining	no staining
Longitudinal_visceral_muscle	beat-IIb	CG4135	784	2282	3738.91	105.28	Set 1	5.13668	60.9661	NA	NA	NA	NA	NA	NA
Longitudinal_visceral_muscle	Syn2	CG4905	189	440	932.718	18.4289	Set 1	5.58517	55.108	cat_term:global_finito no staining	no staining	no staining	no staining	longitudinal visceral mesoderm PR no staining	dors prothoracic pharyngeal muscle longitudinal visceral muscle fibers no staining vent epidermis visceral muscle
Longitudinal_visceral_muscle	CG15186	CG15186	211	568	988.692	24.3729	Set 1	5.28416	52.5818	NA	NA	NA	NA	NA	NA
Longitudinal_visceral_muscle	HLH54F	CG5005	123	360	606.504	14.7731	Set 1	5.26498	48.6839	faint ubiquitous list_1-3 maternal	ant list_4-6 list_4-6:specific mesoderm AISN post segmentally repeated trunk mesoderm A trunk mesoderm AISN	list_7-8 list_7-8:specific post trunk mesoderm PR	list_9-10 list_9-10:specific trunk mesoderm PR	dors pharyngeal muscle PR list_11-12 longitudinal visceral mesoderm PR segmentally repeated trunk mesoderm PR	dors prothoracic pharyngeal muscle list_13-16 longitudinal visceral muscle fibers ring gland
Longitudinal_visceral_muscle	OtopLa	CG42492	1124	7632	5251.57	342.861	Set 1	3.93285	48.6053	cat_term:global_finito no staining	no staining	no staining	no staining	no staining	no staining
Longitudinal_visceral_muscle	Shaw	CG2822	231	927	1114.49	40.3673	Set 1	4.75175	48.1041	cat_term:global_finito no staining	no staining	no staining	no staining	no staining	no staining
Longitudinal_visceral_muscle	pyx	CG17142	89	268	412.063	11.3189	Set 1	5.06392	44.0066	no staining	no staining	no staining	no staining	no staining	no staining
Longitudinal_visceral_muscle	beat-IIa	CG14334	284	1543	1324.6	69.595	Set 1	4.22984	43.8737	cat_term:global_finito	list_4-6:no staining no staining	no staining	no staining	longitudinal visceral mesoderm PR stomatogastric nervous sys PR visceral muscle PR	brain leading edge cell longitudinal visceral muscle fibers sensory nervous sys PR stomatogastric nervous sys
Longitudinal_visceral_muscle	trol	CG33950	3687	44898	17645.2	2138.13	Set 1	3.04418	42.9445	cat_term:global_finito no staining	list_4-6:no staining no staining	list_7-8:no staining no staining	no staining	germ cell no staining	circulatory sys dors epidermis dors vessel epipharynx foregut sensory structure hypopharynx lateral cord lateral cord glia lymph gland midgut muscle sys no staining proventriculus proventriculus inner layer proventriculus intermediate layer proventriculus outer layer ring gland somatic muscle vent midline vent nerve cord
Longitudinal_visceral_muscle	CG30116	CG30116	198	956	915.827	40.5987	Set 1	4.46046	43.8932	cat_term:global_finito	list_4-6:no staining no staining	no staining	cat_term:finito9-10 no staining	no staining	brain central brain central brain glia central brain neuron central brain pars intercerebralis central nervous sys gastric caecum hindgut lateral cord neuron midgut midgut chamber proventriculus sensory nervous sys PR sensory sys head vent midline vent midline glia vent midline neuron vent nerve cord vent sensory complex PR
Longitudinal_visceral_muscle	H2.0	CG11607	118	554	559.524	22.7854	Set 1	4.55605	41.5996	cat_term:global_finito maternal no staining	list_4-6:no staining no staining ubiquitous	list_7-8:no staining no staining	no staining	circular visceral mesoderm PR dors epidermis PR visceral muscle PR	dors epidermis muscle sys vent epidermis visceral muscle
Longitudinal_visceral_muscle	disco-r	CG32577	730	7326	3444.8	332.28	Set 1	3.36961	39.5951	maternal	maternal no staining	no staining	clypeolabrum PR	atrium PR clypeo-labral PR segmentally repeated vent epidermis PR	atrium circular visceral muscle fibers clypeolabrum
Longitudinal_visceral_muscle	org-1	CG11202	185	1145	854.14	51.5657	Set 1	4.02228	39.1771	cat_term:global_finito no staining	list_4-6:no staining no staining	no staining	trunk mesoderm PR	visceral muscle PR	somatic muscle visceral muscle
Longitudinal_visceral_muscle	sals	CG31374	257	2373	1195.53	102.309	Set 1	3.53261	36.1197	flag_for_volker maternal no staining	faint ubiquitous no staining	faint ubiquitous no staining	faint ubiquitous no staining	faint ubiquitous no staining trunk mesoderm PR	dors prothoracic pharyngeal muscle garland cell muscle sys somatic muscle
Longitudinal_visceral_muscle	CG44422	CG44422	344	3677	1569.51	167	Set 1	3.22379	34.227	NA	NA	NA	NA	NA	NA
Longitudinal_visceral_muscle	sqa	CG42347	158	1500	748.032	64.4072	Set 1	3.51558	33.5699	NA	list_4-6:no staining no staining	no staining	no staining	NA	cat_term:global_finito muscle sys somatic muscle
Longitudinal_visceral_muscle	CG13506	CG13506	268	3113	1301.75	140.729	Set 1	3.19925	33.1038	no staining	list_4-6:no staining no staining	no staining	cat_term:finito9-10 no staining	no staining	atrium cat_term:global_finito epipharynx foregut gastric caecum hindgut hypopharynx longitudinal visceral muscle fibers midgut muscle sys post spiracle proventriculus salivary gland
Longitudinal_visceral_muscle	zormin	CG33484	432	6096	2059.87	251.913	Set 1	3.02584	33.3116	NA	NA	NA	NA	NA	NA
Malpighian tubule	Muc11A	CG32656	4341	32	1880.07	1.32476	Set 1	9.65949	105.069	cat_term:global_finito no staining	no staining	no staining	no staining	no staining	epipharynx head epidermis hypopharynx imaginal tracheal precursor tracheal sys
Malpighian tubule	Mur18B	CG7874	2992	57	1467.14	1.78128	Set 1	9.04304	95.1308	cat_term:global_finito	no staining	no staining	no staining	no staining	Malpighian tubule post spiracle
Malpighian tubule	Alp8	CG3264	4089	27	1325.38	0.947503	Set 1	9.41056	97.6184	cat_term:global_finito no staining	no staining	no staining	no staining	no staining	no staining
Malpighian tubule	CG14292	CG14292	2895	74	1368.79	2.9836	Set 1	8.42461	87.7823	no staining	no staining	no staining	no staining	no staining	no staining
Malpighian tubule	Alp7	CG3292	1800	27	644.149	0.668194	Set 1	8.59296	80.2023	no staining	no staining	no staining	no staining	no staining	no staining
Malpighian tubule	Fst	CG9434	4366	412	1700.9	13.1611	Set 1	6.90822	74.1455	flag_for_volker no staining	no staining	no staining	no staining	hindgut proper PR Malpighian tubule PR	Malpighian tubule
Malpighian tubule	Alp4	CG1462	1112	32	504.502	1.45691	Set 1	7.68187	68.9953	maternal	NA	NA	NA	NA	NA
Malpighian tubule	ZnT35C	CG3994	1289	592	1943.82	22.3437	Set 1	6.37972	69.7011	cat_term:global_finito maternal	list_4-6:no staining no staining rapidly degraded ubiquitous	list_7-8:no staining no staining	no staining	Malpighian tubule PR yolk nuclei	dors/lateral sensory complexes main segment of Malpighian tubule Malpighian tubule sensory nervous sys PR
Malpighian tubule	CG6337	CG6337	1385	358	1178.72	11.7396	Set 1	6.53176	66.6515	cat_term:global_finito	list_4-6:no staining no staining	no staining	no staining	no staining	hindgut main segment of Malpighian tubule Malpighian tubule
Malpighian tubule	CG14963	CG14963	840	7	377.681	0.333614	Set 1	8.14568	69.7665	cat_term:global_finito no staining	no staining	no staining	no staining	no staining	no staining
Malpighian tubule	CG34426	CG34426	870	11	360.992	0.525568	Set 1	7.88647	67.0336	NA	NA	NA	NA	NA	NA
Malpighian tubule	CG42235	CG42235	1028	63	527.741	2.94605	Set 1	7.06328	63.8974	cat_term:global_finito maternal no staining	no staining ubiquitous	no staining ubiquitous	no staining ubiquitous	no staining ubiquitous	no staining ubiquitous
Malpighian tubule	salt	CG2196	956	26	442.377	1.34072	Set 1	7.56218	66.4896	NA	NA	NA	NA	NA	NA
Malpighian tubule	w	CG2759	861	440	1122.17	16.8869	Set 1	5.97125	60.5089	cat_term:global_finito	AISN dors ectoderm AISN gap list_4-6:specific subset	list_7-8:specific pair_rule trunk mesoderm PR	amnioserosa PR clypeolabrum PR foregut PR gnathal lobes A procephalic ectoderm PR trunk mesoderm PR	atrium PR brain PR clypeo-labral PR foregut PR head epidermis PR P1 hindgut proper PR hypopharynx PR P1 midline PR optic lobe PR procephalon PR vent epidermis PR vent nerve cord PR	apoptotic amnioserosa atrium brain cat_term:any_neural cat_term:subset_CNS circular visceral muscle fibers clypeolabrum dors vessel foregut head epidermis hindgut hypopharynx midgut vent epidermis vent midline vent midline glia vent nerve cord
Malpighian tubule	CG33281	CG33281	586	34	310.227	1.25727	Set 1	7.1026	58.8225	NA	list_4-6:no staining no staining	no staining	no staining	no staining	cat_term:global_finito main segment of Malpighian tubule Malpighian tubule
Malpighian tubule	CG3690	CG3690	613	13	265.208	0.419587	Set 1	7.54551	60.7897	no staining	no staining	no staining	no staining	no staining	no staining
Malpighian tubule	CG31272	CG31272	1074	323	907.457	11.8629	Set 1	6.14054	60.3447	no staining	list_4-6:no staining no staining	list_7-8:no staining no staining	no staining	Malpighian tubule PR	cat_term:global_finito Malpighian tubule
Malpighian tubule	CG16762	CG16762	430	5	244.739	0.126721	Set 1	7.76297	61.6456	cat_term:global_finito no staining	no staining	no staining	no staining	no staining	no staining
Malpighian tubule	CG3168	CG3168	4327	1600	2021.78	55.2183	Set 1	5.16845	56.7605	cat_term:global_finito	list_4-6:no staining no staining	no staining	amnioserosa no staining	no staining yolk nuclei	amnioserosa brain central brain glia central brain surface glia central nervous sys hindgut lateral cord glia Malpighian tubule Malpighian tubule tip cell vent midline vent nerve cord yolk nuclei
Maxillary_sensory_complex	CG7300	CG7300	620	500	3471.22	18.6037	Set 1	7.46817	87.838	cat_term:global_finito	list_4-6:no staining no staining	list_7-8:no staining no staining	no staining	no staining	maxillary sensory complex
Maxillary_sensory_complex	twz	CG10440	249	555	1356.15	23.4893	Set 1	5.79122	60.2656	cat_term:global_finito	list_4-6:no staining no staining	list_7-8:no staining no staining	cat_term:finito9-10 no staining	brain PR gnathal PR inner optic lobe PR maxillary sensory complex PR vent epidermis PR	atrium brain central brain glia central brain neuron central nervous sys head epidermis lateral cord glia lateral cord neuron maxillary sensory complex sensory sys head vent nerve cord
Maxillary_sensory_complex	CG17108	CG17108	40	30	254.623	1.40951	Set 1	6.72347	53.7735	cat_term:global_finito maternal	no staining	no staining	no staining	no staining	no staining
Maxillary_sensory_complex	Dfd	CG2189	225	576	1193.87	22.9328	Set 1	5.64051	57.6609	flag_for_volker	dors ectoderm A dors ectoderm AISN gap list_4-6:specific trunk mesoderm AISN vent ectoderm A vent ectoderm AISN	dors ectoderm PR trunk mesoderm PR vent ectoderm PR	dors ectoderm PR dors ridge A gnathal lobes A trunk mesoderm PR vent epidermis PR	atrium PR dors ridge PR P1 maxillary sensory complex PR vent epidermis PR vent nerve cord PR	atrium dors ridge maxillary sensory complex vent epidermis vent nerve cord
Maxillary_sensory_complex	CG13362	CG13362	583	3562	3264.59	156.653	Set 1	4.37208	51.0358	cat_term:global_finito no staining	list_4-6:no staining no staining	list_7-8:no staining no staining	no staining	no staining	anal pad atrium head epidermis labial sensory complex no staining sensory sys head
Maxillary_sensory_complex	TfAP-2	CG7807	119	336	640.371	13.4949	Set 1	5.46529	50.9639	cat_term:global_finito maternal	list_4-6:specific no staining	list_7-8:ubiquitous no staining	procephalic ectoderm PR	brain PR central brain maxillary sensory complex PR vent nerve cord PR	brain cat_term:any_neural cat_term:subset_CNS central brain pars intercerebralis central nervous sys dors apodeme dors epidermis foregut sensory structure maxillary sensory complex vent epidermis vent midline vent nerve cord
Maxillary_sensory_complex	CG7296	CG7296	440	2736	2603.19	115.915	Set 1	4.47675	50.7959	cat_term:global_finito	list_4-6:no staining no staining	list_7-8:no staining no staining	cat_term:finito9-10 no staining	atrium PR dors epidermis PR gnathal PR vent epidermis PR	atrium dors epidermis vent epidermis
Maxillary_sensory_complex	dsx-c73A	CG32159	650	8048	3620.2	368.66	Set 1	3.2918	38.9165	cat_term:global_finito	list_4-6:no staining no staining	list_7-8:no staining no staining	cat_term:finito9-10 no staining	foregut PR hypopharynx PR P1 post spiracle SA	atrium dors epidermis dors imaginal precursor epipharynx foregut hindgut hypopharynx Malpighian tubule tip cell post spiracle rectum vent epidermis
Maxillary_sensory_complex	CG42741	CG42741	219	1748	1159.37	81.0384	Set 1	3.8209	38.8982	flag_for_volker no staining	hindgut AISN	hindgut A procephalic ectoderm A	inclusive hindgut PR procephalic ectoderm PR	dors/lateral sensory complexes PR head epidermis PR P1 labial sensory complex PR labral sensory complex PR maxillary sensory complex PR vent sensory complex SA	no staining
Maxillary_sensory_complex	nw	CG43164	835	13700	4641.49	564.186	Set 1	3.03779	37.0024	cat_term:global_finito	list_4-6:no staining no staining	no staining	cat_term:finito9-10 no staining	clypeo-labral PR foregut PR gnathal PR maxillary sensory complex PR tracheal PR vent epidermis PR	antennal sense organ atrium Bolwig's organ dors epidermis foregut head epidermis head epidermis dors hindgut maxillary sensory complex ring gland sensory sys head tracheal sys vent epidermis vent imaginal precursor
Maxillary_sensory_complex	hh	CG4637	217	3322	1181.34	141.319	Set 1	3.05323	31.1656	NA	NA	NA	NA	NA	NA
Maxillary_sensory_complex	Cpr65Eb	CG8638	110	1712	644.06	65.7545	Set 1	3.27026	30.5222	cat_term:global_finito	list_4-6:no staining no staining	list_7-8:no staining no staining	no staining	no staining	dors epidermis head epidermis vent epidermis
Maxillary_sensory_complex	CG15365	CG15365	202	3097	1113.39	149.264	Set 1	2.88939	29.2465	maternal	NA	NA	NA	NA	NA
Maxillary_sensory_complex	tyn	CG17131	1353	34222	7151.41	1580.07	Set 1	2.17733	27.879	NA	NA	NA	NA	NA	NA
Maxillary_sensory_complex	Tie	CG7525	98	1363	523.076	59.561	Set 1	3.11056	28.0996	maternal	no staining	no staining	no staining	no staining	dors prothoracic pharyngeal muscle esophagus foregut gonad hindgut
Maxillary_sensory_complex	CG16798	CG16798	138	2078	735.374	93.4102	Set 1	2.96146	28.2059	cat_term:global_finito	no staining	no staining	no staining	no staining	atrium dors epidermis dors histoblast nest abdominal dors imaginal precursor dors trunk head epidermis post spiracle sensory sys head tracheal sys vent epidermis vent imaginal precursor visceral branch
Maxillary_sensory_complex	klu	CG12296	719	17159	3892.2	755.915	Set 1	2.36238	28.1755	no staining	list_4-6:no staining no staining	list_7-8:specific no staining	ant endoderm PR central brain PR P3 faint ubiquitous post endoderm PR vent nerve cord PR P3	ant midgut PR brain PR dors epidermis PR faint ubiquitous neuroblasts of central brain neuroblasts of vent nervous sys post midgut PR post spiracle SA vent nerve cord PR	brain cat_term:any_neural cat_term:global_finito cat_term:PNS cat_term:subset_CNS dors epidermis faint ubiquitous head epidermis neuroblasts of central brain neuroblasts of vent nervous sys post spiracle rectum sensory nervous sys PR vent epidermis vent nerve cord
Maxillary_sensory_complex	knrl	CG4761	306	5308	1479.94	232.992	Set 1	2.661	28.0265	cat_term:global_finito flag_for_volker	ant endoderm AISN dors ectoderm AISN foregut AISN head mesoderm A head mesoderm AISN list_4-6:specific procephalic ectoderm AISN subset vent ectoderm AISN	ant endoderm A foregut A head mesoderm PR list_7-8:specific procephalic ectoderm A	ant endoderm PR dors ectoderm PR foregut PR head mesoderm PR procephalic ectoderm PR vent ectoderm PR	adult hindgut SA dors epidermis PR fat body/gonad PR foregut PR hindgut proper PR rectum SA small intestine SA tracheal PR vent epidermis PR	adult hindgut precursor atrium dors epidermis epipharynx esophagus foregut foregut sensory structure gonad head epidermis hindgut labral sensory complex Malpighian tubule tip cell rectum sensory sys head small intestine tracheal sys vent epidermis visceral branch
Maxillary_sensory_complex	Fili	CG34368	626	14237	3300.82	662.663	Set 1	2.31431	27.052	NA	NA	NA	NA	NA	NA
Maxillary_sensory_complex	bbg	CG42230	620	16180	3312.67	735.568	Set 1	2.1691	25.3659	cat_term:global_finito	dors ectoderm AISN hindgut AISN list_4-6:specific post endoderm AISN procephalic ectoderm AISN subset	dors ectoderm PR foregut A hindgut A list_7-8:specific mesectoderm PR post endoderm PR procephalic ectoderm A	ant endoderm PR dors ectoderm PR foregut PR inclusive hindgut PR mesectoderm PR post endoderm PR	ant midgut PR dors epidermis PR foregut PR hindgut proper PR post midgut PR proventriculus PR small intestine SA	dors epidermis epipharynx foregut hindgut hypopharynx midgut proventriculus ring gland sensory nervous sys PR small intestine vent epidermis vent midline
Posterior_Midgut_1	ham	CG31753	1472	3815	2608.78	167.976	Set 1	3.94848	44.8141	flag_for_volker no staining	ant endoderm AISN head mesoderm AISN	ant endoderm A head mesoderm PR	head mesoderm PR	plasmatocytes A post midgut PR	dors/lateral sensory complexes midgut vent sensory complex PR visceral muscle
Posterior_Midgut_1	CG33993	CG33993	1349	4242	2367.83	189.867	Set 1	3.63293	40.725	cat_term:global_finito	AISN cellular blastoderm gap list_4-6:specific post endoderm AISN subset	hindgut A post endoderm PR	ant endoderm PR inclusive hindgut PR post endoderm PR	ant midgut PR clypeo-labral PR gnathal PR labral sensory complex PR Malpighian tubule main body PR Malpighian tubule PR post midgut PR	atrium epipharynx labral sensory complex Malpighian tubule midgut vent epidermis
Posterior_Midgut_1	FucTC	CG40305	248	531	427.219	22.0127	Set 1	4.21447	36.8438	NA	NA	NA	NA	NA	NA
Posterior_Midgut_1	vnd	CG6172	387	999	657.534	41.4653	Set 1	3.95271	37.0097	cat_term:global_finito no staining	central brain AISN no staining procephalic ectoderm AISN vent ectoderm A vent ectoderm AISN	central brain A no staining vent nerve cord A	central brain PR P3 no staining vent nerve cord PR P3	ant midgut PR brain PR no staining post midgut PR vent nerve cord PR	brain midgut chamber no staining vent nerve cord
Posterior_Midgut_1	grn	CG9656	3057	17280	5388.34	760.495	Set 1	2.82293	34.9928	cat_term:global_finito maternal no staining	dors ectoderm AISN list_4-6:no staining maternal no staining procephalic ectoderm AISN	dors ectoderm PR list_7-8:no staining no staining procephalic ectoderm A	clypeolabrum PR dors epidermis A no staining procephalic ectoderm PR	brain PR clypeo-labral PR dors epidermis PR no staining post spiracle SA	brain cuprophilic cell dors epidermis epipharynx midgut no staining post spiracle proventriculus
Posterior_Midgut_1	sens-2	CG31632	425	1648	757.57	71.039	Set 1	3.39453	32.4759	no staining	list_4-6:no staining no staining	no staining	cat_term:finito9-10 no staining	no staining post midgut PR	cat_term:global_finito midgut chamber no staining
Posterior_Midgut_1	Oatp33Ea	CG5427	167	580	299.464	24.6597	Set 1	3.54481	29.1775	NA	post endoderm AISN yolk	post endoderm PR	ant endoderm PR post endoderm PR	ant midgut PR post midgut PR	midgut midgut chamber
Posterior_Midgut_1	bru2	CG43065	2117	13374	3685.85	612.262	Set 1	2.58742	30.6562	NA	NA	NA	NA	NA	NA
Posterior_Midgut_1	CG15347	CG15347	722	3344	1255.54	157.979	Set 1	2.9814	30.6942	cat_term:global_finito no staining	list_4-6:no staining no staining	list_7-8:no staining no staining	no staining	amnioserosa no staining yolk nuclei	amnioserosa gastric caecum midgut midgut chamber yolk nuclei
Posterior_Midgut_1	trol	CG33950	5439	46217	9627.26	2176.1	Set 1	2.14472	28.3812	cat_term:global_finito no staining	list_4-6:no staining no staining	list_7-8:no staining no staining	no staining	germ cell no staining	circulatory sys dors epidermis dors vessel epipharynx foregut sensory structure hypopharynx lateral cord lateral cord glia lymph gland midgut muscle sys no staining proventriculus proventriculus inner layer proventriculus intermediate layer proventriculus outer layer ring gland somatic muscle vent midline vent nerve cord
Posterior_Midgut_1	Hnf4	CG9310	547	3052	965.182	128.262	Set 1	2.9005	28.7618	cat_term:global_finito maternal ubiquitous	apically cleared no staining strong ubiquitous ubiquitous	faint ubiquitous ubiquitous	no staining ubiquitous	ant midgut PR foregut PR hindgut proper PR post midgut PR ubiquitous	foregut hindgut midgut oenocyte ubiquitous
Posterior_Midgut_1	CG15365	CG15365	540	2982	961.14	138.318	Set 1	2.78637	27.6132	maternal	NA	NA	NA	NA	NA
Posterior_Midgut_1	CG4301	CG4301	225	868	390.729	41.0087	Set 1	3.21741	27.7138	cat_term:global_finito no staining	no staining	no staining	no staining	no staining	no staining
Posterior_Midgut_1	Trim9	CG31721	1544	10949	2723.23	492.567	Set 1	2.464	28.1183	cat_term:global_finito	dors ectoderm AISN list_4-6:specific procephalic ectoderm AISN subset vent ectoderm AISN	list_7-8:specific procephalic ectoderm A vent ectoderm PR vent nerve cord A visual A	procephalic ectoderm PR vent nerve cord PR P3	ant midgut PR brain PR central brain neuron lateral cord neuron neuroblasts of vent nervous sys post midgut PR procephalic neuroblasts vent nerve cord PR	brain cat_term:any_neural cat_term:PNS cat_term:subset_CNS central nervous sys lateral cord neuron midgut sensory nervous sys PR vent nerve cord vent sensory complex PR
Posterior_Midgut_1	Itgbn	CG1762	229	926	415.127	42.6412	Set 1	3.24979	28.2761	cat_term:global_finito	list_4-6:no staining no staining	no staining	no staining	no staining	midgut
Posterior_Midgut_1	Pde9	CG42276	1531	11158	2738.05	522.609	Set 1	2.38659	27.2535	NA	NA	NA	NA	NA	NA
Posterior_Midgut_1	CG13284	CG13284	360	1842	626.759	81.0434	Set 1	2.93345	27.2637	cat_term:global_finito	no staining	list_7-8:no staining no staining	no staining	post midgut PR	anal pad hindgut large intestine midgut midgut chamber rectum
Posterior_Midgut_1	GATAe	CG10278	436	2594	756.138	111.086	Set 1	2.75404	26.3408	cat_term:global_finito maternal	faint ubiquitous list_4-6:no staining no staining post endoderm AISN	ant endoderm A hindgut A list_7-8:specific post endoderm PR	ant endoderm PR inclusive hindgut PR Malpighian tubule A post endoderm PR	ant midgut PR Malpighian tubule PR post midgut PR proventriculus PR	cat_term:global_finito Malpighian tubule midgut midgut chamber proventriculus
Posterior_Midgut_1	Mitf	CG43369	408	2173	700.414	100.298	Set 1	2.7896	26.3732	cat_term:global_finito maternal no staining	no staining procephalic ectoderm AISN ubiquitous	faint ubiquitous no staining procephalic ectoderm A vent nerve cord A	faint ubiquitous no staining procephalic ectoderm PR vent nerve cord PR P3	brain PR clypeo-labral PR faint ubiquitous head epidermis PR P1 no staining vent nerve cord PR	brain clypeolabrum faint ubiquitous head epidermis no staining vent nerve cord
Posterior_Midgut_1	mesh	CG31004	818	6099	1437.09	252.137	Set 1	2.50516	26.279	no staining	list_4-6:no staining no staining	no staining	cat_term:finito9-10 no staining	no staining	cat_term:global_finito hindgut Malpighian tubule midgut proventriculus
Midgut_4th_chamber	CG3106	CG3106	1098	635	1506.93	23.6738	Set 1	5.93249	62.6374	cat_term:global_finito	list_4-6:no staining no staining	list_7-8:no staining no staining	no staining	no staining	gastric caecum midgut
Midgut_4th_chamber	Mal-A3	CG8695	709	616	968.875	23.1851	Set 1	5.32412	52.8241	cat_term:global_finito no staining	list_4-6:no staining no staining	list_7-8:no staining no staining	no staining	no staining	midgut midgut chamber
Midgut_4th_chamber	CG4839	CG4839	342	290	480.444	13.3153	Set 1	5.06874	45.1686	cat_term:global_finito no staining	no staining	list_7-8:no staining no staining	no staining	no staining	midgut midgut chamber
Midgut_4th_chamber	Eglp2	CG17664	312	268	429.29	10.2448	Set 1	5.25463	45.9736	no staining	no staining	no staining	no staining	no staining	cat_term:global_finito midgut
Midgut_4th_chamber	ham	CG31753	2114	3909	2918.99	171.241	Set 1	4.08297	47.0021	flag_for_volker no staining	ant endoderm AISN head mesoderm AISN	ant endoderm A head mesoderm PR	head mesoderm PR	plasmatocytes A post midgut PR	dors/lateral sensory complexes midgut vent sensory complex PR visceral muscle
Midgut_4th_chamber	CG31198	CG31198	326	366	438.116	12.9211	Set 1	4.97597	43.6813	no staining	no staining	no staining	no staining	no staining	midgut midgut chamber
Midgut_4th_chamber	CG13492	CG13492	435	525	606.467	20.0467	Set 1	4.84876	44.8348	NA	NA	NA	NA	NA	NA
Midgut_4th_chamber	CG9568	CG9568	326	305	461.386	13.9848	Set 1	4.9444	43.7725	NA	list_4-6:no staining no staining	list_7-8:no staining no staining	no staining	no staining	cat_term:global_finito gastric caecum main segment of Malpighian tubule Malpighian tubule midgut midgut chamber
Midgut_4th_chamber	CG15347	CG15347	1609	3256	2239.33	149.891	Set 1	3.89148	43.3103	cat_term:global_finito no staining	list_4-6:no staining no staining	list_7-8:no staining no staining	no staining	amnioserosa no staining yolk nuclei	amnioserosa gastric caecum midgut midgut chamber yolk nuclei
Midgut_4th_chamber	CG18585	CG18585	151	113	226.767	4.21797	Set 1	5.44158	42.6153	NA	NA	NA	NA	NA	NA
Midgut_4th_chamber	CG9512	CG9512	472	916	667.474	32.4605	Set 1	4.31818	40.5249	NA	NA	NA	NA	NA	NA
Midgut_4th_chamber	CG9673	CG9673	155	144	204.71	4.9854	Set 1	5.09599	39.16	cat_term:global_finito	list_4-6:no staining no staining	no staining	no staining	no staining	midgut midgut chamber
Midgut_4th_chamber	LManV	CG9466	125	214	177.652	7.18784	Set 1	4.43943	33.2114	cat_term:global_finito	list_4-6:no staining no staining	list_7-8:no staining no staining	cat_term:finito9-10 no staining	no staining	hindgut midgut midgut chamber
Midgut_4th_chamber	Agpat4	CG4753	1073	3115	1506.68	134.262	Set 1	3.47755	36.7163	cat_term:global_finito maternal	list_4-6:no staining no staining	list_7-8:no staining no staining	no staining	ant midgut PR post midgut PR	midgut midgut chamber
Midgut_4th_chamber	CG13284	CG13284	669	1763	936.181	75.1474	Set 1	3.61992	35.7365	cat_term:global_finito	no staining	list_7-8:no staining no staining	no staining	post midgut PR	anal pad hindgut large intestine midgut midgut chamber rectum
Midgut_4th_chamber	CNT2	CG8083	174	191	240.353	8.15029	Set 1	4.71519	37.3208	cat_term:global_finito	list_4-6:no staining no staining	list_7-8:specific no staining yolk nuclei	no staining yolk nuclei	no staining	amnioserosa hindgut midgut midgut chamber
Midgut_4th_chamber	kappaTry	CG12388	77	44	106.433	1.66577	Set 1	5.31925	35.8905	NA	NA	NA	NA	NA	NA
Midgut_4th_chamber	Ugt37B1	CG9481	117	107	159.474	3.79859	Set 1	5.05457	37.0307	NA	AISN list_4-6:specific procephalic ectoderm AISN subset	list_7-8:specific procephalic ectoderm A	central brain PR P3 procephalic ectoderm PR vent nerve cord PR P3 visual PR	brain PR dors/lateral sensory complexes PR sensory nervous sys SA vent nerve cord PR	brain central nervous sys midgut sensory nervous sys PR vent midline vent nerve cord
Midgut_4th_chamber	lambdaTry	CG12350	97	91	138.531	3.7808	Set 1	4.85682	34.6021	cat_term:global_finito	no staining	list_7-8:no staining no staining	no staining	no staining	midgut midgut chamber
Midgut_4th_chamber	Cyp4d1	CG3656	118	151	169.772	7.10272	Set 1	4.38905	32.5488	cat_term:global_finito no staining	no staining	no staining	no staining	no staining	no staining
Posterior_midgut_3	CG5715	CG5715	32	17	123.086	0.801385	Set 1	6.09441	42.3879	maternal	faint ubiquitous	no staining	no staining	no staining	no staining
Posterior_midgut_3	CG15347	CG15347	464	3468	1866.96	166.358	Set 1	3.47968	37.8146	cat_term:global_finito no staining	list_4-6:no staining no staining	list_7-8:no staining no staining	no staining	amnioserosa no staining yolk nuclei	amnioserosa gastric caecum midgut midgut chamber yolk nuclei
Posterior_midgut_3	CG7298	CG7298	92	476	382.592	20.5254	Set 1	4.1517	35.6358	cat_term:global_finito	list_4-6:no staining no staining	list_7-8:no staining no staining	no staining	no staining	cat_term:global_finito proventriculus
Posterior_midgut_3	CG9568	CG9568	64	311	267.897	15.4638	Set 1	4.02431	32.4798	NA	list_4-6:no staining no staining	list_7-8:no staining no staining	no staining	no staining	cat_term:global_finito gastric caecum main segment of Malpighian tubule Malpighian tubule midgut midgut chamber
Posterior_midgut_3	Jheh3	CG15106	212	2051	861.566	89.5522	Set 1	3.25014	31.697	NA	NA	NA	NA	NA	NA
Posterior_midgut_3	Lfg	CG3814	161	1496	683.409	69.5658	Set 1	3.27571	30.853	cat_term:global_finito	list_4-6:no staining no staining	list_7-8:no staining no staining	no staining	no staining	midgut midgut chamber
Posterior_midgut_3	Agpat4	CG4753	253	3171	1061.6	140.37	Set 1	2.90869	29.2421	cat_term:global_finito maternal	list_4-6:no staining no staining	list_7-8:no staining no staining	no staining	ant midgut PR post midgut PR	midgut midgut chamber
Posterior_midgut_3	CG4562	CG4562	106	924	409.821	35.7645	Set 1	3.47861	30.2026	maternal no staining ubiquitous	no staining	hindgut A no staining	inclusive hindgut PR no staining	no staining	Malpighian tubule no staining salivary gland
Posterior_midgut_3	CG4781	CG4781	127	1104	496.192	50.4107	Set 1	3.27076	29.2983	cat_term:finito1-3 cat_term:global_finito	cat_term:finito4-6 no staining	cat_term:finito7-8 list_7-8:no staining no staining	cat_term:finito9-10 no staining	cat_term:finito11-12 no staining	cat_term:finito13-16 gastric caecum midgut midgut chamber
Posterior_midgut_3	CG9903	CG9903	28	172	122.17	6.88068	Set 1	3.95443	27.4616	NA	NA	NA	NA	NA	NA
Posterior_midgut_3	CG17636	CG17636	22	125	84.1153	5.1124	Set 1	3.78256	24.2513	NA	NA	NA	NA	NA	NA
Posterior_midgut_3	CG5096	CG5096	67	564	282.604	26.1216	Set 1	3.38127	27.5496	maternal	maternal	ant endoderm A head mesoderm PR list_7-8:specific post endoderm PR trunk mesoderm PR ubiquitous	ant endoderm PR central brain PR P3 foregut PR head mesoderm PR post endoderm PR trunk mesoderm PR ubiquitous vent nerve cord PR P3	ant midgut PR brain PR cardiac mesoderm PR dors epidermis PR dors pharyngeal muscle PR fat body/gonad PR foregut PR muscle sys PR post midgut PR somatic muscle PR vent nerve cord PR visceral muscle PR	brain central nervous sys lateral cord midgut sensory nervous sys PR vent nerve cord
Posterior_midgut_3	Tsp29Fa	CG9494	51	566	223.217	23.4567	Set 1	3.19014	24.9111	cat_term:global_finito	list_4-6:no staining no staining	list_7-8:no staining no staining	no staining	no staining	midgut midgut chamber
Posterior_midgut_3	CG10650	CG10650	144	1983	581.137	86.8381	Set 1	2.72596	25.0385	no staining	list_4-6:no staining no staining	list_7-8:no staining no staining	cat_term:finito9-10 no staining	no staining	cat_term:global_finito midgut midgut chamber proventriculus outer layer
Posterior_midgut_3	CG18585	CG18585	17	107	79.2304	4.89157	Set 1	3.74933	23.7185	NA	NA	NA	NA	NA	NA
Posterior_midgut_3	CG15818	CG15818	74	704	270.512	32.8333	Set 1	2.99918	24.2479	cat_term:global_finito	list_4-6:no staining no staining	list_7-8:no staining no staining	no staining	no staining	cat_term:global_finito midgut proventriculus
Posterior_midgut_3	CNT2	CG8083	32	268	129.143	11.5802	Set 1	3.35975	23.5987	cat_term:global_finito	list_4-6:no staining no staining	list_7-8:specific no staining yolk nuclei	no staining yolk nuclei	no staining	amnioserosa hindgut midgut midgut chamber
Posterior_midgut_3	ham	CG31753	257	4125	950.282	186.672	Set 1	2.34014	23.1527	flag_for_volker no staining	ant endoderm AISN head mesoderm AISN	ant endoderm A head mesoderm PR	head mesoderm PR	plasmatocytes A post midgut PR	dors/lateral sensory complexes midgut vent sensory complex PR visceral muscle
Posterior_midgut_3	CG13912	CG13912	28	280	121.464	12.3192	Set 1	3.18895	22.1192	cat_term:global_finito	endoderm AISN head mesoderm AISN list_4-6:specific mesoderm AISN trunk mesoderm AISN	ant endoderm A foregut A head mesoderm PR list_7-8:specific post endoderm PR procephalic ectoderm A trunk mesoderm PR vent ectoderm PR visual A	procephalic ectoderm PR vent ectoderm PR vent nerve cord PR P3 visual PR	brain PR central brain glia central brain neuron ganglion mother cell lateral cord glia lateral cord neuron neuroblasts of vent nervous sys optic lobe PR procephalic neuroblasts sensory nervous sys SA vent epidermis PR vent nerve cord PR	brain cat_term:any_neural cat_term:subset_CNS central brain surface glia central nervous sys dors epidermis optic lobe vent epidermis vent nerve cord
Posterior_midgut_3	CG4301	CG4301	79	886	303.185	41.1533	Set 1	2.84648	23.48	cat_term:global_finito no staining	no staining	no staining	no staining	no staining	no staining
Midgut_primordium	grn	CG9656	1637	17266	6948.37	769.986	Set 1	3.1719	40.4819	cat_term:global_finito maternal no staining	dors ectoderm AISN list_4-6:no staining maternal no staining procephalic ectoderm AISN	dors ectoderm PR list_7-8:no staining no staining procephalic ectoderm A	clypeolabrum PR dors epidermis A no staining procephalic ectoderm PR	brain PR clypeo-labral PR dors epidermis PR no staining post spiracle SA	brain cuprophilic cell dors epidermis epipharynx midgut no staining post spiracle proventriculus
Midgut_primordium	Clk	CG7391	22	33	102.132	1.52954	Set 1	5.33542	35.6852	cat_term:global_finito no staining	no staining	no staining	no staining	no staining	no staining
Midgut_primordium	Sox21a	CG7345	61	375	298.096	15.9315	Set 1	4.138	34.0328	maternal no staining	no staining ubiquitous	faint ubiquitous no staining	faint ubiquitous no staining	faint ubiquitous no staining	faint ubiquitous no staining
Midgut_primordium	CG17834	CG17834	189	1498	817.699	71.7745	Set 1	3.49006	33.774	cat_term:global_finito	list_4-6:no staining no staining	list_7-8:no staining no staining	no staining	anal pad SA post midgut PR	anal pad hindgut Malpighian tubule midgut
Midgut_primordium	wb	CG42677	811	10386	3494.2	472.959	Set 1	2.88213	33.926	NA	NA	NA	NA	NA	NA
Midgut_primordium	Zasp52	CG30084	623	8532	2707.8	356.55	Set 1	2.9209	33.3083	flag_for_volker maternal no staining	cellular blastoderm mesectoderm AISN no staining ubiquitous	ant endoderm A faint ubiquitous mesectoderm PR no staining post endoderm PR	ant endoderm PR faint ubiquitous mesectoderm PR no staining post endoderm PR	ant midgut PR dors vessel SA faint ubiquitous no staining post midgut PR somatic muscle PR	dors vessel epipharynx faint ubiquitous hypopharynx midgut no staining somatic muscle
Midgut_primordium	Trim9	CG31721	883	11360	3684.14	516.043	Set 1	2.83297	33.5637	cat_term:global_finito	dors ectoderm AISN list_4-6:specific procephalic ectoderm AISN subset vent ectoderm AISN	list_7-8:specific procephalic ectoderm A vent ectoderm PR vent nerve cord A visual A	procephalic ectoderm PR vent nerve cord PR P3	ant midgut PR brain PR central brain neuron lateral cord neuron neuroblasts of vent nervous sys post midgut PR procephalic neuroblasts vent nerve cord PR	brain cat_term:any_neural cat_term:PNS cat_term:subset_CNS central nervous sys lateral cord neuron midgut sensory nervous sys PR vent nerve cord vent sensory complex PR
Midgut_primordium	bru2	CG43065	969	13427	4118.75	623.706	Set 1	2.72096	32.6742	NA	NA	NA	NA	NA	NA
Midgut_primordium	vnd	CG6172	116	1134	507.779	47.6008	Set 1	3.38515	30.4355	cat_term:global_finito no staining	central brain AISN no staining procephalic ectoderm AISN vent ectoderm A vent ectoderm AISN	central brain A no staining vent nerve cord A	central brain PR P3 no staining vent nerve cord PR P3	ant midgut PR brain PR no staining post midgut PR vent nerve cord PR	brain midgut chamber no staining vent nerve cord
Midgut_primordium	CG42594	CG42594	184	1759	823.581	81.9493	Set 1	3.31161	32.0813	NA	NA	NA	NA	NA	NA
Midgut_primordium	Pdp1	CG17888	2827	56729	12104.8	2489.59	Set 1	2.28102	30.9384	maternal no staining	no staining post endoderm AISN	post endoderm PR	ant endoderm PR post endoderm PR	anal pad SA ant midgut PR head mesoderm PR post midgut PR	anal pad dors prothoracic pharyngeal muscle fat body midgut muscle sys visceral muscle of esophagus
Midgut_primordium	Oatp33Ea	CG5427	84	639	348.488	27.3076	Set 1	3.62185	30.6014	NA	post endoderm AISN yolk	post endoderm PR	ant endoderm PR post endoderm PR	ant midgut PR post midgut PR	midgut midgut chamber
Midgut_primordium	CG33993	CG33993	342	4531	1523.52	208.88	Set 1	2.85977	30.2396	cat_term:global_finito	AISN cellular blastoderm gap list_4-6:specific post endoderm AISN subset	hindgut A post endoderm PR	ant endoderm PR inclusive hindgut PR post endoderm PR	ant midgut PR clypeo-labral PR gnathal PR labral sensory complex PR Malpighian tubule main body PR Malpighian tubule PR post midgut PR	atrium epipharynx labral sensory complex Malpighian tubule midgut vent epidermis
Midgut_primordium	Ance	CG8827	554	9118	2464.41	400.945	Set 1	2.61617	29.478	cat_term:global_finito	AISN amnioserosa AISN dors ectoderm AISN ectoderm AISN list_4-6:specific procephalic ectoderm AISN subset	amnioserosa A ant endoderm A dors ectoderm PR hindgut A list_7-8:specific procephalic ectoderm A	amnioserosa amnioserosa PR ant endoderm PR inclusive hindgut PR post endoderm PR	amnioserosa ant midgut PR head epidermis dors PR P1 Malpighian tubule PR post midgut PR proventriculus PR	amnioserosa head epidermis head epidermis dors hindgut lymph gland midgut prothoracic gland proventriculus ring gland
Midgut_primordium	Myc	CG10798	1481	29680	6358.8	1221.19	Set 1	2.37929	30.0617	(localised) cat_term:global_finito flag_for_volker maternal no staining pole plasm	AISN ant endoderm AISN cellular blastoderm endoderm AISN foregut AISN head mesoderm AISN hindgut AISN list_4-6:specific no staining post endoderm A post endoderm AISN procephalic ectoderm AISN subset trunk mesoderm AISN ubiquitous	ant endoderm A clypeolabrum A foregut A head mesoderm PR hindgut A list_7-8:specific post endoderm PR trunk mesoderm PR	ant endoderm PR clypeolabrum PR foregut PR head mesoderm PR inclusive hindgut PR post endoderm PR salivary gland body SA trunk mesoderm PR	anal pad SA ant midgut PR clypeo-labral PR dors pharyngeal muscle PR foregut PR hindgut proper PR hypopharynx PR P1 post midgut PR proventriculus PR salivary gland body PR somatic muscle PR tracheal PR trunk mesoderm PR	anal pad corpus cardiacum dors prothoracic pharyngeal muscle epipharynx fat body hindgut hypopharynx large intestine lymph gland midgut muscle sys proventriculus salivary gland duct somatic muscle
Midgut_primordium	dally	CG4974	848	14989	3660.07	672.505	Set 1	2.44211	28.9098	NA	NA	NA	NA	NA	NA
Midgut_primordium	px	CG4444	1025	21870	4412.65	998.656	Set 1	2.14214	25.9365	maternal	ubiquitous	ubiquitous	ubiquitous	ant midgut PR fat body/gonad PR post midgut PR ubiquitous	fat body foregut hindgut lymph gland Malpighian tubule midgut salivary gland
Midgut_primordium	ZnT41F	CG11163	153	2514	706.131	112.788	Set 1	2.63359	24.9291	cat_term:global_finito flag_for_volker	list_4-6:no staining no staining	list_7-8:no staining no staining	cat_term:finito9-10 no staining	ant midgut PR brain PR clypeo-labral PR hindgut proper PR post midgut PR	central brain hindgut midgut midgut chamber
Midgut_primordium	FucTC	CG40305	45	650	206.123	29.362	Set 1	2.76316	21.2607	NA	NA	NA	NA	NA	NA
Midgut_primordium	nub	CG34395	185	2940	773.308	123.896	Set 1	2.63032	25.2425	cat_term:global_finito	clypeolabrum AISN dors ectoderm A gap list_4-6:specific trunk mesoderm AISN vent ectoderm AISN	clypeolabrum A dors ectoderm PR list_7-8:specific vent ectoderm PR	central brain PR P3 procephalic ectoderm PR vent ectoderm PR vent epidermis PR vent nerve cord PR P3	ant midgut PR brain PR clypeo-labral PR epipharynx PR P1 hypopharynx PR P1 post midgut PR vent nerve cord PR	brain cat_term:any_neural cat_term:subset_CNS clypeolabrum epipharynx hypopharynx midgut proventriculus vent nerve cord
Monoaminergic	Vmat	CG33528	2712	1903	15821.4	73.2442	Set 1	7.73538	107.906	no staining	no staining	no staining	no staining	no staining	no staining
Monoaminergic	Tbh	CG1543	610	197	3457.39	7.47639	Set 1	8.67202	101.947	NA	NA	NA	NA	NA	NA
Monoaminergic	Tdc2	CG30446	218	120	1316.01	4.34864	Set 1	7.94278	82.3115	NA	NA	NA	NA	NA	NA
Monoaminergic	CG31191	CG31191	205	176	1286.58	6.52623	Set 1	7.41739	76.625	cat_term:global_finito no staining	no staining	no staining	no staining	no staining	no staining
Monoaminergic	CG2269	CG2269	233	258	1357.69	10.0395	Set 1	6.94233	72.2557	NA	NA	NA	NA	NA	NA
Monoaminergic	GluRIB	CG43743	294	572	1618.62	26.4458	Set 1	5.88204	62.7111	NA	NA	NA	NA	NA	NA
Monoaminergic	CG45002	CG45002	473	1625	2730.74	73.1391	Set 1	5.20292	59.3944	cat_term:global_finito no staining	no staining	no staining	no staining	no staining	no staining
Monoaminergic	DAT	CG8380	94	203	615.194	8.051	Set 1	6.08682	56.408	cat_term:global_finito	list_4-6:no staining no staining post endoderm AISN procephalic ectoderm AISN subset yolk nuclei	list_7-8:specific no staining yolk nuclei	no staining	no staining yolk nuclei	brain cat_term:any_neural cat_term:subset_CNS central brain neuron central nervous sys lateral cord neuron midgut midgut chamber proventriculus inner layer proventriculus outer layer ring gland tracheal sys vent nerve cord vent sensory complex PR yolk nuclei
Monoaminergic	cpx	CG32490	546	3000	3175.73	132.084	Set 1	4.57667	53.2419	no staining	no staining	no staining	no staining	brain PR vent nerve cord PR	brain vent nerve cord
Monoaminergic	Octalpha2R	CG18208	531	2531	2860.66	111.147	Set 1	4.67288	53.657	NA	NA	NA	NA	NA	NA
Monoaminergic	CadN2	CG42829	179	664	988.901	29.2017	Set 1	5.03312	50.0853	NA	NA	NA	NA	NA	NA
Monoaminergic	IA-2	CG31795	308	2272	1784.65	78.5594	Set 1	4.48747	48.4747	NA	NA	NA	NA	NA	NA
Monoaminergic	mtt	CG30361	216	955	1210.48	44.5481	Set 1	4.73205	48.4683	no staining	no staining	no staining	no staining	no staining	no staining
Monoaminergic	Octbeta2R	CG33976	293	1438	1593.46	64.8211	Set 1	4.59746	48.9117	cat_term:global_finito no staining	no staining	no staining	no staining	no staining	brain no staining vent nerve cord
Monoaminergic	Nckx30C	CG18660	650	5198	3802.23	227.579	Set 1	4.05608	48.239	no staining	list_4-6:no staining no staining	list_7-8:no staining no staining	no staining	no staining	NA
Monoaminergic	Pde1c	CG44007	720	5594	4213.11	265.375	Set 1	3.98336	47.9637	NA	list_4-6:no staining	NA	NA	procrystal cell	cat_term:global_finito crystal cell lymph gland vent midline
Monoaminergic	GluRIA	CG8442	57	129	331.593	5.94461	Set 1	5.57738	46.7251	cat_term:global_finito	dors ectoderm AISN hindgut AISN list_4-6:specific subset	no staining	no staining	no staining	brain central brain glia central nervous sys lateral cord glia vent midline vent nerve cord
Monoaminergic	SerT	CG4545	42	114	276.118	4.21621	Set 1	5.72614	46.4639	cat_term:global_finito	list_4-6:no staining no staining	no staining	no staining	no staining	brain central brain neuron lateral cord neuron vent nerve cord
Monoaminergic	vg	CG3830	121	620	697.314	25.9681	Set 1	4.69248	44.3333	no staining	no staining	no staining	no staining	no staining	brain cat_term:global_finito central nervous sys vent nerve cord
Monoaminergic	rad	CG44424	255	1823	1434.28	80.4572	Set 1	4.13814	43.3972	NA	NA	NA	NA	NA	NA
Multidendritic_sensory	ppk	CG3478	469	71	379.508	2.23601	Set 1	6.87377	58.9205	no staining	list_4-6:no staining no staining	no staining	no staining	no staining	cat_term:global_finito dors/lateral sensory complexes sensory nervous sys PR sensory sys head vent sensory complex PR
Multidendritic_sensory	ppk26	CG8546	307	51	246.442	1.31808	Set 1	6.73217	53.5272	NA	NA	NA	NA	NA	NA
Multidendritic_sensory	para	CG9907	3531	4784	3747.32	194.85	Set 1	4.25804	50.5516	NA	NA	NA	NA	NA	NA
Multidendritic_sensory	unc-13-4A	CG32381	999	883	1194.24	35.7303	Set 1	5.02298	51.3504	no staining	no staining	no staining	no staining	no staining	no staining
Multidendritic_sensory	pHCl-1	CG44099	1185	1086	1382.41	46.7491	Set 1	4.85557	50.6631	NA	NA	NA	NA	NA	NA
Multidendritic_sensory	igl	CG18285	530	468	586.328	17.7051	Set 1	4.9702	45.7161	cat_term:global_finito	list_4-6:no staining no staining	list_7-8:no staining no staining	cat_term:finito9-10 no staining	no staining	central brain glia central nervous sys dors epidermis dors/lateral sensory complexes head epidermis labral sensory complex lateral cord glia sensory nervous sys PR sensory sys head vent nerve cord vent sensory complex PR
Multidendritic_sensory	Tmc	CG46121	267	154	278.36	6.53808	Set 1	5.20661	42.3088	NA	NA	NA	NA	NA	NA
Multidendritic_sensory	Frq1	CG5744	1120	1942	1288.39	78.0913	Set 1	4.02591	41.5976	no staining	no staining	no staining	no staining	no staining	brain cat_term:global_finito vent nerve cord
Multidendritic_sensory	dysc	CG43749	1757	3369	2023.5	143.697	Set 1	3.80574	41.7998	cat_term:global_finito no staining	no staining	no staining	no staining	no staining	no staining
Multidendritic_sensory	klg	CG6669	2498	6933	3389.99	321.114	Set 1	3.39564	39.8223	NA	NA	NA	NA	NA	NA
Multidendritic_sensory	cac	CG43368	3899	10235	4974.6	478.755	Set 1	3.37421	41.4375	cat_term:global_finito	no staining	no staining	no staining	no staining	brain central brain glia central nervous sys lateral cord glia vent nerve cord
Multidendritic_sensory	CG42458	CG42458	469	622	604.729	26.7577	Set 1	4.44533	41.0861	NA	NA	NA	NA	NA	NA
Multidendritic_sensory	Slob	CG43756	519	727	569.758	31.723	Set 1	4.12197	37.7438	no staining	no staining	no staining	no staining	no staining	no staining
Multidendritic_sensory	RluA-1	CG31719	687	1148	849.48	47.3937	Set 1	4.13369	40.2296	cat_term:global_finito no staining	no staining	no staining	no staining	no staining	no staining
Multidendritic_sensory	2mit	CG42573	684	1249	836.638	51.6013	Set 1	3.99143	38.7576	no staining	no staining	no staining	no staining	no staining	brain central brain glia central nervous sys lateral cord glia sensory nervous sys PR tracheal sys vent nerve cord
Multidendritic_sensory	dpr8	CG32600	1174	2572	1506.3	118.09	Set 1	3.66089	38.6508	NA	NA	NA	NA	NA	NA
Multidendritic_sensory	Cib2	CG9236	137	93	143.098	4.02025	Set 1	4.8331	34.6578	NA	NA	NA	NA	NA	NA
Multidendritic_sensory	OtopLa	CG42492	2131	7319	2808.86	319.057	Set 1	3.13359	35.8992	cat_term:global_finito no staining	no staining	no staining	no staining	no staining	no staining
Multidendritic_sensory	CG14082	CG14082	124	102	147.397	3.85157	Set 1	4.92511	35.5264	NA	NA	NA	NA	NA	NA
Multidendritic_sensory	nompC	CG11020	200	140	191.184	5.5168	Set 1	4.87465	36.9808	NA	NA	NA	NA	NA	NA
Muscle_system	up	CG7107	24733	25245	13495.9	986.133	Set 1	3.77314	51.7688	cat_term:global_finito maternal no staining	list_4-6:no staining no staining	list_7-8:no staining no staining	cat_term:finito9-10 no staining	no staining	cat_term:global_finito dors prothoracic pharyngeal muscle muscle sys somatic muscle visceral muscle
Muscle_system	bt	CG32019	31445	40455	16680.9	1367.51	Set 1	3.60752	50.599	NA	list_4-6:no staining no staining	no staining	no staining	no staining	cat_term:global_finito dors prothoracic pharyngeal muscle muscle sys somatic muscle
Muscle_system	Sh	CG12348	9814	8339	5337.15	356.683	Set 1	3.89932	48.2818	no staining	no staining	no staining	no staining	no staining	no staining
Muscle_system	wupA	CG7178	15322	18677	8226.58	697.402	Set 1	3.55816	46.2784	cat_term:global_finito flag_for_volker no staining	no staining	list_7-8:no staining no staining	no staining	no staining	dors prothoracic pharyngeal muscle muscle sys somatic muscle visceral muscle
Muscle_system	Mhc	CG17927	25471	46980	13678.5	1561.99	Set 1	3.12953	42.9988	NA	NA	NA	NA	NA	NA
Muscle_system	CG33521	CG33521	2727	2254	1475.74	92.4213	Set 1	3.98154	41.9185	NA	list_4-6:no staining no staining	no staining	no staining	no staining	cat_term:global_finito muscle sys somatic muscle
Muscle_system	Nlg1	CG31146	1034	597	557.904	25.9714	Set 1	4.37052	39.8873	cat_term:global_finito no staining	no staining	no staining	no staining	no staining	no staining
Muscle_system	Neto	CG44328	1463	1122	797.086	49.1954	Set 1	3.98911	38.4566	cat_term:global_finito no staining	no staining	no staining	no staining	no staining	no staining
Muscle_system	CG1674	CG1674	1945	1949	1054.87	72.8219	Set 1	3.83687	38.5383	maternal no staining	list_4-6:no staining maternal no staining	no staining	no staining	no staining ubiquitous	cat_term:global_finito central nervous sys dors prothoracic pharyngeal muscle muscle sys somatic muscle vent nerve cord
Muscle_system	mspo	CG10145	4826	5723	2558.26	250.109	Set 1	3.34878	37.9132	cat_term:global_finito	AISN dors ectoderm AISN hindgut AISN list_4-6:specific	hindgut A list_7-8:specific	no staining	no staining	brain central nervous sys circulatory sys dors prothoracic pharyngeal muscle dors/lateral sensory complexes muscle sys pericardial cell sensory sys head vent nerve cord vent sensory complex PR
Muscle_system	Mrtf	CG32296	4761	6930	2538.05	286.453	Set 1	3.14232	35.5399	cat_term:global_finito maternal	ubiquitous	ubiquitous	ubiquitous	ubiquitous	somatic muscle ubiquitous visceral muscle
Muscle_system	Eip63F-1	CG15855	2149	2477	1128.35	106.342	Set 1	3.39393	34.4188	NA	NA	NA	NA	NA	NA
Muscle_system	sls	CG1915	12636	31661	6652.74	1040.08	Set 1	2.67587	33.9834	cat_term:global_finito	list_4-6:no staining no staining	list_7-8:no staining no staining	no staining	no staining	ant spiracle brain central nervous sys dors prothoracic pharyngeal muscle muscle sys post spiracle somatic muscle vent nerve cord
Muscle_system	sals	CG31374	1795	2259	956.51	91.4462	Set 1	3.3711	33.3845	flag_for_volker maternal no staining	faint ubiquitous no staining	faint ubiquitous no staining	faint ubiquitous no staining	faint ubiquitous no staining trunk mesoderm PR	dors prothoracic pharyngeal muscle garland cell muscle sys somatic muscle
Muscle_system	Mf	CG6803	2903	6610	1551.78	166.79	Set 1	3.2092	34.0196	cat_term:global_finito	list_4-6:no staining no staining	no staining	no staining	no staining	cat_term:global_finito muscle sys somatic muscle
Muscle_system	dpr10	CG32057	1479	1648	791.913	72.9723	Set 1	3.42028	32.9408	cat_term:global_finito no staining	no staining	no staining	no staining	no staining	no staining
Muscle_system	l(2)01289	CG9432	1997	2994	1049.23	102.118	Set 1	3.34696	33.5918	NA	NA	NA	NA	NA	NA
Muscle_system	tn	CG15105	1448	2155	777.174	73.9832	Set 1	3.3736	32.3999	NA	list_4-6:no staining no staining	list_7-8:no staining no staining	cat_term:finito9-10 no staining	no staining	cat_term:global_finito dors epidermis dors prothoracic pharyngeal muscle muscle sys somatic muscle vent epidermis
Muscle_system	CG8888	CG8888	1809	2474	956.119	88.4526	Set 1	3.41799	33.8469	cat_term:global_finito	list_4-6:no staining no staining	list_7-8:no staining no staining	cat_term:finito9-10 no staining	cat_term:finito11-12 corpus allatum PR no staining	cat_term:finito13-16 corpus allatum muscle sys ring gland somatic muscle
Muscle_system	CG34417	CG34417	5155	9579	2798.38	398.359	Set 1	2.80883	32.1637	NA	list_4-6:no staining no staining	list_7-8:no staining no staining	cat_term:finito9-10 no staining	no staining	cat_term:global_finito dors prothoracic pharyngeal muscle muscle sys somatic muscle
Neuron_unknown_1	Vmat	CG33528	1180	2306	5169.88	97.8308	Set 1	5.70902	70.4276	no staining	no staining	no staining	no staining	no staining	no staining
Neuron_unknown_1	SLO2	CG42732	571	972	2429.18	44.4493	Set 1	5.74007	64.5577	NA	NA	NA	NA	NA	NA
Neuron_unknown_1	DIP-eta	CG14010	233	289	945.665	12.9361	Set 1	6.08443	60.155	NA	NA	NA	NA	NA	NA
Neuron_unknown_1	CG1688	CG1688	103	166	468.816	6.94428	Set 1	5.88296	52.2169	no staining	no staining	no staining	no staining	no staining	no staining
Neuron_unknown_1	bma	CG34356	163	333	691.619	14.0715	Set 1	5.52008	52.087	NA	NA	NA	NA	NA	NA
Neuron_unknown_1	Ccn	CG32183	222	531	949.377	23.0544	Set 1	5.30261	52.4553	cat_term:global_finito no staining	no staining	no staining	no staining	no staining	no staining
Neuron_unknown_1	DIP-beta	CG42343	364	1052	1636.5	48.9704	Set 1	5.03339	53.7429	no staining	no staining	no staining	no staining	no staining	brain central brain glia central nervous sys lateral cord glia vent nerve cord
Neuron_unknown_1	Ca-alpha1T	CG15899	676	2590	2885.1	114.148	Set 1	4.64707	53.4176	NA	NA	NA	NA	NA	NA
Neuron_unknown_1	jus	CG14509	483	2129	2170.85	83.9054	Set 1	4.67626	51.835	cat_term:global_finito flag_for_volker maternal no staining	list_4-6:no staining no staining	list_7-8:no staining no staining	no staining	no staining	brain central nervous sys dors/lateral sensory complexes labral sensory complex vent midline vent midline glia vent nerve cord
Neuron_unknown_1	5-HT1A	CG16720	269	736	1141.89	34.3426	Set 1	5.01387	50.9333	cat_term:global_finito no staining	no staining	no staining	no staining	no staining	no staining
Neuron_unknown_1	Pdf	CG6496	37	4	166.345	0.0979125	Set 1	7.24327	53.5037	cat_term:global_finito no staining	list_4-6:no staining no staining	no staining	no staining	no staining	central nervous sys vent midline vent midline neuron vent nerve cord
Neuron_unknown_1	dpr21	CG42596	284	802	1200.29	38.0775	Set 1	4.9409	50.5473	NA	NA	NA	NA	NA	NA
Neuron_unknown_1	CG31690	CG31690	359	1536	1651.79	72.2808	Set 1	4.49445	48.0488	no staining	no staining	no staining	no staining	no staining	no staining
Neuron_unknown_1	nAChRalpha6	CG4128	933	4879	3894.47	221.951	Set 1	4.12663	49.2207	no staining	no staining	no staining	no staining	no staining	no staining
Neuron_unknown_1	nAChRalpha5	CG32975	465	2130	1946.23	95.1868	Set 1	4.3387	47.4099	NA	NA	NA	NA	NA	NA
Neuron_unknown_1	Rim	CG33547	1058	7164	4540.93	331.977	Set 1	3.76949	45.7959	cat_term:global_finito no staining	no staining	no staining	no staining	no staining	no staining
Neuron_unknown_1	CG45002	CG45002	360	1602	1524.3	71.4157	Set 1	4.3957	46.4841	cat_term:global_finito no staining	no staining	no staining	no staining	no staining	no staining
Neuron_unknown_1	dpr13	CG33996	298	1062	1253.1	49.2454	Set 1	4.64037	47.7608	flag_for_volker no staining	no staining	no staining	no staining	no staining	brain dors/lateral sensory complexes vent midline vent nerve cord vent sensory complex PR
Neuron_unknown_1	unc-13-4A	CG32381	204	1001	952.942	42.2321	Set 1	4.46221	44.1659	no staining	no staining	no staining	no staining	no staining	no staining
Neuron_unknown_1	rad	CG44424	373	1901	1563.72	83.3759	Set 1	4.21201	44.6966	NA	NA	NA	NA	NA	NA
Neuron_unknown_2	CG14566	CG14566	518	60	3985.54	1.67309	Set 1	10.542	126.093	NA	NA	NA	NA	NA	NA
Neuron_unknown_2	CG11370	CG11370	3708	446	15737.3	17.5042	Set 1	9.73211	135.685	cat_term:global_finito	list_4-6:no staining no staining	list_7-8:no staining no staining	cat_term:finito9-10 no staining	dors trunk SA midline PR	dors trunk post spiracle tracheal sys vent midline
Neuron_unknown_2	Nplp4	CG15361	585	98	3518.48	1.42737	Set 1	10.5013	123.718	NA	NA	NA	NA	NA	NA
Neuron_unknown_2	CG11413	CG11413	908	67	3428.04	2.9631	Set 1	9.75654	114.577	cat_term:global_finito no staining	no staining	no staining	no staining	no staining	no staining
Neuron_unknown_2	CG13067	CG13067	496	99	2365.33	3.54593	Set 1	9.02325	101.136	flag_for_volker no staining	no staining	no staining	no staining	no staining	salivary gland duct tracheal sys
Neuron_unknown_2	CG8012	CG8012	225	8	1147.28	0.247493	Set 1	9.84497	100.077	cat_term:global_finito no staining	no staining	no staining	no staining	no staining	no staining
Neuron_unknown_2	CG13678	CG13678	376	164	2194.11	6.24113	Set 1	8.2432	91.5002	no staining	no staining	no staining	no staining	no staining	cat_term:global_finito tracheal sys
Neuron_unknown_2	CG13044	CG13044	714	315	2659.67	9.77114	Set 1	7.94793	90.4282	no staining	no staining	no staining	no staining	no staining	no staining
Neuron_unknown_2	CG8630	CG8630	490	373	2449.28	10.5506	Set 1	7.72825	87.0102	cat_term:global_finito	list_4-6:no staining no staining	no staining	no staining	no staining	proventriculus ring gland salivary gland common duct salivary gland duct
Neuron_unknown_2	CG14569	CG14569	270	53	1229.31	2.2818	Set 1	8.54915	87.7554	cat_term:global_finito no staining	list_4-6:no staining no staining	list_7-8:no staining no staining	no staining	no staining post spiracle SA	no staining post spiracle
Neuron_unknown_2	Cpr49Ag	CG8511	248	226	1690.76	8.43647	Set 1	7.48521	80.2737	no staining	no staining	no staining	no staining	no staining	esophagus hindgut post spiracle proventriculus
Neuron_unknown_2	CAH9	CG6074	81	38	500.021	1.49245	Set 1	7.64828	68.5953	no staining	no staining	no staining	no staining	no staining	no staining
Neuron_unknown_2	CG14572	CG14572	112	81	627.491	2.94294	Set 1	7.31418	67.9908	cat_term:global_finito no staining	no staining	no staining	no staining	no staining	no staining
Neuron_unknown_2	CG11852	CG11852	150	161	823.748	4.24043	Set 1	7.29638	70.6859	cat_term:global_finito no staining	no staining	no staining	no staining	no staining	no staining
Neuron_unknown_2	CG5162	CG5162	66	18	296.999	0.656271	Set 1	7.48637	61.5317	cat_term:global_finito maternal no staining	no staining	no staining	no staining	no staining	no staining
Neuron_unknown_2	CG9812	CG9812	243	555	1236.16	24.6368	Set 1	5.5915	57.4404	cat_term:global_finito	list_4-6:no staining no staining	no staining	no staining	no staining	dors trunk tracheal sys visceral branch
Neuron_unknown_2	bond	CG6921	196	583	905.101	26.1619	Set 1	5.05842	49.6915	cat_term:global_finito	list_4-6:no staining no staining	list_7-8:no staining no staining	cat_term:finito9-10 dors ectoderm PR no staining	corpus allatum PR dors epidermis PR large intestine SA salivary duct PR	corpus allatum dors apodeme foregut hindgut large intestine oenocyte proventriculus proventriculus intermediate layer salivary gland duct
Neuron_unknown_2	Cpr12A	CG15757	30	25	175.632	0.692225	Set 1	6.69749	49.9941	cat_term:global_finito no staining	no staining	no staining	no staining	no staining	sensory sys head vent imaginal precursor
Neuron_unknown_2	CAH2	CG6906	145	846	1027.23	31.6924	Set 1	4.97366	49.7662	maternal	no staining	no staining	no staining	no staining	NA
Neuron_unknown_2	CG17190	CG17190	11	10	119.986	0.199339	Set 1	6.64448	45.9711	NA	NA	NA	NA	NA	NA
Oenocytes	FASN3	CG17374	963	1254	19545.8	38.1039	Set 1	8.96533	127.798	NA	NA	NA	NA	NA	NA
Oenocytes	LpR1	CG31094	406	995	8019.82	44.2245	Set 1	7.47032	96.8866	cat_term:global_finito maternal	list_4-6:ubiquitous maternal	no staining	no staining	cat_term:finito11-12 no staining	brain cat_term:finito13-16 central nervous sys oenocyte vent nerve cord
Oenocytes	CG17562	CG17562	58	52	1204.21	2.16585	Set 1	8.57128	87.7277	cat_term:global_finito no staining	list_4-6:no staining no staining	list_7-8:no staining no staining	no staining	no staining	no staining oenocyte
Oenocytes	Cyp4g1	CG3972	277	1823	5495.22	49.3063	Set 1	6.77129	84.1281	no staining	list_4-6:no staining no staining	list_7-8:no staining no staining	no staining	no staining	cat_term:global_finito no staining oenocyte
Oenocytes	CG7910	CG7910	48	121	934.646	3.28658	Set 1	7.76845	76.6732	cat_term:global_finito no staining	no staining	no staining	no staining	no staining	no staining
Oenocytes	CG12256	CG12256	46	93	905.107	3.29439	Set 1	7.71949	75.8327	NA	NA	NA	NA	NA	NA
Oenocytes	CG18609	CG18609	48	61	875.651	1.69501	Set 1	8.34392	81.569	NA	list_4-6:no staining no staining	no staining	no staining	no staining	cat_term:global_finito oenocyte
Oenocytes	CG17560	CG17560	41	127	845.182	3.31144	Set 1	7.61495	74.054	NA	NA	NA	NA	NA	NA
Oenocytes	CG15531	CG15531	29	125	551.883	2.70105	Set 1	7.22028	65.7828	NA	NA	NA	NA	NA	NA
Oenocytes	CG31832	CG31832	14	12	254.723	0.380078	Set 1	7.52804	60.2125	NA	NA	NA	NA	NA	NA
Oenocytes	FarO	CG18031	20	116	412.809	4.37624	Set 1	6.26273	54.4408	cat_term:global_finito no staining	list_4-6:no staining no staining	list_7-8:no staining no staining	no staining	no staining	oenocyte
Oenocytes	bond	CG6921	39	525	834.728	21.4441	Set 1	5.2169	50.6398	cat_term:global_finito	list_4-6:no staining no staining	list_7-8:no staining no staining	cat_term:finito9-10 dors ectoderm PR no staining	corpus allatum PR dors epidermis PR large intestine SA salivary duct PR	corpus allatum dors apodeme foregut hindgut large intestine oenocyte proventriculus proventriculus intermediate layer salivary gland duct
Oenocytes	CG4020	CG4020	9	103	182.389	2.37512	Set 1	5.75594	43.2775	NA	NA	NA	NA	NA	NA
Oenocytes	Hnf4	CG9310	96	3069	2039.24	133.169	Set 1	3.92591	43.1635	cat_term:global_finito maternal ubiquitous	apically cleared no staining strong ubiquitous ubiquitous	faint ubiquitous ubiquitous	no staining ubiquitous	ant midgut PR foregut PR hindgut proper PR post midgut PR ubiquitous	foregut hindgut midgut oenocyte ubiquitous
Oenocytes	Lst	CG8317	10	188	230.221	7.82107	Set 1	4.70592	36.9562	cat_term:global_finito no staining	no staining	no staining	no staining	no staining	no staining
Oenocytes	CG8534	CG8534	8	15	154.015	0.261925	Set 1	6.9313	50.434	NA	NA	NA	NA	NA	NA
Oenocytes	prc	CG5700	78	2525	1439.57	91.8008	Set 1	3.95536	41.5013	no staining	list_4-6:no staining no staining	no staining	cat_term:finito9-10 no staining	no staining	cat_term:global_finito central brain surface glia dors epidermis dors imaginal precursor dors vessel head epidermis lateral cord surface glia oenocyte pericardial cell plasmatocytes vent midline
Oenocytes	CG4860	CG4860	6	67	100.652	1.93102	Set 1	5.10183	34.0164	cat_term:finito1-3 cat_term:global_finito maternal no staining	cat_term:finito4-6 list_4-6:no staining no staining	cat_term:finito7-8 no staining	cat_term:finito9-10 no staining	cat_term:finito11-12 no staining	cat_term:finito13-16 no staining oenocyte
Oenocytes	Obp58c	CG13524	2	8	56.5643	0.149644	Set 1	5.62063	32.8644	NA	NA	NA	NA	NA	NA
Oenocytes	FASN2	CG3524	4	108	96.6267	2.55527	Set 1	4.76439	31.4888	NA	NA	NA	NA	NA	NA
Oenocytes_LS	CG13545	CG13545	909	91	3030.85	3.60985	Set 1	9.36079	108.267	NA	NA	NA	NA	NA	NA
Oenocytes_LS	Cyp4g1	CG3972	2999	1009	10146.8	39.3122	Set 1	7.97559	106.146	no staining	list_4-6:no staining no staining	list_7-8:no staining no staining	no staining	no staining	cat_term:global_finito no staining oenocyte
Oenocytes_LS	FASN3	CG17374	3078	960	10394	43.1288	Set 1	7.87981	105.145	NA	NA	NA	NA	NA	NA
Oenocytes_LS	CG11131	CG11131	265	213	1920.93	8.62908	Set 1	7.64019	83.3418	cat_term:global_finito no staining	no staining	no staining	no staining	no staining	no staining
Oenocytes_LS	CG14565	CG14565	115	66	710.248	2.18781	Set 1	7.79961	73.8952	NA	NA	NA	NA	NA	NA
Oenocytes_LS	CG7203	CG7203	221	54	955.608	2.25903	Set 1	8.19583	81.1534	NA	NA	NA	NA	NA	NA
Oenocytes_LS	Cpr31A	CG33302	261	112	1345.83	4.41683	Set 1	7.95683	82.714	cat_term:global_finito no staining	no staining	no staining	no staining	no staining	no staining
Oenocytes_LS	CG13044	CG13044	461	342	2080.43	10.3588	Set 1	7.51692	82.8618	no staining	no staining	no staining	no staining	no staining	no staining
Oenocytes_LS	FASN2	CG3524	307	40	1002.95	1.45227	Set 1	8.67592	86.5117	NA	NA	NA	NA	NA	NA
Oenocytes_LS	CG15531	CG15531	368	75	1096.3	2.38197	Set 1	8.34056	84.2375	NA	NA	NA	NA	NA	NA
Oenocytes_LS	lectin-22C	CG42295	262	6	650.51	0.192467	Set 1	9.09148	84.9839	no staining	no staining	no staining	no staining	no staining	no staining
Oenocytes_LS	CG6432	CG6432	231	5	580.731	0.135447	Set 1	8.99847	82.6438	NA	NA	NA	NA	NA	NA
Oenocytes_LS	Obp56h	CG13874	165	34	538.324	1.56153	Set 1	7.71533	70.0167	flag_for_volker no staining	no staining	no staining	no staining	no staining	antennal sense organ Bolwig's organ labral sensory complex
Oenocytes_LS	Ccp84Ab	CG1252	148	121	723.856	3.92523	Set 1	7.19937	68.4051	no staining	no staining	no staining	no staining	no staining	cat_term:global_finito tracheal sys
Oenocytes_LS	CG16904	CG16904	122	0	397.389	0	Set 1	8.63441	74.5843	cat_term:global_finito no staining	no staining	no staining	no staining	no staining	no staining
Oenocytes_LS	Obp49a	CG30052	243	24	446.88	0.868232	Set 1	7.90207	69.5933	cat_term:global_finito no staining	no staining	no staining	no staining	no staining	no staining
Oenocytes_LS	CG17560	CG17560	269	58	813.494	2.55578	Set 1	7.83782	75.7899	NA	NA	NA	NA	NA	NA
Oenocytes_LS	Nplp4	CG15361	280	177	563.199	4.86708	Set 1	6.58486	60.186	NA	NA	NA	NA	NA	NA
Oenocytes_LS	CG18609	CG18609	106	43	450.062	2.11345	Set 1	7.17547	63.2674	NA	list_4-6:no staining no staining	no staining	no staining	no staining	cat_term:global_finito oenocyte
Oenocytes_LS	CG7910	CG7910	173	87	548.111	3.46905	Set 1	6.93836	63.1457	cat_term:global_finito no staining	no staining	no staining	no staining	no staining	no staining
Olfactory_neurons	pdm3	CG42698	2957	1476	4485.09	63.2818	Set 1	6.12458	74.2988	cat_term:global_finito maternal no staining	faint ubiquitous no staining	faint ubiquitous no staining	faint ubiquitous no staining	brain PR no staining ring gland PR	brain no staining ring gland sensory sys head vent nerve cord
Olfactory_neurons	CG11635	CG11635	222	60	341.146	2.61855	Set 1	6.55883	55.2153	no staining	no staining	no staining	NA	lymph gland SA	lymph gland vent nerve cord
Olfactory_neurons	Drgx	CG34340	554	646	835.57	28.1352	Set 1	4.84192	47.0071	maternal	faint ubiquitous list_4-6:no staining	no staining	no staining	brain PR vent nerve cord PR	brain cat_term:global_finito central brain glia lateral cord glia vent nerve cord
Olfactory_neurons	fipi	CG15630	1329	2297	1914.16	108.4	Set 1	4.12903	45.0199	no staining	no staining	no staining	no staining	no staining	amnioserosa
Olfactory_neurons	CG43778	CG43778	276	276	336.27	10.4599	Set 1	4.87495	40.9387	maternal	ubiquitous	ubiquitous	ubiquitous	ubiquitous	ubiquitous
Olfactory_neurons	CG11670	CG11670	140	121	209.333	4.5839	Set 1	5.22838	40.345	no staining	list_4-6:no staining no staining	no staining	cat_term:finito9-10 no staining	no staining	cat_term:global_finito central brain surface glia lateral cord surface glia tracheal sys
Olfactory_neurons	CG32032	CG32032	261	380	385.835	14.2804	Set 1	4.65823	40.0402	NA	NA	NA	NA	NA	NA
Olfactory_neurons	Ntan1	CG5473	1075	3337	1617.63	147.627	Set 1	3.44412	36.7162	cat_term:global_finito no staining	no staining	no staining	no staining	no staining	no staining
Olfactory_neurons	zyd	CG2893	475	1137	717.068	48.5972	Set 1	3.85378	36.5646	cat_term:global_finito maternal	no staining	no staining	no staining	no staining	brain central brain glia central brain surface glia central nervous sys lateral cord glia lateral cord neuron vent midline vent nerve cord
Olfactory_neurons	luna	CG33473	6791	32554	10062.8	1459.66	Set 1	2.78433	37.0229	maternal	faint ubiquitous	faint ubiquitous	faint ubiquitous	ubiquitous	anal pad ubiquitous
Olfactory_neurons	moody	CG4322	666	1807	989.988	76.7302	Set 1	3.67086	36.5351	cat_term:global_finito	list_4-6:no staining no staining	list_7-8:specific no staining	ant endoderm PR crystal cell SA head mesoderm PR post endoderm PR	ant midgut PR central brain plasmatocytes A post midgut PR	brain central brain central brain glia central brain neuron central brain surface glia central nervous sys lateral cord lateral cord glia lateral cord neuron lateral cord surface glia midgut vent nerve cord
Olfactory_neurons	prc	CG5700	761	2236	1155.68	88.9989	Set 1	3.68269	37.4742	no staining	list_4-6:no staining no staining	no staining	cat_term:finito9-10 no staining	no staining	cat_term:global_finito central brain surface glia dors epidermis dors imaginal precursor dors vessel head epidermis lateral cord surface glia oenocyte pericardial cell plasmatocytes vent midline
Olfactory_neurons	CG9336	CG9336	550	1500	837.14	61.7765	Set 1	3.73717	36.2919	no staining	list_4-6:no staining no staining	list_7-8:no staining no staining	cat_term:finito9-10 no staining	cardiac mesoderm PR dors vessel SA midline PR tracheal PR	Bolwig's organ cat_term:global_finito circulatory sys dors vessel dors/lateral sensory complexes gonad head epidermis sensory sys head tracheal sys vent midline vent sensory complex PR
Olfactory_neurons	Timp	CG6281	358	932	542.127	38.3848	Set 1	3.78292	34.3684	cat_term:global_finito	list_4-6:no staining no staining	list_7-8:no staining no staining	no staining	no staining	atrium dors vessel labial sensory complex
Olfactory_neurons	CG3168	CG3168	467	2900	726.104	66.7459	Set 1	3.42197	32.5293	cat_term:global_finito	list_4-6:no staining no staining	no staining	amnioserosa no staining	no staining yolk nuclei	amnioserosa brain central brain glia central brain surface glia central nervous sys hindgut lateral cord glia Malpighian tubule Malpighian tubule tip cell vent midline vent nerve cord yolk nuclei
Olfactory_neurons	CG10702	CG10702	178	448	271.329	17.4403	Set 1	3.87911	31.379	cat_term:global_finito maternal	cellular blastoderm list_4-6:ubiquitous maternal	head mesoderm PR list_7-8:ubiquitous trunk mesoderm PR ubiquitous	head mesoderm PR trunk mesoderm PR	cat_term:finito11-12 hindgut proper PR visceral muscle PR	cat_term:any_neural cat_term:subset_CNS central brain surface glia lateral cord surface glia sensory sys head visceral muscle
Olfactory_neurons	Sur	CG5772	224	512	344.693	20.642	Set 1	3.99341	33.6778	cat_term:global_finito	list_4-6:no staining no staining	list_7-8:no staining no staining	no staining	dors vessel SA	circulatory sys dors vessel
Olfactory_neurons	Pvf2	CG13780	365	918	536.318	42.6317	Set 1	3.61964	32.8288	cat_term:global_finito	list_4-6:no staining no staining	list_7-8:no staining no staining	no staining	cardiac mesoderm PR foregut PR Malpighian tubule PR midline PR	circulatory sys foregut leading edge cell Malpighian tubule ring gland salivary gland duct stomatogastric nervous sys vent midline
Olfactory_neurons	pain	CG15860	264	715	387.045	30.8621	Set 1	3.60259	30.9825	no staining	no staining	no staining	no staining	no staining	no staining
Olfactory_neurons	trol	CG33950	7350	44510	11007.6	2110.02	Set 1	2.38248	31.988	cat_term:global_finito no staining	list_4-6:no staining no staining	list_7-8:no staining no staining	no staining	germ cell no staining	circulatory sys dors epidermis dors vessel epipharynx foregut sensory structure hypopharynx lateral cord lateral cord glia lymph gland midgut muscle sys no staining proventriculus proventriculus inner layer proventriculus intermediate layer proventriculus outer layer ring gland somatic muscle vent midline vent nerve cord
Peptidergic_neuron	CG4577	CG4577	161	107	2804.59	4.42511	Set 1	9.01392	103.246	cat_term:global_finito no staining	no staining	no staining	no staining	no staining	no staining
Peptidergic_neuron	CG42541	CG42541	373	1413	7229.57	60.6988	Set 1	6.87252	88.105	cat_term:global_finito no staining	no staining	no staining	no staining	no staining	no staining
Peptidergic_neuron	CG34386	CG34386	27	23	574.27	1.02169	Set 1	8.15002	74.7202	NA	NA	NA	NA	NA	NA
Peptidergic_neuron	AstA	CG13633	50	127	1042.25	5.52694	Set 1	7.31909	73.3875	cat_term:global_finito	list_4-6:no staining no staining	no staining	no staining	no staining	central brain central nervous sys lateral cord tracheal sys vent epidermis vent nerve cord
Peptidergic_neuron	Nplp1	CG3441	46	235	1124.09	10.7639	Set 1	6.57824	66.6759	cat_term:global_finito	list_4-6:no staining no staining	list_7-8:no staining no staining	no staining	no staining	central brain neuron central nervous sys lateral cord neuron vent nerve cord
Peptidergic_neuron	AstC	CG14919	62	16	558.2	0.670223	Set 1	8.3846	76.5281	cat_term:global_finito no staining	no staining	no staining	no staining	no staining	brain central brain neuron midgut midgut chamber
Peptidergic_neuron	MsR1	CG8985	48	172	981.036	7.80693	Set 1	6.79952	67.5848	NA	NA	NA	NA	NA	NA
Peptidergic_neuron	Mip	CG6456	40	200	917.722	6.68752	Set 1	6.8994	67.9141	NA	list_4-6:no staining no staining	list_7-8:no staining no staining	no staining	no staining	cat_term:global_finito midgut vent nerve cord
Peptidergic_neuron	Tk	CG14734	28	70	525.925	2.97611	Set 1	7.04736	63.7183	cat_term:global_finito no staining	no staining	no staining	no staining	no staining	no staining
Peptidergic_neuron	Mmp2	CG1794	564	10019	10658.7	463.359	Set 1	4.52065	60.4857	NA	NA	NA	NA	NA	NA
Peptidergic_neuron	Pal2	CG5472	53	204	674.768	8.97088	Set 1	6.08053	57.1593	cat_term:global_finito no staining	no staining	no staining	no staining	no staining	adult midgut precursor central brain neuron head epidermis ring gland
Peptidergic_neuron	IA-2	CG31795	396	2179	2763.09	79.4946	Set 1	5.10124	58.3204	NA	NA	NA	NA	NA	NA
Peptidergic_neuron	CG15537	CG15537	26	66	388.304	3.09888	Set 1	6.56581	56.4972	NA	NA	NA	NA	NA	NA
Peptidergic_neuron	amon	CG6438	55	404	1038.04	17.1202	Set 1	5.84013	58.5241	cat_term:global_finito no staining	list_4-6:no staining no staining	list_7-8:no staining no staining	no staining	no staining	brain central brain neuron lateral cord glia lateral cord neuron midgut no staining ring gland sensory sys head vent nerve cord
Peptidergic_neuron	Cyp9h1	CG17577	7	22	179.306	0.570789	Set 1	6.83479	51.222	NA	NA	NA	NA	NA	NA
Peptidergic_neuron	CG13229	CG13229	37	274	521.218	10.8781	Set 1	5.45551	49.2551	cat_term:global_finito no staining	no staining	no staining	no staining	no staining	no staining
Peptidergic_neuron	Ms	CG6440	13	19	298.162	0.860923	Set 1	7.32393	60.2378	cat_term:global_finito	list_4-6:no staining no staining	list_7-8:no staining no staining	no staining	no staining	central brain neuron lateral cord neuron
Peptidergic_neuron	Eh	CG5400	8	9	161.731	0.44392	Set 1	6.80747	50.01	no staining	no staining	no staining	no staining	no staining	central brain neuron
Peptidergic_neuron	CG7497	CG7497	12	38	243.121	1.37186	Set 1	6.67951	52.9783	cat_term:global_finito no staining	no staining	no staining	no staining	no staining	no staining
Peptidergic_neuron	Ac78C	CG10564	45	525	805.885	22.783	Set 1	5.08257	49.0784	cat_term:finito1-3 cat_term:global_finito no staining	AISN cat_term:finito4-6 gap list_4-6:specific subset ubiquitous	cat_term:finito7-8 dors ectoderm PR gap list_7-8:specific procephalic ectoderm A vent ectoderm PR	cat_term:finito9-10 no staining	cat_term:finito11-12 no staining	cat_term:finito13-16 hindgut large intestine
Peripheral_nervous_system_PR	nrm	CG43079	8543	4453	6092.12	176.155	Set 1	5.10386	64.1706	NA	NA	NA	NA	NA	NA
Peripheral_nervous_system_PR	meru	CG32150	2869	1325	2051.97	53.352	Set 1	5.23854	57.6422	no staining	no staining	no staining	no staining	no staining	no staining
Peripheral_nervous_system_PR	sv	CG11049	3872	1976	2696.4	81.3834	Set 1	5.03254	57.3576	cat_term:global_finito no staining	no staining	no staining	no staining	antennal PR1 dors epidermis PR dors/lateral sensory complexes PR labial sensory complex PR labral sensory complex PR maxillary sensory complex PR sensory nervous sys SA vent sensory complex SA	antennal sense organ dors/lateral sensory complexes labial sensory complex labral sensory complex maxillary sensory complex sensory nervous sys PR vent sensory complex PR
Peripheral_nervous_system_PR	ss	CG6993	2146	2062	1572.8	89.2363	Set 1	4.12349	43.7916	cat_term:global_finito maternal	no staining rapidly degraded	antennal PR A no staining	antennal PR2 no staining	antennal PR1 dors/lateral sensory complexes PR labial sensory complex PR maxillary sensory complex PR vent sensory complex SA	antennal sense organ dors/lateral sensory complexes head epidermis vent labial sensory complex labral sensory complex maxillary sensory complex sensory sys head vent sensory complex PR
Peripheral_nervous_system_PR	sens	CG32120	1188	947	827.681	38.6095	Set 1	4.38516	42.5127	cat_term:global_finito no staining	no staining	no staining	antennal PR2 clypeolabrum PR dors ectoderm PR no staining visual PR	(larval eye PR) antennal PR1 dors/lateral sensory complexes PR hypopharyngeal sense organ PR labial sensory complex PR labral sensory complex PR maxillary sensory complex PR no staining salivary gland PR vent sensory complex SA	dors/lateral sensory complexes no staining salivary gland sensory sys head vent sensory complex PR
Peripheral_nervous_system_PR	sca	CG17579	2587	4975	1777.74	205.701	Set 1	3.10442	33.5173	no staining	no staining	no staining	no staining	no staining	no staining
Peripheral_nervous_system_PR	cpo	CG43738	12574	38521	9004.66	1631.73	Set 1	2.46339	32.3606	cat_term:global_finito no staining	list_4-6:no staining no staining	no staining	cat_term:finito9-10 no staining	dors/lateral sensory complexes PR labial sensory complex PR maxillary sensory complex PR no staining sensory nervous sys SA vent sensory complex SA	antennal sense organ dors/lateral sensory complexes foregut sensory structure head epidermis labial sensory complex maxillary sensory complex no staining ring gland sensory nervous sys PR sensory sys head
Peripheral_nervous_system_PR	pb	CG31481	903	1502	638.712	63.4913	Set 1	3.30799	30.8347	no staining	no staining	no staining	gnathal lobes A	labial sensory complex PR maxillary sensory complex PR visceral muscle PR	esophageal ganglion labial sensory complex maxillary sensory complex vent nerve cord visceral muscle
Peripheral_nervous_system_PR	Rfx	CG6312	837	1394	607.023	56.2122	Set 1	3.40736	31.5112	cat_term:global_finito maternal no staining	cat_term:global_finito no staining	cat_term:global_finito no staining	cat_term:global_finito no staining	antennal PR1 brain PR cat_term:global_finito dors/lateral sensory complexes PR labial sensory complex PR labral sensory complex PR maxillary sensory complex PR no staining optic lobe PR vent sensory complex SA	brain cat_term:global_finito dors epidermis dors/lateral sensory complexes optic lobe post spiracle sensory sys head vent sensory complex PR
Peripheral_nervous_system_PR	loco	CG5248	3114	8177	2193.62	352.404	Set 1	2.63393	29.236	cat_term:global_finito flag_for_volker maternal	cellular blastoderm list_4-6:no staining list_4-6:ubiquitous ubiquitous	list_7-8:ubiquitous ubiquitous	ubiquitous	amnioserosa antennal PR1 central brain neuron dors/lateral sensory complexes PR faint ubiquitous head epidermis PR P1 labial sensory complex PR maxillary sensory complex PR sensory nervous sys SA tracheal PR vent epidermis PR vent sensory complex SA	dors epidermis dors trunk faint ubiquitous leading edge cell sensory nervous sys PR sensory sys head tracheal sys yolk nuclei
Peripheral_nervous_system_PR	vn	CG10491	2878	8302	2026.88	349.072	Set 1	2.53353	27.8328	no staining	ectoderm AISN	vent nerve cord A	vent nerve cord PR P3	labral sensory complex PR neuroblasts of vent nervous sys vent nerve cord PR	neuroblasts of vent nervous sys vent nerve cord
Peripheral_nervous_system_PR	fd3F	CG44123	105	69	77.9589	2.90386	Set 1	4.31974	27.2274	maternal	faint ubiquitous	faint ubiquitous	faint ubiquitous	faint ubiquitous	faint ubiquitous
Peripheral_nervous_system_PR	ct	CG11387	6956	26798	5001.46	1175.41	Set 1	2.08796	25.6577	cat_term:global_finito flag_for_volker no staining	list_4-6:no staining no staining	hindgut A list_7-8:specific	inclusive hindgut PR main segment of Malpighian tubule SA Malpighian tubule A mesectoderm PR	hindgut proper PR Malpighian tubule main body PR Malpighian tubule PR midline PR post spiracle SA sensory nervous sys SA	ant spiracle antennal sense organ brain central nervous sys dors/lateral sensory complexes faint ubiquitous Malpighian tubule post spiracle sensory nervous sys PR sensory sys head tracheal sys vent midline vent nerve cord vent sensory complex PR
Peripheral_nervous_system_PR	beat-IIIc	CG15138	4746	16291	3405.53	733.723	Set 1	2.21261	25.9629	cat_term:global_finito flag_for_volker	list_4-6:specific yolk nuclei	list_7-8:specific yolk nuclei	dors ectoderm PR trunk mesoderm PR yolk nuclei	ant midgut PR cat_term:finito11-12 dors epidermis PR fat body/gonad PR head mesoderm PR leading edge cell SA post midgut PR trunk mesoderm PR vent nerve cord PR	apoptotic amnioserosa brain central brain neuron dors vessel fat body lateral cord neuron midgut vent nerve cord
Peripheral_nervous_system_PR	Dll	CG3629	529	1189	380.511	47.5402	Set 1	2.97069	25.4753	cat_term:global_finito maternal no staining	central brain AISN faint ubiquitous head epidermis dors AISN no staining procephalic ectoderm AISN visual AISN	antennal PR A central brain A clypeolabrum A head epidermis dors A head epidermis lateral A no staining visual A	antennal PR2 central brain PR P3 clypeolabrum PR head epidermis dors PR head epidermis lateral PR no staining visual PR	(larval eye PR) antennal PR1 brain PR clypeo-labral PR head epidermis PR P1 labial sensory complex PR maxillary sensory complex PR no staining vent imaginal precursor SA	brain head epidermis no staining sensory sys head vent imaginal precursor vent nerve cord
Peripheral_nervous_system_PR	unc	CG1501	85	67	65.1362	2.41721	Set 1	4.25257	25.7168	NA	NA	NA	NA	NA	NA
Peripheral_nervous_system_PR	Notum	CG13076	1393	4093	962.858	172.996	Set 1	2.46827	24.4671	NA	NA	NA	NA	NA	NA
Peripheral_nervous_system_PR	spdo	CG31020	549	1435	399.794	55.8694	Set 1	2.81353	24.3278	cat_term:global_finito maternal	AISN dors ectoderm AISN ectoderm AISN endoderm AISN head mesoderm AISN hindgut AISN list_4-6:specific mesectoderm AISN mesoderm AISN procephalic ectoderm AISN subset ubiquitous vent ectoderm AISN	ant endoderm A dors ectoderm PR head mesoderm PR list_7-8:specific mesectoderm PR post endoderm PR trunk mesoderm PR vent ectoderm PR vent nerve cord A	ant endoderm PR head mesoderm PR inclusive hindgut PR mesectoderm PR post endoderm PR trunk mesoderm PR vent ectoderm PR vent nerve cord PR P3	hindgut proper PR midline PR vent epidermis PR	brain cat_term:any_neural cat_term:PNS dors epidermis dors/lateral sensory complexes foregut head epidermis hindgut lateral cord glia midgut muscle sys sensory nervous sys PR sensory sys head vent epidermis vent nerve cord vent sensory complex PR visceral muscle
Peripheral_nervous_system_PR	Traf4	CG3048	2033	7004	1425.37	286.739	Set 1	2.3085	24.1888	cat_term:global_finito	AISN hindgut AISN list_4-6:specific mesoderm AISN subset trunk mesoderm AISN vent ectoderm AISN yolk yolk nuclei	dors ectoderm PR list_7-8:specific trunk mesoderm PR vent ectoderm PR yolk nuclei	dors ectoderm PR head mesoderm PR procephalic ectoderm PR trunk mesoderm PR vent ectoderm PR vent nerve cord PR P3	brain PR central brain glia central brain neuron ganglion mother cell lateral cord glia lateral cord neuron neuroblasts of vent nervous sys procephalic neuroblasts sensory nervous sys SA stomatogastric nervous sys PR vent nerve cord PR	brain cat_term:any_neural cat_term:PNS cat_term:subset_CNS central brain glia central brain neuron central nervous sys lateral cord glia lateral cord neuron ring gland sensory nervous sys PR sensory sys head stomatogastric nervous sys vent nerve cord
Peripheral_nervous_system_PR	neur	CG11988	2373	8992	1664.15	378.297	Set 1	2.13339	22.8303	cat_term:global_finito maternal no staining	cellular blastoderm dors ectoderm AISN list_4-6:specific mesectoderm AISN mesoderm AISN no staining procephalic ectoderm AISN subset vent ectoderm AISN	ant endoderm A foregut A head mesoderm PR list_7-8:specific mesectoderm PR no staining post endoderm PR procephalic ectoderm A trunk mesoderm PR vent ectoderm PR vent nerve cord A	mesectoderm PR no staining procephalic ectoderm PR vent nerve cord PR P3 visual PR	brain PR central brain glia central brain neuron ganglion mother cell germ cell lateral cord glia lateral cord neuron neuroblasts of vent nervous sys no staining optic lobe PR sensory nervous sys SA stomatogastric nervous sys PR vent nerve cord PR vent sensory complex SA	brain cat_term:any_neural cat_term:pan_CNS central brain glia central brain neuron central brain surface glia central nervous sys gonad lateral cord glia lateral cord neuron lateral cord surface glia no staining sensory nervous sys PR stomatogastric nervous sys vent nerve cord vent sensory complex PR
Pharynx	dy	CG9355	3921	1840	6033.85	80.1826	Set 1	6.21577	78.0644	flag_for_volker no staining	no staining	no staining	no staining	no staining salivary gland PR	epipharynx esophagus no staining rectum salivary gland duct
Pharynx	TwdlT	CG5812	2034	1268	2994.41	47.8904	Set 1	5.93658	68.5588	cat_term:global_finito maternal	cellular blastoderm list_4-6:ubiquitous maternal	list_7-8:ubiquitous no staining	no staining	vent nerve cord PR	atrium head epidermis hypopharynx lateral cord neuron post spiracle vent nerve cord
Pharynx	CAH6	CG3669	223	43	339.913	1.90182	Set 1	6.87207	57.8165	NA	NA	NA	NA	NA	NA
Pharynx	CG8568	CG8568	327	112	468.205	3.20967	Set 1	6.79729	60.3196	cat_term:global_finito	list_4-6:no staining no staining	list_7-8:no staining no staining	cat_term:finito9-10 no staining	no staining	dors trunk head epidermis head epidermis dors hypopharynx post spiracle sensory sys head vent epidermis
Pharynx	jv	CG32397	968	887	1458.3	37.419	Set 1	5.24633	55.1445	NA	NA	NA	NA	NA	NA
Pharynx	CG42331	CG42331	2111	2410	3235.01	110.659	Set 1	4.8566	56.6279	cat_term:global_finito	list_4-6:no staining no staining	no staining	cat_term:finito9-10 no staining	no staining	anal pad dors epidermis esophagus head epidermis hypopharynx post spiracle vent epidermis
Pharynx	Muc91C	CG7709	1812	2536	2736.03	91.4373	Set 1	4.88746	55.807	NA	NA	NA	NA	NA	NA
Pharynx	Cpr23B	CG2973	215	61	275.877	2.03866	Set 1	6.50445	52.7712	cat_term:global_finito	no staining	list_7-8:no staining no staining	cat_term:finito9-10 no staining	no staining	hypopharynx proventriculus
Pharynx	CG31176	CG31176	2011	2673	2992.15	121.136	Set 1	4.61462	53.2871	no staining	no staining	no staining	no staining	no staining	no staining
Pharynx	CG14880	CG14880	413	377	613.144	14.8335	Set 1	5.27517	48.861	NA	NA	NA	NA	NA	NA
Pharynx	ImpE1	CG32356	4993	10908	7515.38	510.26	Set 1	3.87772	49.9288	cat_term:global_finito	list_4-6:no staining no staining	list_7-8:no staining no staining	inclusive hindgut PR	hindgut proper PR	atrium dors epidermis dors trunk esophagus foregut head epidermis hindgut tracheal sys vent epidermis
Pharynx	Cpr66Cb	CG7076	490	557	737.664	18.6776	Set 1	5.22834	49.8197	NA	NA	NA	NA	NA	NA
Pharynx	Cpr62Bc	CG1919	565	831	899.509	30.9543	Set 1	4.81506	47.2578	cat_term:global_finito	list_4-6:no staining no staining	list_7-8:no staining no staining	cat_term:finito9-10 no staining	no staining	atrium dors epidermis epipharynx foregut head epidermis head epidermis dors hypopharynx post spiracle tracheal sys vent epidermis
Pharynx	Drip	CG9023	547	870	840.944	36.8529	Set 1	4.47354	43.4719	NA	NA	NA	NA	NA	NA
Pharynx	CG2150	CG2150	1510	3792	2038.64	142.135	Set 1	3.83215	42.1311	cat_term:global_finito maternal	faint ubiquitous	faint ubiquitous	faint ubiquitous	faint ubiquitous	epipharynx esophagus foregut head epidermis head epidermis dors hypopharynx post spiracle sensory sys head vent sensory complex PR
Pharynx	fng	CG10580	3260	9993	4983.97	475.889	Set 1	3.38557	41.5862	cat_term:global_finito	list_4-6:no staining no staining	hindgut A list_7-8:no staining no staining	foregut PR inclusive hindgut PR	clypeo-labral PR foregut PR gnathal PR hindgut proper PR large intestine SA post spiracle SA proventriculus PR tracheal PR vent epidermis PR	anal pad atrium cuprophilic cell dors epidermis epipharynx foregut hindgut hypopharynx large intestine lateral cord glia midgut interstitial cell post spiracle proventriculus proventriculus inner layer proventriculus intermediate layer sensory sys head tracheal sys vent epidermis vent nerve cord
Pharynx	Cpr50Cb	CG6305	146	146	247.358	6.43692	Set 1	5.05575	40.225	cat_term:global_finito maternal no staining	no staining	no staining	no staining	no staining	epipharynx foregut hypopharynx
Pharynx	Vajk1	CG16886	775	2759	1213.47	99.38	Set 1	3.5956	36.8409	no staining	no staining	amnioserosa A	amnioserosa PR	no staining	head epidermis post spiracle vent epidermis
Pharynx	bbg	CG42230	3831	15606	5636.09	715.145	Set 1	2.97637	37.0878	cat_term:global_finito	dors ectoderm AISN hindgut AISN list_4-6:specific post endoderm AISN procephalic ectoderm AISN subset	dors ectoderm PR foregut A hindgut A list_7-8:specific mesectoderm PR post endoderm PR procephalic ectoderm A	ant endoderm PR dors ectoderm PR foregut PR inclusive hindgut PR mesectoderm PR post endoderm PR	ant midgut PR dors epidermis PR foregut PR hindgut proper PR post midgut PR proventriculus PR small intestine SA	dors epidermis epipharynx foregut hindgut hypopharynx midgut proventriculus ring gland sensory nervous sys PR small intestine vent epidermis vent midline
Pharynx	nyo	CG1499	1263	4016	1933.71	178.992	Set 1	3.42537	37.3978	no staining	list_4-6:no staining no staining	no staining	cat_term:finito9-10 no staining	esophagus PR P1 foregut PR hindgut proper PR large intestine SA salivary gland body PR salivary gland PR	atrium cat_term:global_finito epipharynx esophagus foregut head epidermis hindgut post spiracle salivary gland sensory sys head vent epidermis
Pharynx_2	CG12523	CG12523	878	411	2225.72	13.8352	Set 1	7.2291	80.3927	cat_term:global_finito maternal no staining	no staining	no staining	no staining	no staining	no staining
Pharynx_2	TwdlC	CG14254	1292	857	3300.82	30.3056	Set 1	6.72026	78.5534	no staining	list_4-6:no staining no staining	no staining	cat_term:finito9-10 no staining	no staining	cat_term:global_finito epipharynx foregut hypopharynx no staining
Pharynx_2	TwdlE	CG14534	1399	1125	3536.13	41.274	Set 1	6.38626	75.2835	cat_term:global_finito	no staining	list_7-8:no staining no staining	no staining	NA	epipharynx head epidermis maxillary sensory complex tracheal sys vent imaginal precursor vent sensory complex PR
Pharynx_2	CG2150	CG2150	2666	3600	6422.78	130.242	Set 1	5.6129	70.9987	cat_term:global_finito maternal	faint ubiquitous	faint ubiquitous	faint ubiquitous	faint ubiquitous	epipharynx esophagus foregut head epidermis head epidermis dors hypopharynx post spiracle sensory sys head vent sensory complex PR
Pharynx_2	Cpr56F	CG9036	882	818	2252.96	27.5039	Set 1	6.30452	70.2213	cat_term:global_finito maternal	faint ubiquitous list_4-6:ubiquitous	faint ubiquitous list_7-8:ubiquitous	faint ubiquitous	NA	atrium epipharynx foregut hypopharynx post spiracle
Pharynx_2	CG13041	CG13041	273	121	717.513	4.91839	Set 1	6.92166	65.6787	NA	NA	NA	NA	NA	NA
Pharynx_2	CG13059	CG13059	526	508	1467.75	18.3008	Set 1	6.2488	65.7397	NA	NA	NA	NA	NA	NA
Pharynx_2	CG34461	CG34461	885	1156	2362.07	38.9364	Set 1	5.8862	65.9634	flag_for_volker maternal	maternal rapidly degraded	no staining	no staining	no staining	dors epidermis tracheal sys
Pharynx_2	Cpr65Av	CG32405	190	51	416.576	1.75204	Set 1	7.24193	63.0475	cat_term:global_finito	no staining	list_7-8:no staining no staining	no staining	no staining	epipharynx esophagus foregut head epidermis hypopharynx post spiracle proventriculus
Pharynx_2	Muc91C	CG7709	1496	2594	3939.06	97.5959	Set 1	5.32018	63.5443	NA	NA	NA	NA	NA	NA
Pharynx_2	CG13060	CG13060	226	160	606.869	5.84794	Set 1	6.46957	59.8281	cat_term:global_finito no staining	no staining	no staining	no staining	no staining	no staining
Pharynx_2	Cpr50Cb	CG6305	254	80	669.504	3.46135	Set 1	7.22947	67.8782	cat_term:global_finito maternal no staining	no staining	no staining	no staining	no staining	epipharynx foregut hypopharynx
Pharynx_2	CG13675	CG13675	200	89	494.298	3.61003	Set 1	6.74446	60.3775	flag_for_volker no staining	no staining	no staining	no staining	no staining	stomatogastric nervous sys
Pharynx_2	Ccp84Ac	CG1327	653	1201	1861.22	40.2356	Set 1	5.49621	59.7043	no staining	no staining	no staining	no staining	no staining	no staining
Pharynx_2	TwdlV	CG14640	420	535	1029.01	19.6372	Set 1	5.63986	56.4462	NA	NA	NA	NA	NA	NA
Pharynx_2	CG13043	CG13043	230	271	645.38	10.7412	Set 1	5.7805	53.9681	no staining	list_4-6:no staining no staining	no staining	cat_term:finito9-10 no staining	no staining	antennal sense organ cat_term:global_finito head epidermis labral sensory complex sensory sys head
Pharynx_2	CG7548	CG7548	134	185	348.6	3.76289	Set 1	6.19359	52.3331	NA	NA	NA	NA	NA	NA
Pharynx_2	Cpr65Eb	CG8638	817	1475	2085.09	53.9734	Set 1	5.24524	57.8371	cat_term:global_finito	list_4-6:no staining no staining	list_7-8:no staining no staining	no staining	no staining	dors epidermis head epidermis vent epidermis
Pharynx_2	CG4000	CG4000	81	11	199.235	0.398733	Set 1	7.15421	54.6979	cat_term:global_finito maternal	maternal	ubiquitous	ubiquitous	ubiquitous	cat_term:endo_meso no staining ubiquitous
Pharynx_2	CG14191	CG14191	172	204	460.182	6.92978	Set 1	5.85878	51.8455	maternal	maternal	ubiquitous	ubiquitous	ubiquitous	ubiquitous
Foregut_primordium	scro	CG17594	831	1354	1237.13	57.941	Set 1	4.39158	45.1189	cat_term:global_finito maternal no staining	clypeolabrum AISN faint ubiquitous no staining	clypeolabrum A	clypeolabrum PR hypopharynx PR visual PR	clypeo-labral PR hypopharynx PR P1 optic lobe PR	brain epipharynx hypopharynx optic lobe vent nerve cord
Foregut_primordium	CG42741	CG42741	685	1512	1026.86	67.4808	Set 1	3.9064	39.0852	flag_for_volker no staining	hindgut AISN	hindgut A procephalic ectoderm A	inclusive hindgut PR procephalic ectoderm PR	dors/lateral sensory complexes PR head epidermis PR P1 labial sensory complex PR labral sensory complex PR maxillary sensory complex PR vent sensory complex SA	no staining
Foregut_primordium	CG10348	CG10348	389	1129	604.007	48.1559	Set 1	3.61913	33.4437	no staining	no staining	no staining	no staining	dors ridge PR P1 head epidermis PR P1	dors ridge head epidermis post spiracle
Foregut_primordium	Ser	CG6127	1525	6399	2232.07	283.481	Set 1	2.97198	33.0627	no staining	no staining	no staining	no staining	no staining	no staining
Foregut_primordium	Vsx1	CG4136	411	1509	609.851	61.9881	Set 1	3.27531	30.3119	cat_term:global_finito no staining	list_4-6:no staining no staining	list_7-8:no staining no staining	no staining	brain PR clypeo-labral PR foregut PR pars intercerebralis PR	brain central brain pars intercerebralis central nervous sys epipharynx
Foregut_primordium	ds	CG17941	2260	16425	3286.98	697.293	Set 1	2.23486	26.1098	NA	NA	NA	NA	NA	NA
Foregut_primordium	CG42747	CG42747	1603	10470	2398.33	486.961	Set 1	2.29719	25.7938	NA	NA	NA	NA	NA	NA
Foregut_primordium	CG34398	CG34398	438	2194	640.725	97.4368	Set 1	2.70244	25.2024	NA	NA	NA	NA	NA	NA
Foregut_primordium	CG4374	CG4374	291	1436	445.258	65.6503	Set 1	2.73996	24.1164	no staining	no staining	no staining	no staining	no staining	no staining
Foregut_primordium	CG13300	CG13300	1286	9437	1903.11	410.256	Set 1	2.21025	24.0805	NA	NA	NA	NA	NA	NA
Foregut_primordium	Fas3	CG5803	5336	49377	7816.22	2209.03	Set 1	1.8224	23.5681	cat_term:global_finito	list_4-6:no staining no staining	list_7-8:no staining no staining	cat_term:finito9-10 dors ectoderm PR no staining	brain PR clypeo-labral PR dors epidermis PR foregut PR head visceral muscle PR hindgut proper PR vent epidermis PR vent nerve cord PR visceral muscle PR	brain central brain neuron clypeolabrum dors epidermis dors vessel foregut head epidermis hindgut leading edge cell optic lobe tracheal sys vent epidermis vent midline vent nerve cord visceral muscle visceral muscle of esophagus
Foregut_primordium	fng	CG10580	1434	10594	2090.55	493.942	Set 1	2.07855	22.9272	cat_term:global_finito	list_4-6:no staining no staining	hindgut A list_7-8:no staining no staining	foregut PR inclusive hindgut PR	clypeo-labral PR foregut PR gnathal PR hindgut proper PR large intestine SA post spiracle SA proventriculus PR tracheal PR vent epidermis PR	anal pad atrium cuprophilic cell dors epidermis epipharynx foregut hindgut hypopharynx large intestine lateral cord glia midgut interstitial cell post spiracle proventriculus proventriculus inner layer proventriculus intermediate layer sensory sys head tracheal sys vent epidermis vent nerve cord
Foregut_primordium	heph	CG31000	3625	35406	5314.39	1507.3	Set 1	1.81698	22.4869	cat_term:global_finito maternal	list_4-6:ubiquitous ubiquitous	faint ubiquitous list_7-8:ubiquitous	faint ubiquitous foregut PR	faint ubiquitous foregut PR hindgut proper PR tracheal PR	brain central brain glia faint ubiquitous lateral cord glia vent nerve cord
Foregut_primordium	cnc	CG43286	1408	12878	2059.23	531.288	Set 1	1.95182	21.4868	cat_term:global_finito maternal no staining	cellular blastoderm clypeolabrum AISN foregut AISN hypopharynx AISN list_4-6:specific no staining subset vent ectoderm AISN	clypeolabrum A foregut A hypopharynx A list_7-8:specific no staining vent ectoderm PR	clypeolabrum PR foregut PR hypopharynx PR no staining vent ectoderm PR	clypeo-labral PR gnathal PR hypopharynx PR P1 no staining post midgut PR	epipharynx head epidermis head epidermis dors hypopharynx midgut no staining
Foregut_primordium	CG32447	CG32447	414	2677	600.694	122.898	Set 1	2.27747	21.0277	flag_for_volker no staining	cellular blastoderm dors ectoderm A vent ectoderm AISN	dors ectoderm PR vent ectoderm PR	tracheal sys A	foregut PR tracheal PR	esophagus foregut post spiracle tracheal sys
Foregut_primordium	mgl	CG42611	4917	52055	7226.43	2291.08	Set 1	1.65663	21.2368	no staining	list_4-6:specific yolk nuclei	amnioserosa A clypeolabrum A dors ectoderm PR list_7-8:specific vent ectoderm PR	amnioserosa PR clypeolabrum PR dors ectoderm PR inclusive hindgut PR vent ectoderm PR	amnioserosa clypeo-labral PR dors epidermis PR foregut PR hindgut proper PR Malpighian tubule PR vent epidermis PR	apoptotic amnioserosa atrium cat_term:global_finito clypeolabrum dors epidermis epipharynx esophagus foregut hindgut hypopharynx Malpighian tubule vent epidermis
Foregut_primordium	RhoGEF64C	CG32239	1138	8700	1669.74	415.231	Set 1	2.00417	21.4572	cat_term:global_finito	list_4-6:no staining no staining	list_7-8:no staining no staining	cat_term:finito9-10 no staining	hindgut proper PR large intestine SA Malpighian tubule tip cell PR post spiracle SA small intestine SA	anal pad atrium dors epidermis epipharynx esophagus foregut head epidermis hindgut hypopharynx large intestine Malpighian tubule tip cell post spiracle vent epidermis
Foregut_primordium	sr	CG7847	550	3959	787.481	173.897	Set 1	2.17074	20.8889	no staining	no staining	no staining	no staining	clypeo-labral PR dors epidermis PR no staining	clypeolabrum dors apodeme dors epidermis
Foregut_primordium	disco-r	CG32577	881	7444	1307.84	334.832	Set 1	1.96137	20.3082	maternal	maternal no staining	no staining	clypeolabrum PR	atrium PR clypeo-labral PR segmentally repeated vent epidermis PR	atrium circular visceral muscle fibers clypeolabrum
Foregut_primordium	sano	CG12758	1148	9707	1676.6	430.456	Set 1	1.95825	20.9771	maternal	cellular blastoderm list_4-6:ubiquitous no staining	list_7-8:no staining no staining	cat_term:finito9-10 no staining	cat_term:finito11-12 clypeo-labral PR foregut PR hypopharyngeal sense organ PR optic lobe PR salivary gland body PR salivary gland PR tracheal PR	atrium cat_term:finito13-16 cat_term:global_finito dors epidermis head epidermis hypopharynx optic lobe vent epidermis
Plasmatocytes	Pxn	CG12002	12171	2487	7157.28	99.7604	Set 1	6.15041	78.7585	cat_term:global_finito	list_4-6:no staining no staining	list_7-8:no staining no staining	cat_term:finito9-10 crystal cell SA head mesoderm PR no staining	garland cell PR plasmatocytes A post midgut PR procrystal cell	crystal cell garland cell lymph gland plasmatocytes sensory sys head
Plasmatocytes	Col4a1	CG4145	34207	11518	20040.5	462.248	Set 1	5.43499	77.6698	cat_term:global_finito	list_4-6:no staining no staining	no staining	no staining	plasmatocytes A	fat body plasmatocytes
Plasmatocytes	vkg	CG16858	21735	7681	12671.5	313.299	Set 1	5.3333	72.6897	no staining	list_4-6:no staining no staining	list_7-8:no staining no staining	cat_term:finito9-10 no staining	cardiac mesoderm PR pericardial cell SA plasmatocytes A	cat_term:global_finito circulatory sys fat body pericardial cell plasmatocytes
Plasmatocytes	NtR	CG6698	1948	411	1168.18	14.7948	Set 1	6.20867	63.2743	cat_term:global_finito	list_4-6:no staining no staining	head mesoderm PR list_7-8:no staining no staining	head mesoderm PR	central brain neuron dors imaginal precursor SA gnathal PR labral sensory complex PR plasmatocytes A vent epidermis PR vent sensory complex SA	head epidermis plasmatocytes sensory sys head
Plasmatocytes	NimC4	CG16876	5307	3116	3242.39	124.297	Set 1	4.69364	54.7432	cat_term:finito1-3 no staining	AISN ant endoderm AISN cat_term:finito4-6 dors ectoderm AISN gap list_4-6:specific post endoderm AISN vent ectoderm AISN yolk nuclei	ant endoderm A cat_term:finito7-8 dors ectoderm PR list_7-8:no staining pair_rule post endoderm PR vent ectoderm PR yolk nuclei	amnioserosa ant endoderm PR cat_term:finito9-10 dors ectoderm PR foregut PR head mesoderm PR post endoderm PR procephalic ectoderm PR segmentally repeated vent ectoderm PR yolk nuclei	amnioserosa brain PR cat_term:global_finito head mesoderm PR plasmatocytes A vent nerve cord PR yolk nuclei	brain cat_term:global_finito central brain glia central nervous sys lateral cord glia plasmatocytes vent midline vent midline glia vent nerve cord
Plasmatocytes	Sr-CI	CG4099	748	306	458.037	11.871	Set 1	5.15327	45.5676	NA	NA	head mesoderm PR	head mesoderm PR plasmatocytes PR	head mesoderm PR plasmatocytes A	NA
Plasmatocytes	Karl	CG4139	869	181	514.647	6.9408	Set 1	6.01816	54.225	no staining	no staining	no staining	no staining	plasmatocytes A	plasmatocytes
Plasmatocytes	nAChRbeta3	CG11822	933	294	569.879	10.9818	Set 1	5.57174	51.0206	cat_term:global_finito	list_4-6:no staining no staining	list_7-8:no staining no staining	no staining	labial sensory complex PR labral sensory complex PR maxillary sensory complex PR optic lobe PR plasmatocytes A	foregut sensory structure plasmatocytes sensory sys head
Plasmatocytes	CG1092	CG1092	1267	381	757.21	15.7504	Set 1	5.49843	52.6004	cat_term:global_finito no staining	list_4-6:no staining no staining	list_7-8:no staining no staining	no staining	plasmatocytes A	fat body plasmatocytes
Plasmatocytes	fat-spondin	CG6953	3931	2411	2322.19	106.721	Set 1	4.43011	49.537	cat_term:global_finito no staining	list_4-6:no staining no staining	no staining	no staining	fat body/gonad PR plasmatocytes A yolk nuclei	fat body plasmatocytes yolk nuclei
Plasmatocytes	SPARC	CG6378	9003	7261	5275.77	306.851	Set 1	4.09908	50.6869	cat_term:global_finito	list_4-6:no staining no staining	no staining	no staining	plasmatocytes A	fat body plasmatocytes
Plasmatocytes	Hexo2	CG1787	1205	554	717.037	23.1972	Set 1	4.88913	46.3877	cat_term:global_finito maternal	list_4-6:no staining no staining	list_7-8:no staining no staining	no staining	plasmatocytes A	circulatory sys garland cell lymph gland muscle sys plasmatocytes
Plasmatocytes	scf	CG9148	7579	7457	4515.44	326.337	Set 1	3.78602	45.9659	cat_term:global_finito maternal	cellular blastoderm list_4-6:ubiquitous yolk nuclei	head mesoderm PR list_7-8:specific trunk mesoderm PR yolk nuclei	crystal cell SA head mesoderm PR plasmatocytes PR trunk mesoderm PR yolk nuclei	fat body/gonad PR garland cell PR plasmatocytes A procrystal cell trunk mesoderm PR visceral muscle PR yolk nuclei	crystal cell fat body garland cell plasmatocytes yolk nuclei
Posterior_spiracle	Cad96Cb	CG13664	1321	608	2515.66	27.5717	Set 1	6.46021	72.9828	flag_for_volker no staining	no staining	no staining	no staining	dors/lateral sensory complexes PR	ant spiracle dors/lateral sensory complexes post spiracle
Posterior_spiracle	CG17572	CG17572	361	103	685.809	2.97128	Set 1	7.43206	70.038	cat_term:global_finito	list_4-6:no staining no staining	list_7-8:no staining no staining	no staining	no staining	antennal sense organ muscle sys post spiracle sensory sys head
Posterior_spiracle	CG2663	CG2663	1873	1827	3550.08	65.3538	Set 1	5.74153	67.7159	NA	NA	NA	NA	post midgut PR	cat_term:global_finito head epidermis post spiracle proventriculus sensory sys head tracheal sys
Posterior_spiracle	CG34232	CG34232	870	570	1722.61	23.8341	Set 1	6.11613	65.7559	no staining	no staining	no staining	no staining	post spiracle SA	post spiracle
Posterior_spiracle	nyo	CG1499	2128	3735	3962.51	163.481	Set 1	4.59042	54.8673	no staining	list_4-6:no staining no staining	no staining	cat_term:finito9-10 no staining	esophagus PR P1 foregut PR hindgut proper PR large intestine SA salivary gland body PR salivary gland PR	atrium cat_term:global_finito epipharynx esophagus foregut head epidermis hindgut post spiracle salivary gland sensory sys head vent epidermis
Posterior_spiracle	CG8945	CG8945	118	39	221.624	1.45903	Set 1	6.49388	50.6423	NA	NA	NA	NA	NA	NA
Posterior_spiracle	CG12814	CG12814	1591	3715	2907.74	163.918	Set 1	4.14007	47.6364	NA	NA	NA	NA	NA	NA
Posterior_spiracle	CG42524	CG42524	944	1792	1827.78	87.2806	Set 1	4.37185	47.3763	NA	NA	NA	NA	NA	NA
Posterior_spiracle	Oaz	CG42702	249	324	474.464	13.1849	Set 1	5.06387	45.034	cat_term:global_finito flag_for_volker no staining	cellular blastoderm list_4-6:specific procephalic ectoderm AISN subset	list_7-8:specific procephalic ectoderm A visual A	central brain PR P3 dors ectoderm PR procephalic ectoderm PR visual PR	(larval eye PR) brain PR optic lobe PR pars intercerebralis PR post spiracle SA procephalic neuroblasts	brain cat_term:any_neural cat_term:subset_CNS central brain central brain neuron central brain pars intercerebralis central nervous sys optic lobe post spiracle vent nerve cord
Posterior_spiracle	CG11905	CG11905	1510	4746	2856.45	194.883	Set 1	3.86616	44.3855	cat_term:global_finito no staining	list_4-6:no staining no staining	list_7-8:no staining no staining	cat_term:finito9-10 no staining	dors trunk SA primary segmental branch SA tracheal PR visceral branch SA	dors branch dors epidermis dors trunk head epidermis post spiracle tracheal sys visceral branch
Posterior_spiracle	CG8192	CG8192	549	1283	1011.74	50.4249	Set 1	4.29822	42.9136	no staining	no staining	no staining	no staining	no staining	no staining
Posterior_spiracle	IRSp53	CG32082	1672	5510	3139.97	253.896	Set 1	3.62277	42.0857	NA	NA	NA	NA	NA	NA
Posterior_spiracle	CG42296	CG42296	429	1010	819.23	45.3465	Set 1	4.14374	40.1109	NA	NA	NA	NA	NA	NA
Posterior_spiracle	ImpE1	CG32356	2757	11598	5098.96	536.006	Set 1	3.24719	39.9933	cat_term:global_finito	list_4-6:no staining no staining	list_7-8:no staining no staining	inclusive hindgut PR	hindgut proper PR	atrium dors epidermis dors trunk esophagus foregut head epidermis hindgut tracheal sys vent epidermis
Posterior_spiracle	ect	CG6611	5597	29837	10186.7	1284.74	Set 1	2.98601	39.7574	cat_term:global_finito	list_4-6:no staining no staining	list_7-8:no staining no staining	no staining	no staining	anal pad dors epidermis esophagus head epidermis hypopharynx tracheal sys vent epidermis
Posterior_spiracle	CG13640	CG13640	66	23	121.444	1.11796	Set 1	5.84147	40.5164	NA	no staining	no staining	no staining	no staining	cat_term:global_finito no staining post spiracle
Posterior_spiracle	Osi17	CG15598	442	994	822.428	44.4694	Set 1	4.17692	40.4556	cat_term:global_finito	list_4-6:no staining no staining	no staining	no staining	no staining	dors epidermis epipharynx esophagus foregut head epidermis hindgut hypopharynx vent epidermis
Posterior_spiracle	ru	CG1214	140	179	247.186	7.84272	Set 1	4.80496	38.2248	NA	list_4-6:no staining	list_7-8:no staining	NA	NA	cat_term:global_finito dors/lateral sensory complexes sensory nervous sys PR sensory sys head vent sensory complex PR
Posterior_spiracle	CG42331	CG42331	800	2825	1529.45	129.998	Set 1	3.5454	37.5095	cat_term:global_finito	list_4-6:no staining no staining	no staining	cat_term:finito9-10 no staining	no staining	anal pad dors epidermis esophagus head epidermis hypopharynx post spiracle vent epidermis
Posterior_spiracle	Osi9	CG15592	1696	7296	3154.04	313.518	Set 1	3.32599	38.6594	NA	list_4-6:no staining no staining	no staining	no staining	no staining	cat_term:global_finito dors branch dors trunk esophagus post spiracle salivary gland common duct salivary gland duct tracheal sys visceral branch
Procephalic_ectoderm_A	Brd	CG3096	609	984	277.463	33.7311	Set 1	2.998	24.3478	NA	NA	NA	NA	NA	NA
Procephalic_ectoderm_A	E(spl)m4-BFM	CG6099	359	578	162.774	21.0504	Set 1	2.88399	21.2134	NA	NA	NA	NA	NA	NA
Procephalic_ectoderm_A	Tom	CG5185	1621	4618	741.051	172.989	Set 1	2.09058	19.9344	no staining	dors ectoderm AISN procephalic ectoderm AISN	dors ectoderm PR procephalic ectoderm A	dors ectoderm PR procephalic ectoderm PR tracheal sys A	dors epidermis PR head epidermis dors PR P1 tracheal PR	clypeolabrum dors epidermis dors histoblast nest abdominal dors imaginal precursor head epidermis head epidermis dors lymph gland tracheal sys
Procephalic_ectoderm_A	link	CG13333	1796	5330	844.109	217.106	Set 1	1.9524	18.9831	cat_term:global_finito flag_for_volker	dors ectoderm AISN list_4-6:specific procephalic ectoderm AISN vent ectoderm AISN visual AISN	NA	dors ectoderm PR foregut PR inclusive hindgut PR mesectoderm PR procephalic ectoderm PR vent ectoderm PR visual PR	central brain glia central brain neuron clypeo-labral PR dors epidermis PR foregut PR hindgut proper PR inner optic lobe PR large intestine SA midline PR optic lobe PR tracheal PR	cat_term:any_neural cat_term:subset_CNS central brain epipharynx foregut head epidermis hypopharynx inner optic lobe optic lobe outer optic lobe sensory nervous sys PR sensory sys head tracheal sys vent midline
Procephalic_ectoderm_A	Ama	CG2198	2977	9835	1387.9	398.839	Set 1	1.79541	18.7436	cat_term:global_finito flag_for_volker maternal	AISN amnioserosa AISN cellular blastoderm dors ectoderm AISN list_4-6:specific mesoderm AISN procephalic ectoderm AISN subset ubiquitous vent ectoderm AISN visual AISN	dors ectoderm PR head mesoderm PR list_7-8:specific procephalic ectoderm A trunk mesoderm PR ubiquitous vent ectoderm PR vent nerve cord A	amnioserosa dors ectoderm PR head mesoderm PR procephalic ectoderm PR trunk mesoderm PR ubiquitous vent ectoderm PR vent nerve cord PR P3	amnioserosa ant midgut PR dors epidermis PR faint ubiquitous gnathal PR head mesoderm PR hypopharynx PR P1 lateral cord glia lateral cord neuron optic lobe PR post midgut PR sensory nervous sys SA trunk mesoderm PR vent epidermis PR yolk nuclei	adult midgut precursor amnioserosa dors epidermis faint ubiquitous midgut optic lobe sensory nervous sys PR tracheal sys vent epidermis vent nerve cord vent sensory complex PR yolk nuclei
Procephalic_ectoderm_A	Hsp70Bc	CG6489	382	891	179.395	31.7003	Set 1	2.45576	18.406	NA	NA	NA	NA	NA	NA
Procephalic_ectoderm_A	Obp99a	CG18111	2072	6729	946.793	262.041	Set 1	1.84776	18.2715	cat_term:global_finito	list_4-6:no staining no staining	list_7-8:specific procephalic ectoderm A	central brain PR P3 inclusive hindgut PR procephalic ectoderm PR vent ectoderm PR	brain PR hindgut proper PR vent epidermis PR vent nerve cord PR	brain cat_term:any_neural cat_term:subset_CNS central brain glia central brain neuron dors epidermis head epidermis vent epidermis
Procephalic_ectoderm_A	lmd	CG4677	1113	3106	541.322	138.997	Set 1	1.95109	17.7218	cat_term:global_finito	list_4-6:no staining no staining	list_7-8:no staining no staining trunk mesoderm PR	head mesoderm PR no staining trunk mesoderm PR	dors pharyngeal muscle PR longitudinal visceral mesoderm PR muscle sys PR somatic muscle PR visceral muscle PR	dors prothoracic pharyngeal muscle muscle sys somatic muscle
Procephalic_ectoderm_A	E(spl)m8-HLH	CG8365	178	413	85.4814	15.4925	Set 1	2.3738	15.2738	maternal	faint ubiquitous mesectoderm A mesectoderm AISN	procephalic ectoderm A vent ectoderm PR	ant endoderm PR dors epidermis A post endoderm PR procephalic ectoderm PR stomatogastric nervous sys PR vent ectoderm PR visual PR	ant midgut PR dors epidermis PR head epidermis PR P1 pars intercerebralis PR post midgut PR stomatogastric nervous sys PR visual PR2	central brain pars intercerebralis optic lobe stomatogastric nervous sys
Procephalic_ectoderm_A	Hsp68	CG5436	311	870	148.554	28.9555	Set 1	2.3101	16.6894	NA	NA	NA	NA	NA	NA
Procephalic_ectoderm_A	E(spl)mgamma-HLH	CG8333	374	1044	163.701	38.1187	Set 1	2.06513	15.207	no staining	no staining	no staining procephalic ectoderm A vent ectoderm PR	no staining procephalic ectoderm PR vent ectoderm PR	ant midgut PR hindgut proper PR no staining pars intercerebralis PR procephalon PR stomatogastric nervous sys PR trunk mesoderm PR visual PR2	central brain pars intercerebralis no staining stomatogastric nervous sys visual sys
Procephalic_ectoderm_A	CG4455	CG4455	1023	3667	492.871	151.192	Set 1	1.69532	15.1697	cat_term:global_finito maternal	gap list_4-6:specific subset ubiquitous	list_7-8:ubiquitous ubiquitous	foregut PR inclusive hindgut PR procephalic ectoderm PR ubiquitous vent ectoderm PR	ant midgut PR dors epidermis PR foregut PR hindgut proper PR Malpighian tubule PR post midgut PR procephalon PR ubiquitous vent epidermis PR	dors epidermis
Procephalic_ectoderm_A	Hsp70Aa	CG31366	197	554	94.5925	20.5494	Set 1	2.13408	14.0397	no staining	no staining	no staining	no staining	no staining	no staining
Procephalic_ectoderm_A	bib	CG4722	1159	3917	523.346	165.954	Set 1	1.64831	14.8915	cat_term:global_finito	AISN list_4-6:specific subset ubiquitous	list_7-8:specific ubiquitous	ubiquitous	brain PR optic lobe PR pars intercerebralis PR pericardial cell SA stomatogastric nervous sys PR tracheal PR trunk mesoderm PR vent epidermis PR	brain central brain neuron central brain pars intercerebralis optic lobe stomatogastric nervous sys tracheal sys
Procephalic_ectoderm_A	E(spl)m7-HLH	CG8361	388	1264	181.778	47.9287	Set 1	1.89342	14.2271	no staining	mesectoderm A no staining vent ectoderm AISN	no staining procephalic ectoderm A vent ectoderm PR	dors ectoderm PR no staining procephalic ectoderm PR ubiquitous vent ectoderm PR	dors epidermis PR head epidermis PR P1 no staining optic lobe PR ubiquitous vent epidermis PR	central brain pars intercerebralis dors epidermis epipharynx head epidermis hindgut hypopharynx no staining optic lobe vent epidermis
Procephalic_ectoderm_A	CG13427	CG13427	229	572	100.456	23.3676	Set 1	2.04353	13.6195	faint ubiquitous maternal	strong ubiquitous	strong ubiquitous	dors epidermis A gnathal lobes A	dors epidermis PR dors/lateral sensory complexes PR maxillary sensory complex PR ubiquitous	dors epidermis dors/lateral sensory complexes faint ubiquitous maxillary sensory complex
Procephalic_ectoderm_A	E(spl)malpha-BFM	CG8337	275	764	118.631	29.4326	Set 1	1.96279	13.548	flag_for_volker no staining	mesectoderm A	NA	NA	NA	NA
Procephalic_ectoderm_A	N	CG3936	7426	32427	3096.54	1376.18	Set 1	1.16894	13.5561	NA	NA	NA	NA	NA	epipharynx hypopharynx
Procephalic_ectoderm_A	spdo	CG31020	423	1470	194.74	58.1544	Set 1	1.719	13.0864	cat_term:global_finito maternal	AISN dors ectoderm AISN ectoderm AISN endoderm AISN head mesoderm AISN hindgut AISN list_4-6:specific mesectoderm AISN mesoderm AISN procephalic ectoderm AISN subset ubiquitous vent ectoderm AISN	ant endoderm A dors ectoderm PR head mesoderm PR list_7-8:specific mesectoderm PR post endoderm PR trunk mesoderm PR vent ectoderm PR vent nerve cord A	ant endoderm PR head mesoderm PR inclusive hindgut PR mesectoderm PR post endoderm PR trunk mesoderm PR vent ectoderm PR vent nerve cord PR P3	hindgut proper PR midline PR vent epidermis PR	brain cat_term:any_neural cat_term:PNS dors epidermis dors/lateral sensory complexes foregut head epidermis hindgut lateral cord glia midgut muscle sys sensory nervous sys PR sensory sys head vent epidermis vent nerve cord vent sensory complex PR visceral muscle
Procephalic_ectoderm_A	ihog	CG9211	463	1633	226.86	69.1019	Set 1	1.69427	13.2696	cat_term:global_finito maternal	cellular blastoderm list_4-6:ubiquitous maternal	list_7-8:ubiquitous ubiquitous	ubiquitous	atrium PR dors epidermis PR foregut PR	anal pad atrium dors epidermis epipharynx hypopharynx sensory sys head
Ectoderm_AISN	CG10035	CG10035	1635	1610	832.454	59.641	Set 1	3.779	36.6675	cat_term:global_finito ubiquitous	ubiquitous	ubiquitous	ubiquitous	ubiquitous	ubiquitous
Ectoderm_AISN	sca	CG17579	3778	4664	1924.11	186.513	Set 1	3.35913	36.6505	no staining	no staining	no staining	no staining	no staining	no staining
Ectoderm_AISN	5-HT2A	CG1056	330	244	164.869	10.7631	Set 1	3.80898	28.087	cat_term:global_finito	cellular blastoderm dors ectoderm AISN list_4-6:specific subset vent ectoderm AISN	dors ectoderm PR list_7-8:specific vent ectoderm PR	dors ectoderm PR vent ectoderm PR	no staining	no staining
Ectoderm_AISN	Sr-CII	CG8856	484	632	254.459	23.9039	Set 1	3.35299	26.8137	cat_term:finito1-3 no staining	cat_term:finito4-6 list_4-6:specific ubiquitous	cat_term:finito7-8 ubiquitous	cat_term:finito9-10 ubiquitous	brain PR cat_term:global_finito faint ubiquitous vent nerve cord PR	cat_term:global_finito no staining
Ectoderm_AISN	Abd-B	CG11648	3355	7995	1785.85	337.801	Set 1	2.3981	25.9072	flag_for_volker no staining	dors ectoderm A dors ectoderm AISN gap list_4-6:specific mesoderm AISN no staining trunk mesoderm A vent ectoderm A vent ectoderm AISN	dors ectoderm PR gap no staining trunk mesoderm PR vent ectoderm PR	dors ectoderm PR gap no staining trunk mesoderm PR vent ectoderm PR vent epidermis PR vent nerve cord PR P3	cardiac mesoderm PR dors epidermis PR muscle sys PR no staining post spiracle SA vent epidermis PR vent nerve cord PR visceral muscle PR	amnioserosa dors epidermis dors trunk dors vessel hindgut muscle sys no staining post spiracle vent epidermis vent nerve cord
Ectoderm_AISN	link	CG13333	2208	5186	1164.72	202.268	Set 1	2.51852	25.6562	cat_term:global_finito flag_for_volker	dors ectoderm AISN list_4-6:specific procephalic ectoderm AISN vent ectoderm AISN visual AISN	NA	dors ectoderm PR foregut PR inclusive hindgut PR mesectoderm PR procephalic ectoderm PR vent ectoderm PR visual PR	central brain glia central brain neuron clypeo-labral PR dors epidermis PR foregut PR hindgut proper PR inner optic lobe PR large intestine SA midline PR optic lobe PR tracheal PR	cat_term:any_neural cat_term:subset_CNS central brain epipharynx foregut head epidermis hypopharynx inner optic lobe optic lobe outer optic lobe sensory nervous sys PR sensory sys head tracheal sys vent midline
Ectoderm_AISN	cas	CG2102	2635	5790	1396.93	266.809	Set 1	2.38299	24.9	cat_term:global_finito flag_for_volker maternal no staining	cellular blastoderm faint ubiquitous gap list_4-6:specific mesectoderm AISN no staining subset vent ectoderm AISN	gap list_7-8:specific mesectoderm PR no staining vent ectoderm PR vent nerve cord A	mesectoderm PR no staining procephalic ectoderm PR vent nerve cord PR P3	brain PR central brain glia central brain neuron lateral cord glia lateral cord neuron midline PR no staining procephalic neuroblasts vent nerve cord PR	brain cat_term:any_neural cat_term:subset_CNS central brain central brain glia central brain neuron central nervous sys lateral cord glia lateral cord neuron no staining vent nerve cord
Ectoderm_AISN	CG7884	CG7884	802	1293	423.042	53.5535	Set 1	2.95506	25.7919	cat_term:global_finito no staining	no staining	no staining	no staining	no staining	no staining
Ectoderm_AISN	bib	CG4722	1650	3804	849.578	156.854	Set 1	2.42815	23.6315	cat_term:global_finito	AISN list_4-6:specific subset ubiquitous	list_7-8:specific ubiquitous	ubiquitous	brain PR optic lobe PR pars intercerebralis PR pericardial cell SA stomatogastric nervous sys PR tracheal PR trunk mesoderm PR vent epidermis PR	brain central brain neuron central brain pars intercerebralis optic lobe stomatogastric nervous sys tracheal sys
Ectoderm_AISN	jigr1	CG17383	1969	4723	967.626	196.909	Set 1	2.28961	22.7125	maternal	ectoderm AISN faint ubiquitous list_4-6:specific ubiquitous	faint ubiquitous procephalic ectoderm A ubiquitous	faint ubiquitous procephalic ectoderm PR ubiquitous vent nerve cord PR P3	brain PR faint ubiquitous vent nerve cord PR	brain faint ubiquitous vent nerve cord
Ectoderm_AISN	opa	CG1133	781	1625	398.733	62.9738	Set 1	2.63987	22.8161	cat_term:finito1-3 maternal	cat_term:finito4-6 dors ectoderm AISN gap list_4-6:specific mesoderm AISN subset ubiquitous vent ectoderm AISN	cat_term:finito7-8 dors ectoderm PR faint ubiquitous gap list_7-8:specific trunk mesoderm PR vent ectoderm PR	cat_term:finito9-10 faint ubiquitous procephalic ectoderm PR vent ectoderm PR	brain PR cat_term:finito11-12 cat_term:global_finito faint ubiquitous vent epidermis PR visceral muscle PR	brain cat_term:finito13-16 cat_term:global_finito faint ubiquitous midgut vent epidermis visceral muscle
Ectoderm_AISN	Notum	CG13076	1590	4046	808.687	171.924	Set 1	2.22544	21.5005	NA	NA	NA	NA	NA	NA
Ectoderm_AISN	dan	CG11849	400	697	200.363	26.1699	Set 1	2.88253	22.0619	cat_term:global_finito	AISN cellular blastoderm dors ectoderm AISN ectoderm AISN list_4-6:specific procephalic ectoderm AISN subset ubiquitous vent ectoderm AISN visual AISN	dors ectoderm PR head epidermis lateral A list_7-8:specific procephalic ectoderm A ubiquitous vent ectoderm PR vent nerve cord A visual A	central brain PR P3 procephalic ectoderm PR vent ectoderm PR vent nerve cord PR P3	brain PR ganglion mother cell glioblasts of vent nervous sys gnathal PR neuroblasts of vent nervous sys procephalic neuroblasts vent epidermis PR vent nerve cord PR	brain cat_term:any_neural cat_term:subset_CNS central brain glia central brain neuron central nervous sys vent midline vent nerve cord
Ectoderm_AISN	DIP-alpha	CG32791	979	2102	488.788	88.2278	Set 1	2.45364	21.9258	cat_term:global_finito	no staining	list_7-8:no staining no staining	no staining	no staining	brain vent midline vent midline glia vent nerve cord
Ectoderm_AISN	CG15628	CG15628	616	1421	310.668	52.5072	Set 1	2.53757	21.0209	maternal	ant endoderm AISN cellular blastoderm head mesoderm AISN list_4-6:specific mesoderm AISN subset trunk mesoderm AISN	NA	ant endoderm PR head mesoderm PR main segment of Malpighian tubule SA Malpighian tubule A post endoderm PR	ant midgut PR foregut PR Malpighian tubule PR post midgut PR salivary gland body PR	NA
Ectoderm_AISN	BobA	CG12487	152	239	80.8964	8.7119	Set 1	3.05825	19.4374	NA	NA	NA	NA	NA	NA
Ectoderm_AISN	neur	CG11988	2845	8445	1425.03	356.308	Set 1	1.99576	20.9111	cat_term:global_finito maternal no staining	cellular blastoderm dors ectoderm AISN list_4-6:specific mesectoderm AISN mesoderm AISN no staining procephalic ectoderm AISN subset vent ectoderm AISN	ant endoderm A foregut A head mesoderm PR list_7-8:specific mesectoderm PR no staining post endoderm PR procephalic ectoderm A trunk mesoderm PR vent ectoderm PR vent nerve cord A	mesectoderm PR no staining procephalic ectoderm PR vent nerve cord PR P3 visual PR	brain PR central brain glia central brain neuron ganglion mother cell germ cell lateral cord glia lateral cord neuron neuroblasts of vent nervous sys no staining optic lobe PR sensory nervous sys SA stomatogastric nervous sys PR vent nerve cord PR vent sensory complex SA	brain cat_term:any_neural cat_term:pan_CNS central brain glia central brain neuron central brain surface glia central nervous sys gonad lateral cord glia lateral cord neuron lateral cord surface glia no staining sensory nervous sys PR stomatogastric nervous sys vent nerve cord vent sensory complex PR
Ectoderm_AISN	upd1	CG5993	355	700	187.514	28.5005	Set 1	2.66819	20.1676	NA	NA	NA	NA	NA	NA
Ectoderm_AISN	wntD	CG8458	130	192	72.7952	7.44915	Set 1	3.10697	19.2801	cat_term:global_finito	head mesoderm AISN list_4-6:specific mesectoderm AISN subset trunk mesoderm A trunk mesoderm AISN	head mesoderm PR list_7-8:specific mesectoderm PR procephalic ectoderm A trunk mesoderm PR	mesectoderm PR procephalic ectoderm PR vent ectoderm PR	brain PR midline PR	no staining
Ectoderm_AISN	CG13465	CG13465	137	170	71.8313	5.43157	Set 1	3.48137	21.5375	NA	NA	NA	NA	NA	NA
DV_epidermis_AISN	ds	CG17941	12846	14530	3175.15	635.565	Set 1	2.31844	26.9706	NA	NA	NA	NA	NA	NA
DV_epidermis_AISN	otp	CG10036	3749	4664	1150.68	218.57	Set 1	2.38973	24.3025	cat_term:global_finito maternal no staining	list_4-6:no staining no staining	hindgut A list_7-8:specific no staining	inclusive hindgut PR no staining	anal pad SA brain PR hindgut proper PR large intestine SA no staining vent nerve cord PR	anal pad brain hindgut large intestine no staining vent nerve cord vent sensory complex PR
DV_epidermis_AISN	robo2	CG5481	8695	11840	2017.45	534.191	Set 1	1.91441	21.0183	no staining	ubiquitous	ubiquitous	dors epidermis A ubiquitous vent epidermis PR	dors epidermis PR ubiquitous vent epidermis PR	dors epidermis ubiquitous vent epidermis
DV_epidermis_AISN	Notum	CG13076	2811	3664	728.657	160.781	Set 1	2.1712	20.6504	NA	NA	NA	NA	NA	NA
DV_epidermis_AISN	Pvf3	CG34378	7707	11712	1926.97	517.174	Set 1	1.89482	20.678	cat_term:global_finito flag_for_volker maternal	list_4-6:specific procephalic ectoderm AISN subset vent ectoderm AISN visual AISN	hindgut A list_7-8:specific procephalic ectoderm A vent ectoderm PR visual A	gnathal lobes A inclusive hindgut PR mesectoderm PR vent ectoderm PR visual PR	clypeo-labral PR gnathal PR hindgut proper PR Malpighian tubule PR midline PR optic lobe PR vent epidermis PR vent midline glia	clypeolabrum hindgut Malpighian tubule optic lobe vent midline
DV_epidermis_AISN	nkd	CG11614	21693	38793	5179.83	1737.83	Set 1	1.57479	19.4313	NA	ectoderm AISN strong ubiquitous	strong ubiquitous	strong ubiquitous	dors epidermis PR head epidermis PR P1 vent epidermis PR	dors epidermis head epidermis vent epidermis
DV_epidermis_AISN	dally	CG4974	8438	13676	2068.01	627.384	Set 1	1.71852	18.929	NA	NA	NA	NA	NA	NA
DV_epidermis_AISN	Poxm	CG9610	745	833	203.377	35.8317	Set 1	2.46514	18.9202	cat_term:global_finito maternal	faint ubiquitous ubiquitous	faint ubiquitous no staining	head mesoderm PR hindgut proper A trunk mesoderm PR	esophagus PR P1 head mesoderm PR large intestine SA somatic muscle PR trunk mesoderm PR	esophagus large intestine muscle sys somatic muscle
DV_epidermis_AISN	heph	CG31000	16786	33762	4214.08	1468.31	Set 1	1.52008	18.3038	cat_term:global_finito maternal	list_4-6:ubiquitous ubiquitous	faint ubiquitous list_7-8:ubiquitous	faint ubiquitous foregut PR	faint ubiquitous foregut PR hindgut proper PR tracheal PR	brain central brain glia faint ubiquitous lateral cord glia vent nerve cord
DV_epidermis_AISN	byn	CG7260	465	493	143.144	20.93	Set 1	2.70649	19.4093	no staining	hindgut AISN	hindgut A	inclusive hindgut PR	anal pad SA hindgut proper PR	anal pad hindgut
DV_epidermis_AISN	ed	CG12676	32982	68081	8120.46	3017.64	Set 1	1.42766	18.5418	cat_term:global_finito maternal	cellular blastoderm list_4-6:ubiquitous maternal	list_7-8:ubiquitous ubiquitous	dors epidermis A ubiquitous	atrium PR cat_term:finito11-12 clypeo-labral PR dors epidermis PR foregut PR head epidermis PR P1 hindgut proper PR ubiquitous vent epidermis PR	atrium cat_term:finito13-16 clypeolabrum dors epidermis dors vessel epipharynx foregut head epidermis head epidermis lateral head epidermis vent hindgut hypopharynx large intestine Malpighian tubule optic lobe tracheal sys vent epidermis visceral branch
DV_epidermis_AISN	mgl	CG42611	24111	49519	6005.95	2225.01	Set 1	1.43193	17.9742	no staining	list_4-6:specific yolk nuclei	amnioserosa A clypeolabrum A dors ectoderm PR list_7-8:specific vent ectoderm PR	amnioserosa PR clypeolabrum PR dors ectoderm PR inclusive hindgut PR vent ectoderm PR	amnioserosa clypeo-labral PR dors epidermis PR foregut PR hindgut proper PR Malpighian tubule PR vent epidermis PR	apoptotic amnioserosa atrium cat_term:global_finito clypeolabrum dors epidermis epipharynx esophagus foregut hindgut hypopharynx Malpighian tubule vent epidermis
DV_epidermis_AISN	ab	CG43860	15229	29698	3755.46	1319.24	Set 1	1.50819	17.91	cat_term:global_finito flag_as_incompleto maternal no staining	cellular blastoderm foregut AISN list_4-6:specific no staining subset	foregut A list_7-8:specific mesectoderm PR no staining	foregut PR mesectoderm PR no staining trunk mesoderm PR	ant midgut PR dors epidermis PR midline PR muscle sys PR no staining post midgut PR somatic muscle PR stomatogastric nervous sys PR trunk mesoderm PR vent epidermis PR	dors apodeme dors epidermis foregut midgut muscle sys no staining proventriculus somatic muscle stomatogastric nervous sys vent apodeme vent epidermis vent midline
DV_epidermis_AISN	grh	CG42311	7738	15278	1962.06	644.146	Set 1	1.60467	17.5533	cat_term:global_finito no staining	dors ectoderm AISN head epidermis dors AISN list_4-6:specific no staining procephalic ectoderm AISN ubiquitous	dors ectoderm PR list_7-8:specific no staining procephalic ectoderm A	dors epidermis A no staining procephalic ectoderm PR vent epidermis PR	dors epidermis PR no staining tracheal PR vent epidermis PR	dors epidermis head epidermis no staining vent epidermis
DV_epidermis_AISN	N	CG3936	15131	31403	3773.52	1333.68	Set 1	1.49942	17.8162	NA	NA	NA	NA	NA	epipharynx hypopharynx
DV_epidermis_AISN	hh	CG4637	1949	3122	512.74	134.766	Set 1	1.9171	17.2633	NA	NA	NA	NA	NA	NA
DV_epidermis_AISN	inv	CG17835	2461	4092	631.512	182.836	Set 1	1.78039	16.5664	cat_term:global_finito flag_for_volker maternal	dors ectoderm AISN ectoderm AISN list_4-6:specific procephalic ectoderm AISN segmentally repeated subset vent ectoderm AISN	dors ectoderm PR procephalic ectoderm A segmentally repeated vent ectoderm PR	dors ectoderm PR procephalic ectoderm PR segmentally repeated vent ectoderm PR	atrium PR clypeo-labral PR dors epidermis PR dors ridge PR P1 head epidermis PR P1 hindgut proper PR hypopharynx PR P1 procephalon PR salivary duct PR segmentally repeated vent epidermis PR vent nerve cord PR	atrium brain dors epidermis dors ridge epipharynx foregut head epidermis hindgut hypopharynx vent epidermis vent midline vent nerve cord
DV_epidermis_AISN	dpy	CG33196	13122	26536	3254.34	1159.86	Set 1	1.48717	17.3531	cat_term:global_finito	list_4-6:no staining no staining	no staining	cat_term:finito9-10 no staining	foregut PR hindgut proper PR tracheal PR	ant spiracle dors branch dors trunk esophagus garland cell hindgut large intestine pericardial cell post spiracle proventriculus rectum small intestine tracheal sys
DV_epidermis_AISN	CG8312	CG8312	5551	10252	1421.17	462.795	Set 1	1.61552	16.9207	cat_term:global_finito maternal	dors ectoderm AISN list_4-6:specific subset vent ectoderm AISN	dors ectoderm PR list_7-8:specific post endoderm PR procephalic ectoderm A	amnioserosa amnioserosa PR dors ectoderm PR head epidermis lateral PR	amnioserosa dors epidermis PR head epidermis dors PR P1 tracheal PR vent epidermis PR	amnioserosa dors epidermis head epidermis dors tracheal sys vent epidermis
DV_epidermis_AISN	Ser	CG6127	3578	5910	907.037	268.964	Set 1	1.7484	17.1808	no staining	no staining	no staining	no staining	no staining	no staining
Proventriculus_1	CG43896	CG43896	6210	83	2734.48	2.95186	Set 1	9.43452	107.719	flag_for_volker maternal no staining	no staining ubiquitous	faint ubiquitous no staining	faint ubiquitous no staining	no staining	faint ubiquitous midgut proventriculus
Proventriculus_1	CG7715	CG7715	6105	486	2912.45	16.6408	Set 1	7.36717	84.7852	cat_term:global_finito maternal ubiquitous	faint ubiquitous list_4-6:ubiquitous ubiquitous	list_7-8:ubiquitous no staining ubiquitous	no staining ubiquitous	cat_term:finito11-12 no staining ubiquitous	cat_term:finito13-16 foregut proventriculus ubiquitous
Proventriculus_1	CG13806	CG13806	1512	732	1810.37	29.3153	Set 1	5.9001	63.856	cat_term:global_finito no staining	list_4-6:no staining no staining	no staining	no staining	no staining	Malpighian tubule proventriculus proventriculus inner layer
Proventriculus_1	Cda9	CG15918	571	14	248.982	0.568695	Set 1	7.31033	58.2318	no staining	no staining	no staining	no staining	no staining	proventriculus
Proventriculus_1	obst-F	CG7306	466	13	204.338	0.44097	Set 1	7.14777	54.9081	no staining	no staining	no staining	no staining	no staining	no staining
Proventriculus_1	CG15818	CG15818	784	601	976.261	25.4714	Set 1	5.20476	51.6968	cat_term:global_finito	list_4-6:no staining no staining	list_7-8:no staining no staining	no staining	no staining	cat_term:global_finito midgut proventriculus
Proventriculus_1	CG30413	CG30413	686	474	802.585	22.409	Set 1	5.09952	49.2119	NA	NA	NA	NA	NA	NA
Proventriculus_1	Kaz-m1	CG8342	507	334	597.218	14.0686	Set 1	5.30864	48.9697	cat_term:global_finito no staining	no staining	list_7-8:specific yolk nuclei	crystal cell SA head mesoderm PR yolk nuclei	ant midgut PR plasmatocytes A post midgut PR procrystal cell proventriculus PR yolk nuclei	cuprophilic cell midgut midgut chamber proventriculus
Proventriculus_1	Lip1	CG7279	1104	1302	1336.94	52.0175	Set 1	4.65632	48.3596	cat_term:global_finito no staining	list_4-6:ubiquitous no staining	no staining	cat_term:finito9-10 no staining	no staining proventriculus PR	dors branch dors trunk esophagus midgut muscle sys post spiracle proventriculus somatic muscle tracheal sys visceral branch
Proventriculus_1	Lim3	CG10699	2160	2883	2571.2	131.451	Set 1	4.27891	48.4749	maternal no staining	no staining	no staining	no staining	no staining	brain cat_term:global_finito gastric caecum proventriculus vent nerve cord
Proventriculus_1	CG7567	CG7567	381	42	181.828	1.77195	Set 1	6.03553	45.353	cat_term:global_finito	list_4-6:no staining no staining	no staining	no staining	hindgut proper PR	hindgut post spiracle proventriculus rectum vent nerve cord
Proventriculus_1	ara	CG10571	1770	2996	2113.64	130.978	Set 1	4.00136	44.1998	cat_term:finito1-3 cat_term:global_finito flag_for_volker	cellular blastoderm dors ectoderm AISN gap list_4-6:specific subset trunk mesoderm AISN ubiquitous vent ectoderm AISN	dors ectoderm PR gap list_7-8:specific trunk mesoderm PR ubiquitous	dors ectoderm PR faint ubiquitous gap	dors epidermis PR faint ubiquitous proventriculus PR tracheal PR	atrium dors epidermis faint ubiquitous foregut head epidermis proventriculus sensory sys head tracheal sys vent epidermis
Proventriculus_1	CG13810	CG13810	225	123	259.156	4.68386	Set 1	5.51081	44.2145	NA	NA	NA	NA	NA	NA
Proventriculus_1	tgy	CG7440	162	103	190.282	3.41576	Set 1	5.42934	41.152	cat_term:finito1-3 cat_term:global_finito no staining	cat_term:finito4-6 list_4-6:no staining no staining	cat_term:finito7-8 no staining	cat_term:finito9-10 no staining	cat_term:finito11-12 no staining	cat_term:finito13-16 midgut proventriculus
Proventriculus_1	caup	CG10605	1481	3179	1770.96	130.129	Set 1	3.75547	40.5258	NA	no staining	no staining proventriculus A trunk mesoderm PR	proventriculus PR trunk mesoderm PR	cat_term:finito11-12 dors epidermis PR proventriculus PR somatic muscle PR trunk mesoderm PR	adult eye PR ant spiracle dors epidermis dors imaginal precursor head epidermis dors proventriculus sensory sys head tracheal sys vent imaginal precursor
Proventriculus_1	CG17047	CG17047	500	739	601.856	31.6801	Set 1	4.20293	38.8169	no staining	no staining	no staining	no staining	no staining	no staining proventriculus inner layer
Proventriculus_1	CG7997	CG7997	1456	3067	1737.65	131.946	Set 1	3.70823	39.9144	cat_term:global_finito maternal	apically cleared cellular blastoderm list_4-6:ubiquitous maternal	list_7-8:no staining no staining	amnioserosa no staining	amnioserosa	adult foregut precursor adult hindgut precursor amnioserosa dors trunk foregut hindgut proventriculus tracheal sys
Proventriculus_1	CG8925	CG8925	207	167	248.454	7.41405	Set 1	4.88404	38.8898	NA	NA	NA	NA	NA	NA
Proventriculus_1	dve	CG5799	1590	3521	1836.85	152.68	Set 1	3.57923	38.8125	cat_term:global_finito maternal	dors ectoderm A faint ubiquitous list_4-6:no staining no staining	ant endoderm A foregut A list_7-8:no staining no staining procephalic ectoderm A	ant endoderm PR foregut PR no staining procephalic ectoderm PR vent ectoderm PR	ant midgut PR brain PR dors/lateral sensory complexes PR no staining post midgut PR proventriculus PR vent epidermis PR vent nerve cord PR	brain dors/lateral sensory complexes midgut chamber proventriculus sensory sys head vent nerve cord vent sensory complex PR
Proventriculus_1	Myo28B1	CG6976	176	140	206.702	4.8931	Set 1	5.13238	39.511	flag_for_volker no staining	no staining	no staining	no staining	no staining	midgut chamber proventriculus
Proventriculus_2	Muc26B	CG13990	3993	96	14956.6	3.53056	Set 1	11.6888	162.107	cat_term:global_finito	list_4-6:no staining no staining	no staining	no staining	no staining	proventriculus
Proventriculus_2	CG7017	CG7017	3832	241	17391.9	9.99315	Set 1	10.6276	149.703	cat_term:global_finito	list_4-6:no staining no staining	list_7-8:no staining no staining	no staining	no staining	proventriculus proventriculus outer layer
Proventriculus_2	Muc96D	CG31439	2590	100	9272.91	4.52477	Set 1	10.7129	141.185	NA	NA	NA	NA	NA	NA
Proventriculus_2	CG17826	CG17826	1109	32	4202.3	1.2247	Set 1	10.8833	131.006	cat_term:global_finito no staining	no staining	no staining	no staining	no staining	no staining
Proventriculus_2	CG12934	CG12934	483	57	2518.95	2.20171	Set 1	9.61976	108.695	flag_for_volker no staining	no staining	no staining	no staining	no staining	proventriculus
Proventriculus_2	CG10725	CG10725	352	21	1794.44	1.01682	Set 1	9.79724	105.909	no staining	no staining	no staining	no staining	no staining	no staining
Proventriculus_2	CG7714	CG7714	762	339	4293.86	12.4809	Set 1	8.31522	100.351	cat_term:global_finito no staining	no staining	list_7-8:no staining no staining	no staining	no staining	adult midgut precursor midgut midgut chamber proventriculus
Proventriculus_2	CG6933	CG6933	829	399	4143.51	17.7034	Set 1	7.79141	93.6292	cat_term:global_finito no staining	list_4-6:no staining no staining	list_7-8:no staining no staining	no staining	no staining	cat_term:global_finito gastric caecum midgut proventriculus
Proventriculus_2	CG11672	CG11672	184	37	988.854	1.45863	Set 1	8.65176	86.0943	NA	NA	NA	NA	NA	proventriculus
Proventriculus_2	CG5084	CG5084	239	50	1116.67	2.15327	Set 1	8.46814	85.7507	cat_term:global_finito flag_for_volker no staining	no staining	no staining	no staining	no staining	esophagus no staining
Proventriculus_2	CG10154	CG10154	108	0	628.83	0	Set 1	9.29653	86.4467	cat_term:global_finito no staining	no staining	no staining	no staining	no staining	no staining
Proventriculus_2	CG34282	CG34282	169	14	636.897	0.443267	Set 1	8.78558	81.8568	cat_term:global_finito no staining	no staining	no staining	no staining	no staining	no staining
Proventriculus_2	obst-J	CG7348	180	67	1006.61	2.59179	Set 1	8.13059	81.1167	flag_for_volker no staining	no staining	no staining	no staining	no staining	no staining proventriculus proventriculus inner layer
Proventriculus_2	CG7715	CG7715	1011	2657	4093.41	46.2884	Set 1	6.43567	77.2245	cat_term:global_finito maternal ubiquitous	faint ubiquitous list_4-6:ubiquitous ubiquitous	list_7-8:ubiquitous no staining ubiquitous	no staining ubiquitous	cat_term:finito11-12 no staining ubiquitous	cat_term:finito13-16 foregut proventriculus ubiquitous
Proventriculus_2	CG7252	CG7252	94	31	461.299	0.659234	Set 1	8.11904	71.8753	NA	NA	NA	NA	NA	NA
Proventriculus_2	Peritrophin-15a	CG17814	58	11	324.085	0.298487	Set 1	7.9634	66.4519	NA	NA	NA	NA	NA	NA
Proventriculus_2	Pgant4	CG31956	149	129	645.677	5.64711	Set 1	6.60194	61.6417	no staining	no staining	no staining	no staining	no staining	proventriculus
Proventriculus_2	Kaz-m1	CG8342	278	318	1311.45	15.2769	Set 1	6.33218	65.5891	cat_term:global_finito no staining	no staining	list_7-8:specific yolk nuclei	crystal cell SA head mesoderm PR yolk nuclei	ant midgut PR plasmatocytes A post midgut PR procrystal cell proventriculus PR yolk nuclei	cuprophilic cell midgut midgut chamber proventriculus
Proventriculus_2	Ms	CG6440	110	22	320.412	1.06374	Set 1	7.27852	60.6176	cat_term:global_finito	list_4-6:no staining no staining	list_7-8:no staining no staining	no staining	no staining	central brain neuron lateral cord neuron
Proventriculus_2	CG9988	CG9988	66	1	232.847	0.0228833	Set 1	7.8306	61.6223	no staining ubiquitous	no staining	no staining	no staining	no staining	no staining
Salivary_gland_PR	pip	CG9614	52031	6918	32339.7	261.052	Set 1	6.94731	104.078	cat_term:global_finito flag_for_volker no staining	list_4-6:no staining no staining	no staining	no staining salivary gland A	salivary gland body PR salivary gland PR	atrium dors/lateral sensory complexes epipharynx foregut post spiracle salivary gland salivary gland body
Salivary_gland_PR	nur	CG31813	29624	9599	19569.2	349.137	Set 1	5.80453	82.7515	maternal	maternal rapidly degraded	no staining	no staining	salivary gland PR	salivary gland
Salivary_gland_PR	CG14756	CG14756	16089	5930	10609.2	211.639	Set 1	5.64077	75.435	cat_term:global_finito	no staining	list_7-8:no staining no staining	no staining	salivary gland body PR	salivary gland salivary gland body
Salivary_gland_PR	CG13159	CG13159	7415	2683	4827.83	106.003	Set 1	5.49565	67.2528	cat_term:global_finito	list_4-6:no staining no staining	no staining	no staining	salivary gland body PR	salivary gland salivary gland body
Salivary_gland_PR	PH4alphaSG1	CG31014	1899	391	1225.47	12.6476	Set 1	6.48854	66.5744	NA	NA	NA	NA	circular visceral mesoderm PR salivary gland PR	circular visceral muscle fibers salivary gland
Salivary_gland_PR	CG34190	CG34190	1013	168	612.768	5.05287	Set 1	6.66158	61.6966	no staining	no staining	no staining	salivary gland A	salivary gland PR	anal pad salivary gland
Salivary_gland_PR	PH4alphaSG2	CG1546	1225	300	788.207	10.1599	Set 1	6.14218	59.1139	cat_term:global_finito	list_4-6:no staining no staining	no staining	no staining	salivary gland body PR	salivary gland salivary gland body
Salivary_gland_PR	CrzR	CG10698	1066	225	663.072	8.161	Set 1	6.17751	57.9154	maternal ubiquitous	list_4-6:ubiquitous ubiquitous	ubiquitous	ubiquitous	ubiquitous	cat_term:global_finito salivary gland salivary gland body ubiquitous
Salivary_gland_PR	GlcAT-P	CG6207	6465	4499	4091.6	195.038	Set 1	4.38346	52.5963	cat_term:global_finito maternal	AISN cellular blastoderm list_4-6:specific subset trunk mesoderm AISN	head mesoderm PR list_7-8:specific trunk mesoderm PR vent ectoderm PR	head mesoderm PR post endoderm PR	plasmatocytes A proventriculus PR salivary duct PR salivary gland body PR vent sensory complex SA	adult hindgut precursor garland cell head epidermis plasmatocytes post spiracle proventriculus salivary gland salivary gland body salivary gland common duct vent midline glia
Salivary_gland_PR	CG8708	CG8708	905	447	583.74	15.3969	Set 1	5.15383	47.3722	cat_term:global_finito	list_4-6:no staining no staining	list_7-8:no staining no staining	no staining	salivary gland body PR	salivary gland salivary gland body
Salivary_gland_PR	Gmap	CG33206	10558	11934	6760.01	550.864	Set 1	3.61464	45.9892	maternal ubiquitous	faint ubiquitous post	ant endoderm A post endoderm PR	ant endoderm PR post endoderm PR	anal pad SA ant midgut PR post midgut PR salivary gland PR	anal pad lymph gland midgut salivary gland
Salivary_gland_PR	sens	CG32120	1448	935	933.521	37.6348	Set 1	4.59471	45.341	cat_term:global_finito no staining	no staining	no staining	antennal PR2 clypeolabrum PR dors ectoderm PR no staining visual PR	(larval eye PR) antennal PR1 dors/lateral sensory complexes PR hypopharyngeal sense organ PR labial sensory complex PR labral sensory complex PR maxillary sensory complex PR no staining salivary gland PR vent sensory complex SA	dors/lateral sensory complexes no staining salivary gland sensory sys head vent sensory complex PR
Salivary_gland_PR	CrebA	CG7450	17206	25748	10770.8	1119.52	Set 1	3.26488	43.733	cat_term:global_finito no staining	AISN ant endoderm AISN cellular blastoderm head mesoderm A head mesoderm AISN list_4-6:specific subset yolk nuclei	amnioserosa A ant endoderm A head mesoderm PR hindgut A list_7-8:specific post endoderm PR yolk nuclei	amnioserosa amnioserosa PR ant endoderm PR dors ectoderm PR head mesoderm PR inclusive hindgut PR post endoderm PR yolk nuclei	amnioserosa dors epidermis PR foregut PR head mesoderm PR plasmatocytes A proventriculus PR salivary gland body PR tracheal PR trunk mesoderm PR vent epidermis PR	dors epidermis dors trunk head epidermis dors proventriculus salivary gland salivary gland body tracheal sys vent epidermis
Salivary_gland_PR	sll	CG7623	1246	876	800.621	35.9981	Set 1	4.4356	42.7892	maternal	ubiquitous	ubiquitous	ubiquitous	salivary gland PR ubiquitous	salivary gland ubiquitous
Salivary_gland_PR	ome	CG42280	5076	5820	3165.36	266.645	Set 1	3.56398	41.4441	cat_term:global_finito flag_for_volker no staining	list_4-6:no staining no staining	no staining	cat_term:finito9-10 no staining	no staining	foregut foregut sensory structure hindgut midgut no staining salivary gland salivary gland body tracheal sys
Salivary_gland_PR	Papss	CG8363	2245	2825	1441.87	98.481	Set 1	3.85738	40.4821	cat_term:global_finito maternal ubiquitous	list_4-6:no staining no staining	list_7-8:ubiquitous ubiquitous	ubiquitous	salivary gland body PR ubiquitous	dors epidermis head epidermis salivary gland salivary gland body vent epidermis
Somatic_muscle	bt	CG32019	71482	32232	35203.5	1347.27	Set 1	4.70654	71.0851	NA	list_4-6:no staining no staining	no staining	no staining	no staining	cat_term:global_finito dors prothoracic pharyngeal muscle muscle sys somatic muscle
Somatic_muscle	Zasp66	CG6416	3983	436	1604.21	17.7464	Set 1	6.41911	68.3541	cat_term:global_finito no staining	no staining	no staining	no staining	no staining post midgut PR	midgut no staining
Somatic_muscle	Mf	CG6803	16808	3267	5908.44	131.144	Set 1	5.48259	68.6903	cat_term:global_finito	list_4-6:no staining no staining	no staining	no staining	no staining	cat_term:global_finito muscle sys somatic muscle
Somatic_muscle	Mp20	CG4696	8213	1003	2632.83	37.9338	Set 1	6.07945	69.0805	cat_term:global_finito maternal no staining	list_4-6:no staining no staining	no staining	no staining	no staining	cat_term:global_finito dors prothoracic pharyngeal muscle longitudinal visceral muscle fibers muscle sys no staining somatic muscle visceral muscle visceral muscle of esophagus
Somatic_muscle	CG45078	CG45078	3808	394	1355.71	16.1691	Set 1	6.30309	65.5894	NA	NA	NA	NA	NA	NA
Somatic_muscle	sls	CG1915	41690	25621	20933.5	945.891	Set 1	4.46647	64.1099	cat_term:global_finito	list_4-6:no staining no staining	list_7-8:no staining no staining	no staining	no staining	ant spiracle brain central nervous sys dors prothoracic pharyngeal muscle muscle sys post spiracle somatic muscle vent nerve cord
Somatic_muscle	Unc-89	CG33519	2508	390	1040.84	15.0318	Set 1	6.02068	60.3568	cat_term:global_finito no staining	no staining	no staining	no staining	no staining	no staining
Somatic_muscle	CG43897	CG43897	10836	4396	5188.52	171.97	Set 1	4.90672	60.5558	cat_term:global_finito no staining	no staining	no staining	no staining	no staining	no staining
Somatic_muscle	CG5023	CG5023	1256	55	450.251	1.75696	Set 1	7.35151	64.824	cat_term:global_finito	list_4-6:no staining no staining	list_7-8:no staining no staining	cat_term:finito9-10 no staining	no staining	muscle sys
Somatic_muscle	CG9297	CG9297	2609	321	1022.12	12.8555	Set 1	6.20496	62.0419	no staining	list_4-6:no staining no staining	no staining	no staining	no staining	cat_term:global_finito muscle sys no staining somatic muscle
Somatic_muscle	Mhc	CG17927	56101	39064	21876.7	1585.98	Set 1	3.78505	54.5697	NA	NA	NA	NA	NA	NA
Somatic_muscle	CG45076	CG45076	2350	620	1088.18	26.3788	Set 1	5.31272	53.6001	no staining	list_4-6:no staining no staining	no staining	no staining	no staining	cat_term:global_finito muscle sys somatic muscle
Somatic_muscle	Prm	CG5939	17164	10371	6867.71	396.354	Set 1	4.11133	52.4023	faint ubiquitous flag_for_volker maternal	faint ubiquitous	no staining	no staining	cardiac mesoderm PR dors pharyngeal muscle PR	circulatory sys dors prothoracic pharyngeal muscle muscle sys somatic muscle visceral muscle
Somatic_muscle	Gapdh1	CG12055	7628	2352	2178.06	76.7592	Set 1	4.80789	53.317	cat_term:global_finito maternal ubiquitous	cellular blastoderm list_4-6:specific maternal pole cell	list_7-8:specific pole cell ubiquitous	ant endoderm PR germ cell head mesoderm PR trunk mesoderm PR ubiquitous	ant midgut PR cat_term:finito11-12 dors pharyngeal muscle PR germ cell head mesoderm PR muscle sys PR trunk mesoderm PR ubiquitous	crystal cell dors prothoracic pharyngeal muscle germ cell gonad midgut muscle sys sensory sys head somatic muscle vent epidermis vent sensory complex PR
Somatic_muscle	l(2)01289	CG9432	5385	2283	2392.73	105.867	Set 1	4.48477	50.3417	NA	NA	NA	NA	NA	NA
Somatic_muscle	Mpcp1	CG9090	1018	106	342.66	3.57498	Set 1	6.22687	52.4604	cat_term:global_finito maternal	maternal	ubiquitous	ubiquitous	NA	cat_term:endo_meso
Somatic_muscle	Mlc2	CG2184	32611	24192	10727.9	851.569	Set 1	3.65341	48.9163	NA	list_4-6:no staining no staining	list_7-8:no staining no staining	cat_term:finito9-10 no staining	no staining	cat_term:global_finito dors prothoracic pharyngeal muscle muscle sys somatic muscle visceral muscle
Somatic_muscle	Mlc1	CG5596	11480	5490	3755.48	209.485	Set 1	4.15721	49.3676	cat_term:global_finito	list_4-6:no staining no staining	no staining	no staining	no staining	dors prothoracic pharyngeal muscle muscle sys salivary gland somatic muscle visceral muscle
Somatic_muscle	Act57B	CG10067	48634	43565	16474.7	1481.84	Set 1	3.47382	48.6615	maternal	list_4-6:no staining maternal no staining	list_7-8:no staining list_7-8:ubiquitous no staining ubiquitous	cat_term:finito9-10 no staining ubiquitous	dors pharyngeal muscle PR muscle sys PR somatic muscle PR visceral muscle PR	cat_term:global_finito dors prothoracic pharyngeal muscle muscle sys somatic muscle visceral muscle
Somatic_muscle	CG8888	CG8888	3446	2070	1910.06	83.4673	Set 1	4.49908	49.0407	cat_term:global_finito	list_4-6:no staining no staining	list_7-8:no staining no staining	cat_term:finito9-10 no staining	cat_term:finito11-12 corpus allatum PR no staining	cat_term:finito13-16 corpus allatum muscle sys ring gland somatic muscle
Head_trunk_mesoderm_PR	lmd	CG4677	3465	2762	1961.33	115.199	Set 1	4.07716	44.5974	cat_term:global_finito	list_4-6:no staining no staining	list_7-8:no staining no staining trunk mesoderm PR	head mesoderm PR no staining trunk mesoderm PR	dors pharyngeal muscle PR longitudinal visceral mesoderm PR muscle sys PR somatic muscle PR visceral muscle PR	dors prothoracic pharyngeal muscle muscle sys somatic muscle
Head_trunk_mesoderm_PR	sns	CG33141	3101	5395	1681.86	230.98	Set 1	2.85798	30.6282	NA	NA	NA	NA	NA	NA
Head_trunk_mesoderm_PR	Rim2	CG18317	2292	4702	1218.48	181.218	Set 1	2.74134	28.1044	cat_term:global_finito maternal	no staining	no staining	no staining	no staining	no staining
Head_trunk_mesoderm_PR	Kah	CG17181	1288	2039	700.429	81.3915	Set 1	3.08767	29.1913	cat_term:global_finito maternal no staining	no staining ubiquitous	no staining ubiquitous	ant endoderm PR head mesoderm PR no staining post endoderm PR trunk mesoderm PR ubiquitous	dors pharyngeal muscle PR faint ubiquitous head visceral muscle PR muscle sys PR somatic muscle PR visceral muscle PR	faint ubiquitous midgut muscle sys
Head_trunk_mesoderm_PR	Gyc32E	CG33114	433	521	229.995	19.238	Set 1	3.50646	27.5318	NA	NA	NA	NA	NA	NA
Head_trunk_mesoderm_PR	kirre	CG3653	5774	15052	3133.4	692.968	Set 1	2.17479	25.2579	no staining	no staining	no staining	no staining	no staining	no staining
Head_trunk_mesoderm_PR	Mef2	CG1429	4185	13014	2266	506.819	Set 1	2.15776	24.0517	cat_term:global_finito maternal	cellular blastoderm faint ubiquitous list_4-6:ubiquitous ubiquitous	ant endoderm A head mesoderm PR list_7-8:specific trunk mesoderm PR	head mesoderm PR trunk mesoderm PR	cardiac mesoderm PR cat_term:finito11-12 dors pharyngeal muscle PR dors vessel SA longitudinal visceral mesoderm PR muscle sys PR somatic muscle PR trunk mesoderm PR visceral muscle PR	circular visceral muscle fibers dors prothoracic pharyngeal muscle dors vessel longitudinal visceral muscle fibers muscle sys somatic muscle visceral muscle
Head_trunk_mesoderm_PR	sing	CG13011	265	304	144.156	12.6207	Set 1	3.40376	24.444	NA	list_4-6:no staining no staining	list_7-8:no staining no staining	cat_term:finito9-10 no staining	muscle sys PR somatic muscle PR visceral muscle PR	cat_term:global_finito dors prothoracic pharyngeal muscle longitudinal visceral muscle fibers muscle sys somatic muscle visceral muscle
Head_trunk_mesoderm_PR	ltl	CG32372	717	1424	392.337	58.0648	Set 1	2.73172	23.5464	cat_term:global_finito	ant endoderm AISN cellular blastoderm list_4-6:specific mesoderm AISN subset trunk mesoderm AISN	ant endoderm A head mesoderm PR list_7-8:specific post endoderm PR trunk mesoderm PR	head mesoderm PR trunk mesoderm PR	dors pharyngeal muscle PR head mesoderm PR somatic muscle PR trunk mesoderm PR	brain dors prothoracic pharyngeal muscle fat body vent nerve cord
Head_trunk_mesoderm_PR	CG15468	CG15468	92	63	53.157	2.54994	Set 1	3.90439	22.4857	NA	NA	NA	NA	NA	NA
Head_trunk_mesoderm_PR	Rbfox1	CG32062	13640	51901	7408.4	2257.79	Set 1	1.71361	22.0287	no staining	no staining	no staining	no staining	dors pharyngeal muscle PR no staining somatic muscle PR	dors prothoracic pharyngeal muscle no staining somatic muscle
Head_trunk_mesoderm_PR	CG8641	CG8641	276	491	158.683	19.9516	Set 1	2.92102	21.3791	NA	NA	NA	NA	NA	NA
Head_trunk_mesoderm_PR	Or69a	CG33264	69	22	38.9207	1.12828	Set 1	4.19278	22.3016	NA	NA	NA	NA	NA	NA
Head_trunk_mesoderm_PR	CG42750	CG42750	670	1444	376.876	61.0803	Set 1	2.60188	22.2767	no staining	no staining	no staining	no staining	no staining	no staining
Head_trunk_mesoderm_PR	CG6356	CG6356	590	1359	324.357	58.5386	Set 1	2.44569	20.4114	NA	NA	NA	NA	NA	NA
Head_trunk_mesoderm_PR	ewg	CG3114	3224	10956	1721.58	475.355	Set 1	1.85362	19.9271	maternal no staining	no staining ubiquitous	no staining	no staining	dors pharyngeal muscle PR head mesoderm PR no staining somatic muscle PR visceral muscle PR	brain no staining somatic muscle vent nerve cord visceral muscle
Head_trunk_mesoderm_PR	NK7.1	CG8524	2586	8159	1387.63	376.018	Set 1	1.87992	19.6253	cat_term:global_finito maternal	list_4-6:no staining no staining post endoderm AISN	list_7-8:no staining no staining post endoderm PR	no staining	ant midgut PR head mesoderm PR no staining post midgut PR post spiracle SA trunk mesoderm PR	cat_term:global_finito labral sensory complex midgut chamber post spiracle procephalic vascular rudiment proventriculus somatic muscle
Head_trunk_mesoderm_PR	CG32106	CG32106	97	119	56.1203	4.26691	Set 1	3.41349	19.9209	NA	NA	NA	NA	NA	NA
Head_trunk_mesoderm_PR	hbs	CG7449	2554	8427	1386.82	362.195	Set 1	1.93297	20.1775	no staining	no staining	no staining	no staining	no staining	no staining
Head_trunk_mesoderm_PR	CG9650	CG9650	4316	15990	2365.42	679.567	Set 1	1.79728	20.1448	cat_term:global_finito maternal no staining	faint ubiquitous no staining	no staining	no staining procephalic ectoderm PR	brain PR foregut PR muscle sys PR no staining vent nerve cord PR	brain dors/lateral sensory complexes no staining proventriculus sensory sys head vent nerve cord vent sensory complex PR
Tracheal_system_1	rdo	CG15151	2813	1124	7206.46	49.3369	Set 1	7.16153	91.777	cat_term:global_finito	list_4-6:no staining no staining	no staining	no staining	no staining	brain dors epidermis pericardial cell tracheal sys vent epidermis vent sensory complex PR
Tracheal_system_1	wdp	CG3413	575	1741	1510.05	69.3501	Set 1	4.4239	46.7223	no staining	no staining	no staining	no staining	no staining	no staining
Tracheal_system_1	Gasp	CG10287	3088	17378	7879.82	720.794	Set 1	3.4485	44.6379	cat_term:global_finito	AISN ectoderm AISN list_4-6:specific procephalic ectoderm AISN subset	list_7-8:no staining no staining	Malpighian tubule A	tracheal PR	crystal cell foregut salivary gland common duct salivary gland duct tracheal sys
Tracheal_system_1	Osi15	CG1157	3167	18250	8026.11	751.299	Set 1	3.41532	44.299	NA	list_4-6:no staining no staining	list_7-8:no staining no staining	no staining	no staining	cat_term:global_finito dors branch dors trunk post spiracle tracheal sys visceral branch
Tracheal_system_1	stumps	CG31317	1257	5487	3228.64	230.149	Set 1	3.80403	44.3442	cat_term:finito1-3 cat_term:global_finito maternal no staining	ant endoderm AISN cat_term:finito4-6 cellular blastoderm head mesoderm AISN list_4-6:specific mesoderm AISN no staining trunk mesoderm AISN	ant endoderm A cat_term:finito7-8 head mesoderm PR list_7-8:specific no staining trunk mesoderm PR yolk nuclei	ant endoderm PR cat_term:finito9-10 head mesoderm PR no staining trunk mesoderm PR	cat_term:finito11-12 circular visceral mesoderm PR head mesoderm PR no staining tracheal PR visceral muscle PR	cat_term:finito13-16 dors prothoracic pharyngeal muscle no staining tracheal sys visceral muscle visceral muscle of esophagus
Tracheal_system_1	CG5835	CG5835	263	729	697.124	31.1763	Set 1	4.43734	41.9211	maternal	ubiquitous	no staining ubiquitous	no staining ubiquitous	post spiracle SA ubiquitous	anal pad ant spiracle dors vessel epipharynx esophagus head epidermis hypopharynx midgut chamber post spiracle tracheal sys ubiquitous vent nerve cord visceral muscle
Tracheal_system_1	apn	CG15887	538	2149	1350.95	85.0783	Set 1	3.97218	41.3139	cat_term:global_finito	list_4-6:no staining no staining	list_7-8:no staining no staining	no staining	no staining	tracheal sys
Tracheal_system_1	sano	CG12758	1618	9461	4048.62	422.042	Set 1	3.25856	39.0492	maternal	cellular blastoderm list_4-6:ubiquitous no staining	list_7-8:no staining no staining	cat_term:finito9-10 no staining	cat_term:finito11-12 clypeo-labral PR foregut PR hypopharyngeal sense organ PR optic lobe PR salivary gland body PR salivary gland PR tracheal PR	atrium cat_term:finito13-16 cat_term:global_finito dors epidermis head epidermis hypopharynx optic lobe vent epidermis
Tracheal_system_1	CG7512	CG7512	75	130	199.326	4.67926	Set 1	5.13328	39.2501	NA	NA	NA	NA	NA	NA
Tracheal_system_1	CG11786	CG11786	207	530	549.924	26.5289	Set 1	4.32021	39.3386	maternal ubiquitous	no staining ubiquitous	no staining ubiquitous	no staining ubiquitous	no staining ubiquitous	cat_term:global_finito dors trunk ubiquitous
Tracheal_system_1	Spn43Aa	CG12172	1166	7712	3022.56	343.431	Set 1	3.13348	36.2294	cat_term:global_finito	no staining	list_7-8:no staining no staining	no staining	clypeo-labral PR dors epidermis PR salivary common duct PR salivary duct PR tracheal PR	clypeolabrum dors epidermis salivary gland common duct salivary gland duct tracheal sys
Tracheal_system_1	knrl	CG4761	871	5403	2145.58	230.554	Set 1	3.21195	35.5493	cat_term:global_finito flag_for_volker	ant endoderm AISN dors ectoderm AISN foregut AISN head mesoderm A head mesoderm AISN list_4-6:specific procephalic ectoderm AISN subset vent ectoderm AISN	ant endoderm A foregut A head mesoderm PR list_7-8:specific procephalic ectoderm A	ant endoderm PR dors ectoderm PR foregut PR head mesoderm PR procephalic ectoderm PR vent ectoderm PR	adult hindgut SA dors epidermis PR fat body/gonad PR foregut PR hindgut proper PR rectum SA small intestine SA tracheal PR vent epidermis PR	adult hindgut precursor atrium dors epidermis epipharynx esophagus foregut foregut sensory structure gonad head epidermis hindgut labral sensory complex Malpighian tubule tip cell rectum sensory sys head small intestine tracheal sys vent epidermis visceral branch
Tracheal_system_1	bs	CG3411	271	1257	679.253	48.7181	Set 1	3.7721	35.4952	maternal no staining	maternal pole plasm ubiquitous	faint ubiquitous	faint ubiquitous	faint ubiquitous	faint ubiquitous garland cell somatic muscle tracheal sys visceral muscle
Tracheal_system_1	form3	CG33556	379	1896	958.806	82.5002	Set 1	3.52139	34.885	NA	NA	NA	NA	NA	NA
Tracheal_system_1	raskol	CG42684	1674	12899	4231.16	568.1	Set 1	2.8943	34.8682	faint ubiquitous flag_as_nonspecific maternal	faint ubiquitous maternal	faint ubiquitous	faint ubiquitous	faint ubiquitous no staining	faint ubiquitous no staining
Tracheal_system_1	uif	CG9138	2253	19920	5571.62	836.569	Set 1	2.73381	34.02	NA	NA	NA	NA	NA	NA
Tracheal_system_1	Cpr51A	CG10112	400	2660	1019.35	112.374	Set 1	3.16849	31.6686	cat_term:global_finito no staining	list_4-6:no staining no staining	list_7-8:no staining no staining	cat_term:finito9-10 no staining	no staining	dors epidermis esophagus head epidermis post spiracle tracheal sys tracheole vent epidermis visceral branch
Tracheal_system_1	CG9503	CG9503	257	1447	666.826	59.2651	Set 1	3.46792	32.5406	NA	list_4-6:no staining no staining	list_7-8:no staining no staining	no staining	no staining	cat_term:global_finito dors trunk tracheal sys
Tracheal_system_1	exp	CG13188	500	3652	1277.55	163.51	Set 1	2.95713	30.5185	NA	list_4-6:no staining	NA	NA	dors trunk SA tracheal PR	cat_term:global_finito dors epidermis head epidermis tracheal sys vent epidermis
Tracheal_system_1	Buffy	CG8238	74	210	182.198	9.76689	Set 1	4.08083	30.6766	cat_term:global_finito no staining	no staining	no staining	no staining	no staining	no staining
Tracheal_system_2	Gasp	CG10287	8626	16572	9427.94	655.121	Set 1	3.84491	50.7639	cat_term:global_finito	AISN ectoderm AISN list_4-6:specific procephalic ectoderm AISN subset	list_7-8:no staining no staining	Malpighian tubule A	tracheal PR	crystal cell foregut salivary gland common duct salivary gland duct tracheal sys
Tracheal_system_2	Cht5	CG9307	1035	930	1150.17	37.0702	Set 1	4.91705	50.0009	cat_term:global_finito	list_4-6:no staining no staining	list_7-8:no staining no staining	no staining	tracheal PR	tracheal sys
Tracheal_system_2	Spn43Aa	CG12172	4029	6817	4540.55	287.868	Set 1	3.97439	48.2847	cat_term:global_finito	no staining	list_7-8:no staining no staining	no staining	clypeo-labral PR dors epidermis PR salivary common duct PR salivary duct PR tracheal PR	clypeolabrum dors epidermis salivary gland common duct salivary gland duct tracheal sys
Tracheal_system_2	CG12009	CG12009	3159	5180	3434.71	202.946	Set 1	4.07393	47.854	NA	list_4-6:no staining no staining	list_7-8:no staining no staining	no staining	tracheal PR	cat_term:global_finito dors trunk tracheal sys visceral branch
Tracheal_system_2	wat	CG1443	1468	1842	1597.38	77.2817	Set 1	4.35089	46.3039	NA	NA	NA	NA	NA	NA
Tracheal_system_2	Osi15	CG1157	6479	17277	6994.25	690.243	Set 1	3.3389	42.645	NA	list_4-6:no staining no staining	list_7-8:no staining no staining	no staining	no staining	cat_term:global_finito dors branch dors trunk post spiracle tracheal sys visceral branch
Tracheal_system_2	CG13272	CG13272	753	1050	804.726	44.3429	Set 1	4.14955	40.0603	flag_for_volker no staining	no staining	no staining	no staining	no staining	esophagus fat body tracheal sys
Tracheal_system_2	CG11786	CG11786	454	463	499.337	22.6213	Set 1	4.40186	39.4704	maternal ubiquitous	no staining ubiquitous	no staining ubiquitous	no staining ubiquitous	no staining ubiquitous	cat_term:global_finito dors trunk ubiquitous
Tracheal_system_2	CG13676	CG13676	888	1874	983.49	75.4466	Set 1	3.68539	36.6446	NA	list_4-6:no staining no staining	no staining	no staining	no staining	cat_term:global_finito tracheal sys
Tracheal_system_2	CG9812	CG9812	316	540	357.29	21.2922	Set 1	4.00248	33.961	cat_term:global_finito	list_4-6:no staining no staining	no staining	no staining	no staining	dors trunk tracheal sys visceral branch
Tracheal_system_2	verm	CG8756	7317	34181	8112.1	1401.65	Set 1	2.53192	32.8796	no staining	no staining	no staining	no staining	ant spiracle SA dors trunk SA post spiracle SA primary segmental branch SA tracheal PR visceral branch SA	ant spiracle dors branch dors trunk post spiracle tracheal sys visceral branch
Tracheal_system_2	trh	CG42865	1341	3948	1470.67	155.455	Set 1	3.23266	34.0181	cat_term:global_finito	list_4-6:no staining no staining	list_7-8:no staining no staining	no staining salivary gland A tracheal sys A	cat_term:finito11-12 no staining salivary gland PR tracheal PR	brain cat_term:finito13-16 central brain neuron central nervous sys lateral cord neuron salivary gland common duct salivary gland duct tracheal sys vent nerve cord
Tracheal_system_2	Cyp313b1	CG9716	161	184	176.727	7.31236	Set 1	4.41012	32.9591	cat_term:global_finito no staining	list_4-6:no staining no staining	no staining	no staining	no staining	dors branch tracheal sys visceral branch
Tracheal_system_2	obst-A	CG17052	2012	6871	2209	276.228	Set 1	2.99424	33.2656	cat_term:global_finito	list_4-6:no staining no staining	list_7-8:no staining no staining	cat_term:finito9-10 no staining	ant spiracle SA dors trunk SA no staining post spiracle SA primary segmental branch SA tracheal PR visceral branch SA	ant spiracle dors branch dors epidermis dors trunk epipharynx head epidermis hypopharynx post spiracle ring gland tracheal sys visceral branch
Tracheal_system_2	obst-B	CG4778	289	490	333.405	22.4412	Set 1	3.83015	32.1176	cat_term:global_finito	list_4-6:no staining no staining	list_7-8:no staining no staining	cat_term:finito9-10 no staining	no staining	atrium dors branch dors epidermis dors trunk head epidermis hypopharynx tracheal sys vent epidermis visceral branch
Tracheal_system_2	reb	CG13183	177	261	190.412	10.1459	Set 1	4.09453	31.0387	flag_for_volker no staining	no staining	no staining	cat_term:finito9-10 no staining	dors epidermis PR tracheal PR	anal pad cat_term:global_finito dors epidermis dors trunk head epidermis hypopharynx tracheal sys vent epidermis
Tracheal_system_2	CG6696	CG6696	194	328	230.914	13.5269	Set 1	3.99056	31.3557	NA	NA	NA	NA	NA	NA
Tracheal_system_2	CG10936	CG10936	1890	6440	2066.44	292.6	Set 1	2.81522	31.0058	cat_term:global_finito no staining	list_4-6:no staining no staining	list_7-8:no staining no staining	cat_term:finito9-10 no staining	dors trunk SA faint ubiquitous no staining	dors epidermis dors trunk epipharynx esophagus foregut hypopharynx no staining tracheal sys vent epidermis
Tracheal_system_2	sm	CG9218	11046	55541	11855.6	2427.59	Set 1	2.28738	30.956	flag_for_volker no staining	list_4-6:no staining no staining	list_7-8:no staining no staining	no staining	brain PR clypeo-labral PR no staining vent nerve cord PR	brain cat_term:global_finito central nervous sys labral sensory complex vent nerve cord
Tracheal_system_2	exp	CG13188	1128	3542	1216.59	154.369	Set 1	2.96907	30.4324	NA	list_4-6:no staining	NA	NA	dors trunk SA tracheal PR	cat_term:global_finito dors epidermis head epidermis tracheal sys vent epidermis
Tracheal_PR	btl	CG32134	528	954	842.557	38.766	Set 1	4.40517	42.8197	NA	NA	NA	NA	NA	NA
Tracheal_PR	knrl	CG4761	1633	5095	2512.32	219.679	Set 1	3.509	39.6355	cat_term:global_finito flag_for_volker	ant endoderm AISN dors ectoderm AISN foregut AISN head mesoderm A head mesoderm AISN list_4-6:specific procephalic ectoderm AISN subset vent ectoderm AISN	ant endoderm A foregut A head mesoderm PR list_7-8:specific procephalic ectoderm A	ant endoderm PR dors ectoderm PR foregut PR head mesoderm PR procephalic ectoderm PR vent ectoderm PR	adult hindgut SA dors epidermis PR fat body/gonad PR foregut PR hindgut proper PR rectum SA small intestine SA tracheal PR vent epidermis PR	adult hindgut precursor atrium dors epidermis epipharynx esophagus foregut foregut sensory structure gonad head epidermis hindgut labral sensory complex Malpighian tubule tip cell rectum sensory sys head small intestine tracheal sys vent epidermis visceral branch
Tracheal_PR	CG32447	CG32447	908	2600	1405.96	120.724	Set 1	3.52987	36.9166	flag_for_volker no staining	cellular blastoderm dors ectoderm A vent ectoderm AISN	dors ectoderm PR vent ectoderm PR	tracheal sys A	foregut PR tracheal PR	esophagus foregut post spiracle tracheal sys
Tracheal_PR	trh	CG42865	1004	3895	1553.83	154.679	Set 1	3.31918	35.1917	cat_term:global_finito	list_4-6:no staining no staining	list_7-8:no staining no staining	no staining salivary gland A tracheal sys A	cat_term:finito11-12 no staining salivary gland PR tracheal PR	brain cat_term:finito13-16 central brain neuron central nervous sys lateral cord neuron salivary gland common duct salivary gland duct tracheal sys vent nerve cord
Tracheal_PR	Hs6st	CG4451	2439	12907	3797.48	598.95	Set 1	2.66213	31.6559	cat_term:global_finito maternal	cellular blastoderm list_4-6:ubiquitous maternal	list_7-8:no staining no staining	dors ectoderm PR no staining	dors epidermis PR tracheal PR	dors prothoracic pharyngeal muscle dors vessel prothoracic gland ring gland tracheal sys
Tracheal_PR	dpy	CG33196	4206	27964	6513.31	1214.67	Set 1	2.42164	30.6807	cat_term:global_finito	list_4-6:no staining no staining	no staining	cat_term:finito9-10 no staining	foregut PR hindgut proper PR tracheal PR	ant spiracle dors branch dors trunk esophagus garland cell hindgut large intestine pericardial cell post spiracle proventriculus rectum small intestine tracheal sys
Tracheal_PR	stumps	CG31317	1157	5616	1808.8	239.543	Set 1	2.91067	31.4981	cat_term:finito1-3 cat_term:global_finito maternal no staining	ant endoderm AISN cat_term:finito4-6 cellular blastoderm head mesoderm AISN list_4-6:specific mesoderm AISN no staining trunk mesoderm AISN	ant endoderm A cat_term:finito7-8 head mesoderm PR list_7-8:specific no staining trunk mesoderm PR yolk nuclei	ant endoderm PR cat_term:finito9-10 head mesoderm PR no staining trunk mesoderm PR	cat_term:finito11-12 circular visceral mesoderm PR head mesoderm PR no staining tracheal PR visceral muscle PR	cat_term:finito13-16 dors prothoracic pharyngeal muscle no staining tracheal sys visceral muscle visceral muscle of esophagus
Tracheal_PR	Reck	CG5392	329	1122	490.361	48.3252	Set 1	3.31345	29.6243	NA	NA	NA	NA	NA	NA
Tracheal_PR	Pvf1	CG7103	378	1521	618.79	69.5639	Set 1	3.13245	29.0554	cat_term:global_finito maternal	list_4-6:no staining no staining	list_7-8:no staining no staining	cat_term:finito9-10 no staining	anal pad SA salivary gland PR vent epidermis PR	Malpighian tubule proventriculus salivary gland
Tracheal_PR	verm	CG8756	4267	34335	6751.04	1438.42	Set 1	2.22962	28.3633	no staining	no staining	no staining	no staining	ant spiracle SA dors trunk SA post spiracle SA primary segmental branch SA tracheal PR visceral branch SA	ant spiracle dors branch dors trunk post spiracle tracheal sys visceral branch
Tracheal_PR	CG16959	CG16959	147	563	232.875	23.1788	Set 1	3.26774	25.7158	cat_term:global_finito	list_4-6:no staining no staining	list_7-8:no staining no staining	no staining	dors trunk SA esophagus PR P1 hindgut proper PR primary segmental branch SA tracheal PR visceral branch SA	dors branch esophagus head epidermis large intestine tracheal sys visceral branch
Tracheal_PR	Spn43Aa	CG12172	1190	7646	1870.38	339.839	Set 1	2.45616	26.6982	cat_term:global_finito	no staining	list_7-8:no staining no staining	no staining	clypeo-labral PR dors epidermis PR salivary common duct PR salivary duct PR tracheal PR	clypeolabrum dors epidermis salivary gland common duct salivary gland duct tracheal sys
Tracheal_PR	form3	CG33556	385	1922	625.489	85.4487	Set 1	2.85507	26.5269	NA	NA	NA	NA	NA	NA
Tracheal_PR	aop	CG3166	2482	22651	3894.22	886.009	Set 1	2.13431	25.457	cat_term:finito1-3 maternal no staining	cat_term:finito4-6 dors ectoderm AISN faint ubiquitous list_4-6:specific procephalic ectoderm AISN ubiquitous vent ectoderm AISN	cat_term:finito7-8 faint ubiquitous list_7-8:specific strong ubiquitous	cat_term:finito9-10 no staining strong ubiquitous	cat_term:global_finito strong ubiquitous trunk mesoderm PR	cat_term:global_finito no staining strong ubiquitous
Tracheal_PR	Pura	CG33275	668	4131	1061.21	186.809	Set 1	2.49837	25.1158	cat_term:global_finito maternal no staining	list_4-6:ubiquitous no staining	list_7-8:no staining no staining	cat_term:finito9-10 no staining	no staining optic lobe PR salivary gland PR tracheal PR	cat_term:global_finito dors epidermis head epidermis head epidermis dors leading edge cell no staining tracheal sys vent epidermis vent midline
Tracheal_PR	sano	CG12758	1266	9750	1974.25	432.393	Set 1	2.18756	23.949	maternal	cellular blastoderm list_4-6:ubiquitous no staining	list_7-8:no staining no staining	cat_term:finito9-10 no staining	cat_term:finito11-12 clypeo-labral PR foregut PR hypopharyngeal sense organ PR optic lobe PR salivary gland body PR salivary gland PR tracheal PR	atrium cat_term:finito13-16 cat_term:global_finito dors epidermis head epidermis hypopharynx optic lobe vent epidermis
Tracheal_PR	CG14301	CG14301	58	155	93.0525	6.58735	Set 1	3.61638	23.7068	NA	NA	NA	NA	NA	NA
Tracheal_PR	rdo	CG15151	346	1526	495.494	74.3377	Set 1	2.71742	24.3362	cat_term:global_finito	list_4-6:no staining no staining	no staining	no staining	no staining	brain dors epidermis pericardial cell tracheal sys vent epidermis vent sensory complex PR
Tracheal_PR	Cda4	CG32499	888	6757	1329.85	284.248	Set 1	2.22097	23.0495	cat_term:global_finito	list_4-6:no staining no staining	no staining	no staining	dors trunk SA primary segmental branch SA salivary duct PR tracheal PR	atrium dors branch dors epidermis dors trunk esophagus head epidermis post spiracle tracheal sys vent epidermis visceral branch
Tracheal_PR	heph	CG31000	3559	35088	5613.82	1498.64	Set 1	1.90437	23.719	cat_term:global_finito maternal	list_4-6:ubiquitous ubiquitous	faint ubiquitous list_7-8:ubiquitous	faint ubiquitous foregut PR	faint ubiquitous foregut PR hindgut proper PR tracheal PR	brain central brain glia faint ubiquitous lateral cord glia vent nerve cord
Tracheal_system_3	Osi15	CG1157	25471	13354	22900.8	501.731	Set 1	5.50947	79.7946	NA	list_4-6:no staining no staining	list_7-8:no staining no staining	no staining	no staining	cat_term:global_finito dors branch dors trunk post spiracle tracheal sys visceral branch
Tracheal_system_3	Osi9	CG15592	11809	5233	11003.4	201.294	Set 1	5.76535	77.4045	NA	list_4-6:no staining no staining	no staining	no staining	no staining	cat_term:global_finito dors branch dors trunk esophagus post spiracle salivary gland common duct salivary gland duct tracheal sys visceral branch
Tracheal_system_3	Osi20	CG15188	10159	5202	9539.74	182.899	Set 1	5.69696	75.3132	cat_term:global_finito	list_4-6:no staining no staining	list_7-8:no staining no staining	cat_term:finito9-10 no staining	no staining	dors branch dors trunk salivary gland common duct salivary gland duct tracheal sys tracheole visceral branch
Tracheal_system_3	CG12723	CG12723	3655	1398	3441.89	49.4042	Set 1	6.09351	71.5952	maternal	cellular blastoderm ubiquitous	no staining	no staining	no staining	cat_term:global_finito dors branch dors trunk tracheal sys visceral branch
Tracheal_system_3	Osi19	CG15189	5602	2602	5146.79	90.2096	Set 1	5.81834	71.7386	no staining	no staining	list_7-8:specific no staining	no staining procephalic ectoderm PR vent nerve cord PR P3	no staining	dors epidermis garland cell no staining tracheal sys vent epidermis
Tracheal_system_3	Osi18	CG1169	5319	2947	4931.82	106.191	Set 1	5.52387	67.7679	cat_term:global_finito	list_4-6:no staining no staining	no staining	no staining	no staining	tracheal sys
Tracheal_system_3	CG42749	CG42749	1338	389	1325.87	15.4406	Set 1	6.33354	65.7029	cat_term:global_finito flag_for_volker no staining	list_4-6:no staining no staining	no staining	no staining	antennal PR1 no staining	antennal sense organ dors branch dors trunk tracheal sys
Tracheal_system_3	CG12009	CG12009	6202	4606	5890.14	177.463	Set 1	5.04461	63.1803	NA	list_4-6:no staining no staining	list_7-8:no staining no staining	no staining	tracheal PR	cat_term:global_finito dors trunk tracheal sys visceral branch
Tracheal_system_3	CG7201	CG7201	843	232	794.284	7.79999	Set 1	6.49601	62.5912	cat_term:global_finito maternal	maternal	no staining	no staining	no staining	no staining
Tracheal_system_3	CG32548	CG32548	1665	776	1526.05	25.3805	Set 1	5.85419	61.9171	cat_term:global_finito no staining	no staining	no staining	no staining	no staining	dors branch dors trunk tracheal sys visceral branch
Tracheal_system_3	Mal-B1	CG14934	303	57	306.679	2.09729	Set 1	6.62958	54.7953	NA	NA	NA	NA	NA	NA
Tracheal_system_3	CG13272	CG13272	1525	960	1468.12	39.1286	Set 1	5.19319	54.6362	flag_for_volker no staining	no staining	no staining	no staining	no staining	esophagus fat body tracheal sys
Tracheal_system_3	CG13049	CG13049	1613	1392	1537.89	49.9706	Set 1	4.91514	52.0399	cat_term:global_finito maternal ubiquitous	faint ubiquitous list_4-6:ubiquitous ubiquitous	faint ubiquitous list_7-8:ubiquitous ubiquitous	faint ubiquitous ubiquitous	ant midgut PR post midgut PR ubiquitous	dors branch dors trunk midgut post spiracle tracheal sys visceral branch
Tracheal_system_3	wat	CG1443	2035	1629	1873.36	68.9207	Set 1	4.74376	51.575	NA	NA	NA	NA	NA	NA
Tracheal_system_3	CG11786	CG11786	885	445	826.602	22.3158	Set 1	5.14781	49.8967	maternal ubiquitous	no staining ubiquitous	no staining ubiquitous	no staining ubiquitous	no staining ubiquitous	cat_term:global_finito dors trunk ubiquitous
Tracheal_system_3	Twdlbeta	CG8986	780	704	710.414	25.4991	Set 1	4.74464	44.9533	NA	NA	NA	NA	NA	NA
Tracheal_system_3	CG13048	CG13048	515	326	488.616	10.796	Set 1	5.37233	48.0045	NA	NA	NA	NA	NA	NA
Tracheal_system_3	apn	CG15887	1972	1945	1710.8	72.5802	Set 1	4.53921	48.757	cat_term:global_finito	list_4-6:no staining no staining	list_7-8:no staining no staining	no staining	no staining	tracheal sys
Tracheal_system_3	CG13003	CG13003	1766	1856	1732.86	80.9966	Set 1	4.40144	47.3585	cat_term:finito1-3 cat_term:global_finito no staining	cat_term:finito4-6 list_4-6:no staining no staining	cat_term:finito7-8 no staining	cat_term:finito9-10 no staining	cat_term:finito11-12 head mesoderm PR	cat_term:finito13-16 proventriculus
Tracheal_system_3	CG14752	CG14752	291	143	283.166	5.69264	Set 1	5.40293	44.037	NA	NA	NA	NA	NA	NA
Progenitor_cells_1	eEF2	CG2238	18613	83662	8004.46	2793.56	Set 1	1.51818	19.6859	cat_term:global_finito maternal ubiquitous	ubiquitous	ubiquitous	ubiquitous	ubiquitous	ubiquitous
Progenitor_cells_1	betaTub60D	CG3401	3973	14728	1705.08	529.802	Set 1	1.68359	18.0758	cat_term:finito1-3 cat_term:global_finito	cat_term:finito4-6 list_4-6:no staining no staining	cat_term:finito7-8 no staining	cat_term:finito9-10 head mesoderm PR trunk mesoderm PR	cat_term:finito11-12 dors pharyngeal muscle PR head mesoderm PR muscle sys PR plasmatocytes A somatic muscle PR trunk mesoderm PR visceral muscle PR	adult muscle precursor PR cat_term:finito13-16 dors prothoracic pharyngeal muscle dors vessel muscle sys plasmatocytes somatic muscle visceral muscle
Progenitor_cells_1	eEF1alpha1	CG8280	43717	224976	18223	7729.48	Set 1	1.23713	17.5098	ubiquitous	ubiquitous	ubiquitous	ubiquitous	ubiquitous	ubiquitous
Progenitor_cells_1	Hsc70-4	CG4264	11573	56000	4938.21	1911.18	Set 1	1.36877	16.7949	cat_term:global_finito maternal ubiquitous	maternal ubiquitous	ubiquitous	ubiquitous	ubiquitous	ubiquitous
Progenitor_cells_1	Non1	CG8801	4847	21358	2011.33	706.495	Set 1	1.50736	16.5427	cat_term:global_finito maternal	ubiquitous	ubiquitous	ubiquitous	ubiquitous	ubiquitous
Progenitor_cells_1	RpL7A	CG3314	12416	64455	5109.68	2105.36	Set 1	1.27848	15.75	does_not_fit_array no staining ubiquitous	no staining ubiquitous	no staining ubiquitous	no staining ubiquitous	no staining ubiquitous	no staining ubiquitous
Progenitor_cells_1	RpL4	CG5502	8295	41375	3473	1390.95	Set 1	1.31907	15.5154	cat_term:global_finito maternal ubiquitous	maternal ubiquitous	ubiquitous	ubiquitous	ubiquitous	ubiquitous
Progenitor_cells_1	eIF3c	CG4954	1723	6995	738.966	232.64	Set 1	1.66122	15.8336	maternal strong ubiquitous	strong ubiquitous	strong ubiquitous	ubiquitous	strong ubiquitous	brain strong ubiquitous vent nerve cord
Progenitor_cells_1	eIF4A	CG9075	8633	44270	3579.28	1474.97	Set 1	1.278	15.0879	cat_term:global_finito maternal	ubiquitous	ubiquitous	ubiquitous	ubiquitous	ubiquitous
Progenitor_cells_1	Prx2540-1	CG12405	698	2516	311.554	87.7391	Set 1	1.81184	15.0165	NA	NA	NA	NA	NA	NA
Progenitor_cells_1	RpL3	CG4863	11418	59975	4748.36	2024.01	Set 1	1.2295	15.0165	maternal	cellular blastoderm list_4-6:ubiquitous ubiquitous	list_7-8:no staining no staining	faint ubiquitous	ant midgut PR clypeo-labral PR faint ubiquitous foregut PR head mesoderm PR hindgut proper PR post midgut PR rectum SA small intestine SA trunk mesoderm PR	atrium cat_term:global_finito dors prothoracic pharyngeal muscle epipharynx esophagus faint ubiquitous foregut hindgut hypopharynx large intestine midgut muscle sys post spiracle proventriculus inner layer rectum small intestine
Progenitor_cells_1	eEF1gamma	CG11901	5959	29711	2495.96	1012.3	Set 1	1.30053	14.6777	cat_term:global_finito maternal	ubiquitous	ubiquitous	ubiquitous	ubiquitous	ubiquitous
Progenitor_cells_1	Fib	CG9888	2344	10367	982.17	359.824	Set 1	1.44468	14.362	flag_for_volker maternal	ubiquitous	ubiquitous	trunk mesoderm PR ubiquitous	ant midgut PR dors pharyngeal muscle PR post midgut PR tracheal PR ubiquitous visceral muscle PR	dors prothoracic pharyngeal muscle faint ubiquitous gonad midgut tracheal sys visceral muscle
Progenitor_cells_1	Ubi-p63E	CG11624	2547	11720	1106.72	404.859	Set 1	1.44724	14.6365	no staining	no staining	no staining	no staining	no staining	no staining
Progenitor_cells_1	CG4364	CG4364	1504	6780	671.512	233.375	Set 1	1.51859	14.2648	maternal	cellular blastoderm list_4-6:ubiquitous maternal	ant endoderm A list_7-8:ubiquitous post endoderm PR ubiquitous	ant endoderm PR post endoderm PR ubiquitous	ant midgut PR head mesoderm PR post midgut PR salivary gland PR trunk mesoderm PR ubiquitous	cat_term:any_neural cat_term:global_finito cat_term:pan_CNS somatic muscle ubiquitous
Progenitor_cells_1	CCT1	CG5374	817	3602	377.523	125.389	Set 1	1.5787	13.5203	cat_term:finito1-3 cat_term:global_finito flag_for_volker maternal ubiquitous	cellular blastoderm faint ubiquitous list_4-6:specific list_4-6:ubiquitous ubiquitous yolk nuclei	ant endoderm A faint ubiquitous hindgut A list_7-8:specific list_7-8:ubiquitous post endoderm PR ubiquitous yolk nuclei	amnioserosa amnioserosa PR ant endoderm PR faint ubiquitous inclusive hindgut PR post endoderm PR ubiquitous yolk nuclei	amnioserosa ant midgut PR dors pharyngeal muscle PR faint ubiquitous head mesoderm PR hindgut proper PR post midgut PR salivary duct PR salivary gland body PR salivary gland PR somatic muscle PR trunk mesoderm PR ubiquitous visceral muscle PR	amnioserosa anal pad cat_term:any_neural cat_term:global_finito cat_term:pan_CNS cat_term:true_ubiquitous dors prothoracic pharyngeal muscle dors vessel midgut muscle sys somatic muscle ubiquitous visceral muscle
Progenitor_cells_1	alphaTub84B	CG1913	8168	44226	3532.3	1538.66	Set 1	1.198	14.1205	NA	NA	NA	NA	NA	NA
Progenitor_cells_1	Hsp23	CG4463	531	1498	197.579	55.6006	Set 1	1.80354	13.7674	maternal	no staining ubiquitous	no staining	no staining	brain PR midline PR vent nerve cord PR	brain vent midline vent nerve cord
Progenitor_cells_1	Hsc70-5	CG8542	1207	5369	539.062	185.685	Set 1	1.52984	13.8864	cat_term:global_finito maternal no staining	list_4-6:no staining no staining	list_7-8:ubiquitous no staining	no staining	ant midgut PR dors pharyngeal muscle PR no staining post midgut PR somatic muscle PR trunk mesoderm PR visceral muscle PR	cat_term:endo_meso cat_term:global_finito dors prothoracic pharyngeal muscle hindgut midgut muscle sys no staining somatic muscle visceral muscle
Progenitor_cells_1	Act42A	CG12051	3840	18558	1588.21	644.09	Set 1	1.29983	13.8225	NA	NA	NA	NA	NA	NA
Progenitor_cells_2	CG5171	CG5171	450	1471	343.18	53.375	Set 1	2.65795	22.3986	cat_term:global_finito	list_4-6:specific yolk nuclei	yolk nuclei	amnioserosa yolk nuclei	yolk nuclei	adult midgut precursor amnioserosa midgut yolk nuclei
Progenitor_cells_2	eEF1alpha1	CG8280	22353	223095	19214.5	7716.21	Set 1	1.31604	18.7273	ubiquitous	ubiquitous	ubiquitous	ubiquitous	ubiquitous	ubiquitous
Progenitor_cells_2	c12.1	CG12135	206	1111	185.789	38.707	Set 1	2.2262	16.7973	cat_term:finito1-3 cat_term:global_finito maternal	cat_term:finito4-6 list_4-6:ubiquitous ubiquitous	ant endoderm A cat_term:finito7-8 head mesoderm PR list_7-8:ubiquitous post endoderm PR trunk mesoderm PR ubiquitous	ant endoderm PR cat_term:finito9-10 head mesoderm PR post endoderm PR trunk mesoderm PR ubiquitous	ant midgut PR cat_term:finito11-12 faint ubiquitous head mesoderm PR post midgut PR trunk mesoderm PR ubiquitous	cat_term:finito13-16 dors prothoracic pharyngeal muscle faint ubiquitous midgut muscle sys ubiquitous
Progenitor_cells_2	RpS6	CG10944	5382	50633	4449.6	1743.46	Set 1	1.35089	16.3725	cat_term:global_finito maternal	maternal	ubiquitous	ubiquitous	ubiquitous	ubiquitous
Progenitor_cells_2	RpS3A	CG2168	3835	36908	3260.86	1246.43	Set 1	1.38629	16.18	cat_term:global_finito ubiquitous	ubiquitous	NA	NA	ubiquitous	ubiquitous
Progenitor_cells_2	Act42A	CG12051	2331	18749	1798.33	649.681	Set 1	1.46663	15.859	NA	NA	NA	NA	NA	NA
Progenitor_cells_2	betaTub60D	CG3401	2051	14824	1508.02	536.52	Set 1	1.48827	15.7152	cat_term:finito1-3 cat_term:global_finito	cat_term:finito4-6 list_4-6:no staining no staining	cat_term:finito7-8 no staining	cat_term:finito9-10 head mesoderm PR trunk mesoderm PR	cat_term:finito11-12 dors pharyngeal muscle PR head mesoderm PR muscle sys PR plasmatocytes A somatic muscle PR trunk mesoderm PR visceral muscle PR	adult muscle precursor PR cat_term:finito13-16 dors prothoracic pharyngeal muscle dors vessel muscle sys plasmatocytes somatic muscle visceral muscle
Progenitor_cells_2	RpL7	CG4897	3020	28318	2494.1	965.449	Set 1	1.36776	15.435	maternal	ubiquitous	ubiquitous	ubiquitous	ubiquitous	ubiquitous
Progenitor_cells_2	RpL6	CG11522	6363	64521	5176.15	2163.33	Set 1	1.25796	15.5206	cat_term:global_finito ubiquitous	ubiquitous	ubiquitous	ubiquitous	ubiquitous	ubiquitous
Progenitor_cells_2	Hsp23	CG4463	214	1518	236.648	54.7371	Set 1	2.08603	16.4644	maternal	no staining ubiquitous	no staining	no staining	brain PR midline PR vent nerve cord PR	brain vent midline vent nerve cord
Progenitor_cells_2	Prx2540-1	CG12405	481	2526	310.248	89.5185	Set 1	1.77714	14.7181	NA	NA	NA	NA	NA	NA
Progenitor_cells_2	ATPsynbeta	CG11154	1390	12791	1135.04	435.474	Set 1	1.37878	13.9944	maternal ubiquitous	ubiquitous	ubiquitous	ubiquitous	ubiquitous	ubiquitous
Progenitor_cells_2	eIF4E1	CG4035	771	6917	713.064	257.095	Set 1	1.46613	13.8988	cat_term:global_finito maternal	cellular blastoderm list_4-6:specific pole cell ubiquitous	list_7-8:specific ubiquitous	faint ubiquitous ubiquitous	ant midgut PR dors epidermis PR hindgut proper PR post midgut PR ubiquitous vent epidermis PR	dors epidermis foregut hindgut midgut ubiquitous vent epidermis
Progenitor_cells_2	RpL19	CG2746	3418	33527	2612.04	1105.99	Set 1	1.23853	14.0592	cat_term:global_finito maternal	ubiquitous	ubiquitous	ubiquitous	ubiquitous	ubiquitous
Progenitor_cells_2	lwr	CG3018	571	5522	532.452	189.384	Set 1	1.48374	13.4415	maternal	maternal	ubiquitous	ubiquitous	ubiquitous	ubiquitous
Progenitor_cells_2	RpL23A	CG7977	5962	64992	4854.61	2204.03	Set 1	1.13856	13.9422	cat_term:global_finito ubiquitous	ubiquitous	ubiquitous	ubiquitous	ubiquitous	ubiquitous
Progenitor_cells_2	PPO2	CG8193	353	2560	305.055	95.3623	Set 1	1.66253	13.7286	cat_term:global_finito	list_4-6:no staining no staining	list_7-8:no staining no staining	no staining	procrystal cell	crystal cell
Progenitor_cells_2	P32	CG6459	298	2230	242.417	78.8679	Set 1	1.6018	12.6979	cat_term:global_finito maternal	list_4-6:no staining no staining rapidly degraded	list_7-8:ubiquitous no staining	cat_term:finito9-10 no staining	ant midgut PR fat body/gonad PR foregut PR head mesoderm PR hindgut proper PR post midgut PR trunk mesoderm PR	anal pad cat_term:endo_meso dors prothoracic pharyngeal muscle fat body gastric caecum hindgut large intestine main segment of Malpighian tubule Malpighian tubule midgut midgut chamber muscle sys
Progenitor_cells_2	Hsc70-4	CG4264	4911	55682	4163.75	1917.42	Set 1	1.11797	13.4425	cat_term:global_finito maternal ubiquitous	maternal ubiquitous	ubiquitous	ubiquitous	ubiquitous	ubiquitous
Progenitor_cells_2	Hsp67Bc	CG4190	100	722	101.667	25.8677	Set 1	1.9199	12.8285	maternal	faint ubiquitous no staining	no staining	no staining	no staining yolk nuclei	brain dors/lateral sensory complexes sensory sys head vent nerve cord vent sensory complex PR yolk nuclei
Progenitor_cells_3	mt:CoI	CG34067	4641	21732	3427.39	813.03	Set 1	2.07396	24.3551	NA	NA	NA	NA	NA	NA
Progenitor_cells_3	RpL19	CG2746	5985	33414	3864.14	1095.45	Set 1	1.8173	21.6556	cat_term:global_finito maternal	ubiquitous	ubiquitous	ubiquitous	ubiquitous	ubiquitous
Progenitor_cells_3	RpL5	CG17489	5509	31436	3745.07	1102.52	Set 1	1.76288	20.9274	cat_term:global_finito ubiquitous	ubiquitous	ubiquitous	ubiquitous	ubiquitous	ubiquitous
Progenitor_cells_3	RpL13	CG4651	4520	25152	3070.53	892.027	Set 1	1.78171	20.6407	maternal	ubiquitous	ubiquitous	ubiquitous	ubiquitous	ubiquitous
Progenitor_cells_3	RpL10	CG17521	3902	21277	2626.49	758.167	Set 1	1.79065	20.3408	cat_term:global_finito maternal	maternal	list_7-8:ubiquitous ubiquitous	list_9-10:ubiquitous ubiquitous	ubiquitous	ubiquitous
Progenitor_cells_3	mt:ND4	CG34085	1059	5118	821.216	201.077	Set 1	2.02286	19.5881	NA	NA	NA	NA	NA	NA
Progenitor_cells_3	eEF5	CG3186	2118	10468	1434.32	373.183	Set 1	1.93855	20.3299	cat_term:global_finito maternal	ubiquitous	ubiquitous	ubiquitous	ubiquitous	ubiquitous
Progenitor_cells_3	RpS24	CG3751	3265	17790	2218.31	626.611	Set 1	1.82152	20.2478	NA	list_4-6:no staining	NA	NA	NA	dors prothoracic pharyngeal muscle muscle sys somatic muscle
Progenitor_cells_3	RpS3A	CG2168	5756	37186	3857.47	1242.94	Set 1	1.63273	19.4521	cat_term:global_finito ubiquitous	ubiquitous	NA	NA	ubiquitous	ubiquitous
Progenitor_cells_3	yl	CG1372	104	177	76.9891	6.90906	Set 1	3.28308	20.6348	cat_term:global_finito maternal no staining	maternal no staining	no staining	no staining	no staining	no staining
Progenitor_cells_3	CG5171	CG5171	427	1440	278.619	51.3897	Set 1	2.41094	19.5945	cat_term:global_finito	list_4-6:specific yolk nuclei	yolk nuclei	amnioserosa yolk nuclei	yolk nuclei	adult midgut precursor amnioserosa midgut yolk nuclei
Progenitor_cells_3	RpS20	CG15693	1783	8630	1176.79	311.135	Set 1	1.91462	19.5327	cat_term:global_finito ubiquitous	mesoderm AISN pole cell trunk mesoderm A trunk mesoderm AISN ubiquitous	pole cell trunk mesoderm PR ubiquitous	germ cell trunk mesoderm PR ubiquitous	germ cell ubiquitous	germ cell ubiquitous
Progenitor_cells_3	bic	CG3644	1455	7107	977.659	260.928	Set 1	1.90016	18.8774	maternal	cellular blastoderm list_4-6:ubiquitous maternal ubiquitous	ubiquitous	ubiquitous	head mesoderm PR trunk mesoderm PR ubiquitous	cat_term:global_finito cat_term:pan_CNS cat_term:true_ubiquitous dors prothoracic pharyngeal muscle midgut muscle sys ubiquitous
Progenitor_cells_3	roh	CG30415	426	1308	264.188	49.6874	Set 1	2.38187	19.1761	NA	NA	NA	NA	NA	NA
Progenitor_cells_3	RpL34b	CG9354	2584	14862	1686.61	496.885	Set 1	1.76024	18.8711	cat_term:global_finito maternal	maternal	ubiquitous	ubiquitous	ubiquitous	ubiquitous
Progenitor_cells_3	RpL18A	CG6510	4139	25621	2712.77	860.841	Set 1	1.65427	18.8687	cat_term:global_finito ubiquitous	ubiquitous	ubiquitous	ubiquitous	ubiquitous	ubiquitous
Progenitor_cells_3	RpL7	CG4897	4404	28652	2962.08	959.291	Set 1	1.62507	18.7417	maternal	ubiquitous	ubiquitous	ubiquitous	ubiquitous	ubiquitous
Progenitor_cells_3	RpS6	CG10944	7222	50675	4970.52	1720.45	Set 1	1.52977	18.7847	cat_term:global_finito maternal	maternal	ubiquitous	ubiquitous	ubiquitous	ubiquitous
Progenitor_cells_3	RpS26	CG10305	4375	27161	2808.66	913.83	Set 1	1.61831	18.5396	NA	NA	NA	NA	NA	NA
Progenitor_cells_3	RpS19a	CG4464	2188	11922	1529.74	452.983	Set 1	1.75257	18.5422	does_not_fit_array no staining	no staining	no staining	no staining	no staining	no staining
Ventral_midline	wrapper	CG10382	2138	765	2523.99	29.4415	Set 1	6.37353	72.034	cat_term:global_finito	list_4-6:no staining no staining	no staining	no staining	brain PR midline PR	brain central brain glia central brain neuron dors/lateral sensory complexes lateral cord glia lateral cord neuron lymph gland sensory nervous sys PR vent midline vent midline glia vent nerve cord vent sensory complex PR
Ventral_midline	sim	CG7771	1560	582	1810.59	23.4046	Set 1	6.21316	67.2452	cat_term:global_finito	ant endoderm AISN endoderm AISN list_4-6:specific mesectoderm AISN post endoderm AISN subset	ant endoderm A list_7-8:specific mesectoderm PR post endoderm PR	mesectoderm PR	foregut PR midline PR vent midline glia	cat_term:any_neural cat_term:subset_CNS vent midline vent midline glia
Ventral_midline	Oatp26F	CG31634	1580	695	1830.16	28.6185	Set 1	5.94932	64.482	cat_term:global_finito	list_4-6:no staining no staining	list_7-8:specific mesectoderm PR	mesectoderm PR	midline PR	brain central nervous sys vent midline vent nerve cord
Ventral_midline	Ect3	CG3132	1570	1339	1928.48	54.4272	Set 1	5.12073	55.8876	cat_term:global_finito flag_for_volker	AISN dors ectoderm AISN list_4-6:specific mesectoderm AISN procephalic ectoderm AISN subset visual AISN	dors ectoderm PR list_7-8:specific mesectoderm PR procephalic ectoderm A vent ectoderm PR visual A	mesectoderm PR procephalic ectoderm PR visual PR	brain PR midline PR optic lobe PR vent midline glia	adult hindgut precursor cat_term:any_neural cat_term:subset_CNS circulatory sys dors vessel gonad head epidermis oenocyte optic lobe post spiracle ring gland tracheal sys vent midline yolk nuclei
Ventral_midline	NetB	CG10521	11565	19654	13424.8	859.007	Set 1	3.9644	54.3627	cat_term:global_finito	cellular blastoderm list_4-6:specific mesoderm AISN subset	head mesoderm PR list_7-8:specific mesectoderm PR trunk mesoderm PR vent ectoderm PR	segmentally repeated trunk mesoderm PR	brain PR cat_term:finito11-12 central brain glia central brain neuron ganglion mother cell lateral cord glia lateral cord neuron neuroblasts of vent nervous sys somatic muscle PR vent nerve cord PR visceral muscle PR	brain cat_term:any_neural cat_term:subset_CNS central brain glia central brain neuron central nervous sys circular visceral muscle fibers head epidermis head epidermis dors lateral cord glia lateral cord neuron lateral cord surface glia vent midline vent nerve cord visceral muscle
Ventral_midline	CG31145	CG31145	6790	13230	7546.76	617.365	Set 1	3.60933	46.4947	cat_term:global_finito maternal	list_4-6:ubiquitous no staining	list_7-8:no staining no staining	no staining	ant midgut PR midline PR post midgut PR salivary gland body PR	apoptotic amnioserosa atrium dors epidermis dors vessel germ cell hindgut hypopharynx midgut post spiracle salivary gland salivary gland duct tracheal sys vent midline vent midline glia visceral branch
Ventral_midline	CG45263	CG45263	8663	20543	9871.11	931.185	Set 1	3.40452	45.1751	cat_term:global_finito no staining	no staining	amnioserosa A dors ectoderm PR list_7-8:specific no staining	amnioserosa PR dors ectoderm PR no staining	amnioserosa cat_term:finito11-12 no staining	amnioserosa antennal sense organ cat_term:finito13-16 cat_term:global_finito dors epidermis dors vessel dors/lateral sensory complexes no staining sensory nervous sys PR sensory sys head vent midline
Ventral_midline	NetA	CG18657	3198	7255	3691.98	322.017	Set 1	3.51471	41.6514	cat_term:global_finito no staining	list_4-6:specific mesectoderm AISN mesoderm AISN no staining subset	head mesoderm PR list_7-8:specific mesectoderm PR no staining trunk mesoderm PR vent nerve cord A	head mesoderm PR mesectoderm PR no staining procephalic ectoderm PR trunk mesoderm PR vent nerve cord PR P3	brain PR cat_term:finito11-12 central brain neuron head visceral muscle PR midline PR no staining vent midline glia vent midline neuroblast visceral muscle PR	brain cat_term:any_neural central brain neuron circular visceral muscle fibers dors epidermis head epidermis lateral cord neuron muscle sys no staining proventriculus vent epidermis vent midline vent nerve cord visceral muscle
Ventral_midline	shep	CG32423	10396	34637	11664.5	1491.74	Set 1	2.9661	40.0719	cat_term:global_finito flag_for_volker maternal	AISN ant endoderm AISN dors ectoderm AISN head mesoderm AISN list_4-6:specific subset	ant endoderm A head mesoderm PR list_7-8:specific	ant endoderm PR crystal cell SA head mesoderm PR	brain PR garland cell PR midline PR procrystal cell vent midline glia vent midline neuroblast vent nerve cord PR	brain central nervous sys crystal cell garland cell oenocyte sensory nervous sys PR vent midline vent nerve cord
Ventral_midline	dpr13	CG33996	607	1071	708.897	46.8064	Set 1	3.8903	36.8468	flag_for_volker no staining	no staining	no staining	no staining	no staining	brain dors/lateral sensory complexes vent midline vent nerve cord vent sensory complex PR
Ventral_midline	oc	CG12154	1727	4633	2007.97	183.132	Set 1	3.44692	37.8204	cat_term:global_finito no staining	ant gap no staining procephalic ectoderm AISN ubiquitous	no staining procephalic ectoderm A ubiquitous	hypopharynx PR mesectoderm PR no staining procephalic ectoderm PR ubiquitous	brain PR head epidermis dors PR P1 hypopharynx PR P1 midline PR no staining ubiquitous	brain head epidermis dors hypopharynx no staining vent midline vent nerve cord
Ventral_midline	vir-1	CG31764	815	1850	965.283	77.0401	Set 1	3.62866	35.9829	cat_term:global_finito maternal	list_4-6:no staining no staining	list_7-8:no staining no staining	cat_term:finito9-10 no staining	midline PR post spiracle SA	brain central brain central brain glia central nervous sys lateral cord glia oenocyte post spiracle tracheal sys vent midline vent midline glia vent midline neuron vent nerve cord
Ventral_midline	Pvf3	CG34378	3644	11954	4087.84	521.105	Set 1	2.96893	35.6196	cat_term:global_finito flag_for_volker maternal	list_4-6:specific procephalic ectoderm AISN subset vent ectoderm AISN visual AISN	hindgut A list_7-8:specific procephalic ectoderm A vent ectoderm PR visual A	gnathal lobes A inclusive hindgut PR mesectoderm PR vent ectoderm PR visual PR	clypeo-labral PR gnathal PR hindgut proper PR Malpighian tubule PR midline PR optic lobe PR vent epidermis PR vent midline glia	clypeolabrum hindgut Malpighian tubule optic lobe vent midline
Visceral_mesoderm_PR	sns	CG33141	2052	5644	4173.09	245.575	Set 1	4.08102	49.0834	NA	NA	NA	NA	NA	NA
Visceral_mesoderm_PR	tey	CG8780	999	1758	1851.53	76.0135	Set 1	4.58746	49.7982	cat_term:global_finito	no staining	list_7-8:no staining no staining	cat_term:finito9-10 no staining	cat_term:finito11-12 longitudinal visceral mesoderm PR visceral muscle PR	brain cat_term:finito13-16 central brain glia central nervous sys circular visceral muscle fibers lateral cord glia longitudinal visceral muscle fibers vent nerve cord
Visceral_mesoderm_PR	HLH54F	CG5005	262	321	494.875	12.5791	Set 1	5.1876	46.4489	faint ubiquitous list_1-3 maternal	ant list_4-6 list_4-6:specific mesoderm AISN post segmentally repeated trunk mesoderm A trunk mesoderm AISN	list_7-8 list_7-8:specific post trunk mesoderm PR	list_9-10 list_9-10:specific trunk mesoderm PR	dors pharyngeal muscle PR list_11-12 longitudinal visceral mesoderm PR segmentally repeated trunk mesoderm PR	dors prothoracic pharyngeal muscle list_13-16 longitudinal visceral muscle fibers ring gland
Visceral_mesoderm_PR	CG34377	CG34377	185	384	366.031	16.2658	Set 1	4.40598	37.5378	NA	NA	NA	NA	NA	NA
Visceral_mesoderm_PR	Kah	CG17181	579	2173	1199.98	95.5558	Set 1	3.6355	37.1911	cat_term:global_finito maternal no staining	no staining ubiquitous	no staining ubiquitous	ant endoderm PR head mesoderm PR no staining post endoderm PR trunk mesoderm PR ubiquitous	dors pharyngeal muscle PR faint ubiquitous head visceral muscle PR muscle sys PR somatic muscle PR visceral muscle PR	faint ubiquitous midgut muscle sys
Visceral_mesoderm_PR	NK7.1	CG8524	1684	8175	3417.95	380.433	Set 1	3.16363	37.1389	cat_term:global_finito maternal	list_4-6:no staining no staining post endoderm AISN	list_7-8:no staining no staining post endoderm PR	no staining	ant midgut PR head mesoderm PR no staining post midgut PR post spiracle SA trunk mesoderm PR	cat_term:global_finito labral sensory complex midgut chamber post spiracle procephalic vascular rudiment proventriculus somatic muscle
Visceral_mesoderm_PR	beat-IIb	CG4135	689	2251	1283.81	103.525	Set 1	3.61851	37.3696	NA	NA	NA	NA	NA	NA
Visceral_mesoderm_PR	gol	CG2679	608	2646	1215.72	113.13	Set 1	3.41307	34.9798	cat_term:global_finito	list_4-6:no staining no staining	list_7-8:no staining no staining	cat_term:finito9-10 no staining	cat_term:finito11-12 dors pharyngeal muscle PR longitudinal visceral mesoderm PR muscle sys PR somatic muscle PR visceral muscle PR	dors prothoracic pharyngeal muscle muscle sys
Visceral_mesoderm_PR	beat-IIa	CG14334	455	1696	862.892	77.2014	Set 1	3.46391	33.7895	cat_term:global_finito	list_4-6:no staining no staining	no staining	no staining	longitudinal visceral mesoderm PR stomatogastric nervous sys PR visceral muscle PR	brain leading edge cell longitudinal visceral muscle fibers sensory nervous sys PR stomatogastric nervous sys
Visceral_mesoderm_PR	Vrp1	CG13503	862	5070	1744.07	208.492	Set 1	3.05749	32.9263	cat_term:global_finito maternal	cellular blastoderm list_4-6:ubiquitous maternal	list_7-8:no staining no staining	trunk mesoderm PR	dors pharyngeal muscle PR muscle sys PR somatic muscle PR trunk mesoderm PR visceral muscle PR	cat_term:endo_meso dors prothoracic pharyngeal muscle hindgut midgut muscle sys somatic muscle
Visceral_mesoderm_PR	MCU	CG18769	421	2008	882.066	88.368	Set 1	3.30306	32.325	cat_term:global_finito maternal	maternal no staining	no staining	no staining	no staining	no staining
Visceral_mesoderm_PR	Mef2	CG1429	1738	13043	3431.76	519.981	Set 1	2.71965	31.9427	cat_term:global_finito maternal	cellular blastoderm faint ubiquitous list_4-6:ubiquitous ubiquitous	ant endoderm A head mesoderm PR list_7-8:specific trunk mesoderm PR	head mesoderm PR trunk mesoderm PR	cardiac mesoderm PR cat_term:finito11-12 dors pharyngeal muscle PR dors vessel SA longitudinal visceral mesoderm PR muscle sys PR somatic muscle PR trunk mesoderm PR visceral muscle PR	circular visceral muscle fibers dors prothoracic pharyngeal muscle dors vessel longitudinal visceral muscle fibers muscle sys somatic muscle visceral muscle
Visceral_mesoderm_PR	Adgf-A2	CG32178	296	1164	581.174	52.7291	Set 1	3.4352	31.5533	NA	NA	NA	NA	NA	NA
Visceral_mesoderm_PR	HEATR2	CG31320	185	688	371.701	30.1212	Set 1	3.57817	30.5643	cat_term:global_finito maternal	cellular blastoderm list_4-6:specific list_4-6:ubiquitous maternal subset	list_7-8:no staining no staining	no staining	cat_term:finito11-12 no staining	cat_term:finito13-16 dors/lateral sensory complexes sensory nervous sys PR sensory sys head vent sensory complex PR
Visceral_mesoderm_PR	lmd	CG4677	572	3397	1168.51	151.671	Set 1	2.93617	29.9245	cat_term:global_finito	list_4-6:no staining no staining	list_7-8:no staining no staining trunk mesoderm PR	head mesoderm PR no staining trunk mesoderm PR	dors pharyngeal muscle PR longitudinal visceral mesoderm PR muscle sys PR somatic muscle PR visceral muscle PR	dors prothoracic pharyngeal muscle muscle sys somatic muscle
Visceral_mesoderm_PR	tok	CG6863	373	1750	727.081	75.2573	Set 1	3.25317	30.931	cat_term:global_finito	amnioserosa AISN cellular blastoderm dors ectoderm AISN list_4-6:specific subset	amnioserosa A dors ectoderm PR list_7-8:specific	amnioserosa	no staining	corpus allatum
Visceral_mesoderm_PR	CG9674	CG9674	816	5539	1602.63	232.824	Set 1	2.77694	29.5665	maternal	maternal	no staining	no staining	NA	Malpighian tubule midgut
Visceral_mesoderm_PR	net	CG11450	137	499	279.393	20.2733	Set 1	3.71518	30.2093	no staining	amnioserosa AISN cellular blastoderm dors ectoderm A dors ectoderm AISN head epidermis dors AISN head mesoderm A list_4-6:specific trunk mesoderm A trunk mesoderm AISN	amnioserosa A dors ectoderm PR head epidermis dors A head mesoderm PR list_7-8:specific trunk mesoderm PR	amnioserosa PR dors ectoderm PR head epidermis dors PR head mesoderm PR trunk mesoderm PR vent ectoderm PR	cat_term:finito11-12 head mesoderm PR longitudinal visceral mesoderm PR salivary gland body PR trunk mesoderm PR	cat_term:finito13-16 cat_term:global_finito salivary gland body
Visceral_mesoderm_PR	ewg	CG3114	1277	10996	2591.74	481.433	Set 1	2.42552	27.506	maternal no staining	no staining ubiquitous	no staining	no staining	dors pharyngeal muscle PR head mesoderm PR no staining somatic muscle PR visceral muscle PR	brain no staining somatic muscle vent nerve cord visceral muscle
Visceral_mesoderm_PR	rst	CG4125	1722	16373	3473.12	722.729	Set 1	2.26271	26.615	cat_term:global_finito	amnioserosa AISN dors ectoderm AISN list_4-6:specific procephalic ectoderm AISN subset vent ectoderm AISN	amnioserosa A dors ectoderm PR list_7-8:specific mesectoderm PR procephalic ectoderm A vent ectoderm PR vent nerve cord A	amnioserosa amnioserosa PR mesectoderm PR vent ectoderm PR vent nerve cord PR P3	amnioserosa dors pharyngeal muscle PR foregut PR midline PR muscle sys PR somatic muscle PR trunk mesoderm PR vent midline neuroblast	anal pad dors prothoracic pharyngeal muscle hindgut muscle sys
Visceral_muscle	CG44422	CG44422	2613	3038	3379.95	134.036	Set 1	4.64559	54.4612	NA	NA	NA	NA	NA	NA
Visceral_muscle	disco-r	CG32577	3639	6925	4626.46	300.03	Set 1	3.94193	47.997	maternal	maternal no staining	no staining	clypeolabrum PR	atrium PR clypeo-labral PR segmentally repeated vent epidermis PR	atrium circular visceral muscle fibers clypeolabrum
Visceral_muscle	CG33253	CG33253	424	422	539.103	17.2465	Set 1	4.88487	44.3404	NA	list_4-6:no staining no staining	no staining	no staining	visceral muscle PR	ant spiracle cat_term:global_finito head epidermis visceral muscle
Visceral_muscle	side-IV	CG14372	1722	4102	2204.31	184.454	Set 1	3.57119	39.6644	NA	NA	NA	NA	NA	NA
Visceral_muscle	sqa	CG42347	775	1572	958.663	63.958	Set 1	3.88345	38.4709	NA	list_4-6:no staining no staining	no staining	no staining	NA	cat_term:global_finito muscle sys somatic muscle
Visceral_muscle	CG31823	CG31823	114	52	142.429	2.30021	Set 1	5.43154	38.9126	no staining	no staining	no staining	no staining	cat_term:finito11-12	cat_term:finito13-16 midgut
Visceral_muscle	bru3	CG43744	9808	40350	12211.7	1782.54	Set 1	2.77545	37.6797	NA	NA	NA	NA	NA	NA
Visceral_muscle	CG31323	CG31323	336	475	418.256	19.2979	Set 1	4.36498	38.0264	cat_term:global_finito	list_4-6:no staining no staining	no staining	no staining	no staining	midgut midgut chamber
Visceral_muscle	CG4829	CG4829	1415	3680	1808.13	160.386	Set 1	3.48591	37.7213	cat_term:global_finito flag_for_volker no staining	head mesoderm AISN list_4-6:no staining mesoderm AISN no staining	head mesoderm PR	head mesoderm PR	cardiac mesoderm PR leading edge cell SA pericardial cell SA plasmatocytes A visceral muscle PR	central brain surface glia central nervous sys fat body foregut sensory structure lymph gland macrophage pericardial cell plasmatocytes vent epidermis vent midline vent midline glia vent sensory complex PR visceral muscle
Visceral_muscle	NetA	CG18657	2305	7236	2931.21	320.116	Set 1	3.19033	36.7455	cat_term:global_finito no staining	list_4-6:specific mesectoderm AISN mesoderm AISN no staining subset	head mesoderm PR list_7-8:specific mesectoderm PR no staining trunk mesoderm PR vent nerve cord A	head mesoderm PR mesectoderm PR no staining procephalic ectoderm PR trunk mesoderm PR vent nerve cord PR P3	brain PR cat_term:finito11-12 central brain neuron head visceral muscle PR midline PR no staining vent midline glia vent midline neuroblast visceral muscle PR	brain cat_term:any_neural central brain neuron circular visceral muscle fibers dors epidermis head epidermis lateral cord neuron muscle sys no staining proventriculus vent epidermis vent midline vent nerve cord visceral muscle
Visceral_muscle	wupA	CG7178	4558	20641	5659.39	809.907	Set 1	2.80304	34.9446	cat_term:global_finito flag_for_volker no staining	no staining	list_7-8:no staining no staining	no staining	no staining	dors prothoracic pharyngeal muscle muscle sys somatic muscle visceral muscle
Visceral_muscle	AstC-R2	CG13702	235	444	303.709	18.9889	Set 1	3.92542	32.3898	NA	NA	NA	NA	NA	NA
Visceral_muscle	Zasp52	CG30084	2101	8377	2660.58	348.708	Set 1	2.92752	33.3095	flag_for_volker maternal no staining	cellular blastoderm mesectoderm AISN no staining ubiquitous	ant endoderm A faint ubiquitous mesectoderm PR no staining post endoderm PR	ant endoderm PR faint ubiquitous mesectoderm PR no staining post endoderm PR	ant midgut PR dors vessel SA faint ubiquitous no staining post midgut PR somatic muscle PR	dors vessel epipharynx faint ubiquitous hypopharynx midgut no staining somatic muscle
Visceral_muscle	org-1	CG11202	476	1008	593.437	44.8011	Set 1	3.69564	34.0567	cat_term:global_finito no staining	list_4-6:no staining no staining	no staining	trunk mesoderm PR	visceral muscle PR	somatic muscle visceral muscle
Visceral_muscle	up	CG7107	5604	28818	6925.19	1201.48	Set 1	2.52584	32.2243	cat_term:global_finito maternal no staining	list_4-6:no staining no staining	list_7-8:no staining no staining	cat_term:finito9-10 no staining	no staining	cat_term:global_finito dors prothoracic pharyngeal muscle muscle sys somatic muscle visceral muscle
Visceral_muscle	Sdr	CG3837	162	262	210.91	10.5763	Set 1	4.18739	32.3572	NA	NA	NA	NA	NA	NA
Visceral_muscle	Con	CG7503	2552	10891	3277.06	476.539	Set 1	2.77871	32.4515	NA	NA	NA	NA	NA	NA
Visceral_muscle	zormin	CG33484	1472	5953	1827.89	240.173	Set 1	2.92204	31.6654	NA	NA	NA	NA	NA	NA
Visceral_muscle	Ca-alpha1T	CG15899	852	2812	1083.84	122.921	Set 1	3.12866	31.5472	NA	NA	NA	NA	NA	NA
Visceral_muscle	Mhc	CG17927	7307	49916	9040.56	1723.67	Set 1	2.39009	31.4114	NA	NA	NA	NA	NA	NA
Muscle_system_2	bt	CG32019	7132	45872	12124.5	1637.38	Set 1	2.88759	39.1724	NA	list_4-6:no staining no staining	no staining	no staining	no staining	cat_term:global_finito dors prothoracic pharyngeal muscle muscle sys somatic muscle
Muscle_system_2	up	CG7107	5384	28573	9486.96	1197.39	Set 1	2.98484	39.4354	cat_term:global_finito maternal no staining	list_4-6:no staining no staining	list_7-8:no staining no staining	cat_term:finito9-10 no staining	no staining	cat_term:global_finito dors prothoracic pharyngeal muscle muscle sys somatic muscle visceral muscle
Muscle_system_2	Sh	CG12348	2298	9879	3892.83	455.142	Set 1	3.09326	36.8933	no staining	no staining	no staining	no staining	no staining	no staining
Muscle_system_2	Mhc	CG17927	5852	49737	10089.2	1762.97	Set 1	2.51592	33.4634	NA	NA	NA	NA	NA	NA
Muscle_system_2	wupA	CG7178	3108	20691	5323.43	825.92	Set 1	2.68654	33.255	cat_term:global_finito flag_for_volker no staining	no staining	list_7-8:no staining no staining	no staining	no staining	dors prothoracic pharyngeal muscle muscle sys somatic muscle visceral muscle
Muscle_system_2	CG33521	CG33521	612	2652	1041.61	114.995	Set 1	3.16668	31.7491	NA	list_4-6:no staining no staining	no staining	no staining	no staining	cat_term:global_finito muscle sys somatic muscle
Muscle_system_2	Neto	CG44328	342	1229	601.168	57.9575	Set 1	3.35002	30.9342	cat_term:global_finito no staining	no staining	no staining	no staining	no staining	no staining
Muscle_system_2	Nlg1	CG31146	221	799	376.381	37.0481	Set 1	3.3063	28.3015	cat_term:global_finito no staining	no staining	no staining	no staining	no staining	no staining
Muscle_system_2	dpr10	CG32057	387	1749	654.234	80.3193	Set 1	3.00814	28.1437	cat_term:global_finito no staining	no staining	no staining	no staining	no staining	no staining
Muscle_system_2	CG1674	CG1674	405	2281	685.646	90.9843	Set 1	2.898	27.3091	maternal no staining	list_4-6:no staining maternal no staining	no staining	no staining	no staining ubiquitous	cat_term:global_finito central nervous sys dors prothoracic pharyngeal muscle muscle sys somatic muscle vent nerve cord
Muscle_system_2	Eip63F-1	CG15855	482	2603	856.583	117.889	Set 1	2.84897	27.7608	NA	NA	NA	NA	NA	NA
Muscle_system_2	mspo	CG10145	997	6578	1752.96	297.993	Set 1	2.55161	27.4971	cat_term:global_finito	AISN dors ectoderm AISN hindgut AISN list_4-6:specific	hindgut A list_7-8:specific	no staining	no staining	brain central nervous sys circulatory sys dors prothoracic pharyngeal muscle dors/lateral sensory complexes muscle sys pericardial cell sensory sys head vent nerve cord vent sensory complex PR
Muscle_system_2	CG34417	CG34417	1225	10155	2161.98	434.333	Set 1	2.31216	25.616	NA	list_4-6:no staining no staining	list_7-8:no staining no staining	cat_term:finito9-10 no staining	no staining	cat_term:global_finito dors prothoracic pharyngeal muscle muscle sys somatic muscle
Muscle_system_2	Fhos	CG42610	915	6393	1593.34	291.234	Set 1	2.44685	26.0314	cat_term:finito1-3 cat_term:global_finito maternal	cat_term:finito4-6 list_4-6:ubiquitous maternal	cat_term:finito7-8 list_7-8:no staining no staining	cat_term:finito9-10 no staining	cat_term:finito11-12 no staining	cat_term:finito13-16 salivary gland body vent midline
Muscle_system_2	jp	CG4405	267	1696	497.892	68.488	Set 1	2.841	25.4627	ubiquitous	list_4-6:ubiquitous no staining ubiquitous	list_7-8:no staining no staining ubiquitous	no staining ubiquitous	no staining ubiquitous	cat_term:global_finito muscle sys somatic muscle ubiquitous
Muscle_system_2	l(2)01289	CG9432	437	3322	708.03	121.209	Set 1	2.53446	24.0006	NA	NA	NA	NA	NA	NA
Muscle_system_2	Mrtf	CG32296	996	7593	1705.77	326.691	Set 1	2.38001	25.5543	cat_term:global_finito maternal	ubiquitous	ubiquitous	ubiquitous	ubiquitous	somatic muscle ubiquitous visceral muscle
Muscle_system_2	tn	CG15105	291	2395	506.839	87.3741	Set 1	2.51983	22.6488	NA	list_4-6:no staining no staining	list_7-8:no staining no staining	cat_term:finito9-10 no staining	no staining	cat_term:global_finito dors epidermis dors prothoracic pharyngeal muscle muscle sys somatic muscle vent epidermis
Muscle_system_2	CG12672	CG12672	69	242	121.356	11.874	Set 1	3.23671	22.4464	NA	NA	NA	NA	NA	NA
Muscle_system_2	sals	CG31374	342	2267	585.249	99.1056	Set 1	2.54753	23.4255	flag_for_volker maternal no staining	faint ubiquitous no staining	faint ubiquitous no staining	faint ubiquitous no staining	faint ubiquitous no staining trunk mesoderm PR	dors prothoracic pharyngeal muscle garland cell muscle sys somatic muscle
Anterior_midgut	Jon99Cii	CG31034	7795	347	7722.64	12.5731	Set 1	9.1522	118.201	maternal no staining	no staining	no staining	no staining	no staining	no staining
Anterior_midgut	Jon99Ciii	CG31362	5032	240	5146.84	8.24637	Set 1	9.12058	112.455	NA	NA	NA	NA	NA	NA
Anterior_midgut	CG18180	CG18180	4374	104	3639.96	3.35772	Set 1	9.70613	114.825	maternal	faint ubiquitous	no staining	no staining	no staining	no staining
Anterior_midgut	Jon65Aiv	CG6467	2138	105	2676.08	4.06549	Set 1	9.0452	102.993	no staining	no staining	no staining	no staining	no staining	cat_term:global_finito midgut midgut chamber
Anterior_midgut	CG7290	CG7290	1508	58	2344.12	2.03189	Set 1	9.59461	107.416	NA	NA	NA	NA	NA	NA
Anterior_midgut	CG9682	CG9682	732	25	1941.46	0.738346	Set 1	10.1252	110.605	cat_term:global_finito no staining	no staining	no staining	no staining	no staining	no staining
Anterior_midgut	Jon25Biii	CG8871	2605	117	3042.09	4.22357	Set 1	9.18581	106.292	cat_term:global_finito no staining	no staining	no staining	no staining	no staining	no staining
Anterior_midgut	Jon99Fii	CG2229	3371	124	3297.22	3.82085	Set 1	9.41775	110.07	cat_term:global_finito no staining	no staining	no staining	no staining	no staining	no staining
Anterior_midgut	CG10910	CG10910	953	33	1743.85	1.46685	Set 1	9.46539	101.932	cat_term:global_finito no staining	no staining	no staining	no staining	no staining	no staining
Anterior_midgut	Jon65Ai	CG10475	2077	69	1902.42	1.55106	Set 1	9.54252	103.96	cat_term:global_finito no staining	no staining	no staining	no staining	no staining	no staining
Anterior_midgut	Jon99Fi	CG18030	1996	102	2478.95	3.14081	Set 1	9.2256	104.029	NA	NA	NA	NA	NA	NA
Anterior_midgut	CG17633	CG17633	2480	36	1813.81	1.53512	Set 1	9.48275	102.656	NA	list_4-6:no staining no staining	no staining	cat_term:finito9-10 no staining	no staining	cat_term:global_finito midgut midgut chamber
Anterior_midgut	yip7	CG6457	1010	27	1185.01	0.938988	Set 1	9.25538	94.515	no staining	no staining	no staining	no staining	no staining	cat_term:global_finito midgut chamber no staining
Anterior_midgut	Jon65Aiii	CG6483	1339	69	1675.84	2.9983	Set 1	8.71128	93.3112	cat_term:global_finito maternal	list_4-6:no staining no staining	list_7-8:no staining no staining	cat_term:finito9-10	no staining	midgut midgut chamber
Anterior_midgut	CG7298	CG7298	1338	250	2770.3	8.58134	Set 1	8.1756	93.499	cat_term:global_finito	list_4-6:no staining no staining	list_7-8:no staining no staining	no staining	no staining	cat_term:global_finito proventriculus
Anterior_midgut	Jon25Bi	CG8867	806	59	1119.22	2.22891	Set 1	8.43723	85.4655	cat_term:global_finito no staining	no staining	no staining	no staining	no staining	no staining
Anterior_midgut	CG8560	CG8560	2995	199	2496.5	8.76884	Set 1	7.9975	90.262	cat_term:global_finito	list_4-6:no staining no staining	list_7-8:no staining no staining	cat_term:finito9-10 no staining	no staining	cuprophilic cell dors/lateral sensory complexes midgut proventriculus tracheal sys
Anterior_midgut	CG33128	CG33128	840	154	1988.61	6.69585	Set 1	8.01347	87.8137	NA	NA	NA	NA	NA	NA
Anterior_midgut	CG10911	CG10911	498	19	852.793	0.739855	Set 1	8.93708	87.027	cat_term:global_finito no staining	no staining	no staining	no staining	no staining	no staining
Anterior_midgut	Jon25Bii	CG8869	905	97	1026.48	3.45311	Set 1	7.84868	78.5252	cat_term:global_finito maternal no staining	maternal no staining	no staining	no staining	no staining	no staining
large_intestine_hindgut_analpad_2	CG12920	CG12920	1359	332	1728.07	14.0075	Set 1	6.84733	73.6484	cat_term:global_finito no staining	no staining	no staining	no staining	no staining	no staining
large_intestine_hindgut_analpad_2	TwdlX	CG32571	1553	417	1555.73	14.9904	Set 1	6.60425	70.0335	NA	NA	NA	NA	NA	NA
large_intestine_hindgut_analpad_2	Cyp49a1	CG18377	1973	876	2408.56	36.0333	Set 1	6.0232	67.668	cat_term:global_finito	list_4-6:no staining no staining	no staining	cat_term:finito9-10 no staining	cat_term:finito11-12 no staining post spiracle SA	anal pad atrium cat_term:finito13-16 epipharynx foregut hindgut main segment of Malpighian tubule post spiracle proventriculus
large_intestine_hindgut_analpad_2	CG6409	CG6409	1636	693	1784.34	25.3415	Set 1	6.08191	65.6967	cat_term:global_finito	list_4-6:no staining no staining	list_7-8:no staining no staining	no staining	no staining	anal pad large intestine vent epidermis
large_intestine_hindgut_analpad_2	CG42296	CG42296	1129	841	1382.8	36.0145	Set 1	5.22336	54.5027	NA	NA	NA	NA	NA	NA
large_intestine_hindgut_analpad_2	CG14949	CG14949	272	30	286.814	1.04765	Set 1	7.13	58.2449	NA	NA	NA	NA	NA	NA
large_intestine_hindgut_analpad_2	CG6125	CG6125	293	144	285.47	3.87389	Set 1	5.87212	47.9297	cat_term:global_finito	list_4-6:no staining no staining	list_7-8:no staining no staining	amnioserosa yolk nuclei	yolk nuclei	large intestine
large_intestine_hindgut_analpad_2	CG12017	CG12017	2201	3623	2689.85	166.982	Set 1	4.00114	45.5884	cat_term:global_finito	list_4-6:no staining no staining	list_7-8:no staining no staining	cat_term:finito9-10 no staining	no staining	dors epidermis head epidermis vent epidermis
large_intestine_hindgut_analpad_2	CG9702	CG9702	233	95	244.408	2.99974	Set 1	5.93324	47.1042	NA	NA	NA	NA	NA	NA
large_intestine_hindgut_analpad_2	CG7778	CG7778	177	60	178.327	2.40273	Set 1	5.71169	42.7602	cat_term:global_finito	list_4-6:no staining no staining	list_7-8:no staining no staining	no staining	no staining	anal pad atrium head epidermis hindgut large intestine vent epidermis
large_intestine_hindgut_analpad_2	NKCC	CG31547	309	196	327.415	7.96487	Set 1	5.19069	43.3909	cat_term:global_finito maternal	list_4-6:no staining maternal no staining	list_7-8:no staining no staining ubiquitous	no staining ubiquitous	no staining ubiquitous	anal pad midgut
large_intestine_hindgut_analpad_2	CG32564	CG32564	907	1543	935.397	45.2878	Set 1	4.33688	42.8092	cat_term:global_finito no staining	list_4-6:no staining no staining	list_7-8:no staining no staining	no staining	hindgut proper PR large intestine SA	anal pad large intestine
large_intestine_hindgut_analpad_2	CG4462	CG4462	143	49	140.942	1.98323	Set 1	5.56208	39.7642	no staining	no staining	no staining	no staining	no staining	anal pad hindgut
large_intestine_hindgut_analpad_2	CG44098	CG44098	329	181	298.529	7.62808	Set 1	5.11269	42.0598	cat_term:global_finito no staining	no staining	no staining	no staining	no staining vent nerve cord PR	brain no staining vent nerve cord
large_intestine_hindgut_analpad_2	CG7720	CG7720	1918	4404	2352.3	207.457	Set 1	3.49626	39.1597	NA	list_4-6:no staining no staining	list_7-8:no staining no staining	cat_term:finito9-10 no staining	large intestine SA	cat_term:global_finito dors epidermis large intestine vent epidermis
large_intestine_hindgut_analpad_2	CG9993	CG9993	212	92	189.651	3.75789	Set 1	5.31688	40.2742	NA	list_4-6:no staining no staining	no staining	no staining	anal pad SA hindgut proper PR	anal pad cat_term:global_finito
large_intestine_hindgut_analpad_2	CG15615	CG15615	648	1339	745.921	49.6366	Set 1	3.88077	37.0412	flag_for_volker no staining	no staining	no staining	no staining	no staining	anal pad dors epidermis hindgut vent epidermis
large_intestine_hindgut_analpad_2	Nha1	CG10806	221	181	242.014	7.23587	Set 1	4.87703	38.6499	maternal no staining	no staining	no staining	no staining	no staining	anal pad hindgut rectum
large_intestine_hindgut_analpad_2	Cyp4aa1	CG8302	195	174	235.067	7.11927	Set 1	4.85558	38.2768	NA	NA	NA	NA	NA	NA
large_intestine_hindgut_analpad_2	OtopLb	CG3332	123	120	153.899	4.61503	Set 1	4.77655	34.7503	cat_term:global_finito no staining	list_4-6:no staining no staining	list_7-8:no staining no staining	no staining	no staining	anal pad large intestine no staining rectum
large_intestine_hindgut_analpad_1	CG17781	CG17781	757	193	1537.63	7.99007	Set 1	7.41816	78.5393	flag_for_volker maternal	faint ubiquitous	no staining	faint ubiquitous head epidermis dors PR trunk mesoderm PR	amnioserosa ant midgut PR faint ubiquitous head epidermis dors PR P1 post midgut PR visceral muscle PR	amnioserosa anal pad faint ubiquitous head epidermis dors hindgut midgut visceral muscle
large_intestine_hindgut_analpad_1	CG33003	CG33003	1106	687	2193.63	30.0443	Set 1	6.14285	68.1842	NA	NA	NA	NA	NA	NA
large_intestine_hindgut_analpad_1	CG13082	CG13082	1954	1968	3930.63	86.8385	Set 1	5.48376	65.4811	NA	list_4-6:no staining no staining	list_7-8:no staining no staining	cat_term:finito9-10 no staining	hindgut proper PR post midgut PR salivary gland body PR	anal pad atrium esophagus foregut head epidermis hindgut large intestine midgut rectum tracheal sys vent epidermis
large_intestine_hindgut_analpad_1	CG17780	CG17780	471	320	937.131	14.4147	Set 1	5.92587	58.51	cat_term:global_finito	list_4-6:no staining no staining	list_7-8:no staining no staining	no staining	no staining	anal pad hindgut large intestine
large_intestine_hindgut_analpad_1	CG13616	CG13616	200	68	400.606	2.7166	Set 1	6.75205	58.4028	cat_term:global_finito	list_4-6:no staining no staining	list_7-8:no staining no staining	no staining	no staining	anal pad large intestine
large_intestine_hindgut_analpad_1	CG14720	CG14720	152	45	304.746	1.64412	Set 1	6.84868	56.544	NA	NA	NA	NA	NA	NA
large_intestine_hindgut_analpad_1	CG6785	CG6785	509	464	981.927	19.7507	Set 1	5.56438	55.3152	NA	NA	NA	NA	NA	NA
large_intestine_hindgut_analpad_1	ine	CG15444	709	1033	1390.07	43.502	Set 1	4.96514	51.846	cat_term:global_finito maternal	list_4-6:no staining no staining	list_7-8:no staining no staining	no staining	ant midgut PR faint ubiquitous hindgut proper PR post midgut PR	anal pad brain central nervous sys dors epidermis dors vessel hindgut large intestine lateral cord glia Malpighian tubule midgut vent epidermis vent nerve cord
large_intestine_hindgut_analpad_1	otp	CG10036	2144	4883	4253.65	226.192	Set 1	4.22672	50.9523	cat_term:global_finito maternal no staining	list_4-6:no staining no staining	hindgut A list_7-8:specific no staining	inclusive hindgut PR no staining	anal pad SA brain PR hindgut proper PR large intestine SA no staining vent nerve cord PR	anal pad brain hindgut large intestine no staining vent nerve cord vent sensory complex PR
large_intestine_hindgut_analpad_1	CG7720	CG7720	1859	4328	3611.24	197.532	Set 1	4.18505	49.4618	NA	list_4-6:no staining no staining	list_7-8:no staining no staining	cat_term:finito9-10 no staining	large intestine SA	cat_term:global_finito dors epidermis large intestine vent epidermis
large_intestine_hindgut_analpad_1	Ac78C	CG10564	318	512	626.588	22.2212	Set 1	4.75401	44.1822	cat_term:finito1-3 cat_term:global_finito no staining	AISN cat_term:finito4-6 gap list_4-6:specific subset ubiquitous	cat_term:finito7-8 dors ectoderm PR gap list_7-8:specific procephalic ectoderm A vent ectoderm PR	cat_term:finito9-10 no staining	cat_term:finito11-12 no staining	cat_term:finito13-16 hindgut large intestine
large_intestine_hindgut_analpad_1	CG13614	CG13614	69	26	148.123	1.09725	Set 1	6.14215	44.3485	NA	NA	NA	NA	NA	NA
large_intestine_hindgut_analpad_1	CG34443	CG34443	49	19	106.151	0.692186	Set 1	5.97109	40.266	NA	NA	NA	NA	NA	NA
large_intestine_hindgut_analpad_1	Sox21b	CG32139	582	1455	1167.93	60.4365	Set 1	4.24871	43.2985	cat_term:global_finito maternal no staining	faint ubiquitous list_4-6:ubiquitous no staining	faint ubiquitous head mesoderm PR list_7-8:no staining no staining trunk mesoderm PR	no staining trunk mesoderm PR vent ectoderm PR vent sensory complex SA	hindgut proper PR labral sensory complex PR large intestine SA vent epidermis PR	atrium hindgut hypopharynx labral sensory complex large intestine vent epidermis
large_intestine_hindgut_analpad_1	CG13313	CG13313	147	148	298.223	7.04897	Set 1	5.21144	42.8645	NA	list_4-6:no staining no staining	no staining	no staining	hindgut proper PR large intestine SA	anal pad cat_term:global_finito hindgut large intestine
large_intestine_hindgut_analpad_1	dysf	CG32474	394	878	780.36	38.872	Set 1	4.29069	41.2329	cat_term:global_finito maternal	no staining	no staining	no staining	anal pad SA atrium PR cardiac mesoderm PR clypeo-labral PR large intestine SA tracheal PR	anal pad atrium dors vessel epipharynx large intestine leading edge cell tracheal sys
large_intestine_hindgut_analpad_1	CG14826	CG14826	65	50	139.075	1.84126	Set 1	5.61319	40.0224	NA	NA	NA	NA	NA	NA
large_intestine_hindgut_analpad_1	CG4702	CG4702	2691	13552	5255.52	607.205	Set 1	3.1112	38.4541	cat_term:global_finito flag_for_volker	cellular blastoderm dors ectoderm AISN gap list_4-6:specific segmentally repeated subset vent ectoderm A	dors ectoderm PR gap list_7-8:specific segmentally repeated vent ectoderm PR	vent ectoderm PR	vent epidermis PR	anal pad atrium dors epidermis epipharynx esophagus foregut head epidermis hindgut hypopharynx large intestine main segment of Malpighian tubule Malpighian tubule tip cell post spiracle rectum salivary gland duct small intestine tracheal sys vent epidermis visceral branch
large_intestine_hindgut_analpad_1	CG34031	CG34031	63	59	126.184	2.54839	Set 1	5.15222	36.018	NA	NA	NA	NA	NA	NA
large_intestine_hindgut_analpad_1	RhoGEF64C	CG32239	1779	8770	3483.44	406.349	Set 1	3.09618	36.4318	cat_term:global_finito	list_4-6:no staining no staining	list_7-8:no staining no staining	cat_term:finito9-10 no staining	hindgut proper PR large intestine SA Malpighian tubule tip cell PR post spiracle SA small intestine SA	anal pad atrium dors epidermis epipharynx esophagus foregut head epidermis hindgut hypopharynx large intestine Malpighian tubule tip cell post spiracle vent epidermis
lateral_cord_glia	naz	CG31235	409	262	1861.1	11.0258	Set 1	7.27388	79.0141	cat_term:global_finito	list_4-6:no staining list_4-6:ubiquitous no staining	list_7-8:ubiquitous no staining	no staining	brain PR vent nerve cord PR	brain central brain central brain glia central brain neuron central nervous sys lateral cord lateral cord glia vent midline vent nerve cord
lateral_cord_glia	Gat	CG1732	411	526	1884.8	20.7381	Set 1	6.43804	70.0521	NA	list_4-6:no staining no staining	list_7-8:no staining no staining	no staining	no staining	brain cat_term:global_finito central brain glia central nervous sys lateral cord glia vent nerve cord
lateral_cord_glia	alrm	CG11910	280	735	1272.61	26.1456	Set 1	5.55093	57.2562	cat_term:global_finito	no staining	list_7-8:no staining no staining	no staining	no staining	central brain glia lateral cord glia vent nerve cord
lateral_cord_glia	zyd	CG2893	408	1201	1830.25	51.3985	Set 1	5.12637	55.5628	cat_term:global_finito maternal	no staining	no staining	no staining	no staining	brain central brain glia central brain surface glia central nervous sys lateral cord glia lateral cord neuron vent midline vent nerve cord
lateral_cord_glia	CG42741	CG42741	495	1610	2164.79	73.6284	Set 1	4.85836	53.834	flag_for_volker no staining	hindgut AISN	hindgut A procephalic ectoderm A	inclusive hindgut PR procephalic ectoderm PR	dors/lateral sensory complexes PR head epidermis PR P1 labial sensory complex PR labral sensory complex PR maxillary sensory complex PR vent sensory complex SA	no staining
lateral_cord_glia	CG1124	CG1124	164	291	757.37	13.2769	Set 1	5.72924	54.8103	cat_term:global_finito	list_4-6:no staining no staining	list_7-8:no staining no staining	no staining	no staining	brain central brain glia lateral cord glia vent midline vent midline glia vent nerve cord
lateral_cord_glia	CG31663	CG31663	203	475	887.098	19.4834	Set 1	5.43656	53.2488	cat_term:global_finito	list_4-6:no staining no staining	list_7-8:no staining no staining	no staining	no staining	brain central brain glia central brain neuron lateral cord glia lateral cord neuron Malpighian tubule vent nerve cord
lateral_cord_glia	CG4409	CG4409	69	86	338.918	3.56589	Set 1	6.2139	52.2529	flag_for_volker no staining	no staining	no staining	no staining	no staining	brain lateral cord glia vent nerve cord
lateral_cord_glia	axo	CG43225	295	863	1317.76	37.9439	Set 1	5.08055	52.6597	NA	NA	NA	NA	NA	NA
lateral_cord_glia	Cyp4g15	CG11715	61	71	278.579	2.42165	Set 1	6.34725	51.5848	cat_term:global_finito	list_4-6:no staining no staining	list_7-8:no staining no staining	no staining	no staining	brain central brain glia central nervous sys lateral cord glia vent nerve cord
lateral_cord_glia	CG5758	CG5758	97	246	398.079	10.5353	Set 1	5.10893	44.1439	NA	NA	NA	NA	NA	NA
lateral_cord_glia	CG6723	CG6723	28	34	133.587	1.2524	Set 1	5.89017	41.6576	cat_term:global_finito	list_4-6:no staining no staining	no staining	no staining	no staining	brain central brain glia central nervous sys lateral cord lateral cord glia vent nerve cord
lateral_cord_glia	NimA	CG42282	38	40	153.72	1.49331	Set 1	5.9461	43.249	NA	NA	NA	NA	NA	NA
lateral_cord_glia	Eaat1	CG3747	65	171	309.794	6.99747	Set 1	5.27562	43.6812	maternal no staining	maternal no staining	no staining	no staining	no staining	no staining
lateral_cord_glia	CG42613	CG42613	327	2194	1584.45	96.986	Set 1	4.01526	42.685	NA	NA	NA	NA	NA	NA
lateral_cord_glia	Octbeta2R	CG33976	272	1408	1144.48	64.2214	Set 1	4.1332	42.0005	cat_term:global_finito no staining	no staining	no staining	no staining	no staining	brain no staining vent nerve cord
lateral_cord_glia	Pde9	CG42276	1208	11018	5170.36	522.655	Set 1	3.30357	40.754	NA	NA	NA	NA	NA	NA
lateral_cord_glia	Ace	CG17907	192	1430	876.241	56.3234	Set 1	3.93413	38.4633	cat_term:global_finito	list_4-6:no staining no staining	list_7-8:no staining no staining	no staining	no staining	brain central brain neuron lateral cord neuron vent nerve cord
lateral_cord_glia	Nep4	CG4058	63	370	315.831	13.9339	Set 1	4.40249	36.574	cat_term:global_finito flag_for_volker maternal no staining	list_4-6:ubiquitous no staining ubiquitous	list_7-8:ubiquitous no staining ubiquitous	no staining ubiquitous	cardiac mesoderm PR tracheal PR	brain dors vessel lateral cord lateral cord glia lymph gland pericardial cell vent nerve cord
Germ_cells_testes	CG31954	CG31954	37	7	1572.47	0.0564517	Set 1	10.5396	111.928	NA	NA	NA	NA	NA	NA
Germ_cells_testes	CG34447	CG34447	35	3	1317.78	0.177798	Set 1	10.1278	104.975	NA	NA	NA	NA	NA	NA
Germ_cells_testes	CG5255	CG5255	27	11	1347.2	0.166083	Set 1	10.1741	105.778	NA	NA	NA	NA	NA	NA
Germ_cells_testes	CG4017	CG4017	17	9	836.923	0.281839	Set 1	9.35074	90.8019	cat_term:global_finito	list_4-6:no staining no staining	no staining	no staining	no staining	tracheal sys tracheole
Germ_cells_testes	CG9804	CG9804	7	186	454.153	6.9441	Set 1	5.83715	51.5433	maternal no staining ubiquitous	no staining rapidly degraded	no staining	central brain PR P3 no staining vent nerve cord PR P3	ant midgut PR brain PR no staining post midgut PR vent nerve cord PR	brain midgut no staining vent nerve cord
Germ_cells_testes	CG5265	CG5265	2	0	112.894	0	Set 1	6.81883	46.5832	cat_term:finito1-3 maternal	cat_term:finito4-6 faint ubiquitous gap list_4-6:specific subset	cat_term:finito7-8 faint ubiquitous	cat_term:finito9-10 faint ubiquitous procephalic ectoderm PR vent nerve cord PR P3	brain PR cat_term:global_finito faint ubiquitous	cat_term:global_finito no staining
Germ_cells_testes	CG8560	CG8560	10	603	578.5	15.5235	Set 1	5.12972	47.084	cat_term:global_finito	list_4-6:no staining no staining	list_7-8:no staining no staining	cat_term:finito9-10 no staining	no staining	cuprophilic cell dors/lateral sensory complexes midgut proventriculus tracheal sys
Germ_cells_testes	CG4367	CG4367	3	30	107.5	1.10505	Set 1	5.67434	38.3673	cat_term:global_finito no staining	no staining	no staining	no staining	no staining	no staining
Germ_cells_testes	CG7367	CG7367	5	303	299.175	14.1704	Set 1	4.30166	35.4012	flag_for_volker no staining	no staining	no staining	no staining	no staining	ring gland tracheal sys
Germ_cells_testes	CG10089	CG10089	3	57	148.243	2.3162	Set 1	5.48229	39.5905	cat_term:global_finito maternal no staining ubiquitous	maternal no staining ubiquitous	no staining	no staining	no staining	no staining
Germ_cells_testes	CG16717	CG16717	3	109	153.833	3.8888	Set 1	4.97574	36.1964	NA	NA	NA	NA	NA	NA
Germ_cells_testes	CG15125	CG15125	1	6	68.6201	0.245269	Set 1	5.7841	35.407	NA	NA	NA	NA	NA	NA
Germ_cells_testes	CG14400	CG14400	4	36	96.3322	1.47774	Set 1	5.28092	34.8797	NA	NA	NA	NA	NA	NA
Germ_cells_testes	CG7236	CG7236	4	120	158.065	4.78027	Set 1	4.77324	34.909	cat_term:global_finito no staining	no staining	no staining	no staining	no staining	no staining
Germ_cells_testes	HLH3B	CG2655	3	95	148.243	3.23226	Set 1	5.13039	37.0493	cat_term:global_finito maternal	faint ubiquitous no staining	no staining	no staining	midline PR	brain faint ubiquitous vent midline
Germ_cells_testes	mRpL27	CG33002	3	230	205.03	8.75021	Set 1	4.39426	33.7774	maternal	faint ubiquitous	faint ubiquitous	ant endoderm PR faint ubiquitous post endoderm PR	ant midgut PR faint ubiquitous post midgut PR	faint ubiquitous midgut
Germ_cells_testes	CG2021	CG2021	2	55	95.7579	2.36135	Set 1	4.83228	31.8752	maternal	ubiquitous	ubiquitous	ubiquitous	ubiquitous	faint ubiquitous
Germ_cells_testes	ver	CG14121	2	80	108.885	2.58962	Set 1	4.92283	33.3761	no staining	no staining	no staining	no staining	no staining	no staining
Germ_cells_testes	CG5359	CG5359	3	200	177.169	8.0088	Set 1	4.29765	32.1339	cat_term:finito1-3 cat_term:global_finito maternal	cat_term:finito4-6 cellular blastoderm list_4-6:ubiquitous ubiquitous	cat_term:finito7-8 faint ubiquitous list_7-8:ubiquitous	cat_term:finito9-10 faint ubiquitous	brain PR cat_term:finito11-12 dors/lateral sensory complexes PR vent nerve cord PR vent sensory complex SA	brain cat_term:any_neural cat_term:finito13-16 cat_term:pan_CNS dors/lateral sensory complexes midgut sensory nervous sys PR sensory sys head vent nerve cord vent sensory complex PR
Germ_cells_testes	SP1029	CG11956	26	2307	959.259	98.4072	Set 1	3.2705	32.4017	maternal	cellular blastoderm list_4-6:specific ubiquitous	faint ubiquitous list_7-8:specific	faint ubiquitous	dors trunk SA no staining	atrium cat_term:global_finito dors epidermis dors trunk head epidermis maxillary sensory complex tracheal sys vent epidermis visceral branch
Epidermal_epithelium	CG7465	CG7465	23068	761	18549.6	23.9239	Set 1	9.53964	135.264	cat_term:global_finito no staining	no staining	no staining	no staining	no staining	no staining
Epidermal_epithelium	CG11350	CG11350	8044	159	6300.22	4.21373	Set 1	10.2389	129.229	NA	NA	NA	NA	NA	NA
Epidermal_epithelium	CG32603	CG32603	10610	353	9231.3	11.4314	Set 1	9.53641	125.618	NA	NA	NA	NA	NA	NA
Epidermal_epithelium	CG14421	CG14421	4232	61	3341.97	2.27765	Set 1	9.99382	116.997	NA	NA	NA	NA	NA	NA
Epidermal_epithelium	CG7299	CG7299	10449	673	8149.43	24.1017	Set 1	8.34277	108.395	cat_term:global_finito	list_4-6:no staining no staining	list_7-8:no staining no staining	no staining	amnioserosa yolk nuclei	amnioserosa dors epidermis epipharynx fat body rectum yolk nuclei
Epidermal_epithelium	CG32241	CG32241	4847	168	3840.85	5.69322	Set 1	9.16451	109.127	NA	NA	NA	NA	NA	NA
Epidermal_epithelium	CG14424	CG14424	3986	70	3313.61	3.07384	Set 1	9.6678	113.061	no staining	no staining	no staining	no staining	no staining	no staining
Epidermal_epithelium	CG30457	CG30457	9362	696	7065.27	23.8279	Set 1	8.15264	104.246	cat_term:global_finito maternal	maternal	no staining	no staining	no staining	no staining
Epidermal_epithelium	CG14422	CG14422	2108	16	1474.72	0.467696	Set 1	9.97267	104.984	no staining	no staining	no staining	no staining	no staining	no staining
Epidermal_epithelium	CG32793	CG32793	2169	70	1925.19	2.33842	Set 1	9.17162	100.076	NA	NA	NA	NA	NA	NA
Epidermal_epithelium	CG3546	CG3546	1900	44	1601.97	1.46809	Set 1	9.34224	99.4624	NA	NA	NA	NA	NA	NA
Epidermal_epithelium	Lcp65Ag3	CG18779	6414	546	4514.56	19.2376	Set 1	7.8014	94.7144	cat_term:global_finito no staining	no staining	no staining	no staining	no staining	no staining
Epidermal_epithelium	CG43666	CG43666	1788	45	1445.5	1.71921	Set 1	9.05416	95.0538	NA	NA	NA	NA	NA	NA
Epidermal_epithelium	CG34202	CG34202	1600	59	1316.43	1.89599	Set 1	8.82836	91.4928	NA	NA	NA	NA	NA	NA
Epidermal_epithelium	CG13705	CG13705	4540	429	3885.09	15.6771	Set 1	7.86394	93.7704	cat_term:global_finito no staining	no staining	no staining	no staining	no staining	dors epidermis post spiracle
Epidermal_epithelium	CG12480	CG12480	2521	132	2002.63	5.49367	Set 1	8.26865	90.6939	cat_term:global_finito no staining	no staining	no staining	no staining	no staining	no staining
Epidermal_epithelium	CG15225	CG15225	1128	32	988.239	0.854331	Set 1	9.05782	90.1269	NA	NA	NA	NA	NA	NA
Epidermal_epithelium	CG13731	CG13731	11359	2830	9280.3	100.676	Set 1	6.51212	85.8305	NA	NA	NA	NA	NA	NA
Epidermal_epithelium	Mur89F	CG4090	961	100	1119.32	3.08071	Set 1	8.09958	82.0463	NA	NA	NA	NA	NA	NA
Epidermal_epithelium	CG1368	CG1368	7440	1364	6019.6	51.2959	Set 1	6.84682	85.9666	cat_term:global_finito	list_4-6:no staining no staining	list_7-8:no staining no staining	cat_term:finito9-10 no staining	no staining	dors apodeme dors epidermis head epidermis vent apodeme vent epidermis
unknown_3	Desi	CG14686	118	64	1462.15	2.72856	Set 1	8.61526	90.5883	NA	NA	NA	NA	NA	NA
unknown_3	CG13727	CG13727	64	32	713.381	1.71067	Set 1	8.03988	76.2225	NA	NA	NA	NA	NA	NA
unknown_3	CG13310	CG13310	23	13	262.286	0.555468	Set 1	7.39765	59.4807	NA	NA	NA	NA	NA	NA
unknown_3	CG32040	CG32040	32	49	430.076	2.0451	Set 1	7.14196	62.505	NA	NA	NA	NA	NA	NA
unknown_3	CG45072	CG45072	14	7	177.204	0.253781	Set 1	7.14298	53.4108	NA	NA	NA	NA	NA	NA
unknown_3	CG13386	CG13386	13	3	116.897	0.0459583	Set 1	6.80427	46.8228	NA	NA	NA	NA	NA	NA
unknown_3	atk	CG5195	18	119	275.127	5.204	Set 1	5.47076	44.3634	no staining	no staining	no staining	no staining	no staining	NA
unknown_3	Ptth	CG13687	3	20	60.6061	0.957897	Set 1	4.95209	29.4401	flag_for_volker no staining	no staining	no staining	no staining	no staining	brain
unknown_3	CG3301	CG3301	3	48	64.8508	1.37017	Set 1	4.77406	28.8407	NA	NA	NA	NA	NA	NA
unknown_3	CG13196	CG13196	11	306	171.621	11.9314	Set 1	3.73027	27.7214	cat_term:global_finito	list_4-6:no staining no staining	no staining	no staining	no staining	dors trunk dors vessel tracheal sys
unknown_3	Vajk4	CG30101	64	3865	818.901	139.783	Set 1	2.54022	24.5876	cat_term:global_finito	list_4-6:no staining no staining	list_7-8:no staining no staining	cat_term:finito9-10 no staining	vent epidermis PR	dors epidermis epipharynx head epidermis head epidermis dors hypopharynx oenocyte post spiracle tracheal sys vent epidermis vent sensory complex PR
unknown_3	CG18294	CG18294	NA	NA	NA	NA	NA	NA	NA	NA	list_4-6:no staining	NA	NA	NA	NA
unknown_3	CG42359	CG42359	7	407	129.647	16.1153	Set 1	2.92123	20.5349	NA	NA	NA	NA	NA	NA
unknown_3	zpg	CG10125	5	270	102.124	10.9263	Set 1	3.0981	20.7208	cat_term:global_finito maternal pole plasm	list_4-6:specific pole cell rapidly degraded	pole cell	germ cell	germ cell	germ cell
unknown_3	CG10147	CG10147	5	153	74.7133	5.47094	Set 1	3.52932	22.0317	maternal	no staining	no staining	no staining	no staining	brain vent nerve cord
unknown_3	Vajk1	CG16886	44	2771	537.653	107.287	Set 1	2.31181	20.9755	no staining	no staining	amnioserosa A	amnioserosa PR	no staining	head epidermis post spiracle vent epidermis
unknown_3	CG17027	CG17027	3	83	46.1583	2.94877	Set 1	3.54712	19.72	cat_term:global_finito	list_4-6:no staining no staining	list_7-8:no staining no staining	no staining	no staining	Malpighian tubule proventriculus proventriculus outer layer
unknown_3	eEF1alpha2	CG1873	10	342	116.057	14.181	Set 1	2.93449	20.1631	NA	NA	NA	NA	NA	NA
unknown_3	Axs	CG9703	4	201	93.3707	8.26966	Set 1	3.33238	21.8613	maternal	ubiquitous	ubiquitous	faint ubiquitous	no staining	no staining
unknown_3	CG14971	CG14971	14	644	182.627	26.7071	Set 1	2.72057	20.4604	NA	NA	NA	NA	NA	NA
Salivary_gland	EAChm	CG13463	326	136	5419.59	4.51828	Set 1	9.93975	123.295	no staining	no staining	no staining	no staining	no staining	cat_term:global_finito no staining salivary gland salivary gland body
Salivary_gland	CG18649	CG18649	97	83	1688.45	1.23163	Set 1	9.56338	102.542	cat_term:global_finito no staining	no staining	no staining	no staining	no staining	NA
Salivary_gland	CG32453	CG32453	107	23	1866.6	0.766953	Set 1	10.0449	109.158	NA	NA	NA	NA	NA	NA
Salivary_gland	CG5402	CG5402	60	8	1067.19	0.353255	Set 1	9.62317	96.8183	NA	NA	NA	NA	NA	NA
Salivary_gland	Eip74EF	CG32180	488	1484	8605.46	61.7065	Set 1	7.10049	92.812	cat_term:global_finito maternal no staining	no staining	no staining	no staining	no staining	no staining
Salivary_gland	CG34290	CG34290	52	16	817.075	0.48043	Set 1	9.10831	88.1328	NA	NA	NA	NA	NA	NA
Salivary_gland	CG14453	CG14453	57	31	960.093	1.0298	Set 1	8.88569	88.0441	maternal no staining	maternal no staining	no staining ubiquitous	no staining ubiquitous	no staining ubiquitous	salivary gland
Salivary_gland	CG14454	CG14454	47	11	772.959	0.334292	Set 1	9.17817	88.0748	faint ubiquitous maternal no staining	faint ubiquitous no staining	no staining	no staining	ant midgut PR hindgut proper PR no staining post midgut PR	midgut salivary gland
Salivary_gland	CG13738	CG13738	32	6	516.471	0.242803	Set 1	8.69895	78.4239	cat_term:global_finito no staining	no staining	no staining	no staining	no staining	no staining salivary gland
Salivary_gland	CG33160	CG33160	16	2	326.345	0.0439727	Set 1	8.28817	69.2449	NA	NA	NA	NA	NA	NA
Salivary_gland	CG30371	CG30371	36	108	588.669	1.94793	Set 1	7.64161	70.3315	NA	NA	NA	NA	NA	NA
Salivary_gland	CG9812	CG9812	109	590	2081.26	23.1912	Set 1	6.42684	70.849	cat_term:global_finito	list_4-6:no staining no staining	no staining	no staining	no staining	dors trunk tracheal sys visceral branch
Salivary_gland	CG30411	CG30411	60	148	1088.12	5.32851	Set 1	7.42575	74.918	cat_term:global_finito no staining	no staining	no staining	no staining	no staining	no staining
Salivary_gland	CG10175	CG10175	112	551	2169.79	23.6543	Set 1	6.45957	71.5979	cat_term:global_finito	list_4-6:no staining no staining	no staining	cat_term:finito9-10 no staining	no staining	adult foregut precursor dors epidermis foregut head epidermis head epidermis dors post spiracle proventriculus salivary gland salivary gland body tracheal sys vent epidermis
Salivary_gland	nur	CG31813	1085	15036	19856.5	670.23	Set 1	4.88666	69.7688	maternal	maternal rapidly degraded	no staining	no staining	salivary gland PR	salivary gland
Salivary_gland	CG43139	CG43139	30	22	589.478	1.03302	Set 1	8.17967	75.2999	NA	NA	NA	NA	NA	NA
Salivary_gland	CG14636	CG14636	110	780	1979.17	32.026	Set 1	5.90515	64.6697	cat_term:global_finito	no staining	list_7-8:no staining no staining	no staining	cat_term:finito11-12 salivary gland body PR	atrium cat_term:finito13-16 central brain neuron dors epidermis foregut head epidermis head epidermis dors hindgut midgut post spiracle salivary gland tracheal sys vent epidermis
Salivary_gland	pip	CG9614	962	17753	18120.8	844.344	Set 1	4.42196	62.5506	cat_term:global_finito flag_for_volker no staining	list_4-6:no staining no staining	no staining	no staining salivary gland A	salivary gland body PR salivary gland PR	atrium dors/lateral sensory complexes epipharynx foregut post spiracle salivary gland salivary gland body
Salivary_gland	CG43181	CG43181	17	30	279.946	1.19952	Set 1	6.99182	56.8725	NA	NA	NA	NA	NA	NA
Salivary_gland	CG1986	CG1986	73	601	1315.04	25.7338	Set 1	5.6203	58.2374	NA	list_4-6:no staining	list_7-8:no staining	NA	NA	anal pad cat_term:global_finito dors epidermis head epidermis salivary gland
Neuron_unknown_3	Nepl15	CG4721	409	405	5542.17	17.6378	Set 1	8.21607	102.179	cat_term:global_finito no staining	no staining	no staining	no staining	no staining	dors epidermis head epidermis dors lateral cord sensory nervous sys PR vent epidermis vent sensory complex PR
Neuron_unknown_3	Mdr65	CG10181	92	111	1339.77	3.47157	Set 1	8.22699	85.4689	NA	list_4-6:no staining	list_7-8:no staining	NA	NA	cat_term:global_finito central brain glia central brain surface glia lateral cord glia lateral cord surface glia vent midline
Neuron_unknown_3	CG32032	CG32032	181	367	2475.89	14.5322	Set 1	7.31654	82.489	NA	NA	NA	NA	NA	NA
Neuron_unknown_3	CG15203	CG15203	68	89	671.522	2.92457	Set 1	7.41876	69.6877	NA	list_4-6:no staining no staining	no staining	no staining	no staining	cat_term:global_finito dors epidermis vent epidermis
Neuron_unknown_3	CG5687	CG5687	55	152	775.215	4.22267	Set 1	7.21366	69.2534	NA	NA	NA	NA	NA	NA
Neuron_unknown_3	Spn43Ad	CG1859	35	35	428.151	1.17478	Set 1	7.62111	66.6492	cat_term:global_finito no staining	no staining	no staining	no staining	no staining	no staining
Neuron_unknown_3	Cyp9h1	CG17577	17	11	223.928	0.380195	Set 1	7.34202	57.3656	NA	NA	NA	NA	NA	NA
Neuron_unknown_3	CG3168	CG3168	243	2231	2645.56	65.0069	Set 1	5.32482	60.5426	cat_term:global_finito	list_4-6:no staining no staining	no staining	amnioserosa no staining	no staining yolk nuclei	amnioserosa brain central brain glia central brain surface glia central nervous sys hindgut lateral cord glia Malpighian tubule Malpighian tubule tip cell vent midline vent nerve cord yolk nuclei
Neuron_unknown_3	bdl	CG16857	43	143	577.323	5.30533	Set 1	6.51666	59.7951	cat_term:global_finito	list_4-6:no staining no staining	no staining	no staining	no staining	dors epidermis dors/lateral sensory complexes
Neuron_unknown_3	prc	CG5700	221	2313	2803.4	94.5768	Set 1	4.87437	55.8285	no staining	list_4-6:no staining no staining	no staining	cat_term:finito9-10 no staining	no staining	cat_term:global_finito central brain surface glia dors epidermis dors imaginal precursor dors vessel head epidermis lateral cord surface glia oenocyte pericardial cell plasmatocytes vent midline
Neuron_unknown_3	CG9336	CG9336	156	1520	2237.79	66.5741	Set 1	5.04946	56.193	no staining	list_4-6:no staining no staining	list_7-8:no staining no staining	cat_term:finito9-10 no staining	cardiac mesoderm PR dors vessel SA midline PR tracheal PR	Bolwig's organ cat_term:global_finito circulatory sys dors vessel dors/lateral sensory complexes gonad head epidermis sensory sys head tracheal sys vent midline vent sensory complex PR
Neuron_unknown_3	CG9338	CG9338	76	422	911.324	16.918	Set 1	5.66849	55.7405	cat_term:global_finito	list_4-6:no staining no staining	list_7-8:no staining no staining	cat_term:finito9-10 no staining	no staining tracheal PR	anal pad Bolwig's organ dors epidermis dors vessel plasmatocytes tracheal sys
Neuron_unknown_3	hoe1	CG12787	126	1151	1424.73	50.2112	Set 1	4.79808	50.2718	cat_term:global_finito maternal	NA	no staining	no staining	no staining	no staining
Neuron_unknown_3	rgn	CG6014	124	1119	1283.7	40.0559	Set 1	4.96657	51.2909	cat_term:global_finito no staining	no staining	no staining	no staining	no staining	no staining
Neuron_unknown_3	CG1572	CG1572	96	1436	1404.2	53.7959	Set 1	4.67954	48.9318	cat_term:global_finito	list_4-6:no staining no staining	list_7-8:no staining no staining	cat_term:finito9-10 no staining	no staining	Bolwig's organ circulatory sys dors vessel gonad head epidermis lymph gland oenocyte proventriculus ring gland somatic muscle vent midline vent nerve cord
Neuron_unknown_3	MFS9	CG4288	27	103	266.935	3.59745	Set 1	5.85951	47.2613	cat_term:global_finito no staining	no staining	no staining	no staining	no staining	no staining
Neuron_unknown_3	CG10226	CG10226	12	59	215.715	2.32894	Set 1	6.01792	46.697	cat_term:global_finito maternal	no staining	no staining	no staining	no staining	no staining
Neuron_unknown_3	atilla	CG6579	41	242	502.962	9.73215	Set 1	5.55044	49.8272	no staining	no staining	no staining	no staining	no staining	dors epidermis head epidermis tracheal sys vent epidermis
Neuron_unknown_3	Irk2	CG4370	NA	NA	NA	NA	NA	NA	NA	cat_term:global_finito	list_4-6:no staining no staining	no staining	no staining	no staining	large intestine small intestine
Neuron_unknown_3	loh	CG6232	61	846	946.117	35.0335	Set 1	4.71461	46.6152	NA	NA	NA	NA	NA	NA
Salivary gland_LS	CG11300	CG11300	474	20	5447.17	0.587489	Set 1	11.7445	145.768	no staining	no staining	no staining	no staining	no staining	no staining
Salivary gland_LS	CG32198	CG32198	217	10	2784.88	0.395123	Set 1	10.963	125.46	NA	NA	NA	NA	NA	NA
Salivary gland_LS	CG13460	CG13460	258	11	1958.53	0.394025	Set 1	10.4563	114.353	NA	NA	NA	NA	NA	NA
Salivary gland_LS	CG13135	CG13135	89	18	2140.47	0.803063	Set 1	10.2133	113.003	NA	NA	NA	NA	NA	NA
Salivary gland_LS	CG12310	CG12310	140	9	1642.54	0.563269	Set 1	10.0371	107.223	cat_term:global_finito no staining	no staining	no staining	no staining	no staining	no staining
Salivary gland_LS	CG17134	CG17134	183	163	2826.41	4.65159	Set 1	8.9661	102.799	cat_term:global_finito no staining	no staining	no staining	no staining	no staining	no staining
Salivary gland_LS	CG32189	CG32189	111	3	1163.32	0.105813	Set 1	10.0389	102.249	no staining	no staining	no staining	no staining	no staining	NA
Salivary gland_LS	CG10918	CG10918	171	23	1372.44	0.963137	Set 1	9.44937	98.4962	no staining	no staining	no staining	no staining	no staining	no staining
Salivary gland_LS	CG42815	CG42815	63	8	969.311	0.30464	Set 1	9.53716	94.6306	NA	NA	NA	NA	NA	NA
Salivary gland_LS	CG13461	CG13461	105	2	896.125	0.144404	Set 1	9.61296	94.2951	no staining	no staining	no staining	no staining	no staining	no staining
Salivary gland_LS	CG13560	CG13560	114	11	954.788	0.388075	Set 1	9.42595	93.3221	NA	NA	NA	NA	NA	NA
Salivary gland_LS	CG14852	CG14852	46	7	831.18	0.28476	Set 1	9.33752	90.5809	no staining	no staining	no staining	no staining	no staining	no staining
Salivary gland_LS	CG14265	CG14265	82	9	884.592	0.309443	Set 1	9.39992	92.0298	no staining	no staining	no staining	no staining	no staining	NA
Salivary gland_LS	lcs	CG12794	35	2	662.976	0.107742	Set 1	9.22519	86.486	maternal	ubiquitous	no staining	no staining	no staining	faint ubiquitous midgut
Salivary gland_LS	Muc68Ca	CG18331	66	18	919.345	0.746724	Set 1	9.03981	89.0062	NA	NA	NA	NA	NA	NA
Salivary gland_LS	Ag5r	CG9538	137	99	1448.99	4.01404	Set 1	8.17486	85.8509	NA	NA	NA	NA	NA	NA
Salivary gland_LS	Pig1	CG10790	58	8	546.242	0.398771	Set 1	8.60924	78.3099	cat_term:global_finito no staining	no staining	no staining	no staining	no staining	no staining
Salivary gland_LS	CG13947	CG13947	56	35	816.627	1.57117	Set 1	8.31111	80.4125	NA	NA	NA	NA	NA	NA
Salivary gland_LS	CG31496	CG31496	46	11	626.715	0.492381	Set 1	8.71405	80.9881	no staining	no staining	no staining	no staining	no staining	no staining
Salivary gland_LS	CG9040	CG9040	60	3	415.709	0.106828	Set 1	8.553	74.4359	no staining	no staining	no staining	no staining	no staining	no staining
unknown_4	Ccp84Ae	CG1330	469	90	3154.22	2.83245	Set 1	9.6848	112.572	cat_term:global_finito no staining	no staining	no staining	no staining	no staining	no staining
unknown_4	CG14095	CG14095	816	285	5676.82	10.7475	Set 1	8.91659	111.2	NA	NA	NA	NA	NA	NA
unknown_4	CG13674	CG13674	349	138	2373.9	4.08908	Set 1	8.86564	99.4162	NA	NA	NA	NA	NA	NA
unknown_4	CG13051	CG13051	253	107	1648.11	3.40418	Set 1	8.54772	91.3535	NA	NA	NA	NA	NA	NA
unknown_4	CG14570	CG14570	122	22	786.293	0.414367	Set 1	9.11877	87.7294	cat_term:global_finito no staining	no staining	no staining	no staining	no staining	no staining
unknown_4	CG13678	CG13678	253	146	1704.81	5.53492	Set 1	8.02722	86.1822	no staining	no staining	no staining	no staining	no staining	cat_term:global_finito tracheal sys
unknown_4	CG13047	CG13047	598	685	3717.79	25.4545	Set 1	7.13478	84.623	NA	NA	NA	NA	NA	NA
unknown_4	CG13069	CG13069	129	35	871.016	1.19526	Set 1	8.63216	84.3208	NA	NA	NA	NA	NA	NA
unknown_4	CG9269	CG9269	178	74	1083.1	2.7236	Set 1	8.18425	82.516	NA	NA	NA	NA	NA	NA
unknown_4	CG5070	CG5070	190	110	1216.73	3.74524	Set 1	8.00231	82.0236	no staining	no staining	no staining	no staining	no staining	no staining
unknown_4	CG14096	CG14096	166	99	1181.36	3.56035	Set 1	8.01708	81.834	NA	NA	NA	NA	NA	NA
unknown_4	CG13066	CG13066	123	48	805.473	1.51688	Set 1	8.32205	80.3534	NA	NA	NA	NA	NA	NA
unknown_4	CG13068	CG13068	105	29	674.743	0.847257	Set 1	8.51281	80.0232	NA	NA	NA	NA	NA	NA
unknown_4	CG32214	CG32214	139	85	987.342	2.83719	Set 1	8.00736	79.6641	NA	NA	NA	NA	NA	NA
unknown_4	CG14568	CG14568	118	75	907.271	2.61665	Set 1	7.97074	78.3283	cat_term:global_finito no staining	no staining	no staining	no staining	no staining	no staining
unknown_4	CG18294	CG18294	138	98	961.433	3.31693	Set 1	7.79904	77.2927	NA	list_4-6:no staining	no staining	no staining	no staining	tracheal sys
unknown_4	CG13067	CG13067	157	153	1030.47	4.51365	Set 1	7.54608	75.5399	flag_for_volker no staining	no staining	no staining	no staining	no staining	embryonic salivary gland duct tracheal sys
unknown_4	CG13049	CG13049	643	1567	4340.19	58.7747	Set 1	6.18208	74.7035	cat_term:global_finito maternal ubiquitous	faint ubiquitous list_4-6:ubiquitous ubiquitous	faint ubiquitous list_7-8:ubiquitous ubiquitous	faint ubiquitous ubiquitous	ant midgut PR post midgut PR ubiquitous	dors branch dors trunk embryonic midgut post spiracle tracheal sys visceral branch
unknown_4	CG13679	CG13679	119	79	834.558	3.10291	Set 1	7.66822	74.4323	cat_term:global_finito maternal	faint ubiquitous	faint ubiquitous	faint ubiquitous	faint ubiquitous	faint ubiquitous
unknown_4	CG32213	CG32213	79	19	514.221	0.737971	Set 1	8.20884	73.9538	NA	NA	NA	NA	NA	NA
unknown_5	Irk2	CG4370	361	62	3321.14	1.51762	Set 1	10.3654	121.253	cat_term:global_finito	list_4-6:no staining no staining	no staining	no staining	no staining	embryonic large intestine embryonic small intestine
unknown_5	Rh50	CG7499	158	52	1209.33	1.78873	Set 1	8.76039	89.7168	cat_term:global_finito no staining	no staining	no staining	no staining	no staining	no staining
unknown_5	CG6409	CG6409	314	1053	2681.03	42.5624	Set 1	5.94356	67.6919	cat_term:global_finito	list_4-6:no staining no staining	list_7-8:no staining no staining	no staining	no staining	embryonic anal pad embryonic large intestine embryonic vent epidermis
unknown_5	CG4928	CG4928	947	4311	6403.81	163.429	Set 1	5.28339	66.8081	cat_term:global_finito no staining	no staining	no staining	no staining	no staining	no staining
unknown_5	EbpIII	CG11390	101	139	815.817	5.8659	Set 1	6.89265	66.6786	NA	NA	NA	NA	NA	NA
unknown_5	CG1143	CG1143	96	172	799.07	6.68246	Set 1	6.70061	64.6205	NA	NA	NA	NA	NA	NA
unknown_5	CG32564	CG32564	302	1603	2121.24	51.9759	Set 1	5.32343	58.8312	cat_term:global_finito no staining	list_4-6:no staining no staining	list_7-8:no staining no staining	no staining	hindgut proper PR large intestine SA	embryonic anal pad embryonic large intestine
unknown_5	CG12826	CG12826	52	97	447.324	3.56446	Set 1	6.61473	58.2652	NA	NA	NA	NA	NA	NA
unknown_5	CG7778	CG7778	65	105	415.49	4.42398	Set 1	6.25932	54.4695	cat_term:global_finito	list_4-6:no staining no staining	list_7-8:no staining no staining	no staining	no staining	atrium embryonic anal pad embryonic head epidermis embryonic hindgut embryonic large intestine embryonic vent epidermis
unknown_5	CG6337	CG6337	77	861	726.541	18.8805	Set 1	5.19162	49.3561	cat_term:global_finito	list_4-6:no staining no staining	no staining	no staining	no staining	embryonic Malpighian tubule embryonic hindgut embryonic main segment of Malpighian tubule
unknown_5	ine	CG15444	143	1103	1263.3	49.0389	Set 1	4.65801	47.9967	cat_term:global_finito maternal	list_4-6:no staining no staining	list_7-8:no staining no staining	no staining	ant midgut PR faint ubiquitous hindgut proper PR post midgut PR	dors vessel embryonic Malpighian tubule embryonic anal pad embryonic brain embryonic central nervous sys embryonic dors epidermis embryonic hindgut embryonic large intestine embryonic midgut embryonic vent epidermis lateral cord glia vent nerve cord
unknown_5	AdoR	CG9753	29	42	205.785	1.7906	Set 1	6.20442	47.7244	NA	NA	NA	NA	NA	NA
unknown_5	CG13285	CG13285	65	148	334.363	5.73618	Set 1	5.63334	47.2613	NA	NA	NA	NA	NA	NA
unknown_5	CG9021	CG9021	20	17	159.42	0.845755	Set 1	6.43248	47.1225	cat_term:global_finito no staining	no staining	no staining	no staining	no staining	no staining
unknown_5	Vha16-1	CG3161	2578	52366	19208.5	2109.22	Set 1	3.18628	45.3392	NA	NA	NA	NA	NA	NA
unknown_5	Vha68-2	CG3762	447	5720	2753.11	208.651	Set 1	3.715	42.4527	maternal	cellular blastoderm list_4-6:specific maternal rapidly degraded ubiquitous	faint ubiquitous list_7-8:ubiquitous pole cell	faint ubiquitous head mesoderm PR	amnioserosa ant midgut PR dors pharyngeal muscle PR faint ubiquitous garland cell PR head mesoderm PR plasmatocytes A post midgut PR somatic muscle PR yolk nuclei	cat_term:global_finito embryonic Malpighian tubule embryonic anal pad embryonic gastric caecum embryonic hindgut embryonic midgut garland cell muscle sys plasmatocytes ubiquitous
unknown_5	comm3	CG42334	70	635	648.749	27.0006	Set 1	4.53413	42.3657	flag_for_volker no staining	no staining	no staining	no staining	yolk nuclei	embryonic hindgut
unknown_5	CG14419	CG14419	77	878	702.362	30.8517	Set 1	4.46277	42.2094	cat_term:global_finito	list_4-6:no staining no staining	no staining	no staining	no staining	embryonic anal pad embryonic dors epidermis embryonic hindgut embryonic large intestine embryonic vent epidermis
[truncated: 22 more rows]
